# Supplementary material for: Multi-omic analysis of bat versus human fibroblasts reveals altered central metabolism
Source: eLife. 2024 Jul 22;13:e94007. doi: 10.7554/eLife.94007 (PMC11262796; doi:10.7554/eLife.94007)
Supplement: Supplementary file 1. — Differential expression analysis was performed using the DESeq2 pipeline. Fold changes are indicated as PaLung/WI-38. [file elife-94007-supp1.xlsx]

## Sheet: Index
Title	Multi-omic analysis of bat versus human fibroblasts reveals altered central metabolism
Authors	N. Suhas Jagannathan, Javier Yu Peng Koh, Younghwan Lee, Radoslaw M Sobota, Aaron Irving, Lin-Fa Wang, Yoko Itahana, Koji Itahana, Lisa Tucker-Kellogg
Supplementary Table No.	Supplementary Table 1
Supplementary Table Title	Genes that pass our differential expression cutoffs (FDR < 0.05; |Log Fold change| > 1 ) in PaLung vs WI-38 samples from whole-cell Transcriptomics data
Description	Differential expression analysis was performed using the DESeq2 pipeline. Fold changes are indicated as PaLung/WI-38
Column header	Contents
Gene	Gene/Transcript ID
baseMean	Average of normalized count values over all samples
log2FoldChange	Log Fold change of gene expression (PaLung/WI38)
lfcSE	Standard error estimate for log2FoldChange
stat	Value of test statistic for the gene/transcript
pvalue	Raw pvalue computed from DEseq2
padj	FDR corrected p-value (Adjusted) from DEseq2

## Sheet: Sheet1
Gene	baseMean	log2FoldChange	lfcSE	stat	pvalue	padj
A1BG	30.4736	3.69336	0.64667	5.71136	1.12078e-08	2.49243e-08
A2M	452.741	-9.97175	0.914116	-10.9086	1.04826e-27	6.68504e-27
A4GALT	691.04	1.95198	0.134164	14.5492	5.90569e-48	7.58888e-47
AAAS	227.488	-1.14005	0.163027	-6.99305	2.68974e-12	7.62454e-12
AACS	193.471	-5.86954	0.361737	-16.226	3.3035e-59	5.83926e-58
AAGAB	785.935	-1.47298	0.11853	-12.4271	1.8633e-35	1.57046e-34
AARS	3018.63	1.98758	0.126207	15.7486	7.0245e-56	1.12711e-54
AARS2	216.367	-1.32944	0.166027	-8.00737	1.1719e-15	4.07096e-15
AASDHPPT	244.208	1.85149	0.18468	10.0254	1.179e-23	6.21445e-23
AASS	232.061	1.76524	0.239836	7.36021	1.83626e-13	5.59502e-13
ABAT	22.0985	-5.37297	1.13472	-4.73507	2.1898e-06	4.09122e-06
ABCA3	43.4558	1.31445	0.378619	3.47169	0.000517198	0.000793888
ABCA5	63.2664	2.69832	0.315922	8.54109	1.3296e-17	5.1295e-17
ABCA9	13.7318	6.27347	1.32615	4.73059	2.23871e-06	4.18063e-06
ABCB1	185.251	4.29329	0.26514	16.1925	5.69695e-59	9.99631e-58
ABCB6	271.561	4.84086	0.260264	18.5998	3.22371e-77	9.12523e-76
ABCB8	486.907	1.25483	0.136157	9.21604	3.08288e-20	1.37754e-19
ABCB9	48.1222	-1.53507	0.341789	-4.49128	7.07958e-06	1.27447e-05
ABCC1	1353.54	-1.69931	0.217447	-7.81481	5.50455e-15	1.84129e-14
ABCC10	305.043	-1.39279	0.152261	-9.14742	5.83113e-20	2.56732e-19
ABCC3	182.648	-6.78226	0.485812	-13.9607	2.7091e-44	3.07031e-43
ABCC4	2362.48	-2.86385	0.133054	-21.524	9.28956e-103	4.64556e-101
ABCC5	492.256	-1.00741	0.180925	-5.5681	2.57536e-08	5.57632e-08
ABCC6	17.015	-5.62026	1.14161	-4.92312	8.51773e-07	1.64277e-06
ABCC9	71.4756	2.11156	0.366367	5.76349	8.23904e-09	1.85456e-08
ABCF1	615.549	-1.31421	0.127985	-10.2685	9.76872e-25	5.41794e-24
ABCG1	289.617	2.49505	0.293985	8.48699	2.12055e-17	8.0925e-17
ABCG2	65.7085	1.60271	0.290467	5.51771	3.43439e-08	7.37381e-08
ABCG4	18.9877	1.29309	0.49061	2.63568	0.00839681	0.0114612
ABHD1	47.0451	1.25789	0.332561	3.78244	0.000155301	0.000249823
ABHD10	241.932	-1.4602	0.197287	-7.40139	1.34763e-13	4.15044e-13
ABHD11	109.258	1.27687	0.211756	6.02994	1.64022e-09	3.88207e-09
ABHD14A	147.992	2.24204	0.197926	11.3277	9.56846e-30	6.55483e-29
ABHD15	269.393	-2.37849	0.159934	-14.8717	5.02858e-50	6.89749e-49
ABHD16A	185.516	3.39112	0.235873	14.3769	7.22675e-47	8.96953e-46
ABHD16B	32.0219	8.24003	1.24646	6.61075	3.82381e-11	1.00116e-10
ABHD18	154.69	2.63064	0.210579	12.4924	8.21263e-36	7.04323e-35
ABHD3	179.268	2.37934	0.206903	11.4998	1.3224e-30	9.39692e-30
ABHD4	1474.18	2.64485	0.196409	13.466	2.478e-41	2.53115e-40
ABHD6	97.8546	-1.9615	0.329187	-5.95863	2.54354e-09	5.9508e-09
ABI3	13.0347	-6.04238	1.30259	-4.63874	3.50532e-06	6.45853e-06
ABL1	2931.46	-1.22424	0.13439	-9.10956	8.27142e-20	3.60995e-19
ABLIM1	497.882	1.60003	0.149352	10.7132	8.82965e-27	5.40681e-26
ABLIM3	555.906	-3.47713	0.205835	-16.8928	5.08245e-64	1.01328e-62
ABTB1	147.847	-1.86236	0.295218	-6.3084	2.81929e-10	7.03036e-10
ABTB2	94.1201	-1.33817	0.296757	-4.5093	6.50423e-06	1.17442e-05
ACAA1	72.6599	-4.21754	0.396107	-10.6475	1.79163e-26	1.0811e-25
ACAA2	686.959	2.16831	0.14571	14.881	4.37756e-50	6.03209e-49
ACACA	1049.1	-1.34868	0.106558	-12.6567	1.02685e-36	9.04197e-36
ACACB	21.8025	-5.0206	0.866733	-5.79255	6.93256e-09	1.56753e-08
ACAD10	133.529	-1.42429	0.216435	-6.5807	4.68231e-11	1.21972e-10
ACAD11	106.1	8.36069	1.04154	8.0272	9.97225e-16	3.47523e-15
ACAD8	174.139	-1.99724	0.190186	-10.5015	8.49845e-26	4.97311e-25
ACADL	143.603	11.2178	1.19521	9.38567	6.25163e-21	2.89252e-20
ACADM	84.9991	-8.58866	1.20334	-7.13736	9.51406e-13	2.77559e-12
ACADS	180.163	1.71454	0.202372	8.47222	2.40759e-17	9.16166e-17
ACADSB	50.8318	-2.30667	0.382603	-6.0289	1.65083e-09	3.90639e-09
ACADVL	1197	-2.18921	0.129268	-16.9355	2.46439e-64	4.93784e-63
ACAN	11.6361	3.53412	0.878266	4.02397	5.72243e-05	9.54958e-05
ACAP2	947.553	-1.5532	0.12087	-12.8502	8.58071e-38	7.8615e-37
ACAP3	605.373	-3.87031	0.191624	-20.1974	1.03155e-90	4.2111e-89
ACAT2	270.553	1.82497	0.27337	6.67582	2.45854e-11	6.5181e-11
ACBD4	127.894	1.42492	0.232761	6.12183	9.25061e-10	2.22899e-09
ACE	7.07104	-3.2147	1.09883	-2.92558	0.0034382	0.00488577
ACER3	475.868	1.78917	0.168517	10.6171	2.48121e-26	1.48972e-25
ACHE	19.5115	1.17735	0.468543	2.5128	0.0119777	0.0160765
ACKR3	69.7632	3.75169	0.435705	8.61063	7.26627e-18	2.84534e-17
ACKR4	11.1498	3.62861	0.899486	4.03409	5.4814e-05	9.16774e-05
ACO2	414.374	1.02667	0.145504	7.05596	1.71414e-12	4.92062e-12
ACOT11	81.5065	3.85368	0.330725	11.6522	2.23519e-31	1.63279e-30
ACOT13	368.745	3.14951	0.182119	17.2936	5.25208e-67	1.13782e-65
ACOT6	41.1826	8.60345	1.21423	7.08552	1.38521e-12	4.00031e-12
ACOT9	858.543	1.82122	0.113892	15.9907	1.48293e-57	2.48925e-56
ACOX1	965.095	1.09834	0.123555	8.88948	6.1395e-19	2.53915e-18
ACOX2	90.2578	1.26737	0.39233	3.23037	0.00123629	0.00183434
ACOX3	204.671	-1.38912	0.19123	-7.2641	3.75533e-13	1.12538e-12
ACOXL	8.57838	3.94152	0.932459	4.22701	2.36813e-05	4.08249e-05
ACP6	126.825	2.16412	0.229544	9.42792	4.183e-21	1.95044e-20
ACPP	9.14273	-3.45591	1.06248	-3.25268	0.00114322	0.00169961
ACPT	10.7951	-2.32954	0.701267	-3.3219	0.000894064	0.00134216
ACRC	24.8014	1.10581	0.485824	2.27616	0.0228365	0.0296627
ACSF2	93.9245	-5.38315	0.462842	-11.6307	2.87872e-31	2.0927e-30
ACSL5	78.9755	3.12461	0.312124	10.0108	1.36652e-23	7.1871e-23
ACSM3	36.4587	5.55056	0.733827	7.56386	3.91276e-14	1.24367e-13
ACSS1	317.375	4.58979	0.220859	20.7816	6.35054e-96	2.89807e-94
ACSS3	111.186	1.69928	0.231813	7.33037	2.29525e-13	6.95998e-13
ACTA2	30907.4	7.02081	0.181869	38.6037	0	0
ACTC1	1912.97	12.0986	0.746742	16.2019	4.89151e-59	8.59559e-58
ACTG2	6013.83	3.44369	0.208524	16.5146	2.87935e-61	5.30845e-60
ACTL10	19.8093	-4.80035	0.966053	-4.96903	6.72873e-07	1.30867e-06
ACTL7A	7.66588	4.97241	1.33507	3.72446	0.000195733	0.000312129
ACTN2	6.94098	5.09954	1.38377	3.68525	0.000228481	0.000361962
ACTR3B	77.9576	3.88506	0.367632	10.5678	4.20261e-26	2.48962e-25
ACTR6	63.361	-2.40668	0.310169	-7.75925	8.54351e-15	2.83414e-14
ACVR1B	320.374	-1.63019	0.144341	-11.294	1.40489e-29	9.54787e-29
ACVR2A	257.037	1.79166	0.167148	10.719	8.28712e-27	5.08237e-26
ACVR2B	53.6147	-2.64354	0.380193	-6.95315	3.5722e-12	1.00477e-11
ACVRL1	228.231	-7.60022	0.690206	-11.0115	3.36304e-28	2.18061e-27
ACY1	22.0926	1.78425	0.515889	3.45859	0.000543011	0.000832127
ACYP1	53.7805	1.73037	0.293485	5.89594	3.7255e-09	8.59463e-09
ADAM11	6.4435	-2.30199	0.946726	-2.43153	0.0150354	0.0199706
ADAM12	1080.41	3.10003	0.19205	16.1417	1.29854e-58	2.25218e-57
ADAM17	690.178	1.38457	0.121047	11.4383	2.69148e-30	1.8935e-29
ADAM19	1444.09	1.01486	0.19327	5.25097	1.51303e-07	3.09307e-07
ADAM22	14.4761	1.79589	0.607818	2.95466	0.00313014	0.00446993
ADAM23	46.6429	-9.18715	1.24646	-7.37062	1.69835e-13	5.19063e-13
ADAM8	19.728	-6.84095	1.29639	-5.27691	1.31377e-07	2.69814e-07
ADAMTS1	4406.94	-3.4719	0.226074	-15.3574	3.16045e-53	4.76529e-52
ADAMTS10	168.927	1.24452	0.29911	4.16076	3.17196e-05	5.41612e-05
ADAMTS12	993.186	-1.5091	0.165531	-9.11669	7.74572e-20	3.38544e-19
ADAMTS13	13.2397	-4.27544	0.891212	-4.79734	1.6079e-06	3.03728e-06
ADAMTS14	733.496	3.74556	0.270791	13.8319	1.63631e-43	1.80672e-42
ADAMTS15	674.916	2.17041	0.799881	2.71342	0.00665934	0.00919741
ADAMTS17	193.771	9.1356	1.03631	8.81547	1.19179e-18	4.86361e-18
ADAMTS19	116.389	-10.3857	1.19788	-8.67009	4.31798e-18	1.71433e-17
ADAMTS2	608.276	-6.23683	0.309029	-20.182	1.40973e-90	5.73544e-89
ADAMTS20	26.3174	8.12298	1.27804	6.35579	2.07359e-10	5.21137e-10
ADAMTS4	87.3389	2.75883	0.347423	7.94082	2.00841e-15	6.88503e-15
ADAMTS5	450.889	2.28667	0.288842	7.91668	2.43934e-15	8.30552e-15
ADAMTS6	692.984	3.03035	0.191342	15.8374	1.71777e-56	2.80118e-55
ADAMTS9	54.3066	-1.47054	0.436017	-3.37267	0.000744425	0.00112739
ADAMTSL1	944.189	3.04008	0.183591	16.559	1.37823e-61	2.56857e-60
ADAMTSL3	35.4199	6.56135	1.10019	5.96381	2.4642e-09	5.76741e-09
ADAR	3113.19	-2.41861	0.101115	-23.9193	1.92824e-126	1.54285e-124
ADARB1	701.263	2.82586	0.222941	12.6754	8.09603e-37	7.15527e-36
ADAT1	232.779	-1.70602	0.172585	-9.88505	4.83318e-23	2.47791e-22
ADAT2	57.6943	2.16586	0.292838	7.3961	1.40245e-13	4.31042e-13
ADCK1	60.9003	-2.42114	0.288169	-8.40182	4.39593e-17	1.64464e-16
ADCK2	315.794	1.20262	0.146713	8.19711	2.46227e-16	8.85591e-16
ADCY3	538.706	1.61302	0.160663	10.0398	1.01923e-23	5.39605e-23
ADCY5	11.5494	1.51368	0.623786	2.4266	0.015241	0.0202281
ADCY6	739.913	-1.00167	0.129051	-7.76178	8.37424e-15	2.77952e-14
ADCY9	1054.74	-1.39694	0.171895	-8.1267	4.41133e-16	1.5706e-15
ADCYAP1R1	31.9318	8.62617	1.23568	6.9809	2.93305e-12	8.30052e-12
ADD2	10.431	7.42885	1.32133	5.62224	1.88497e-08	4.12309e-08
ADD3	1563.02	-3.73151	0.179713	-20.7637	9.21407e-96	4.18891e-94
ADGRA2	1764.94	-1.13262	0.149614	-7.57029	3.72385e-14	1.18519e-13
ADGRB2	181.705	-2.87821	0.214621	-13.4107	5.23681e-41	5.29504e-40
ADGRD1	93.4133	6.40398	0.556344	11.5108	1.16354e-30	8.27792e-30
ADGRF5	16.3126	2.78361	0.61226	4.54646	5.4556e-06	9.89949e-06
ADGRG6	1854.15	4.14162	0.163768	25.2896	4.1623e-141	4.42088e-139
ADGRL2	231.578	-4.68802	0.354808	-13.2128	7.40004e-40	7.16252e-39
ADGRL3	19.8756	-2.92398	0.615205	-4.75285	2.00568e-06	3.76069e-06
ADGRL4	61.0169	-9.1936	1.20555	-7.62606	2.42039e-14	7.81951e-14
ADGRV1	17.4503	1.71895	0.63324	2.71453	0.00663693	0.00916856
ADH5	800.492	-2.24515	0.134161	-16.7347	7.31887e-63	1.41224e-61
ADHFE1	22.8847	-1.72337	0.520621	-3.31022	0.000932236	0.00139771
ADM	3758.3	1.58111	0.225919	6.99856	2.58609e-12	7.34286e-12
ADM2	13.2256	-5.71104	1.30402	-4.37956	1.18921e-05	2.1005e-05
ADORA2A	9.55815	4.27652	1.02859	4.15766	3.21526e-05	5.48615e-05
ADORA2B	250.866	-3.42059	0.275913	-12.3974	2.70069e-35	2.26195e-34
ADPRH	178.554	6.37585	0.377564	16.8868	5.62569e-64	1.11787e-62
ADPRHL1	18.0476	1.40001	0.489273	2.86141	0.00421755	0.00594819
ADRA1D	14.2748	-6.98912	1.38227	-5.05628	4.27514e-07	8.44056e-07
ADRA2C	43.7668	4.13675	0.474472	8.71864	2.81567e-18	1.13022e-17
ADRB2	72.6322	-3.00909	0.396654	-7.58617	3.29495e-14	1.05259e-13
ADRBK2	45.9091	-3.8142	0.467974	-8.15045	3.62562e-16	1.29585e-15
ADSSL1	38.1592	1.72869	0.371706	4.65069	3.30829e-06	6.1058e-06
AEBP1	11071.3	5.70064	0.189989	30.0051	8.41315e-198	2.06071e-195
AES	1686.79	2.08595	0.119369	17.4748	2.22973e-68	4.98346e-67
AFAP1	864.89	-1.16828	0.131354	-8.89411	5.88899e-19	2.43807e-18
AFAP1L1	77.1462	-9.5207	1.20069	-7.92934	2.20305e-15	7.52449e-15
AFAP1L2	125.157	3.78622	0.289657	13.0714	4.79664e-39	4.54375e-38
AFF2	75.5653	4.73102	1.12446	4.20738	2.58347e-05	4.44148e-05
AFF3	182.979	-1.49811	0.236788	-6.32682	2.50261e-10	6.26148e-10
AFG3L2	403.791	1.55898	0.145117	10.7429	6.40264e-27	3.94074e-26
AGA	346.952	2.1867	0.161427	13.546	8.36406e-42	8.66139e-41
AGBL2	26.4589	2.3609	0.513084	4.60138	4.19695e-06	7.68801e-06
AGBL3	20.3861	1.63002	0.555583	2.9339	0.00334734	0.00476174
AGBL5	413.085	-2.29361	0.178858	-12.8237	1.20865e-37	1.10229e-36
AGFG1	1811.7	2.27186	0.112817	20.1376	3.45394e-90	1.38643e-88
AGL	340.411	1.16034	0.157015	7.38998	1.46847e-13	4.50989e-13
AGPAT2	287.551	-2.44359	0.176331	-13.858	1.13838e-43	1.2686e-42
AGPAT4	86.2479	-1.35639	0.254705	-5.32534	1.00765e-07	2.08946e-07
AGT	51.4459	-2.58961	0.361007	-7.17331	7.32056e-13	2.15452e-12
AHCTF1	821.637	1.12962	0.121923	9.26504	1.95008e-20	8.81541e-20
AHRR	494.491	-7.97777	0.52703	-15.1372	9.19997e-52	1.32437e-50
AHSA2	217.913	-1.06711	0.249095	-4.28394	1.83609e-05	3.2002e-05
AIDA	700.666	2.52812	0.149876	16.868	7.73309e-64	1.53409e-62
AIF1L	63.2273	5.88923	0.647249	9.09887	9.12777e-20	3.97213e-19
AJUBA	1747.48	1.16524	0.135791	8.5811	9.3973e-18	3.65833e-17
AK1	171.91	1.72818	0.197265	8.76073	1.93997e-18	7.83957e-18
AK3	1126.29	-2.64416	0.110106	-24.0146	1.95723e-127	1.60895e-125
AK4	980.212	8.60719	0.86705	9.92698	3.17731e-23	1.64584e-22
AK5	413.475	-5.95358	0.353456	-16.8439	1.16299e-63	2.29576e-62
AK7	7.40702	3.91506	1.05883	3.69753	0.000217706	0.000345577
AK8	9.52589	4.08151	1.067	3.82523	0.000130649	0.000211727
AK9	38.6371	3.29841	0.421663	7.82237	5.18361e-15	1.73587e-14
AKAP10	560.307	-1.50606	0.154985	-9.71749	2.53952e-22	1.2574e-21
AKAP12	4101.71	1.38337	0.189507	7.29986	2.8806e-13	8.68667e-13
AKAP2	1128.99	6.33172	0.283091	22.3663	8.37142e-111	4.97395e-109
AKAP6	170.891	4.20838	0.334413	12.5844	2.57335e-36	2.23969e-35
AKAP7	19.2017	-1.33888	0.565171	-2.36898	0.0178373	0.0234895
AKR1B1	945.295	-2.00468	0.174475	-11.4898	1.48419e-30	1.05404e-29
AKR1E2	29.4977	1.58264	0.417623	3.78964	0.000150869	0.000242952
AKT3	1859.07	1.4253	0.169309	8.41832	3.81912e-17	1.4342e-16
AKTIP	172.714	1.03068	0.197713	5.21299	1.85821e-07	3.76409e-07
ALAS1	366.53	-1.61176	0.138323	-11.6521	2.23809e-31	1.63391e-30
ALCAM	3353.45	-2.91381	0.182692	-15.9493	2.87995e-57	4.80072e-56
ALDH1A1	721.436	9.56325	0.677222	14.1213	2.80773e-45	3.25903e-44
ALDH1A2	220.48	6.16238	0.472939	13.03	8.2627e-39	7.77796e-38
ALDH1A3	742.007	4.33812	0.220393	19.6835	2.9861e-86	1.06664e-84
ALDH1B1	251.004	-2.95254	0.201708	-14.6377	1.61473e-48	2.10881e-47
ALDH1L2	3508.04	3.75347	0.165857	22.6308	2.15698e-113	1.36253e-111
ALDH2	807.021	2.66968	0.186587	14.308	1.95039e-46	2.37919e-45
ALDH3A2	1090.22	3.96252	0.251888	15.7313	9.22952e-56	1.47697e-54
ALDH3B1	137.055	-3.21296	0.266982	-12.0344	2.34415e-33	1.84247e-32
ALDH5A1	49.5903	3.92216	0.454488	8.62986	6.14293e-18	2.41255e-17
ALDOA	8875.6	1.57524	0.0915512	17.2061	2.38802e-66	5.08174e-65
ALDOC	249.244	3.55504	0.20984	16.9416	2.21835e-64	4.45229e-63
ALG1	76.8052	1.04853	0.267989	3.91257	9.13188e-05	0.000149748
ALG11	250.063	2.31423	0.16396	14.1146	3.08656e-45	3.57576e-44
ALG12	264.502	2.53657	0.171576	14.7839	1.85952e-49	2.51329e-48
ALG14	129.474	2.34216	0.227573	10.2919	7.66436e-25	4.27849e-24
ALG3	168.689	-1.02451	0.205845	-4.97706	6.45577e-07	1.25722e-06
ALK	196.115	5.46764	0.336742	16.2369	2.76739e-59	4.90609e-58
ALKBH4	289.438	2.02468	0.177499	11.4067	3.86992e-30	2.70985e-29
ALKBH7	226.617	1.66891	0.172184	9.69259	3.24208e-22	1.59932e-21
ALMS1	554.549	1.1995	0.134372	8.9267	4.38916e-19	1.83294e-18
ALPK1	103.519	-1.16198	0.269827	-4.3064	1.65931e-05	2.90179e-05
ALPK2	641.362	-3.88386	0.315132	-12.3245	6.68208e-35	5.53473e-34
ALPK3	349.27	6.20667	0.322123	19.268	9.96935e-83	3.20783e-81
ALPL	29.1992	-8.11954	1.23951	-6.55061	5.73028e-11	1.48574e-10
ALS2CL	89.3194	1.69329	0.263968	6.41476	1.41048e-10	3.57897e-10
ALS2CR11	7.27371	-4.4246	1.21391	-3.64493	0.000267466	0.000420835
AMH	6.68503	-5.0764	1.36212	-3.72683	0.000193903	0.000309389
AMIGO1	83.9331	-2.88422	0.282949	-10.1934	2.12111e-24	1.15874e-23
AMIGO2	258.252	-1.32364	0.290772	-4.55214	5.31023e-06	9.64489e-06
AMIGO3	232.662	11.016	1.19175	9.24354	2.38477e-20	1.07239e-19
AMMECR1	216.137	-1.20998	0.176215	-6.8665	6.57949e-12	1.8145e-11
AMN1	21.5568	3.04146	0.527963	5.76074	8.37445e-09	1.88327e-08
AMPD2	651.607	-1.67225	0.166277	-10.057	8.55631e-24	4.55401e-23
AMPD3	348.49	-1.54393	0.235588	-6.55353	5.61932e-11	1.4576e-10
AMPH	44.8968	-8.66522	1.22449	-7.07661	1.47728e-12	4.25801e-12
AMZ1	12.1093	-2.02359	0.714194	-2.83339	0.00460578	0.00647063
ANG	51.6591	2.70516	0.405736	6.66729	2.60572e-11	6.89611e-11
ANGPT1	397.028	-4.37762	0.275895	-15.867	1.07297e-56	1.75926e-55
ANGPT4	16.7009	4.2354	0.995061	4.25642	2.07722e-05	3.59959e-05
ANGPTL1	8.49402	-3.91454	1.02866	-3.80548	0.000141532	0.000228469
ANGPTL2	987.486	-1.5112	0.15595	-9.69024	3.31748e-22	1.63584e-21
ANGPTL5	5.51836	5.90767	1.41088	4.18721	2.82403e-05	4.842e-05
ANGPTL6	16.526	2.96678	0.689126	4.30514	1.66884e-05	2.91718e-05
ANK1	32.5856	-7.51539	1.25547	-5.98612	2.1491e-09	5.04173e-09
ANK3	58.4641	4.17717	0.434081	9.62301	6.39333e-22	3.11795e-21
ANKEF1	23.3785	-7.72365	1.23618	-6.24798	4.15806e-10	1.02622e-09
ANKH	349.458	2.07261	0.162896	12.7235	4.37726e-37	3.90021e-36
ANKIB1	1200.5	-1.01804	0.101781	-10.0022	1.48994e-23	7.80882e-23
ANKMY1	20.9891	-3.1721	0.618189	-5.13129	2.87769e-07	5.74964e-07
ANKRD1	13356.1	12.1921	0.413238	29.5038	2.57557e-191	5.83246e-189
ANKRD10	599.196	-1.27295	0.152524	-8.3459	7.06719e-17	2.61469e-16
ANKRD13B	59.0432	-1.87787	0.376095	-4.99307	5.94264e-07	1.16107e-06
ANKRD13D	120.537	-1.66295	0.25223	-6.59297	4.3111e-11	1.1258e-10
ANKRD23	22.446	4.58199	0.755705	6.0632	1.33436e-09	3.18199e-09
ANKRD27	485.402	1.29041	0.122202	10.5597	4.58246e-26	2.71196e-25
ANKRD28	1389.32	-1.15162	0.148992	-7.72943	1.08031e-14	3.56302e-14
ANKRD29	460.398	4.04485	0.217483	18.5985	3.30558e-77	9.33495e-76
ANKRD31	16.5366	3.52504	0.753492	4.67827	2.89309e-06	5.36261e-06
ANKRD35	79.2609	-3.57392	0.336714	-10.6141	2.56252e-26	1.537e-25
ANKRD37	52.5213	3.64172	0.396483	9.18506	4.1128e-20	1.82416e-19
ANKRD39	35.9114	1.67334	0.372968	4.48656	7.23823e-06	1.30108e-05
ANKRD44	45.9747	-2.8614	0.399646	-7.15984	8.07733e-13	2.37085e-12
ANKRD46	476.128	2.94952	0.15328	19.2427	1.62454e-82	5.21329e-81
ANKRD50	1065.32	-1.43019	0.112656	-12.6952	6.28502e-37	5.57111e-36
ANKRD52	802.162	-1.73547	0.156379	-11.0978	1.2854e-28	8.49526e-28
ANKRD53	12.5881	-2.83072	0.680707	-4.1585	3.20351e-05	5.46765e-05
ANKS1A	790.305	1.41335	0.144409	9.78714	1.27862e-22	6.41822e-22
ANKS3	149.296	-1.31676	0.208614	-6.31194	2.75562e-10	6.8773e-10
ANO2	12.9671	3.47941	0.77337	4.49902	6.8266e-06	1.23096e-05
ANO4	339.53	-6.14114	0.317783	-19.3249	3.31325e-83	1.08059e-81
ANO8	304.161	1.20435	0.180101	6.68711	2.27624e-11	6.05349e-11
ANP32B	273.739	1.04589	0.149544	6.99389	2.67375e-12	7.58457e-12
ANPEP	492.728	-9.21794	0.660532	-13.9553	2.91917e-44	3.30527e-43
ANTXR1	1525.05	-1.49915	0.156927	-9.55316	1.25794e-21	6.03671e-21
ANTXR2	3172.09	1.14288	0.157367	7.26251	3.79985e-13	1.13815e-12
ANXA1	730.934	-1.11945	0.185452	-6.03633	1.57661e-09	3.73601e-09
ANXA13	14.8457	7.3276	1.28216	5.71503	1.09686e-08	2.44285e-08
ANXA3	240.257	4.00172	0.279555	14.3146	1.77404e-46	2.17488e-45
ANXA4	654.925	1.65186	0.142545	11.5883	4.72408e-31	3.39919e-30
ANXA5	4190.37	-4.59332	0.124506	-36.8924	6.12788e-298	5.25335e-295
ANXA6	1255.44	-1.50464	0.17426	-8.63445	5.90097e-18	2.32208e-17
ANXA9	37.5136	-4.35684	0.6526	-6.67612	2.45351e-11	6.50619e-11
AOC2	19.9983	-1.09466	0.523899	-2.08945	0.0366676	0.046629
AP1AR	327.095	1.03872	0.139656	7.43774	1.02423e-13	3.18054e-13
AP1G1	1146.81	-1.19975	0.127648	-9.39895	5.51114e-21	2.55681e-20
AP1M1	849.534	1.39274	0.119825	11.6231	3.14482e-31	2.28061e-30
AP1S1	825.254	-1.09927	0.12188	-9.01926	1.89372e-19	8.09995e-19
AP1S2	716.569	-1.62029	0.189852	-8.53448	1.40783e-17	5.42086e-17
AP1S3	23.1992	2.07681	0.530524	3.91464	9.05386e-05	0.00014851
AP2A1	579.157	-1.11865	0.145484	-7.68912	1.48148e-14	4.84752e-14
AP3M2	343.209	-1.43695	0.221771	-6.4794	9.20873e-11	2.36262e-10
AP3S2	359.948	2.37961	0.167393	14.2157	7.32532e-46	8.72208e-45
AP4S1	214.489	2.87397	0.173894	16.5271	2.34063e-61	4.32854e-60
AP5M1	532.943	1.28481	0.119215	10.7773	4.40602e-27	2.73711e-26
AP5Z1	409.764	-1.91241	0.229539	-8.33151	7.98147e-17	2.93936e-16
APAF1	310.754	-1.02397	0.151074	-6.77796	1.21886e-11	3.30296e-11
APBA1	207.697	-2.04101	0.249106	-8.19333	2.54104e-16	9.12828e-16
APBA2	367.226	-1.85991	0.21192	-8.77647	1.68679e-18	6.83254e-18
APBB1IP	117.51	8.50393	1.06811	7.96167	1.69735e-15	5.85223e-15
APC2	182.484	2.06217	0.225325	9.15202	5.58793e-20	2.46386e-19
APCDD1	18.2743	-5.86732	1.27292	-4.60935	4.03937e-06	7.41066e-06
APCDD1L	234.277	-8.90134	1.04123	-8.54884	1.24328e-17	4.80729e-17
APEH	379.275	-1.03838	0.156694	-6.62678	3.43082e-11	9.00235e-11
APEX2	171.257	-1.05638	0.195374	-5.40694	6.411e-08	1.35181e-07
APH1B	180.736	-2.00045	0.242809	-8.23877	1.73984e-16	6.30864e-16
APITD1	62.0455	2.99195	0.359371	8.32554	8.39472e-17	3.08681e-16
APLP1	259.88	4.70778	0.236768	19.8835	5.65049e-88	2.11268e-86
APMAP	918.908	-5.60057	0.1939	-28.8839	1.90345e-183	3.62622e-181
APOA1BP	477.214	1.79641	0.151562	11.8527	2.08482e-32	1.57569e-31
APOBEC3H	13.7025	6.11618	1.28342	4.76554	1.88352e-06	3.54049e-06
APOD	7.44782	6.08059	1.38098	4.40308	1.06723e-05	1.89145e-05
APOE	946.369	1.67348	0.277499	6.03057	1.63378e-09	3.86833e-09
APOM	56.8644	1.72994	0.300095	5.76464	8.18341e-09	1.84307e-08
APOOL	125.448	2.40258	0.225095	10.6736	1.35229e-26	8.20536e-26
APOPT1	178.937	1.05809	0.188454	5.61459	1.97034e-08	4.30198e-08
APPL2	467.285	-1.27458	0.1801	-7.07707	1.47233e-12	4.24474e-12
APRT	478.488	-2.09237	0.145619	-14.3688	8.12578e-47	1.0075e-45
APTX	288.765	-2.45459	0.224888	-10.9147	9.80064e-28	6.2601e-27
AQP1	584.99	3.92792	0.225871	17.3901	9.8111e-68	2.1606e-66
AQP11	18.2603	-4.58179	0.854444	-5.3623	8.21682e-08	1.716e-07
AQP3	45.5144	-9.11306	1.28498	-7.09201	1.32174e-12	3.82529e-12
AQR	794.141	1.24631	0.162594	7.66519	1.78572e-14	5.80661e-14
AR	30.4826	-7.05618	1.29229	-5.4602	4.75609e-08	1.01085e-07
ARAP2	12.9624	3.29913	0.776825	4.24694	2.16713e-05	3.74944e-05
ARAP3	118.021	-1.01583	0.215508	-4.71367	2.4329e-06	4.53481e-06
AREG	22.5582	-7.78969	1.34402	-5.79581	6.79929e-09	1.53827e-08
AREL1	577.892	-1.37659	0.124244	-11.0798	1.57256e-28	1.03588e-27
ARF1	3704.78	-3.72146	0.121842	-30.5433	6.94219e-205	1.89364e-202
ARFGAP1	1012.29	-1.46985	0.144681	-10.1593	3.01305e-24	1.63262e-23
ARFGEF3	11.6413	2.90665	0.682963	4.25594	2.08172e-05	3.60687e-05
ARG2	156.941	4.22828	0.287973	14.6829	8.29872e-49	1.09572e-47
ARHGAP10	254.012	-1.4833	0.214443	-6.91698	4.61358e-12	1.28683e-11
ARHGAP11A	596.045	-1.12249	0.247188	-4.54104	5.59764e-06	1.01515e-05
ARHGAP17	214.013	-2.98608	0.217738	-13.7141	8.35922e-43	8.99797e-42
ARHGAP18	716.209	1.19054	0.197793	6.01911	1.7538e-09	4.1419e-09
ARHGAP19	107.996	-2.07509	0.273752	-7.58017	3.45099e-14	1.10039e-13
ARHGAP20	82.0238	-8.53851	1.20493	-7.08634	1.37703e-12	3.97923e-12
ARHGAP24	211.154	-1.69111	0.332362	-5.08816	3.61548e-07	7.17239e-07
ARHGAP26	11.6361	-1.47657	0.641222	-2.30274	0.0212934	0.0277529
ARHGAP27	38.0677	1.35067	0.343465	3.93249	8.40692e-05	0.00013839
ARHGAP29	1174.05	1.61457	0.156708	10.3031	6.82582e-25	3.82463e-24
ARHGAP30	27.115	1.06024	0.440308	2.40795	0.0160423	0.0212282
ARHGAP32	384.605	1.45177	0.142152	10.2128	1.73772e-24	9.54514e-24
ARHGAP33	27.7886	-1.6314	0.436434	-3.73802	0.000185472	0.000296488
ARHGAP42	438.4	1.936	0.140703	13.7594	4.47039e-43	4.85114e-42
ARHGAP44	90.7125	2.63022	0.285674	9.20709	3.35077e-20	1.49169e-19
ARHGAP6	251.253	1.86856	0.183626	10.1759	2.54025e-24	1.3808e-23
ARHGDIA	2471.77	2.04394	0.14279	14.3143	1.78043e-46	2.18048e-45
ARHGDIB	101.048	2.54764	0.347632	7.32856	2.32635e-13	7.05251e-13
ARHGEF1	218.96	-1.35052	0.193944	-6.96346	3.32019e-12	9.3564e-12
ARHGEF11	501.435	-1.09795	0.144711	-7.58719	3.26929e-14	1.04495e-13
ARHGEF12	3639.24	-1.66945	0.10922	-15.2852	9.59955e-53	1.42591e-51
ARHGEF18	285.944	2.93359	0.182128	16.1073	2.26762e-58	3.89914e-57
ARHGEF26	20.9062	-3.54067	0.638919	-5.54166	2.99625e-08	6.46082e-08
ARHGEF28	741.46	-4.70436	0.294499	-15.9741	1.93619e-57	3.24556e-56
ARHGEF3	89.0524	-3.85747	0.397899	-9.69459	3.17899e-22	1.56884e-21
ARHGEF37	30.7601	-2.4156	0.439749	-5.49313	3.94863e-08	8.44167e-08
ARHGEF39	42.3094	1.689	0.347653	4.8583	1.18398e-06	2.25737e-06
ARHGEF4	573.743	4.32646	0.219555	19.7056	1.93124e-86	6.93973e-85
ARHGEF5	25.8398	3.49204	0.556904	6.27044	3.60019e-10	8.91652e-10
ARHGEF6	161.022	-1.48772	0.188449	-7.89457	2.9132e-15	9.8769e-15
ARHGEF9	68.4676	-1.65249	0.289745	-5.70325	1.17546e-08	2.60726e-08
ARID3A	222.637	-2.33666	0.214671	-10.8848	1.36161e-27	8.64201e-27
ARID4B	643.706	-1.32434	0.125928	-10.5167	7.23927e-26	4.24454e-25
ARID5A	115.886	-1.47021	0.246348	-5.96802	2.40144e-09	5.62272e-09
ARID5B	6323.7	-1.092	0.136032	-8.02748	9.94922e-16	3.46821e-15
ARIH1	1061.11	1.00393	0.117164	8.5686	1.04748e-17	4.06723e-17
ARL10	1064.56	4.50961	0.159567	28.2615	1.02743e-175	1.7368e-173
ARL14EP	552.036	3.10635	0.164754	18.8544	2.7025e-79	8.00874e-78
ARL15	203.294	1.55081	0.179992	8.61598	6.93433e-18	2.71713e-17
ARL2BP	503.055	4.59117	0.19111	24.0237	1.57366e-127	1.30256e-125
ARL3	182.277	1.24611	0.201205	6.19323	5.89449e-10	1.4388e-09
ARL4A	110.047	-2.19473	0.318398	-6.89303	5.46145e-12	1.51557e-11
ARL4C	603.615	-1.73604	0.26585	-6.53015	6.57019e-11	1.69727e-10
ARL4D	397.105	1.0048	0.161865	6.20763	5.37889e-10	1.31696e-09
ARL5C	8.43587	5.61439	1.35289	4.14994	3.32569e-05	5.66651e-05
ARL6	176.498	1.31305	0.171951	7.6362	2.23719e-14	7.24324e-14
ARL6IP4	72.8377	4.13233	0.401408	10.2946	7.45362e-25	4.16473e-24
ARL8A	142.018	-1.27191	0.194626	-6.53518	6.3533e-11	1.64266e-10
ARMC10	269.728	1.2267	0.178547	6.87042	6.4012e-12	1.76695e-11
ARMC4	10.8665	-3.92813	0.915878	-4.28892	1.79541e-05	3.13159e-05
ARMC9	221.752	-1.77416	0.184835	-9.59857	8.10646e-22	3.93265e-21
ARMCX1	683.223	-2.03869	0.117668	-17.3258	3.00514e-67	6.59374e-66
ARMCX2	957.101	-1.66061	0.171547	-9.68015	3.66177e-22	1.80339e-21
ARMCX5	62.2613	-5.83826	0.760235	-7.67954	1.59655e-14	5.20985e-14
ARMCX6	104.165	-2.66178	0.254267	-10.4684	1.20616e-25	6.99004e-25
ARMT1	781.241	-1.42423	0.143159	-9.94864	2.55663e-23	1.33065e-22
ARNTL	92.0381	-1.14142	0.249542	-4.57404	4.78414e-06	8.72103e-06
ARNTL2	1507.38	1.60352	0.149238	10.7447	6.27747e-27	3.86767e-26
ARPC5	4629.9	1.90674	0.127573	14.9463	1.64713e-50	2.29071e-49
ARPIN	475.171	1.72553	0.144339	11.9547	6.1346e-33	4.76862e-32
ARRB1	64.3071	-4.51322	0.50392	-8.95621	3.36017e-19	1.41653e-18
ARRB2	63.7295	1.64732	0.332807	4.94978	7.4297e-07	1.44034e-06
ARRDC1	154.874	-3.12181	0.265929	-11.7392	8.02039e-32	5.93103e-31
ARRDC2	105.753	1.11369	0.211974	5.25392	1.48895e-07	3.04592e-07
ARRDC4	1778.62	2.60205	0.239049	10.885	1.3587e-27	8.6281e-27
ARSG	103.34	1.55817	0.378155	4.12046	3.78123e-05	6.40903e-05
ARSI	920.801	1.7106	0.146904	11.6443	2.4533e-31	1.78776e-30
ARSJ	1139.68	-4.03606	0.200235	-20.1566	2.3567e-90	9.49165e-89
ARSK	352.554	1.12511	0.179774	6.25846	3.88803e-10	9.61354e-10
ART4	221.235	11.1421	1.19554	9.31979	1.16572e-20	5.33397e-20
ASAH1	1150.39	1.07083	0.129085	8.29554	1.08089e-16	3.95753e-16
ASAP1	672.421	-2.12712	0.126594	-16.8027	2.33127e-63	4.56442e-62
ASAP2	359.426	1.45215	0.158184	9.18017	4.3041e-20	1.90689e-19
ASAP3	192.903	-1.78773	0.260512	-6.86237	6.77286e-12	1.86568e-11
ASB1	432.585	-2.01553	0.159398	-12.6446	1.19801e-36	1.05106e-35
ASB13	286.742	1.09346	0.199987	5.46767	4.55996e-08	9.6985e-08
ASB16	10.1102	-6.65325	1.34373	-4.95133	7.37063e-07	1.42958e-06
ASB3	252.5	3.4731	0.236755	14.6696	1.00961e-48	1.33157e-47
ASCC3	1178.24	-1.33282	0.103785	-12.8422	9.51831e-38	8.71386e-37
ASF1B	170.588	-1.89501	0.336879	-5.62518	1.8531e-08	4.05412e-08
ASIC1	42.1748	-3.01012	0.417361	-7.21226	5.50304e-13	1.63161e-12
ASNS	1494.27	2.60317	0.219922	11.8368	2.5196e-32	1.89951e-31
ASPH	4076.79	-2.99128	0.13062	-22.9006	4.5815e-116	3.07191e-114
ASPHD1	40.768	-3.04761	0.420801	-7.2424	4.40814e-13	1.31608e-12
ASPM	1073.56	-1.76664	0.234796	-7.52412	5.30773e-14	1.67508e-13
ASRGL1	1182.79	12.0175	1.03698	11.589	4.68563e-31	3.37354e-30
ASS1	49.335	-8.05845	1.21478	-6.63366	3.27465e-11	8.60762e-11
ASTN2	10.7376	-3.88339	1.15633	-3.35837	0.000784028	0.00118483
ASUN	171.502	-1.21343	0.192748	-6.29545	3.06517e-10	7.61974e-10
ASXL1	1222.7	-1.55877	0.100462	-15.516	2.70434e-54	4.20979e-53
ATAD3A	385.485	-1.37725	0.160992	-8.55477	1.18102e-17	4.57245e-17
ATF4	7592.78	1.50228	0.13798	10.8877	1.31916e-27	8.38591e-27
ATF5	1714.49	5.26187	0.156673	33.585	2.78217e-247	1.23673e-244
ATF7IP2	4.88804	-4.42031	1.41835	-3.11651	0.00183007	0.00267403
ATG10	24.8704	1.12432	0.443675	2.53409	0.0112738	0.0151776
ATG16L2	46.4239	-2.9064	0.472662	-6.14901	7.79699e-10	1.88783e-09
ATG4B	247.918	-1.97303	0.176514	-11.1777	5.241e-29	3.51018e-28
ATG7	585.932	1.60255	0.148262	10.8089	3.1238e-27	1.95474e-26
ATG9B	16.5823	5.97167	1.25602	4.75446	1.98981e-06	3.73327e-06
ATL1	87.9922	-1.01343	0.241534	-4.19583	2.7187e-05	4.66741e-05
ATMIN	1198.76	-1.07551	0.120645	-8.91467	4.89291e-19	2.03764e-18
ATN1	264.829	-1.12613	0.167475	-6.72413	1.76642e-11	4.73228e-11
ATOH8	301.656	-1.69141	0.165758	-10.2041	1.89995e-24	1.04124e-23
ATOX1	183.907	2.62429	0.183988	14.2634	3.70068e-46	4.47286e-45
ATP10D	652.841	-1.55944	0.122141	-12.7676	2.48862e-37	2.23901e-36
ATP11A	618.157	1.39818	0.160288	8.72294	2.71067e-18	1.08917e-17
ATP11C	520.236	-1.68319	0.155434	-10.829	2.50983e-27	1.57877e-26
ATP13A2	363.75	1.17201	0.172977	6.7755	1.23974e-11	3.35727e-11
ATP1A1	1852.98	1.4921	0.142498	10.471	1.17406e-25	6.81502e-25
ATP1B1	209.606	-1.55791	0.252967	-6.15857	7.34027e-10	1.77976e-09
ATP2A3	28.8216	-5.47288	0.823876	-6.64285	3.07685e-11	8.10392e-11
ATP2B1	1235.12	-2.00627	0.15592	-12.8673	6.87432e-38	6.31259e-37
ATP2B4	3426.9	-1.10334	0.132461	-8.3295	8.1186e-17	2.98802e-16
ATP2C1	648.609	1.01021	0.119173	8.47683	2.3141e-17	8.81431e-17
ATP2C2	5.87381	-2.07719	0.92815	-2.23799	0.0252216	0.0326187
ATP5A1	2398.64	1.16507	0.102671	11.3475	7.62901e-30	5.26226e-29
ATP5E	390.913	3.16414	0.178056	17.7705	1.19552e-70	2.87549e-69
ATP5F1	527.154	1.82938	0.154414	11.8472	2.22445e-32	1.68017e-31
ATP5G1	188.586	-1.04232	0.182957	-5.69708	1.21878e-08	2.70136e-08
ATP5G2	1172.44	1.42588	0.150148	9.49646	2.17147e-21	1.03175e-20
ATP5G3	701.378	2.09627	0.155424	13.4875	1.8539e-41	1.90827e-40
ATP5L	494.582	1.29417	0.136072	9.51094	1.88954e-21	8.99933e-21
ATP5S	86.9717	2.79181	0.272649	10.2396	1.31798e-24	7.26615e-24
ATP6V0A2	612.922	2.52327	0.131612	19.172	6.33737e-82	1.98593e-80
ATP6V0B	569.669	1.05041	0.193642	5.42447	5.81259e-08	1.22908e-07
ATP6V0C	599.588	7.97527	0.408324	19.5317	5.90207e-85	2.0297e-83
ATP6V0D1	1297.61	1.13327	0.1061	10.6812	1.24668e-26	7.5837e-26
ATP6V0D2	10.3357	7.19288	1.32519	5.4278	5.70523e-08	1.20702e-07
ATP6V1C1	398.996	-1.99116	0.173032	-11.5074	1.21008e-30	8.60387e-30
ATP6V1C2	89.5643	3.33541	0.309014	10.7937	3.68583e-27	2.29804e-26
ATP6V1E2	9.41378	-2.35316	0.797906	-2.94917	0.00318629	0.00454557
ATP8A1	80.561	3.35055	0.337789	9.91905	3.44015e-23	1.77969e-22
ATP8B2	1253.66	-1.26248	0.122217	-10.3298	5.16758e-25	2.91043e-24
ATP8B3	18.3925	-6.60487	1.25101	-5.27962	1.29452e-07	2.65951e-07
ATP8B4	6.43183	-2.18676	0.98983	-2.20923	0.0271588	0.0350005
ATP9A	842.854	-3.85751	0.236675	-16.2987	1.00737e-59	1.80185e-58
ATP9B	194.756	1.75154	0.173771	10.0796	6.79973e-24	3.63359e-23
ATPIF1	810.403	2.36641	0.13318	17.7685	1.23916e-70	2.97447e-69
ATRIP	149.362	1.03225	0.18485	5.58426	2.34692e-08	5.09455e-08
ATRNL1	195.471	10.2262	1.20404	8.4932	2.0102e-17	7.67869e-17
ATXN1	867.878	1.7079	0.175458	9.73397	2.1599e-22	1.07298e-21
ATXN3	489.565	2.89954	0.141447	20.4991	2.19401e-93	9.43818e-92
ATXN7L2	62.2094	-1.39219	0.285787	-4.87143	1.10793e-06	2.11742e-06
ATXN7L3B	1769.25	1.45995	0.154239	9.4655	2.92167e-21	1.37459e-20
AUP1	308.533	-1.28723	0.151934	-8.47227	2.40657e-17	9.16069e-17
AURKA	360.991	-2.21824	0.200761	-11.0492	2.21198e-28	1.44598e-27
AURKAIP1	590.309	-1.93468	0.143667	-13.4664	2.46624e-41	2.52128e-40
AURKB	105.225	-2.03023	0.388446	-5.22654	1.72707e-07	3.50733e-07
AURKC	30.136	4.26339	0.634501	6.71929	1.82615e-11	4.88574e-11
AUTS2	175.07	2.4767	0.203098	12.1946	3.32178e-34	2.69196e-33
AVIL	52.8306	-2.46044	0.374356	-6.57246	4.94921e-11	1.28767e-10
AVPI1	624.238	-1.80446	0.132561	-13.6123	3.38418e-42	3.55043e-41
AXIN2	73.9068	1.7285	0.303003	5.70455	1.16652e-08	2.58886e-08
AZI2	400.479	1.45365	0.141674	10.2605	1.06101e-24	5.87375e-24
B3GALNT1	638.324	2.89933	0.209286	13.8535	1.2123e-43	1.34972e-42
B3GALNT2	336.991	2.00089	0.148188	13.5024	1.51316e-41	1.56156e-40
B3GALT2	88.9801	-5.12948	0.569551	-9.00618	2.13361e-19	9.0807e-19
B3GALT4	116.96	1.81675	0.235839	7.70335	1.32542e-14	4.35349e-14
B3GNT4	14.9131	1.40124	0.562464	2.49125	0.0127294	0.0170265
B3GNT5	70.0201	-3.3739	0.333253	-10.1241	4.31871e-24	2.32435e-23
B3GNT8	9.87535	-3.03838	0.836022	-3.63433	0.000278705	0.000437486
B4GALNT1	29.1656	-4.23627	0.640269	-6.61639	3.68066e-11	9.64314e-11
B4GALNT4	26.3833	-5.84647	1.02365	-5.71141	1.12043e-08	2.4921e-08
B4GALT1	1126.4	1.03193	0.106198	9.71704	2.55086e-22	1.26249e-21
B4GALT4	651.874	2.46081	0.126819	19.4041	7.11974e-84	2.36707e-82
B4GALT6	20.6397	3.46386	0.720104	4.81022	1.50762e-06	2.85357e-06
B9D2	97.9094	2.74907	0.29147	9.43176	4.03284e-21	1.88189e-20
BAALC	83.2245	-5.71172	0.537892	-10.6187	2.43895e-26	1.46508e-25
BACE1	1162.21	-1.08873	0.107226	-10.1536	3.19282e-24	1.72769e-23
BACE2	412.251	1.61359	0.277188	5.82129	5.83967e-09	1.32817e-08
BACH1	1994.96	-1.20821	0.0952157	-12.6892	6.79155e-37	6.01566e-36
BACH2	30.7611	-1.34571	0.584448	-2.30253	0.0213053	0.027764
BAD	407.114	1.59386	0.159122	10.0166	1.28804e-23	6.77732e-23
BAG1	730.898	3.31148	0.135103	24.5107	1.13533e-132	1.06455e-130
BAG2	1152.05	1.33968	0.145492	9.20795	3.32428e-20	1.48099e-19
BAG3	901.638	-1.52927	0.171263	-8.92935	4.28526e-19	1.79142e-18
BAHCC1	188.069	-1.64663	0.188282	-8.74555	2.21925e-18	8.93807e-18
BAIAP2L1	362.281	2.27516	0.190583	11.9379	7.51104e-33	5.79727e-32
BAIAP3	29.408	-1.33523	0.392888	-3.39851	0.000677529	0.00103077
BAK1	276.985	1.00726	0.152906	6.58741	4.47572e-11	1.16727e-10
BAMBI	292.557	1.51481	0.167362	9.05106	1.41582e-19	6.09932e-19
BANF1	647.591	2.49954	0.150587	16.5986	7.13039e-62	1.34136e-60
BARD1	181.217	-1.78542	0.236391	-7.55282	4.25933e-14	1.35025e-13
BASP1	5684.63	2.58313	0.145678	17.7317	2.38505e-70	5.67964e-69
BATF3	26.9671	-8.39055	1.23292	-6.80543	1.00751e-11	2.74634e-11
BAX	435.894	-1.16088	0.144932	-8.00985	1.14845e-15	3.99526e-15
BAZ1B	1939.65	-1.32309	0.097039	-13.6346	2.49389e-42	2.62559e-41
BBIP1	163.944	1.65238	0.222417	7.42919	1.09267e-13	3.38519e-13
BBOF1	13.661	-2.17019	0.660864	-3.28387	0.00102392	0.00152697
BBS1	121.298	4.96133	0.440598	11.2605	2.05674e-29	1.39227e-28
BBS10	341.178	-1.3586	0.182853	-7.43004	1.08564e-13	3.36428e-13
BBS2	148.925	-2.37648	0.265655	-8.94574	3.6948e-19	1.55052e-18
BCAM	247.389	1.95029	0.192388	10.1373	3.7745e-24	2.03786e-23
BCAP31	1278.28	1.19007	0.12031	9.89164	4.52545e-23	2.3261e-22
BCAT1	1794.38	-6.52965	0.246428	-26.4972	1.04322e-154	1.36095e-152
BCDIN3D	105.732	2.14221	0.264187	8.1087	5.11622e-16	1.8151e-15
BCHE	152.995	3.75657	0.337421	11.1332	8.6487e-29	5.7476e-28
BCKDHA	51.9343	4.60858	0.492891	9.35011	8.75578e-21	4.02477e-20
BCKDHB	53.9258	-2.11511	0.345817	-6.11626	9.57947e-10	2.30566e-09
BCKDK	784.208	2.11654	0.154171	13.7285	6.85393e-43	7.39756e-42
BCL10	427.528	-1.04863	0.144507	-7.25656	3.97067e-13	1.18813e-12
BCL2	86.9653	-3.57034	0.396002	-9.01595	1.95164e-19	8.33284e-19
BCL2A1	17.7541	2.58225	0.709656	3.63874	0.00027398	0.000430463
BCL2L11	62.9553	1.88764	0.317229	5.95042	2.6746e-09	6.24525e-09
BCL3	67.4036	-2.04305	0.310462	-6.58068	4.68296e-11	1.21972e-10
BCL6B	25.9186	7.31547	1.24738	5.86468	4.49991e-09	1.03147e-08
BCL7C	199.25	1.08735	0.166739	6.52128	6.97108e-11	1.79697e-10
BCO2	16.4957	3.7111	0.774761	4.78999	1.66786e-06	3.14595e-06
BDH1	8.48706	-5.7176	1.3247	-4.31616	1.58769e-05	2.78181e-05
BDH2	33.1158	-8.46897	1.22473	-6.91496	4.67984e-12	1.30258e-11
BECN1	470.754	1.47895	0.134594	10.9882	4.35455e-28	2.81591e-27
BEND5	20.9508	4.38211	0.728334	6.01662	1.781e-09	4.20365e-09
BEND6	52.9973	-1.87484	0.355445	-5.27463	1.33022e-07	2.73051e-07
BEND7	27.8169	-7.07475	1.22925	-5.75534	8.64672e-09	1.94159e-08
BEST1	51.4646	-1.85804	0.361312	-5.1425	2.71112e-07	5.43219e-07
BEX2	79.005	6.20448	0.614044	10.1043	5.28718e-24	2.83289e-23
BFSP1	41.3831	-1.20074	0.495405	-2.42377	0.0153605	0.0203754
BGN	2033.05	3.56474	0.181165	19.6768	3.40934e-86	1.21062e-84
BHLHB9	1203.87	3.43485	0.117901	29.1333	1.3614e-186	2.91778e-184
BHLHE40	1579.27	2.62076	0.195702	13.3915	6.77556e-41	6.80504e-40
BHMT2	5.45014	-5.6001	1.41956	-3.94495	7.98178e-05	0.00013168
BICD1	275.658	1.78071	0.173795	10.246	1.23352e-24	6.80992e-24
BID	722.206	-1.69052	0.115404	-14.6487	1.37247e-48	1.80222e-47
BIN1	297.827	-2.02039	0.22502	-8.97872	2.73936e-19	1.15946e-18
BIRC5	711.493	-1.4248	0.232278	-6.13405	8.56719e-10	2.0693e-09
BLCAP	847.473	-1.16108	0.137329	-8.45474	2.79703e-17	1.05832e-16
BLM	85.2779	-1.70689	0.30876	-5.52822	3.23497e-08	6.9556e-08
BLOC1S1	141.604	-1.35532	0.226863	-5.97419	2.31242e-09	5.41747e-09
BLOC1S3	141.797	1.3289	0.201994	6.5789	4.73945e-11	1.2339e-10
BLOC1S4	333.938	1.27894	0.146208	8.7474	2.18316e-18	8.79567e-18
BLOC1S5	371.464	1.42589	0.14539	9.80732	1.04716e-22	5.27845e-22
BLOC1S6	730.54	-1.14522	0.129575	-8.83825	9.72277e-19	3.98405e-18
BLVRB	308.137	-1.08298	0.153159	-7.07096	1.53862e-12	4.42841e-12
BMF	134.028	-2.42819	0.835923	-2.9048	0.00367492	0.00521229
BMP2	349.345	-4.88644	0.92908	-5.25944	1.44495e-07	2.95944e-07
BMP2K	261.834	1.64466	0.184213	8.92804	4.33609e-19	1.81141e-18
BMP4	355.571	-3.46733	0.660113	-5.25262	1.49948e-07	3.06589e-07
BMPER	2735.18	6.90064	0.176156	39.1735	0	0
BMPR1A	771.109	1.56497	0.130968	11.9492	6.55401e-33	5.08148e-32
BMPR1B	30.2351	-3.99026	0.646441	-6.17266	6.71524e-10	1.63217e-09
BNC1	207.52	1.34784	0.226523	5.95013	2.67926e-09	6.2549e-09
BNIPL	14.3131	2.48894	0.685206	3.6324	0.0002808	0.000440716
BOD1	622.682	-1.1686	0.122103	-9.57067	1.06216e-21	5.11971e-21
BOK	233.653	-2.62849	0.18902	-13.9059	5.83472e-44	6.53859e-43
BOLA1	170.966	1.7786	0.213515	8.33012	8.0758e-17	2.97318e-16
BOLA2B	116.332	10.1021	1.1935	8.46423	2.57842e-17	9.78381e-17
BOLA3	47.8867	2.68923	0.368215	7.30342	2.80542e-13	8.46633e-13
BORCS8	162.756	3.80271	0.29481	12.8989	4.56784e-38	4.21393e-37
BPNT1	120.66	1.10616	0.228876	4.83301	1.34486e-06	2.55437e-06
BRAT1	401.456	-1.4558	0.163496	-8.90419	5.3775e-19	2.23357e-18
BRCC3	141.295	4.06408	0.305279	13.3127	1.95405e-40	1.93502e-39
BRD7	270.787	2.29478	0.164738	13.9299	4.17103e-44	4.68733e-43
BRIP1	116.951	-1.24879	0.236121	-5.28878	1.23135e-07	2.5358e-07
BRMS1L	479.72	3.69545	0.170215	21.7105	1.63402e-104	8.41693e-103
BRPF3	322.599	-1.55331	0.170255	-9.12346	7.27626e-20	3.18257e-19
BRSK1	33.0469	-3.74539	0.54702	-6.84691	7.54643e-12	2.07307e-11
BSCL2	91.3337	2.44363	0.283278	8.62623	6.34048e-18	2.48769e-17
BSG	5720.07	1.19242	0.110339	10.8069	3.19356e-27	1.99631e-26
BSN	10.4159	-2.72038	0.766967	-3.54694	0.000389739	0.000604036
BST1	25.6429	-2.98001	0.507428	-5.87278	4.28543e-09	9.84378e-09
BST2	169.377	6.77372	0.537391	12.6048	1.98638e-36	1.73134e-35
BTBD19	145.124	-1.42218	0.33621	-4.23003	2.33657e-05	4.0304e-05
BTBD3	1495.42	-1.94273	0.12243	-15.8682	1.05294e-56	1.72878e-55
BTF3L4	368.301	1.34407	0.151256	8.8861	6.32934e-19	2.61496e-18
BTG1	1840.25	1.66663	0.177872	9.36988	7.26162e-21	3.35079e-20
BTG3	583.66	1.19664	0.185039	6.46693	1.00015e-10	2.55945e-10
BTRC	293.31	-1.69827	0.172078	-9.8692	5.66127e-23	2.89381e-22
BUB1	170.823	-1.30769	0.28786	-4.54281	5.55085e-06	1.00682e-05
BUB1B	195.37	-1.04121	0.281942	-3.69301	0.000221612	0.000351451
BUD31	135.93	1.90864	0.220759	8.6458	5.34296e-18	2.10941e-17
BZRAP1	59.5907	1.77228	0.362643	4.88711	1.02325e-06	1.96276e-06
BZW1	1996.12	3.13672	0.139959	22.4118	3.02303e-111	1.81412e-109
C10orf10	158.83	-3.94189	0.379135	-10.3971	2.55722e-25	1.45459e-24
C10orf107	10.7332	1.9931	0.677224	2.94304	0.00325006	0.00463104
C10orf11	15.1218	5.07869	0.803119	6.32371	2.55358e-10	6.38767e-10
C10orf35	33.6553	7.45847	1.22319	6.09754	1.07714e-09	2.58298e-09
C11orf1	12.2441	-2.01324	0.763756	-2.63598	0.00838958	0.0114527
C11orf52	37.4175	8.67074	1.2269	7.06716	1.58133e-12	4.54301e-12
C11orf54	162.247	2.07214	0.191861	10.8002	3.43477e-27	2.14374e-26
C11orf63	15.7469	-6.28398	1.27031	-4.94682	7.54343e-07	1.46168e-06
C11orf68	764.962	-2.08427	0.124318	-16.7657	4.34977e-63	8.48877e-62
C11orf71	21.3064	-1.16543	0.457381	-2.54805	0.0108328	0.0146134
C11orf80	17.036	-1.47177	0.51564	-2.85426	0.00431366	0.00607802
C12orf10	216.347	-1.39675	0.185382	-7.53443	4.90458e-14	1.54948e-13
C12orf43	262.312	1.71166	0.164636	10.3967	2.56783e-25	1.45993e-24
C12orf45	106.25	2.80254	0.247008	11.346	7.76592e-30	5.35055e-29
C12orf49	544.76	1.30366	0.129062	10.1011	5.46351e-24	2.92345e-23
C12orf56	27.1905	6.42465	1.08969	5.89585	3.72751e-09	8.59677e-09
C12orf65	188.14	2.49981	0.180528	13.8472	1.32294e-43	1.47018e-42
C12orf66	121.887	1.57363	0.215765	7.29323	3.026e-13	9.11826e-13
C12orf73	60.5168	1.16252	0.309737	3.75323	0.000174569	0.000279618
C12orf75	558.959	-6.45696	0.34307	-18.8211	5.07069e-79	1.49163e-77
C14orf132	1092.98	-1.48193	0.211868	-6.99459	2.6604e-12	7.54848e-12
C14orf159	81.076	-7.41162	1.05317	-7.03741	1.95847e-12	5.60456e-12
C14orf166	893.198	1.43106	0.142999	10.0075	1.41285e-23	7.42104e-23
C14orf37	403.369	2.67685	0.317052	8.44296	3.09402e-17	1.16922e-16
C14orf80	124.055	1.2649	0.236155	5.35626	8.49623e-08	1.77219e-07
C15orf39	260.473	1.45112	0.158728	9.14217	6.12103e-20	2.69101e-19
C15orf48	9.18758	4.75112	1.17221	4.05312	5.05385e-05	8.48696e-05
C15orf52	502.158	-1.6038	0.205252	-7.8138	5.54884e-15	1.85559e-14
C15orf57	256.414	3.58807	0.198432	18.0821	4.41236e-73	1.12675e-71
C15orf59	82.9225	3.74677	0.301826	12.4137	2.20346e-35	1.84937e-34
C15orf65	17.1204	-3.6119	0.722793	-4.99714	5.8187e-07	1.13814e-06
C16orf45	272.408	-7.54233	0.524198	-14.3883	6.12773e-47	7.62915e-46
C16orf59	55.6629	-1.33493	0.438565	-3.04386	0.00233564	0.00337739
C16orf70	128.213	-2.05453	0.209116	-9.82487	8.79839e-23	4.45187e-22
C16orf71	35.4914	1.28623	0.363482	3.53864	0.000402188	0.000622767
C16orf72	2689.38	1.59777	0.0911935	17.5207	9.96494e-69	2.25659e-67
C16orf74	60.1906	1.28326	0.30741	4.17442	2.98748e-05	5.11348e-05
C16orf86	16.0303	-2.3455	0.564246	-4.15688	3.22621e-05	5.50326e-05
C16orf90	32.4075	7.32532	1.22141	5.99743	2.0047e-09	4.71218e-09
C17orf100	17.9279	-2.82701	0.557988	-5.06643	4.0535e-07	8.01089e-07
C17orf107	26.7025	3.47887	0.532985	6.52715	6.7033e-11	1.7298e-10
C17orf49	133.191	5.74792	0.448597	12.8131	1.38457e-37	1.25701e-36
C17orf50	6.68392	5.93535	1.38246	4.29333	1.76014e-05	3.07141e-05
C17orf53	51.2886	-2.59919	0.399252	-6.51014	7.50815e-11	1.93375e-10
C17orf67	14.4902	-7.50575	1.34019	-5.6005	2.13736e-08	4.65902e-08
C17orf75	193.035	1.52358	0.175167	8.69788	3.38157e-18	1.3497e-17
C17orf96	60.0331	3.00324	0.352514	8.51951	1.60223e-17	6.1477e-17
C18orf21	179.886	1.57095	0.188489	8.33443	7.787e-17	2.8695e-16
C18orf32	305.633	5.93453	0.275461	21.544	6.02963e-103	3.04066e-101
C18orf8	300.546	2.21648	0.169741	13.058	5.72401e-39	5.41368e-38
C19orf18	9.91885	1.7244	0.718429	2.40024	0.0163842	0.0216567
C19orf24	264.604	-1.07703	0.163806	-6.57501	4.86485e-11	1.266e-10
C19orf25	1579.91	2.88005	0.118718	24.2596	5.23539e-130	4.62023e-128
C19orf43	1007.96	-1.86214	0.10604	-17.5608	4.92058e-69	1.12275e-67
C19orf53	932.342	-2.8163	0.114575	-24.5805	2.04064e-133	1.92849e-131
C19orf54	63.6848	1.66225	0.346562	4.79641	1.61535e-06	3.04977e-06
C19orf57	12.3396	1.63293	0.636659	2.56485	0.0103221	0.0139559
C19orf66	90.6472	-1.36894	0.256178	-5.3437	9.10685e-08	1.89593e-07
C19orf68	80.9122	-1.01293	0.241845	-4.18833	2.8101e-05	4.81881e-05
C19orf71	196.269	1.08348	0.220012	4.92462	8.4524e-07	1.6307e-06
C1D	114.863	1.87081	0.225514	8.29575	1.07899e-16	3.95179e-16
C1QL1	21.7627	-5.21484	0.878362	-5.937	2.90277e-09	6.75307e-09
C1QTNF3	167.403	7.08506	1.59836	4.4327	9.30619e-06	1.65716e-05
C1QTNF5	22.7818	5.22426	0.82974	6.29626	3.04908e-10	7.58447e-10
C1QTNF6	399.445	2.83706	0.208965	13.5767	5.5043e-42	5.7346e-41
C1QTNF7	8.68258	-1.92111	0.923216	-2.08089	0.0374436	0.0475352
C1R	2242.53	-1.65319	0.284905	-5.8026	6.52932e-09	1.47961e-08
C1orf105	15.718	6.40383	1.27988	5.00345	5.63142e-07	1.10204e-06
C1orf106	41.8626	6.65245	1.09525	6.07393	1.24814e-09	2.98292e-09
C1orf116	81.6085	6.4316	0.643543	9.99406	1.61819e-23	8.45514e-23
C1orf122	495.538	1.22928	0.157693	7.79538	6.42169e-15	2.1445e-14
C1orf131	108.086	1.84586	0.265569	6.9506	3.63725e-12	1.0224e-11
C1orf167	52.3326	8.97021	1.20772	7.42737	1.10775e-13	3.43013e-13
C1orf216	332.161	-1.78913	0.165512	-10.8097	3.09706e-27	1.94003e-26
C1orf226	138.647	3.81302	0.284332	13.4105	5.25131e-41	5.30524e-40
C1orf27	111.648	1.4637	0.219959	6.65444	2.84377e-11	7.5079e-11
C1orf43	1345.7	-1.57657	0.116061	-13.5839	4.98724e-42	5.20948e-41
C1orf56	35.515	-4.06868	0.528864	-7.69324	1.43455e-14	4.6991e-14
C1orf74	104.613	1.02305	0.279409	3.66147	0.000250775	0.000395455
C2	42.0166	4.09474	0.701698	5.83548	5.36369e-09	1.22316e-08
C20orf194	486.706	-1.71411	0.162172	-10.5697	4.11941e-26	2.44154e-25
C20orf196	35.1331	1.81036	0.459515	3.93971	8.15791e-05	0.000134493
C20orf24	370.183	2.93847	0.179931	16.3311	5.93309e-60	1.0692e-58
C20orf96	28.7269	1.20954	0.38896	3.10967	0.00187295	0.00273303
C21orf2	139.537	2.07049	0.213806	9.68398	3.52724e-22	1.73785e-21
C21orf33	201.759	11.2048	1.18905	9.42327	4.37248e-21	2.03563e-20
C21orf59	175.202	2.12486	0.196638	10.8059	3.22621e-27	2.01566e-26
C22orf23	512.221	4.6896	0.211007	22.2249	1.97243e-109	1.13813e-107
C22orf29	272.034	-1.00507	0.152438	-6.59331	4.30132e-11	1.12349e-10
C22orf39	389.856	2.86926	0.158976	18.0484	8.11696e-73	2.05962e-71
C2CD2	607.118	-1.59269	0.205948	-7.73343	1.04686e-14	3.4565e-14
C2CD2L	136.84	1.09361	0.193757	5.64424	1.65917e-08	3.6398e-08
C2orf42	116.442	-1.02727	0.23865	-4.3045	1.67364e-05	2.92473e-05
C2orf68	286.152	1.04263	0.173042	6.02531	1.68788e-09	3.98934e-09
C2orf81	51.4385	2.55414	0.376473	6.7844	1.16571e-11	3.16393e-11
C2orf82	3.56916	-3.44004	1.47756	-2.32818	0.0199026	0.0260492
C3	78.1987	4.43915	0.507128	8.75351	2.06814e-18	8.34626e-18
C3orf14	34.7576	-1.46853	0.442863	-3.31599	0.000913192	0.00136984
C3orf18	238.964	-1.61006	0.174671	-9.21769	3.03578e-20	1.357e-19
C3orf52	38.6007	-2.76355	0.43353	-6.37453	1.8352e-10	4.62928e-10
C3orf67	55.7894	2.13503	0.297921	7.16644	7.69758e-13	2.26105e-12
C3orf70	45.0532	2.09891	0.408101	5.14312	2.70218e-07	5.41701e-07
C4A	79.0034	8.58714	1.23885	6.93151	4.16357e-12	1.1651e-11
C4orf32	96.9979	4.5523	0.299876	15.1806	4.75394e-52	6.92437e-51
C4orf33	69.8633	3.42467	0.321359	10.6569	1.61977e-26	9.80359e-26
C4orf36	8.07237	-3.24458	1.21363	-2.67344	0.00750771	0.0103025
C4orf48	21.2321	1.5961	0.466369	3.4224	0.000620717	0.000947094
C5	14.5725	-3.93121	0.795895	-4.93936	7.83793e-07	1.51556e-06
C5AR2	58.9128	8.73876	1.06454	8.20897	2.231e-16	8.0434e-16
C5orf51	313.694	-1.06656	0.15052	-7.08585	1.38196e-12	3.99188e-12
C6orf132	86.3165	-3.15073	0.284619	-11.07	1.75425e-28	1.15241e-27
C6orf136	92.2573	1.71679	0.237813	7.21908	5.23406e-13	1.55378e-12
C6orf141	18.9656	6.19125	1.26727	4.8855	1.03167e-06	1.97861e-06
C6orf163	24.9943	2.66033	0.516781	5.14788	2.63442e-07	5.28734e-07
C6orf52	24.0994	2.79433	0.544173	5.13501	2.82124e-07	5.64435e-07
C6orf89	737.561	-1.70588	0.147779	-11.5435	7.9616e-31	5.69459e-30
C7orf25	134.862	4.36228	0.291583	14.9607	1.32599e-50	1.85052e-49
C7orf31	18.0492	-1.0458	0.477916	-2.18824	0.0286521	0.0368537
C7orf49	224.91	-1.55621	0.180083	-8.64165	5.54087e-18	2.18468e-17
C8G	52.9872	4.69836	0.550996	8.52703	1.50153e-17	5.76868e-17
C8orf33	427.863	1.11363	0.156355	7.12245	1.06024e-12	3.08484e-12
C8orf37	149.467	2.02924	0.271352	7.47826	7.53115e-14	2.35633e-13
C8orf4	520.382	5.86543	0.247114	23.7357	1.54301e-124	1.20255e-122
C9orf116	28.3933	-4.63478	0.655539	-7.07018	1.54731e-12	4.4513e-12
C9orf131	14.3491	1.1433	0.544226	2.10079	0.0356593	0.0453996
C9orf142	109.951	-1.37706	0.243492	-5.65545	1.55434e-08	3.41921e-08
C9orf16	737.644	2.60002	0.132563	19.6135	1.18588e-85	4.13749e-84
C9orf3	567.532	1.2388	0.252088	4.91416	8.91618e-07	1.71604e-06
C9orf40	234.803	1.13963	0.225533	5.05306	4.34794e-07	8.57866e-07
C9orf72	157.252	2.48716	0.229791	10.8236	2.66234e-27	1.67295e-26
C9orf78	446.239	1.7915	0.142104	12.607	1.93186e-36	1.68504e-35
C9orf84	10.9056	-3.52685	0.835123	-4.22315	2.40913e-05	4.15018e-05
C9orf85	103.761	1.82225	0.302981	6.0144	1.80549e-09	4.25977e-09
CA12	101.992	-6.2305	0.707101	-8.81133	1.23672e-18	5.04354e-18
CA2	64.1049	9.41632	1.21005	7.78179	7.15074e-15	2.38133e-14
CA3	13.1811	6.68498	1.30168	5.13565	2.8117e-07	5.62715e-07
CA5A	46.5696	9.2075	1.2244	7.52004	5.47593e-14	1.7268e-13
CA5B	14.4849	-4.38025	0.955082	-4.58626	4.51266e-06	8.25121e-06
CA9	62.613	3.64619	0.391953	9.30261	1.37037e-20	6.25132e-20
CAB39L	183.28	-1.18524	0.228379	-5.18977	2.10552e-07	4.24999e-07
CABIN1	819.096	-1.64565	0.155443	-10.5869	3.4288e-26	2.04332e-25
CABLES2	154.517	-1.02248	0.195	-5.24349	1.57569e-07	3.21242e-07
CABP1	8.18715	6.96845	1.34761	5.17098	2.32871e-07	4.68946e-07
CABP7	9.26904	3.54067	0.889914	3.97866	6.93048e-05	0.000114889
CACHD1	106.434	-1.83078	0.262601	-6.9717	3.13124e-12	8.84469e-12
CACNB1	58.1988	-2.27601	0.313363	-7.26317	3.78124e-13	1.13286e-12
CACNB2	31.1191	2.10844	0.463434	4.5496	5.37485e-06	9.7593e-06
CACNB3	569.841	-2.61346	0.248095	-10.5341	6.01521e-26	3.53721e-25
CACYBP	1196.4	2.74123	0.146655	18.6918	5.77704e-78	1.67075e-76
CADM1	1266.31	1.06125	0.184143	5.76317	8.25484e-09	1.85776e-08
CADPS2	139.193	3.07203	0.239437	12.8302	1.11028e-37	1.01412e-36
CALCOCO2	1246.99	1.85619	0.143569	12.9289	3.09071e-38	2.86224e-37
CALCRL	38.1408	2.20674	0.417417	5.28666	1.2457e-07	2.56404e-07
CALD1	34685.8	2.45325	0.0988037	24.8296	4.29762e-136	4.15968e-134
CALHM2	324.466	1.12913	0.187307	6.02825	1.65744e-09	3.92127e-09
CALM1	6318.8	2.41126	0.127256	18.9481	4.57911e-80	1.38784e-78
CALM2	6892.73	-1.69676	0.164945	-10.2869	8.07707e-25	4.5026e-24
CALM3	2006.02	-1.23625	0.113069	-10.9336	7.96336e-28	5.0974e-27
CAMK1	19.8447	1.27162	0.559835	2.27142	0.0231215	0.0300102
CAMK1D	26.3506	-2.23484	0.599795	-3.72602	0.00019453	0.000310348
CAMK1G	18.0669	-4.91343	0.981135	-5.0079	5.50262e-07	1.07772e-06
CAMK2A	6.90652	-2.89387	1.05439	-2.74459	0.00605871	0.0084046
CAMK2D	783.395	-1.24896	0.113666	-10.988	4.36568e-28	2.82159e-27
CAMK2N1	295.932	-3.03374	0.200008	-15.1681	5.75259e-52	8.31838e-51
CAMK2N2	12.35	2.23555	0.709239	3.15203	0.00162138	0.00238011
CAMK4	52.1832	-8.07284	1.20711	-6.68777	2.26604e-11	6.02772e-11
CAMKK1	128.239	1.14295	0.22355	5.11274	3.17516e-07	6.32923e-07
CAMSAP3	5.49497	2.68223	1.00335	2.67329	0.00751112	0.010305
CAND2	187.078	-1.87941	0.222891	-8.43198	3.39852e-17	1.28026e-16
CAP2	195.178	-10.0542	1.19133	-8.43948	3.18747e-17	1.20264e-16
CAPG	620.923	1.30115	0.138659	9.38377	6.3655e-21	2.94294e-20
CAPN2	6218.01	-2.06318	0.153845	-13.4107	5.23189e-41	5.29453e-40
CAPN5	150.764	-3.7158	0.272706	-13.6257	2.81778e-42	2.95879e-41
CAPRIN1	3569.15	-1.4678	0.107114	-13.7031	9.72205e-43	1.04182e-41
CAPRIN2	218.354	-1.69983	0.22406	-7.58648	3.28702e-14	1.05034e-13
CAPS	15.0217	-1.9489	0.69946	-2.78629	0.00533145	0.00744307
CAPZA2	1904.46	1.34006	0.108788	12.3181	7.24174e-35	5.98591e-34
CAPZB	1529.04	1.05671	0.126549	8.35019	6.81521e-17	2.52301e-16
CARD10	150.112	-2.07348	0.22291	-9.30187	1.37998e-20	6.29276e-20
CARD14	40.3651	1.43122	0.390502	3.66508	0.000247264	0.000390277
CARD19	158.371	-1.15474	0.185367	-6.22947	4.68023e-10	1.15036e-09
CARD6	555.55	1.79823	0.152697	11.7765	5.15904e-32	3.8435e-31
CARD8	43.8973	-7.91439	1.20893	-6.54662	5.88553e-11	1.52467e-10
CARD9	85.0305	-4.5262	0.355043	-12.7483	3.18559e-37	2.8575e-36
CARNMT1	417.109	-2.14201	0.134684	-15.9039	5.95109e-57	9.85172e-56
CARNS1	88.3798	2.74198	0.427256	6.41765	1.3839e-10	3.51228e-10
CARS2	248.697	-2.29274	0.215603	-10.6341	2.06835e-26	1.24558e-25
CASC3	873.714	-1.19727	0.110444	-10.8406	2.21081e-27	1.39287e-26
CASC5	690.298	-1.00242	0.222736	-4.50051	6.77913e-06	1.22277e-05
CASK	367.747	1.5141	0.146439	10.3395	4.67051e-25	2.63171e-24
CASKIN1	37.9715	2.21718	0.393004	5.64162	1.68457e-08	3.69216e-08
CASP10	66.7181	4.43184	0.381415	11.6195	3.28169e-31	2.37556e-30
CASP9	204.097	3.28093	0.216878	15.128	1.05903e-51	1.52039e-50
CASS4	142.354	-5.71715	0.44847	-12.7481	3.19381e-37	2.86274e-36
CASZ1	32.4183	3.78822	0.573897	6.60086	4.08778e-11	1.06888e-10
CAT	236.337	-9.66208	1.03258	-9.35723	8.18571e-21	3.76562e-20
CATIP	10.6287	6.67748	1.30385	5.12136	3.03345e-07	6.05278e-07
CATSPER2	28.952	2.33552	0.443317	5.26829	1.37702e-07	2.82465e-07
CATSPER3	26.232	2.46283	0.504883	4.87801	1.07161e-06	2.05193e-06
CATSPERB	26.3918	8.00985	1.23433	6.48925	8.62664e-11	2.21659e-10
CATSPERD	20.0207	4.48308	0.834643	5.37125	7.81914e-08	1.63722e-07
CAV1	10798.1	-1.36243	0.192647	-7.07219	1.5251e-12	4.39056e-12
CAV2	1598.09	-2.11657	0.130339	-16.239	2.67458e-59	4.74857e-58
CBARP	63.3267	-1.98879	0.313708	-6.33962	2.30326e-10	5.77595e-10
CBL	602.703	-1.2438	0.144072	-8.63315	5.96837e-18	2.34783e-17
CBLB	309.906	2.42945	0.240863	10.0864	6.34265e-24	3.39236e-23
CBLN3	19.497	-1.0528	0.506742	-2.07759	0.0377473	0.0478954
CBS	87.4476	6.6936	0.683404	9.7945	1.18887e-22	5.97522e-22
CBX3	437.409	-1.49544	0.152489	-9.80689	1.05163e-22	5.29654e-22
CBX6	3367.61	-1.5356	0.099417	-15.4461	8.02001e-54	1.23247e-52
CBX7	166.758	1.74352	0.218097	7.99422	1.30396e-15	4.51532e-15
CBX8	125.087	1.2838	0.201777	6.36246	1.98548e-10	4.99471e-10
CBY1	233.617	1.30555	0.158514	8.2362	1.77763e-16	6.44176e-16
CC2D2A	190.489	-1.59369	0.235867	-6.75676	1.41113e-11	3.80763e-11
CCBE1	511.156	-1.2443	0.23783	-5.23191	1.67765e-07	3.40985e-07
CCBL2	96.8753	-3.49632	0.313654	-11.1471	7.39941e-29	4.92829e-28
CCDC102B	100.771	-2.83517	0.337381	-8.40345	4.33559e-17	1.62257e-16
CCDC107	73.9528	2.17292	0.267988	8.10827	5.13442e-16	1.82102e-15
CCDC109B	377.596	2.88552	0.200681	14.3787	7.04553e-47	8.75368e-46
CCDC112	80.9148	-1.54063	0.261258	-5.89696	3.70249e-09	8.54399e-09
CCDC113	15.4214	-2.59212	0.784004	-3.30625	0.00094553	0.00141605
CCDC114	23.1595	6.81915	1.24228	5.48921	4.03725e-08	8.62497e-08
CCDC12	245.945	-1.47395	0.182482	-8.07723	6.62518e-16	2.33526e-15
CCDC120	55.9636	-1.50249	0.389158	-3.86087	0.000112983	0.000183892
CCDC127	406.173	2.70825	0.148886	18.19	6.18845e-74	1.62881e-72
CCDC13	11.285	1.68304	0.722092	2.33079	0.0197645	0.0258741
CCDC130	163.56	-1.73378	0.187231	-9.2601	2.04235e-20	9.22207e-20
CCDC136	136.316	-3.78504	0.326401	-11.5963	4.3031e-31	3.10372e-30
CCDC138	60.0802	2.13114	0.338552	6.29488	3.07633e-10	7.64591e-10
CCDC14	482.612	-3.22348	0.213441	-15.1024	1.56048e-51	2.22433e-50
CCDC142	127.759	-1.23821	0.220472	-5.61616	1.95248e-08	4.26455e-08
CCDC146	23.7058	-1.71134	0.580522	-2.94794	0.00319901	0.00456209
CCDC15	84.0222	2.21004	0.291032	7.5938	3.10663e-14	9.95614e-14
CCDC150	26.0428	-1.11611	0.405943	-2.74942	0.00597016	0.00828751
CCDC152	574.712	7.03731	0.302435	23.2688	9.16969e-120	6.6298e-118
CCDC157	66.4163	1.51793	0.276909	5.48168	4.21317e-08	8.9848e-08
CCDC158	106.567	5.85803	0.498993	11.7397	7.97721e-32	5.90275e-31
CCDC159	21.3559	-1.32194	0.492573	-2.68374	0.00728048	0.0100103
CCDC168	34.6297	3.02651	0.470941	6.42653	1.30551e-10	3.31893e-10
CCDC17	14.1021	-2.81638	0.671179	-4.19616	2.71474e-05	4.66127e-05
CCDC170	28.6326	1.15452	0.43382	2.66129	0.00778424	0.010653
CCDC171	50.7958	1.27011	0.298997	4.24792	2.15768e-05	3.73417e-05
CCDC18	71.5423	-1.60924	0.265136	-6.06951	1.28305e-09	3.06268e-09
CCDC181	13.5937	2.48864	0.63679	3.90811	9.30225e-05	0.000152396
CCDC188	4.00058	-4.76306	1.51562	-3.14264	0.00167432	0.00245483
CCDC189	29.412	3.60686	0.499395	7.22246	5.10541e-13	1.51709e-12
CCDC191	81.9658	2.04003	0.272362	7.49014	6.8801e-14	2.15769e-13
CCDC24	42.7567	-1.27248	0.462772	-2.74969	0.00596514	0.0082815
CCDC27	10.736	2.19465	0.813518	2.69773	0.00698145	0.00961461
CCDC28B	143.141	1.46791	0.19477	7.53665	4.82216e-14	1.52465e-13
CCDC30	12.0793	3.37582	0.880536	3.83382	0.000126166	0.000204766
CCDC34	75.4646	1.4343	0.241008	5.95127	2.66063e-09	6.21384e-09
CCDC36	5.85599	-5.60479	1.38753	-4.0394	5.35885e-05	8.97404e-05
CCDC40	84.6906	1.83007	0.321648	5.68965	1.27302e-08	2.81846e-08
CCDC51	206.683	-1.34734	0.220565	-6.10856	1.00536e-09	2.41713e-09
CCDC57	151.474	-2.08139	0.245102	-8.49194	2.03219e-17	7.76023e-17
CCDC62	84.0586	6.29208	0.561036	11.2151	3.43754e-29	2.31393e-28
CCDC64	76.1864	4.57815	0.448741	10.2022	1.93816e-24	1.0617e-23
CCDC65	22.7236	-1.70342	0.471144	-3.61551	0.000299761	0.000468699
CCDC68	279.26	-4.09707	0.645306	-6.34904	2.16658e-10	5.44117e-10
CCDC73	107.078	9.61268	1.19577	8.03891	9.06389e-16	3.16419e-15
CCDC77	65.6732	-1.59249	0.353872	-4.50019	6.78914e-06	1.22439e-05
CCDC78	95.6696	-1.88385	0.277922	-6.77833	1.21569e-11	3.29511e-11
CCDC80	28640.1	3.83664	0.227631	16.8547	9.69765e-64	1.91748e-62
CCDC84	65.9556	-1.16996	0.314625	-3.71859	0.000200337	0.000319019
CCDC85A	134.906	10.4738	1.20351	8.70271	3.24062e-18	1.29603e-17
CCDC85B	1215.13	-2.90653	0.166272	-17.4806	2.01218e-68	4.50562e-67
CCDC87	21.9736	1.23188	0.480225	2.56522	0.0103109	0.0139439
CCDC89	30.1278	-2.74927	0.464746	-5.91563	3.30602e-09	7.66444e-09
CCDC92	224.913	-1.02291	0.177712	-5.75597	8.61468e-09	1.93476e-08
CCDC96	23.8325	-1.45516	0.456047	-3.19082	0.00141869	0.00209187
CCDC97	317.338	1.05062	0.15698	6.69266	2.19143e-11	5.83184e-11
CCER2	4.94256	3.85367	1.42071	2.71249	0.0066779	0.00922091
CCIN	7.92035	-4.7251	1.20633	-3.91692	8.96858e-05	0.000147151
CCNB1	444.569	-1.34008	0.239943	-5.58499	2.33713e-08	5.07605e-08
CCNB1IP1	158.362	-1.54995	0.195066	-7.94578	1.9298e-15	6.62513e-15
CCNB2	119.727	-1.57079	0.300111	-5.23404	1.65846e-07	3.37198e-07
CCNB3	13.406	5.25786	1.17032	4.49266	7.03383e-06	1.26681e-05
CCNC	358.889	-1.11886	0.153778	-7.27582	3.44321e-13	1.03469e-12
CCND1	9203.79	-2.41864	0.539881	-4.47995	7.46593e-06	1.3396e-05
CCND2	1229.98	3.30039	0.274224	12.0354	2.31573e-33	1.82132e-32
CCND3	1862.5	1.76047	0.223737	7.8685	3.58928e-15	1.2128e-14
CCNE2	63.4396	1.71408	0.407505	4.20628	2.59608e-05	4.46154e-05
CCNF	195.437	-1.02817	0.296354	-3.4694	0.000521616	0.000800362
CCNI2	6.96615	3.26299	0.911684	3.57908	0.000344802	0.000536815
CCNJL	47.6171	-3.58638	0.449097	-7.98576	1.39655e-15	4.83036e-15
CCNL1	693.281	-1.50764	0.133331	-11.3075	1.20515e-29	8.21364e-29
CCNL2	1095.63	-1.71243	0.182905	-9.36243	7.79261e-21	3.59028e-20
CCNYL1	672.969	3.39559	0.147481	23.0239	2.68618e-117	1.85285e-115
CCPG1	1056.87	3.81609	0.134129	28.4508	4.76087e-178	8.40294e-176
CCT5	1498.13	1.20343	0.137515	8.75127	2.10971e-18	8.50544e-18
CCZ1	65.2798	5.64769	0.564745	10.0004	1.51736e-23	7.94216e-23
CD164	7065.52	1.21005	0.095927	12.6143	1.76111e-36	1.54058e-35
CD180	12.3838	7.37721	1.2929	5.70595	1.15695e-08	2.57e-08
CD19	12.6552	5.94309	1.28588	4.62182	3.80391e-06	6.98937e-06
CD200	835.984	10.151	0.731044	13.8856	7.74416e-44	8.65413e-43
CD244	17.3892	7.4136	1.25557	5.90458	3.53552e-09	8.17283e-09
CD248	2579.37	-2.30248	0.19273	-11.9467	6.75939e-33	5.23057e-32
CD274	31.51	-3.71695	0.554761	-6.70009	2.08291e-11	5.55288e-11
CD2AP	1227.68	1.34371	0.113459	11.8431	2.33748e-32	1.76332e-31
CD320	249.309	-1.91588	0.175806	-10.8977	1.18241e-27	7.52456e-27
CD37	21.5977	-4.17312	0.746973	-5.5867	2.31422e-08	5.02811e-08
CD3EAP	343.612	5.713	0.303181	18.8435	3.32041e-79	9.81566e-78
CD40	57.4055	6.44349	0.765121	8.42152	3.71621e-17	1.39687e-16
CD44	10056.2	-1.3199	0.1984	-6.65275	2.87669e-11	7.59148e-11
CD47	1688.25	-1.38807	0.119368	-11.6285	2.95316e-31	2.14551e-30
CD58	206.693	3.64391	0.226442	16.092	2.90376e-58	4.98583e-57
CD59	6845.08	-1.96735	0.169472	-11.6087	3.72164e-31	2.68755e-30
CD68	81.3475	7.31954	0.865186	8.46007	2.6721e-17	1.01265e-16
CD72	11.0974	1.79647	0.676853	2.65415	0.00795081	0.010876
CD74	27.2638	-1.04415	0.389295	-2.68217	0.00731458	0.0100561
CD81	3674.35	1.19515	0.119191	10.0271	1.15835e-23	6.10833e-23
CD82	330.653	-1.17153	0.241473	-4.85161	1.22465e-06	2.33343e-06
CD83	46.3726	-1.42062	0.390759	-3.63553	0.000277408	0.00043562
CD93	14.8045	2.64125	0.628786	4.20055	2.66264e-05	4.57444e-05
CD99L2	1114.83	-2.63679	0.118852	-22.1855	4.74223e-109	2.69745e-107
CDA	4.62807	-3.29944	1.31605	-2.50707	0.0121736	0.0163194
CDC123	162.374	-1.30922	0.182923	-7.15725	8.23097e-13	2.41359e-12
CDC14A	104.156	1.15229	0.221059	5.21256	1.86251e-07	3.77217e-07
CDC16	297.914	-1.26737	0.157182	-8.06309	7.43921e-16	2.6084e-15
CDC20	264.285	-1.21342	0.227428	-5.33542	9.53212e-08	1.98069e-07
CDC25B	570.861	-2.18246	0.140925	-15.4867	4.26623e-54	6.59836e-53
CDC26	31.4891	3.7544	0.549059	6.83788	8.03728e-12	2.20437e-11
CDC42BPG	61.6527	5.28741	0.573348	9.22199	2.91633e-20	1.30701e-19
CDC42EP5	139.197	-1.86178	0.193996	-9.59704	8.22736e-22	3.98969e-21
CDC45	20.3367	-1.66282	0.547066	-3.03952	0.00236954	0.00342298
CDC5L	658.273	1.25794	0.132144	9.51947	1.74065e-21	8.30669e-21
CDC7	273.292	1.32264	0.204363	6.472	9.67133e-11	2.47707e-10
CDC73	306.276	-1.16207	0.149701	-7.76262	8.31945e-15	2.7621e-14
CDCA3	243.367	1.37792	0.204612	6.7343	1.64722e-11	4.42378e-11
CDCA5	229.599	-1.26714	0.268874	-4.71276	2.44387e-06	4.55385e-06
CDCA7	117.134	-2.00185	0.272799	-7.33819	2.16503e-13	6.57176e-13
CDCA7L	413.605	2.00157	0.184035	10.876	1.49978e-27	9.50386e-27
CDCA8	240.665	-1.48255	0.250832	-5.91054	3.40987e-09	7.89757e-09
CDCP1	656.909	-2.63698	0.27299	-9.65962	4.47501e-22	2.19579e-21
CDH10	14.5614	4.15262	0.892884	4.6508	3.30656e-06	6.10356e-06
CDH11	3242.04	1.50396	0.152929	9.83436	8.00754e-23	4.06027e-22
CDH13	10870.6	5.89214	0.197372	29.853	8.01718e-196	1.92444e-193
CDH2	4421.08	3.70154	0.127068	29.1304	1.4788e-186	3.11377e-184
CDH23	81.4535	4.02486	0.42009	9.58096	9.61475e-22	4.64745e-21
CDH24	106.503	-2.11765	0.25775	-8.21592	2.10544e-16	7.6067e-16
CDH3	31.6417	8.46075	1.22811	6.88925	5.60892e-12	1.55434e-11
CDH4	98.155	-5.05451	0.473106	-10.6837	1.21377e-26	7.38726e-26
CDH6	2232.05	-9.40282	0.35619	-26.3984	1.43057e-153	1.8462e-151
CDHR3	25.8068	-4.28372	0.637481	-6.71976	1.82024e-11	4.87103e-11
CDHR5	17.07	-3.11871	0.628534	-4.96188	6.98145e-07	1.35651e-06
CDIP1	530.46	-1.37801	0.140512	-9.80705	1.0499e-22	5.29005e-22
CDK1	209.381	-1.09042	0.285118	-3.82446	0.000131058	0.000212361
CDK14	1587.96	2.09949	0.124898	16.8096	2.07564e-63	4.07056e-62
CDK15	36.771	-8.02186	1.22892	-6.52758	6.68426e-11	1.72563e-10
CDK17	636.304	-1.68257	0.127759	-13.1699	1.30715e-39	1.25809e-38
CDK2	246.674	-2.66913	0.254941	-10.4696	1.19156e-25	6.90874e-25
CDK2AP1	1892.06	2.68886	0.121712	22.092	3.77259e-108	2.10598e-106
CDK3	23.6084	2.70554	0.520137	5.20159	1.97593e-07	3.99379e-07
CDK5	134.981	2.13082	0.212999	10.0039	1.46536e-23	7.68338e-23
CDK5RAP1	129.702	-1.18576	0.207855	-5.70475	1.16512e-08	2.58672e-08
CDK5RAP2	380.87	-1.00067	0.147259	-6.79532	1.08073e-11	2.93859e-11
CDK5RAP3	251.608	-2.14852	0.203056	-10.5809	3.65262e-26	2.17239e-25
CDK8	107.371	-1.51709	0.217307	-6.98131	2.92449e-12	8.27824e-12
CDKL1	31.1291	1.59501	0.437119	3.64891	0.000263354	0.00041469
CDKL4	36.5484	2.5804	0.476641	5.41372	6.17295e-08	1.3039e-07
CDKN1C	32.042	-1.55864	0.543859	-2.8659	0.00415824	0.0058666
CDKN2B	3390.43	4.27519	0.116901	36.5712	8.21266e-293	6.57122e-290
CDKN2C	251.381	1.0221	0.230595	4.43246	9.31626e-06	1.65871e-05
CDKN3	71.0504	-1.20599	0.350838	-3.43744	0.000587234	0.000897718
CDNF	4.25419	-3.89814	1.43985	-2.70732	0.00678285	0.00936044
CDO1	62.1495	-5.97662	0.646465	-9.24508	2.35064e-20	1.05783e-19
CDON	1182.52	6.93688	0.608004	11.4093	3.75825e-30	2.63319e-29
CDPF1	102.143	-1.61402	0.2397	-6.73349	1.65641e-11	4.44549e-11
CDT1	79.1563	-1.8075	0.295242	-6.12209	9.23553e-10	2.2258e-09
CDYL	495.832	-1.24897	0.126224	-9.89483	4.38341e-23	2.25406e-22
CEACAM19	27.0364	-6.5746	1.24815	-5.26745	1.38329e-07	2.83653e-07
CELF2	475.892	1.07735	0.133937	8.04369	8.71746e-16	3.04414e-15
CELSR1	34.8734	1.17732	0.413864	2.84469	0.00444543	0.00625659
CELSR2	92.023	-8.30225	1.04269	-7.96231	1.68852e-15	5.82347e-15
CELSR3	78.5915	-3.25484	0.370557	-8.78364	1.58262e-18	6.42362e-18
CEMIP	4123.31	-3.65257	0.20999	-17.394	9.15879e-68	2.02066e-66
CEND1	127.621	1.10124	0.287644	3.82848	0.000128939	0.000209097
CENPA	94.3964	-1.36937	0.381534	-3.58912	0.000331802	0.00051718
CENPBD1	110.109	6.43542	0.678148	9.48969	2.31727e-21	1.09885e-20
CENPE	468.399	-1.40044	0.241487	-5.79923	6.66182e-09	1.50887e-08
CENPF	2675.27	-1.65305	0.205203	-8.05568	7.90364e-16	2.7672e-15
CENPH	64.3562	-1.5289	0.295375	-5.17614	2.26522e-07	4.56467e-07
CENPJ	174.673	-1.63775	0.270182	-6.06167	1.34716e-09	3.20996e-09
CENPP	50.602	1.9597	0.341363	5.7408	9.42321e-09	2.10924e-08
CENPT	230.503	-2.15628	0.250806	-8.5974	8.15439e-18	3.1848e-17
CENPU	67.6185	-3.12439	0.344139	-9.07886	1.09714e-19	4.75718e-19
CENPV	58.4164	-1.94192	0.31438	-6.17697	6.5345e-10	1.59017e-09
CEP120	473.186	1.38379	0.137291	10.0793	6.82167e-24	3.64369e-23
CEP170B	829.626	-2.04405	0.123261	-16.5831	9.23644e-62	1.73483e-60
CEP19	184.04	2.13303	0.19482	10.9487	6.73917e-28	4.32995e-27
CEP41	104.447	-1.55196	0.251904	-6.16089	7.23357e-10	1.75424e-09
CEP55	336.493	-3.10832	0.312705	-9.94009	2.78583e-23	1.44618e-22
CEP57	349.895	-1.06491	0.14716	-7.23643	4.60643e-13	1.37289e-12
CEP57L1	176.094	1.10992	0.179348	6.18862	6.0692e-10	1.48084e-09
CEP83	118.714	1.08932	0.246169	4.42509	9.64019e-06	1.71359e-05
CEP95	97.2374	-1.56338	0.282485	-5.5344	3.12301e-08	6.72329e-08
CERCAM	571.339	-1.47061	0.13937	-10.5519	4.9798e-26	2.94277e-25
CERK	993.179	-1.45614	0.167625	-8.68688	3.72531e-18	1.48394e-17
CERKL	140.198	-7.59454	0.744931	-10.195	2.08836e-24	1.14137e-23
CERS2	522.995	2.27537	0.130812	17.3942	9.12851e-68	2.01769e-66
CERS6	360.31	2.73541	0.201757	13.558	7.1062e-42	7.36517e-41
CETN3	188.265	2.81707	0.193378	14.5677	4.50672e-48	5.80985e-47
CFAP100	11.3258	3.84137	1.00663	3.81607	0.000135594	0.000219209
CFAP157	101.455	2.07895	0.232839	8.92871	4.31003e-19	1.80115e-18
CFAP161	10.3256	2.6103	0.761127	3.42952	0.000604651	0.000923285
CFAP20	181.145	-1.52784	0.176987	-8.6325	6.00238e-18	2.36044e-17
CFAP36	215.55	1.58616	0.196194	8.08467	6.23336e-16	2.19908e-15
CFAP53	47.4087	2.06573	0.396888	5.20482	1.94189e-07	3.92697e-07
CFAP54	15.4065	1.89776	0.57655	3.29158	0.000996276	0.00148686
CFAP69	336.953	7.23097	0.505218	14.3126	1.8261e-46	2.23413e-45
CFAP70	25.6905	4.45992	0.698489	6.38509	1.71295e-10	4.32817e-10
CFAP73	48.2624	8.7581	1.21123	7.23077	4.80279e-13	1.42929e-12
CFAP74	13.7097	7.03902	1.28588	5.47408	4.39791e-08	9.36214e-08
CFB	33.8599	3.49821	0.499699	7.00063	2.54823e-12	7.23878e-12
CFD	198.301	6.1601	0.404954	15.2119	2.95003e-52	4.30733e-51
CFH	110.488	-8.58722	1.20846	-7.10594	1.1951e-12	3.468e-12
CFI	20.6146	6.60385	1.25117	5.27816	1.30486e-07	2.68028e-07
CFL2	4680.95	1.47384	0.185756	7.93425	2.11767e-15	7.24524e-15
CFLAR	964.918	2.36169	0.204571	11.5446	7.86048e-31	5.62561e-30
CFTR	11.0895	-5.8483	1.33816	-4.37041	1.24015e-05	2.18823e-05
CGN	6.86947	-2.41956	0.936446	-2.58377	0.00977268	0.0132503
CGNL1	413.857	5.51044	0.252345	21.837	1.03386e-105	5.44228e-104
CGREF1	480.412	9.03844	0.529509	17.0695	2.50519e-65	5.17509e-64
CH25H	20.1799	1.24423	0.595838	2.08821	0.0367792	0.0467561
CHAC2	32.2419	-1.81093	0.403717	-4.48563	7.26972e-06	1.30635e-05
CHAD	14.9153	-2.50838	0.705043	-3.55777	0.00037402	0.000580423
CHADL	11.1783	-2.69232	0.69345	-3.88249	0.000103391	0.000168783
CHCHD2	948.35	-1.60147	0.139596	-11.4722	1.81983e-30	1.28707e-29
CHCHD5	87.8028	1.84851	0.254277	7.26967	3.60366e-13	1.08101e-12
CHCHD6	56.4816	1.02819	0.295829	3.47561	0.000509695	0.000783173
CHD1L	248.21	-2.19437	0.168183	-13.0475	6.56879e-39	6.198e-38
CHD7	155.949	5.03673	0.336376	14.9735	1.09377e-50	1.52823e-49
CHD9	1003.17	-1.45259	0.116144	-12.5068	6.85176e-36	5.8992e-35
CHEK1	144.725	-1.36857	0.225246	-6.07586	1.23327e-09	2.94914e-09
CHFR	276.582	1.59362	0.173384	9.19128	3.882e-20	1.72307e-19
CHIC1	89.5819	-1.71713	0.285849	-6.00713	1.88832e-09	4.44907e-09
CHKA	225.082	2.78015	0.193741	14.3498	1.06797e-46	1.31734e-45
CHKB	103.11	4.84338	0.398868	12.1428	6.26202e-34	5.03057e-33
CHL1	24.5658	-5.22982	0.979981	-5.33665	9.46777e-08	1.96834e-07
CHMP4B	713.733	1.13024	0.126811	8.91281	4.97574e-19	2.07141e-18
CHMP6	242.503	1.28317	0.163742	7.83652	4.63201e-15	1.55419e-14
CHN1	816.348	-1.55276	0.139223	-11.153	6.92107e-29	4.61482e-28
CHORDC1	763.134	1.66362	0.141333	11.771	5.50803e-32	4.09587e-31
CHPF2	3135.12	-1.75796	0.144849	-12.1365	6.7683e-34	5.4264e-33
CHRD	25.849	3.57463	0.573341	6.23474	4.5252e-10	1.11408e-09
CHRM2	1078.94	-2.00304	0.14093	-14.2131	7.60222e-46	9.03384e-45
CHRNB2	10.6753	1.35982	0.622652	2.18392	0.0289683	0.0372405
CHRNE	18.2965	4.15186	0.735577	5.64436	1.65799e-08	3.63855e-08
CHRNG	7.53766	-5.26568	1.33986	-3.93002	8.49384e-05	0.000139705
CHST10	332.416	1.21208	0.162843	7.44324	9.82474e-14	3.05562e-13
CHST11	214.856	2.08398	0.265251	7.85663	3.94611e-15	1.32888e-14
CHST12	582.284	2.48583	0.12577	19.765	5.96436e-87	2.18912e-85
CHST14	382.76	-1.4502	0.137455	-10.5503	5.06276e-26	2.98884e-25
CHST15	184.828	-3.07134	0.30839	-9.95929	2.297e-23	1.19759e-22
CHST2	321.285	2.06173	0.1859	11.0906	1.39421e-28	9.20426e-28
CHST3	977.875	-1.47499	0.162605	-9.071	1.17933e-19	5.09699e-19
CHST6	14.2822	2.93307	0.613677	4.7795	1.75733e-06	3.30742e-06
CHSY3	940.154	4.72568	0.231175	20.442	7.07357e-93	3.03204e-91
CHTF18	121.36	-2.55248	0.344869	-7.4013	1.34859e-13	4.15232e-13
CHTOP	1312.34	1.89124	0.100183	18.8778	1.73605e-79	5.18312e-78
CHURC1	155.731	2.32597	0.19758	11.7723	5.4206e-32	4.03336e-31
CIAO1	743.048	-1.12937	0.123008	-9.1813	4.25922e-20	1.88771e-19
CIART	102.767	1.16072	0.246882	4.70153	2.58213e-06	4.80179e-06
CIC	922.828	-1.78628	0.132469	-13.4845	1.92842e-41	1.98159e-40
CILP2	9.72709	-2.52605	0.733322	-3.44467	0.000571753	0.00087472
CISD2	137.459	1.8453	0.212384	8.68855	3.67111e-18	1.46284e-17
CISD3	90.7906	-1.08002	0.235992	-4.57652	4.72764e-06	8.62327e-06
CIT	220.988	-1.66423	0.281466	-5.91274	3.36458e-09	7.79568e-09
CIZ1	287.129	-1.00722	0.156005	-6.45637	1.07247e-10	2.73926e-10
CKAP5	914.252	-1.29954	0.111352	-11.6705	1.8035e-31	1.32066e-30
CKMT2	9.17904	-6.63098	1.34015	-4.94796	7.49972e-07	1.45368e-06
CKS1B	80.8612	1.56866	0.336556	4.66093	3.14786e-06	5.81866e-06
CKS2	252.998	-1.82636	0.244595	-7.46688	8.21167e-14	2.56124e-13
CLASP1	883.999	-1.19027	0.116331	-10.2318	1.42889e-24	7.87398e-24
CLCC1	249.239	1.06105	0.159994	6.63181	3.31587e-11	8.71405e-11
CLCN4	99.9211	-7.67239	0.861674	-8.90406	5.38416e-19	2.23524e-18
CLCN5	617.1	1.89716	0.134006	14.1573	1.68312e-45	1.96889e-44
CLDN11	1680.28	-10.3233	0.677484	-15.2378	1.98581e-52	2.9208e-51
CLDN15	44.3765	-1.55681	0.338087	-4.60474	4.12972e-06	7.56815e-06
CLDN20	7.13272	-6.04594	1.37535	-4.39592	1.10305e-05	1.95226e-05
CLDN23	141.945	-1.7965	0.282657	-6.35578	2.07378e-10	5.21137e-10
CLDN4	20.5556	-3.35264	0.655945	-5.11116	3.20189e-07	6.38039e-07
CLDND1	444.077	1.24564	0.14874	8.37465	5.53892e-17	2.06001e-16
CLEC11A	649.953	-6.30248	0.240063	-26.2534	6.53187e-152	8.25216e-150
CLEC14A	110.74	-6.64883	0.667795	-9.95639	2.36499e-23	1.23197e-22
CLEC2B	27.9553	-1.72333	0.453914	-3.79659	0.000146699	0.000236524
CLEC3B	6.70049	-5.11571	1.36575	-3.7457	0.000179891	0.000287951
CLGN	51.775	-2.62131	0.392318	-6.68159	2.36366e-11	6.27763e-11
CLHC1	25.8801	-4.49205	0.693557	-6.47683	9.36697e-11	2.40116e-10
CLIC1	2652.77	-2.33038	0.184263	-12.647	1.16199e-36	1.02021e-35
CLIP2	1955.96	-2.0271	0.172709	-11.7371	8.22337e-32	6.07739e-31
CLIP4	410.472	-3.26187	0.253273	-12.8789	5.91822e-38	5.44295e-37
CLK2	204.418	-2.07546	0.224006	-9.2652	1.94703e-20	8.80493e-20
CLK4	237.147	1.23117	0.229231	5.37088	7.83543e-08	1.64034e-07
CLMP	2570.68	-4.9331	0.223802	-22.0423	1.1336e-107	6.21254e-106
CLN3	117.421	2.5745	0.26735	9.62969	5.99071e-22	2.92516e-21
CLN5	164.795	1.35743	0.182502	7.43785	1.0234e-13	3.1788e-13
CLN6	183.565	-2.38161	0.182335	-13.0617	5.44837e-39	5.15705e-38
CLN8	640.438	1.31962	0.143989	9.16469	4.96905e-20	2.19825e-19
CLSPN	143.843	-1.61185	0.327642	-4.91954	8.67483e-07	1.67146e-06
CLSTN3	116.855	-5.22572	0.46617	-11.2099	3.64603e-29	2.45152e-28
CLTA	1482.76	-1.04531	0.100928	-10.357	3.88886e-25	2.1954e-24
CLTB	845.619	-2.29172	0.156717	-14.6233	1.99498e-48	2.59975e-47
CLTCL1	91.8205	-7.21929	0.761183	-9.4843	2.44026e-21	1.15444e-20
CLU	1509.74	-3.34495	0.487016	-6.86826	6.49917e-12	1.79276e-11
CLUAP1	295.723	2.06043	0.164752	12.5063	6.89816e-36	5.93064e-35
CMBL	238.951	2.11948	0.19252	11.0091	3.4542e-28	2.23852e-27
CMC1	111.908	2.80776	0.229384	12.2404	1.89105e-34	1.54397e-33
CMC2	223.682	2.68098	0.196473	13.6455	2.1476e-42	2.26499e-41
CMC4	15.2206	7.16749	1.26529	5.6647	1.47286e-08	3.24591e-08
CMSS1	67.4812	-1.36808	0.261886	-5.22396	1.75137e-07	3.55548e-07
CMTM3	858.187	1.30287	0.123972	10.5094	7.82011e-26	4.58062e-25
CMTM4	959.449	1.26502	0.131531	9.61768	6.73337e-22	3.28245e-21
CMTR1	361.651	-1.4207	0.159484	-8.90808	5.19259e-19	2.15944e-18
CMYA5	45.9188	-1.29772	0.417627	-3.10736	0.00188767	0.00275418
CNDP2	886.323	2.20084	0.114769	19.1762	5.84474e-82	1.83635e-80
CNEP1R1	365.485	1.05812	0.13583	7.79007	6.69714e-15	2.23399e-14
CNIH1	913.739	1.31155	0.153678	8.5344	1.40886e-17	5.42308e-17
CNIH3	125.785	-4.44956	0.815118	-5.4588	4.79366e-08	1.01847e-07
CNKSR3	418.097	1.52369	0.217293	7.01214	2.347e-12	6.6756e-12
CNN3	4377.45	-1.1861	0.121411	-9.76931	1.52489e-22	7.62256e-22
CNNM2	1188.61	2.07815	0.273797	7.59011	3.19642e-14	1.02248e-13
CNNM3	295.841	1.46159	0.159392	9.16983	4.73769e-20	2.09667e-19
CNNM4	309.029	1.47167	0.154391	9.53209	1.54143e-21	7.37063e-21
CNOT2	606.024	1.90215	0.139526	13.6329	2.5518e-42	2.68419e-41
CNOT6L	294.708	1.37994	0.153208	9.00701	2.11748e-19	9.01524e-19
CNPPD1	457.317	-1.17719	0.142702	-8.24929	1.59336e-16	5.79151e-16
CNPY3	557.217	-1.00806	0.128205	-7.86283	3.75543e-15	1.26644e-14
CNPY4	369.653	1.09711	0.153882	7.12958	1.00677e-12	2.93212e-12
CNRIP1	157.242	-2.34705	0.264018	-8.88973	6.12569e-19	2.53432e-18
CNTD1	7.75235	-2.00527	0.805421	-2.48972	0.0127845	0.0170944
CNTF	12.9455	1.4585	0.600662	2.42815	0.0151762	0.020151
CNTROB	252.888	-2.71771	0.193643	-14.0347	9.56656e-45	1.09455e-43
COA4	604.379	-2.58011	0.15385	-16.7702	4.02851e-63	7.87462e-62
COA5	483.165	2.8634	0.150997	18.9633	3.43158e-80	1.04799e-78
COASY	628.086	-1.25901	0.118644	-10.6116	2.63142e-26	1.57753e-25
COG3	224.55	-1.26997	0.178639	-7.10915	1.16759e-12	3.38897e-12
COG6	315.833	2.15147	0.165846	12.9726	1.74902e-38	1.63106e-37
COG7	203.606	2.07528	0.19329	10.7366	6.85145e-27	4.20835e-26
COG8	303.22	2.45485	0.177731	13.8121	2.15415e-43	2.36759e-42
COL10A1	33.6931	1.2461	0.355078	3.50936	0.000449179	0.000692937
COL11A1	103.541	-1.67705	0.363987	-4.60745	4.07632e-06	7.47615e-06
COL12A1	8450.48	-3.41448	0.177852	-19.1984	3.81492e-82	1.21129e-80
COL13A1	128.913	-9.52724	1.21256	-7.85715	3.92985e-15	1.32415e-14
COL14A1	415.697	2.59789	0.809737	3.20832	0.00133513	0.00197538
COL15A1	1366.68	2.1328	0.201307	10.5947	3.15221e-26	1.88316e-25
COL16A1	537.135	-1.50125	0.204531	-7.33993	2.13701e-13	6.49163e-13
COL17A1	16.051	1.3082	0.609511	2.14632	0.0318477	0.0407892
COL1A2	38582.2	1.07883	0.184893	5.83486	5.38346e-09	1.22744e-08
COL21A1	38.9965	5.40851	0.687441	7.86761	3.61489e-15	1.22111e-14
COL23A1	86.4871	7.91471	1.04515	7.57277	3.65341e-14	1.16308e-13
COL24A1	57.4613	-2.15037	0.319435	-6.73179	1.67586e-11	4.49467e-11
COL27A1	248.745	-2.40076	0.22503	-10.6686	1.42754e-26	8.64883e-26
COL3A1	22166.7	1.79893	0.422079	4.26206	2.02551e-05	3.5115e-05
COL4A1	7657.81	1.1592	0.180528	6.42114	1.3526e-10	3.43576e-10
COL4A5	460.506	-2.09492	0.238966	-8.76659	1.84158e-18	7.44951e-18
COL4A6	171.767	-9.18798	1.06697	-8.61125	7.22689e-18	2.83084e-17
COL5A2	14573.1	1.80884	0.173845	10.4049	2.35459e-25	1.34251e-24
COL5A3	35.2595	-4.64046	0.582971	-7.96002	1.72007e-15	5.92544e-15
COL6A1	17700.6	-7.29332	0.15635	-46.6474	0	0
COL6A2	15373.7	-2.71216	0.171503	-15.8141	2.48879e-56	4.0311e-55
COL6A3	48972.3	-5.61127	0.157667	-35.5893	2.0525e-277	1.36856e-274
COL7A1	646.783	-7.39189	0.330308	-22.3788	6.33886e-111	3.78503e-109
COL8A2	72.1711	-3.18113	0.363616	-8.7486	2.16011e-18	8.70571e-18
COL9A2	24.5174	-6.16825	1.11735	-5.52041	3.38207e-08	7.26796e-08
COLEC10	132.928	-10.5885	1.20773	-8.76728	1.83038e-18	7.40668e-18
COLEC12	514.988	1.23559	0.513744	2.40507	0.0161695	0.021387
COLGALT2	82.5857	-2.99546	0.334762	-8.94801	3.61941e-19	1.51995e-18
COMMD10	82.2763	-2.51818	0.310057	-8.12167	4.59802e-16	1.63561e-15
COMMD4	255.055	-2.05715	0.173333	-11.8681	1.73261e-32	1.3178e-31
COMMD6	178.44	-1.87368	0.193429	-9.68669	3.43497e-22	1.69308e-21
COMMD8	190.108	-1.52076	0.261934	-5.80588	6.40279e-09	1.4524e-08
COPE	412.736	-1.78146	0.13538	-13.1589	1.51262e-39	1.45352e-38
COPG1	1294.8	-1.19272	0.102721	-11.6112	3.61404e-31	2.61142e-30
COPS6	402.355	-2.62388	0.166805	-15.7302	9.39054e-56	1.50074e-54
COQ10A	114.62	1.00414	0.237212	4.23308	2.3051e-05	3.97726e-05
COQ3	94.3101	1.07351	0.226271	4.74435	2.09179e-06	3.91603e-06
COQ6	63.328	2.21685	0.292234	7.58587	3.30258e-14	1.05447e-13
COQ7	104.014	2.28526	0.245142	9.32222	1.13933e-20	5.21718e-20
COQ9	346.074	1.06935	0.156811	6.81937	9.14393e-12	2.49933e-11
CORIN	21.827	-4.66186	0.934044	-4.99105	6.00506e-07	1.17268e-06
CORO2A	29.0837	-2.79285	0.508395	-5.49346	3.94136e-08	8.42912e-08
CORO2B	100.977	-3.28646	0.299422	-10.976	4.98401e-28	3.20913e-27
CORO6	88.4302	-3.3337	0.418005	-7.97525	1.5207e-15	5.2522e-15
COX16	134.963	4.91845	0.31075	15.8277	2.00559e-56	3.26167e-55
COX17	20.2322	-1.98518	0.526476	-3.7707	0.000162789	0.000261378
COX18	212.388	1.13069	0.186508	6.06242	1.34085e-09	3.19651e-09
COX20	195.941	4.59136	0.23236	19.7597	6.61753e-87	2.41409e-85
COX5A	206.525	1.90406	0.175783	10.8319	2.43125e-27	1.53094e-26
COX6A1	421.931	1.98127	0.167611	11.8207	3.05288e-32	2.29578e-31
COX7B	332.083	1.6884	0.165165	10.2225	1.57229e-24	8.64833e-24
COX7C	489.092	1.05909	0.131142	8.07588	6.6989e-16	2.35916e-15
COX8A	1449.2	-1.24498	0.145373	-8.56401	1.09012e-17	4.23007e-17
CPA4	228.105	-11.4789	1.19553	-9.60151	7.87803e-22	3.82647e-21
CPAMD8	42.4056	2.79068	0.381358	7.31777	2.52134e-13	7.62052e-13
CPE	111.97	-2.12142	0.345052	-6.14814	7.83988e-10	1.89744e-09
CPEB1	122.333	1.03125	0.228588	4.51141	6.43993e-06	1.16316e-05
CPEB3	40.073	1.29839	0.334867	3.87734	0.000105605	0.000172235
CPEB4	646.504	1.18867	0.143444	8.28668	1.16452e-16	4.25857e-16
CPED1	1302.08	-4.63279	0.222437	-20.8275	2.44001e-96	1.11775e-94
CPNE3	1414.16	-1.07172	0.117467	-9.1236	7.26678e-20	3.17958e-19
CPNE7	101.107	-7.39802	0.859303	-8.60932	7.3492e-18	2.875e-17
CPNE8	39.1807	8.67816	1.21588	7.13738	9.51291e-13	2.77559e-12
CPQ	691.442	1.36645	0.127023	10.7575	5.46174e-27	3.37722e-26
CPS1	21.2622	-7.90402	1.26812	-6.23289	4.57922e-10	1.12715e-09
CPSF3L	347.484	-1.08568	0.152087	-7.13856	9.43122e-13	2.75276e-12
CPSF4	193.955	-1.51042	0.175875	-8.58808	8.84339e-18	3.44717e-17
CPT1C	154.525	-2.42925	0.236393	-10.2763	9.01027e-25	5.00886e-24
CPT2	384.827	1.96177	0.199913	9.81313	9.88547e-23	4.99349e-22
CPTP	406.826	-2.61955	0.160313	-16.3402	5.10665e-60	9.21655e-59
CPXM1	40.5643	-6.1137	0.885192	-6.90663	4.96285e-12	1.3788e-11
CPXM2	2035.8	14.3835	1.18295	12.159	5.1358e-34	4.13968e-33
CRABP2	163.547	-7.44157	1.1654	-6.38544	1.70906e-10	4.31927e-10
CRACR2A	32.1601	2.93365	0.511757	5.73252	9.89506e-09	2.21114e-08
CRACR2B	36.8914	-2.20792	0.384434	-5.7433	9.28513e-09	2.08027e-08
CRAT	380.975	-1.46789	0.140439	-10.4521	1.43274e-25	8.26716e-25
CRB2	37.2461	5.7004	0.812697	7.01418	2.31309e-12	6.5864e-12
CREBRF	348.396	-1.67975	0.197458	-8.50684	1.78743e-17	6.84079e-17
CREG1	168.2	1.33029	0.216395	6.14754	7.86958e-10	1.90425e-09
CREG2	85.6514	7.73378	0.867139	8.91874	4.71621e-19	1.9661e-18
CRELD2	279.678	1.84861	0.174051	10.6211	2.37732e-26	1.42949e-25
CRIM1	12175.8	1.61901	0.14689	11.0219	2.99692e-28	1.94743e-27
CRIP2	697.527	1.49383	0.159297	9.37762	6.7478e-21	3.11608e-20
CRIPT	360.314	2.38838	0.165386	14.4412	2.84791e-47	3.58663e-46
CRISPLD2	4070.36	5.53948	0.270121	20.5074	1.84878e-93	7.98166e-92
CRLF1	151.907	1.77227	0.353497	5.01353	5.34393e-07	1.04715e-06
CRLF3	374.599	1.65894	0.15349	10.8081	3.15058e-27	1.97047e-26
CRMP1	110.955	-2.09518	0.264857	-7.91063	2.56084e-15	8.70932e-15
CROCC	106.745	-1.36674	0.268652	-5.08742	3.62975e-07	7.19832e-07
CROT	150.391	-1.8659	0.232377	-8.02961	9.77821e-16	3.40959e-15
CRY2	167.427	-3.45917	0.253783	-13.6304	2.64069e-42	2.77527e-41
CRYAB	238.557	2.1171	0.233023	9.08537	1.03343e-19	4.48743e-19
CRYBG3	1518.87	1.09786	0.120562	9.10618	8.53331e-20	3.72154e-19
CRYGN	12.0347	3.39895	0.805596	4.21918	2.45195e-05	4.22214e-05
CRYL1	39.7585	-2.1605	0.404148	-5.34581	9.00143e-08	1.87431e-07
CRYM	51.3285	6.08719	0.71059	8.56638	1.06789e-17	4.14516e-17
CRYZL1	88.817	1.34139	0.227408	5.89863	3.66543e-09	8.46172e-09
CSDC2	553.079	-10.7167	1.02963	-10.4083	2.27131e-25	1.29625e-24
CSE1L	562.8	-1.64583	0.156843	-10.4935	9.25336e-26	5.40432e-25
CSF3R	13.156	3.35484	0.747971	4.48525	7.28275e-06	1.3083e-05
CSMD2	12.0537	-4.10327	0.901038	-4.55393	5.26524e-06	9.56607e-06
CSNK1A1	3829.41	1.76327	0.0974102	18.1015	3.10184e-73	7.97179e-72
CSPG5	66.4327	6.71923	0.701912	9.57275	1.04099e-21	5.01969e-21
CSRNP2	654.614	-1.21853	0.148533	-8.20377	2.32969e-16	8.39163e-16
CSRNP3	41.3322	1.83385	0.635182	2.88712	0.00388783	0.00550516
CSRP2	409.657	1.36823	0.267361	5.11754	3.09547e-07	6.17242e-07
CSTB	265.183	-4.2102	0.276629	-15.2197	2.61861e-52	3.82809e-51
CSTF2	108.171	1.09464	0.245491	4.45901	8.23405e-06	1.4728e-05
CTAGE5	96.7617	3.18347	0.326853	9.73977	2.04025e-22	1.01564e-21
CTBS	176.743	1.21079	0.200869	6.02777	1.66237e-09	3.93215e-09
CTF1	29.0722	-2.88388	0.544566	-5.29573	1.18542e-07	2.445e-07
CTH	20.4055	1.25517	0.50706	2.47538	0.0133093	0.0177724
CTHRC1	1281.3	-3.6404	0.180453	-20.1737	1.66827e-90	6.7644e-89
CTIF	1168.13	-1.27006	0.119188	-10.6559	1.63608e-26	9.89732e-26
CTNNB1	7040.77	1.06547	0.117282	9.08474	1.03947e-19	4.51203e-19
CTNNBIP1	56.9507	-1.60465	0.325381	-4.93161	8.15556e-07	1.57469e-06
CTRL	11.9595	6.82099	1.29735	5.25764	1.45914e-07	2.98697e-07
CTSD	4191.14	1.12627	0.107305	10.4959	9.01773e-26	5.26927e-25
CTSF	765.666	2.95188	0.20225	14.5952	3.01404e-48	3.90654e-47
CTSH	29.0649	-2.3209	0.462039	-5.02318	5.08231e-07	9.96534e-07
CTSK	1497.16	-1.95251	0.158936	-12.2848	1.09265e-34	8.98835e-34
CTSL	510.707	-10.1573	1.03201	-9.84225	7.40398e-23	3.76377e-22
CTSS	5.04626	-3.35029	1.2854	-2.60641	0.0091497	0.012438
CTTN	2721.5	-2.15386	0.107791	-19.9818	7.92368e-89	3.03834e-87
CTTNBP2	171.864	-4.14859	0.373733	-11.1004	1.24894e-28	8.25885e-28
CTXN1	34.4895	-1.47836	0.354748	-4.16736	3.0815e-05	5.26691e-05
CUEDC1	485.117	-1.34842	0.136398	-9.88589	4.79308e-23	2.4584e-22
CUEDC2	263.235	-1.56968	0.185925	-8.44255	3.10495e-17	1.17298e-16
CUL1	484.589	-1.08291	0.167668	-6.45864	1.0565e-10	2.69904e-10
CUL4B	794.896	-1.23983	0.175734	-7.05512	1.72448e-12	4.94793e-12
CUL7	712.463	-1.32423	0.148195	-8.93571	4.04561e-19	1.69478e-18
CUL9	349.192	-1.32088	0.152398	-8.66731	4.42465e-18	1.75494e-17
CUTA	956.619	-2.01184	0.12043	-16.7054	1.19729e-62	2.2882e-61
CUX1	956.962	1.77358	0.142895	12.4118	2.25603e-35	1.89216e-34
CUZD1	8.94433	-6.80838	1.34351	-5.06761	4.02843e-07	7.96658e-07
CWC15	279.932	1.10728	0.187837	5.8949	3.74909e-09	8.64321e-09
CXADR	63.5736	2.65023	0.343906	7.70626	1.29561e-14	4.2579e-14
CXCL14	21.5275	7.87626	1.27301	6.18712	6.12736e-10	1.49473e-09
CXCL16	40.5444	3.69758	0.466816	7.92084	2.35906e-15	8.04587e-15
CXorf23	144.99	1.25255	0.211307	5.92762	3.07359e-09	7.14354e-09
CXorf40A	122.862	1.7629	0.209397	8.41894	3.79922e-17	1.42718e-16
CXorf56	230.877	1.4297	0.160867	8.88748	6.25108e-19	2.58352e-18
CXorf58	8.2179	6.2446	1.36978	4.55884	5.14361e-06	9.35641e-06
CYB561A3	881.307	2.54558	0.120041	21.206	8.4128e-100	4.05504e-98
CYB5A	263.819	1.22709	0.152215	8.06153	7.53475e-16	2.64035e-15
CYB5D1	98.3093	7.46355	0.74986	9.95326	2.44043e-23	1.27072e-22
CYB5R2	59.233	1.22896	0.387657	3.17022	0.00152321	0.00224094
CYB5R4	211.229	1.96202	0.181432	10.8141	2.95289e-27	1.85262e-26
CYB5RL	53.8618	1.21565	0.293921	4.13598	3.53442e-05	6.00936e-05
CYBA	428.569	1.46815	0.161345	9.09946	9.07837e-20	3.95351e-19
CYBRD1	2279.53	-1.14344	0.12214	-9.36172	7.84507e-21	3.61168e-20
CYCS	1576.21	1.54332	0.162788	9.48054	2.52967e-21	1.19579e-20
CYGB	242.883	-1.81038	0.200783	-9.01663	1.93958e-19	8.28722e-19
CYP11A1	10.6639	5.93456	1.31093	4.52699	5.9829e-06	1.08273e-05
CYP1B1	4190.89	3.62987	0.752708	4.82241	1.41833e-06	2.68795e-06
CYP20A1	676.266	3.17569	0.131118	24.22	1.37048e-129	1.18335e-127
CYP2R1	410.296	2.82658	0.188576	14.989	8.6586e-51	1.21544e-49
CYP2S1	60.2405	-5.43941	0.603256	-9.01675	1.93746e-19	8.28112e-19
CYP2U1	1135.31	3.14454	0.13792	22.7998	4.60981e-115	3.0069e-113
CYP2W1	24.9305	4.23648	0.662802	6.39178	1.63971e-10	4.14923e-10
CYP39A1	47.9999	7.63112	1.20837	6.3152	2.69812e-10	6.7394e-10
CYP51A1	687.33	2.7193	0.237238	11.4623	2.03926e-30	1.43972e-29
CYP7B1	66.7056	8.5811	1.2081	7.10296	1.22111e-12	3.54176e-12
CYR61	4073.34	1.52396	0.17194	8.86332	7.76692e-19	3.20119e-18
CYTH2	373.738	1.75545	0.153281	11.4525	2.28556e-30	1.61171e-29
CYTH3	498.053	-2.59183	0.144201	-17.9737	3.13214e-72	7.84801e-71
CYTL1	19.8519	-7.31229	1.26152	-5.79643	6.77432e-09	1.5332e-08
DAAM1	432.756	3.50924	0.198644	17.666	7.66753e-70	1.79738e-68
DAAM2	1388.68	4.77658	0.230702	20.7045	3.1535e-95	1.42359e-93
DAB1	20.4137	-5.60132	1.16868	-4.79287	1.6441e-06	3.10308e-06
DAB2	2009.01	-1.81619	0.18691	-9.71696	2.55285e-22	1.26295e-21
DACH1	26.7827	-7.80891	1.23587	-6.31856	2.64013e-10	6.59592e-10
DACT1	1647.07	3.37088	0.23624	14.2689	3.41938e-46	4.13704e-45
DAD1	1016.26	-1.34211	0.125998	-10.6518	1.7097e-26	1.03374e-25
DAGLA	68.3997	-1.13763	0.265777	-4.28039	1.86566e-05	3.24819e-05
DALRD3	116.097	-1.16509	0.226555	-5.14266	2.70882e-07	5.4285e-07
DAP3	454.848	1.06519	0.138544	7.68843	1.48955e-14	4.87127e-14
DAPK1	66.1824	1.62749	0.294902	5.51873	3.41461e-08	7.33397e-08
DAPK2	31.8461	1.36468	0.479638	2.84522	0.00443804	0.0062474
DARS2	239.939	-1.45957	0.180048	-8.10654	5.20817e-16	1.84609e-15
DBF4B	87.2848	-3.69013	0.296786	-12.4336	1.71621e-35	1.44954e-34
DBNDD1	198.883	-3.65603	0.251048	-14.5631	4.82336e-48	6.21137e-47
DBNDD2	184.971	6.16572	0.362807	16.9945	9.01874e-65	1.83463e-63
DBNL	1019.93	1.04848	0.103262	10.1536	3.19468e-24	1.72792e-23
DCAF5	1419.99	1.54025	0.107259	14.3602	9.19498e-47	1.13771e-45
DCBLD2	5935.94	-2.18211	0.251919	-8.66195	4.63782e-18	1.83707e-17
DCC	6.06239	-5.55934	1.37674	-4.03806	5.3895e-05	9.02032e-05
DCK	277.19	1.41886	0.241672	5.87103	4.33104e-09	9.94475e-09
DCLK1	1304.15	6.70914	0.280361	23.9304	1.47855e-126	1.19097e-124
DCLK2	128.574	-1.81657	0.226862	-8.00738	1.17178e-15	4.07096e-15
DCLRE1A	597.716	2.38031	0.172589	13.7918	2.85622e-43	3.11639e-42
DCST1	15.317	4.37015	0.856069	5.10491	3.30955e-07	6.58946e-07
DCTN5	1070.47	1.2587	0.105077	11.9789	4.58488e-33	3.57555e-32
DCUN1D1	744.124	1.35966	0.110047	12.3553	4.56303e-35	3.79788e-34
DCUN1D3	1040.86	1.36089	0.110821	12.2801	1.15923e-34	9.52296e-34
DCUN1D5	387.793	-1.91306	0.146938	-13.0195	9.48075e-39	8.89664e-38
DCXR	160.126	-4.03959	0.235931	-17.1219	1.01864e-65	2.11883e-64
DDA1	549.178	1.13783	0.139313	8.16743	3.15039e-16	1.12869e-15
DDAH2	419.4	-2.6643	0.18621	-14.308	1.95061e-46	2.37919e-45
DDB2	281.74	-2.30955	0.158782	-14.5454	6.24641e-48	8.00955e-47
DDC	13.8476	7.32258	1.30127	5.62726	1.83091e-08	4.00631e-08
DDIAS	360.729	1.99897	0.192097	10.4061	2.32645e-25	1.3271e-24
DDIT3	676.649	1.58244	0.199119	7.94724	1.90705e-15	6.54892e-15
DDIT4	959.324	3.52221	0.285775	12.3251	6.6356e-35	5.50003e-34
DDO	14.8213	-4.10353	0.805213	-5.0962	3.46535e-07	6.88823e-07
DDR2	7089.42	1.70518	0.132066	12.9116	3.87209e-38	3.58034e-37
DDT	160.362	11.0059	1.19237	9.23023	2.70041e-20	1.2116e-19
DDX11	116.049	-1.83964	0.214541	-8.57476	9.92906e-18	3.86159e-17
DDX17	4798.19	-2.03424	0.11654	-17.4552	3.14014e-68	6.99219e-67
DDX19A	297.224	1.79625	0.168732	10.6456	1.82777e-26	1.1018e-25
DDX31	825.239	3.187	0.130837	24.3586	4.69518e-131	4.26906e-129
DDX39B	754.573	1.15849	0.154549	7.49591	6.58396e-14	2.0686e-13
DDX47	116.146	3.21012	0.270082	11.8857	1.40403e-32	1.07127e-31
DDX51	117.958	1.06055	0.232663	4.55832	5.15656e-06	9.37712e-06
DDX55	173.038	1.25895	0.208025	6.05189	1.43154e-09	3.40494e-09
DDX58	170.054	-1.10855	0.28038	-3.95374	7.69382e-05	0.000127122
DDX59	273.129	1.73188	0.164194	10.5478	5.20093e-26	3.06589e-25
DECR1	363.83	1.93221	0.185406	10.4215	1.97798e-25	1.13262e-24
DECR2	211.16	1.00844	0.178498	5.64956	1.60856e-08	3.53523e-08
DEF6	120.465	3.51571	0.279571	12.5754	2.88394e-36	2.50638e-35
DEK	973.648	-2.91692	0.14142	-20.6259	1.60562e-94	7.1638e-93
DENND1A	246.058	1.678	0.201954	8.30883	9.66502e-17	3.54414e-16
DENND1C	6.94746	6.06454	1.36133	4.45487	8.39438e-06	1.50036e-05
DENND2A	705.446	-2.52126	0.136993	-18.4043	1.21231e-75	3.30685e-74
DENND2C	57.2912	2.47813	0.339828	7.29231	3.04696e-13	9.1791e-13
DENND2D	14.4359	-1.88758	0.546992	-3.45084	0.000558854	0.000855641
DENND4A	288.461	-2.59535	0.18794	-13.8094	2.23554e-43	2.45255e-42
DENND4C	1094.25	1.01692	0.108073	9.40957	4.9816e-21	2.31472e-20
DENND5B	561.55	1.82619	0.159066	11.4807	1.64957e-30	1.16941e-29
DENND6A	253.854	1.31329	0.195724	6.7099	1.94758e-11	5.20135e-11
DENND6B	121.624	2.9412	0.294094	10.0009	1.51072e-23	7.91083e-23
DEPDC1B	41.5745	-1.43066	0.401966	-3.55915	0.000372051	0.000577517
DEPDC7	46.9013	-3.31997	0.392412	-8.46042	2.66415e-17	1.00995e-16
DEPTOR	74.4459	4.87731	0.589106	8.27917	1.24033e-16	4.53302e-16
DERA	147.744	-2.59939	0.22321	-11.6455	2.41955e-31	1.76425e-30
DERL1	1503.71	1.32528	0.104015	12.7412	3.48878e-37	3.12247e-36
DEXI	225.915	10.4366	1.18944	8.77441	1.71795e-18	6.95642e-18
DFFA	645.637	1.33263	0.125895	10.5852	3.48876e-26	2.07802e-25
DFFB	176.16	1.1008	0.186947	5.88828	3.90234e-09	8.98617e-09
DGAT2	25.5425	1.97118	0.634717	3.1056	0.00189892	0.00276924
DGKI	42.0902	-5.4421	0.880018	-6.18407	6.24687e-10	1.52295e-09
DGKQ	437.504	-1.23947	0.157239	-7.88273	3.20295e-15	1.08409e-14
DGUOK	290.784	-2.49412	0.15709	-15.8771	9.13653e-57	1.50627e-55
DHCR24	2671.31	-1.02738	0.239334	-4.29264	1.76558e-05	3.08046e-05
DHDH	41.0215	6.70442	1.05882	6.33197	2.42054e-10	6.05866e-10
DHFR	38.6735	4.05352	0.541505	7.48566	7.11875e-14	2.23079e-13
DHODH	110.3	1.77264	0.227717	7.78442	7.00317e-15	2.33283e-14
DHRS1	102.213	-1.15005	0.218437	-5.26489	1.40276e-07	2.87547e-07
DHRS11	134.319	1.40139	0.203769	6.87733	6.09845e-12	1.6861e-11
DHRS12	8.48787	-3.00202	0.941892	-3.18722	0.00143647	0.00211722
DHRS13	85.7151	2.76306	0.283724	9.73854	2.06507e-22	1.02757e-21
DHRS7	123.335	-4.75071	0.398449	-11.923	8.98001e-33	6.91772e-32
DHRS7B	197.367	2.81506	0.22227	12.6651	9.23563e-37	8.14445e-36
DHX34	314.039	-1.52669	0.162518	-9.39396	5.77878e-21	2.67994e-20
DHX38	369.769	-1.10774	0.143542	-7.7172	1.18913e-14	3.9155e-14
DHX58	45.4395	-3.06015	0.535558	-5.71395	1.10382e-08	2.4579e-08
DHX9	664.553	-2.8242	0.134139	-21.0542	2.09179e-98	9.92317e-97
DIABLO	228.791	4.74183	0.239231	19.8211	1.95806e-87	7.25329e-86
DIAPH3	193.276	-1.29405	0.212157	-6.09948	1.06411e-09	2.55276e-09
DIEXF	365.964	1.07343	0.200944	5.34193	9.19611e-08	1.91418e-07
DIMT1	149.501	-1.23139	0.207131	-5.94495	2.76534e-09	6.44958e-09
DIO1	41.1013	5.0443	0.660095	7.64178	2.14237e-14	6.94375e-14
DIP2A	294.082	-1.10744	0.160649	-6.89355	5.44175e-12	1.5108e-11
DIRAS1	43.9117	-5.94824	1.0665	-5.57736	2.44199e-08	5.2942e-08
DIRAS3	6.34386	-5.54124	1.39263	-3.97898	6.92107e-05	0.000114749
DIS3	339.54	-1.39279	0.15557	-8.95282	3.46524e-19	1.45878e-18
DISP1	1223.04	3.50748	0.152232	23.0404	1.83573e-117	1.28096e-115
DISP2	5.63539	-5.35444	1.39289	-3.84411	0.00012099	0.000196551
DKC1	310.345	-1.04919	0.161999	-6.4765	9.38753e-11	2.40592e-10
DKK1	284.86	-5.80473	0.385265	-15.0669	2.67542e-51	3.79108e-50
DKK2	9.99502	-6.14987	1.3962	-4.40473	1.05914e-05	1.87822e-05
DKK3	7060.49	-3.55201	0.193538	-18.3531	3.12065e-75	8.4356e-74
DKKL1	31.3764	4.55489	0.649016	7.01816	2.24814e-12	6.41211e-12
DLG3	171.643	-6.40584	0.51713	-12.3873	3.06211e-35	2.55751e-34
DLG4	125.697	-1.41544	0.231424	-6.11625	9.58034e-10	2.30566e-09
DLGAP3	14.5041	6.14789	1.27469	4.82304	1.41389e-06	2.67996e-06
DLGAP5	226.001	-1.77017	0.307814	-5.75076	8.88425e-09	1.99343e-08
DLL4	544.676	-7.02559	0.763714	-9.19925	3.60457e-20	1.6023e-19
DMD	61.7849	-1.36092	0.290215	-4.68936	2.74055e-06	5.08693e-06
DMPK	316.131	-2.8399	0.237682	-11.9483	6.62572e-33	5.13376e-32
DMXL2	466.894	-1.85111	0.144666	-12.7957	1.73308e-37	1.56747e-36
DND1	17.9567	7.40624	1.25869	5.88409	4.00243e-09	9.20781e-09
DNHD1	89.044	-2.87203	0.316547	-9.073	1.15784e-19	5.01021e-19
DNLZ	70.1163	3.01483	0.279795	10.7752	4.51016e-27	2.80036e-26
DNM1	82.7512	-4.15044	0.422249	-9.82936	8.41485e-23	4.2596e-22
DNM3	24.241	1.71038	0.466463	3.6667	0.000245701	0.000387962
DNMBP	503.653	-2.19001	0.174616	-12.5419	4.40296e-36	3.80997e-35
DNMT1	550.473	-1.72116	0.174756	-9.84893	6.92786e-23	3.52621e-22
DNPH1	91.8996	-3.04449	0.420903	-7.23324	4.71621e-13	1.40387e-12
DOC2A	14.1244	2.53711	0.659399	3.84761	0.000119274	0.000193869
DOC2B	175.227	10.9848	1.19448	9.19627	3.706e-20	1.64617e-19
DOCK3	73.9511	1.51752	0.271043	5.59882	2.15813e-08	4.70088e-08
DOCK5	212.655	-1.71631	0.214278	-8.00971	1.14981e-15	3.99885e-15
DOCK6	111.257	-1.00727	0.243035	-4.14456	3.40468e-05	5.79781e-05
DOCK8	84.4371	7.20514	0.861222	8.36619	5.95126e-17	2.20795e-16
DOK3	9.5337	-5.20906	1.32467	-3.93235	8.41192e-05	0.000138453
DOK5	49.0368	2.65918	0.479599	5.54458	2.94653e-08	6.35933e-08
DOLK	621.654	-1.47369	0.123982	-11.8863	1.39413e-32	1.0644e-31
DPF3	63.201	-4.85931	0.620781	-7.82774	4.96733e-15	1.6653e-14
DPH3	265.868	-1.10503	0.180956	-6.10666	1.01736e-09	2.44452e-09
DPH6	61.8635	1.89787	0.3038	6.24711	4.18127e-10	1.03152e-09
DPH7	250.622	-2.64698	0.185869	-14.2411	5.09318e-46	6.10063e-45
DPM2	454.311	1.01739	0.128126	7.94059	2.01228e-15	6.89054e-15
DPM3	341.423	1.81069	0.161193	11.2331	2.80594e-29	1.89302e-28
DPP4	529.123	-5.86975	0.227043	-25.853	2.25225e-147	2.59918e-145
DPT	51.7216	8.74536	1.23452	7.08399	1.4006e-12	4.04379e-12
DPY19L2	24.1229	-7.82601	1.24549	-6.28349	3.31057e-10	8.21279e-10
DPY19L3	1157.62	1.34427	0.155996	8.61732	6.85404e-18	2.68655e-17
DPYSL2	1427.64	-3.68207	0.158851	-23.1795	7.33216e-119	5.1765e-117
DPYSL3	7927.44	1.87387	0.163862	11.4357	2.77295e-30	1.94967e-29
DRAM1	461.932	-7.23314	0.454393	-15.9182	4.73561e-57	7.85039e-56
DRAP1	361.374	-2.58124	0.212831	-12.1281	7.49385e-34	5.99608e-33
DRC1	30.5745	8.11098	1.24701	6.50436	7.80228e-11	2.00864e-10
DRD3	190.691	10.8151	1.19965	9.01521	1.96488e-19	8.38639e-19
DROSHA	169.935	-1.09806	0.178002	-6.16879	6.88129e-10	1.67117e-09
DRP2	151.749	-3.12929	0.304148	-10.2887	7.9223e-25	4.41837e-24
DSC2	18.2039	7.33971	1.27154	5.77229	7.82023e-09	1.7626e-08
DSG2	38.8294	-7.81551	1.258	-6.21263	5.21049e-10	1.27625e-09
DSTN	11691.5	2.43569	0.105589	23.0676	9.80469e-118	6.88163e-116
DTD1	463.077	-1.47051	0.155631	-9.44868	3.43115e-21	1.60673e-20
DTD2	261.864	1.82108	0.189473	9.61133	7.16162e-22	3.48273e-21
DTL	180.513	-2.83533	0.288423	-9.83047	8.323e-23	4.21488e-22
DTWD1	174.921	2.19073	0.232149	9.43676	3.84487e-21	1.79557e-20
DTWD2	66.6472	1.12928	0.313446	3.60278	0.000314834	0.000491561
DTX2	183.988	1.13902	0.188012	6.0582	1.37651e-09	3.27795e-09
DTX4	432.058	-2.40778	0.176068	-13.6753	1.42666e-42	1.51932e-41
DTYMK	600.715	-2.20802	0.162688	-13.5721	5.86329e-42	6.10331e-41
DUOX1	12.4878	-5.20361	1.15907	-4.48946	7.1403e-06	1.28425e-05
DUSP10	671.494	-3.83446	0.149373	-25.6704	2.50569e-145	2.83711e-143
DUSP11	253.814	1.05735	0.156356	6.76244	1.3569e-11	3.66791e-11
DUSP18	150.392	1.38252	0.207083	6.67615	2.45303e-11	6.50619e-11
DUSP19	186.543	2.92038	0.257355	11.3477	7.61429e-30	5.25816e-29
DUSP23	234.528	3.42581	0.215057	15.9298	3.93715e-57	6.54482e-56
DUSP4	70.6353	1.50751	0.497031	3.03304	0.00242103	0.0034954
DUSP5	532.724	-2.17833	0.302902	-7.19153	6.40694e-13	1.89306e-12
DUSP7	534.393	1.55356	0.221339	7.01891	2.23602e-12	6.38057e-12
DUSP8	55.3103	2.26254	0.311822	7.25587	3.99094e-13	1.1939e-12
DVL1	697.447	-1.21871	0.142038	-8.58016	9.47435e-18	3.68594e-17
DVL2	464.496	-1.95622	0.179489	-10.8988	1.16759e-27	7.43417e-27
DYM	448.981	1.10279	0.132501	8.32286	8.58663e-17	3.15641e-16
DYNC1I1	13.2868	4.25765	0.881899	4.82783	1.38032e-06	2.61964e-06
DYNC1I2	420.346	1.83107	0.143592	12.7519	3.04334e-37	2.734e-36
DYNLL1	2108.63	1.493	0.106113	14.0699	5.81649e-45	6.67395e-44
DYRK1A	1165.66	1.48647	0.110153	13.4946	1.68209e-41	1.73441e-40
DYRK4	57.0735	-9.0205	1.20797	-7.46747	8.17514e-14	2.55117e-13
DYSF	184.639	7.8958	0.746411	10.5784	3.75512e-26	2.23114e-25
DZIP1	1088.05	1.21681	0.184035	6.61184	3.79561e-11	9.93998e-11
E2F2	48.1223	-1.46513	0.376503	-3.89141	9.96638e-05	0.000162943
E2F4	669.953	-1.55886	0.118715	-13.131	2.1861e-39	2.09398e-38
E2F5	76.009	1.23316	0.298234	4.13489	3.55131e-05	6.03551e-05
E2F7	288.74	-3.65213	0.375717	-9.72044	2.46722e-22	1.2221e-21
E2F8	54.8115	1.54796	0.317146	4.88091	1.05595e-06	2.02355e-06
E4F1	299.627	-1.90139	0.176514	-10.7718	4.67515e-27	2.8998e-26
EAF1	544.469	1.28814	0.133167	9.67309	3.92355e-22	1.92915e-21
EBAG9	116.37	1.11451	0.235731	4.7279	2.26855e-06	4.23439e-06
EBF1	55.8618	1.05521	0.345524	3.05395	0.0022585	0.00326899
EBPL	190.574	-1.97885	0.212284	-9.3217	1.14495e-20	5.2409e-20
ECE1	2291.45	-2.50923	0.110297	-22.7497	1.44577e-114	9.27919e-113
ECE2	88.7692	1.49528	0.241789	6.18421	6.24155e-10	1.52196e-09
ECH1	196.527	1.07944	0.203928	5.29322	1.20182e-07	2.47796e-07
ECHDC2	169.022	-1.01217	0.237848	-4.25555	2.08537e-05	3.61164e-05
ECHDC3	124.794	-1.43572	0.211896	-6.77558	1.2391e-11	3.35627e-11
ECHS1	437.556	-1.69385	0.148652	-11.3948	4.43958e-30	3.1015e-29
ECI1	57.0418	-2.88131	0.36673	-7.85676	3.9419e-15	1.32783e-14
ECM1	829.189	-3.5391	0.151126	-23.4183	2.78133e-121	2.07339e-119
ECM2	157.517	4.7685	0.374886	12.7199	4.58484e-37	4.08214e-36
ECT2	349.479	-2.50219	0.222334	-11.2542	2.20924e-29	1.49298e-28
EDA	45.8577	7.02109	1.06544	6.58984	4.40298e-11	1.14904e-10
EDIL3	1205.69	-1.0819	0.161812	-6.68615	2.29119e-11	6.09055e-11
EDN1	160.678	1.89662	0.369284	5.13594	2.80744e-07	5.6205e-07
EDNRA	126.204	-10.0965	1.20091	-8.40741	4.19167e-17	1.57067e-16
EDNRB	59.3456	-2.02494	0.409589	-4.94383	7.66011e-07	1.48285e-06
EED	137.825	1.09339	0.202648	5.39551	6.83274e-08	1.43669e-07
EEF1A1	66315.4	4.87043	0.167397	29.0951	4.14515e-186	8.29168e-184
EEF1A2	18.0667	-4.40505	0.770503	-5.71711	1.08352e-08	2.4136e-08
EEF1D	982.289	1.32961	0.137576	9.66453	4.2658e-22	2.09485e-21
EEF1E1	153.197	-1.38255	0.184676	-7.48634	7.08225e-14	2.22051e-13
EEF1G	2059.8	14.2481	1.18797	11.9936	3.83667e-33	2.99595e-32
EEF2K	193.497	-1.30013	0.186699	-6.96376	3.31317e-12	9.34101e-12
EEFSEC	126.657	1.14011	0.240518	4.74021	2.13492e-06	3.99366e-06
EEPD1	200.862	-1.08769	0.251445	-4.32577	1.52002e-05	2.66598e-05
EFCAB1	12.2253	4.63312	0.967379	4.78936	1.67315e-06	3.15544e-06
EFCAB10	17.5844	3.32926	0.667324	4.98896	6.07039e-07	1.18466e-06
EFCAB12	7.87733	2.06141	0.851831	2.41998	0.0155213	0.0205745
EFCAB13	11.6468	-3.15884	0.916111	-3.4481	0.000564541	0.000864016
EFCAB2	16.1521	1.5585	0.505739	3.08164	0.00205864	0.00299284
EFCAB6	10.3293	2.44973	0.851262	2.87776	0.00400505	0.00566245
EFEMP2	1408.31	-2.39856	0.116279	-20.6276	1.55153e-94	6.94832e-93
EFHC1	68.9651	-2.3964	0.331125	-7.23713	4.58269e-13	1.36684e-12
EFHD1	422.422	10.5327	1.04715	10.0584	8.43397e-24	4.49288e-23
EFS	215.401	-5.68127	0.3544	-16.0307	7.80517e-58	1.32126e-56
EGFL7	45.3513	-3.17433	0.420116	-7.55582	4.16216e-14	1.32119e-13
EGFL8	21.1944	1.66368	0.519405	3.20306	0.00135977	0.00200984
EGFLAM	84.1305	1.8175	0.312455	5.81683	5.99746e-09	1.36329e-08
EGFR	1173.78	-3.6802	0.143299	-25.682	1.85741e-145	2.12311e-143
EGLN1	960.951	1.38047	0.118557	11.6439	2.46401e-31	1.79448e-30
EGLN2	929.315	2.61107	0.129181	20.2126	7.59089e-91	3.12007e-89
EGLN3	810.39	9.54754	0.532767	17.9207	8.13687e-72	2.01774e-70
EGR1	196.989	-2.59848	0.391561	-6.63619	3.2189e-11	8.46848e-11
EGR2	16.5445	2.27123	0.622924	3.64607	0.000266278	0.000419096
EHD1	1807.07	-1.0075	0.135904	-7.41335	1.23152e-13	3.79967e-13
EHD3	408.002	-3.33832	0.215343	-15.5023	3.34543e-54	5.20101e-53
EHD4	2062.96	2.11148	0.170914	12.354	4.6321e-35	3.84737e-34
EHHADH	47.814	-1.92138	0.381183	-5.04057	4.64154e-07	9.1429e-07
EID1	4089.34	-1.75935	0.111763	-15.7418	7.82091e-56	1.25323e-54
EID3	112.966	1.01304	0.252137	4.01781	5.87421e-05	9.79335e-05
EIF1	2824.64	1.15171	0.0894764	12.8717	6.49967e-38	5.97313e-37
EIF1AD	199.842	1.59222	0.187522	8.49084	2.05147e-17	7.83133e-17
EIF1AX	1160.51	3.56326	0.14278	24.9563	1.82297e-137	1.79338e-135
EIF1B	170.575	-2.68756	0.190382	-14.1167	2.99753e-45	3.47598e-44
EIF2A	463.629	-1.49719	0.141624	-10.5715	4.03857e-26	2.39481e-25
EIF2AK2	834.018	2.92924	0.132051	22.1827	5.04717e-109	2.85737e-107
EIF2AK4	651.05	-1.33408	0.158273	-8.42901	3.48614e-17	1.31203e-16
EIF2B4	192.88	-1.51933	0.169638	-8.95633	3.35655e-19	1.41551e-18
EIF2S2	1221.75	1.43704	0.100775	14.2599	3.89059e-46	4.68824e-45
EIF3A	4211.68	1.02963	0.0964013	10.6807	1.25326e-26	7.616e-26
EIF3F	1430.14	2.64137	0.206055	12.8187	1.28773e-37	1.17231e-36
EIF3G	298.582	-1.06525	0.162127	-6.57048	5.01517e-11	1.30371e-10
EIF3H	853.639	1.4482	0.13826	10.4745	1.13095e-25	6.58598e-25
EIF3K	155.977	1.33462	0.182349	7.31902	2.49793e-13	7.55375e-13
EIF3L	1789.56	2.72419	0.167985	16.2169	3.83249e-59	6.75442e-58
EIF3M	431.509	2.48147	0.154769	16.0334	7.47287e-58	1.2668e-56
EIF4A1	1849.88	4.46335	0.138943	32.1235	2.06997e-226	7.307e-224
EIF4E	536.472	3.11379	0.194635	15.9981	1.31678e-57	2.21344e-56
EIF4E3	348.721	4.1671	0.220185	18.9254	7.04034e-80	2.11245e-78
EIF4EBP3	35.8827	3.99699	0.592208	6.7493	1.48556e-11	4.00127e-11
EIF5	4106.98	1.07646	0.10637	10.12	4.50467e-24	2.42335e-23
EIF5A	1862.45	1.27571	0.131111	9.73004	2.24497e-22	1.11432e-21
ELAC1	148.099	1.70008	0.198941	8.54566	1.27805e-17	4.93697e-17
ELAC2	208.369	-2.80022	0.19127	-14.6402	1.55683e-48	2.03541e-47
ELF1	917.643	1.07391	0.127731	8.40759	4.18506e-17	1.56917e-16
ELFN1	61.3675	1.18566	0.404658	2.93004	0.00338919	0.00482013
ELK1	432.642	-2.02399	0.171998	-11.7676	5.73599e-32	4.26011e-31
ELK3	910.489	-1.20961	0.172373	-7.01741	2.26019e-12	6.44342e-12
ELL2	1743.18	-3.63635	0.247159	-14.7126	5.35091e-49	7.09631e-48
ELL3	63.1919	5.371	0.608213	8.83078	1.03946e-18	4.25062e-18
ELOF1	567.511	1.07096	0.146386	7.31598	2.55518e-13	7.72088e-13
ELOVL1	874.875	-2.31528	0.150219	-15.4127	1.34468e-53	2.05591e-52
ELOVL2	76.4295	-9.10312	1.23007	-7.4005	1.35672e-13	4.17565e-13
ELOVL4	90.5967	-5.7569	0.485234	-11.8642	1.81692e-32	1.38017e-31
ELOVL6	945.333	1.4986	0.197594	7.58422	3.34491e-14	1.06742e-13
ELOVL7	178.917	9.85384	1.21871	8.08547	6.19271e-16	2.18538e-15
ELP6	178.551	-1.59438	0.192006	-8.3038	1.00835e-16	3.6942e-16
EMC10	948.485	1.70008	0.117515	14.4669	1.96031e-47	2.4766e-46
EMC3	1144.63	1.97839	0.109236	18.1111	2.60421e-73	6.70723e-72
EMC6	145.861	2.38504	0.25181	9.47162	2.7554e-21	1.29789e-20
EMC7	689.383	-1.10779	0.128507	-8.62042	6.67085e-18	2.61646e-17
EMCN	58.9414	7.41316	0.898573	8.24992	1.58495e-16	5.76265e-16
EMD	390.68	-1.17865	0.137313	-8.58365	9.19104e-18	3.5792e-17
EME2	391.274	-2.28534	0.165142	-13.8387	1.48958e-43	1.65013e-42
EMG1	181.687	2.09234	0.175118	11.9482	6.63305e-33	5.13612e-32
EMILIN1	4983.42	-1.70143	0.116878	-14.5573	5.25144e-48	6.75539e-47
EMILIN2	1005.95	4.51838	0.20293	22.2656	7.95691e-110	4.61347e-108
EML1	320.428	-1.76566	0.151886	-11.6248	3.0817e-31	2.23754e-30
EML4	897.42	-1.34011	0.129832	-10.3219	5.6115e-25	3.15158e-24
EML5	141.239	3.72569	0.269116	13.8442	1.37993e-43	1.53209e-42
EMP2	106.934	-1.60776	0.284093	-5.65926	1.52023e-08	3.34786e-08
EMP3	315.398	-1.00234	0.157905	-6.34773	2.18521e-10	5.48679e-10
EN1	89.0033	10.0154	1.19732	8.36491	6.01632e-17	2.23139e-16
ENDOV	329.823	2.29887	0.163352	14.0731	5.5566e-45	6.38185e-44
ENG	616.617	-1.64549	0.142734	-11.5284	9.49011e-31	6.77172e-30
ENGASE	194.349	-1.89976	0.206232	-9.21177	3.20798e-20	1.43024e-19
ENHO	20.7238	5.24058	0.924149	5.67071	1.42205e-08	3.13971e-08
ENO3	36.2475	-1.54222	0.355114	-4.34287	1.40632e-05	2.47125e-05
ENO4	10.4774	2.38274	0.713789	3.33815	0.000843387	0.00126974
ENOSF1	51.6026	-7.58741	1.21609	-6.23917	4.39912e-10	1.08415e-09
ENOX1	76.6921	3.03056	0.320142	9.46632	2.89884e-21	1.36439e-20
ENOX2	40.1385	-8.37088	1.21633	-6.88207	5.89898e-12	1.63283e-11
ENPEP	129.726	8.27423	0.890703	9.28955	1.54942e-20	7.03864e-20
ENPP4	208.596	5.49382	0.334201	16.4387	1.01137e-60	1.84755e-59
ENPP5	12.5075	4.27862	1.01975	4.19574	2.71982e-05	4.66866e-05
ENSA	991.386	1.14212	0.107977	10.5774	3.79425e-26	2.25327e-25
ENTPD1	306.713	5.54905	0.307126	18.0677	5.72809e-73	1.45654e-71
ENTPD3	10.1466	3.78856	1.00634	3.76469	0.000166759	0.000267537
ENTPD4	625.304	-1.51411	0.12836	-11.7958	4.10371e-32	3.07062e-31
ENTPD6	415.816	-1.70601	0.145784	-11.7023	1.24034e-31	9.12166e-31
ENTPD8	12.0817	4.13834	1.03769	3.98802	6.66259e-05	0.000110662
ENY2	149.918	1.10875	0.215992	5.1333	2.84706e-07	5.69317e-07
EP300	516.835	-1.17897	0.125195	-9.4171	4.63729e-21	2.15724e-20
EPB41L1	79.269	-1.99361	0.278018	-7.17078	7.45709e-13	2.19363e-12
EPB41L3	242.581	-1.67448	0.225792	-7.41605	1.20668e-13	3.72685e-13
EPB41L4B	22.3876	2.01323	0.527528	3.81634	0.000135444	0.000218995
EPB41L5	512.224	-3.09382	0.158751	-19.4885	1.37333e-84	4.66932e-83
EPG5	1350.24	-2.56833	0.145487	-17.6533	9.59872e-70	2.23697e-68
EPHA1	69.4959	1.50038	0.327349	4.58342	4.57431e-06	8.35757e-06
EPHA3	51.1841	8.05385	1.21355	6.63658	3.21046e-11	8.44813e-11
EPHB2	2091.57	1.28019	0.160898	7.95654	1.7691e-15	6.08912e-15
EPHB3	373.765	2.49677	0.314852	7.92998	2.1918e-15	7.48819e-15
EPHB4	515.909	-3.11612	0.239198	-13.0274	8.55208e-39	8.04405e-38
EPHB6	39.7597	3.72585	0.501848	7.42425	1.13417e-13	3.50833e-13
EPHX1	426.765	2.05424	0.162932	12.6079	1.90937e-36	1.66664e-35
EPHX2	25.0257	6.27891	1.09055	5.75757	8.53315e-09	1.9168e-08
EPHX3	6.65659	4.11096	1.24204	3.30984	0.000933505	0.00139927
EPHX4	32.486	-8.66899	1.24421	-6.96744	3.22756e-12	9.11034e-12
EPM2A	24.2419	-1.44865	0.470677	-3.0778	0.00208534	0.00303006
EPM2AIP1	433.955	-1.53839	0.150878	-10.1962	2.06142e-24	1.12768e-23
EPN1	1099.31	1.60385	0.110315	14.5388	6.88025e-48	8.81288e-47
EPN3	14.5768	-1.83654	0.626924	-2.92946	0.00339557	0.00482862
EPOR	79.9821	-1.07087	0.321524	-3.33062	0.000866532	0.00130246
EPS8L2	74.4457	-4.80484	0.511845	-9.3873	6.15565e-21	2.85141e-20
ERAP2	847.626	5.33339	0.220666	24.1695	4.66023e-129	3.99515e-127
ERBB2	528.544	-1.19455	0.120948	-9.87654	5.26167e-23	2.69299e-22
ERCC1	339.839	1.23371	0.161941	7.61826	2.5711e-14	8.29524e-14
ERCC6	231.173	2.43802	0.172886	14.1019	3.69666e-45	4.26609e-44
ERCC6L	186.612	-1.89939	0.308665	-6.15358	7.57524e-10	1.83562e-09
ERCC6L2	944.516	1.31405	0.113516	11.5758	5.46311e-31	3.92389e-30
EREG	65.9775	-7.1146	1.23351	-5.76778	8.03244e-09	1.81009e-08
ERGIC1	1183.85	-4.8278	0.212245	-22.7464	1.5593e-114	9.95465e-113
ERI1	278.034	-1.18404	0.185237	-6.39199	1.63737e-10	4.14419e-10
ERI2	201.704	1.0887	0.202724	5.37038	7.85703e-08	1.64458e-07
ERICH1	116.987	1.09159	0.20964	5.207	1.91916e-07	3.88231e-07
ERICH2	4.26262	4.85001	1.45764	3.32731	0.000876898	0.00131771
ERICH5	72.3355	1.94269	0.422914	4.59357	4.35724e-06	7.97311e-06
ERMAP	93.4296	-4.56314	0.422864	-10.791	3.79503e-27	2.36367e-26
ERN1	455.214	2.38306	0.150305	15.8548	1.30218e-56	2.13216e-55
ERO1B	204.02	2.36007	0.192411	12.2658	1.38288e-34	1.13447e-33
ERP44	534.737	1.44327	0.13791	10.4653	1.24618e-25	7.21151e-25
ERRFI1	740.583	-2.85617	0.157217	-18.167	9.41822e-74	2.45734e-72
ESD	199.748	-1.62829	0.19945	-8.16389	3.24405e-16	1.1612e-15
ESR1	35.8796	3.34499	0.43571	7.6771	1.6273e-14	5.30728e-14
ESR2	18.3994	2.42275	0.529265	4.57758	4.70392e-06	8.58466e-06
ESRRG	5.79745	-5.03157	1.46588	-3.43246	0.000598139	0.00091369
ESYT1	3267.1	1.2658	0.143037	8.84945	8.79491e-19	3.61495e-18
ESYT2	3492.59	2.37128	0.102126	23.2193	2.90983e-119	2.07879e-117
ETAA1	270.957	-1.57587	0.164904	-9.55628	1.22071e-21	5.87212e-21
ETFB	224.609	3.59754	0.219453	16.3933	2.13665e-60	3.86788e-59
ETS2	1165.04	-2.91803	0.147652	-19.7629	6.21042e-87	2.27248e-85
ETV5	473.922	-1.20679	0.2204	-5.47545	4.36395e-08	9.29313e-08
ETV6	332.635	1.72677	0.146201	11.8109	3.42682e-32	2.57215e-31
ETV7	35.1932	2.68331	0.426772	6.28745	3.22726e-10	8.01108e-10
EVA1A	152.788	-1.49792	0.261301	-5.73254	9.894e-09	2.21114e-08
EVA1C	158.124	6.20707	0.437803	14.1778	1.25795e-45	1.4831e-44
EVL	332.647	2.58402	0.244392	10.5733	3.96494e-26	2.35231e-25
EVPL	13.3418	4.08181	0.905015	4.51021	6.47633e-06	1.16956e-05
EXD1	14.7409	7.31912	1.27045	5.76102	8.36073e-09	1.88054e-08
EXO5	245.331	2.43018	0.226164	10.7452	6.23948e-27	3.84624e-26
EXOC3L1	31.8136	1.52846	0.384311	3.97715	6.97475e-05	0.000115575
EXOC3L4	8.42574	4.26636	1.21727	3.50485	0.000456869	0.000704347
EXOC6	103.904	-2.41727	0.255609	-9.4569	3.17208e-21	1.49007e-20
EXOC6B	731.237	-1.05225	0.115911	-9.07813	1.10454e-19	4.78753e-19
EXOSC1	111.908	-1.2095	0.207336	-5.83353	5.42674e-09	1.23707e-08
EXOSC10	160.448	-1.77032	0.203238	-8.71056	3.02372e-18	1.21252e-17
EXOSC2	226.053	-1.1507	0.158686	-7.25145	4.12337e-13	1.23229e-12
EXOSC3	205.562	-1.58252	0.184792	-8.56381	1.092e-17	4.23463e-17
EXOSC7	112.189	-1.92236	0.227113	-8.46434	2.57609e-17	9.77807e-17
EXOSC8	39.3659	-1.27103	0.418099	-3.04003	0.00236557	0.0034182
EXPH5	34.1277	-5.83157	0.91934	-6.34322	2.25018e-10	5.64638e-10
EXTL1	23.7531	-4.47612	0.793912	-5.63805	1.71984e-08	3.76669e-08
EXTL3	1314.57	-1.38283	0.139484	-9.91389	3.62246e-23	1.87158e-22
EYA3	378.813	-1.10012	0.145416	-7.56532	3.8691e-14	1.23012e-13
EYA4	233.7	-10.6829	1.19261	-8.95756	3.31957e-19	1.4004e-18
EYS	4.38968	-4.25901	1.43593	-2.96603	0.00301676	0.00431448
EZH1	272.275	-1.65973	0.164765	-10.0733	7.24998e-24	3.86558e-23
F10	54.0966	-9.37251	1.21725	-7.69976	1.36322e-14	4.474e-14
F11R	70.5356	5.01615	0.416698	12.0379	2.24675e-33	1.76823e-32
F13A1	9.31119	4.24581	1.09201	3.88809	0.000101036	0.000165097
F13B	5.64852	5.73762	1.39642	4.10881	3.977e-05	6.72945e-05
F2R	4979.45	-1.45321	0.156684	-9.27479	1.77975e-20	8.06363e-20
F2RL1	135.394	-4.76535	0.327084	-14.5692	4.41206e-48	5.70006e-47
F2RL2	180.084	-7.5392	0.811389	-9.29172	1.51817e-20	6.90454e-20
FAAH	128.245	4.57525	0.381658	11.9878	4.11609e-33	3.21205e-32
FAAH2	50.0762	8.92441	1.21837	7.32488	2.39116e-13	7.23802e-13
FABP3	44.7472	-2.40331	0.436321	-5.50811	3.62705e-08	7.77633e-08
FABP5	7.51493	1.80828	0.752984	2.40149	0.0163286	0.0215879
FADD	330.304	1.35883	0.152571	8.9062	5.28139e-19	2.19561e-18
FADS3	809.784	1.52074	0.157636	9.64717	5.05321e-22	2.47142e-21
FAF2	736.208	-1.6445	0.138943	-11.8358	2.55005e-32	1.92126e-31
FAH	58.2585	-2.79619	0.356214	-7.84975	4.16875e-15	1.40228e-14
FAIM	41.0418	-1.66991	0.344946	-4.84108	1.29134e-06	2.45659e-06
FAM101B	406.961	-1.24941	0.138462	-9.0235	1.82172e-19	7.80311e-19
FAM102B	1053.01	1.56768	0.116068	13.5066	1.4293e-41	1.47628e-40
FAM103A1	103.893	3.3654	0.312825	10.7581	5.42911e-27	3.35877e-26
FAM105A	22.3814	2.64987	0.60982	4.34533	1.39064e-05	2.44442e-05
FAM107B	848.658	-2.04854	0.119483	-17.145	6.84743e-66	1.43676e-64
FAM109B	159.279	-2.00524	0.220377	-9.09917	9.10209e-20	3.96239e-19
FAM110B	75.5959	1.51434	0.437238	3.46343	0.000533345	0.000817627
FAM114A2	435.691	2.0453	0.133427	15.3289	4.89923e-53	7.35007e-52
FAM117A	61.687	1.29993	0.317723	4.09138	4.2881e-05	7.24156e-05
FAM117B	206.506	1.5872	0.229074	6.92877	4.24512e-12	1.18709e-11
FAM118A	700.645	3.23193	0.149593	21.6049	1.61567e-103	8.25162e-102
FAM118B	168.135	-1.34634	0.217094	-6.20167	5.58663e-10	1.36532e-09
FAM122A	391.882	1.61189	0.157637	10.2253	1.52781e-24	8.40752e-24
FAM122C	14.6182	1.11919	0.533435	2.09808	0.0358978	0.0456792
FAM126A	4480.58	1.96146	0.109708	17.8789	1.72237e-71	4.21017e-70
FAM126B	439.317	1.05539	0.195486	5.39879	6.7093e-08	1.41247e-07
FAM129B	8284.71	-1.10228	0.157937	-6.97922	2.96834e-12	8.39641e-12
FAM129C	17.399	2.43337	0.667435	3.64586	0.000266503	0.000419374
FAM131A	148.019	-2.03881	0.219467	-9.28983	1.54538e-20	7.02295e-20
FAM132B	51.1269	-1.5019	0.349449	-4.29791	1.72417e-05	3.01127e-05
FAM133B	177.775	2.318	0.202805	11.4297	2.97093e-30	2.08643e-29
FAM134B	15.1683	2.77306	0.621115	4.46465	8.02005e-06	1.43602e-05
FAM13C	86.2387	4.94093	0.404709	12.2086	2.79746e-34	2.27782e-33
FAM149A	274.315	5.24051	0.290532	18.0376	9.87095e-73	2.49939e-71
FAM151A	129.203	6.46315	0.544112	11.8784	1.53348e-32	1.16782e-31
FAM151B	177.657	4.00977	0.24703	16.2319	2.99957e-59	5.30986e-58
FAM155A	400.423	-3.51321	0.193506	-18.1555	1.16139e-73	3.0171e-72
FAM155B	105.124	9.01137	1.19483	7.54196	4.62958e-14	1.4653e-13
FAM156A	27.673	-1.60027	0.411101	-3.89264	9.91587e-05	0.000162139
FAM159B	51.6991	8.93233	1.21717	7.33863	2.15788e-13	6.55171e-13
FAM160B2	663.597	-1.84326	0.176905	-10.4195	2.02028e-25	1.15574e-24
FAM161A	134.749	2.08642	0.221651	9.41311	4.81666e-21	2.23894e-20
FAM161B	103.32	1.98427	0.250604	7.91796	2.41436e-15	8.22514e-15
FAM162A	128.215	3.08441	0.237266	12.9998	1.22655e-38	1.1465e-37
FAM162B	16.0568	-6.50596	1.26745	-5.13312	2.84974e-07	5.69757e-07
FAM166B	17.684	2.88629	0.583406	4.9473	7.52481e-07	1.4583e-06
FAM167A	41.8505	-5.76113	0.701156	-8.21662	2.09322e-16	7.56485e-16
FAM167B	11.1641	-4.25742	0.869846	-4.89446	9.85777e-07	1.8924e-06
FAM168A	827.742	-1.01623	0.112161	-9.06049	1.29869e-19	5.60477e-19
FAM168B	1522.8	-1.20965	0.104549	-11.5702	5.83607e-31	4.18426e-30
FAM169A	138.157	4.41557	0.311202	14.1888	1.07532e-45	1.26902e-44
FAM169B	57.3901	9.65824	1.22972	7.85402	4.02899e-15	1.35565e-14
FAM171A1	825.323	-1.30949	0.120956	-10.8261	2.58938e-27	1.62796e-26
FAM171B	2915.03	1.91361	0.211333	9.05494	1.36638e-19	5.89266e-19
FAM174B	30.1826	3.49744	0.517793	6.75451	1.43316e-11	3.86621e-11
FAM175A	263.973	2.14327	0.184768	11.5998	4.13069e-31	2.98115e-30
FAM175B	429.094	-1.03526	0.147425	-7.0223	2.18253e-12	6.2309e-12
FAM180A	382.554	1.96225	0.307936	6.37227	1.86253e-10	4.69525e-10
FAM184A	35.6933	5.76532	0.790035	7.29756	2.93033e-13	8.83219e-13
FAM184B	21.4747	1.82517	0.565129	3.22965	0.00123943	0.00183809
FAM185A	70.0013	2.46705	0.324848	7.59448	3.09026e-14	9.90898e-14
FAM188B	42.99	2.4596	0.396406	6.20475	5.47836e-10	1.33968e-09
FAM189A2	556.872	11.5971	1.19103	9.73702	2.09604e-22	1.04255e-21
FAM189B	216.99	-1.41479	0.160755	-8.80091	1.35714e-18	5.51963e-18
FAM193A	240.575	-1.17594	0.158609	-7.41405	1.22502e-13	3.78057e-13
FAM195A	137.478	-2.16469	0.213809	-10.1244	4.3069e-24	2.31904e-23
FAM196A	39.1478	-1.81556	0.368877	-4.92187	8.57216e-07	1.65221e-06
FAM196B	110.606	-5.00053	0.440628	-11.3487	7.53125e-30	5.2068e-29
FAM198A	123.616	5.9476	0.451186	13.1821	1.11194e-39	1.07193e-38
FAM198B	539.173	1.20364	0.329	3.65849	0.000253705	0.000399917
FAM199X	425.038	-1.60917	0.175678	-9.15976	5.20138e-20	2.29849e-19
FAM204A	785.42	3.44857	0.152917	22.5519	1.28776e-112	7.88554e-111
FAM206A	303.271	1.78618	0.178264	10.0198	1.24701e-23	6.56432e-23
FAM20C	1245.39	-2.09074	0.190376	-10.9822	4.65533e-28	3.00071e-27
FAM210A	348.481	1.04075	0.149092	6.98064	2.93845e-12	8.31382e-12
FAM212A	54.3034	-1.29755	0.298556	-4.34607	1.38598e-05	2.43729e-05
FAM212B	516.97	2.25692	0.130289	17.3225	3.18281e-67	6.97081e-66
FAM213A	223.781	2.38962	0.174586	13.6874	1.20791e-42	1.2898e-41
FAM216A	54.2243	-2.10131	0.349423	-6.01365	1.81388e-09	4.2779e-09
FAM219B	260.953	1.64772	0.164124	10.0395	1.02193e-23	5.40554e-23
FAM220A	256.361	-1.11049	0.196641	-5.64731	1.62982e-08	3.57803e-08
FAM228B	31.8094	2.25623	0.446681	5.0511	4.39272e-07	8.66273e-07
FAM229A	14.2041	-4.93851	1.0113	-4.88333	1.0431e-06	1.99957e-06
FAM229B	163.778	1.58081	0.233365	6.77399	1.25275e-11	3.39095e-11
FAM26E	497.148	2.75856	0.146867	18.7827	1.04681e-78	3.07182e-77
FAM3A	270.656	-1.43608	0.161882	-8.87115	7.23916e-19	2.98572e-18
FAM3C	243.333	1.81604	0.206761	8.78328	1.58782e-18	6.44203e-18
FAM43A	405.026	-2.23862	0.244692	-9.14871	5.76149e-20	2.53759e-19
FAM45A	265.869	1.00829	0.190972	5.27977	1.29344e-07	2.65775e-07
FAM46C	839.191	-2.42915	0.472887	-5.13685	2.79387e-07	5.59427e-07
FAM47E	16.9305	4.4591	0.867704	5.13897	2.76251e-07	5.53425e-07
FAM49A	75.7583	-3.10512	0.327382	-9.4847	2.43081e-21	1.15042e-20
FAM49B	197.275	1.16971	0.1754	6.6688	2.57905e-11	6.82703e-11
FAM50A	168.442	-1.44886	0.195851	-7.39776	1.385e-13	4.26006e-13
FAM50B	54.5477	-5.01649	0.549358	-9.13156	6.75163e-20	2.96065e-19
FAM53A	233.499	4.35632	0.243589	17.8839	1.57395e-71	3.86309e-70
FAM57A	334.218	-2.12703	0.149324	-14.2443	4.86185e-46	5.84103e-45
FAM58A	147.297	-2.0233	0.196974	-10.2719	9.43228e-25	5.23618e-24
FAM63A	275.562	1.28285	0.178508	7.18652	6.64648e-13	1.96142e-12
FAM63B	977.017	-1.30476	0.108923	-11.9788	4.58991e-33	3.57715e-32
FAM64A	219.69	-1.97537	0.255469	-7.73235	1.05582e-14	3.48512e-14
FAM65B	151.054	-8.87913	1.05807	-8.39179	4.78799e-17	1.78631e-16
FAM65C	727.722	-4.42429	0.306522	-14.4338	3.16906e-47	3.98691e-46
FAM69A	674.506	-4.38202	0.162766	-26.9222	1.20698e-159	1.68443e-157
FAM69B	84.753	2.35975	0.274095	8.60927	7.35273e-18	2.87545e-17
FAM71E1	38.1938	5.35509	0.881563	6.07454	1.24342e-09	2.97223e-09
FAM71F1	75.8236	8.50154	1.20703	7.04337	1.8765e-12	5.37898e-12
FAM71F2	11.2784	1.84213	0.600655	3.06686	0.00216319	0.00313824
FAM72A	10.6398	2.27766	0.692888	3.2872	0.0010119	0.00150962
FAM73B	306.104	-1.59794	0.227691	-7.01801	2.25057e-12	6.41753e-12
FAM78A	30.3082	1.27009	0.399466	3.17947	0.00147546	0.00217308
FAM78B	22.1733	6.15594	1.09677	5.61279	1.99088e-08	4.34604e-08
FAM81A	25.8386	7.8081	1.23673	6.31352	2.72757e-10	6.81012e-10
FAM83D	299.848	-1.40832	0.297744	-4.72998	2.24547e-06	4.19261e-06
FAM83G	247.918	-4.26747	0.283432	-15.0564	3.13369e-51	4.43521e-50
FAM83H	79.5845	3.60629	0.347135	10.3887	2.79047e-25	1.58426e-24
FAM84A	20.9191	-3.54573	0.715398	-4.9563	7.18481e-07	1.39511e-06
FAM84B	169.12	5.97041	0.403277	14.8047	1.36514e-49	1.85343e-48
FAM89B	347.456	2.24642	0.163816	13.7131	8.4753e-43	9.11474e-42
FAM91A1	1619.8	1.44268	0.130371	11.066	1.83396e-28	1.20346e-27
FAM98A	853.392	-2.28593	0.143556	-15.9236	4.34642e-57	7.21517e-56
FANCA	166.637	1.3614	0.207525	6.56015	5.37527e-11	1.3955e-10
FANCB	71.7085	-2.07334	0.349733	-5.92836	3.05972e-09	7.11267e-09
FANCE	257.188	1.33632	0.18139	7.36712	1.74349e-13	5.32181e-13
FANCG	126.28	-3.19941	0.239645	-13.3506	1.17519e-40	1.17343e-39
FANCM	165.292	-1.20565	0.317629	-3.79577	0.000147184	0.00023721
FAP	173.064	-5.47334	0.33561	-16.3086	8.57056e-60	1.53988e-58
FAR2	93.6336	-2.02353	0.285666	-7.08356	1.40499e-12	4.05255e-12
FARP1	1358.14	1.56238	0.158059	9.88482	4.84466e-23	2.48273e-22
FARSA	249.992	-1.55768	0.157329	-9.90078	4.13051e-23	2.12583e-22
FASTKD2	349.151	-1.5643	0.140617	-11.1246	9.52532e-29	6.32317e-28
FASTKD5	331.341	-1.52704	0.150215	-10.1657	2.82051e-24	1.53037e-23
FAT3	448.92	3.70515	0.237126	15.6253	4.89811e-55	7.74534e-54
FAU	1221.6	2.46509	0.139067	17.7259	2.6453e-70	6.28691e-69
FAXC	91.7792	3.17206	0.299204	10.6017	2.92693e-26	1.75207e-25
FAXDC2	298.406	1.14461	0.280167	4.08545	4.39907e-05	7.42061e-05
FBF1	177.534	1.61274	0.208537	7.7336	1.04546e-14	3.45283e-14
FBLIM1	1884	1.07016	0.149331	7.16632	7.70389e-13	2.26235e-12
FBLN1	672.773	-3.28588	0.257238	-12.7737	2.2997e-37	2.0737e-36
FBLN5	673.563	-4.31487	0.197707	-21.8246	1.35601e-105	7.10691e-104
FBLN7	29.0795	1.13846	0.445876	2.55331	0.0106706	0.0144091
FBN1	5501.92	1.01679	0.214524	4.73974	2.13996e-06	4.00183e-06
FBN2	1229.69	-6.47001	0.322438	-20.0659	1.46495e-89	5.76469e-88
FBRS	354.604	-1.06814	0.134223	-7.95794	1.74934e-15	6.02283e-15
FBXL12	232.077	-2.47117	0.179427	-13.7726	3.72681e-43	4.05156e-42
FBXL13	8.65519	-1.95346	0.819989	-2.3823	0.0172051	0.0227018
FBXL15	151.764	1.03497	0.21789	4.74995	2.0347e-06	3.81332e-06
FBXL16	109.199	4.48812	0.802771	5.59078	2.26047e-08	4.91667e-08
FBXL17	386.113	1.20603	0.132532	9.09994	9.03845e-20	3.93755e-19
FBXL21	9.90836	5.5478	1.34186	4.13442	3.55846e-05	6.04681e-05
FBXL3	885.412	-1.26014	0.106777	-11.8016	3.82965e-32	2.86734e-31
FBXL7	623.481	2.07821	0.129429	16.0567	5.1289e-58	8.7439e-57
FBXL8	75.8438	2.5528	0.323276	7.89667	2.86464e-15	9.71774e-15
FBXO10	687.468	4.067	0.189302	21.4842	2.18657e-102	1.08893e-100
FBXO11	191.311	1.8257	0.217807	8.38221	5.19453e-17	1.93437e-16
FBXO16	10.4872	6.61314	1.33225	4.96389	6.90968e-07	1.34278e-06
FBXO17	36.9075	-2.37602	0.426363	-5.57277	2.50715e-08	5.43155e-08
FBXO22	631.285	2.68051	0.122405	21.8987	2.67504e-106	1.42693e-104
FBXO25	379.005	3.52904	0.175336	20.1273	4.25662e-90	1.70293e-88
FBXO3	341.837	2.13809	0.159417	13.4119	5.14968e-41	5.21573e-40
FBXO32	2858.45	3.58511	0.581227	6.16817	6.90855e-10	1.67711e-09
FBXO36	14.0298	-2.99675	0.706425	-4.24214	2.21401e-05	3.82725e-05
FBXO41	42.0827	-7.34119	1.22377	-5.99883	1.98745e-09	4.67347e-09
FBXO44	94.7573	-3.2789	0.327664	-10.0069	1.42151e-23	7.46322e-23
FBXO48	19.7334	1.55823	0.459521	3.39099	0.000696418	0.00105843
FBXO5	221.417	-1.89494	0.261469	-7.24729	4.25205e-13	1.27011e-12
FBXO6	204.886	1.99737	0.18418	10.8446	2.11459e-27	1.33435e-26
FBXO7	709.954	-2.22642	0.152344	-14.6144	2.27484e-48	2.95483e-47
FBXW5	1026.42	-1.99698	0.115913	-17.2282	1.63063e-66	3.48235e-65
FBXW9	72.0173	1.09337	0.270172	4.04695	5.18895e-05	8.70653e-05
FCER2	7.86901	4.9455	1.34333	3.68151	0.000231854	0.000367064
FCF1	114.35	2.95625	0.281846	10.4889	9.71633e-26	5.6692e-25
FCGR1A	6.85321	3.7093	1.23728	2.99794	0.00271813	0.00390181
FCGRT	1255.85	1.0746	0.12242	8.77801	1.6639e-18	6.7421e-18
FCRL5	15.0485	7.83002	1.2739	6.14651	7.92044e-10	1.91617e-09
FCRLB	23.2521	-6.16516	1.10505	-5.57907	2.41809e-08	5.24336e-08
FDPS	583.668	2.16412	0.234095	9.24462	2.36085e-20	1.06203e-19
FDX1	162.878	1.14363	0.185477	6.16587	7.00984e-10	1.70033e-09
FDX1L	59.3294	8.20905	1.20326	6.82236	8.95586e-12	2.4496e-11
FDXACB1	64.1295	2.29959	0.311376	7.38526	1.52158e-13	4.66463e-13
FDXR	166.245	-2.05808	0.200707	-10.2541	1.13374e-24	6.26767e-24
FEM1A	912.527	6.97836	0.224798	31.0427	1.42957e-211	4.18481e-209
FEN1	591.967	-1.45508	0.265129	-5.48817	4.06115e-08	8.67448e-08
FER	924.075	1.05498	0.105526	9.99734	1.56549e-23	8.18695e-23
FER1L5	78.7242	2.78249	0.350221	7.94498	1.94222e-15	6.66587e-15
FERMT1	36.9639	-5.7433	0.8865	-6.47863	9.25592e-11	2.37371e-10
FERMT2	3552.3	1.52245	0.154739	9.83886	7.65759e-23	3.88939e-22
FERMT3	14.2666	-3.7865	0.801446	-4.72459	2.30584e-06	4.30198e-06
FES	75.9732	-1.50949	0.300286	-5.02683	4.98651e-07	9.7871e-07
FGD6	312.601	1.22924	0.215182	5.71256	1.11291e-08	2.4763e-08
FGF1	195.349	-3.0851	0.265183	-11.6338	2.77308e-31	2.01835e-30
FGF10	67.0666	2.42616	0.319377	7.59652	3.0421e-14	9.75975e-14
FGF11	17.801	8.04332	1.28177	6.27515	3.49298e-10	8.65995e-10
FGF13	12.6395	1.86659	0.71253	2.61966	0.00880163	0.0119885
FGF14	13.7356	-4.44275	1.11622	-3.98018	6.88633e-05	0.000114189
FGF22	7.11735	3.62023	1.07821	3.35763	0.000786133	0.00118786
FGF5	573.452	-11.9595	1.20766	-9.90311	4.03542e-23	2.07957e-22
FGF7	583.284	-4.24513	0.586134	-7.24258	4.40213e-13	1.31461e-12
FGF9	8.38742	-5.55515	1.37373	-4.04384	5.25824e-05	8.81663e-05
FGFBP1	42.2269	8.70196	1.24067	7.01392	2.3173e-12	6.59684e-12
FGFR1OP	212.046	2.48472	0.199489	12.4554	1.30658e-35	1.10902e-34
FGFR2	128.005	8.62512	1.05932	8.14211	3.88435e-16	1.38585e-15
FGFR3	22.4231	2.52924	0.547465	4.61991	3.83915e-06	7.05196e-06
FGFR4	45.3308	-8.08297	1.21348	-6.66099	2.71986e-11	7.18867e-11
FGL2	373.841	-6.75902	1.05673	-6.39616	1.59333e-10	4.03527e-10
FHDC1	48.325	3.17082	0.404197	7.84473	4.33873e-15	1.45782e-14
FHIT	8.63975	5.6769	1.33856	4.24103	2.22492e-05	3.84444e-05
FHOD3	142.413	-7.08366	0.586812	-12.0714	1.49527e-33	1.18379e-32
FIBCD1	300.653	-11.3383	1.18958	-9.5314	1.55175e-21	7.41699e-21
FIBIN	2218.71	1.67207	0.145729	11.4739	1.78517e-30	1.26405e-29
FILIP1	308.304	5.89248	0.30404	19.3806	1.12562e-83	3.70129e-82
FILIP1L	5647.45	1.01896	0.144619	7.04577	1.8444e-12	5.28948e-12
FIP1L1	156.921	1.71073	0.197971	8.64132	5.55677e-18	2.19023e-17
FITM2	436.41	1.32728	0.135764	9.77638	1.42209e-22	7.12349e-22
FIZ1	204.534	1.26611	0.223833	5.6565	1.54494e-08	3.39915e-08
FKBP11	128.493	-1.7324	0.263233	-6.58122	4.66599e-11	1.2161e-10
FKBP14	1536.82	1.58182	0.150054	10.5416	5.5518e-26	3.26791e-25
FKBP3	188.064	2.51481	0.210433	11.9507	6.4405e-33	4.99993e-32
FKBP5	512.922	3.5892	0.165291	21.7144	1.49891e-104	7.75427e-103
FKBP7	345.336	1.09752	0.191122	5.74248	9.32998e-09	2.08956e-08
FKBP8	1947.86	1.08528	0.108061	10.0433	9.83759e-24	5.21284e-23
FKBP9	6937.16	3.35735	0.132154	25.4049	2.22898e-142	2.45433e-140
FLAD1	576.179	1.06948	0.127723	8.37342	5.59711e-17	2.07977e-16
FLII	1232.89	-1.49261	0.119312	-12.5102	6.56851e-36	5.66345e-35
FLNB	10972.4	2.89015	0.154729	18.6787	7.37492e-78	2.12263e-76
FLNC	7262.71	-1.68478	0.140971	-11.9512	6.39782e-33	4.97001e-32
FLOT1	686.605	-1.651	0.143242	-11.526	9.75868e-31	6.95922e-30
FLOT2	602.132	-1.92728	0.187184	-10.2962	7.33327e-25	4.1013e-24
FLRT2	3927.43	4.73173	0.257304	18.3896	1.59047e-75	4.30899e-74
FLT3LG	9.91048	3.36184	0.814753	4.12621	3.68796e-05	6.25801e-05
FLVCR1	110.613	1.53943	0.212036	7.26022	3.86454e-13	1.15724e-12
FLVCR2	301.666	4.74459	0.239162	19.8384	1.38882e-87	5.16058e-86
FLYWCH1	689.005	-1.26958	0.134514	-9.43826	3.79015e-21	1.77139e-20
FLYWCH2	188.024	-2.46859	0.205363	-12.0206	2.76914e-33	2.17224e-32
FMN2	91.0034	-9.52077	1.2181	-7.81611	5.44806e-15	1.82291e-14
FMNL1	26.6662	-3.55082	0.639833	-5.54961	2.86312e-08	6.18599e-08
FMNL2	339.458	-3.83044	0.239993	-15.9607	2.40178e-57	4.02039e-56
FMNL3	481.457	1.33774	0.212566	6.29327	3.10838e-10	7.72396e-10
FMO4	119.68	6.31316	0.577123	10.939	7.49946e-28	4.80558e-27
FMO5	20.3431	1.3305	0.520738	2.55503	0.0106178	0.0143443
FMR1	547.752	1.21707	0.132548	9.18211	4.22724e-20	1.87423e-19
FN1	100065	1.15428	0.219945	5.24805	1.53715e-07	3.13917e-07
FN3KRP	335.062	-2.71624	0.157414	-17.2553	1.02015e-66	2.19424e-65
FNBP1	858.201	1.13507	0.151697	7.48248	7.29312e-14	2.28364e-13
FNDC3A	1082.77	-1.03587	0.132614	-7.81119	5.66522e-15	1.89345e-14
FNDC4	121.775	-5.33419	0.38689	-13.7874	3.03679e-43	3.31041e-42
FNDC5	97.3255	4.38564	0.363218	12.0744	1.44166e-33	1.14286e-32
FNIP2	829.308	1.4259	0.122007	11.687	1.48533e-31	1.091e-30
FOLH1B	90.9398	9.74649	1.21125	8.04662	8.51104e-16	2.97638e-15
FOPNL	246.617	-2.06368	0.189398	-10.896	1.20487e-27	7.66339e-27
FOS	37.5196	-1.17545	0.355061	-3.31056	0.000931106	0.00139619
FOSB	10.2411	-1.91477	0.756272	-2.53186	0.011346	0.0152714
FOSL1	697.453	-3.57543	0.571392	-6.25739	3.91463e-10	9.67333e-10
FOSL2	5410.45	2.17831	0.147081	14.8103	1.25733e-49	1.709e-48
FOXC1	127	-2.69151	0.260739	-10.3226	5.56749e-25	3.12832e-24
FOXD2	21.5976	3.94594	0.590566	6.68162	2.36315e-11	6.27763e-11
FOXF1	1258.83	-2.97036	0.178725	-16.6197	5.01674e-62	9.52704e-61
FOXF2	511.249	-4.68676	0.214383	-21.8616	6.02503e-106	3.18557e-104
FOXG1	24.9905	7.32365	1.2509	5.85469	4.77905e-09	1.09295e-08
FOXH1	30.1486	4.02907	0.615318	6.54794	5.83348e-11	1.51184e-10
FOXK1	1174.75	-2.13064	0.124304	-17.1406	7.39019e-66	1.54794e-64
FOXK2	870.413	1.04389	0.118576	8.80353	1.3258e-18	5.39397e-18
FOXL1	1767.66	-7.88292	0.278039	-28.3518	7.94655e-177	1.36249e-174
FOXM1	475.166	-2.71538	0.266555	-10.1869	2.26786e-24	1.23666e-23
FOXN2	363.303	-1.62279	0.2196	-7.38973	1.47126e-13	4.51611e-13
FOXO1	264.465	7.13727	0.396259	18.0116	1.57871e-72	3.98898e-71
FOXP2	38.9155	-7.11794	1.22987	-5.78757	7.14135e-09	1.61261e-08
FOXP3	19.9411	1.87182	0.511313	3.66081	0.000251415	0.000396411
FOXP4	277.841	2.5796	0.159658	16.1571	1.01244e-58	1.76107e-57
FOXQ1	18.9655	-4.70178	0.840978	-5.59085	2.25964e-08	4.91574e-08
FOXRED2	134.624	-1.25917	0.263356	-4.78125	1.74211e-06	3.28238e-06
FOXS1	390.678	11.9234	1.18657	10.0486	9.31346e-24	4.94603e-23
FPGS	383.694	-1.50477	0.147454	-10.205	1.88228e-24	1.03203e-23
FREM2	218.303	9.50982	1.03934	9.14984	5.70187e-20	2.51318e-19
FRK	37.25	3.5029	0.411305	8.51653	1.64403e-17	6.29843e-17
FRMD3	34.8192	5.05303	0.663939	7.61068	2.72648e-14	8.78003e-14
FRMD4A	749.95	1.63318	0.220578	7.40408	1.32059e-13	4.06822e-13
FRMD4B	623.868	9.21236	0.604238	15.2463	1.74358e-52	2.57398e-51
FRMD5	64.9023	-3.79239	0.41236	-9.19679	3.68795e-20	1.63876e-19
FRMD6	2754.2	-1.88159	0.105624	-17.8141	5.49198e-71	1.32893e-69
FRMPD1	26.3478	6.26159	1.07903	5.80299	6.51435e-09	1.47658e-08
FRMPD4	33.483	-4.56547	0.600982	-7.59667	3.03841e-14	9.75054e-14
FRRS1L	25.4745	5.72427	0.737117	7.76576	8.11555e-15	2.69739e-14
FRS3	40.4284	-1.4414	0.341904	-4.2158	2.48898e-05	4.28406e-05
FRY	348.919	-1.71488	0.236796	-7.24202	4.42057e-13	1.31946e-12
FRZB	429.875	3.94661	0.325717	12.1167	8.61645e-34	6.88513e-33
FSCN2	7.51234	-5.11248	1.34437	-3.80288	0.000143025	0.000230785
FSD1	42.0484	-4.10387	0.466055	-8.80554	1.30224e-18	5.29993e-18
FSD2	56.3967	5.35086	0.528881	10.1173	4.62937e-24	2.4871e-23
FSIP1	8.40379	-2.30723	0.784353	-2.94157	0.0032655	0.00465138
FST	803.653	-7.85059	0.920201	-8.53139	1.44594e-17	5.56043e-17
FSTL1	22698.4	1.52601	0.146064	10.4475	1.50408e-25	8.66215e-25
FTH1	3331.97	1.50454	0.110088	13.6668	1.60388e-42	1.70352e-41
FTL	17026.7	-1.25662	0.143697	-8.74489	2.23241e-18	8.98804e-18
FTSJ1	284.765	-1.23945	0.156089	-7.94066	2.01106e-15	6.88836e-15
FTSJ2	292.562	-1.50295	0.146369	-10.2682	9.79901e-25	5.42972e-24
FTSJ3	499.128	-1.32488	0.131086	-10.1069	5.14634e-24	2.75989e-23
[truncated: 4,248 more rows]
