# Supplementary material for: Multi-omic analysis of bat versus human fibroblasts reveals altered central metabolism
Source: eLife. 2024 Jul 22;13:e94007. doi: 10.7554/eLife.94007 (PMC11262796; doi:10.7554/eLife.94007)
Supplement: Supplementary file 2. — GSEA was performed on the transcriptomics data using (PI) value as a metric. The table below lists the pathways detected as upregulated in PaLung cells (compared to WI-38 cells) and associated enrichment metrics. [file elife-94007-supp2.xlsx]

## Sheet: Index
Title	Multi-omic analysis of bat versus human fibroblasts reveals altered central metabolism
Authors	N. Suhas Jagannathan, Javier Yu Peng Koh, Younghwan Lee, Radoslaw M Sobota, Aaron Irving, Lin-Fa Wang, Yoko Itahana, Koji Itahana, Lisa Tucker-Kellogg
Supplementary Table No.	Supplementary Table 2
Supplementary Table Title	Biological pathways upregulated in PaLung cells from Gene Set Enrichment Analysis of Transcriptomics data
Description	GSEA was performed on the Transcriptomics data using PI value as a metric. The table below lists the pathways detected as upregulated in PaLung cells (compared to WI-38 cells) and associated enrichment metrics
Column header	Contents
NAME	Name of Gene Set/Pathway
SIZE	Number of genes in gene set/pathway
ES	Enrichment Score from GSEA
NES	Normalized enrichment score from GSEA
NOM p-val	p value computed from GSEA
FDR q-val	FDR corrected p-values obtained from GSEA

## Sheet: Supp_Table_2_GSEA_Transcriptomi
NAME	SIZE	ES	NES	NOM p-val	FDR q-val
L13A-MEDIATED TRANSLATIONAL SILENCING OF CERULOPLASMIN EXPRESSION REACTOME DATABASE ID RELEASE 71 156827	102	-0.871266	-1.86459	0	0
CAP-DEPENDENT TRANSLATION INITIATION REACTOME DATABASE ID RELEASE 71 72737	110	-0.867767	-1.85211	0	0
TRANSLATIONAL INITIATION GOBP GO:0006413	114	-0.859871	-1.8446	0	0
REGULATION OF EXPRESSION OF SLITS AND ROBOS REACTOME DATABASE ID RELEASE 71 9010553	153	-0.837906	-1.84266	0	0
NONSENSE MEDIATED DECAY (NMD) ENHANCED BY THE EXON JUNCTION COMPLEX (EJC) REACTOME R-HSA-975957.1	107	-0.862348	-1.83796	0	0
GTP HYDROLYSIS AND JOINING OF THE 60S RIBOSOMAL SUBUNIT REACTOME R-HSA-72706.2	103	-0.869318	-1.82911	0	0
NUCLEAR-TRANSCRIBED MRNA CATABOLIC PROCESS GOBP GO:0000956	179	-0.817705	-1.82134	0	0
MRNA CATABOLIC PROCESS GOBP GO:0006402	191	-0.810779	-1.81824	0	0
EUKARYOTIC TRANSLATION INITIATION REACTOME DATABASE ID RELEASE 71 72613	110	-0.867767	-1.81618	0	0
EUKARYOTIC TRANSLATION ELONGATION REACTOME R-HSA-156842.2	85	-0.874585	-1.81611	0	0
SRP-DEPENDENT COTRANSLATIONAL PROTEIN TARGETING TO MEMBRANE REACTOME R-HSA-1799339.2	103	-0.854152	-1.81578	0	0
SELENOCYSTEINE SYNTHESIS REACTOME DATABASE ID RELEASE 71 2408557	84	-0.870397	-1.81445	0	0
NONSENSE-MEDIATED DECAY (NMD) REACTOME R-HSA-927802.2	107	-0.862348	-1.81251	0	0
TRANSLATION REACTOME DATABASE ID RELEASE 71 72766	278	-0.793823	-1.8121	0	0
RNA CATABOLIC PROCESS GOBP GO:0006401	214	-0.800795	-1.81042	0	0
PEPTIDE BIOSYNTHETIC PROCESS GOBP GO:0043043	313	-0.782044	-1.8098	0	0
FORMATION OF A POOL OF FREE 40S SUBUNITS REACTOME DATABASE ID RELEASE 71 72689	92	-0.871322	-1.8098	0	0
INFLUENZA LIFE CYCLE REACTOME DATABASE ID RELEASE 71 168255	129	-0.841522	-1.80935	0	0
RESPONSE OF EIF2AK4 (GCN2) TO AMINO ACID DEFICIENCY REACTOME DATABASE ID RELEASE 71 9633012	92	-0.859287	-1.80856	0	0
VIRAL MRNA TRANSLATION REACTOME DATABASE ID RELEASE 71 192823	81	-0.873382	-1.80841	0	0
PEPTIDE CHAIN ELONGATION REACTOME R-HSA-156902.2	81	-0.876186	-1.80743	0	0
NONSENSE MEDIATED DECAY (NMD) INDEPENDENT OF THE EXON JUNCTION COMPLEX (EJC) REACTOME R-HSA-975956.1	87	-0.870996	-1.80499	0	0
INFLUENZA VIRAL RNA TRANSCRIPTION AND REPLICATION REACTOME DATABASE ID RELEASE 71 168273	121	-0.845546	-1.80381	0	0
PROTEIN LOCALIZATION TO ENDOPLASMIC RETICULUM GOBP GO:0070972	119	-0.832892	-1.80193	0	0
NUCLEAR-TRANSCRIBED MRNA CATABOLIC PROCESS, NONSENSE-MEDIATED DECAY GOBP GO:0000184	107	-0.853689	-1.79958	0	0
SIGNALING BY ROBO RECEPTORS REACTOME R-HSA-376176.4	193	-0.806547	-1.79657	0	0
INFLUENZA INFECTION REACTOME R-HSA-168254.2	139	-0.825152	-1.79422	0	0
TRANSLATION GOBP GO:0006412	296	-0.778634	-1.79232	0	0
EUKARYOTIC TRANSLATION TERMINATION REACTOME R-HSA-72764.4	85	-0.871315	-1.79057	0	0
SELENOAMINO ACID METABOLISM REACTOME DATABASE ID RELEASE 71 2408522	105	-0.835777	-1.7747	0	0
MAJOR PATHWAY OF RRNA PROCESSING IN THE NUCLEOLUS AND CYTOSOL REACTOME R-HSA-6791226.3	170	-0.802802	-1.77321	0	0
ESTABLISHMENT OF PROTEIN LOCALIZATION TO ENDOPLASMIC RETICULUM GOBP GO:0072599	100	-0.843142	-1.76931	0	0
COTRANSLATIONAL PROTEIN TARGETING TO MEMBRANE GOBP GO:0006613	90	-0.853223	-1.7682	0	0
RRNA PROCESSING IN THE NUCLEUS AND CYTOSOL REACTOME R-HSA-8868773.3	180	-0.795889	-1.76363	0	2.64e-05
PROTEIN TARGETING TO MEMBRANE GOBP GO:0006612	134	-0.814792	-1.76038	0	2.57e-05
CYTOPLASMIC RIBOSOMAL PROTEINS WIKIPATHWAYS_20191210 WP477 HOMO SAPIENS	82	-0.865111	-1.75783	0	4.97e-05
PROTEIN TARGETING TO ER GOBP GO:0045047	97	-0.843233	-1.75446	0	7.25e-05
VIRAL GENE EXPRESSION GOBP GO:0019080	122	-0.820158	-1.75351	0	7.06e-05
SRP-DEPENDENT COTRANSLATIONAL PROTEIN TARGETING TO MEMBRANE GOBP GO:0006614	85	-0.856216	-1.75031	0	6.88e-05
VIRAL TRANSCRIPTION GOBP GO:0019083	105	-0.831884	-1.74701	0	6.71e-05
ACTIVATION OF THE MRNA UPON BINDING OF THE CAP-BINDING COMPLEX AND EIFS, AND SUBSEQUENT BINDING TO 43S REACTOME R-HSA-72662.3	56	-0.883063	-1.74344	0	8.72e-05
AMIDE BIOSYNTHETIC PROCESS GOBP GO:0043604	383	-0.744884	-1.74084	0	8.51e-05
NUCLEOBASE-CONTAINING COMPOUND CATABOLIC PROCESS GOBP GO:0034655	322	-0.747308	-1.73596	0	0.000104
CYTOPLASMIC TRANSLATION GOBP GO:0002181	54	-0.874015	-1.73436	0	0.000102
RRNA PROCESSING REACTOME DATABASE ID RELEASE 71 72312	189	-0.784321	-1.73364	0	9.96e-05
TRANSLATION INITIATION COMPLEX FORMATION REACTOME DATABASE ID RELEASE 71 72649	55	-0.883111	-1.73183	0	9.75e-05
RIBOSOMAL SCANNING AND START CODON RECOGNITION REACTOME R-HSA-72702.3	55	-0.880304	-1.71426	0	0.000211
PROTEIN TARGETING GOBP GO:0006605	283	-0.739949	-1.70904	0	0.000262
FORMATION OF THE TERNARY COMPLEX, AND SUBSEQUENTLY, THE 43S COMPLEX REACTOME DATABASE ID RELEASE 71 72695	48	-0.878466	-1.70325	0	0.000403
CELLULAR NITROGEN COMPOUND CATABOLIC PROCESS GOBP GO:0044270	345	-0.721186	-1.69784	0	0.000466
ESTABLISHMENT OF PROTEIN LOCALIZATION TO ORGANELLE GOBP GO:0072594	325	-0.726453	-1.69391	0	0.000633
AROMATIC COMPOUND CATABOLIC PROCESS GOBP GO:0019439	347	-0.728804	-1.6925	0	0.00069
PEPTIDE METABOLIC PROCESS GOBP GO:0006518	392	-0.722765	-1.69196	0	0.000694
CELLULAR RESPONSES TO STRESS REACTOME DATABASE ID RELEASE 71 2262752	456	-0.710844	-1.67591	0	0.00156101
HETEROCYCLE CATABOLIC PROCESS GOBP GO:0046700	343	-0.719545	-1.66849	0	0.00217022
ESTABLISHMENT OF PROTEIN LOCALIZATION TO MEMBRANE GOBP GO:0090150	215	-0.736663	-1.66714	0	0.00225999
CELLULAR RESPONSES TO EXTERNAL STIMULI REACTOME DATABASE ID RELEASE 71 8953897	459	-0.710619	-1.66708	0	0.00223577
ORGANIC CYCLIC COMPOUND CATABOLIC PROCESS GOBP GO:1901361	365	-0.711585	-1.64869	0	0.0047631
CALNEXIN CALRETICULIN CYCLE REACTOME R-HSA-901042.2	23	-0.933115	-1.60474	0	0.0229717
N-GLYCAN TRIMMING IN THE ER AND CALNEXIN CALRETICULIN CYCLE REACTOME DATABASE ID RELEASE 71 532668	32	-0.884078	-1.59981	0	0.0263414
RIBOSOMAL LARGE SUBUNIT BIOGENESIS GOBP GO:0042273	64	-0.796412	-1.58547	0.0013986	0.0411806
OXYGEN-DEPENDENT PROLINE HYDROXYLATION OF HYPOXIA-INDUCIBLE FACTOR ALPHA REACTOME DATABASE ID RELEASE 71 1234176	61	-0.787532	-1.58214	0.00407609	0.0450843
ER QUALITY CONTROL COMPARTMENT (ERQC) REACTOME DATABASE ID RELEASE 71 901032	18	-0.946152	-1.57559	0	0.0542161
RIBOSOME ASSEMBLY GOBP GO:0042255	49	-0.81844	-1.56563	0.00145985	0.0713381
AMINO ACID AND DERIVATIVE METABOLISM REACTOME R-HSA-71291.6	282	-0.681461	-1.56487	0	0.0717591
CITRIC ACID CYCLE (TCA CYCLE) REACTOME DATABASE ID RELEASE 71 71403	22	-0.911121	-1.56128	0.00320513	0.0782425
TRANSLATION FACTORS WIKIPATHWAYS_20191210 WP107 HOMO SAPIENS	48	-0.806283	-1.55985	0	0.0797941
REGULATION OF TP53 DEGRADATION REACTOME R-HSA-6804757.1	31	-0.870629	-1.55649	0	0.0863927
VIRAL PROCESS GOBP GO:0016032	259	-0.678573	-1.5553	0	0.0877701
SIGNALING BY FGFR4 REACTOME R-HSA-5654743.2	27	-0.876006	-1.55424	0.0030349	0.0888233
REGULATION OF CALCIUM-MEDIATED SIGNALING GOBP GO:0050848	47	-0.811197	-1.55084	0.00692521	0.0956085
NEGATIVE REGULATION OF G0 TO G1 TRANSITION GOBP GO:0070317	36	-0.833374	-1.54615	0.0045045	0.106841
CYCLIN D ASSOCIATED EVENTS IN G1 REACTOME R-HSA-69231.7	40	-0.827119	-1.54534	0.00601504	0.107785
G1 PHASE REACTOME DATABASE ID RELEASE 71 69236	40	-0.827119	-1.54481	0.00728863	0.107951
INSULIN PROCESSING REACTOME R-HSA-264876.2	20	-0.908245	-1.54226	0.00476191	0.114012
ERROR-PRONE TRANSLESION SYNTHESIS GOBP GO:0042276	19	-0.902652	-1.53741	0.00300752	0.126991
TRANSLESION SYNTHESIS BY POLH REACTOME R-HSA-110320.1	18	-0.907973	-1.53506	0.00476191	0.132554
SMOOTH MUSCLE CONTRACTION REACTOME R-HSA-445355.3	29	-0.865588	-1.53357	0.00321543	0.136112
CELLULAR RESPONSE TO HYPOXIA REACTOME R-HSA-1234174.2	69	-0.767056	-1.53084	0.001443	0.143644
INTERSPECIES INTERACTION BETWEEN ORGANISMS GOBP GO:0044419	322	-0.66119	-1.53011	0	0.144136
DUAL INCISION IN TC-NER REACTOME R-HSA-6782135.1	62	-0.762026	-1.53011	0.00712251	0.142368
TCA CYCLE (AKA KREBS OR CITRIC ACID CYCLE) WIKIPATHWAYS_20191210 WP78 HOMO SAPIENS	18	-0.912249	-1.52732	0.00679117	0.149964
SYMBIONT PROCESS GOBP GO:0044403	316	-0.660391	-1.52634	0	0.151093
REGULATION OF TP53 EXPRESSION AND DEGRADATION REACTOME R-HSA-6806003.1	32	-0.845231	-1.5262	0.00605144	0.149924
ERROR-FREE TRANSLESION SYNTHESIS GOBP GO:0070987	19	-0.905162	-1.52572	0.0015873	0.149766
TRANSCRIPTIONAL REGULATION BY E2F6 REACTOME DATABASE ID RELEASE 71 8953750	34	-0.835554	-1.52515	0.00458716	0.150193
MITOPHAGY REACTOME DATABASE ID RELEASE 71 5205647	25	-0.870128	-1.52402	0.00621118	0.152274
GAP-FILLING DNA REPAIR SYNTHESIS AND LIGATION IN TC-NER REACTOME DATABASE ID RELEASE 71 6782210	62	-0.767423	-1.52125	0.00561798	0.161169
ER-PHAGOSOME PATHWAY REACTOME DATABASE ID RELEASE 71 1236974	69	-0.758449	-1.52107	0.00272109	0.159943
SYNTHESIS OF ACTIVE UBIQUITIN: ROLES OF E1 AND E2 ENZYMES REACTOME R-HSA-8866652.2	29	-0.853195	-1.52027	0.00319489	0.160681
FCERI MEDIATED NF-KB ACTIVATION REACTOME R-HSA-2871837.2	71	-0.750048	-1.51881	0.0014245	0.164231
SIGNALING BY FGFR1 REACTOME DATABASE ID RELEASE 71 5654736	32	-0.836733	-1.51836	0.00628931	0.164082
CENTRAL NERVOUS SYSTEM NEURON DEVELOPMENT GOBP GO:0021954	29	-0.83975	-1.51808	0.00453172	0.163292
REGULATION OF TP53 ACTIVITY THROUGH METHYLATION REACTOME DATABASE ID RELEASE 71 6804760	17	-0.903969	-1.51684	0	0.166234
AUF1 (HNRNP D0) BINDS AND DESTABILIZES MRNA REACTOME DATABASE ID RELEASE 71 450408	50	-0.76544	-1.51593	0.0100287	0.167798
B CELL ACTIVATION REACTOME DATABASE ID RELEASE 71 983705	92	-0.724662	-1.5138	0.00413223	0.173984
CYTOPLASMIC PATTERN RECOGNITION RECEPTOR SIGNALING PATHWAY GOBP GO:0002753	32	-0.830314	-1.51365	0.00777605	0.172791
IKK COMPLEX RECRUITMENT MEDIATED BY RIP1 REACTOME DATABASE ID RELEASE 71 937041	18	-0.898547	-1.51332	0.00501672	0.172421
VIRION ASSEMBLY GOBP GO:0019068	35	-0.82583	-1.51249	0.00597015	0.173743
ENDOSOMAL SORTING COMPLEX REQUIRED FOR TRANSPORT (ESCRT) REACTOME R-HSA-917729.1	27	-0.83761	-1.5117	0.0108696	0.174884
INFECTIOUS DISEASE REACTOME DATABASE ID RELEASE 71 5663205	379	-0.643861	-1.51083	0	0.176457
CHONDROITIN SULFATE METABOLIC PROCESS GOBP GO:0030204	26	-0.858577	-1.50909	0.0136364	0.181727
PROTEIN LOCALIZATION TO MEMBRANE GOBP GO:0072657	357	-0.651744	-1.5088	0	0.18113
I-KAPPAB KINASE/NF-KAPPAB SIGNALING GOBP GO:0007249	51	-0.765914	-1.50817	0.00716332	0.181787
TICAM1, RIP1-MEDIATED IKK COMPLEX RECRUITMENT REACTOME R-HSA-168927.3	17	-0.90668	-1.50722	0.00474683	0.183755
RIBOSOME BIOGENESIS GOBP GO:0042254	227	-0.667536	-1.50672	0	0.183798
VESICLE-MEDIATED TRANSPORT BETWEEN ENDOSOMAL COMPARTMENTS GOBP GO:0098927	21	-0.877116	-1.50447	0.00324675	0.190799
DEGRADATION OF GLI2 BY THE PROTEASOME REACTOME R-HSA-5610783.1	56	-0.763792	-1.50387	0.0111266	0.191333
CITRATE METABOLIC PROCESS GOBP GO:0006101	29	-0.82777	-1.50382	0.0152905	0.189784
ATP METABOLIC PROCESS GOBP GO:0046034	136	-0.689431	-1.50016	0.00380228	0.202786
PRADER-WILLI AND ANGELMAN SYNDROME WIKIPATHWAYS_20191210 WP3998 HOMO SAPIENS	31	-0.846857	-1.49851	0.00301659	0.20778
MYD88-INDEPENDENT TOLL-LIKE RECEPTOR SIGNALING PATHWAY GOBP GO:0002756	27	-0.836435	-1.49841	0.0189873	0.206341
ANTIGEN PROCESSING AND PRESENTATION OF PEPTIDE ANTIGEN VIA MHC CLASS I GOBP GO:0002474	80	-0.730335	-1.49762	0.00412088	0.207835
STABILIZATION OF P53 REACTOME R-HSA-69541.5	53	-0.765844	-1.49515	0.017673	0.216427
DOWNSTREAM TCR SIGNALING REACTOME R-HSA-202424.3	76	-0.734656	-1.49442	0.00707214	0.217854
THE ROLE OF GTSE1 IN G2 M PROGRESSION AFTER G2 CHECKPOINT REACTOME DATABASE ID RELEASE 71 8852276	57	-0.744197	-1.49062	0.0186514	0.233181
ABC TRANSPORTER DISORDERS REACTOME DATABASE ID RELEASE 71 5619084	64	-0.743553	-1.49037	0.0089955	0.232277
GAP-FILLING DNA REPAIR SYNTHESIS AND LIGATION IN GG-NER REACTOME R-HSA-5696397.1	24	-0.855414	-1.48948	0.0158228	0.234394
TNFR2 NON-CANONICAL NF-KB PATHWAY REACTOME R-HSA-5668541.2	80	-0.717725	-1.48934	0.00537634	0.233057
CLEC7A (DECTIN-1) SIGNALING REACTOME R-HSA-5607764.1	89	-0.709126	-1.4891	0.0106383	0.232317
REGULATION OF G0 TO G1 TRANSITION GOBP GO:0070316	38	-0.799547	-1.48792	0.0131387	0.235624
NEGATIVE REGULATION OF FGFR4 SIGNALING REACTOME DATABASE ID RELEASE 71 5654733	19	-0.885121	-1.48738	0.00782473	0.236268
VIF-MEDIATED DEGRADATION OF APOBEC3G REACTOME DATABASE ID RELEASE 71 180585	50	-0.760213	-1.48711	0.0128023	0.235552
G1 S DNA DAMAGE CHECKPOINTS REACTOME R-HSA-69615.2	63	-0.74392	-1.48708	0.0172414	0.233782
GLI3 IS PROCESSED TO GLI3R BY THE PROTEASOME REACTOME R-HSA-5610785.1	56	-0.763717	-1.48693	0.00703235	0.232652
RESPIRATORY ELECTRON TRANSPORT, ATP SYNTHESIS BY CHEMIOSMOTIC COUPLING, AND HEAT PRODUCTION BY UNCOUPLING PROTEINS. REACTOME R-HSA-163200.1	107	-0.696504	-1.48672	0.00258732	0.231731
REGULATION OF TP53 ACTIVITY THROUGH PHOSPHORYLATION REACTOME DATABASE ID RELEASE 71 6804756	85	-0.719385	-1.48642	0.00405954	0.231313
BUDDING AND MATURATION OF HIV VIRION REACTOME DATABASE ID RELEASE 71 162588	24	-0.852805	-1.48594	0.0122888	0.231623
SIGNALING BY FGFR REACTOME R-HSA-190236.2	61	-0.739594	-1.48574	0.00867052	0.230753
PHOSPHODIESTERASES IN NEURONAL FUNCTION WIKIPATHWAYS_20191210 WP4222 HOMO SAPIENS	29	-0.817014	-1.48396	0.00761035	0.237066
P53-DEPENDENT G1 DNA DAMAGE RESPONSE REACTOME DATABASE ID RELEASE 71 69563	61	-0.746766	-1.48333	0.00869565	0.237846
PINK PARKIN MEDIATED MITOPHAGY REACTOME R-HSA-5205685.2	20	-0.874772	-1.48228	0.0164745	0.24089
MFAP5 EFFECT ON PERMEABILITY AND MOTILITY OF ENDOTHELIAL CELLS VIA CYTOSKELETON REARRANGEMENT WIKIPATHWAYS_20191210 WP4560 HOMO SAPIENS	16	-0.901603	-1.48205	0.0161031	0.240132
FC EPSILON RECEPTOR (FCERI) SIGNALING REACTOME DATABASE ID RELEASE 71 2454202	108	-0.704381	-1.48203	0	0.238453
OXIDATIVE STRESS INDUCED SENESCENCE REACTOME R-HSA-2559580.4	65	-0.743157	-1.48099	0.00826446	0.241159
P53-DEPENDENT G1 S DNA DAMAGE CHECKPOINT REACTOME DATABASE ID RELEASE 71 69580	61	-0.746766	-1.47827	0.00707214	0.252288
TRIF-DEPENDENT TOLL-LIKE RECEPTOR SIGNALING PATHWAY GOBP GO:0035666	24	-0.853377	-1.47741	0.00766871	0.25444
ANTIGEN PRESENTATION: FOLDING, ASSEMBLY AND PEPTIDE LOADING OF CLASS I MHC REACTOME DATABASE ID RELEASE 71 983170	18	-0.886086	-1.47725	0.015456	0.253292
TRICARBOXYLIC ACID CYCLE GOBP GO:0006099	28	-0.827776	-1.47712	0.015625	0.25198
PROTEIN TRANSMEMBRANE IMPORT INTO INTRACELLULAR ORGANELLE GOBP GO:0044743	36	-0.794241	-1.47694	0.0154799	0.251058
P53-INDEPENDENT DNA DAMAGE RESPONSE REACTOME DATABASE ID RELEASE 71 69610	49	-0.759966	-1.47693	0.0148368	0.249315
TRANSLESION SYNTHESIS BY POLI REACTOME R-HSA-5656121.1	16	-0.903701	-1.47653	0.00646204	0.249348
ONCOGENE INDUCED SENESCENCE REACTOME R-HSA-2559585.6	29	-0.809779	-1.4762	0.0154799	0.24918
NUCLEOTIDE-BINDING DOMAIN, LEUCINE RICH REPEAT CONTAINING RECEPTOR SIGNALING PATHWAY GOBP GO:0035872	25	-0.841034	-1.47584	0.0172414	0.249314
TNF SIGNALING REACTOME DATABASE ID RELEASE 71 75893	36	-0.792882	-1.47549	0.0103397	0.249328
OXIDATIVE PHOSPHORYLATION GOBP GO:0006119	88	-0.709613	-1.47381	0.0121457	0.255598
SCF-BETA-TRCP MEDIATED DEGRADATION OF EMI1 REACTOME DATABASE ID RELEASE 71 174113	52	-0.747637	-1.47333	0.0102639	0.256294
SIGNALING BY TGF-BETA RECEPTOR COMPLEX REACTOME R-HSA-170834.1	69	-0.735351	-1.47321	0.0138504	0.25526
TRANSLESION SYNTHESIS BY POLK REACTOME R-HSA-5655862.1	16	-0.906699	-1.47233	0.0100167	0.257677
TRANSLESION SYNTHESIS BY REV1 REACTOME DATABASE ID RELEASE 71 110312	15	-0.906724	-1.47226	0.0111111	0.256192
DECTIN-1 MEDIATED NONCANONICAL NF-KB SIGNALING REACTOME DATABASE ID RELEASE 71 5607761	57	-0.751078	-1.47159	0.0056899	0.257734
P53-INDEPENDENT G1 S DNA DAMAGE CHECKPOINT REACTOME R-HSA-69613.2	49	-0.759966	-1.47121	0.0142653	0.257905
AUTODEGRADATION OF THE E3 UBIQUITIN LIGASE COP1 REACTOME R-HSA-349425.2	49	-0.759596	-1.47047	0.00853485	0.259666
NUCLEOTIDE-EXCISION REPAIR, DNA GAP FILLING GOBP GO:0006297	23	-0.852914	-1.47032	0.00917431	0.258731
HH MUTANTS ABROGATE LIGAND SECRETION REACTOME R-HSA-5387390.3	53	-0.753614	-1.46935	0.00878477	0.261414
NICOTINIC ACETYLCHOLINE RECEPTOR SIGNALING PATHWAY PANTHER PATHWAY P00044	52	-0.75965	-1.46821	0.0101597	0.26495
REGULATION OF RAS BY GAPS REACTOME R-HSA-5658442.1	61	-0.730246	-1.46722	0.0101597	0.267861
DOWNSTREAM SIGNALING EVENTS OF B CELL RECEPTOR (BCR) REACTOME DATABASE ID RELEASE 71 1168372	74	-0.725651	-1.46706	0.00688705	0.266972
TRANSCRIPTIONAL ACTIVITY OF SMAD2 SMAD3:SMAD4 HETEROTRIMER REACTOME R-HSA-2173793.2	42	-0.784701	-1.46649	0.0148588	0.268082
SIGNALING BY FGFR3 REACTOME R-HSA-5654741.2	26	-0.841348	-1.46646	0.0172144	0.266563
SYNTHESIS OF GLYCOSYLPHOSPHATIDYLINOSITOL (GPI) REACTOME DATABASE ID RELEASE 71 162710	16	-0.892522	-1.4663	0.00815661	0.265655
REGULATION OF DNA-TEMPLATED TRANSCRIPTION IN RESPONSE TO STRESS GOBP GO:0043620	103	-0.697827	-1.46617	0.005291	0.264636
TCR SIGNALING REACTOME R-HSA-202403.4	88	-0.702369	-1.46602	0.00923483	0.263662
REGULATION OF TRANSCRIPTION FROM RNA POLYMERASE II PROMOTER IN RESPONSE TO HYPOXIA GOBP GO:0061418	69	-0.734065	-1.46578	0.014885	0.263122
DEGRADATION OF AXIN REACTOME R-HSA-4641257.2	52	-0.752973	-1.46572	0.010043	0.261772
FBXL7 DOWN-REGULATES AURKA DURING MITOTIC ENTRY AND IN EARLY MITOSIS REACTOME DATABASE ID RELEASE 71 8854050	52	-0.760043	-1.46482	0.0131387	0.264232
NIK-->NONCANONICAL NF-KB SIGNALING REACTOME DATABASE ID RELEASE 71 5676590	56	-0.751181	-1.46473	0.0101892	0.263106
MORPHOGENESIS OF A POLARIZED EPITHELIUM GOBP GO:0001738	23	-0.8419	-1.4644	0.025641	0.263083
REGULATION OF PTEN STABILITY AND ACTIVITY REACTOME R-HSA-8948751.1	65	-0.727329	-1.46334	0.0186514	0.266289
NUCLEOTIDE-BINDING OLIGOMERIZATION DOMAIN CONTAINING SIGNALING PATHWAY GOBP GO:0070423	24	-0.841056	-1.46308	0.0243112	0.265842
CELLULAR RESPONSE TO INTERLEUKIN-1 GOBP GO:0071347	113	-0.689612	-1.46256	0.0026738	0.266767
CDT1 ASSOCIATION WITH THE CDC6:ORC:ORIGIN COMPLEX REACTOME DATABASE ID RELEASE 71 68827	56	-0.748212	-1.46249	0.0146413	0.265551
POSITIVE REGULATION OF NF-KAPPAB TRANSCRIPTION FACTOR ACTIVITY GOBP GO:0051092	110	-0.683671	-1.46175	0.00938338	0.267324
CELL DEATH IN RESPONSE TO OXIDATIVE STRESS GOBP GO:0036473	15	-0.871147	-1.46116	0.0192308	0.268442
VPU MEDIATED DEGRADATION OF CD4 REACTOME R-HSA-180534.1	48	-0.759112	-1.46056	0.0145138	0.269665
REGULATION OF APOPTOSIS REACTOME R-HSA-169911.2	50	-0.750439	-1.46052	0.0232221	0.268311
SMAD2 SMAD3:SMAD4 HETEROTRIMER REGULATES TRANSCRIPTION REACTOME DATABASE ID RELEASE 71 2173796	30	-0.787067	-1.46009	0.028169	0.268888
DEADENYLATION OF MRNA REACTOME R-HSA-429947.2	25	-0.831001	-1.46005	0.0178838	0.267544
NEGATIVE REGULATION OF NOTCH4 SIGNALING REACTOME DATABASE ID RELEASE 71 9604323	52	-0.757925	-1.45876	0.017094	0.272151
RESPONSE TO INTERLEUKIN-1 GOBP GO:0070555	125	-0.684169	-1.45792	0.0154242	0.274614
RESPIRATORY ELECTRON TRANSPORT REACTOME R-HSA-611105.3	89	-0.702601	-1.45741	0.0105263	0.275376
RIBOSOMAL SMALL SUBUNIT ASSEMBLY GOBP GO:0000028	15	-0.871572	-1.45612	0.0229885	0.279778
ANTIGEN PROCESSING AND PRESENTATION OF EXOGENOUS PEPTIDE ANTIGEN VIA MHC CLASS I GOBP GO:0042590	63	-0.730995	-1.45588	0.01983	0.279417
UBIQUITIN MEDIATED DEGRADATION OF PHOSPHORYLATED CDC25A REACTOME DATABASE ID RELEASE 71 69601	49	-0.759966	-1.45496	0.0116448	0.282222
DEGRADATION OF GLI1 BY THE PROTEASOME REACTOME R-HSA-5610780.1	56	-0.734093	-1.45495	0.0188406	0.280711
HALLMARK_MYC_TARGETS_V1 MSIGDB_C2 HALLMARK_MYC_TARGETS_V1	197	-0.651263	-1.45418	0.00122249	0.282741
CELLULAR RESPIRATION GOBP GO:0045333	117	-0.682186	-1.45391	0.00774194	0.282453
TRANSCRIPTION-COUPLED NUCLEOTIDE EXCISION REPAIR (TC-NER) REACTOME R-HSA-6781827.1	75	-0.711472	-1.45323	0.0123288	0.284086
MITOCHONDRIAL RESPIRATORY CHAIN COMPLEX ASSEMBLY GOBP GO:0033108	87	-0.70522	-1.45101	0.0161725	0.29318
REGULATION OF TNFR1 SIGNALING REACTOME DATABASE ID RELEASE 71 5357905	27	-0.828789	-1.451	0.0168712	0.291661
RNA POLYMERASE I TRANSCRIPTION TERMINATION REACTOME DATABASE ID RELEASE 71 73863	30	-0.79563	-1.45092	0.0231481	0.290462
ORC1 REMOVAL FROM CHROMATIN REACTOME R-HSA-68949.3	67	-0.723032	-1.4504	0.0158273	0.29123
DEFECTIVE CFTR CAUSES CYSTIC FIBROSIS REACTOME R-HSA-5678895.2	57	-0.739211	-1.44956	0.0193165	0.293797
AUTOPHAGY REACTOME R-HSA-9612973.1	113	-0.675513	-1.44945	0.00532623	0.292773
REGULATION OF RUNX3 EXPRESSION AND ACTIVITY REACTOME DATABASE ID RELEASE 71 8941858	52	-0.750479	-1.44906	0.0196078	0.29306
TRANSCRIPTION-COUPLED NUCLEOTIDE-EXCISION REPAIR GOBP GO:0006283	70	-0.714403	-1.44902	0.0141243	0.291684
TRANSLATION INHIBITORS IN CHRONICALLY ACTIVATED PDGFRA CELLS WIKIPATHWAYS_20191210 WP4566 HOMO SAPIENS	45	-0.770068	-1.44735	0.0184136	0.298123
DNA REPLICATION PRE-INITIATION REACTOME R-HSA-69002.2	81	-0.703148	-1.44711	0.00945946	0.297746
ANTIGEN PROCESSING AND PRESENTATION OF EXOGENOUS PEPTIDE ANTIGEN VIA MHC CLASS I, TAP-DEPENDENT GOBP GO:0002479	61	-0.724821	-1.44655	0.0240113	0.298897
RESPONSE TO ORGANOPHOSPHORUS GOBP GO:0046683	43	-0.755975	-1.44654	0.0266667	0.297461
UBIQUITIN-DEPENDENT DEGRADATION OF CYCLIN D REACTOME DATABASE ID RELEASE 71 75815	49	-0.757621	-1.44637	0.0280112	0.296772
MITOTIC G1 PHASE AND G1 S TRANSITION REACTOME DATABASE ID RELEASE 71 453279	143	-0.66954	-1.44602	0.00633714	0.296889
HH MUTANTS THAT DON'T UNDERGO AUTOCATALYTIC PROCESSING ARE DEGRADED BY ERAD REACTOME R-HSA-5362768.1	52	-0.756252	-1.4455	0.0262391	0.29782
SCF(SKP2)-MEDIATED DEGRADATION OF P27 P21 REACTOME R-HSA-187577.3	57	-0.734934	-1.44446	0.0169972	0.301348
SELENIUM METABOLISM AND SELENOPROTEINS WIKIPATHWAYS_20191210 WP28 HOMO SAPIENS	37	-0.781809	-1.44191	0.0213415	0.312168
TRANSCRIPTION ELONGATION FROM RNA POLYMERASE I PROMOTER GOBP GO:0006362	28	-0.796068	-1.44163	0.0327103	0.312113
DEGRADATION OF DVL REACTOME R-HSA-4641258.2	54	-0.746221	-1.44061	0.0160116	0.31554
CYTOCHROME COMPLEX ASSEMBLY GOBP GO:0017004	32	-0.801315	-1.44004	0.0311042	0.316861
REGULATION OF ACTIVATED PAK-2P34 BY PROTEASOME MEDIATED DEGRADATION REACTOME DATABASE ID RELEASE 71 211733	47	-0.75641	-1.43985	0.0114449	0.316087
ASSEMBLY OF THE PRE-REPLICATIVE COMPLEX REACTOME R-HSA-68867.4	65	-0.725136	-1.43899	0.0165975	0.318736
REGULATION OF TRANSCRIPTION FROM RNA POLYMERASE II PROMOTER IN RESPONSE TO STRESS GOBP GO:0043618	97	-0.679404	-1.43886	0.0141388	0.317791
CYCLIN E ASSOCIATED EVENTS DURING G1 S TRANSITION REACTOME R-HSA-69202.3	80	-0.701537	-1.43844	0.0277778	0.318504
ACTIVATION OF NF-KAPPAB IN B CELLS REACTOME DATABASE ID RELEASE 71 1169091	62	-0.722957	-1.43492	0.0197183	0.334607
PLATELET HOMEOSTASIS REACTOME R-HSA-418346.2	60	-0.723435	-1.43435	0.0165517	0.335867
C-TYPE LECTIN RECEPTORS (CLRS) REACTOME DATABASE ID RELEASE 71 5621481	105	-0.684792	-1.43374	0.0131062	0.337426
RESPONSE OF MTB TO PHAGOCYTOSIS REACTOME DATABASE ID RELEASE 71 9637690	20	-0.834388	-1.43367	0.0325203	0.336238
NEGATIVE REGULATION OF RNA SPLICING GOBP GO:0033119	18	-0.863362	-1.43329	0.0238095	0.336544
RIBONUCLEOPROTEIN COMPLEX ASSEMBLY GOBP GO:0022618	177	-0.650332	-1.43232	0.00733496	0.339925
RIBONUCLEOPROTEIN COMPLEX BIOGENESIS GOBP GO:0022613	349	-0.617685	-1.4319	0.0021978	0.340572
RESPONSE TO PURINE-CONTAINING COMPOUND GOBP GO:0014074	42	-0.754039	-1.43165	0.023088	0.340154
TERMINATION OF RNA POLYMERASE I TRANSCRIPTION GOBP GO:0006363	30	-0.79563	-1.43087	0.0342262	0.342564
GPI ANCHOR METABOLIC PROCESS GOBP GO:0006505	30	-0.789609	-1.4303	0.0276074	0.343809
RESPIRATORY CHAIN COMPLEX IV ASSEMBLY GOBP GO:0008535	22	-0.823402	-1.4293	0.0251177	0.347227
TRIF(TICAM1)-MEDIATED TLR4 SIGNALING REACTOME DATABASE ID RELEASE 71 937061	91	-0.682175	-1.42923	0.0107095	0.346041
HEDGEHOG 'ON' STATE REACTOME R-HSA-5632684.1	78	-0.703682	-1.42916	0.0228495	0.344894
HEDGEHOG LIGAND BIOGENESIS REACTOME R-HSA-5358346.1	57	-0.727212	-1.42896	0.0211864	0.34444
PREASSEMBLY OF GPI ANCHOR IN ER MEMBRANE GOBP GO:0016254	16	-0.868851	-1.42846	0.0168919	0.345222
REGULATION OF RUNX2 EXPRESSION AND ACTIVITY REACTOME DATABASE ID RELEASE 71 8939902	64	-0.711596	-1.42811	0.0288858	0.34536
RESPIRATORY ELECTRON TRANSPORT CHAIN GOBP GO:0022904	79	-0.698502	-1.42784	0.0202605	0.345325
RIBOSOMAL LARGE SUBUNIT ASSEMBLY GOBP GO:0000027	22	-0.833906	-1.42781	0.0202177	0.343983
RIBOSOMAL SMALL SUBUNIT BIOGENESIS GOBP GO:0042274	57	-0.71725	-1.4262	0.0265734	0.35071
MRNA CIS SPLICING, VIA SPLICEOSOME GOBP GO:0045292	26	-0.807504	-1.42504	0.0390016	0.354881
RIBONUCLEOPROTEIN COMPLEX SUBUNIT ORGANIZATION GOBP GO:0071826	190	-0.639095	-1.42487	0.001221	0.354224
CHONDROITIN SULFATE PROTEOGLYCAN METABOLIC PROCESS GOBP GO:0050654	30	-0.804668	-1.42405	0.0370943	0.357091
NEGATIVE REGULATION OF FGFR3 SIGNALING REACTOME DATABASE ID RELEASE 71 5654732	17	-0.863551	-1.42399	0.0257649	0.355908
CHONDROITIN SULFATE BIOSYNTHETIC PROCESS GOBP GO:0030206	17	-0.858458	-1.42346	0.0228758	0.35706
AUTODEGRADATION OF CDH1 BY CDH1:APC C REACTOME DATABASE ID RELEASE 71 174084	62	-0.715467	-1.42323	0.0274725	0.356677
CDC20:PHOSPHO-APC C MEDIATED DEGRADATION OF CYCLIN A REACTOME R-HSA-174184.2	68	-0.705279	-1.423	0.0315934	0.356343
FORMATION OF TC-NER PRE-INCISION COMPLEX REACTOME DATABASE ID RELEASE 71 6781823	51	-0.731317	-1.42272	0.0404463	0.356189
MUSCLE TISSUE MORPHOGENESIS GOBP GO:0060415	28	-0.791093	-1.42268	0.0368664	0.354944
RECOGNITION OF DNA DAMAGE BY PCNA-CONTAINING REPLICATION COMPLEX REACTOME R-HSA-110314.1	29	-0.787469	-1.42238	0.0323077	0.355005
SWITCHING OF ORIGINS TO A POST-REPLICATIVE STATE REACTOME DATABASE ID RELEASE 71 69052	86	-0.682334	-1.42223	0.0194553	0.354342
REGULATION OF MRNA STABILITY BY PROTEINS THAT BIND AU-RICH ELEMENTS REACTOME R-HSA-450531.4	80	-0.693279	-1.42208	0.0286104	0.353704
ELECTRON TRANSPORT CHAIN (OXPHOS SYSTEM IN MITOCHONDRIA) WIKIPATHWAYS_20191210 WP111 HOMO SAPIENS	84	-0.690536	-1.42159	0.0203528	0.354757
MITOCHONDRIAL ATP SYNTHESIS COUPLED ELECTRON TRANSPORT GOBP GO:0042775	67	-0.708423	-1.4211	0.0336606	0.355821
APC C:CDC20 MEDIATED DEGRADATION OF MITOTIC PROTEINS REACTOME DATABASE ID RELEASE 71 176409	71	-0.699113	-1.41983	0.0153417	0.361095
PLATELET AGGREGATION GOBP GO:0070527	23	-0.814359	-1.41899	0.0398773	0.363853
APC-CDC20 MEDIATED DEGRADATION OF NEK2A REACTOME R-HSA-179409.2	24	-0.80727	-1.41808	0.0311042	0.367194
HSP90 CHAPERONE CYCLE FOR SHRS REACTOME R-HSA-3371497.2	34	-0.784762	-1.41779	0.0269461	0.367126
MYD88-INDEPENDENT TLR4 CASCADE REACTOME DATABASE ID RELEASE 71 166166	91	-0.682175	-1.41696	0.0159151	0.369813
CARDIAC MUSCLE TISSUE MORPHOGENESIS GOBP GO:0055008	26	-0.794842	-1.41619	0.0690738	0.3722
TRANSCRIPTION INITIATION FROM RNA POLYMERASE I PROMOTER GOBP GO:0006361	31	-0.777496	-1.4155	0.046875	0.374343
NOTCH2 ACTIVATION AND TRANSMISSION OF SIGNAL TO THE NUCLEUS REACTOME DATABASE ID RELEASE 71 2979096	19	-0.822166	-1.41533	0.0483333	0.373718
FORMATION OF INCISION COMPLEX IN GG-NER REACTOME R-HSA-5696395.1	41	-0.744954	-1.41499	0.0386266	0.37398
BIOCARTA_EIF_PATHWAY MSIGDB_C2 BIOCARTA_EIF_PATHWAY	16	-0.858283	-1.41482	0.0480769	0.373332
APC C:CDC20 MEDIATED DEGRADATION OF SECURIN REACTOME R-HSA-174154.2	64	-0.710698	-1.4146	0.0262794	0.373029
CHONDROITIN SULFATE BIOSYNTHESIS REACTOME DATABASE ID RELEASE 71 2022870	16	-0.858495	-1.41458	0.0376176	0.371665
POSITIVE REGULATION OF RESPONSE TO WOUNDING GOBP GO:1903036	35	-0.762991	-1.4143	0.0455213	0.371731
ELECTRON TRANSPORT CHAIN GOBP GO:0022900	80	-0.698036	-1.41371	0.0262794	0.37309
ASYMMETRIC LOCALIZATION OF PCP PROTEINS REACTOME R-HSA-4608870.1	61	-0.713721	-1.41355	0.0294118	0.372418
PROTEIN FOLDING GOBP GO:0006457	145	-0.648974	-1.41337	0.00878294	0.371885
HEDGEHOG 'OFF' STATE REACTOME DATABASE ID RELEASE 71 5610787	90	-0.683146	-1.41198	0.0204638	0.37763
MITOCHONDRIAL RESPIRATORY CHAIN COMPLEX IV ASSEMBLY GOBP GO:0033617	19	-0.828975	-1.4095	0.0438312	0.38876
GPI ANCHOR BIOSYNTHETIC PROCESS GOBP GO:0006506	29	-0.79915	-1.40921	0.0230769	0.388762
ACTIVATION OF APC C AND APC C:CDC20 MEDIATED DEGRADATION OF MITOTIC PROTEINS REACTOME R-HSA-176814.2	72	-0.695984	-1.40918	0.0373444	0.38741
REGULATION OF DNA DAMAGE RESPONSE, SIGNAL TRANSDUCTION BY P53 CLASS MEDIATOR GOBP GO:0043516	28	-0.798376	-1.40874	0.0471842	0.388268
22Q11.2 DELETION SYNDROME WIKIPATHWAYS_20191210 WP4657 HOMO SAPIENS	59	-0.713347	-1.40749	0.04039	0.393531
SYNTHESIS OF DNA REACTOME DATABASE ID RELEASE 71 69239	115	-0.659156	-1.40707	0.0103493	0.394372
RIBONUCLEOSIDE TRIPHOSPHATE METABOLIC PROCESS GOBP GO:0009199	156	-0.640757	-1.40702	0.0126263	0.393189
CDK-MEDIATED PHOSPHORYLATION AND REMOVAL OF CDC6 REACTOME DATABASE ID RELEASE 71 69017	68	-0.698131	-1.40669	0.0208623	0.393422
NEGATIVE REGULATION OF FGFR1 SIGNALING REACTOME R-HSA-5654726.2	19	-0.843937	-1.40607	0.0363924	0.395075
BODY MORPHOGENESIS GOBP GO:0010171	17	-0.834212	-1.40602	0.0459184	0.393883
PURINE NUCLEOSIDE TRIPHOSPHATE METABOLIC PROCESS GOBP GO:0009144	156	-0.640472	-1.40585	0.0151133	0.393209
DEGRADATION OF BETA-CATENIN BY THE DESTRUCTION COMPLEX REACTOME R-HSA-195253.2	78	-0.684713	-1.40522	0.0193638	0.394982
APC C:CDC20 MEDIATED DEGRADATION OF CYCLIN B REACTOME DATABASE ID RELEASE 71 174048	22	-0.817126	-1.40509	0.0402576	0.394296
DNA-TEMPLATED TRANSCRIPTION, TERMINATION GOBP GO:0006353	69	-0.704582	-1.40415	0.0235641	0.397727
DEADENYLATION-DEPENDENT MRNA DECAY REACTOME DATABASE ID RELEASE 71 429914	55	-0.704506	-1.4038	0.037037	0.398101
REGULATION OF SIGNAL TRANSDUCTION BY P53 CLASS MEDIATOR GOBP GO:1901796	152	-0.64448	-1.40299	0.0125471	0.4007
ASSEMBLY OF THE HIV VIRION REACTOME R-HSA-175474.1	15	-0.856957	-1.40296	0.0390244	0.399447
INFECTION WITH MYCOBACTERIUM TUBERCULOSIS REACTOME DATABASE ID RELEASE 71 9635486	22	-0.81931	-1.40283	0.0396196	0.398687
DETECTION OF STIMULUS GOBP GO:0051606	86	-0.667211	-1.40264	0.0306258	0.398386
CONSTITUTIVE SIGNALING BY AKT1 E17K IN CANCER REACTOME DATABASE ID RELEASE 71 5674400	25	-0.814349	-1.40217	0.0342679	0.399413
PI3K-AKT-MTOR SIGNALING PATHWAY AND THERAPEUTIC OPPORTUNITIES WIKIPATHWAYS_20191210 WP3844 HOMO SAPIENS	28	-0.779026	-1.40208	0.0488959	0.398519
POSITIVE REGULATION OF CALCIUM-MEDIATED SIGNALING GOBP GO:0050850	17	-0.838382	-1.40073	0.0382695	0.404274
NEGATIVE REGULATION OF FGFR2 SIGNALING REACTOME R-HSA-5654727.1	20	-0.819719	-1.39949	0.0508475	0.409116
ATP SYNTHESIS COUPLED ELECTRON TRANSPORT GOBP GO:0042773	68	-0.707078	-1.39894	0.034384	0.410437
DNA DAMAGE RESPONSE, DETECTION OF DNA DAMAGE GOBP GO:0042769	35	-0.755911	-1.39844	0.0396341	0.411658
SIALIC ACID METABOLISM REACTOME R-HSA-4085001.2	23	-0.798598	-1.39792	0.0506757	0.412937
ATRIOVENTRICULAR VALVE DEVELOPMENT GOBP GO:0003171	18	-0.826577	-1.39777	0.0607553	0.412328
INTERLEUKIN-1 SIGNALING REACTOME R-HSA-9020702.1	93	-0.676009	-1.39697	0.023224	0.415126
APC:CDC20 MEDIATED DEGRADATION OF CELL CYCLE PROTEINS PRIOR TO SATISFATION OF THE CELL CYCLE CHECKPOINT REACTOME R-HSA-179419.1	69	-0.705062	-1.39694	0.0357143	0.413819
TOLL LIKE RECEPTOR 3 (TLR3) CASCADE REACTOME R-HSA-168164.3	89	-0.684165	-1.3966	0.0305445	0.414163
MUSCLE ORGAN MORPHOGENESIS GOBP GO:0048644	28	-0.791093	-1.3957	0.0438871	0.417456
MAP KINASE ACTIVATION REACTOME R-HSA-450294.3	62	-0.707539	-1.3952	0.0321168	0.418647
PURINE RIBONUCLEOSIDE TRIPHOSPHATE METABOLIC PROCESS GOBP GO:0009205	153	-0.642612	-1.39507	0.0100376	0.417915
DNA REPLICATION WIKIPATHWAYS_20191210 WP466 HOMO SAPIENS	41	-0.736963	-1.39484	0.0484581	0.417691
HDR THROUGH HOMOLOGOUS RECOMBINATION (HRR) REACTOME DATABASE ID RELEASE 71 5685942	63	-0.706041	-1.3946	0.0264993	0.417563
NEGATIVE REGULATION OF STRESS FIBER ASSEMBLY GOBP GO:0051497	19	-0.829779	-1.39239	0.0363349	0.427588
INTERLEUKIN-17 SIGNALING REACTOME DATABASE ID RELEASE 71 448424	66	-0.686986	-1.39148	0.0479549	0.430955
CARDIAC MUSCLE CELL DIFFERENTIATION GOBP GO:0055007	28	-0.7798	-1.39027	0.0478326	0.436019
BIOCARTA_MTOR_PATHWAY MSIGDB_C2 BIOCARTA_MTOR_PATHWAY	23	-0.796885	-1.3872	0.0616333	0.450899
BIOCARTA_EIF4_PATHWAY MSIGDB_C2 BIOCARTA_EIF4_PATHWAY	23	-0.797926	-1.38684	0.0614173	0.451361
G PROTEIN SIGNALING PATHWAYS WIKIPATHWAYS_20191210 WP35 HOMO SAPIENS	72	-0.686038	-1.38682	0.0461957	0.44996
NUCLEOTIDE EXCISION REPAIR REACTOME DATABASE ID RELEASE 71 5696398	106	-0.658432	-1.38651	0.0222513	0.450161
SUMOYLATION OF DNA METHYLATION PROTEINS REACTOME DATABASE ID RELEASE 71 4655427	15	-0.847723	-1.38646	0.0416667	0.44895
MAPK6 MAPK4 SIGNALING REACTOME DATABASE ID RELEASE 71 5687128	80	-0.681564	-1.3861	0.024	0.449321
RESPONSE TO TEMPERATURE STIMULUS GOBP GO:0009266	62	-0.696234	-1.38437	0.0424077	0.45712
DOWNSTREAM SIGNALING OF ACTIVATED FGFR4 REACTOME DATABASE ID RELEASE 71 5654716	15	-0.838257	-1.38331	0.0560132	0.461362
CELLULAR RESPONSE TO HEAT STRESS REACTOME R-HSA-3371556.1	77	-0.67869	-1.38326	0.0362416	0.460215
MYD88-DEPENDENT TOLL-LIKE RECEPTOR SIGNALING PATHWAY GOBP GO:0002755	20	-0.814914	-1.38227	0.046875	0.464208
CYCLIN A:CDK2-ASSOCIATED EVENTS AT S PHASE ENTRY REACTOME R-HSA-69656.3	82	-0.680375	-1.38215	0.0314208	0.46342
TAK1 ACTIVATES NFKB BY PHOSPHORYLATION AND ACTIVATION OF IKKS COMPLEX REACTOME R-HSA-445989.3	27	-0.771645	-1.38191	0.0473934	0.463163
NUCLEOTIDE-SUGAR METABOLIC PROCESS GOBP GO:0009225	28	-0.772534	-1.3816	0.0535168	0.463348
LISTERIA MONOCYTOGENES ENTRY INTO HOST CELLS REACTOME DATABASE ID RELEASE 71 8876384	16	-0.836713	-1.37955	0.0691927	0.473479
SA_PTEN_PATHWAY MSIGDB_C2 SA_PTEN_PATHWAY	16	-0.816857	-1.37853	0.0677966	0.477409
ANTIGEN PROCESSING-CROSS PRESENTATION REACTOME R-HSA-1236975.1	79	-0.670714	-1.37742	0.027972	0.482126
RESPONSE TO GLUCOCORTICOID GOBP GO:0051384	18	-0.831897	-1.37741	0.0472313	0.48069
SUMOYLATION OF DNA DAMAGE RESPONSE AND REPAIR PROTEINS REACTOME R-HSA-3108214.2	66	-0.688494	-1.37733	0.0405594	0.479621
JNK (C-JUN KINASES) PHOSPHORYLATION AND ACTIVATION MEDIATED BY ACTIVATED HUMAN TAK1 REACTOME R-HSA-450321.2	18	-0.815638	-1.37715	0.0597484	0.47904
MACROAUTOPHAGY REACTOME DATABASE ID RELEASE 71 1632852	100	-0.65841	-1.37673	0.0359043	0.479771
DOWNREGULATION OF TGF-BETA RECEPTOR SIGNALING REACTOME R-HSA-2173788.1	24	-0.778439	-1.37613	0.0554649	0.481581
APOPTOTIC CELL CLEARANCE GOBP GO:0043277	22	-0.790327	-1.37608	0.065625	0.48038
FRAGILE X SYNDROME WIKIPATHWAYS_20191210 WP4549 HOMO SAPIENS	99	-0.656725	-1.37491	0.0359435	0.485298
ATRIOVENTRICULAR VALVE MORPHOGENESIS GOBP GO:0003181	17	-0.822933	-1.37474	0.0528053	0.484676
G1 TO S CELL CYCLE CONTROL WIKIPATHWAYS_20191210 WP45 HOMO SAPIENS	60	-0.691215	-1.37473	0.0515759	0.483275
REGULATION OF APC C ACTIVATORS BETWEEN G1 S AND EARLY ANAPHASE REACTOME DATABASE ID RELEASE 71 176408	76	-0.677363	-1.37415	0.0364146	0.484867
PID_NECTIN_PATHWAY MSIGDB_C2 PID_NECTIN_PATHWAY	28	-0.765544	-1.37378	0.0671875	0.485441
INNER MITOCHONDRIAL MEMBRANE ORGANIZATION GOBP GO:0007007	36	-0.743714	-1.37348	0.0503704	0.485552
APC C:CDH1 MEDIATED DEGRADATION OF CDC20 AND OTHER APC C:CDH1 TARGETED PROTEINS IN LATE MITOSIS EARLY G1 REACTOME R-HSA-174178.2	69	-0.686388	-1.37328	0.0540915	0.485216
TRANSCRIPTION BY RNA POLYMERASE I GOBP GO:0006360	33	-0.742638	-1.37297	0.0539683	0.485463
STRIATED MUSCLE CONTRACTION PATHWAY WIKIPATHWAYS_20191210 WP383 HOMO SAPIENS	17	-0.817563	-1.3728	0.0688	0.485099
PTEN REGULATION REACTOME DATABASE ID RELEASE 71 6807070	129	-0.636473	-1.37241	0.0217114	0.485603
REGULATION OF FIBROBLAST GROWTH FACTOR RECEPTOR SIGNALING PATHWAY GOBP GO:0040036	18	-0.812673	-1.3712	0.0584307	0.491003
COPI-INDEPENDENT GOLGI-TO-ER RETROGRADE TRAFFIC REACTOME DATABASE ID RELEASE 71 6811436	33	-0.745865	-1.37056	0.0595813	0.493044
NUCLEOTIDE-EXCISION REPAIR GOBP GO:0006289	101	-0.653363	-1.36983	0.0387701	0.495782
HALLMARK_UNFOLDED_PROTEIN_RESPONSE MSIGDB_C2 HALLMARK_UNFOLDED_PROTEIN_RESPONSE	106	-0.649894	-1.36977	0.0297158	0.49461
RESPONSE TO HEAT GOBP GO:0009408	43	-0.717773	-1.3696	0.0662739	0.493901
DNA REPLICATION REACTOME R-HSA-69306.4	122	-0.649327	-1.36902	0.0267023	0.495767
CELLULAR RESPONSE TO HEAT GOBP GO:0034605	31	-0.744611	-1.36854	0.058193	0.496895
RESPONSE TO INTERFERON-BETA GOBP GO:0035456	15	-0.823836	-1.36786	0.0717863	0.499242
POSITIVE REGULATION OF SIGNAL TRANSDUCTION BY P53 CLASS MEDIATOR GOBP GO:1901798	18	-0.815755	-1.36694	0.0691318	0.50288
REGULATION OF TRANSLATION IN RESPONSE TO STRESS GOBP GO:0043555	15	-0.828969	-1.36638	0.0684713	0.504418
GLOBAL GENOME NUCLEOTIDE EXCISION REPAIR (GG-NER) REACTOME R-HSA-5696399.1	81	-0.667748	-1.36611	0.0417246	0.504537
REGULATION OF TP53 ACTIVITY REACTOME R-HSA-5633007.3	145	-0.629864	-1.36604	0.0253485	0.503392
INSULIN RECEPTOR RECYCLING REACTOME DATABASE ID RELEASE 71 77387	21	-0.780755	-1.36526	0.0698413	0.506353
NUCLEOTIDE-EXCISION REPAIR, DNA INCISION GOBP GO:0033683	37	-0.731504	-1.36495	0.0669711	0.506616
PHAGOCYTOSIS GOBP GO:0006909	112	-0.64089	-1.36431	0.0318878	0.508739
NECTIN ADHESION PATHWAY PATHWAY INTERACTION DATABASE NCI-NATURE CURATED DATA NECTIN ADHESION PATHWAY	28	-0.765544	-1.36355	0.0597244	0.511427
RESPONSE TO MECHANICAL STIMULUS GOBP GO:0009612	64	-0.677642	-1.36317	0.0518207	0.512077
DE NOVO' POSTTRANSLATIONAL PROTEIN FOLDING GOBP GO:0051084	21	-0.792703	-1.36236	0.0633117	0.515138
RNA POLYMERASE I TRANSCRIPTION INITIATION REACTOME R-HSA-73762.3	46	-0.718631	-1.36225	0.0562771	0.514225
G1 S TRANSITION REACTOME DATABASE ID RELEASE 71 69206	127	-0.63431	-1.36177	0.0357599	0.515397
BONE REMODELING GOBP GO:0046849	18	-0.806857	-1.36151	0.0664506	0.515285
CARDIAC MUSCLE CELL DEVELOPMENT GOBP GO:0055013	18	-0.806265	-1.36147	0.0681063	0.513987
CELLULAR RESPONSE TO EXTERNAL STIMULUS GOBP GO:0071496	162	-0.624045	-1.36097	0.0174564	0.515376
TOLL LIKE RECEPTOR 7 8 (TLR7 8) CASCADE REACTOME R-HSA-168181.1	84	-0.65367	-1.35993	0.0458716	0.5197
INTERLEUKIN-1 FAMILY SIGNALING REACTOME DATABASE ID RELEASE 71 446652	112	-0.636832	-1.3598	0.0292553	0.51899
PHAGOSOME ACIDIFICATION GOBP GO:0090383	23	-0.790392	-1.35962	0.0601852	0.518483
NEGATIVE REGULATION OF DNA BIOSYNTHETIC PROCESS GOBP GO:2000279	31	-0.742138	-1.35916	0.0801816	0.519742
CELLULAR RESPONSE TO MECHANICAL STIMULUS GOBP GO:0071260	37	-0.737663	-1.35905	0.0789866	0.518864
NEGATIVE REGULATION OF INTRINSIC APOPTOTIC SIGNALING PATHWAY IN RESPONSE TO DNA DAMAGE GOBP GO:1902230	26	-0.753477	-1.35864	0.087218	0.519607
NUCLEOTIDE-EXCISION REPAIR, PREINCISION COMPLEX ASSEMBLY GOBP GO:0006294	27	-0.766256	-1.35852	0.0664557	0.518855
ACTIVATED TAK1 MEDIATES P38 MAPK ACTIVATION REACTOME R-HSA-450302.2	19	-0.8057	-1.35848	0.0645669	0.517633
DISEASES OF CARBOHYDRATE METABOLISM REACTOME R-HSA-5663084.2	27	-0.769142	-1.35695	0.0739599	0.524845
MYD88 DEPENDENT CASCADE INITIATED ON ENDOSOME REACTOME R-HSA-975155.1	84	-0.65367	-1.35675	0.0444444	0.524498
REGULATION OF CAMP-MEDIATED SIGNALING GOBP GO:0043949	15	-0.833834	-1.35662	0.0676819	0.523881
SMOOTH MUSCLE CONTRACTION GOBP GO:0006939	20	-0.796051	-1.35609	0.0976378	0.525563
FANCONI ANEMIA PATHWAY REACTOME R-HSA-6783310.2	36	-0.729647	-1.35596	0.0739687	0.524903
HORMONE METABOLIC PROCESS GOBP GO:0042445	64	-0.693734	-1.35526	0.0440341	0.52727
G2 M TRANSITION REACTOME R-HSA-69275.5	168	-0.608898	-1.35516	0.0185874	0.526362
CHONDROITIN SULFATE DERMATAN SULFATE METABOLISM REACTOME R-HSA-1793185.1	43	-0.716386	-1.35501	0.0691729	0.525824
DNA DAMAGE RECOGNITION IN GG-NER REACTOME DATABASE ID RELEASE 71 5696394	36	-0.724445	-1.35442	0.0839695	0.527531
RESPONSE OF EIF2AK1 (HRI) TO HEME DEFICIENCY REACTOME R-HSA-9648895.1	15	-0.824151	-1.35437	0.0865052	0.526388
CARDIAC MUSCLE TISSUE DEVELOPMENT GOBP GO:0048738	60	-0.679711	-1.35362	0.0597668	0.529113
CYTOPLASMIC TRANSLATIONAL INITIATION GOBP GO:0002183	15	-0.838711	-1.35268	0.0747967	0.532807
MECHANOREGULATION AND PATHOLOGY OF YAP/TAZ VIA HIPPO AND NON-HIPPO MECHANISMS WIKIPATHWAYS_20191210 WP4534 HOMO SAPIENS	39	-0.729248	-1.35248	0.0532915	0.532536
TOLL LIKE RECEPTOR 9 (TLR9) CASCADE REACTOME R-HSA-168138.1	88	-0.651902	-1.35233	0.0504202	0.531877
BIOCARTA_AKT_PATHWAY MSIGDB_C2 BIOCARTA_AKT_PATHWAY	19	-0.796235	-1.35221	0.0930979	0.531128
CELL-EXTRACELLULAR MATRIX INTERACTIONS REACTOME DATABASE ID RELEASE 71 446353	15	-0.822906	-1.35079	0.104928	0.537603
PROTEIN IMPORT GOBP GO:0017038	104	-0.635383	-1.34943	0.0445609	0.543678
THE CITRIC ACID (TCA) CYCLE AND RESPIRATORY ELECTRON TRANSPORT REACTOME R-HSA-1428517.1	151	-0.623344	-1.34941	0.028607	0.542305
BETA-CATENIN INDEPENDENT WNT SIGNALING REACTOME R-HSA-3858494.3	122	-0.62756	-1.34814	0.0419397	0.548079
DUAL INCISION IN GG-NER REACTOME DATABASE ID RELEASE 71 5696400	39	-0.732796	-1.34811	0.0527086	0.546795
NUCLEOTIDE-EXCISION REPAIR, DNA DAMAGE RECOGNITION GOBP GO:0000715	22	-0.767658	-1.34805	0.0914928	0.54574
PROTEIN IMPORT INTO MITOCHONDRIAL MATRIX GOBP GO:0030150	16	-0.808824	-1.34785	0.0890302	0.545357
HSF1-DEPENDENT TRANSACTIVATION REACTOME DATABASE ID RELEASE 71 3371571	20	-0.810328	-1.34757	0.0716612	0.545453
DE NOVO' PROTEIN FOLDING GOBP GO:0006458	25	-0.779663	-1.34725	0.0851064	0.545763
TRAF6 MEDIATED INDUCTION OF NFKB AND MAP KINASES UPON TLR7 8 OR 9 ACTIVATION REACTOME DATABASE ID RELEASE 71 975138	83	-0.656875	-1.34687	0.0522599	0.546465
RAB REGULATION OF TRAFFICKING REACTOME DATABASE ID RELEASE 71 9007101	114	-0.631225	-1.3467	0.0359435	0.545968
PCP CE PATHWAY REACTOME DATABASE ID RELEASE 71 4086400	84	-0.658644	-1.34667	0.0453333	0.544738
PID_HIF1A_PATHWAY MSIGDB_C2 PID_HIF1A_PATHWAY	15	-0.819547	-1.34642	0.0886076	0.544694
INTERLEUKIN-1-MEDIATED SIGNALING PATHWAY GOBP GO:0070498	86	-0.650214	-1.34635	0.0494652	0.543704
HYPOXIC AND OXYGEN HOMEOSTASIS REGULATION OF HIF-1-ALPHA PATHWAY INTERACTION DATABASE NCI-NATURE CURATED DATA HYPOXIC AND OXYGEN HOMEOSTASIS REGULATION OF HIF-1-ALPHA	15	-0.819547	-1.34569	0.0815661	0.546011
APC C-MEDIATED DEGRADATION OF CELL CYCLE PROTEINS REACTOME R-HSA-174143.1	82	-0.654694	-1.34536	0.0513513	0.546397
NEGATIVE REGULATION OF ACTIN FILAMENT BUNDLE ASSEMBLY GOBP GO:0032232	20	-0.804205	-1.34508	0.0698052	0.546478
REGULATION OF CALCINEURIN-MEDIATED SIGNALING GOBP GO:0106056	21	-0.792507	-1.34473	0.0846906	0.547031
HINDBRAIN DEVELOPMENT GOBP GO:0030902	26	-0.764809	-1.34421	0.0757342	0.548593
MAP2K AND MAPK ACTIVATION REACTOME DATABASE ID RELEASE 71 5674135	29	-0.744368	-1.34375	0.101881	0.549666
REGULATION OF MITOTIC CELL CYCLE REACTOME R-HSA-453276.2	82	-0.654694	-1.34025	0.042328	0.567911
NUCLEOTIDE-EXCISION REPAIR, DNA INCISION, 5'-TO LESION GOBP GO:0006296	35	-0.731963	-1.33991	0.0815385	0.568431
TBC RABGAPS REACTOME R-HSA-8854214.1	41	-0.704641	-1.33918	0.0705882	0.571104
MITOTIC G2-G2 M PHASES REACTOME R-HSA-453274.2	170	-0.608516	-1.33894	0.018315	0.571022
PID_PRL_SIGNALING_EVENTS_PATHWAY MSIGDB_C2 PID_PRL_SIGNALING_EVENTS_PATHWAY	22	-0.765156	-1.33849	0.0774194	0.572176
TGF-BETA RECEPTOR SIGNALING ACTIVATES SMADS REACTOME R-HSA-2173789.1	30	-0.74718	-1.33781	0.0826087	0.574513
CARDIAC CELL DEVELOPMENT GOBP GO:0055006	23	-0.76667	-1.33703	0.0821918	0.577478
TRICARBOXYLIC ACID METABOLIC PROCESS GOBP GO:0072350	33	-0.737068	-1.3369	0.0978916	0.576786
AEROBIC RESPIRATION GOBP GO:0009060	59	-0.684329	-1.33679	0.0723404	0.57596
OLIGOSACCHARIDE-LIPID INTERMEDIATE BIOSYNTHETIC PROCESS GOBP GO:0006490	18	-0.797527	-1.33603	0.104452	0.579017
POSITIVE REGULATION OF WOUND HEALING GOBP GO:0090303	30	-0.74682	-1.33525	0.08	0.581913
CELLULAR RESPONSE TO OXYGEN LEVELS GOBP GO:0071453	136	-0.611903	-1.33479	0.0376135	0.583154
TRANSCRIPTIONAL REGULATION BY RUNX2 REACTOME DATABASE ID RELEASE 71 8878166	104	-0.627189	-1.33428	0.0436508	0.584658
REGULATION OF PLK1 ACTIVITY AT G2 M TRANSITION REACTOME R-HSA-2565942.1	79	-0.64397	-1.33383	0.0585886	0.585714
CHONDROITIN SULFATE PROTEOGLYCAN BIOSYNTHETIC PROCESS GOBP GO:0050650	21	-0.779941	-1.33323	0.096875	0.587826
FOXO-MEDIATED TRANSCRIPTION OF CELL DEATH GENES REACTOME DATABASE ID RELEASE 71 9614657	15	-0.802967	-1.33233	0.1	0.591527
REGULATION OF MACROPHAGE MIGRATION GOBP GO:1905521	15	-0.821782	-1.33232	0.0793919	0.590143
PID_HDAC_CLASSIII_PATHWAY MSIGDB_C2 PID_HDAC_CLASSIII_PATHWAY	20	-0.774894	-1.33136	0.0859375	0.594196
SIGNAL AMPLIFICATION REACTOME R-HSA-392518.1	23	-0.758438	-1.33127	0.0818182	0.593209
RESPONSE TO CORTICOSTEROID GOBP GO:0031960	20	-0.772959	-1.33082	0.122187	0.594221
RRNA PROCESSING GOBP GO:0006364	172	-0.610175	-1.33064	0.0327273	0.593855
S PHASE REACTOME DATABASE ID RELEASE 71 69242	155	-0.6113	-1.3306	0.0270936	0.592629
NONGENOTROPIC ANDROGEN SIGNALING PATHWAY INTERACTION DATABASE NCI-NATURE CURATED DATA NONGENOTROPIC ANDROGEN SIGNALING	28	-0.737592	-1.32965	0.0983103	0.596624
TOLL LIKE RECEPTOR 10 (TLR10) CASCADE REACTOME R-HSA-168142.1	80	-0.649524	-1.32889	0.0513513	0.599426
MYD88 CASCADE INITIATED ON PLASMA MEMBRANE REACTOME DATABASE ID RELEASE 71 975871	80	-0.649524	-1.32885	0.0742779	0.598177
SIGNALING BY HEDGEHOG REACTOME DATABASE ID RELEASE 71 5358351	120	-0.628574	-1.32874	0.0442133	0.597377
PEPTIDYL-PROLINE MODIFICATION GOBP GO:0018208	30	-0.742769	-1.32832	0.0754148	0.598386
MIR-509-3P ALTERATION OF YAP1/ECM AXIS WIKIPATHWAYS_20191210 WP3967 HOMO SAPIENS	16	-0.808672	-1.3283	0.0836066	0.597079
MATURATION OF LSU-RRNA GOBP GO:0000470	27	-0.74242	-1.32828	0.0823723	0.5958
DOWNREGULATION OF SMAD2 3:SMAD4 TRANSCRIPTIONAL ACTIVITY REACTOME DATABASE ID RELEASE 71 2173795	22	-0.764769	-1.32688	0.101721	0.602122
CELLULAR RESPONSE TO NUTRIENT LEVELS GOBP GO:0031669	120	-0.617113	-1.32668	0.0436457	0.60188
REGULATION OF ACTIVATED T CELL PROLIFERATION GOBP GO:0046006	19	-0.778991	-1.32646	0.112698	0.601691
RIBONUCLEOSIDE MONOPHOSPHATE METABOLIC PROCESS GOBP GO:0009161	163	-0.600821	-1.32639	0.0309789	0.600719
NECROPTOTIC PROCESS GOBP GO:0070266	15	-0.81281	-1.32603	0.113903	0.601325
PID_S1P_S1P3_PATHWAY MSIGDB_C2 PID_S1P_S1P3_PATHWAY	26	-0.748789	-1.32594	0.113323	0.600386
PID_AR_NONGENOMIC_PATHWAY MSIGDB_C2 PID_AR_NONGENOMIC_PATHWAY	28	-0.737592	-1.32561	0.104294	0.600986
TRANSLATIONAL ELONGATION GOBP GO:0006414	103	-0.630059	-1.32376	0.0309556	0.609911
PID_HEDGEHOG_2PATHWAY MSIGDB_C2 PID_HEDGEHOG_2PATHWAY	16	-0.8033	-1.32243	0.0995185	0.615834
CELLULAR RESPONSE TO TUMOR NECROSIS FACTOR GOBP GO:0071356	132	-0.613447	-1.32234	0.0397022	0.614965
OVARIAN TUMOR DOMAIN PROTEASES REACTOME DATABASE ID RELEASE 71 5689896	34	-0.709604	-1.32203	0.0924242	0.615346
NEGATIVE REGULATION OF TRANSLATIONAL INITIATION GOBP GO:0045947	17	-0.786076	-1.32147	0.131579	0.617074
ALZHEIMER DISEASE-AMYLOID SECRETASE PATHWAY PANTHER PATHWAY P00003	47	-0.679536	-1.32054	0.0933908	0.620895
CHAPERONE COFACTOR-DEPENDENT PROTEIN REFOLDING GOBP GO:0051085	17	-0.800177	-1.31958	0.0977199	0.624761
UNTITLED PANTHER PATHWAY P00019	49	-0.684324	-1.31904	0.0964029	0.626413
PURINE RIBONUCLEOSIDE MONOPHOSPHATE METABOLIC PROCESS GOBP GO:0009167	160	-0.598426	-1.31904	0.0495663	0.624999
NEGATIVE REGULATION OF CELL CYCLE G2/M PHASE TRANSITION GOBP GO:1902750	89	-0.643248	-1.31878	0.0605227	0.625019
BIOCARTA_PTEN_PATHWAY MSIGDB_C2 BIOCARTA_PTEN_PATHWAY	17	-0.798012	-1.31871	0.118729	0.6241
TOLL LIKE RECEPTOR 5 (TLR5) CASCADE REACTOME DATABASE ID RELEASE 71 168176	80	-0.649524	-1.31786	0.0602094	0.627338
SIGNALING EVENTS MEDIATED BY THE HEDGEHOG FAMILY PATHWAY INTERACTION DATABASE NCI-NATURE CURATED DATA SIGNALING EVENTS MEDIATED BY THE HEDGEHOG FAMILY	16	-0.8033	-1.31718	0.105	0.629935
REGULATION OF VASCULAR ENDOTHELIAL GROWTH FACTOR PRODUCTION GOBP GO:0010574	18	-0.779824	-1.31608	0.117739	0.634894
DETECTION OF CHEMICAL STIMULUS GOBP GO:0009593	19	-0.776699	-1.3157	0.0949153	0.635559
GLYCOLYSIS AND GLUCONEOGENESIS WIKIPATHWAYS_20191210 WP534 HOMO SAPIENS	33	-0.717077	-1.31551	0.10089	0.635159
POSITIVE REGULATION OF PROTEASOMAL PROTEIN CATABOLIC PROCESS GOBP GO:1901800	76	-0.642147	-1.31464	0.0758621	0.638669
RNA 5'-END PROCESSING GOBP GO:0000966	18	-0.787471	-1.31251	0.111111	0.649452
REGULATION OF CALCINEURIN-NFAT SIGNALING CASCADE GOBP GO:0070884	20	-0.769996	-1.31213	0.133748	0.650209
DISEASES ASSOCIATED WITH N-GLYCOSYLATION OF PROTEINS REACTOME DATABASE ID RELEASE 71 3781860	17	-0.795276	-1.31207	0.106209	0.649049
DNA CATABOLIC PROCESS, ENDONUCLEOLYTIC GOBP GO:0000737	19	-0.772368	-1.31204	0.124224	0.64787
UCH PROTEINASES REACTOME DATABASE ID RELEASE 71 5689603	80	-0.644086	-1.31153	0.070028	0.649362
NUCLEOSIDE MONOPHOSPHATE METABOLIC PROCESS GOBP GO:0009123	168	-0.596682	-1.3112	0.0358025	0.649846
HOMOTYPIC CELL-CELL ADHESION GOBP GO:0034109	31	-0.711738	-1.31116	0.119048	0.64865
RESPONSE TO TUMOR NECROSIS FACTOR GOBP GO:0034612	145	-0.605198	-1.31081	0.0374194	0.649133
DOLICHOL-LINKED OLIGOSACCHARIDE BIOSYNTHETIC PROCESS GOBP GO:0006488	17	-0.783709	-1.31003	0.114148	0.652144
METABOLIC REPROGRAMMING IN COLON CANCER WIKIPATHWAYS_20191210 WP4290 HOMO SAPIENS	38	-0.701355	-1.30991	0.108793	0.651402
DNA CATABOLIC PROCESS GOBP GO:0006308	24	-0.741544	-1.30984	0.117465	0.650373
SIGNALING BY NOTCH1 IN CANCER REACTOME R-HSA-2644603.2	51	-0.663769	-1.3096	0.0886628	0.650285
SIGNALING BY NOTCH2 REACTOME R-HSA-1980145.2	28	-0.73802	-1.30956	0.114729	0.649075
PROTEIN AUTOUBIQUITINATION GOBP GO:0051865	57	-0.667094	-1.30943	0.0838068	0.64837
ACTIN FILAMENT-BASED MOVEMENT GOBP GO:0030048	60	-0.655243	-1.30908	0.103208	0.64881
INTERSTRAND CROSS-LINK REPAIR GOBP GO:0036297	50	-0.678793	-1.30902	0.0953058	0.647767
ENERGY DERIVATION BY OXIDATION OF ORGANIC COMPOUNDS GOBP GO:0015980	149	-0.601442	-1.30823	0.0504414	0.650873
PURINE NUCLEOSIDE MONOPHOSPHATE METABOLIC PROCESS GOBP GO:0009126	160	-0.598426	-1.30791	0.0455696	0.651342
PEPTIDE HORMONE PROCESSING GOBP GO:0016486	17	-0.787541	-1.30785	0.135861	0.650264
SIGNALING EVENTS MEDIATED BY PRL PATHWAY INTERACTION DATABASE NCI-NATURE CURATED DATA SIGNALING EVENTS MEDIATED BY PRL	22	-0.765156	-1.30708	0.115142	0.653393
HALLMARK_HYPOXIA MSIGDB_C2 HALLMARK_HYPOXIA	173	-0.593949	-1.3059	0.0372671	0.658604
BIOCARTA_UCALPAIN_PATHWAY MSIGDB_C2 BIOCARTA_UCALPAIN_PATHWAY	15	-0.79902	-1.30586	0.134426	0.657428
OVERVIEW OF NANOPARTICLE EFFECTS WIKIPATHWAYS_20191210 WP3287 HOMO SAPIENS	15	-0.796475	-1.30512	0.123003	0.660276
CONSTITUTIVE SIGNALING BY NOTCH1 HD+PEST DOMAIN MUTANTS REACTOME DATABASE ID RELEASE 71 2894862	51	-0.663769	-1.30484	0.0888889	0.660458
ISOPRENOID METABOLIC PROCESS GOBP GO:0006720	55	-0.671628	-1.30477	0.0870827	0.659434
GLOBAL GENOME NUCLEOTIDE-EXCISION REPAIR GOBP GO:0070911	25	-0.746083	-1.30385	0.119751	0.663312
CRISTAE FORMATION REACTOME DATABASE ID RELEASE 71 8949613	28	-0.721185	-1.30322	0.105754	0.665548
SIGNALING BY HIGH-KINASE ACTIVITY BRAF MUTANTS REACTOME R-HSA-6802948.1	25	-0.750877	-1.30296	0.0906389	0.665663
BIOCARTA_CELLCYCLE_PATHWAY MSIGDB_C2 BIOCARTA_CELLCYCLE_PATHWAY	21	-0.766165	-1.30272	0.125997	0.665686
GLYCOSYLATION AND RELATED CONGENITAL DEFECTS WIKIPATHWAYS_20191210 WP4521 HOMO SAPIENS	25	-0.741061	-1.30238	0.134585	0.66614
NUCLEOSIDE TRIPHOSPHATE METABOLIC PROCESS GOBP GO:0009141	170	-0.585717	-1.30212	0.0441718	0.666217
NCRNA 5'-END PROCESSING GOBP GO:0034471	17	-0.7876	-1.30187	0.118971	0.666263
FOLLICLE STIMULATING HORMONE (FSH) SIGNALING PATHWAY WIKIPATHWAYS_20191210 WP2035 HOMO SAPIENS	21	-0.755746	-1.30158	0.135225	0.666532
CHAPERONE-MEDIATED PROTEIN FOLDING GOBP GO:0061077	39	-0.698142	-1.30158	0.104106	0.665191
NEDDYLATION REACTOME DATABASE ID RELEASE 71 8951664	203	-0.581632	-1.30135	0.0349819	0.665183
PROTEIN UBIQUITINATION REACTOME R-HSA-8852135.2	61	-0.654806	-1.30093	0.0812772	0.666194
POSITIVE REGULATION OF VASCULAR ENDOTHELIAL GROWTH FACTOR PRODUCTION GOBP GO:0010575	17	-0.77991	-1.29963	0.147014	0.672305
PID_S1P_S1P1_PATHWAY MSIGDB_C2 PID_S1P_S1P1_PATHWAY	18	-0.771605	-1.29809	0.147107	0.679566
CIRCADIAN CLOCK REACTOME R-HSA-400253.3	62	-0.644289	-1.29784	0.0799439	0.679615
CELLULAR RESPONSE TO HYPOXIA GOBP GO:0071456	122	-0.596472	-1.29726	0.0733591	0.681497
ANAPHASE-PROMOTING COMPLEX-DEPENDENT CATABOLIC PROCESS GOBP GO:0031145	77	-0.63676	-1.29691	0.0864553	0.681995
AGGREPHAGY REACTOME R-HSA-9646399.1	21	-0.763117	-1.29636	0.140888	0.683796
INTRACELLULAR LIPID TRANSPORT GOBP GO:0032365	28	-0.717343	-1.29631	0.120357	0.682675
ANTIGEN ACTIVATES B CELL RECEPTOR (BCR) LEADING TO GENERATION OF SECOND MESSENGERS REACTOME R-HSA-983695.3	18	-0.766205	-1.29564	0.143079	0.685067
FCERI MEDIATED CA+2 MOBILIZATION REACTOME R-HSA-2871809.1	16	-0.789957	-1.2951	0.118227	0.686637
NUCLEOTIDE-EXCISION REPAIR, DNA DUPLEX UNWINDING GOBP GO:0000717	21	-0.762989	-1.2942	0.14178	0.690479
SIGNALING BY FGFR2 REACTOME DATABASE ID RELEASE 71 5654738	53	-0.664637	-1.29409	0.115169	0.689727
5HT1 TYPE RECEPTOR MEDIATED SIGNALING PATHWAY PANTHER PATHWAY P04373	28	-0.732469	-1.29396	0.122222	0.688976
INTERACTOME OF POLYCOMB REPRESSIVE COMPLEX 2 (PRC2) WIKIPATHWAYS_20191210 WP2916 HOMO SAPIENS	16	-0.775551	-1.29326	0.13255	0.691457
TOLL LIKE RECEPTOR TLR6:TLR2 CASCADE REACTOME DATABASE ID RELEASE 71 168188	87	-0.616443	-1.29262	0.0949868	0.693894
IL1-MEDIATED SIGNALING EVENTS PATHWAY INTERACTION DATABASE NCI-NATURE CURATED DATA IL1-MEDIATED SIGNALING EVENTS	28	-0.718274	-1.29227	0.117555	0.694406
RESPONSE TO MOLECULE OF BACTERIAL ORIGIN GOBP GO:0002237	103	-0.611161	-1.29198	0.0581081	0.694701
ACTIN-MYOSIN FILAMENT SLIDING GOBP GO:0033275	17	-0.775381	-1.29194	0.129848	0.693572
ETHANOL EFFECTS ON HISTONE MODIFICATIONS WIKIPATHWAYS_20191210 WP3996 HOMO SAPIENS	26	-0.741907	-1.29173	0.135747	0.693355
PROTEIN REFOLDING GOBP GO:0042026	22	-0.746641	-1.29159	0.127869	0.692823
INTEGRIN SIGNALING REACTOME R-HSA-354192.2	19	-0.756451	-1.29153	0.147899	0.691788
SIGNALING BY NOTCH1 HD+PEST DOMAIN MUTANTS IN CANCER REACTOME R-HSA-2894858.1	51	-0.663769	-1.29046	0.0933908	0.696517
SULFUR COMPOUND CATABOLIC PROCESS GOBP GO:0044273	36	-0.708642	-1.2899	0.114329	0.698224
CELLULAR RESPONSE TO BIOTIC STIMULUS GOBP GO:0071216	84	-0.623338	-1.28941	0.0882759	0.699477
PROGRAMMED CELL DEATH REACTOME R-HSA-5357801.2	148	-0.589552	-1.28886	0.0600751	0.701292
RESPONSE TO BACTERIUM GOBP GO:0009617	145	-0.59842	-1.28881	0.0459627	0.70025
ST_MYOCYTE_AD_PATHWAY MSIGDB_C2 ST_MYOCYTE_AD_PATHWAY	18	-0.767542	-1.28864	0.144427	0.699887
PID_IL1_PATHWAY MSIGDB_C2 PID_IL1_PATHWAY	28	-0.718274	-1.28854	0.139905	0.698999
SUMOYLATION OF RNA BINDING PROTEINS REACTOME R-HSA-4570464.2	40	-0.691821	-1.2874	0.10503	0.704065
MUCOPOLYSACCHARIDE METABOLIC PROCESS GOBP GO:1903510	70	-0.638023	-1.2868	0.0938375	0.706164
MUSCLE CELL DEVELOPMENT GOBP GO:0055001	53	-0.661044	-1.28664	0.126241	0.705662
HISTONE UBIQUITINATION GOBP GO:0016574	37	-0.693856	-1.28539	0.13643	0.711532
SIGNALING BY BRAF AND RAF FUSIONS REACTOME R-HSA-6802952.1	51	-0.675749	-1.28484	0.111272	0.713269
CELL-SUBSTRATE JUNCTION ASSEMBLY GOBP GO:0007044	27	-0.71218	-1.28483	0.159375	0.711963
PLATELET AGGREGATION (PLUG FORMATION) REACTOME R-HSA-76009.2	22	-0.745511	-1.28438	0.128728	0.713192
RAC PROTEIN SIGNAL TRANSDUCTION GOBP GO:0016601	15	-0.797865	-1.28403	0.137031	0.713843
COPPER HOMEOSTASIS WIKIPATHWAYS_20191210 WP3286 HOMO SAPIENS	40	-0.68242	-1.28359	0.128467	0.714983
HALLMARK_UV_RESPONSE_UP MSIGDB_C2 HALLMARK_UV_RESPONSE_UP	133	-0.596896	-1.28341	0.0664994	0.714669
REGULATION OF RNA SPLICING GOBP GO:0043484	111	-0.606612	-1.28327	0.078125	0.714114
PI3 KINASE PATHWAY PANTHER PATHWAY P00048	38	-0.67816	-1.28269	0.138686	0.715984
COOPERATION OF PDCL (PHLP1) AND TRIC CCT IN G-PROTEIN BETA FOLDING REACTOME R-HSA-6814122.2	32	-0.705628	-1.28265	0.141985	0.714835
CELLULAR RESPONSE TO STARVATION GOBP GO:0009267	92	-0.614849	-1.28213	0.0925414	0.716444
HEART MORPHOGENESIS GOBP GO:0003007	103	-0.611003	-1.28182	0.0841121	0.716719
HEPARAN SULFATE PROTEOGLYCAN METABOLIC PROCESS GOBP GO:0030201	19	-0.768236	-1.28154	0.154705	0.716941
CONSTITUTIVE SIGNALING BY NOTCH1 PEST DOMAIN MUTANTS REACTOME DATABASE ID RELEASE 71 2644606	51	-0.663769	-1.28093	0.146763	0.71903
MYD88:MAL(TIRAP) CASCADE INITIATED ON PLASMA MEMBRANE REACTOME DATABASE ID RELEASE 71 166058	87	-0.616443	-1.28082	0.0860927	0.718351
NOTCH1 INTRACELLULAR DOMAIN REGULATES TRANSCRIPTION REACTOME DATABASE ID RELEASE 71 2122947	39	-0.681514	-1.28032	0.124269	0.719805
SELECTIVE AUTOPHAGY REACTOME DATABASE ID RELEASE 71 9663891	51	-0.660912	-1.28	0.119829	0.720231
AUTOPHAGOSOME MATURATION GOBP GO:0097352	26	-0.715245	-1.27996	0.153968	0.719112
E3 UBIQUITIN LIGASES UBIQUITINATE TARGET PROTEINS REACTOME R-HSA-8866654.3	41	-0.680407	-1.27977	0.130178	0.718793
STRIATED MUSCLE CELL DEVELOPMENT GOBP GO:0055002	44	-0.666037	-1.27965	0.137931	0.718168
TOLL LIKE RECEPTOR TLR1:TLR2 CASCADE REACTOME DATABASE ID RELEASE 71 168179	87	-0.616443	-1.2794	0.0798376	0.718174
GLYCOGEN METABOLISM REACTOME R-HSA-8982491.1	23	-0.730887	-1.27881	0.173291	0.720246
PID_HIF2PATHWAY MSIGDB_C2 PID_HIF2PATHWAY	30	-0.712772	-1.27866	0.123547	0.719741
GENERATION OF PRECURSOR METABOLITES AND ENERGY GOBP GO:0006091	228	-0.562	-1.27751	0.035545	0.724874
SIGNALING BY NOTCH1 PEST DOMAIN MUTANTS IN CANCER REACTOME DATABASE ID RELEASE 71 2644602	51	-0.663769	-1.27619	0.114243	0.73085
POSITIVE REGULATION OF PROTEIN CATABOLIC PROCESS GOBP GO:0045732	153	-0.581075	-1.27618	0.0724095	0.729624
AXON GUIDANCE REACTOME DATABASE ID RELEASE 71 422475	430	-0.545972	-1.27559	0.0173348	0.731433
CELLULAR RESPONSE TO TRANSFORMING GROWTH FACTOR BETA STIMULUS GOBP GO:0071560	89	-0.618494	-1.27523	0.105702	0.732141
PEPTIDYL-GLUTAMIC ACID MODIFICATION GOBP GO:0018200	18	-0.746918	-1.27481	0.159869	0.733146
ANTIVIRAL MECHANISM BY IFN-STIMULATED GENES REACTOME R-HSA-1169410.3	68	-0.632008	-1.27475	0.112344	0.732121
PLATELET ACTIVATION GOBP GO:0030168	77	-0.621971	-1.27457	0.106809	0.731806
NEGATIVE REGULATION OF CELL CYCLE PROCESS GOBP GO:0010948	259	-0.561957	-1.27433	0.0584795	0.731714
HIF-2-ALPHA TRANSCRIPTION FACTOR NETWORK PATHWAY INTERACTION DATABASE NCI-NATURE CURATED DATA HIF-2-ALPHA TRANSCRIPTION FACTOR NETWORK	30	-0.712772	-1.27389	0.142643	0.732877
POSITIVE REGULATION OF SMOOTH MUSCLE CELL PROLIFERATION GOBP GO:0048661	33	-0.700067	-1.27286	0.141369	0.737383
MUSCLE FILAMENT SLIDING GOBP GO:0030049	17	-0.775381	-1.27178	0.133226	0.741891
RAB GEFS EXCHANGE GTP FOR GDP ON RABS REACTOME R-HSA-8876198.3	85	-0.618135	-1.27154	0.0982019	0.74191
INSERTION OF TAIL-ANCHORED PROTEINS INTO THE ENDOPLASMIC RETICULUM MEMBRANE REACTOME DATABASE ID RELEASE 71 9609523	18	-0.756355	-1.27047	0.176752	0.746628
TRANSCRIPTIONAL REGULATION BY RUNX3 REACTOME DATABASE ID RELEASE 71 8878159	91	-0.612464	-1.2702	0.111257	0.746917
TOLL LIKE RECEPTOR 2 (TLR2) CASCADE REACTOME R-HSA-181438.1	87	-0.616443	-1.27016	0.101509	0.745812
RESPONSE TO TRANSFORMING GROWTH FACTOR BETA GOBP GO:0071559	94	-0.608367	-1.2701	0.104603	0.744842
AXON GUIDANCE MEDIATED BY SLIT ROBO PANTHER PATHWAY P00008	16	-0.758931	-1.26911	0.167442	0.749108
BIOSYNTHESIS OF THE N-GLYCAN PRECURSOR (DOLICHOL LIPID-LINKED OLIGOSACCHARIDE, LLO) AND TRANSFER TO A NASCENT PROTEIN REACTOME DATABASE ID RELEASE 71 446193	65	-0.636026	-1.26835	0.125874	0.752013
CRISTAE FORMATION GOBP GO:0042407	27	-0.713479	-1.26815	0.157165	0.751758
TOLL LIKE RECEPTOR 4 (TLR4) CASCADE REACTOME R-HSA-166016.2	111	-0.595695	-1.26794	0.0819462	0.751518
CELLULAR RESPONSE TO DECREASED OXYGEN LEVELS GOBP GO:0036294	125	-0.589071	-1.26794	0.076723	0.750187
REGULATION OF NEURONAL SYNAPTIC PLASTICITY GOBP GO:0048168	19	-0.747936	-1.2677	0.148581	0.750237
SIGNALING BY NOTCH4 REACTOME R-HSA-9013694.2	75	-0.631461	-1.26746	0.102921	0.750291
REGULATION OF GLYCOGEN METABOLIC PROCESS GOBP GO:0070873	21	-0.73204	-1.26697	0.156894	0.751752
METHIONINE DE NOVO AND SALVAGE PATHWAY WIKIPATHWAYS_20191210 WP3580 HOMO SAPIENS	18	-0.751978	-1.26643	0.163009	0.753359
APOPTOSIS REACTOME R-HSA-109581.3	146	-0.582882	-1.2664	0.0782396	0.752202
RRNA METABOLIC PROCESS GOBP GO:0016072	195	-0.569124	-1.26556	0.0698795	0.755458
MITOCHONDRIAL ATP SYNTHESIS COUPLED PROTON TRANSPORT GOBP GO:0042776	18	-0.764258	-1.26532	0.160131	0.755428
DEACTIVATION OF THE BETA-CATENIN TRANSACTIVATING COMPLEX REACTOME R-HSA-3769402.3	35	-0.682092	-1.26504	0.154688	0.755591
TUMOR NECROSIS FACTOR-MEDIATED SIGNALING PATHWAY GOBP GO:0033209	93	-0.602698	-1.26484	0.0994624	0.75546
ROLE OF PHOSPHOLIPIDS IN PHAGOCYTOSIS REACTOME R-HSA-2029485.1	18	-0.758295	-1.26438	0.168301	0.756723
ENKEPHALIN RELEASE PANTHER PATHWAY P05913	21	-0.748737	-1.26425	0.178571	0.756129
PID_P38_ALPHA_BETA_DOWNSTREAM_PATHWAY MSIGDB_C2 PID_P38_ALPHA_BETA_DOWNSTREAM_PATHWAY	35	-0.68863	-1.26327	0.117302	0.760302
MYOFIBRIL ASSEMBLY GOBP GO:0030239	27	-0.717941	-1.26313	0.175655	0.759814
GLUTAMINE FAMILY AMINO ACID METABOLIC PROCESS GOBP GO:0009064	32	-0.685055	-1.26271	0.138686	0.760752
SPHINGOLIPID DE NOVO BIOSYNTHESIS REACTOME R-HSA-1660661.6	30	-0.698266	-1.26192	0.150555	0.763887
PROTEIN K48-LINKED DEUBIQUITINATION GOBP GO:0071108	20	-0.738847	-1.26167	0.165247	0.763945
3-PHOSPHOINOSITIDE BIOSYNTHESIS HUMANCYC PWY-6352	21	-0.744147	-1.26149	0.18949	0.763576
CELLULAR RESPONSE TO RETINOIC ACID GOBP GO:0071300	27	-0.700443	-1.26148	0.150769	0.762324
SIGNALING MEDIATED BY P38-ALPHA AND P38-BETA PATHWAY INTERACTION DATABASE NCI-NATURE CURATED DATA SIGNALING MEDIATED BY P38-ALPHA AND P38-BETA	32	-0.689131	-1.26127	0.134259	0.762224
B CELL RECEPTOR SIGNALING PATHWAY WIKIPATHWAYS_20191210 WP23 HOMO SAPIENS	78	-0.612694	-1.25802	0.129655	0.778824
ADP SIGNALLING THROUGH P2Y PURINOCEPTOR 12 REACTOME R-HSA-392170.2	15	-0.766922	-1.25784	0.160066	0.778503
FORMATION OF ATP BY CHEMIOSMOTIC COUPLING REACTOME DATABASE ID RELEASE 71 163210	15	-0.770717	-1.25769	0.188088	0.778138
INSULIN RECEPTOR SIGNALING PATHWAY GOBP GO:0008286	63	-0.639097	-1.25744	0.124481	0.778163
PID_HEDGEHOG_GLI_PATHWAY MSIGDB_C2 PID_HEDGEHOG_GLI_PATHWAY	44	-0.655737	-1.25688	0.173516	0.779878
NO/CGMP/PKG MEDIATED NEUROPROTECTION WIKIPATHWAYS_20191210 WP4008 HOMO SAPIENS	28	-0.697972	-1.25684	0.172524	0.778737
P53 PATHWAY PANTHER PATHWAY P00059	39	-0.668993	-1.25667	0.139501	0.778371
RESPONSE TO LIPOPOLYSACCHARIDE GOBP GO:0032496	95	-0.600359	-1.2566	0.116951	0.777494
CELLULAR RESPONSE TO LIPOPOLYSACCHARIDE GOBP GO:0071222	63	-0.635669	-1.25657	0.110955	0.776351
MTOR SIGNALING PATHWAY PATHWAY INTERACTION DATABASE NCI-NATURE CURATED DATA MTOR SIGNALING PATHWAY	62	-0.633496	-1.25622	0.129707	0.777056
PHOSPHATIDYLSERINE METABOLIC PROCESS GOBP GO:0006658	17	-0.749424	-1.25588	0.184713	0.777593
HALLMARK_KRAS_SIGNALING_DN MSIGDB_C2 HALLMARK_KRAS_SIGNALING_DN	87	-0.606663	-1.25565	0.119303	0.777507
MUSCLE CONTRACTION GOBP GO:0006936	112	-0.593501	-1.25509	0.116517	0.779455
INTRACELLULAR TRANSPORT OF VIRUS GOBP GO:0075733	45	-0.6654	-1.25492	0.139332	0.779091
ESTABLISHMENT OF PROTEIN LOCALIZATION TO PLASMA MEMBRANE GOBP GO:0061951	42	-0.673734	-1.2547	0.147445	0.778923
ISG15 ANTIVIRAL MECHANISM REACTOME DATABASE ID RELEASE 71 1169408	63	-0.635168	-1.2546	0.118168	0.778181
UREA CYCLE AND METABOLISM OF AMINO GROUPS WIKIPATHWAYS_20191210 WP497 HOMO SAPIENS	17	-0.758273	-1.25438	0.178744	0.77814
POSITIVE REGULATION OF TRANSFORMING GROWTH FACTOR BETA RECEPTOR SIGNALING PATHWAY GOBP GO:0030511	19	-0.738356	-1.25413	0.178849	0.778213
ALZHEIMER DISEASE-PRESENILIN PATHWAY PANTHER PATHWAY P00004	83	-0.605703	-1.25394	0.113976	0.778022
RESPONSE TO STARVATION GOBP GO:0042594	103	-0.594565	-1.25391	0.107374	0.776879
CELLULAR RESPONSE TO MOLECULE OF BACTERIAL ORIGIN GOBP GO:0071219	69	-0.631202	-1.25382	0.119769	0.776177
BCR NETPATH BCR	127	-0.585014	-1.25313	0.0920882	0.778713
PH REDUCTION GOBP GO:0045851	36	-0.66904	-1.253	0.164006	0.778126
TERPENOID METABOLIC PROCESS GOBP GO:0006721	42	-0.662027	-1.2527	0.157353	0.778455
CELLULAR SENESCENCE REACTOME DATABASE ID RELEASE 71 2559583	128	-0.586798	-1.25268	0.0893998	0.777289
NEURAL PRECURSOR CELL PROLIFERATION GOBP GO:0061351	24	-0.720793	-1.25165	0.171607	0.781726
MUSCLE SYSTEM PROCESS GOBP GO:0003012	126	-0.58221	-1.25113	0.1	0.783322
FEMALE PREGNANCY GOBP GO:0007565	22	-0.720744	-1.25079	0.190096	0.783879
POSITIVE REGULATION OF CHEMOKINE PRODUCTION GOBP GO:0032722	23	-0.723489	-1.25063	0.179012	0.783458
CCR7 IOB CCR7	20	-0.739656	-1.25045	0.173846	0.783161
TERMINATION OF RNA POLYMERASE II TRANSCRIPTION GOBP GO:0006369	34	-0.684658	-1.2499	0.182099	0.784972
RESPONSE TO CATECHOLAMINE GOBP GO:0071869	16	-0.755476	-1.24964	0.171901	0.785103
NEGATIVE REGULATION OF CALCIUM-MEDIATED SIGNALING GOBP GO:0050849	17	-0.748821	-1.24806	0.184	0.792647
CELLULAR RESPONSE TO MONOAMINE STIMULUS GOBP GO:0071868	16	-0.755476	-1.24785	0.172598	0.792496
CYTOSKELETAL REGULATION BY RHO GTPASE PANTHER PATHWAY P00016	48	-0.65175	-1.24763	0.158284	0.792386
PHAGOSOME MATURATION GOBP GO:0090382	32	-0.68076	-1.24762	0.1625	0.791179
PROTEIN TRANSMEMBRANE TRANSPORT GOBP GO:0071806	48	-0.636887	-1.24707	0.144315	0.792834
BIOCARTA_EDG1_PATHWAY MSIGDB_C2 BIOCARTA_EDG1_PATHWAY	23	-0.720134	-1.24661	0.16944	0.794064
ABC-FAMILY PROTEINS MEDIATED TRANSPORT REACTOME R-HSA-382556.4	86	-0.604066	-1.24585	0.120577	0.797082
INTRACELLULAR PROTEIN TRANSMEMBRANE TRANSPORT GOBP GO:0065002	46	-0.653342	-1.24532	0.156835	0.798747
PLASMA LIPOPROTEIN PARTICLE CLEARANCE GOBP GO:0034381	23	-0.718318	-1.24518	0.184962	0.798225
PRIMARY FOCAL SEGMENTAL GLOMERULOSCLEROSIS FSGS WIKIPATHWAYS_20191210 WP2572 HOMO SAPIENS	58	-0.636586	-1.24515	0.123055	0.797079
ERYTHROCYTE HOMEOSTASIS GOBP GO:0034101	31	-0.681001	-1.24425	0.164062	0.80084
ACTIN NUCLEATION GOBP GO:0045010	15	-0.753232	-1.24363	0.187291	0.802894
VEGFA-VEGFR2 SIGNALING WIKIPATHWAYS_20191210 WP3888 HOMO SAPIENS	389	-0.527701	-1.24337	0.0369565	0.802967
PEROXISOMAL MEMBRANE TRANSPORT GOBP GO:0015919	15	-0.766947	-1.24162	0.187909	0.811135
CHOLESTEROL HOMEOSTASIS GOBP GO:0042632	41	-0.657914	-1.24147	0.145185	0.810723
PURINE RIBONUCLEOTIDE METABOLIC PROCESS GOBP GO:0009150	271	-0.544264	-1.24122	0.0754286	0.810826
POSITIVE REGULATION OF CELLULAR RESPONSE TO TRANSFORMING GROWTH FACTOR BETA STIMULUS GOBP GO:1903846	19	-0.738356	-1.24075	0.190096	0.812185
PROTEIN PROCESSING GOBP GO:0016485	92	-0.591468	-1.24055	0.130027	0.811982
MEMBRANE LIPID BIOSYNTHETIC PROCESS GOBP GO:0046467	93	-0.592545	-1.23977	0.124174	0.815054
LYMPHOCYTE ACTIVATION INVOLVED IN IMMUNE RESPONSE GOBP GO:0002285	35	-0.671724	-1.23905	0.155977	0.817766
CELLULAR RESPONSE TO OXIDATIVE STRESS GOBP GO:0034599	144	-0.567174	-1.23841	0.0974684	0.82003
CELL ACTIVATION INVOLVED IN IMMUNE RESPONSE GOBP GO:0002263	378	-0.532263	-1.23833	0.0495049	0.819252
CELLULAR RESPONSE TO CATECHOLAMINE STIMULUS GOBP GO:0071870	16	-0.755476	-1.23801	0.208197	0.819757
G-PROTEIN ACTIVATION REACTOME R-HSA-202040.1	18	-0.736112	-1.23744	0.191693	0.821641
BICELLULAR TIGHT JUNCTION ASSEMBLY GOBP GO:0070830	22	-0.7279	-1.23725	0.199693	0.821375
STEROL HOMEOSTASIS GOBP GO:0055092	42	-0.657861	-1.23721	0.170029	0.820259
PROTEASOME DEGRADATION WIKIPATHWAYS_20191210 WP183 HOMO SAPIENS	52	-0.646442	-1.23658	0.132353	0.822416
NEGATIVE REGULATION OF CELLULAR RESPONSE TO GROWTH FACTOR STIMULUS GOBP GO:0090288	86	-0.596395	-1.23655	0.129032	0.821283
HEXOSE CATABOLIC PROCESS GOBP GO:0019320	40	-0.663207	-1.2364	0.180704	0.820781
OXIDATIVE PHOSPHORYLATION WIKIPATHWAYS_20191210 WP623 HOMO SAPIENS	48	-0.636857	-1.23635	0.16087	0.819769
INTRACELLULAR PH REDUCTION GOBP GO:0051452	35	-0.669392	-1.23621	0.176024	0.819349
POSITIVE REGULATION OF WNT SIGNALING PATHWAY GOBP GO:0030177	135	-0.568334	-1.23566	0.108479	0.821081
PID_INTEGRIN_A9B1_PATHWAY MSIGDB_C2 PID_INTEGRIN_A9B1_PATHWAY	21	-0.711678	-1.23527	0.20347	0.822007
DITERPENOID METABOLIC PROCESS GOBP GO:0016101	39	-0.657456	-1.23481	0.175	0.823177
HYPERTROPHY MODEL WIKIPATHWAYS_20191210 WP516 HOMO SAPIENS	16	-0.743376	-1.23455	0.202341	0.823268
HEART VALVE MORPHOGENESIS GOBP GO:0003179	38	-0.657403	-1.23426	0.181818	0.823642
MITOCHONDRIAL ELECTRON TRANSPORT, NADH TO UBIQUINONE GOBP GO:0006120	38	-0.657555	-1.2338	0.181818	0.824856
BBSOME-MEDIATED CARGO-TARGETING TO CILIUM REACTOME DATABASE ID RELEASE 71 5620922	22	-0.696712	-1.23344	0.198738	0.82561
CELL SURFACE RECEPTOR SIGNALING PATHWAY INVOLVED IN CELL-CELL SIGNALING GOBP GO:1905114	177	-0.559537	-1.23339	0.0880893	0.824604
ASPARTATE FAMILY AMINO ACID BIOSYNTHETIC PROCESS GOBP GO:0009067	16	-0.74549	-1.23301	0.2064	0.825366
SENESCENCE-ASSOCIATED SECRETORY PHENOTYPE (SASP) REACTOME R-HSA-2559582.2	52	-0.638122	-1.23281	0.159292	0.825144
RIBONUCLEOTIDE METABOLIC PROCESS GOBP GO:0009259	280	-0.542009	-1.23251	0.0603645	0.825428
CHAPERONE MEDIATED AUTOPHAGY REACTOME DATABASE ID RELEASE 71 9613829	17	-0.745489	-1.23224	0.195046	0.825653
RUNX1 INTERACTS WITH CO-FACTORS WHOSE PRECISE EFFECT ON RUNX1 TARGETS IS NOT KNOWN REACTOME R-HSA-8939243.1	33	-0.677549	-1.23223	0.179104	0.824459
MAP3K8 (TPL2)-DEPENDENT MAPK1 3 ACTIVATION REACTOME DATABASE ID RELEASE 71 5684264	15	-0.764566	-1.23199	0.2	0.824485
REGULATION OF PLATELET ACTIVATION GOBP GO:0010543	17	-0.732218	-1.23192	0.233387	0.823658
RESPONSE TO OTHER ORGANISM GOBP GO:0051707	274	-0.531901	-1.23138	0.0732558	0.82528
CANONICAL WNT SIGNALING PATHWAY PATHWAY INTERACTION DATABASE NCI-NATURE CURATED DATA CANONICAL WNT SIGNALING PATHWAY	18	-0.728316	-1.23121	0.225539	0.824901
POSITIVE REGULATION OF PROTEOLYSIS INVOLVED IN CELLULAR PROTEIN CATABOLIC PROCESS GOBP GO:1903052	87	-0.594122	-1.23068	0.141361	0.826624
OVULATION CYCLE GOBP GO:0042698	16	-0.752822	-1.23039	0.202552	0.826946
REGULATION OF INTRINSIC APOPTOTIC SIGNALING PATHWAY IN RESPONSE TO DNA DAMAGE GOBP GO:1902229	30	-0.684289	-1.23025	0.184685	0.826492
RESPONSE TO MONOAMINE GOBP GO:0071867	16	-0.755476	-1.22971	0.198997	0.828093
ACTIVATED NOTCH1 TRANSMITS SIGNAL TO THE NUCLEUS REACTOME DATABASE ID RELEASE 71 2122948	25	-0.695926	-1.22935	0.1952	0.828756
PID_MTOR_4PATHWAY MSIGDB_C2 PID_MTOR_4PATHWAY	64	-0.616091	-1.22933	0.142857	0.827691
CHAPERONIN-MEDIATED PROTEIN FOLDING REACTOME DATABASE ID RELEASE 71 390466	72	-0.601324	-1.22915	0.137228	0.82745
CARBOHYDRATE METABOLIC PROCESS GOBP GO:0005975	216	-0.549251	-1.22883	0.0895171	0.827882
SPINDLE CHECKPOINT GOBP GO:0031577	19	-0.722117	-1.22816	0.213166	0.830265
MITOTIC SPINDLE ASSEMBLY CHECKPOINT GOBP GO:0007094	19	-0.722117	-1.22786	0.20934	0.830668
RNA POLYMERASE III TRANSCRIPTION TERMINATION REACTOME DATABASE ID RELEASE 71 73980	22	-0.705057	-1.22754	0.2	0.831214
IRON UPTAKE AND TRANSPORT REACTOME DATABASE ID RELEASE 71 917937	48	-0.643746	-1.22689	0.169516	0.833509
NUCLEIC ACID PHOSPHODIESTER BOND HYDROLYSIS GOBP GO:0090305	128	-0.5682	-1.22641	0.108586	0.834893
ALPHA-AMINO ACID CATABOLIC PROCESS GOBP GO:1901606	52	-0.641546	-1.22639	0.163636	0.833776
HALLMARK_OXIDATIVE_PHOSPHORYLATION MSIGDB_C2 HALLMARK_OXIDATIVE_PHOSPHORYLATION	196	-0.548446	-1.22607	0.0818505	0.834225
SIGNALING BY INSULIN RECEPTOR REACTOME R-HSA-74752.1	54	-0.628936	-1.2259	0.163585	0.833888
RESPONSE TO LIPOPROTEIN PARTICLE GOBP GO:0055094	15	-0.73694	-1.22576	0.217172	0.833369
RENAL SYSTEM PROCESS GOBP GO:0003014	52	-0.629551	-1.22534	0.166201	0.834394
MUSCLE TISSUE DEVELOPMENT GOBP GO:0060537	95	-0.587046	-1.22491	0.141497	0.835445
DOWNSTREAM SIGNAL TRANSDUCTION REACTOME R-HSA-186763.2	23	-0.696216	-1.22438	0.214744	0.837085
PID_WNT_CANONICAL_PATHWAY MSIGDB_C2 PID_WNT_CANONICAL_PATHWAY	18	-0.728316	-1.22359	0.20742	0.840023
PTERIDINE-CONTAINING COMPOUND METABOLIC PROCESS GOBP GO:0042558	20	-0.709985	-1.22352	0.205207	0.839143
CELL-CELL SIGNALING BY WNT GOBP GO:0198738	167	-0.555569	-1.22332	0.121394	0.838997
INTRINSIC APOPTOTIC SIGNALING PATHWAY GOBP GO:0097193	96	-0.579614	-1.22329	0.140212	0.837903
T CELL ACTIVATION INVOLVED IN IMMUNE RESPONSE GOBP GO:0002286	16	-0.747927	-1.22313	0.230519	0.837536
CELLULAR RESPONSE TO EXTRACELLULAR STIMULUS GOBP GO:0031668	128	-0.574585	-1.22297	0.129074	0.837185
POSITIVE REGULATION OF REPRODUCTIVE PROCESS GOBP GO:2000243	23	-0.698392	-1.22275	0.220395	0.837106
ALPHA9 BETA1 INTEGRIN SIGNALING EVENTS PATHWAY INTERACTION DATABASE NCI-NATURE CURATED DATA ALPHA9 BETA1 INTEGRIN SIGNALING EVENTS	21	-0.711677	-1.2227	0.215909	0.836189
POSITIVE REGULATION OF LEUKOCYTE PROLIFERATION GOBP GO:0070665	51	-0.629414	-1.22252	0.178003	0.835961
MITOCHONDRIAL RESPIRATORY CHAIN COMPLEX I ASSEMBLY GOBP GO:0032981	56	-0.616222	-1.22249	0.165689	0.834909
OXIDATION BY CYTOCHROME P450 WIKIPATHWAYS_20191210 WP43 HOMO SAPIENS	20	-0.724128	-1.22165	0.225908	0.838217
PLASMA LIPOPROTEIN CLEARANCE REACTOME R-HSA-8964043.1	22	-0.702711	-1.22143	0.223438	0.838046
MONOCARBOXYLIC ACID BIOSYNTHETIC PROCESS GOBP GO:0072330	114	-0.572154	-1.22143	0.149215	0.836858
RESPONSE TO EXTERNAL BIOTIC STIMULUS GOBP GO:0043207	274	-0.531901	-1.22142	0.0769231	0.835686
ANTIGEN PROCESSING AND PRESENTATION OF PEPTIDE ANTIGEN GOBP GO:0048002	145	-0.556866	-1.22108	0.121728	0.836326
INTRACELLULAR SIGNALING BY SECOND MESSENGERS REACTOME R-HSA-9006925.3	243	-0.537337	-1.22106	0.0899533	0.835254
RESPONSE TO CAMP GOBP GO:0051591	27	-0.693134	-1.22101	0.208655	0.83429
G2 M CHECKPOINTS REACTOME R-HSA-69481.3	131	-0.569016	-1.22085	0.126963	0.833953
PROTEIN MATURATION GOBP GO:0051604	142	-0.561868	-1.22057	0.10285	0.834304
DRUG METABOLIC PROCESS GOBP GO:0017144	375	-0.522673	-1.22	0.0573951	0.836178
MITOCHONDRIAL TRANSMEMBRANE TRANSPORT GOBP GO:1990542	87	-0.590398	-1.21981	0.163102	0.836043
NCRNA PROCESSING GOBP GO:0034470	299	-0.531024	-1.2196	0.0891429	0.835932
CARDIOCYTE DIFFERENTIATION GOBP GO:0035051	45	-0.636414	-1.21742	0.183526	0.846262
GENE AND PROTEIN EXPRESSION BY JAK-STAT SIGNALING AFTER INTERLEUKIN-12 STIMULATION REACTOME R-HSA-8950505.3	31	-0.673258	-1.21736	0.203498	0.845388
ECM PROTEOGLYCANS REACTOME R-HSA-3000178.3	38	-0.642544	-1.21711	0.210762	0.845536
SULFUR COMPOUND METABOLIC PROCESS GOBP GO:0006790	240	-0.536521	-1.2167	0.094007	0.846407
STRIATED MUSCLE CELL DIFFERENTIATION GOBP GO:0051146	65	-0.605596	-1.21503	0.169972	0.854158
HALLMARK_GLYCOLYSIS MSIGDB_C2 HALLMARK_GLYCOLYSIS	170	-0.54267	-1.21498	0.11432	0.853244
WNT SIGNALING PATHWAY GOBP GO:0016055	165	-0.556284	-1.21493	0.130061	0.852279
AQUAPORIN-MEDIATED TRANSPORT REACTOME R-HSA-445717.2	30	-0.672606	-1.21428	0.190259	0.854581
OPIOID SIGNALLING REACTOME R-HSA-111885.1	67	-0.610772	-1.21405	0.159441	0.854655
MUSCARINIC ACETYLCHOLINE RECEPTOR 2 AND 4 SIGNALING PATHWAY PANTHER PATHWAY P00043	34	-0.660482	-1.21388	0.232092	0.854441
VIRAL LIFE CYCLE GOBP GO:0019058	114	-0.561604	-1.21375	0.139442	0.853948
REGULATION OF ANOIKIS GOBP GO:2000209	18	-0.705605	-1.21354	0.238019	0.853937
LEUKOCYTE ACTIVATION INVOLVED IN IMMUNE RESPONSE GOBP GO:0002366	374	-0.521672	-1.21328	0.0660173	0.854051
PURINE-CONTAINING COMPOUND CATABOLIC PROCESS GOBP GO:0072523	28	-0.675704	-1.21289	0.223089	0.854943
MITOTIC SPINDLE CHECKPOINT GOBP GO:0071174	19	-0.722117	-1.21288	0.228013	0.853796
NADH DEHYDROGENASE COMPLEX ASSEMBLY GOBP GO:0010257	56	-0.616222	-1.21255	0.180142	0.854374
EUKARYOTIC TRANSCRIPTION INITIATION WIKIPATHWAYS_20191210 WP405 HOMO SAPIENS	41	-0.639199	-1.21249	0.175182	0.853495
REGULATION OF BONE RESORPTION GOBP GO:0045124	16	-0.733359	-1.21216	0.277129	0.854101
AMINO SUGAR METABOLIC PROCESS GOBP GO:0006040	28	-0.679455	-1.21213	0.191824	0.853073
POSITIVE REGULATION OF CELLULAR PROTEIN CATABOLIC PROCESS GOBP GO:1903364	103	-0.5801	-1.21199	0.157543	0.852658
PI3K AKT SIGNALING REACTOME R-HSA-1257604.8	214	-0.542187	-1.21191	0.11071	0.851951
ASPARTATE FAMILY AMINO ACID CATABOLIC PROCESS GOBP GO:0009068	16	-0.729827	-1.21184	0.241491	0.851154
MITOTIC ANAPHASE REACTOME DATABASE ID RELEASE 71 68882	171	-0.54787	-1.21176	0.121606	0.850405
OPIOID PROENKEPHALIN PATHWAY PANTHER PATHWAY P05915	22	-0.696009	-1.2117	0.2	0.849572
VASOPRESSIN REGULATES RENAL WATER HOMEOSTASIS VIA AQUAPORINS REACTOME DATABASE ID RELEASE 71 432040	28	-0.685568	-1.21165	0.223856	0.848675
POSITIVE REGULATION OF RNA SPLICING GOBP GO:0033120	25	-0.682414	-1.21135	0.200637	0.84907
COMPLEX I BIOGENESIS REACTOME R-HSA-6799198.1	48	-0.627988	-1.21083	0.189706	0.850652
OSTEOPONTIN-MEDIATED EVENTS PATHWAY INTERACTION DATABASE NCI-NATURE CURATED DATA OSTEOPONTIN-MEDIATED EVENTS	28	-0.681384	-1.21038	0.207547	0.85181
MTORC1-MEDIATED SIGNALLING REACTOME R-HSA-166208.2	22	-0.698153	-1.20988	0.242138	0.853361
RESPONSE TO BIOTIC STIMULUS GOBP GO:0009607	290	-0.530616	-1.20986	0.097254	0.852366
ACETYL-COA METABOLIC PROCESS GOBP GO:0006084	16	-0.731769	-1.20965	0.2411	0.852236
RIBOSE PHOSPHATE METABOLIC PROCESS GOBP GO:0019693	297	-0.525926	-1.20957	0.0878613	0.851477
NEGATIVE REGULATION OF RESPONSE TO DNA DAMAGE STIMULUS GOBP GO:2001021	69	-0.603262	-1.20952	0.164051	0.850624
DISEASES OF METABOLISM REACTOME R-HSA-5668914.1	73	-0.599777	-1.2092	0.179806	0.851122
DISORDERS OF TRANSMEMBRANE TRANSPORTERS REACTOME DATABASE ID RELEASE 71 5619115	123	-0.564518	-1.20917	0.160414	0.850126
POSITIVE REGULATION OF TUMOR NECROSIS FACTOR PRODUCTION GOBP GO:0032760	36	-0.659504	-1.20915	0.182229	0.849088
SIGNALING BY TGF-BETA FAMILY MEMBERS REACTOME DATABASE ID RELEASE 71 9006936	93	-0.584611	-1.2088	0.136	0.849796
RESPONSE TO COLD GOBP GO:0009409	17	-0.731079	-1.20736	0.236066	0.856147
ST_GAQ_PATHWAY MSIGDB_C2 ST_GAQ_PATHWAY	26	-0.677924	-1.2068	0.206573	0.857898
TOLL-LIKE RECEPTOR CASCADES REACTOME R-HSA-168898.6	126	-0.561787	-1.20663	0.145223	0.857635
POSITIVE REGULATION OF PROTEASOMAL UBIQUITIN-DEPENDENT PROTEIN CATABOLIC PROCESS GOBP GO:0032436	61	-0.616744	-1.20652	0.194915	0.857102
SPINDLE ASSEMBLY CHECKPOINT GOBP GO:0071173	19	-0.722117	-1.20603	0.2192	0.8585
ACTOMYOSIN STRUCTURE ORGANIZATION GOBP GO:0031032	68	-0.593138	-1.20569	0.172662	0.859176
IRON-SULFUR CLUSTER ASSEMBLY GOBP GO:0016226	20	-0.703023	-1.20564	0.237942	0.858266
HEDGEHOG SIGNALING EVENTS MEDIATED BY GLI PROTEINS PATHWAY INTERACTION DATABASE NCI-NATURE CURATED DATA HEDGEHOG SIGNALING EVENTS MEDIATED BY GLI PROTEINS	45	-0.637915	-1.20559	0.190337	0.857442
RESPONSE TO OXYGEN LEVELS GOBP GO:0070482	184	-0.536267	-1.20525	0.118644	0.858076
BIOCARTA_IGF1MTOR_PATHWAY MSIGDB_C2 BIOCARTA_IGF1MTOR_PATHWAY	19	-0.704794	-1.20509	0.228125	0.857778
CIRCULATORY SYSTEM DEVELOPMENT GOBP GO:0072359	347	-0.51689	-1.20504	0.0745273	0.856888
ASPARAGINE N-LINKED GLYCOSYLATION REACTOME R-HSA-446203.4	248	-0.529133	-1.20483	0.10817	0.856834
MITOTIC METAPHASE AND ANAPHASE REACTOME DATABASE ID RELEASE 71 2555396	172	-0.54481	-1.20473	0.133172	0.856193
ENDOGENOUS TLR SIGNALING PATHWAY INTERACTION DATABASE NCI-NATURE CURATED DATA ENDOGENOUS TLR SIGNALING	19	-0.714741	-1.20413	0.242947	0.85813
REGULATION OF POLYSACCHARIDE METABOLIC PROCESS GOBP GO:0032881	26	-0.692947	-1.20372	0.203338	0.859159
METABOTROPIC GLUTAMATE RECEPTOR GROUP II PATHWAY PANTHER PATHWAY P00040	30	-0.668973	-1.2034	0.214286	0.85963
MYELOID CELL HOMEOSTASIS GOBP GO:0002262	36	-0.652841	-1.20334	0.212922	0.8588
RETINOID METABOLIC PROCESS GOBP GO:0001523	37	-0.649196	-1.20323	0.215543	0.858234
ACTIVATION OF MAPK ACTIVITY GOBP GO:0000187	88	-0.57778	-1.20319	0.161423	0.857298
CHOLESTEROL TRANSPORT GOBP GO:0030301	30	-0.664758	-1.20311	0.219619	0.856599
TRANSPORT OF VIRUS GOBP GO:0046794	48	-0.623421	-1.20294	0.186289	0.856352
CELLULAR COMPONENT ASSEMBLY INVOLVED IN MORPHOGENESIS GOBP GO:0010927	40	-0.634814	-1.20274	0.209801	0.856178
PID_TOLL_ENDOGENOUS_PATHWAY MSIGDB_C2 PID_TOLL_ENDOGENOUS_PATHWAY	19	-0.714741	-1.20256	0.232143	0.855963
NEGATIVE REGULATION OF METAPHASE/ANAPHASE TRANSITION OF CELL CYCLE GOBP GO:1902100	20	-0.689662	-1.20253	0.228435	0.855006
INTERLEUKIN-12 SIGNALING REACTOME R-HSA-9020591.1	38	-0.637708	-1.2024	0.204687	0.854527
NEGATIVE REGULATION OF MAPK PATHWAY REACTOME R-HSA-5675221.2	37	-0.653768	-1.20169	0.223228	0.857021
UNTITLED PANTHER PATHWAY P05916	22	-0.696009	-1.20168	0.244444	0.85593
REGULATION OF NUCLEASE ACTIVITY GOBP GO:0032069	16	-0.733329	-1.2012	0.2443	0.857319
REGULATION OF INTERLEUKIN-2 PRODUCTION GOBP GO:0032663	23	-0.692629	-1.20104	0.254808	0.857047
METALLOPROTEASE DUBS REACTOME R-HSA-5689901.2	18	-0.724163	-1.20092	0.216306	0.856535
SYNTHESIS OF SUBSTRATES IN N-GLYCAN BIOSYTHESIS REACTOME R-HSA-446219.2	52	-0.614509	-1.20022	0.212121	0.858984
ROS AND RNS PRODUCTION IN PHAGOCYTES REACTOME DATABASE ID RELEASE 71 1222556	23	-0.699838	-1.20021	0.254045	0.857972
CELLULAR MODIFIED AMINO ACID METABOLIC PROCESS GOBP GO:0006575	105	-0.568503	-1.20017	0.170895	0.857088
NEGATIVE REGULATION OF PROGRAMMED CELL DEATH GOBP GO:0043069	454	-0.50731	-1.20011	0.0715835	0.856291
CIRCADIAN RHYTHM RELATED GENES WIKIPATHWAYS_20191210 WP3594 HOMO SAPIENS	140	-0.544006	-1.19887	0.17024	0.86141
HEART VALVE DEVELOPMENT GOBP GO:0003170	43	-0.643044	-1.19887	0.208889	0.860302
REGULATION OF INTERLEUKIN-12 PRODUCTION GOBP GO:0032655	26	-0.669446	-1.19796	0.254211	0.86377
GLYCOLYSIS I HUMANCYC GLYCOLYSIS	17	-0.717359	-1.1978	0.249201	0.863439
SEPARATION OF SISTER CHROMATIDS REACTOME DATABASE ID RELEASE 71 2467813	163	-0.546073	-1.19658	0.127295	0.86858
PROTEIN K63-LINKED UBIQUITINATION GOBP GO:0070534	36	-0.653157	-1.19642	0.204412	0.868293
NEGATIVE REGULATION OF APOPTOTIC PROCESS GOBP GO:0043066	441	-0.509624	-1.19619	0.0705755	0.868363
REGULATION OF RESPONSE TO DNA DAMAGE STIMULUS GOBP GO:2001020	183	-0.542258	-1.196	0.146312	0.868165
CELLULAR RESPONSE TO CAMP GOBP GO:0071320	19	-0.702563	-1.19575	0.243789	0.868435
FGF SIGNALING PATHWAY PATHWAY INTERACTION DATABASE NCI-NATURE CURATED DATA FGF SIGNALING PATHWAY	40	-0.636176	-1.19564	0.219653	0.867877
PROTEIN PEPTIDYL-PROLYL ISOMERIZATION GOBP GO:0000413	19	-0.713182	-1.19511	0.25832	0.869532
NEUROMUSCULAR PROCESS GOBP GO:0050905	18	-0.716776	-1.19506	0.255285	0.868668
RNA-DEPENDENT DNA BIOSYNTHETIC PROCESS GOBP GO:0006278	22	-0.694999	-1.19488	0.248819	0.868432
HEART DEVELOPMENT GOBP GO:0007507	207	-0.539786	-1.1942	0.129917	0.870824
METALLO-SULFUR CLUSTER ASSEMBLY GOBP GO:0031163	20	-0.703023	-1.19298	0.249597	0.876049
INTERLEUKIN-12 FAMILY SIGNALING REACTOME R-HSA-447115.5	45	-0.625429	-1.1927	0.20121	0.876393
REGULATION OF NUCLEAR SMAD2 3 SIGNALING PATHWAY INTERACTION DATABASE NCI-NATURE CURATED DATA REGULATION OF NUCLEAR SMAD2 3 SIGNALING	71	-0.584846	-1.19264	0.21519	0.875582
MEMBRANE LIPID METABOLIC PROCESS GOBP GO:0006643	139	-0.552042	-1.19234	0.167305	0.875983
MACROAUTOPHAGY GOBP GO:0016236	135	-0.551858	-1.192	0.164659	0.876569
GLUCONEOGENESIS I HUMANCYC GLUCONEO-PWY	16	-0.726372	-1.19191	0.255086	0.875915
ASPARTATE FAMILY AMINO ACID METABOLIC PROCESS GOBP GO:0009066	37	-0.649369	-1.19152	0.242857	0.876915
CARBOHYDRATE DERIVATIVE CATABOLIC PROCESS GOBP GO:1901136	116	-0.555252	-1.1914	0.162516	0.876388
PID_AVB3_OPN_PATHWAY MSIGDB_C2 PID_AVB3_OPN_PATHWAY	28	-0.681384	-1.19122	0.198185	0.876202
THROMBOXANE SIGNALLING THROUGH TP RECEPTOR REACTOME R-HSA-428930.1	17	-0.717806	-1.19071	0.247492	0.877746
NOD1 2 SIGNALING PATHWAY REACTOME R-HSA-168638.1	28	-0.671205	-1.18976	0.244992	0.881449
METHIONINE METABOLIC PROCESS GOBP GO:0006555	15	-0.739102	-1.1893	0.246281	0.882635
REGULATION OF CALCIUM ION TRANSMEMBRANE TRANSPORTER ACTIVITY GOBP GO:1901019	42	-0.625009	-1.18857	0.209268	0.885165
PID_SMAD2_3NUCLEAR_PATHWAY MSIGDB_C2 PID_SMAD2_3NUCLEAR_PATHWAY	71	-0.584846	-1.18833	0.187761	0.885327
ONCOGENIC MAPK SIGNALING REACTOME R-HSA-6802957.4	59	-0.601509	-1.18811	0.205882	0.88531
NEUTROPHIL DEGRANULATION GOBP GO:0043312	332	-0.506965	-1.18795	0.0858124	0.88503
POSITIVE REGULATION OF MONONUCLEAR CELL PROLIFERATION GOBP GO:0032946	48	-0.609095	-1.18794	0.222063	0.883982
INNATE IMMUNE RESPONSE-ACTIVATING SIGNAL TRANSDUCTION GOBP GO:0002758	157	-0.54001	-1.18714	0.149367	0.886922
PROTEIN LOCALIZATION REACTOME R-HSA-9609507.2	140	-0.552945	-1.18698	0.166452	0.886626
GLUTATHIONE CONJUGATION REACTOME R-HSA-156590.2	22	-0.697545	-1.18646	0.256735	0.888106
PHOSPHOLIPID CATABOLIC PROCESS GOBP GO:0009395	17	-0.706657	-1.18636	0.254317	0.887551
MULTI-ORGANISM TRANSPORT GOBP GO:0044766	56	-0.605451	-1.18627	0.210084	0.886919
CELLULAR RESPONSE TO LIPOPROTEIN PARTICLE STIMULUS GOBP GO:0071402	16	-0.720201	-1.18582	0.289644	0.888173
PROTEIN HYDROXYLATION GOBP GO:0018126	22	-0.689885	-1.18572	0.260656	0.887564
HISTAMINE H2 RECEPTOR MEDIATED SIGNALING PATHWAY PANTHER PATHWAY P04386	16	-0.712299	-1.1855	0.265924	0.88756
HALLMARK_MTORC1_SIGNALING MSIGDB_C2 HALLMARK_MTORC1_SIGNALING	191	-0.532864	-1.18471	0.144893	0.890441
RESPONSE TO GROWTH HORMONE GOBP GO:0060416	15	-0.720101	-1.18458	0.275974	0.890023
ANTIBIOTIC METABOLIC PROCESS GOBP GO:0016999	66	-0.588919	-1.18409	0.204703	0.891346
PROTEOGLYCAN METABOLIC PROCESS GOBP GO:0006029	55	-0.596063	-1.18379	0.211568	0.891804
STRIATED MUSCLE TISSUE DEVELOPMENT GOBP GO:0014706	84	-0.583077	-1.18372	0.190278	0.891074
FIBROBLAST GROWTH FACTOR RECEPTOR SIGNALING PATHWAY GOBP GO:0008543	58	-0.598498	-1.18361	0.195335	0.890603
INTRACELLULAR RECEPTOR SIGNALING PATHWAY GOBP GO:0030522	102	-0.563141	-1.1835	0.201058	0.890081
GLYCOLIPID BIOSYNTHETIC PROCESS GOBP GO:0009247	49	-0.611768	-1.18332	0.230882	0.889864
STEROL TRANSPORT GOBP GO:0015918	31	-0.664516	-1.18331	0.261941	0.888848
EPHRIN B REVERSE SIGNALING PATHWAY INTERACTION DATABASE NCI-NATURE CURATED DATA EPHRIN B REVERSE SIGNALING	20	-0.689069	-1.18277	0.250799	0.890552
INTERLEUKIN-12-MEDIATED SIGNALING PATHWAY GOBP GO:0035722	38	-0.637876	-1.18271	0.241176	0.889733
POSITIVE REGULATION OF TUMOR NECROSIS FACTOR SUPERFAMILY CYTOKINE PRODUCTION GOBP GO:1903557	37	-0.646131	-1.18265	0.236417	0.889002
SELENIUM MICRONUTRIENT NETWORK WIKIPATHWAYS_20191210 WP15 HOMO SAPIENS	48	-0.615537	-1.18252	0.233184	0.888562
CELLULAR CARBOHYDRATE METABOLIC PROCESS GOBP GO:0044262	84	-0.573786	-1.18202	0.206989	0.890034
LEUKOCYTE DEGRANULATION GOBP GO:0043299	338	-0.504001	-1.18198	0.0998865	0.889151
REGULATION OF CENTROSOME CYCLE GOBP GO:0046605	46	-0.61725	-1.18148	0.228916	0.890678
PURINE-CONTAINING COMPOUND METABOLIC PROCESS GOBP GO:0072521	309	-0.510968	-1.18124	0.117514	0.890813
POST-TRANSLATIONAL MODIFICATION: SYNTHESIS OF GPI-ANCHORED PROTEINS REACTOME R-HSA-163125.2	48	-0.620533	-1.18102	0.225352	0.890835
PURINE NUCLEOSIDE METABOLIC PROCESS GOBP GO:0042278	36	-0.637364	-1.18088	0.232628	0.8905
REGULATION OF TRANSFORMING GROWTH FACTOR BETA PRODUCTION GOBP GO:0071634	18	-0.691981	-1.18086	0.25525	0.889515
CELLULAR CARBOHYDRATE BIOSYNTHETIC PROCESS GOBP GO:0034637	34	-0.631985	-1.18052	0.259912	0.890181
NEGATIVE REGULATION OF CELL CYCLE PHASE TRANSITION GOBP GO:1901988	189	-0.528643	-1.18018	0.147965	0.890814
HALLMARK_ANDROGEN_RESPONSE MSIGDB_C2 HALLMARK_ANDROGEN_RESPONSE	86	-0.570338	-1.17967	0.213528	0.892312
NEUTROPHIL ACTIVATION INVOLVED IN IMMUNE RESPONSE GOBP GO:0002283	333	-0.506728	-1.1792	0.102564	0.893593
ACTIN-MEDIATED CELL CONTRACTION GOBP GO:0070252	44	-0.621421	-1.17868	0.230329	0.895176
POSITIVE REGULATION OF MUSCLE CELL DIFFERENTIATION GOBP GO:0051149	41	-0.619129	-1.17855	0.239826	0.894739
HUMAN COMPLEMENT SYSTEM WIKIPATHWAYS_20191210 WP2806 HOMO SAPIENS	53	-0.597452	-1.17823	0.222384	0.895312
REGULATION OF GLIAL CELL DIFFERENTIATION GOBP GO:0045685	26	-0.669524	-1.17777	0.265432	0.896511
TSLP NETPATH TSLP	142	-0.545497	-1.17762	0.197484	0.896204
PID_PDGFRB_PATHWAY MSIGDB_C2 PID_PDGFRB_PATHWAY	116	-0.55307	-1.17754	0.185235	0.895529
5HT4 TYPE RECEPTOR MEDIATED SIGNALING PATHWAY PANTHER PATHWAY P04376	20	-0.688165	-1.17747	0.281099	0.894799
SIGNALING BY ERBB2 REACTOME DATABASE ID RELEASE 71 1227986	37	-0.636907	-1.17737	0.241018	0.894238
NEGATIVE REGULATION OF MITOTIC SISTER CHROMATID SEGREGATION GOBP GO:0033048	24	-0.667471	-1.17666	0.275478	0.896681
LDL CLEARANCE REACTOME DATABASE ID RELEASE 71 8964038	15	-0.711752	-1.17662	0.282095	0.895807
RIBONUCLEOSIDE METABOLIC PROCESS GOBP GO:0009119	41	-0.623845	-1.17651	0.225225	0.895327
CELL CYCLE WIKIPATHWAYS_20191210 WP179 HOMO SAPIENS	115	-0.548037	-1.17626	0.185087	0.895499
POSITIVE REGULATION OF INTERLEUKIN-12 PRODUCTION GOBP GO:0032735	18	-0.701753	-1.17624	0.281399	0.894559
NEGATIVE REGULATION OF MITOTIC METAPHASE/ANAPHASE TRANSITION GOBP GO:0045841	20	-0.689662	-1.17554	0.272142	0.897043
HALLMARK_SPERMATOGENESIS MSIGDB_C2 HALLMARK_SPERMATOGENESIS	75	-0.575498	-1.17542	0.211949	0.89663
CILIUM-DEPENDENT CELL MOTILITY GOBP GO:0060285	16	-0.706457	-1.17526	0.275478	0.896405
SULFUR COMPOUND BIOSYNTHETIC PROCESS GOBP GO:0044272	125	-0.550544	-1.17506	0.205845	0.896297
REGULATION OF VASCULAR ENDOTHELIAL GROWTH FACTOR RECEPTOR SIGNALING PATHWAY GOBP GO:0030947	20	-0.698779	-1.17496	0.275244	0.895735
MULTICELLULAR ORGANISMAL REPRODUCTIVE PROCESS GOBP GO:0048609	172	-0.534189	-1.17495	0.153563	0.894736
MITOCHONDRIAL COMPLEX I ASSEMBLY MODEL OXPHOS SYSTEM WIKIPATHWAYS_20191210 WP4324 HOMO SAPIENS	48	-0.60691	-1.17471	0.229769	0.894901
APOPTOTIC CLEAVAGE OF CELLULAR PROTEINS REACTOME R-HSA-111465.3	26	-0.661257	-1.1747	0.259259	0.893928
RESPONSE TO NUTRIENT LEVELS GOBP GO:0031667	167	-0.530028	-1.17448	0.167679	0.89398
GLYCOLYSIS PANTHER PATHWAY P00024	16	-0.711143	-1.17438	0.292994	0.893412
PROTEIN TARGETING TO MITOCHONDRION GOBP GO:0006626	51	-0.612381	-1.17411	0.245442	0.893768
NUCLEOBASE-CONTAINING SMALL MOLECULE CATABOLIC PROCESS GOBP GO:0034656	28	-0.654367	-1.17401	0.261868	0.893178
MYELOID CELL ACTIVATION INVOLVED IN IMMUNE RESPONSE GOBP GO:0002275	341	-0.507165	-1.17384	0.119912	0.893016
MULTI-ORGANISM LOCALIZATION GOBP GO:1902579	56	-0.605451	-1.17383	0.226442	0.892001
REGULATION OF BICELLULAR TIGHT JUNCTION ASSEMBLY GOBP GO:2000810	15	-0.708657	-1.17363	0.278333	0.891988
PID_EPHRINB_REV_PATHWAY MSIGDB_C2 PID_EPHRINB_REV_PATHWAY	20	-0.689069	-1.17361	0.271104	0.891081
CELLULAR RESPONSE TO INTERLEUKIN-12 GOBP GO:0071349	40	-0.631327	-1.17338	0.221893	0.891163
HEDGEHOG IOB HEDGEHOG	34	-0.642834	-1.17328	0.25625	0.890606
APOPTOTIC SIGNALING PATHWAY GOBP GO:0097190	178	-0.534897	-1.17328	0.164466	0.889611
PROTEIN FOLDING REACTOME R-HSA-391251.1	78	-0.578704	-1.17315	0.201351	0.889205
POSITIVE REGULATION OF LYMPHOCYTE PROLIFERATION GOBP GO:0050671	47	-0.609772	-1.17301	0.223565	0.888955
MULTICELLULAR ORGANISM REPRODUCTION GOBP GO:0032504	174	-0.532515	-1.17278	0.167482	0.889039
REGULATION OF MAST CELL DEGRANULATION GOBP GO:0043304	15	-0.713018	-1.17265	0.304498	0.888679
OPIOID PROOPIOMELANOCORTIN PATHWAY PANTHER PATHWAY P05917	23	-0.675359	-1.17236	0.2624	0.889036
HEDGEHOG NETPATH HEDGEHOG	34	-0.642834	-1.17212	0.262009	0.88913
NEUTROPHIL MEDIATED IMMUNITY GOBP GO:0002446	337	-0.506148	-1.17152	0.13	0.890961
RESPONSE TO INTERLEUKIN-12 GOBP GO:0070671	40	-0.631327	-1.17107	0.257396	0.892091
EPO IOB EPO	43	-0.623382	-1.17095	0.238532	0.891618
KINESINS REACTOME R-HSA-983189.3	36	-0.636121	-1.17033	0.258876	0.893675
SIGNALING DOWNSTREAM OF RAS MUTANTS REACTOME R-HSA-9649948.1	33	-0.63554	-1.17007	0.254786	0.893861
PYRUVATE BIOSYNTHETIC PROCESS GOBP GO:0042866	30	-0.643955	-1.16967	0.268882	0.89482
NEGATIVE REGULATION OF CHROMOSOME SEGREGATION GOBP GO:0051985	25	-0.664946	-1.16953	0.270642	0.894479
TRANS-SULFURATION AND ONE CARBON METABOLISM WIKIPATHWAYS_20191210 WP2525 HOMO SAPIENS	26	-0.652575	-1.16891	0.268182	0.896479
GLUCAGON-LIKE PEPTIDE-1 (GLP1) REGULATES INSULIN SECRETION REACTOME DATABASE ID RELEASE 71 381676	30	-0.646249	-1.16858	0.245312	0.897043
ORGANOPHOSPHATE CATABOLIC PROCESS GOBP GO:0046434	101	-0.556137	-1.16808	0.198932	0.898374
RHO GTPASES ACTIVATE CIT REACTOME DATABASE ID RELEASE 71 5625900	18	-0.698973	-1.16802	0.265501	0.897684
REGULATION OF MAST CELL ACTIVATION INVOLVED IN IMMUNE RESPONSE GOBP GO:0033006	15	-0.713018	-1.16762	0.307443	0.898686
PURINE RIBONUCLEOSIDE METABOLIC PROCESS GOBP GO:0046128	34	-0.639091	-1.16613	0.258015	0.904761
REGULATION OF FIBROBLAST MIGRATION GOBP GO:0010762	19	-0.677669	-1.16587	0.268921	0.905027
CLASS I PEROXISOMAL MEMBRANE PROTEIN IMPORT REACTOME DATABASE ID RELEASE 71 9603798	18	-0.681115	-1.16585	0.288462	0.904126
ADP SIGNALLING THROUGH P2Y PURINOCEPTOR 1 REACTOME DATABASE ID RELEASE 71 418592	18	-0.701287	-1.16519	0.299841	0.906312
BETA3 ADRENERGIC RECEPTOR SIGNALING PATHWAY PANTHER PATHWAY P04379	20	-0.688165	-1.16493	0.268608	0.90652
NEGATIVE REGULATION OF SISTER CHROMATID SEGREGATION GOBP GO:0033046	25	-0.664946	-1.16443	0.268608	0.907952
CARBOXYTERMINAL POST-TRANSLATIONAL MODIFICATIONS OF TUBULIN REACTOME DATABASE ID RELEASE 71 8955332	21	-0.68189	-1.16398	0.273163	0.909146
BINDING AND UPTAKE OF LIGANDS BY SCAVENGER RECEPTORS REACTOME DATABASE ID RELEASE 71 2173782	21	-0.670943	-1.16396	0.289515	0.90823
ESTABLISHMENT OF MITOTIC SPINDLE ORIENTATION GOBP GO:0000132	24	-0.658309	-1.16389	0.301092	0.907568
NEGATIVE REGULATION OF CATION CHANNEL ACTIVITY GOBP GO:2001258	17	-0.692318	-1.16383	0.298851	0.906816
CARBOHYDRATE DERIVATIVE TRANSPORT GOBP GO:1901264	35	-0.627662	-1.16375	0.238311	0.906218
HEART PROCESS GOBP GO:0003015	45	-0.600435	-1.16307	0.255132	0.908462
POLYSACCHARIDE BIOSYNTHETIC PROCESS GOBP GO:0000271	28	-0.648277	-1.16289	0.249624	0.908357
REGULATION OF MACROAUTOPHAGY GOBP GO:0016241	141	-0.531576	-1.16288	0.179949	0.907386
FAT CELL DIFFERENTIATION GOBP GO:0045444	46	-0.618276	-1.16283	0.255072	0.906618
POSITIVE REGULATION OF ORGANELLE ASSEMBLY GOBP GO:1902117	51	-0.599326	-1.16277	0.22734	0.905944
NEUTROPHIL DEGRANULATION REACTOME R-HSA-6798695.2	327	-0.502814	-1.16267	0.143177	0.90539
TOLL-LIKE RECEPTOR SIGNALING RELATED TO MYD88 WIKIPATHWAYS_20191210 WP3858 HOMO SAPIENS	25	-0.656207	-1.16235	0.270736	0.905971
PROTON TRANSMEMBRANE TRANSPORT GOBP GO:1902600	34	-0.635799	-1.16227	0.271186	0.905368
TRIVALENT INORGANIC CATION TRANSPORT GOBP GO:0072512	30	-0.646953	-1.16211	0.278034	0.905133
PURINE NUCLEOTIDE METABOLIC PROCESS GOBP GO:0006163	290	-0.507155	-1.16187	0.145665	0.905305
SIGNALING BY MODERATE KINASE ACTIVITY BRAF MUTANTS REACTOME DATABASE ID RELEASE 71 6802946	33	-0.63554	-1.16144	0.251149	0.906412
NEGATIVE CHEMOTAXIS GOBP GO:0050919	23	-0.651179	-1.16141	0.314845	0.905554
SIGNALING BY RAS MUTANTS REACTOME DATABASE ID RELEASE 71 6802949	33	-0.63554	-1.1609	0.264209	0.906937
FERRIC IRON TRANSPORT GOBP GO:0015682	30	-0.646953	-1.16088	0.280303	0.906026
OXIDATION-REDUCTION PROCESS GOBP GO:0055114	321	-0.50586	-1.16081	0.155756	0.905379
REGULATION OF GLYCOPROTEIN METABOLIC PROCESS GOBP GO:1903018	27	-0.650669	-1.16065	0.284418	0.905205
INTEGRIN-MEDIATED SIGNALING PATHWAY GOBP GO:0007229	54	-0.600159	-1.16064	0.237389	0.904268
GRANULOCYTE ACTIVATION GOBP GO:0036230	338	-0.499373	-1.16061	0.140642	0.903398
MYELOID LEUKOCYTE MEDIATED IMMUNITY GOBP GO:0002444	343	-0.501486	-1.16014	0.133257	0.904686
7-METHYLGUANOSINE RNA CAPPING GOBP GO:0009452	32	-0.64074	-1.16002	0.277946	0.904302
ALPHA-AMINO ACID METABOLIC PROCESS GOBP GO:1901605	123	-0.53883	-1.15946	0.206851	0.905826
POSITIVE REGULATION OF MUSCLE HYPERTROPHY GOBP GO:0014742	16	-0.706549	-1.15842	0.28594	0.9099
TOLL-LIKE RECEPTOR SIGNALING PATHWAY WIKIPATHWAYS_20191210 WP75 HOMO SAPIENS	67	-0.583821	-1.15822	0.23338	0.909864
CELLULAR POLYSACCHARIDE BIOSYNTHETIC PROCESS GOBP GO:0033692	28	-0.648277	-1.15802	0.272	0.909866
PARADOXICAL ACTIVATION OF RAF SIGNALING BY KINASE INACTIVE BRAF REACTOME R-HSA-6802955.1	33	-0.63554	-1.15783	0.267884	0.909781
ORGANIC HYDROXY COMPOUND METABOLIC PROCESS GOBP GO:1901615	201	-0.511166	-1.15782	0.188902	0.908817
ACTIVATION OF PROTEIN KINASE ACTIVITY GOBP GO:0032147	200	-0.520953	-1.15782	0.184116	0.907854
RNA POL II CTD PHOSPHORYLATION AND INTERACTION WITH CE REACTOME R-HSA-77075.2	27	-0.648377	-1.15766	0.264567	0.907611
TRANSFERRIN ENDOCYTOSIS AND RECYCLING REACTOME R-HSA-917977.1	25	-0.667819	-1.15765	0.275862	0.906652
SIGNALING BY WNT REACTOME R-HSA-195721.5	227	-0.511901	-1.15746	0.172043	0.906576
NEUTROPHIL ACTIVATION GOBP GO:0042119	337	-0.499582	-1.15672	0.142697	0.909265
REGULATION OF NUCLEOTIDE BIOSYNTHETIC PROCESS GOBP GO:0030808	75	-0.555282	-1.1563	0.232462	0.91032
ORGANELLE MEMBRANE FUSION GOBP GO:0090174	64	-0.575794	-1.15621	0.241935	0.909756
BETA2 ADRENERGIC RECEPTOR SIGNALING PATHWAY PANTHER PATHWAY P04378	17	-0.689207	-1.15521	0.279435	0.913529
POSITIVE REGULATION OF PROTEOLYSIS GOBP GO:0045862	226	-0.510672	-1.15514	0.166667	0.91287
MYELOID LEUKOCYTE ACTIVATION GOBP GO:0002274	361	-0.493106	-1.15511	0.134956	0.912021
POSITIVE REGULATION OF CANONICAL WNT SIGNALING PATHWAY GOBP GO:0090263	111	-0.538953	-1.15486	0.210663	0.912219
7-METHYLGUANOSINE MRNA CAPPING GOBP GO:0006370	32	-0.64074	-1.15362	0.269289	0.917106
CELLULAR RESPONSE TO GROWTH FACTOR STIMULUS GOBP GO:0071363	273	-0.5026	-1.1536	0.156977	0.916232
MULTI-MULTICELLULAR ORGANISM PROCESS GOBP GO:0044706	26	-0.663199	-1.15339	0.286614	0.916272
FACTORS AND PATHWAYS AFFECTING INSULIN-LIKE GROWTH FACTOR (IGF1)-AKT SIGNALING WIKIPATHWAYS_20191210 WP3850 HOMO SAPIENS	27	-0.663068	-1.15288	0.298003	0.917754
POSITIVE REGULATION OF LIPID TRANSPORT GOBP GO:0032370	29	-0.634459	-1.15269	0.277946	0.917626
MRNA CAPPING REACTOME DATABASE ID RELEASE 71 72086	29	-0.641339	-1.15267	0.285047	0.916747
POSITIVE REGULATION OF CARDIAC MUSCLE HYPERTROPHY GOBP GO:0010613	16	-0.706549	-1.15214	0.306154	0.918272
RNA SPLICING, VIA ENDONUCLEOLYTIC CLEAVAGE AND LIGATION GOBP GO:0000394	15	-0.704175	-1.15133	0.317512	0.921184
TYROBP CAUSAL NETWORK WIKIPATHWAYS_20191210 WP3945 HOMO SAPIENS	39	-0.618406	-1.15113	0.279649	0.921201
ANGIOTENSIN_II-STIMULATED_SIGNALING_THROUGH_G_PROTEINS_AND_BETA-ARRESTIN PANTHER PATHWAY P05911	29	-0.640955	-1.15104	0.290323	0.920656
CELLULAR POLYSACCHARIDE METABOLIC PROCESS GOBP GO:0044264	40	-0.61131	-1.151	0.282235	0.919893
CILIUM OR FLAGELLUM-DEPENDENT CELL MOTILITY GOBP GO:0001539	16	-0.706457	-1.15078	0.305112	0.919994
NEGATIVE REGULATION OF CHROMOSOME SEPARATION GOBP GO:1905819	21	-0.668384	-1.14919	0.305031	0.926447
REGULATION OF PTEN GENE TRANSCRIPTION REACTOME DATABASE ID RELEASE 71 8943724	56	-0.586245	-1.14909	0.269727	0.925973
DOWNREGULATION OF ERBB2 SIGNALING REACTOME DATABASE ID RELEASE 71 8863795	20	-0.675185	-1.149	0.322476	0.925402
MTOR SIGNALLING REACTOME R-HSA-165159.5	38	-0.60804	-1.14852	0.280832	0.926823
HALLMARK_APICAL_SURFACE MSIGDB_C2 HALLMARK_APICAL_SURFACE	34	-0.628709	-1.14833	0.270016	0.92681
MUSCARINIC ACETYLCHOLINE RECEPTOR 1 AND 3 SIGNALING PATHWAY PANTHER PATHWAY P00042	35	-0.618264	-1.14829	0.282738	0.926011
GTP METABOLIC PROCESS GOBP GO:0046039	18	-0.679206	-1.14795	0.310966	0.926524
SIG_PIP3_SIGNALING_IN_B_LYMPHOCYTES MSIGDB_C2 SIG_PIP3_SIGNALING_IN_B_LYMPHOCYTES	27	-0.638907	-1.14746	0.286872	0.927921
CELLULAR RESPONSE TO FIBROBLAST GROWTH FACTOR STIMULUS GOBP GO:0044344	68	-0.56462	-1.14709	0.23934	0.928772
POLYSACCHARIDE METABOLIC PROCESS GOBP GO:0005976	41	-0.611237	-1.14665	0.260805	0.929795
MIRNA REGULATION OF PROSTATE CANCER SIGNALING PATHWAYS WIKIPATHWAYS_20191210 WP3981 HOMO SAPIENS	32	-0.629014	-1.14571	0.273669	0.933294
REGULATION OF GLYCOPROTEIN BIOSYNTHETIC PROCESS GOBP GO:0010559	24	-0.655815	-1.14538	0.314376	0.933811
POLYOL METABOLIC PROCESS GOBP GO:0019751	70	-0.568499	-1.14538	0.263085	0.932848
IMMUNE RESPONSE-ACTIVATING SIGNAL TRANSDUCTION GOBP GO:0002757	258	-0.504712	-1.14513	0.176608	0.933032
CLASS I MHC MEDIATED ANTIGEN PROCESSING & PRESENTATION REACTOME R-HSA-983169.3	313	-0.497426	-1.14414	0.160894	0.936721
LIPID BIOSYNTHETIC PROCESS GOBP GO:0008610	363	-0.491831	-1.14406	0.145055	0.936139
VESICLE FUSION GOBP GO:0006906	59	-0.580873	-1.14381	0.28771	0.936324
RESPONSE TO DECREASED OXYGEN LEVELS GOBP GO:0036293	173	-0.515323	-1.14376	0.209639	0.935575
IRS-RELATED EVENTS TRIGGERED BY IGF1R REACTOME DATABASE ID RELEASE 71 2428928	31	-0.62533	-1.14367	0.312121	0.935068
ESTABLISHMENT OF SPINDLE ORIENTATION GOBP GO:0051294	28	-0.640851	-1.1435	0.314286	0.93489
LEUKOCYTE HOMEOSTASIS GOBP GO:0001776	19	-0.682212	-1.14346	0.327586	0.934119
LYSOSOME VESICLE BIOGENESIS REACTOME R-HSA-432720.2	31	-0.639651	-1.14343	0.280303	0.933278
FOLIC ACID-CONTAINING COMPOUND METABOLIC PROCESS GOBP GO:0006760	17	-0.69029	-1.14334	0.327948	0.932732
PDGFR-BETA SIGNALING PATHWAY PATHWAY INTERACTION DATABASE NCI-NATURE CURATED DATA PDGFR-BETA SIGNALING PATHWAY	113	-0.535108	-1.14313	0.229551	0.932716
FC-EPSILON RECEPTOR SIGNALING PATHWAY GOBP GO:0038095	94	-0.546746	-1.14301	0.252336	0.9323
STIMULATORY C-TYPE LECTIN RECEPTOR SIGNALING PATHWAY GOBP GO:0002223	81	-0.555289	-1.1423	0.241096	0.93465
HEART CONTRACTION GOBP GO:0060047	38	-0.623206	-1.14224	0.293605	0.933942
POSTREPLICATION REPAIR GOBP GO:0006301	48	-0.591053	-1.14195	0.280576	0.934395
IMMUNE RESPONSE-REGULATING SIGNALING PATHWAY GOBP GO:0002764	277	-0.496213	-1.14119	0.171233	0.937047
RESPONSE TO GROWTH FACTOR GOBP GO:0070848	287	-0.499519	-1.14104	0.175084	0.936749
REGULATION OF MUSCLE HYPERTROPHY GOBP GO:0014743	26	-0.640048	-1.14073	0.293478	0.93729
VITAMIN TRANSPORT GOBP GO:0051180	18	-0.680499	-1.14024	0.321821	0.938589
ANTIMICROBIAL HUMORAL RESPONSE GOBP GO:0019730	19	-0.674028	-1.1397	0.330671	0.940114
SA_CASPASE_CASCADE MSIGDB_C2 SA_CASPASE_CASCADE	15	-0.689777	-1.13919	0.329966	0.941598
INNATE IMMUNE RESPONSE ACTIVATING CELL SURFACE RECEPTOR SIGNALING PATHWAY GOBP GO:0002220	81	-0.555289	-1.13898	0.256793	0.941596
IL-1 SIGNALING PATHWAY WIKIPATHWAYS_20191210 WP195 HOMO SAPIENS	51	-0.592773	-1.13863	0.273894	0.942307
NEGATIVE REGULATION OF MITOTIC SISTER CHROMATID SEPARATION GOBP GO:2000816	21	-0.668384	-1.13849	0.312402	0.942
RESPONSE TO OSMOTIC STRESS GOBP GO:0006970	27	-0.647161	-1.13841	0.311321	0.94142
SIGNALING BY TYPE 1 INSULIN-LIKE GROWTH FACTOR 1 RECEPTOR (IGF1R) REACTOME R-HSA-2404192.2	31	-0.62533	-1.13826	0.301775	0.941147
PROCESSING OF DNA DOUBLE-STRAND BREAK ENDS REACTOME R-HSA-5693607.1	63	-0.573706	-1.1378	0.253147	0.942315
VASCULAR ENDOTHELIAL GROWTH FACTOR RECEPTOR SIGNALING PATHWAY GOBP GO:0048010	56	-0.575524	-1.1378	0.26513	0.941366
RNA POL II CTD PHOSPHORYLATION AND INTERACTION WITH CE DURING HIV INFECTION REACTOME R-HSA-167160.2	27	-0.648377	-1.13767	0.335394	0.941065
ATP BIOSYNTHETIC PROCESS GOBP GO:0006754	51	-0.588612	-1.13766	0.269615	0.9402
ESTABLISHMENT OF PROTEIN LOCALIZATION TO MITOCHONDRION GOBP GO:0072655	63	-0.565594	-1.1375	0.266207	0.93998
REGULATION OF MYELINATION GOBP GO:0031641	18	-0.674759	-1.13725	0.333863	0.940164
ANTIGEN PROCESSING AND PRESENTATION OF EXOGENOUS PEPTIDE ANTIGEN GOBP GO:0002478	136	-0.52177	-1.13665	0.23192	0.942038
VESICLE TRANSPORT ALONG MICROTUBULE GOBP GO:0047496	34	-0.614524	-1.13634	0.276471	0.94256
CELLULAR PROCESS INVOLVED IN REPRODUCTION IN MULTICELLULAR ORGANISM GOBP GO:0022412	87	-0.552315	-1.1362	0.245924	0.942299
POSITIVE REGULATION OF TELOMERE CAPPING GOBP GO:1904355	15	-0.689222	-1.13585	0.3229	0.943028
FOLIC ACID METABOLIC PROCESS GOBP GO:0046655	15	-0.689212	-1.13581	0.329527	0.942251
HYALURONAN METABOLISM REACTOME R-HSA-2142845.1	15	-0.703203	-1.13561	0.319933	0.942217
MITOCHONDRIAL GENOME MAINTENANCE GOBP GO:0000002	20	-0.666929	-1.13505	0.331783	0.94383
DISEASES OF SIGNAL TRANSDUCTION REACTOME R-HSA-5663202.5	306	-0.496895	-1.13481	0.178971	0.943996
REGULATION OF PURINE NUCLEOTIDE BIOSYNTHETIC PROCESS GOBP GO:1900371	75	-0.555282	-1.13473	0.25447	0.943423
MUSCLE CELL DIFFERENTIATION GOBP GO:0042692	86	-0.552928	-1.13435	0.258503	0.944193
PEROXISOME ORGANIZATION GOBP GO:0007031	63	-0.567309	-1.13431	0.286127	0.943383
RESPONSE TO HYPOXIA GOBP GO:0001666	170	-0.520143	-1.13292	0.228643	0.948805
RNA POLYMERASE II TRANSCRIPTION TERMINATION REACTOME R-HSA-73856.4	64	-0.56791	-1.13265	0.258064	0.949134
HOST INTERACTIONS OF HIV FACTORS REACTOME R-HSA-162909.1	112	-0.532966	-1.1325	0.259758	0.948907
CARBOHYDRATE BIOSYNTHETIC PROCESS GOBP GO:0016051	73	-0.552881	-1.13194	0.265193	0.950614
G-PROTEIN MEDIATED EVENTS REACTOME DATABASE ID RELEASE 71 112040	39	-0.60494	-1.13179	0.306213	0.950368
DAP12 INTERACTIONS REACTOME DATABASE ID RELEASE 71 2172127	16	-0.666601	-1.13166	0.317684	0.950027
ARRHYTHMOGENIC RIGHT VENTRICULAR CARDIOMYOPATHY WIKIPATHWAYS_20191210 WP2118 HOMO SAPIENS	53	-0.572746	-1.13162	0.289436	0.949246
POLO-LIKE KINASE MEDIATED EVENTS REACTOME DATABASE ID RELEASE 71 156711	16	-0.679371	-1.13128	0.316212	0.949935
RNA CAPPING GOBP GO:0036260	33	-0.629599	-1.13014	0.323529	0.954168
PEROXISOMAL TRANSPORT GOBP GO:0043574	55	-0.576538	-1.12996	0.279476	0.954031
BETA1 ADRENERGIC RECEPTOR SIGNALING PATHWAY PANTHER PATHWAY P04377	24	-0.643396	-1.12965	0.318797	0.954498
GOLGI VESICLE BUDDING GOBP GO:0048194	70	-0.5558	-1.12958	0.283073	0.953869
PURINE NUCLEOSIDE TRIPHOSPHATE BIOSYNTHETIC PROCESS GOBP GO:0009145	53	-0.579983	-1.12921	0.270538	0.954591
LEUKOCYTE MEDIATED IMMUNITY GOBP GO:0002443	366	-0.482371	-1.12906	0.183832	0.954387
ALLOGRAFT REJECTION WIKIPATHWAYS_20191210 WP2328 HOMO SAPIENS	31	-0.626233	-1.12812	0.314417	0.957866
CARBOHYDRATE METABOLISM REACTOME R-HSA-71387.9	225	-0.503583	-1.12807	0.205742	0.957159
POSITIVE REGULATION OF VIRAL GENOME REPLICATION GOBP GO:0045070	27	-0.625814	-1.12771	0.323077	0.957891
TRANSCRIPTION OF E2F TARGETS UNDER NEGATIVE CONTROL BY P107 (RBL1) AND P130 (RBL2) IN COMPLEX WITH HDAC1 REACTOME DATABASE ID RELEASE 71 1362300	16	-0.676262	-1.12745	0.350163	0.958194
REGULATION OF NEURON DEATH GOBP GO:1901214	122	-0.528796	-1.12632	0.2607	0.962555
REGULATION OF CELLULAR RESPONSE TO HEAT GOBP GO:1900034	67	-0.566736	-1.12614	0.275524	0.962461
DISEASES OF GLYCOSYLATION REACTOME DATABASE ID RELEASE 71 3781865	114	-0.531602	-1.12602	0.282472	0.962068
LEUKOCYTE ACTIVATION GOBP GO:0045321	481	-0.476375	-1.12521	0.168649	0.964914
RESPONSE TO OXIDATIVE STRESS GOBP GO:0006979	197	-0.506704	-1.12509	0.22864	0.964517
REGULATION OF CARDIAC MUSCLE CELL ACTION POTENTIAL GOBP GO:0098901	23	-0.638781	-1.12474	0.319218	0.96523
PROTEIN LOCALIZATION TO MITOCHONDRION GOBP GO:0070585	66	-0.564477	-1.12471	0.287572	0.964438
PATHOGENIC ESCHERICHIA COLI INFECTION WIKIPATHWAYS_20191210 WP2272 HOMO SAPIENS	36	-0.601661	-1.12458	0.319213	0.964111
APICAL JUNCTION ASSEMBLY GOBP GO:0043297	29	-0.633439	-1.12442	0.321101	0.963897
ACTIN FILAMENT-BASED PROCESS GOBP GO:0030029	374	-0.479264	-1.1243	0.190848	0.963516
PROTEIN TARGETING TO PEROXISOME GOBP GO:0006625	54	-0.57658	-1.12409	0.297668	0.963561
METAPATHWAY BIOTRANSFORMATION PHASE I AND II WIKIPATHWAYS_20191210 WP702 HOMO SAPIENS	71	-0.55949	-1.12371	0.275072	0.964296
MUSCLE ORGAN DEVELOPMENT GOBP GO:0007517	93	-0.537384	-1.12326	0.270696	0.965342
REGULATION OF TELOMERE CAPPING GOBP GO:1904353	23	-0.652334	-1.12311	0.336434	0.965101
AMYLOID-BETA CLEARANCE GOBP GO:0097242	17	-0.672295	-1.12299	0.338658	0.964728
IGF1R SIGNALING CASCADE REACTOME DATABASE ID RELEASE 71 2428924	31	-0.62533	-1.12281	0.338028	0.964632
REGULATION OF HSF1-MEDIATED HEAT SHOCK RESPONSE REACTOME R-HSA-3371453.1	58	-0.567693	-1.12276	0.284682	0.963949
RIBONUCLEOSIDE TRIPHOSPHATE BIOSYNTHETIC PROCESS GOBP GO:0009201	56	-0.572706	-1.12253	0.291317	0.964043
SIGNALING BY NOTCH1 REACTOME R-HSA-1980143.2	60	-0.565867	-1.12251	0.294891	0.963184
REGULATION OF LIPID TRANSPORT GOBP GO:0032368	50	-0.582371	-1.12213	0.29927	0.963982
PROTEIN LOCALIZATION TO PEROXISOME GOBP GO:0072662	54	-0.57658	-1.12199	0.297602	0.963692
ACTIN CYTOSKELETON ORGANIZATION GOBP GO:0030036	331	-0.485592	-1.12188	0.199557	0.963267
PI3K CASCADE REACTOME R-HSA-109704.5	26	-0.632766	-1.12128	0.328358	0.964983
REGULATION OF CELL CYCLE G2/M PHASE TRANSITION GOBP GO:1902749	181	-0.507818	-1.12127	0.245215	0.964113
WNT IOB WNT	96	-0.536276	-1.12119	0.286676	0.963554
RENAL WATER HOMEOSTASIS GOBP GO:0003091	19	-0.661338	-1.12114	0.355593	0.962872
REGULATION OF INTRINSIC APOPTOTIC SIGNALING PATHWAY BY P53 CLASS MEDIATOR GOBP GO:1902253	18	-0.665178	-1.12093	0.340391	0.962922
RECEPTOR CATABOLIC PROCESS GOBP GO:0032801	21	-0.656338	-1.12088	0.323855	0.962215
RESPONSE TO FIBROBLAST GROWTH FACTOR GOBP GO:0071774	70	-0.556322	-1.12079	0.288674	0.961689
ATP SYNTHESIS COUPLED PROTON TRANSPORT GOBP GO:0015986	19	-0.654648	-1.1206	0.350794	0.961644
INSULIN IGF PATHWAY-PROTEIN KINASE B SIGNALING CASCADE PANTHER PATHWAY P00033	18	-0.668665	-1.12057	0.327559	0.960895
RNA EXPORT FROM NUCLEUS GOBP GO:0006405	113	-0.527263	-1.12052	0.260536	0.960221
SPHINGOLIPID BIOSYNTHETIC PROCESS GOBP GO:0030148	58	-0.566328	-1.12022	0.287591	0.960668
PULMONARY VALVE DEVELOPMENT GOBP GO:0003177	15	-0.686318	-1.12006	0.338843	0.960421
REGULATION OF MUSCLE ADAPTATION GOBP GO:0043502	33	-0.613111	-1.11977	0.319938	0.960822
REGULATION OF VIRAL GENOME REPLICATION GOBP GO:0045069	58	-0.573723	-1.11944	0.288824	0.961426
ANTIGEN PROCESSING AND PRESENTATION OF EXOGENOUS ANTIGEN GOBP GO:0019884	136	-0.52177	-1.11923	0.250627	0.961457
NEGATIVE REGULATION OF INTRINSIC APOPTOTIC SIGNALING PATHWAY BY P53 CLASS MEDIATOR GOBP GO:1902254	15	-0.685523	-1.11889	0.367047	0.962143
SUBSTRATE ADHESION-DEPENDENT CELL SPREADING GOBP GO:0034446	34	-0.605106	-1.11839	0.335286	0.963489
COPII-COATED VESICLE BUDDING GOBP GO:0090114	64	-0.562916	-1.11837	0.310145	0.962683
SPLICEOSOMAL SNRNP ASSEMBLY GOBP GO:0000387	37	-0.599937	-1.11833	0.312689	0.961908
MEMBRANE FUSION GOBP GO:0061025	92	-0.530354	-1.11804	0.277997	0.962289
PATTERN RECOGNITION RECEPTOR SIGNALING PATHWAY GOBP GO:0002221	86	-0.537501	-1.11786	0.292617	0.962175
NEGATIVE REGULATION OF DNA METABOLIC PROCESS GOBP GO:0051053	107	-0.529712	-1.11775	0.286472	0.961764
LOW-DENSITY LIPOPROTEIN PARTICLE CLEARANCE GOBP GO:0034383	18	-0.668207	-1.11773	0.349606	0.96093
GLUCONEOGENESIS REACTOME R-HSA-70263.2	24	-0.640908	-1.11715	0.342229	0.962654
LATE ENDOSOME TO VACUOLE TRANSPORT GOBP GO:0045324	16	-0.670302	-1.11657	0.357259	0.964376
PURINE RIBONUCLEOSIDE TRIPHOSPHATE BIOSYNTHETIC PROCESS GOBP GO:0009206	53	-0.579983	-1.11644	0.290456	0.964071
POSITIVE REGULATION OF UBIQUITIN-DEPENDENT PROTEIN CATABOLIC PROCESS GOBP GO:2000060	70	-0.549894	-1.11637	0.303694	0.96348
CASPASE ACTIVATION VIA EXTRINSIC APOPTOTIC SIGNALLING PATHWAY REACTOME DATABASE ID RELEASE 71 5357769	19	-0.662232	-1.11606	0.354409	0.963918
CELL VOLUME HOMEOSTASIS GOBP GO:0006884	17	-0.66518	-1.11585	0.337442	0.964002
NUCLEAR ENVELOPE REASSEMBLY GOBP GO:0031468	18	-0.658845	-1.11574	0.340357	0.963607
REGULATION OF VASCULAR SMOOTH MUSCLE CELL PROLIFERATION GOBP GO:1904705	30	-0.618838	-1.11557	0.322379	0.963457
CORTOCOTROPIN RELEASING FACTOR RECEPTOR SIGNALING PATHWAY PANTHER PATHWAY P04380	22	-0.655562	-1.11539	0.357595	0.96331
ENERGY COUPLED PROTON TRANSPORT, DOWN ELECTROCHEMICAL GRADIENT GOBP GO:0015985	19	-0.654648	-1.11521	0.357827	0.963256
ESTABLISHMENT OF PROTEIN LOCALIZATION TO PEROXISOME GOBP GO:0072663	54	-0.57658	-1.115	0.300719	0.963274
RUNX1 REGULATES TRANSCRIPTION OF GENES INVOLVED IN DIFFERENTIATION OF HSCS REACTOME R-HSA-8939236.1	67	-0.564859	-1.11494	0.310773	0.962641
METABOTROPIC GLUTAMATE RECEPTOR GROUP III PATHWAY PANTHER PATHWAY P00039	38	-0.596276	-1.11494	0.320552	0.961785
PHOTODYNAMIC THERAPY-INDUCED UNFOLDED PROTEIN RESPONSE WIKIPATHWAYS_20191210 WP3613 HOMO SAPIENS	25	-0.649683	-1.11487	0.332795	0.961188
UPTAKE AND ACTIONS OF BACTERIAL TOXINS REACTOME R-HSA-5339562.2	21	-0.649624	-1.11476	0.34984	0.960786
RESPONSE TO PROGESTERONE GOBP GO:0032570	15	-0.674386	-1.11471	0.349259	0.960092
REGULATION OF TISSUE REMODELING GOBP GO:0034103	32	-0.61005	-1.11446	0.33581	0.960277
PYRUVATE METABOLISM AND CITRIC ACID (TCA) CYCLE REACTOME R-HSA-71406.1	48	-0.576737	-1.11444	0.304284	0.959501
NEGATIVE REGULATION OF CELLULAR RESPONSE TO TRANSFORMING GROWTH FACTOR BETA STIMULUS GOBP GO:1903845	45	-0.57678	-1.11378	0.323708	0.961544
EXECUTION PHASE OF APOPTOSIS GOBP GO:0097194	33	-0.606792	-1.11355	0.331871	0.961629
RESPONSE TO EXTRACELLULAR STIMULUS GOBP GO:0009991	176	-0.500911	-1.11354	0.263354	0.960801
POSITIVE REGULATION OF T CELL PROLIFERATION GOBP GO:0042102	31	-0.611792	-1.11344	0.346327	0.960387
CELLULAR RESPONSE TO UV GOBP GO:0034644	64	-0.550335	-1.11343	0.296348	0.959546
SULFUR AMINO ACID METABOLISM REACTOME DATABASE ID RELEASE 71 1614635	23	-0.63181	-1.11329	0.351145	0.959279
ACTIVATION OF GTPASE ACTIVITY GOBP GO:0090630	64	-0.555886	-1.11314	0.332867	0.959025
NUCLEOBASE BIOSYNTHESIS REACTOME DATABASE ID RELEASE 71 8956320	15	-0.679034	-1.11297	0.345763	0.958829
WNT NETPATH WNT	97	-0.53409	-1.11292	0.296247	0.958187
CHOLESTEROL BIOSYNTHETIC PROCESS GOBP GO:0006695	27	-0.618307	-1.11185	0.354489	0.962037
RIBONUCLEOPROTEIN COMPLEX LOCALIZATION GOBP GO:0071166	110	-0.51636	-1.11138	0.261498	0.96324
PHOSPHATIDYLINOSITOL BIOSYNTHETIC PROCESS GOBP GO:0006661	94	-0.52922	-1.11105	0.304974	0.963758
PEROXISOMAL PROTEIN IMPORT REACTOME DATABASE ID RELEASE 71 9033241	47	-0.579645	-1.11017	0.31268	0.966855
POST-TRANSLATIONAL PROTEIN MODIFICATION GOBP GO:0043687	282	-0.487407	-1.1101	0.220705	0.966255
REGULATION OF MACROPHAGE ACTIVATION GOBP GO:0043030	26	-0.622273	-1.11002	0.328594	0.965708
NUCLEOSIDE PHOSPHATE CATABOLIC PROCESS GOBP GO:1901292	73	-0.552107	-1.10918	0.288488	0.968613
REGULATION OF CARDIAC MUSCLE HYPERTROPHY GOBP GO:0010611	26	-0.640048	-1.10911	0.351767	0.968072
INFLAMMATORY RESPONSE GOBP GO:0006954	122	-0.517923	-1.10859	0.293214	0.969449
REGULATION OF CHEMOKINE PRODUCTION GOBP GO:0032642	33	-0.609037	-1.10855	0.356725	0.968745
NUCLEOCYTOPLASMIC TRANSPORT GOBP GO:0006913	192	-0.500326	-1.10799	0.260274	0.970383
REGULATION OF GLUCOSE METABOLIC PROCESS GOBP GO:0010906	56	-0.572443	-1.10796	0.307365	0.969638
CELLULAR HORMONE METABOLIC PROCESS GOBP GO:0034754	31	-0.605326	-1.10787	0.341693	0.969156
DNA BIOSYNTHETIC PROCESS GOBP GO:0071897	67	-0.551225	-1.10784	0.318841	0.968422
IMPORT INTO NUCLEUS GOBP GO:0051170	75	-0.550952	-1.10736	0.309878	0.969666
SECONDARY ALCOHOL BIOSYNTHETIC PROCESS GOBP GO:1902653	28	-0.613897	-1.10716	0.342988	0.969693
VIRAL ENTRY INTO HOST CELL GOBP GO:0046718	19	-0.660322	-1.10707	0.354037	0.969206
GENOTOXICITY PATHWAY WIKIPATHWAYS_20191210 WP4286 HOMO SAPIENS	51	-0.570074	-1.10687	0.327273	0.969179
COENZYME BIOSYNTHETIC PROCESS GOBP GO:0009108	126	-0.511811	-1.10638	0.288608	0.970388
NUCLEOTIDE CATABOLIC PROCESS GOBP GO:0009166	70	-0.552649	-1.1059	0.293128	0.97162
IRS-MEDIATED SIGNALLING REACTOME DATABASE ID RELEASE 71 112399	29	-0.625375	-1.10558	0.357567	0.972118
REGULATION OF PLASMA LIPOPROTEIN PARTICLE LEVELS GOBP GO:0097006	40	-0.594454	-1.10505	0.346847	0.973625
TCA CYCLE AND DEFICIENCY OF PYRUVATE DEHYDROGENASE COMPLEX (PDHC) WIKIPATHWAYS_20191210 WP2453 HOMO SAPIENS	15	-0.677257	-1.1048	0.366129	0.973857
HALLMARK_FATTY_ACID_METABOLISM MSIGDB_C2 HALLMARK_FATTY_ACID_METABOLISM	126	-0.51097	-1.10477	0.269181	0.97309
MICROTUBULE ORGANIZING CENTER LOCALIZATION GOBP GO:0061842	18	-0.658072	-1.10457	0.381342	0.973108
SIGNALING BY EGFR IN CANCER REACTOME R-HSA-1643713.1	18	-0.653283	-1.1044	0.34984	0.972992
POSITIVE REGULATION OF ENDOPEPTIDASE ACTIVITY GOBP GO:0010950	103	-0.527964	-1.10393	0.307292	0.974116
ATP GENERATION FROM ADP GOBP GO:0006757	29	-0.609365	-1.10344	0.36019	0.975404
ORGANIC ACID BIOSYNTHETIC PROCESS GOBP GO:0016053	183	-0.495891	-1.10342	0.263288	0.974633
LAMELLIPODIUM ASSEMBLY GOBP GO:0030032	20	-0.647447	-1.10339	0.379808	0.973893
PURINE RIBONUCLEOTIDE CATABOLIC PROCESS GOBP GO:0009154	17	-0.66288	-1.10337	0.357367	0.973126
CYCLIC-NUCLEOTIDE-MEDIATED SIGNALING GOBP GO:0019935	70	-0.553349	-1.10309	0.32097	0.973564
TRANSLATIONAL TERMINATION GOBP GO:0006415	93	-0.530313	-1.10289	0.305108	0.973493
TOLL RECEPTOR SIGNALING PATHWAY PANTHER PATHWAY P00054	37	-0.592818	-1.10271	0.343108	0.973427
PID_ILK_PATHWAY MSIGDB_C2 PID_ILK_PATHWAY	43	-0.567783	-1.10262	0.330396	0.972935
NEGATIVE REGULATION OF COLD-INDUCED THERMOGENESIS GOBP GO:0120163	39	-0.581446	-1.10255	0.321101	0.972348
OVERVIEW OF LEUKOCYTE-INTRINSIC HIPPO PATHWAY FUNCTIONS WIKIPATHWAYS_20191210 WP4542 HOMO SAPIENS	31	-0.619308	-1.10241	0.354199	0.972083
CONSTITUTIVE SIGNALING BY LIGAND-RESPONSIVE EGFR CANCER VARIANTS REACTOME DATABASE ID RELEASE 71 1236382	15	-0.679701	-1.1024	0.374172	0.971274
MITOCHONDRION DISASSEMBLY GOBP GO:0061726	33	-0.607475	-1.10237	0.352584	0.970578
CELL DEATH SIGNALLING VIA NRAGE, NRIF AND NADE REACTOME R-HSA-204998.1	62	-0.561735	-1.10221	0.33526	0.970429
CENTROSOME LOCALIZATION GOBP GO:0051642	18	-0.658072	-1.10206	0.39629	0.970214
SIGNALING BY LIGAND-RESPONSIVE EGFR VARIANTS IN CANCER REACTOME DATABASE ID RELEASE 71 5637815	15	-0.679701	-1.10169	0.383117	0.970959
TCF DEPENDENT SIGNALING IN RESPONSE TO WNT REACTOME DATABASE ID RELEASE 71 201681	152	-0.502451	-1.1016	0.27551	0.970422
RHYTHMIC PROCESS GOBP GO:0048511	98	-0.52748	-1.1014	0.30291	0.970444
RESPONSE TO REACTIVE OXYGEN SPECIES GOBP GO:0000302	88	-0.532953	-1.10137	0.320323	0.969693
NEGATIVE REGULATION OF INTRINSIC APOPTOTIC SIGNALING PATHWAY GOBP GO:2001243	67	-0.547984	-1.1012	0.305899	0.969575
CELL-CELL COMMUNICATION REACTOME DATABASE ID RELEASE 71 1500931	81	-0.534128	-1.09964	0.313514	0.975428
HDR THROUGH HOMOLOGOUS RECOMBINATION (HRR) OR SINGLE STRAND ANNEALING (SSA) REACTOME R-HSA-5693567.2	96	-0.528314	-1.09938	0.31039	0.975702
GLUCONEOGENESIS GOBP GO:0006094	28	-0.615288	-1.09938	0.353125	0.97489
ACTIVATION OF SMO REACTOME R-HSA-5635838.1	15	-0.672771	-1.09904	0.384013	0.97553
LIPID HOMEOSTASIS GOBP GO:0055088	73	-0.542808	-1.09903	0.305479	0.974718
HETEROTYPIC CELL-CELL ADHESION GOBP GO:0034113	20	-0.65685	-1.09891	0.382215	0.974391
AUTOPHAGY OF MITOCHONDRION GOBP GO:0000422	33	-0.607475	-1.0989	0.326718	0.973576
AUTOPHAGOSOME ASSEMBLY GOBP GO:0000045	50	-0.568298	-1.09857	0.321114	0.974203
DEFENSE RESPONSE TO BACTERIUM GOBP GO:0042742	45	-0.572219	-1.09833	0.335855	0.974358
HOMOLOGY DIRECTED REPAIR REACTOME R-HSA-5693538.2	102	-0.522047	-1.09813	0.329268	0.974372
CELL JUNCTION ORGANIZATION REACTOME DATABASE ID RELEASE 71 446728	57	-0.559784	-1.09784	0.332845	0.974726
SIGNAL TRANSDUCTION BY L1 REACTOME DATABASE ID RELEASE 71 445144	18	-0.641873	-1.09686	0.361426	0.978148
GLUCAGON-TYPE LIGAND RECEPTORS REACTOME DATABASE ID RELEASE 71 420092	16	-0.664193	-1.09666	0.375828	0.978195
POSITIVE REGULATION OF PEPTIDASE ACTIVITY GOBP GO:0010952	112	-0.51204	-1.09628	0.290066	0.979004
PURINE NUCLEOTIDE CATABOLIC PROCESS GOBP GO:0006195	25	-0.634137	-1.0962	0.353823	0.978494
STEROL BIOSYNTHETIC PROCESS GOBP GO:0016126	31	-0.606615	-1.09569	0.358553	0.979863
NUCLEOBASE-CONTAINING SMALL MOLECULE METABOLIC PROCESS GOBP GO:0055086	446	-0.466613	-1.0954	0.227174	0.980246
PHOSPHATIDYLINOSITOL METABOLIC PROCESS GOBP GO:0046488	127	-0.509667	-1.0953	0.296482	0.979841
TYPE 2 PAPILLARY RENAL CELL CARCINOMA WIKIPATHWAYS_20191210 WP4241 HOMO SAPIENS	30	-0.608483	-1.09528	0.357558	0.979087
TRANSFERRIN TRANSPORT GOBP GO:0033572	29	-0.621205	-1.09527	0.381599	0.97827
SMALL MOLECULE BIOSYNTHETIC PROCESS GOBP GO:0044283	350	-0.465734	-1.09491	0.239008	0.978946
EMBRYONIC SKELETAL SYSTEM DEVELOPMENT GOBP GO:0048706	34	-0.598097	-1.0948	0.357988	0.978568
ST_PHOSPHOINOSITIDE_3_KINASE_PATHWAY MSIGDB_C2 ST_PHOSPHOINOSITIDE_3_KINASE_PATHWAY	32	-0.600674	-1.09456	0.369231	0.978796
GLYCOSYL COMPOUND CATABOLIC PROCESS GOBP GO:1901658	24	-0.630571	-1.09438	0.387755	0.978735
MRNA 3'-END PROCESSING REACTOME R-HSA-72187.4	55	-0.566836	-1.09434	0.360632	0.978089
MACROPHAGE ACTIVATION GOBP GO:0042116	15	-0.660912	-1.09414	0.390572	0.978054
DNA GEOMETRIC CHANGE GOBP GO:0032392	57	-0.553849	-1.09374	0.316788	0.978881
GABA B RECEPTOR ACTIVATION REACTOME R-HSA-977444.1	22	-0.631499	-1.09372	0.357585	0.978128
CARBOXYLIC ACID BIOSYNTHETIC PROCESS GOBP GO:0046394	183	-0.495891	-1.0937	0.293689	0.977382
RIBONUCLEOPROTEIN COMPLEX EXPORT FROM NUCLEUS GOBP GO:0071426	109	-0.51646	-1.09365	0.309493	0.976764
MEMBRANE PROTEIN ECTODOMAIN PROTEOLYSIS GOBP GO:0006509	18	-0.654119	-1.09337	0.36526	0.977107
MITOCHONDRIAL TRANSLATIONAL TERMINATION GOBP GO:0070126	86	-0.527076	-1.09301	0.346509	0.97776
REGULATION OF TRANSFORMING GROWTH FACTOR BETA RECEPTOR SIGNALING PATHWAY GOBP GO:0017015	71	-0.537825	-1.09241	0.329201	0.979489
PROTEIN POLYUBIQUITINATION GOBP GO:0000209	261	-0.480994	-1.09223	0.284534	0.97948
ACTIN FILAMENT ORGANIZATION GOBP GO:0007015	155	-0.497244	-1.09141	0.322825	0.982093
ALPHA6BETA4INTEGRIN NETPATH ALPHA6BETA4INTEGRIN	68	-0.54361	-1.09122	0.328612	0.982014
3-PHOSPHOINOSITIDE DEGRADATION HUMANCYC PWY-6368	20	-0.640107	-1.09111	0.364501	0.981643
REGULATION OF MRNA SPLICING, VIA SPLICEOSOME GOBP GO:0048024	78	-0.53979	-1.09092	0.328276	0.98158
HALLMARK_P53_PATHWAY MSIGDB_C2 HALLMARK_P53_PATHWAY	173	-0.492244	-1.09079	0.306072	0.98133
TRANSCRIPTIONAL REGULATION BY TP53 REACTOME R-HSA-3700989.6	327	-0.471561	-1.09038	0.255946	0.982276
ACTIVATION OF GABAB RECEPTORS REACTOME DATABASE ID RELEASE 71 991365	22	-0.631499	-1.09038	0.36715	0.981457
SYNAPTIC VESICLE RECYCLING GOBP GO:0036465	27	-0.604703	-1.0902	0.363905	0.981401
AUTOPHAGOSOME ORGANIZATION GOBP GO:1905037	51	-0.563959	-1.08987	0.343137	0.981891
ADENYLATE CYCLASE-INHIBITING G PROTEIN-COUPLED RECEPTOR SIGNALING PATHWAY GOBP GO:0007193	22	-0.634094	-1.08955	0.380727	0.982415
REGULATION OF POTASSIUM ION TRANSMEMBRANE TRANSPORTER ACTIVITY GOBP GO:1901016	29	-0.604919	-1.08938	0.37156	0.982277
POSITIVE REGULATION OF DNA-BINDING TRANSCRIPTION FACTOR ACTIVITY GOBP GO:0051091	176	-0.493948	-1.08827	0.29484	0.98618
GLOMERULUS DEVELOPMENT GOBP GO:0032835	25	-0.609645	-1.08765	0.363077	0.987932
INTEGRIN-MEDIATED CELL ADHESION WIKIPATHWAYS_20191210 WP185 HOMO SAPIENS	83	-0.539555	-1.08762	0.324798	0.987192
VESICLE TARGETING, ROUGH ER TO CIS-GOLGI GOBP GO:0048207	58	-0.547762	-1.0876	0.318115	0.986452
RESPONSE TO TOPOLOGICALLY INCORRECT PROTEIN GOBP GO:0035966	140	-0.503115	-1.08743	0.308176	0.986335
INTERFERON TYPE I SIGNALING PATHWAYS WIKIPATHWAYS_20191210 WP585 HOMO SAPIENS	47	-0.56341	-1.08737	0.348597	0.985762
PROTEIN UBIQUITINATION GOBP GO:0016567	430	-0.46467	-1.08677	0.24425	0.987541
TNFS BIND THEIR PHYSIOLOGICAL RECEPTORS REACTOME R-HSA-5669034.2	17	-0.661035	-1.08626	0.393635	0.98886
CELL JUNCTION ASSEMBLY GOBP GO:0034329	108	-0.509269	-1.08613	0.32626	0.988561
SIGNALING BY NTRK2 (TRKB) REACTOME R-HSA-9006115.2	20	-0.637154	-1.08613	0.3906	0.987744
LIPOSACCHARIDE METABOLIC PROCESS GOBP GO:1903509	81	-0.530621	-1.08609	0.33795	0.987093
MITOCHONDRIAL TRANSLATION TERMINATION REACTOME R-HSA-5419276.1	85	-0.527114	-1.08564	0.312	0.988085
GLYCOLIPID METABOLIC PROCESS GOBP GO:0006664	81	-0.530621	-1.08563	0.332889	0.987298
ALPHA6BETA4INTEGRIN IOB ALPHA6BETA4INTEGRIN	62	-0.545269	-1.08547	0.329149	0.98713
LOCALIZATION WITHIN MEMBRANE GOBP GO:0051668	64	-0.545502	-1.08536	0.332394	0.986771
REGULATION OF INTRACELLULAR PH GOBP GO:0051453	59	-0.542284	-1.08499	0.338048	0.987469
RESPONSE TO ANTIBIOTIC GOBP GO:0046677	80	-0.53481	-1.08495	0.337032	0.986811
VITAMIN METABOLIC PROCESS GOBP GO:0006766	75	-0.529398	-1.08486	0.330251	0.986348
HYALURONAN METABOLIC PROCESS GOBP GO:0030212	18	-0.647958	-1.08482	0.386325	0.985682
UNSATURATED FATTY ACID BIOSYNTHETIC PROCESS GOBP GO:0006636	21	-0.630618	-1.08467	0.383361	0.985505
PID_S1P_META_PATHWAY MSIGDB_C2 PID_S1P_META_PATHWAY	17	-0.649953	-1.08442	0.3872	0.98577
LEARNING GOBP GO:0007612	34	-0.592014	-1.08417	0.361153	0.98597
SIGNALING BY RETINOIC ACID REACTOME DATABASE ID RELEASE 71 5362517	27	-0.616136	-1.08414	0.389831	0.985263
S1P3 PATHWAY PATHWAY INTERACTION DATABASE NCI-NATURE CURATED DATA S1P3 PATHWAY	22	-0.617423	-1.08411	0.372964	0.984586
NEGATIVE REGULATION OF CELL-MATRIX ADHESION GOBP GO:0001953	25	-0.634904	-1.08396	0.376623	0.984417
NEGATIVE REGULATION OF SIGNAL TRANSDUCTION BY P53 CLASS MEDIATOR GOBP GO:1901797	23	-0.619166	-1.08396	0.376997	0.983604
COFACTOR BIOSYNTHETIC PROCESS GOBP GO:0051188	160	-0.495214	-1.08389	0.319461	0.983047
N-GLYCAN ANTENNAE ELONGATION IN THE MEDIAL TRANS-GOLGI REACTOME DATABASE ID RELEASE 71 975576	18	-0.64333	-1.08381	0.401914	0.982571
ACTIN FILAMENT BUNDLE ASSEMBLY GOBP GO:0051017	50	-0.563079	-1.08373	0.359375	0.982103
HALLMARK_PANCREAS_BETA_CELLS MSIGDB_C2 HALLMARK_PANCREAS_BETA_CELLS	17	-0.657317	-1.08365	0.397456	0.981617
MITOCHONDRIAL TRANSLATIONAL ELONGATION GOBP GO:0070125	85	-0.519457	-1.08359	0.324693	0.981061
GLYCOSAMINOGLYCAN CATABOLIC PROCESS GOBP GO:0006027	44	-0.567232	-1.08348	0.348837	0.980708
REGULATION OF BETA-CELL DEVELOPMENT REACTOME R-HSA-186712.2	19	-0.632304	-1.08345	0.377327	0.980028
INOSITOL PHOSPHATE METABOLISM REACTOME R-HSA-1483249.3	42	-0.573237	-1.08339	0.353285	0.979445
PLATELET CALCIUM HOMEOSTASIS REACTOME R-HSA-418360.1	20	-0.64405	-1.08332	0.394525	0.978896
EPIBOLY INVOLVED IN WOUND HEALING GOBP GO:0090505	18	-0.640908	-1.0831	0.398387	0.979017
RESPONSE TO DRUG GOBP GO:0042493	294	-0.4699	-1.08297	0.282932	0.97873
POSITIVE REGULATION OF CYSTEINE-TYPE ENDOPEPTIDASE ACTIVITY INVOLVED IN APOPTOTIC PROCESS GOBP GO:0043280	82	-0.522343	-1.08275	0.331978	0.97883
REGULATION OF B CELL PROLIFERATION GOBP GO:0030888	21	-0.639948	-1.08272	0.404651	0.97817
NABA_ECM_GLYCOPROTEINS MSIGDB_C2 NABA_ECM_GLYCOPROTEINS	116	-0.505203	-1.08258	0.315789	0.97794
REGULATION OF TUMOR NECROSIS FACTOR PRODUCTION GOBP GO:0032680	58	-0.550601	-1.08255	0.36903	0.977267
TETRAPYRROLE BIOSYNTHETIC PROCESS GOBP GO:0033014	18	-0.643525	-1.08254	0.41206	0.976501
EPIBOLY GOBP GO:0090504	19	-0.640853	-1.08187	0.384244	0.978498
POSITIVE REGULATION OF NIK/NF-KAPPAB SIGNALING GOBP GO:1901224	44	-0.562661	-1.08186	0.374817	0.977744
LATE ENDOSOMAL MICROAUTOPHAGY REACTOME R-HSA-9615710.3	27	-0.61434	-1.08184	0.3875	0.977051
ENTRY INTO OTHER ORGANISM INVOLVED IN SYMBIOTIC INTERACTION GOBP GO:0051828	26	-0.614682	-1.08178	0.387147	0.976469
COPII VESICLE COATING GOBP GO:0048208	58	-0.547762	-1.08173	0.349858	0.975895
PHOTOPERIODISM GOBP GO:0009648	19	-0.631979	-1.08169	0.395731	0.975255
NEGATIVE REGULATION OF TRANSFORMING GROWTH FACTOR BETA RECEPTOR SIGNALING PATHWAY GOBP GO:0030512	45	-0.57678	-1.08111	0.36896	0.976818
REGULATION OF CELL AGING GOBP GO:0090342	27	-0.61619	-1.08104	0.375767	0.976335
REGULATION OF CELLULAR PH GOBP GO:0030641	61	-0.541945	-1.08074	0.357654	0.976709
REGULATION OF CELLULAR RESPONSE TO TRANSFORMING GROWTH FACTOR BETA STIMULUS GOBP GO:1903844	71	-0.537825	-1.08014	0.351314	0.978316
NEGATIVE REGULATION OF CALCIUM ION TRANSMEMBRANE TRANSPORT GOBP GO:1903170	15	-0.662569	-1.07973	0.410175	0.979201
NEGATIVE REGULATION OF ORGANELLE ASSEMBLY GOBP GO:1902116	29	-0.607951	-1.07971	0.381847	0.978498
POSITIVE REGULATION OF HYDROLASE ACTIVITY GOBP GO:0051345	332	-0.468703	-1.07965	0.292711	0.977954
NUCLEAR SIGNALING BY ERBB4 REACTOME DATABASE ID RELEASE 71 1251985	24	-0.619515	-1.07958	0.401914	0.977435
ESTABLISHMENT OF MITOTIC SPINDLE LOCALIZATION GOBP GO:0040001	28	-0.598998	-1.07938	0.39084	0.977437
POSITIVE REGULATION OF COENZYME METABOLIC PROCESS GOBP GO:0051197	16	-0.648862	-1.07937	0.406452	0.976667
POSITIVE REGULATION OF GLYCOLYTIC PROCESS GOBP GO:0045821	16	-0.648862	-1.07908	0.414966	0.977027
POSITIVE REGULATION OF RESPONSE TO DNA DAMAGE STIMULUS GOBP GO:2001022	87	-0.520839	-1.07899	0.348404	0.976609
RIBONUCLEOTIDE CATABOLIC PROCESS GOBP GO:0009261	18	-0.640324	-1.07832	0.388889	0.978554
PROSTANOID METABOLIC PROCESS GOBP GO:0006692	20	-0.628306	-1.07812	0.379747	0.978591
MESODERM FORMATION GOBP GO:0001707	18	-0.638834	-1.07812	0.405797	0.977814
ACTIN FILAMENT BUNDLE ORGANIZATION GOBP GO:0061572	52	-0.55884	-1.07792	0.356828	0.977884
DNA-TEMPLATED TRANSCRIPTION, ELONGATION GOBP GO:0006354	80	-0.531686	-1.07764	0.335989	0.978232
SIG_BCR_SIGNALING_PATHWAY MSIGDB_C2 SIG_BCR_SIGNALING_PATHWAY	38	-0.586493	-1.07763	0.384728	0.977463
PORPHYRIN-CONTAINING COMPOUND BIOSYNTHETIC PROCESS GOBP GO:0006779	17	-0.644395	-1.07739	0.390323	0.977688
ALPHA4 BETA1 INTEGRIN SIGNALING EVENTS PATHWAY INTERACTION DATABASE NCI-NATURE CURATED DATA ALPHA4 BETA1 INTEGRIN SIGNALING EVENTS	29	-0.603751	-1.07724	0.398734	0.977499
SUPRAMOLECULAR FIBER ORGANIZATION GOBP GO:0097435	286	-0.46893	-1.07709	0.305621	0.977303
PEPTIDE HORMONE METABOLISM REACTOME R-HSA-2980736.2	52	-0.558113	-1.07704	0.363248	0.97675
LATE PHASE OF HIV LIFE CYCLE REACTOME DATABASE ID RELEASE 71 162599	124	-0.507812	-1.07696	0.328205	0.976273
RESPONSE TO ARSENIC-CONTAINING SUBSTANCE GOBP GO:0046685	20	-0.63279	-1.07692	0.408736	0.975633
POSITIVE REGULATION OF SECRETION GOBP GO:0051047	179	-0.486251	-1.0766	0.317518	0.976067
MYOMETRIAL RELAXATION AND CONTRACTION PATHWAYS WIKIPATHWAYS_20191210 WP289 HOMO SAPIENS	111	-0.509186	-1.07633	0.349351	0.976388
FORMATION OF THE EARLY ELONGATION COMPLEX REACTOME DATABASE ID RELEASE 71 113418	33	-0.584045	-1.07625	0.367713	0.975911
SYNAPTIC VESICLE ENDOCYTOSIS GOBP GO:0048488	23	-0.614143	-1.07622	0.402866	0.975262
ENTRY INTO HOST CELL GOBP GO:0030260	26	-0.614682	-1.07604	0.410774	0.975243
TRANSPORT OF VITAMINS, NUCLEOSIDES, AND RELATED MOLECULES REACTOME R-HSA-425397.3	27	-0.606924	-1.07576	0.382353	0.975613
ENTRAINMENT OF CIRCADIAN CLOCK BY PHOTOPERIOD GOBP GO:0043153	18	-0.632117	-1.07576	0.400951	0.974865
SUMOYLATION OF TRANSCRIPTION FACTORS REACTOME R-HSA-3232118.7	15	-0.65363	-1.0754	0.424293	0.975481
CELLULAR RESPONSE TO ABIOTIC STIMULUS GOBP GO:0071214	165	-0.484059	-1.07528	0.320849	0.975181
SPHINGOSINE 1-PHOSPHATE (S1P) PATHWAY PATHWAY INTERACTION DATABASE NCI-NATURE CURATED DATA SPHINGOSINE 1-PHOSPHATE (S1P) PATHWAY	17	-0.649953	-1.07517	0.409018	0.974824
PID_INTEGRIN_A4B1_PATHWAY MSIGDB_C2 PID_INTEGRIN_A4B1_PATHWAY	29	-0.603751	-1.07512	0.386997	0.974256
APOPTOTIC EXECUTION PHASE REACTOME DATABASE ID RELEASE 71 75153	37	-0.581398	-1.07482	0.390533	0.974705
FORMATION OF THE HIV-1 EARLY ELONGATION COMPLEX REACTOME DATABASE ID RELEASE 71 167158	33	-0.584045	-1.07479	0.376119	0.974062
GLYCOSAMINOGLYCAN METABOLISM REACTOME DATABASE ID RELEASE 71 1630316	97	-0.50965	-1.0747	0.350948	0.973675
MITOCHONDRIAL TRANSLATION INITIATION REACTOME R-HSA-5368286.1	85	-0.518327	-1.0738	0.348465	0.976545
ENTRY INTO CELL OF OTHER ORGANISM INVOLVED IN SYMBIOTIC INTERACTION GOBP GO:0051806	26	-0.614682	-1.07364	0.373437	0.976445
REGULATION OF NEURON APOPTOTIC PROCESS GOBP GO:0043523	75	-0.53289	-1.07337	0.355191	0.976773
PRESYNAPTIC ENDOCYTOSIS GOBP GO:0140238	23	-0.614143	-1.07273	0.391975	0.978578
CROSS-PRESENTATION OF SOLUBLE EXOGENOUS ANTIGENS (ENDOSOMES) REACTOME R-HSA-1236978.1	45	-0.567005	-1.07261	0.380608	0.978259
ALCOHOL CATABOLIC PROCESS GOBP GO:0046164	22	-0.637165	-1.07212	0.425076	0.979471
INOSITOL PHOSPHATE METABOLIC PROCESS GOBP GO:0043647	45	-0.564583	-1.07194	0.374269	0.979479
REGULATION OF PH GOBP GO:0006885	62	-0.540462	-1.07193	0.384401	0.978732
CELLULAR AMINO ACID METABOLIC PROCESS GOBP GO:0006520	194	-0.477969	-1.0715	0.320191	0.979769
MITOCHONDRIAL TRANSLATION ELONGATION REACTOME R-HSA-5389840.1	84	-0.519713	-1.0713	0.347705	0.979774
FOLATE METABOLISM WIKIPATHWAYS_20191210 WP176 HOMO SAPIENS	38	-0.574216	-1.07121	0.378655	0.979366
SIGNALING BY ERBB4 REACTOME DATABASE ID RELEASE 71 1236394	39	-0.567782	-1.07114	0.357675	0.978907
MICROGLIA PATHOGEN PHAGOCYTOSIS PATHWAY WIKIPATHWAYS_20191210 WP3937 HOMO SAPIENS	23	-0.624438	-1.0709	0.378205	0.979135
ORGANELLE FUSION GOBP GO:0048284	80	-0.529355	-1.07081	0.365123	0.978732
REGULATION OF GLUCAN BIOSYNTHETIC PROCESS GOBP GO:0010962	18	-0.636014	-1.07041	0.412266	0.979545
NUCLEOBASE CATABOLISM REACTOME R-HSA-8956319.1	22	-0.615876	-1.07037	0.41374	0.978968
ENTRY INTO HOST GOBP GO:0044409	26	-0.614682	-1.07011	0.390769	0.979261
SIGNALING BY PTK6 REACTOME DATABASE ID RELEASE 71 8848021	41	-0.561559	-1.06984	0.381818	0.979601
REGULATION OF TP53 ACTIVITY THROUGH ACETYLATION REACTOME DATABASE ID RELEASE 71 6804758	30	-0.590653	-1.06952	0.385432	0.980072
JNK CASCADE GOBP GO:0007254	56	-0.541919	-1.06934	0.367376	0.980029
MITOCHONDRION ORGANIZATION GOBP GO:0007005	347	-0.458258	-1.06933	0.320356	0.979318
RUNX2 REGULATES OSTEOBLAST DIFFERENTIATION REACTOME R-HSA-8940973.1	18	-0.628611	-1.06911	0.402421	0.97944
RNA SPLICING GOBP GO:0008380	293	-0.465618	-1.0691	0.317101	0.9787
REGULATION OF INSULIN SECRETION REACTOME DATABASE ID RELEASE 71 422356	51	-0.551346	-1.06896	0.384844	0.978559
GLYCOLYTIC PROCESS GOBP GO:0006096	28	-0.597941	-1.06891	0.396875	0.977973
NUCLEAR TRANSPORT GOBP GO:0051169	195	-0.47804	-1.06881	0.320482	0.977614
ANTIGEN PROCESSING: UBIQUITINATION & PROTEASOME DEGRADATION REACTOME DATABASE ID RELEASE 71 983168	269	-0.469179	-1.06876	0.32093	0.977054
NUCLEOSIDE PHOSPHATE METABOLIC PROCESS GOBP GO:0006753	378	-0.455453	-1.06866	0.310421	0.976689
REGULATION OF PROTEIN LOCALIZATION TO CELL SURFACE GOBP GO:2000008	27	-0.60086	-1.06843	0.421053	0.976866
T-CELL RECEPTOR AND CO-STIMULATORY SIGNALING WIKIPATHWAYS_20191210 WP2583 HOMO SAPIENS	21	-0.612724	-1.06807	0.393939	0.977534
NUCLEOSIDE PHOSPHATE BIOSYNTHETIC PROCESS GOBP GO:1901293	177	-0.47772	-1.06803	0.335373	0.97697
INTEGRIN-LINKED KINASE SIGNALING PATHWAY INTERACTION DATABASE NCI-NATURE CURATED DATA INTEGRIN-LINKED KINASE SIGNALING	42	-0.56779	-1.06801	0.382353	0.976278
PID_PI3KCI_AKT_PATHWAY MSIGDB_C2 PID_PI3KCI_AKT_PATHWAY	33	-0.583366	-1.068	0.381679	0.975598
CELLULAR RESPONSE TO ENVIRONMENTAL STIMULUS GOBP GO:0104004	165	-0.484059	-1.06793	0.339045	0.975093
AMINOGLYCAN CATABOLIC PROCESS GOBP GO:0006026	46	-0.561817	-1.06793	0.377273	0.974353
HALLMARK_MYOGENESIS MSIGDB_C2 HALLMARK_MYOGENESIS	144	-0.48938	-1.06773	0.348329	0.974384
ACTIVATION OF INNATE IMMUNE RESPONSE GOBP GO:0002218	174	-0.482426	-1.0675	0.336175	0.974558
POSITIVE REGULATION OF LIPID LOCALIZATION GOBP GO:1905954	39	-0.572617	-1.06733	0.395963	0.974453
NEGATIVE REGULATION OF G2/M TRANSITION OF MITOTIC CELL CYCLE GOBP GO:0010972	76	-0.519152	-1.06723	0.372093	0.974086
ALCOHOL METABOLIC PROCESS GOBP GO:0006066	150	-0.486092	-1.06714	0.331202	0.973691
NUCLEOBASE-CONTAINING SMALL MOLECULE BIOSYNTHETIC PROCESS GOBP GO:0034404	92	-0.511815	-1.06711	0.364706	0.973075
CELLULAR RESPONSE TO CYTOKINE STIMULUS GOBP GO:0071345	493	-0.451407	-1.06702	0.286325	0.972655
FIBRIN COMPLEMENT RECEPTOR 3 SIGNALING PATHWAY WIKIPATHWAYS_20191210 WP4136 HOMO SAPIENS	24	-0.610683	-1.06699	0.401244	0.972051
GLUCAGON SIGNALING IN METABOLIC REGULATION REACTOME DATABASE ID RELEASE 71 163359	22	-0.603864	-1.06684	0.410769	0.971909
WOUND HEALING, SPREADING OF CELLS GOBP GO:0044319	18	-0.640908	-1.06674	0.41252	0.971579
REGULATION OF CELLULAR RESPONSE TO GROWTH FACTOR STIMULUS GOBP GO:0090287	153	-0.489163	-1.06643	0.363864	0.972043
PROSTAGLANDIN METABOLIC PROCESS GOBP GO:0006693	20	-0.628306	-1.06638	0.411003	0.971474
POST-TRANSLATIONAL PROTEIN PHOSPHORYLATION REACTOME DATABASE ID RELEASE 71 8957275	68	-0.532436	-1.06597	0.388102	0.972372
MONOSACCHARIDE CATABOLIC PROCESS GOBP GO:0046365	48	-0.553111	-1.06591	0.381636	0.971872
PROTEIN IMPORT INTO NUCLEUS GOBP GO:0006606	57	-0.539288	-1.06567	0.383602	0.972119
NUCLEOTIDE PHOSPHORYLATION GOBP GO:0046939	36	-0.572995	-1.06496	0.394428	0.974115
THIOESTER METABOLIC PROCESS GOBP GO:0035383	62	-0.538838	-1.06488	0.376404	0.973652
NOTCH3 ACTIVATION AND TRANSMISSION OF SIGNAL TO THE NUCLEUS REACTOME DATABASE ID RELEASE 71 9013507	22	-0.627064	-1.06481	0.405583	0.9732
NUCLEAR EXPORT GOBP GO:0051168	137	-0.48176	-1.06462	0.349747	0.973206
CYTOPLASMIC SEQUESTERING OF PROTEIN GOBP GO:0051220	21	-0.618333	-1.06458	0.410575	0.972611
REGULATION OF DENDRITE DEVELOPMENT GOBP GO:0050773	73	-0.523774	-1.06456	0.367461	0.971957
IMMUNOREGULATORY INTERACTIONS BETWEEN A LYMPHOID AND A NON-LYMPHOID CELL REACTOME R-HSA-198933.5	26	-0.599172	-1.06409	0.393189	0.973079
PROTEIN N-LINKED GLYCOSYLATION GOBP GO:0006487	62	-0.540011	-1.06398	0.373072	0.972751
POSITIVE REGULATION OF NUCLEOTIDE CATABOLIC PROCESS GOBP GO:0030813	16	-0.648862	-1.06398	0.423567	0.972019
INTEGRATED CANCER PATHWAY WIKIPATHWAYS_20191210 WP1971 HOMO SAPIENS	44	-0.562513	-1.06397	0.372434	0.971327
ONE CARBON METABOLISM WIKIPATHWAYS_20191210 WP241 HOMO SAPIENS	22	-0.615325	-1.06395	0.408293	0.970685
INTERACTION WITH HOST GOBP GO:0051701	63	-0.5356	-1.0639	0.384397	0.970164
ACYL-COA METABOLIC PROCESS GOBP GO:0006637	62	-0.538838	-1.06353	0.378223	0.970895
HALLMARK_KRAS_SIGNALING_UP MSIGDB_C2 HALLMARK_KRAS_SIGNALING_UP	142	-0.486104	-1.06347	0.356688	0.970422
EMBRYO DEVELOPMENT ENDING IN BIRTH OR EGG HATCHING GOBP GO:0009792	127	-0.493307	-1.06333	0.340206	0.970242
GENE SILENCING BY MIRNA GOBP GO:0035195	39	-0.558259	-1.06318	0.389127	0.970101
CLASS I PI3K SIGNALING EVENTS MEDIATED BY AKT PATHWAY INTERACTION DATABASE NCI-NATURE CURATED DATA CLASS I PI3K SIGNALING EVENTS MEDIATED BY AKT	33	-0.583366	-1.06309	0.388179	0.969736
ANTIGEN PROCESSING AND PRESENTATION GOBP GO:0019882	159	-0.487102	-1.06281	0.354798	0.970092
REGULATION OF TORC1 SIGNALING GOBP GO:1903432	30	-0.594543	-1.06272	0.398764	0.969681
CELL CYCLE CHECKPOINTS REACTOME R-HSA-69620.2	249	-0.465146	-1.0623	0.319098	0.970608
ARACHIDONIC ACID METABOLISM REACTOME R-HSA-2142753.5	24	-0.604957	-1.06221	0.422893	0.97025
ORGANIC HYDROXY COMPOUND BIOSYNTHETIC PROCESS GOBP GO:1901617	96	-0.513118	-1.0618	0.366013	0.971032
CELLULAR RESPONSE TO AMINO ACID STARVATION GOBP GO:0034198	35	-0.572102	-1.06174	0.4	0.970542
STRESS-ACTIVATED PROTEIN KINASE SIGNALING CASCADE GOBP GO:0031098	104	-0.503005	-1.06148	0.366271	0.970822
TRANSITION METAL ION TRANSPORT GOBP GO:0000041	64	-0.533392	-1.06144	0.388571	0.970218
CENTRAL NERVOUS SYSTEM NEURON AXONOGENESIS GOBP GO:0021955	18	-0.628518	-1.06111	0.422468	0.970814
REGULATION OF TRANSLATIONAL INITIATION GOBP GO:0006446	65	-0.524436	-1.06059	0.376389	0.972098
GOLGI ASSOCIATED VESICLE BIOGENESIS REACTOME R-HSA-432722.3	51	-0.54448	-1.06053	0.40416	0.971612
SIGNALING PATHWAYS IN GLIOBLASTOMA WIKIPATHWAYS_20191210 WP2261 HOMO SAPIENS	74	-0.520828	-1.06018	0.361673	0.972257
DOWNSTREAM SIGNALING OF ACTIVATED FGFR1 REACTOME R-HSA-5654687.2	17	-0.643738	-1.0601	0.436019	0.971817
RESPONSE TO UNFOLDED PROTEIN GOBP GO:0006986	119	-0.498664	-1.05981	0.362069	0.972214
ACTIVATION OF CYSTEINE-TYPE ENDOPEPTIDASE ACTIVITY INVOLVED IN APOPTOTIC PROCESS GOBP GO:0006919	55	-0.536145	-1.05931	0.396802	0.973438
CELL KILLING GOBP GO:0001906	18	-0.630247	-1.05922	0.409018	0.973057
VESICLE COATING GOBP GO:0006901	61	-0.541418	-1.05914	0.397695	0.972661
CELLULAR RESPONSE TO MISFOLDED PROTEIN GOBP GO:0071218	20	-0.632298	-1.05906	0.432217	0.972252
VESICLE TARGETING, TO, FROM OR WITHIN GOLGI GOBP GO:0048199	64	-0.529269	-1.05877	0.375668	0.972589
OSTEOCLAST DIFFERENTIATION GOBP GO:0030316	20	-0.63219	-1.05876	0.426202	0.971905
UREA CYCLE AND ASSOCIATED PATHWAYS WIKIPATHWAYS_20191210 WP4595 HOMO SAPIENS	17	-0.638784	-1.05866	0.428571	0.971554
TRNA PROCESSING GOBP GO:0008033	95	-0.50875	-1.05841	0.356488	0.971789
REGULATION OF DNA-BINDING TRANSCRIPTION FACTOR ACTIVITY GOBP GO:0051090	284	-0.46001	-1.0584	0.341928	0.971115
TNFALPHA NETPATH TNFALPHA	252	-0.464683	-1.05827	0.34104	0.970866
MITOCHONDRIAL TRANSLATION REACTOME DATABASE ID RELEASE 71 5368287	90	-0.506441	-1.05826	0.37889	0.970181
PLC BETA MEDIATED EVENTS REACTOME DATABASE ID RELEASE 71 112043	38	-0.566651	-1.05778	0.392908	0.971212
AMYLOID PRECURSOR PROTEIN METABOLIC PROCESS GOBP GO:0042982	15	-0.63615	-1.05777	0.42735	0.970543
RESPONSE TO VIRUS GOBP GO:0009615	133	-0.483664	-1.05776	0.360969	0.969862
G ALPHA (Z) SIGNALLING EVENTS REACTOME DATABASE ID RELEASE 71 418597	30	-0.594001	-1.05756	0.395672	0.969925
TRYPTOPHAN METABOLISM WIKIPATHWAYS_20191210 WP465 HOMO SAPIENS	20	-0.624591	-1.05756	0.436335	0.969231
POSITIVE REGULATION OF SUBSTRATE ADHESION-DEPENDENT CELL SPREADING GOBP GO:1900026	26	-0.604421	-1.05749	0.413355	0.968773
RAB GERANYLGERANYLATION REACTOME R-HSA-8873719.2	57	-0.532652	-1.05722	0.390988	0.969132
REGULATION OF NEURON PROJECTION DEVELOPMENT GOBP GO:0010975	244	-0.459119	-1.05693	0.352	0.969556
RNA POLYMERASE III CHAIN ELONGATION REACTOME R-HSA-73780.2	17	-0.619821	-1.05664	0.416388	0.969869
ENERGY DEPENDENT REGULATION OF MTOR BY LKB1-AMPK REACTOME DATABASE ID RELEASE 71 380972	27	-0.590386	-1.05662	0.407166	0.969247
REGULATION OF SYSTEMIC ARTERIAL BLOOD PRESSURE MEDIATED BY A CHEMICAL SIGNAL GOBP GO:0003044	21	-0.613986	-1.05659	0.410413	0.968643
REGULATION OF MRNA POLYADENYLATION GOBP GO:1900363	18	-0.635451	-1.05646	0.46167	0.968421
REGULATION OF TUMOR NECROSIS FACTOR SUPERFAMILY CYTOKINE PRODUCTION GOBP GO:1903555	60	-0.535334	-1.05616	0.384286	0.968857
NEGATIVE REGULATION OF INTRACELLULAR SIGNAL TRANSDUCTION GOBP GO:1902532	343	-0.458828	-1.056	0.347007	0.968759
G BETA:GAMMA SIGNALLING THROUGH PI3KGAMMA REACTOME DATABASE ID RELEASE 71 392451	17	-0.638938	-1.0559	0.399031	0.968452
SIGNALING BY NON-RECEPTOR TYROSINE KINASES REACTOME R-HSA-9006927.3	41	-0.561559	-1.05582	0.40176	0.968061
TRANS-GOLGI NETWORK VESICLE BUDDING REACTOME R-HSA-199992.3	67	-0.519056	-1.0556	0.375178	0.96814
COFACTOR METABOLIC PROCESS GOBP GO:0051186	330	-0.454774	-1.05549	0.337066	0.96788
NUCLEOSIDE TRIPHOSPHATE BIOSYNTHETIC PROCESS GOBP GO:0009142	64	-0.529904	-1.05485	0.402282	0.969554
MUSCLE STRUCTURE DEVELOPMENT GOBP GO:0061061	173	-0.479404	-1.05458	0.362832	0.969862
SUPERPATHWAY OF INOSITOL PHOSPHATE COMPOUNDS HUMANCYC PWY-6371	60	-0.529028	-1.05457	0.393197	0.969195
POSITIVE REGULATION OF SECRETION BY CELL GOBP GO:1903532	172	-0.473538	-1.05413	0.366127	0.970171
PYRUVATE METABOLIC PROCESS GOBP GO:0006090	48	-0.540062	-1.05374	0.391053	0.971043
PHOSPHATIDYLGLYCEROL METABOLIC PROCESS GOBP GO:0046471	18	-0.634694	-1.05342	0.438424	0.971525
EPITHELIUM DEVELOPMENT GOBP GO:0060429	339	-0.453708	-1.0533	0.344789	0.971275
COGNITION GOBP GO:0050890	89	-0.51167	-1.05304	0.379128	0.97155
CCR1 IOB CCR1	17	-0.628648	-1.053	0.441708	0.970953
PROTEIN K11-LINKED UBIQUITINATION GOBP GO:0070979	25	-0.598698	-1.05295	0.438871	0.97044
G BETA:GAMMA SIGNALLING THROUGH CDC42 REACTOME R-HSA-8964616.1	15	-0.648287	-1.05283	0.4375	0.970187
VESICLE BUDDING FROM MEMBRANE GOBP GO:0006900	85	-0.510465	-1.05258	0.375676	0.970407
CHORDATE EMBRYONIC DEVELOPMENT GOBP GO:0043009	120	-0.495614	-1.05255	0.379714	0.969846
NUCLEOSIDE DIPHOSPHATE PHOSPHORYLATION GOBP GO:0006165	35	-0.57658	-1.05232	0.406158	0.970047
NIK/NF-KAPPAB SIGNALING GOBP GO:0038061	70	-0.523569	-1.05204	0.381868	0.970408
MONOCARBOXYLIC ACID METABOLIC PROCESS GOBP GO:0032787	262	-0.461354	-1.05067	0.365429	0.974801
POSITIVE REGULATION OF PROTEIN SECRETION GOBP GO:0050714	111	-0.496031	-1.04899	0.381137	0.980373
BIOCARTA_MYOSIN_PATHWAY MSIGDB_C2 BIOCARTA_MYOSIN_PATHWAY	24	-0.605405	-1.04891	0.425432	0.979995
GLYCOLYTIC PROCESS THROUGH GLUCOSE-6-PHOSPHATE GOBP GO:0061620	24	-0.596712	-1.0483	0.437898	0.981615
INTEGRIN CELL SURFACE INTERACTIONS REACTOME R-HSA-216083.2	45	-0.549283	-1.04823	0.401418	0.981197
REGULATION OF CYTOKINE PRODUCTION INVOLVED IN IMMUNE RESPONSE GOBP GO:0002718	39	-0.556106	-1.04817	0.412556	0.980734
PROTEIN LOCALIZATION TO PLASMA MEMBRANE GOBP GO:0072659	136	-0.47962	-1.04812	0.402062	0.980219
REGULATION OF LEUKOCYTE MEDIATED IMMUNITY GOBP GO:0002703	76	-0.520948	-1.04782	0.410151	0.980692
REGULATION OF MEMBRANE DEPOLARIZATION GOBP GO:0003254	22	-0.603743	-1.04779	0.411402	0.9801
GLUTAMATE RECEPTOR SIGNALING PATHWAY GOBP GO:0007215	19	-0.626105	-1.04763	0.459016	0.979971
MUSCLE CONTRACTION REACTOME DATABASE ID RELEASE 71 397014	110	-0.494341	-1.04763	0.388451	0.9793
POSITIVE REGULATION OF TRANSCRIPTION BY RNA POLYMERASE I GOBP GO:0045943	22	-0.599899	-1.0476	0.420546	0.978712
GPVI-MEDIATED ACTIVATION CASCADE REACTOME DATABASE ID RELEASE 71 114604	19	-0.617923	-1.0471	0.450237	0.979973
ATTACHMENT OF SPINDLE MICROTUBULES TO KINETOCHORE GOBP GO:0008608	21	-0.609476	-1.04705	0.428786	0.979439
SPHINGOLIPID METABOLIC PROCESS GOBP GO:0006665	99	-0.497613	-1.04696	0.393659	0.97911
NUCLEOTIDE METABOLIC PROCESS GOBP GO:0009117	373	-0.450017	-1.04683	0.369127	0.97894
DNA DOUBLE-STRAND BREAK PROCESSING GOBP GO:0000729	19	-0.616129	-1.04681	0.423895	0.978317
REGULATION OF HOMOTYPIC CELL-CELL ADHESION GOBP GO:0034110	16	-0.6315	-1.04667	0.469218	0.978184
NADH REGENERATION GOBP GO:0006735	24	-0.596712	-1.04656	0.444104	0.977884
RESPONSE TO AMINO ACID STARVATION GOBP GO:1990928	36	-0.571115	-1.046	0.435786	0.979262
TRANSFORMING GROWTH FACTOR BETA RECEPTOR SIGNALING PATHWAY GOBP GO:0007179	66	-0.521248	-1.04595	0.395652	0.978739
ENZYME LINKED RECEPTOR PROTEIN SIGNALING PATHWAY GOBP GO:0007167	451	-0.44633	-1.0459	0.352248	0.97823
REGULATION OF NIK/NF-KAPPAB SIGNALING GOBP GO:1901222	62	-0.525497	-1.04583	0.416438	0.977828
TRANSCRIPTIONAL REGULATION BY RUNX1 REACTOME R-HSA-8878171.3	149	-0.477845	-1.04569	0.355414	0.977671
ICOSANOID BIOSYNTHETIC PROCESS GOBP GO:0046456	20	-0.621206	-1.04564	0.445528	0.977152
REGULATION OF GLYCOGEN BIOSYNTHETIC PROCESS GOBP GO:0005979	18	-0.636014	-1.04541	0.450886	0.977317
SMALL MOLECULE CATABOLIC PROCESS GOBP GO:0044282	261	-0.45782	-1.04531	0.380682	0.976997
COFACTOR TRANSPORT GOBP GO:0051181	26	-0.582341	-1.04483	0.410769	0.97804
MONONUCLEAR CELL PROLIFERATION GOBP GO:0032943	18	-0.623213	-1.04383	0.453822	0.980885
PYRIDINE-CONTAINING COMPOUND BIOSYNTHETIC PROCESS GOBP GO:0072525	49	-0.535666	-1.04376	0.413199	0.98045
CHOLESTEROL BIOSYNTHESIS REACTOME R-HSA-191273.4	21	-0.609859	-1.04376	0.43349	0.979778
POSITIVE REGULATION OF COFACTOR METABOLIC PROCESS GOBP GO:0051194	17	-0.616949	-1.04375	0.431062	0.979123
INTERMEDIATE FILAMENT-BASED PROCESS GOBP GO:0045103	20	-0.6111	-1.04357	0.438017	0.9791
POSITIVE REGULATION OF CYSTEINE-TYPE ENDOPEPTIDASE ACTIVITY GOBP GO:2001056	90	-0.503139	-1.04341	0.393859	0.978982
GLUCOSE CATABOLIC PROCESS TO PYRUVATE GOBP GO:0061718	24	-0.596712	-1.04316	0.426584	0.979249
MITOCHONDRIAL TRANSLATION GOBP GO:0032543	108	-0.494645	-1.04301	0.413924	0.979128
REGULATION OF ALTERNATIVE MRNA SPLICING, VIA SPLICEOSOME GOBP GO:0000381	53	-0.537994	-1.0429	0.42368	0.978875
EXTRINSIC APOPTOTIC SIGNALING PATHWAY VIA DEATH DOMAIN RECEPTORS GOBP GO:0008625	23	-0.609167	-1.04288	0.440439	0.978264
POSITIVE REGULATION OF VASCULAR SMOOTH MUSCLE CELL PROLIFERATION GOBP GO:1904707	17	-0.6292	-1.04205	0.437596	0.980626
SELECTIVE AUTOPHAGY GOBP GO:0061912	18	-0.623197	-1.04183	0.477564	0.980746
NANOMATERIAL INDUCED APOPTOSIS WIKIPATHWAYS_20191210 WP2507 HOMO SAPIENS	18	-0.619878	-1.0412	0.444444	0.982359
CELL CYCLE G2/M PHASE TRANSITION GOBP GO:0044839	121	-0.483987	-1.04113	0.39313	0.98191
ENTRAINMENT OF CIRCADIAN CLOCK GOBP GO:0009649	20	-0.612042	-1.0408	0.456829	0.982422
INSULIN RECEPTOR SIGNALLING CASCADE REACTOME DATABASE ID RELEASE 71 74751	34	-0.567871	-1.04057	0.419019	0.982572
ENERGY HOMEOSTASIS GOBP GO:0097009	16	-0.629991	-1.04052	0.468954	0.982093
CANONICAL GLYCOLYSIS GOBP GO:0061621	24	-0.596712	-1.03972	0.426584	0.984308
NUCLEOSIDE CATABOLIC PROCESS GOBP GO:0009164	17	-0.616358	-1.03966	0.450082	0.983887
NEGATIVE REGULATION OF CELL CYCLE GOBP GO:0045786	439	-0.443241	-1.03961	0.355532	0.983358
SEMI-LUNAR VALVE DEVELOPMENT GOBP GO:1905314	28	-0.591385	-1.03957	0.423197	0.982846
G2/M TRANSITION OF MITOTIC CELL CYCLE GOBP GO:0000086	119	-0.484896	-1.0394	0.414268	0.982779
PHOSPHOLIPID METABOLIC PROCESS GOBP GO:0006644	258	-0.456387	-1.03902	0.393975	0.983536
AEROBIC ELECTRON TRANSPORT CHAIN GOBP GO:0019646	15	-0.619866	-1.03871	0.462609	0.984004
VENTRICULAR CARDIAC MUSCLE TISSUE MORPHOGENESIS GOBP GO:0055010	19	-0.614442	-1.03871	0.444623	0.983338
OOGENESIS GOBP GO:0048477	17	-0.618744	-1.03849	0.436989	0.983446
GABA RECEPTOR ACTIVATION REACTOME R-HSA-977443.3	25	-0.601989	-1.03788	0.445455	0.984961
UB-SPECIFIC PROCESSING PROTEASES REACTOME R-HSA-5689880.2	154	-0.474382	-1.0376	0.415307	0.985303
POSITIVE REGULATION OF DENDRITE DEVELOPMENT GOBP GO:1900006	35	-0.565472	-1.03741	0.437313	0.985316
NEGATIVE REGULATION OF G PROTEIN-COUPLED RECEPTOR SIGNALING PATHWAY GOBP GO:0045744	21	-0.609912	-1.0374	0.463722	0.984677
TISSUE MORPHOGENESIS GOBP GO:0048729	202	-0.468816	-1.03725	0.404819	0.984512
REGULATION OF TRANSCRIPTION BY RNA POLYMERASE I GOBP GO:0006356	32	-0.57361	-1.03725	0.43994	0.983842
RUNX2 REGULATES BONE DEVELOPMENT REACTOME R-HSA-8941326.1	24	-0.596562	-1.037	0.434191	0.984031
ODONTOGENESIS GOBP GO:0042476	35	-0.568069	-1.03683	0.448276	0.984034
LENS DEVELOPMENT IN CAMERA-TYPE EYE GOBP GO:0002088	17	-0.621007	-1.03679	0.460133	0.98351
REGULATION OF CELLULAR CARBOHYDRATE METABOLIC PROCESS GOBP GO:0010675	69	-0.510403	-1.03677	0.408276	0.982937
ORGANOPHOSPHATE BIOSYNTHETIC PROCESS GOBP GO:0090407	396	-0.443932	-1.03666	0.385635	0.982672
NEGATIVE REGULATION OF MITOTIC CELL CYCLE PHASE TRANSITION GOBP GO:1901991	177	-0.465548	-1.03657	0.37561	0.982329
MRNA 3'-END PROCESSING GOBP GO:0031124	77	-0.509978	-1.03656	0.415172	0.981693
GLUCOSE CATABOLIC PROCESS GOBP GO:0006007	25	-0.596394	-1.03613	0.453834	0.98261
POSTTRANSCRIPTIONAL REGULATION OF GENE EXPRESSION GOBP GO:0010608	391	-0.443916	-1.03606	0.376106	0.982178
GLYCOLYTIC PROCESS THROUGH FRUCTOSE-6-PHOSPHATE GOBP GO:0061615	24	-0.596712	-1.03595	0.443381	0.981937
BIOCARTA_G1_PATHWAY MSIGDB_C2 BIOCARTA_G1_PATHWAY	26	-0.596879	-1.03589	0.434312	0.981474
PYRIDINE NUCLEOTIDE BIOSYNTHETIC PROCESS GOBP GO:0019363	47	-0.539362	-1.03564	0.417683	0.981693
SIG_INSULIN_RECEPTOR_PATHWAY_IN_CARDIAC_MYOCYTES MSIGDB_C2 SIG_INSULIN_RECEPTOR_PATHWAY_IN_CARDIAC_MYOCYTES	44	-0.549741	-1.03524	0.417518	0.982499
REGULATION OF IGF ACTIVITY BY IGFBP REACTOME R-HSA-381426.2	76	-0.506224	-1.03452	0.409277	0.984355
LAMELLIPODIUM ORGANIZATION GOBP GO:0097581	23	-0.597509	-1.03426	0.457958	0.984678
1D-<I>MYO< I>-INOSITOL HEXAKISPHOSPHATE BIOSYNTHESIS II (MAMMALIAN) HUMANCYC PWY-6362	15	-0.636243	-1.03371	0.463866	0.985971
NADH METABOLIC PROCESS GOBP GO:0006734	32	-0.569291	-1.03346	0.436282	0.986284
PROCESS UTILIZING AUTOPHAGIC MECHANISM GOBP GO:0061919	162	-0.471355	-1.03284	0.411839	0.987794
REGULATION OF HEART RATE GOBP GO:0002027	42	-0.540497	-1.03265	0.44078	0.987843
NEGATIVE REGULATION OF MRNA PROCESSING GOBP GO:0050686	23	-0.595375	-1.03262	0.419614	0.98729
REGULATION OF LEUKOCYTE PROLIFERATION GOBP GO:0070663	81	-0.502772	-1.03218	0.433333	0.98819
PLASMA MEMBRANE ESTROGEN RECEPTOR SIGNALING PATHWAY INTERACTION DATABASE NCI-NATURE CURATED DATA PLASMA MEMBRANE ESTROGEN RECEPTOR SIGNALING	35	-0.556109	-1.03199	0.424886	0.988155
REGULATION OF HEMATOPOIETIC STEM CELL DIFFERENTIATION GOBP GO:1902036	60	-0.524641	-1.03197	0.424754	0.987586
POSITIVE REGULATION OF CELL ADHESION GOBP GO:0045785	198	-0.463177	-1.03161	0.413959	0.988188
INTERMEDIATE FILAMENT CYTOSKELETON ORGANIZATION GOBP GO:0045104	20	-0.6111	-1.03108	0.478469	0.989461
MITOCHONDRIAL CALCIUM ION TRANSPORT REACTOME DATABASE ID RELEASE 71 8949215	22	-0.594492	-1.03098	0.471229	0.989185
REGULATION OF LYMPHOCYTE PROLIFERATION GOBP GO:0050670	75	-0.504894	-1.03093	0.419805	0.988693
CA2+ PATHWAY REACTOME DATABASE ID RELEASE 71 4086398	45	-0.539272	-1.03084	0.4307	0.988359
DRUG TRANSPORT GOBP GO:0015893	60	-0.517931	-1.0308	0.402817	0.987844
POSITIVE REGULATION OF PROGRAMMED CELL DEATH GOBP GO:0043068	378	-0.443178	-1.03059	0.394475	0.987917
INTRAFLAGELLAR TRANSPORT PROTEINS BINDING TO DYNEIN WIKIPATHWAYS_20191210 WP4532 HOMO SAPIENS	26	-0.589	-1.03052	0.458894	0.98749
RESPONSE TO MISFOLDED PROTEIN GOBP GO:0051788	23	-0.592647	-1.03018	0.456628	0.988024
LYMPHOCYTE PROLIFERATION GOBP GO:0046651	17	-0.626993	-1.03012	0.46571	0.987567
REGULATION OF T CELL MEDIATED IMMUNITY GOBP GO:0002709	30	-0.568135	-1.03005	0.444976	0.987166
NCRNA METABOLIC PROCESS GOBP GO:0034660	441	-0.436787	-1.02995	0.3954	0.986855
DNA SYNTHESIS INVOLVED IN DNA REPAIR GOBP GO:0000731	45	-0.535178	-1.02986	0.425439	0.986517
DNA DUPLEX UNWINDING GOBP GO:0032508	47	-0.535428	-1.02985	0.415698	0.98589
TP53 REGULATES METABOLIC GENES REACTOME DATABASE ID RELEASE 71 5628897	73	-0.504019	-1.02976	0.413074	0.985541
SYNAPTIC SIGNALING PATHWAYS ASSOCIATED WITH AUTISM SPECTRUM DISORDER WIKIPATHWAYS_20191210 WP4539 HOMO SAPIENS	40	-0.544963	-1.02963	0.432229	0.985363
AUTOPHAGY GOBP GO:0006914	162	-0.471355	-1.0295	0.434406	0.985163
PID_INSULIN_GLUCOSE_PATHWAY MSIGDB_C2 PID_INSULIN_GLUCOSE_PATHWAY	20	-0.599397	-1.02901	0.461049	0.986243
MESODERM MORPHOGENESIS GOBP GO:0048332	19	-0.607372	-1.02873	0.455521	0.986583
LEARNING OR MEMORY GOBP GO:0007611	66	-0.516108	-1.02866	0.430199	0.986148
TISSUE REMODELING GOBP GO:0048771	33	-0.563178	-1.0286	0.440422	0.985692
EPITHELIAL CELL DEVELOPMENT GOBP GO:0002064	54	-0.519731	-1.02854	0.411683	0.985241
ENDOCYTOSIS GOBP GO:0006897	262	-0.453952	-1.02854	0.420561	0.984598
POSITIVE REGULATION OF B CELL PROLIFERATION GOBP GO:0030890	15	-0.626197	-1.02811	0.474832	0.985475
ADRENALINE,NORADRENALINE INHIBITS INSULIN SECRETION REACTOME R-HSA-400042.1	20	-0.616618	-1.02768	0.496013	0.986337
POSITIVE REGULATION OF PEPTIDE SECRETION GOBP GO:0002793	115	-0.483689	-1.02739	0.429319	0.98676
STRIATED MUSCLE CONTRACTION REACTOME DATABASE ID RELEASE 71 390522	15	-0.624168	-1.02641	0.477636	0.989562
RAB PROTEIN SIGNAL TRANSDUCTION GOBP GO:0032482	58	-0.51949	-1.0263	0.422594	0.989288
INTERFERON SIGNALING REACTOME R-HSA-913531.2	130	-0.474614	-1.026	0.425667	0.989694
ANATOMICAL STRUCTURE FORMATION INVOLVED IN MORPHOGENESIS GOBP GO:0048646	327	-0.446037	-1.026	0.411964	0.989057
POSITIVE REGULATION OF APOPTOTIC PROCESS GOBP GO:0043065	373	-0.44055	-1.02578	0.403135	0.98917
REGULATION OF MONONUCLEAR CELL PROLIFERATION GOBP GO:0032944	76	-0.504517	-1.02566	0.418792	0.988936
POSITIVE REGULATION OF MAP KINASE ACTIVITY GOBP GO:0043406	146	-0.468821	-1.02552	0.432727	0.988769
FOXO-MEDIATED TRANSCRIPTION OF CELL CYCLE GENES REACTOME DATABASE ID RELEASE 71 9617828	16	-0.620646	-1.02535	0.476346	0.988738
INTRA-GOLGI VESICLE-MEDIATED TRANSPORT GOBP GO:0006891	29	-0.57628	-1.02513	0.451761	0.988882
NICOTINAMIDE NUCLEOTIDE BIOSYNTHETIC PROCESS GOBP GO:0019359	47	-0.539362	-1.02467	0.448326	0.989868
NEGATIVE REGULATION OF GLIOGENESIS GOBP GO:0014014	15	-0.627312	-1.02431	0.479522	0.990529
FEMALE SEX DIFFERENTIATION GOBP GO:0046660	24	-0.589751	-1.02419	0.469419	0.990313
TNF ALPHA SIGNALING PATHWAY WIKIPATHWAYS_20191210 WP231 HOMO SAPIENS	85	-0.503469	-1.02379	0.407609	0.991104
RESPIRATORY SYSTEM DEVELOPMENT GOBP GO:0060541	40	-0.543689	-1.02364	0.439462	0.99096
TRAFFICKING OF AMPA RECEPTORS REACTOME R-HSA-399719.1	18	-0.606785	-1.02346	0.483051	0.990967
BIOCARTA_MITOCHONDRIA_PATHWAY MSIGDB_C2 BIOCARTA_MITOCHONDRIA_PATHWAY	19	-0.608763	-1.02344	0.472393	0.990388
GLUTAMATE BINDING, ACTIVATION OF AMPA RECEPTORS AND SYNAPTIC PLASTICITY REACTOME R-HSA-399721.2	18	-0.606785	-1.02273	0.469156	0.992301
NEGATIVE REGULATION OF PLASMA MEMBRANE BOUNDED CELL PROJECTION ASSEMBLY GOBP GO:0120033	17	-0.609283	-1.02265	0.466558	0.991926
HALLMARK_ADIPOGENESIS MSIGDB_C2 HALLMARK_ADIPOGENESIS	181	-0.457626	-1.02242	0.428916	0.992073
MULTI-ORGANISM REPRODUCTIVE PROCESS GOBP GO:0044703	202	-0.457099	-1.02232	0.429426	0.991761
EXTRINSIC APOPTOTIC SIGNALING PATHWAY IN ABSENCE OF LIGAND GOBP GO:0097192	18	-0.598666	-1.02217	0.457429	0.99165
NEGATIVE REGULATION OF CALCIUM ION TRANSPORT GOBP GO:0051926	21	-0.594296	-1.0221	0.463224	0.991252
SIGNALING BY RECEPTOR TYROSINE KINASES REACTOME DATABASE ID RELEASE 71 9006934	354	-0.442453	-1.02091	0.422907	0.994688
REGULATION OF SECRETION GOBP GO:0051046	341	-0.443072	-1.02084	0.418448	0.99429
MONOVALENT INORGANIC CATION HOMEOSTASIS GOBP GO:0055067	78	-0.502456	-1.02072	0.446694	0.994041
REGULATION OF DEPHOSPHORYLATION GOBP GO:0035303	113	-0.482876	-1.02069	0.446358	0.993498
CELLULAR MONOVALENT INORGANIC CATION HOMEOSTASIS GOBP GO:0030004	68	-0.510057	-1.0206	0.44206	0.99317
SEROTONIN RECEPTOR 2 AND ELK-SRF/GATA4 SIGNALING WIKIPATHWAYS_20191210 WP732 HOMO SAPIENS	17	-0.601276	-1.02043	0.466116	0.993156
DISEASES ASSOCIATED WITH O-GLYCOSYLATION OF PROTEINS REACTOME R-HSA-3906995.2	45	-0.541135	-1.02003	0.438849	0.993896
FC RECEPTOR SIGNALING PATHWAY GOBP GO:0038093	139	-0.469983	-1.0197	0.431274	0.994415
APOPTOTIC PROCESS GOBP GO:0006915	335	-0.439009	-1.01964	0.41752	0.993968
REGULATION OF PHOSPHATASE ACTIVITY GOBP GO:0010921	80	-0.498698	-1.01962	0.452414	0.993402
ASSOCIATION OF TRIC CCT WITH TARGET PROTEINS DURING BIOSYNTHESIS REACTOME DATABASE ID RELEASE 71 390471	37	-0.545083	-1.0195	0.460972	0.993183
RESPONSE TO NUTRIENT GOBP GO:0007584	42	-0.540005	-1.01944	0.455904	0.992703
POSITIVE REGULATION OF DEVELOPMENTAL GROWTH GOBP GO:0048639	53	-0.530148	-1.01916	0.453102	0.993024
REGULATION OF WNT SIGNALING PATHWAY GOBP GO:0030111	258	-0.444731	-1.0187	0.425484	0.993963
PID_ER_NONGENOMIC_PATHWAY MSIGDB_C2 PID_ER_NONGENOMIC_PATHWAY	35	-0.556109	-1.01862	0.471726	0.993578
PHOSPHATIDYLINOSITOL DEPHOSPHORYLATION GOBP GO:0046856	16	-0.61865	-1.01859	0.503175	0.993044
RESPONSE TO LIPID GOBP GO:0033993	278	-0.442938	-1.01782	0.433638	0.995069
SMALL CELL LUNG CANCER WIKIPATHWAYS_20191210 WP4658 HOMO SAPIENS	87	-0.486418	-1.01778	0.444904	0.994571
POSITIVE REGULATION OF CELL DEATH GOBP GO:0010942	404	-0.432822	-1.01768	0.440133	0.994285
POSITIVE REGULATION OF TYROSINE PHOSPHORYLATION OF STAT PROTEIN GOBP GO:0042531	32	-0.559595	-1.01671	0.452308	0.996964
PHOSPHOLIPID BIOSYNTHETIC PROCESS GOBP GO:0008654	182	-0.459382	-1.01653	0.442977	0.996944
TRANSCRIPTION OF E2F TARGETS UNDER NEGATIVE CONTROL BY DREAM COMPLEX REACTOME DATABASE ID RELEASE 71 1362277	19	-0.595351	-1.01616	0.487097	0.997564
NEGATIVE REGULATION OF TOLL-LIKE RECEPTOR SIGNALING PATHWAY GOBP GO:0034122	23	-0.586882	-1.01587	0.469256	0.997933
PROCESSING OF SMDT1 REACTOME R-HSA-8949664.1	15	-0.624653	-1.01557	0.500795	0.998348
TAT-MEDIATED ELONGATION OF THE HIV-1 TRANSCRIPT REACTOME DATABASE ID RELEASE 71 167246	42	-0.531714	-1.01546	0.449624	0.998104
PROTEIN EXPORT FROM NUCLEUS GOBP GO:0006611	129	-0.469323	-1.01546	0.445583	0.997472
NEGATIVE REGULATION OF ENDOCYTOSIS GOBP GO:0045806	39	-0.532705	-1.0146	0.45546	0.999763
CALCIUM SIGNALING IN THE CD4+ TCR PATHWAY PATHWAY INTERACTION DATABASE NCI-NATURE CURATED DATA CALCIUM SIGNALING IN THE CD4+ TCR PATHWAY	20	-0.596618	-1.01442	0.482704	0.999744
POSITIVE REGULATION OF ATPASE ACTIVITY GOBP GO:0032781	29	-0.566337	-1.01441	0.465224	0.999165
RNA POLYMERASE III TRANSCRIPTION INITIATION FROM TYPE 3 PROMOTER REACTOME R-HSA-76071.2	27	-0.568288	-1.01403	0.475831	0.999877
SUMOYLATION OF TRANSCRIPTION COFACTORS REACTOME R-HSA-3899300.3	38	-0.544049	-1.01381	0.464012	0.999988
BCR SIGNALING PATHWAY PATHWAY INTERACTION DATABASE NCI-NATURE CURATED DATA BCR SIGNALING PATHWAY	56	-0.515852	-1.01345	0.465418	1
BIOCARTA_NFAT_PATHWAY MSIGDB_C2 BIOCARTA_NFAT_PATHWAY	43	-0.526231	-1.01317	0.456036	1
BDNF-TRKB SIGNALING WIKIPATHWAYS_20191210 WP3676 HOMO SAPIENS	30	-0.561722	-1.01291	0.46851	1
PROTEIN MODIFICATION BY SMALL PROTEIN CONJUGATION GOBP GO:0032446	498	-0.428871	-1.01277	0.445757	1
VACUOLE ORGANIZATION GOBP GO:0007033	92	-0.492905	-1.01263	0.464865	1
MYELOID CELL DIFFERENTIATION GOBP GO:0030099	93	-0.487864	-1.01206	0.438719	1
REGULATION OF LYMPHOCYTE MEDIATED IMMUNITY GOBP GO:0002706	52	-0.516123	-1.01165	0.471671	1
IRON ION TRANSPORT GOBP GO:0006826	38	-0.544592	-1.01152	0.469449	1
RESOLUTION OF ABASIC SITES (AP SITES) REACTOME R-HSA-73933.1	36	-0.545402	-1.01143	0.461069	1
MEMORY GOBP GO:0007613	38	-0.535151	-1.01139	0.460641	1
INTEGRIN FAMILY CELL SURFACE INTERACTIONS PATHWAY INTERACTION DATABASE NCI-NATURE CURATED DATA INTEGRIN FAMILY CELL SURFACE INTERACTIONS	20	-0.594279	-1.01127	0.478405	1
TARGET OF RAPAMYCIN (TOR) SIGNALING WIKIPATHWAYS_20191210 WP1471 HOMO SAPIENS	33	-0.557348	-1.01084	0.472222	1
STRESS-ACTIVATED MAPK CASCADE GOBP GO:0051403	75	-0.502035	-1.01079	0.44884	1
CELL JUNCTION ORGANIZATION GOBP GO:0034330	133	-0.468552	-1.01044	0.459096	1
POSITIVE REGULATION OF PROTEIN SERINE/THREONINE KINASE ACTIVITY GOBP GO:0071902	186	-0.452611	-1.01019	0.44593	1
COENZYME METABOLIC PROCESS GOBP GO:0006732	226	-0.446907	-1.0096	0.460727	1
HOMEOSTASIS OF NUMBER OF CELLS GOBP GO:0048872	54	-0.513393	-1.00947	0.462518	1
SERINE FAMILY AMINO ACID METABOLIC PROCESS GOBP GO:0009069	27	-0.567133	-1.009	0.478593	1
ADENYLATE CYCLASE-MODULATING G PROTEIN-COUPLED RECEPTOR SIGNALING PATHWAY GOBP GO:0007188	73	-0.495333	-1.00892	0.450425	1
REGULATION OF MUSCLE SYSTEM PROCESS GOBP GO:0090257	97	-0.487208	-1.0088	0.455645	1
WATER-SOLUBLE VITAMIN METABOLIC PROCESS GOBP GO:0006767	61	-0.509223	-1.00867	0.45546	1
REGULATION OF ACTIN FILAMENT-BASED MOVEMENT GOBP GO:1903115	27	-0.569436	-1.00861	0.466459	1
REGULATION OF POLYSACCHARIDE BIOSYNTHETIC PROCESS GOBP GO:0032885	23	-0.584731	-1.00838	0.48068	1
ICOSANOID METABOLIC PROCESS GOBP GO:0006690	40	-0.532978	-1.0083	0.467863	1
TRANSMEMBRANE RECEPTOR PROTEIN TYROSINE KINASE SIGNALING PATHWAY GOBP GO:0007169	335	-0.437425	-1.00826	0.465986	1
WNT SIGNALING PATHWAY, PLANAR CELL POLARITY PATHWAY GOBP GO:0060071	77	-0.50124	-1.00812	0.456189	1
SYSTEM PROCESS GOBP GO:0003008	495	-0.425638	-1.0077	0.477152	1
VENTRICULAR CARDIAC MUSCLE TISSUE DEVELOPMENT GOBP GO:0003229	21	-0.583681	-1.00737	0.487844	1
REGULATION OF CELL CYCLE PHASE TRANSITION GOBP GO:1901987	359	-0.434129	-1.00735	0.451505	1
MITOCHONDRIAL ELECTRON TRANSPORT, CYTOCHROME C TO OXYGEN GOBP GO:0006123	15	-0.619866	-1.00729	0.504092	1
PID_CXCR3_PATHWAY MSIGDB_C2 PID_CXCR3_PATHWAY	34	-0.552175	-1.00675	0.482655	1
SIGNAL TRANSDUCTION IN ABSENCE OF LIGAND GOBP GO:0038034	18	-0.598666	-1.00635	0.486739	1
TRANSLESION SYNTHESIS GOBP GO:0019985	38	-0.542827	-1.00587	0.465046	1
FORMATION OF HIV ELONGATION COMPLEX IN THE ABSENCE OF HIV TAT REACTOME DATABASE ID RELEASE 71 167152	44	-0.531414	-1.00569	0.48949	1
REGULATION OF MRNA METABOLIC PROCESS GOBP GO:1903311	264	-0.435945	-1.00536	0.472941	1
ACTIVATION OF IMMUNE RESPONSE GOBP GO:0002253	288	-0.438982	-1.00487	0.475087	1
NEGATIVE REGULATION OF LIPID STORAGE GOBP GO:0010888	16	-0.607891	-1.00468	0.492635	1
POSITIVE REGULATION OF ERAD PATHWAY GOBP GO:1904294	15	-0.614678	-1.00457	0.486268	1
REGULATION OF PLASMA MEMBRANE BOUNDED CELL PROJECTION ORGANIZATION GOBP GO:0120035	380	-0.429533	-1.00445	0.468341	1
COPII-MEDIATED VESICLE TRANSPORT REACTOME DATABASE ID RELEASE 71 204005	61	-0.515399	-1.00443	0.471098	1
DETECTION OF STIMULUS INVOLVED IN SENSORY PERCEPTION GOBP GO:0050906	17	-0.606969	-1.00437	0.493464	1
REGULATION OF MICROTUBULE-BASED PROCESS GOBP GO:0032886	169	-0.457047	-1.00425	0.461153	1
NEGATIVE REGULATORS OF RIG-I MDA5 SIGNALING REACTOME DATABASE ID RELEASE 71 936440	32	-0.556677	-1.00419	0.48913	1
REGULATION OF MAST CELL ACTIVATION GOBP GO:0033003	20	-0.589418	-1.00399	0.510569	1
POSITIVE REGULATION OF GLUCOSE METABOLIC PROCESS GOBP GO:0010907	19	-0.592998	-1.00386	0.499218	1
REGULATION OF GLIOGENESIS GOBP GO:0014013	37	-0.535121	-1.00367	0.482655	1
BIOCARTA_NO1_PATHWAY MSIGDB_C2 BIOCARTA_NO1_PATHWAY	19	-0.594021	-1.0036	0.484663	1
REGULATION OF SECRETION BY CELL GOBP GO:1903530	326	-0.43484	-1.0035	0.464961	1
EGFR DOWNREGULATION REACTOME R-HSA-182971.6	24	-0.571042	-1.00347	0.494234	1
PROTEIN-DNA COMPLEX ASSEMBLY GOBP GO:0065004	118	-0.468847	-1.00337	0.451031	1
CELLULAR RESPONSE TO NERVE GROWTH FACTOR STIMULUS GOBP GO:1990090	16	-0.60349	-1.00331	0.504174	1
REGULATION OF ALPHA-BETA T CELL DIFFERENTIATION GOBP GO:0046637	28	-0.549726	-1.00323	0.465649	1
SUDDEN INFANT DEATH SYNDROME (SIDS) SUSCEPTIBILITY PATHWAYS WIKIPATHWAYS_20191210 WP706 HOMO SAPIENS	99	-0.482573	-1.00307	0.480211	1
PID_P38_MK2_PATHWAY MSIGDB_C2 PID_P38_MK2_PATHWAY	19	-0.590501	-1.00258	0.503864	1
REGULATION OF GLUCOSE TRANSMEMBRANE TRANSPORT GOBP GO:0010827	36	-0.548799	-1.0024	0.508902	1
PID_INTEGRIN_CS_PATHWAY MSIGDB_C2 PID_INTEGRIN_CS_PATHWAY	20	-0.594279	-1.00237	0.499176	1
PORPHYRIN-CONTAINING COMPOUND METABOLIC PROCESS GOBP GO:0006778	22	-0.577498	-1.00235	0.458937	1
KERATINIZATION GOBP GO:0031424	26	-0.561144	-1.00199	0.50625	1
INTEGRATION OF ENERGY METABOLISM REACTOME DATABASE ID RELEASE 71 163685	74	-0.495399	-1.00198	0.455662	1
SMALL GTPASE MEDIATED SIGNAL TRANSDUCTION GOBP GO:0007264	219	-0.443841	-1.00182	0.47929	1
RECRUITMENT AND ATM-MEDIATED PHOSPHORYLATION OF REPAIR AND SIGNALING PROTEINS AT DNA DOUBLE STRAND BREAKS REACTOME R-HSA-5693565.2	43	-0.526034	-1.00091	0.471861	1
PPARA ACTIVATES GENE EXPRESSION REACTOME R-HSA-1989781.3	100	-0.480988	-1.00065	0.487013	1
BIOCARTA_BCELLSURVIVAL_PATHWAY MSIGDB_C2 BIOCARTA_BCELLSURVIVAL_PATHWAY	15	-0.60864	-1.00039	0.514096	1
ACYL-COA BIOSYNTHETIC PROCESS GOBP GO:0071616	32	-0.544737	-0.999913	0.482026	1
NON-INTEGRIN MEMBRANE-ECM INTERACTIONS REACTOME R-HSA-3000171.2	39	-0.535899	-0.999911	0.471894	1
INFLAMMATORY RESPONSE PATHWAY WIKIPATHWAYS_20191210 WP453 HOMO SAPIENS	16	-0.606336	-0.99984	0.514331	1
GAMETE GENERATION GOBP GO:0007276	151	-0.457583	-0.999833	0.477556	1
REGULATION OF CANONICAL WNT SIGNALING PATHWAY GOBP GO:0060828	205	-0.441205	-0.999226	0.471535	1
REGULATION OF CELL PROJECTION ORGANIZATION GOBP GO:0031344	381	-0.428429	-0.998977	0.487859	1
PID_SYNDECAN_4_PATHWAY MSIGDB_C2 PID_SYNDECAN_4_PATHWAY	26	-0.555263	-0.998898	0.481538	1
PID_TCR_CALCIUM_PATHWAY MSIGDB_C2 PID_TCR_CALCIUM_PATHWAY	21	-0.580771	-0.998744	0.5	1
BIOCARTA_CTCF_PATHWAY MSIGDB_C2 BIOCARTA_CTCF_PATHWAY	19	-0.5865	-0.998289	0.491749	1
DNA DOUBLE STRAND BREAK RESPONSE REACTOME R-HSA-5693606.1	44	-0.525744	-0.998124	0.478955	1
CELLULAR RESPONSE TO OXYGEN-CONTAINING COMPOUND GOBP GO:1901701	474	-0.423388	-0.998045	0.494118	1
HIF-1-ALPHA TRANSCRIPTION FACTOR NETWORK PATHWAY INTERACTION DATABASE NCI-NATURE CURATED DATA HIF-1-ALPHA TRANSCRIPTION FACTOR NETWORK	57	-0.501189	-0.99792	0.466381	1
ALPHA 6 BETA 4 SIGNALING PATHWAY WIKIPATHWAYS_20191210 WP244 HOMO SAPIENS	33	-0.543264	-0.997775	0.480243	1
CELLULAR RESPONSE TO GLUCOSE STARVATION GOBP GO:0042149	31	-0.543713	-0.99775	0.494607	1
REGULATION OF LIPID METABOLISM BY PPARALPHA REACTOME DATABASE ID RELEASE 71 400206	101	-0.48035	-0.997533	0.472557	1
NON-CANONICAL WNT SIGNALING PATHWAY GOBP GO:0035567	100	-0.472371	-0.997136	0.488801	1
MITOCHONDRIAL PROTEIN IMPORT REACTOME DATABASE ID RELEASE 71 1268020	62	-0.496661	-0.996935	0.475138	1
INACTIVATION OF APC C VIA DIRECT INHIBITION OF THE APC C COMPLEX REACTOME R-HSA-141430.2	20	-0.580472	-0.99675	0.5	1
RESPONSE TO STEROL GOBP GO:0036314	16	-0.616072	-0.996354	0.517028	1
POSITIVE REGULATION OF CATABOLIC PROCESS GOBP GO:0009896	305	-0.428543	-0.995954	0.492571	1
CENTRAL NERVOUS SYSTEM NEURON DIFFERENTIATION GOBP GO:0021953	51	-0.51677	-0.995897	0.474359	1
REGULATION OF TRANSCRIPTION INITIATION FROM RNA POLYMERASE II PROMOTER GOBP GO:0060260	21	-0.585728	-0.99587	0.514803	1
NUCLEOTIDE-BINDING OLIGOMERIZATION DOMAIN (NOD) PATHWAY WIKIPATHWAYS_20191210 WP1433 HOMO SAPIENS	28	-0.554885	-0.995418	0.481947	1
SCF-DEPENDENT PROTEASOMAL UBIQUITIN-DEPENDENT PROTEIN CATABOLIC PROCESS GOBP GO:0031146	84	-0.488405	-0.995403	0.487145	1
ANIMAL ORGAN MORPHOGENESIS GOBP GO:0009887	319	-0.429187	-0.995339	0.492721	1
TRAF6 MEDIATED NF-KB ACTIVATION REACTOME R-HSA-933542.1	23	-0.576858	-0.995259	0.487342	1
NEGATIVE REGULATION OF TELOMERE MAINTENANCE VIA TELOMERE LENGTHENING GOBP GO:1904357	26	-0.560465	-0.994897	0.493002	1
THIOESTER BIOSYNTHETIC PROCESS GOBP GO:0035384	32	-0.544737	-0.994843	0.487539	1
EXTENSION OF TELOMERES REACTOME R-HSA-180786.1	29	-0.55731	-0.994734	0.484897	1
BIOCARTA_VEGF_PATHWAY MSIGDB_C2 BIOCARTA_VEGF_PATHWAY	23	-0.574287	-0.994499	0.530159	1
PROTEASOME-MEDIATED UBIQUITIN-DEPENDENT PROTEIN CATABOLIC PROCESS GOBP GO:0043161	281	-0.434371	-0.994209	0.5	1
PRIMARY NEURAL TUBE FORMATION GOBP GO:0014020	29	-0.547586	-0.993941	0.498466	1
HIV TRANSCRIPTION ELONGATION REACTOME DATABASE ID RELEASE 71 167169	42	-0.531714	-0.993652	0.475483	1
POSITIVE REGULATION OF ANION TRANSPORT GOBP GO:1903793	15	-0.622966	-0.993231	0.528846	1
SIGNAL TRANSDUCTION OF S1P RECEPTOR WIKIPATHWAYS_20191210 WP26 HOMO SAPIENS	22	-0.571532	-0.992696	0.504732	1
REGULATION OF CELLULAR AMIDE METABOLIC PROCESS GOBP GO:0034248	290	-0.429942	-0.992667	0.472727	1
POSITIVE REGULATION OF VIRAL LIFE CYCLE GOBP GO:1903902	47	-0.518309	-0.992622	0.48827	1
AMINO ACID METABOLISM WIKIPATHWAYS_20191210 WP3925 HOMO SAPIENS	69	-0.489232	-0.992513	0.484438	1
EXTRINSIC APOPTOTIC SIGNALING PATHWAY GOBP GO:0097191	60	-0.507253	-0.991963	0.473011	1
SIGNALING BY FGFR2 IIIA TM REACTOME DATABASE ID RELEASE 71 8851708	19	-0.584299	-0.991811	0.506536	1
P38 SIGNALING MEDIATED BY MAPKAP KINASES PATHWAY INTERACTION DATABASE NCI-NATURE CURATED DATA P38 SIGNALING MEDIATED BY MAPKAP KINASES	19	-0.590501	-0.991317	0.52381	1
TELOMERE MAINTENANCE VIA SEMI-CONSERVATIVE REPLICATION GOBP GO:0032201	25	-0.569726	-0.991247	0.481032	1
REGULATION OF ATP BIOSYNTHETIC PROCESS GOBP GO:2001169	68	-0.490925	-0.991236	0.495913	1
DDX58 IFIH1-MEDIATED INDUCTION OF INTERFERON-ALPHA BETA REACTOME R-HSA-168928.4	61	-0.501112	-0.991164	0.496423	1
REGULATION OF CELL GROWTH GOBP GO:0001558	234	-0.430354	-0.990594	0.492554	1
G ALPHA (I) SIGNALLING EVENTS REACTOME R-HSA-418594.5	167	-0.447978	-0.990343	0.478315	1
REGULATION OF LAMELLIPODIUM ORGANIZATION GOBP GO:1902743	29	-0.5482	-0.990281	0.510172	1
POSITIVE REGULATION OF JAK-STAT CASCADE GOBP GO:0046427	42	-0.530801	-0.990019	0.496988	1
POSITIVE REGULATION OF POTASSIUM ION TRANSPORT GOBP GO:0043268	22	-0.565841	-0.98985	0.515625	1
INTRINSIC APOPTOTIC SIGNALING PATHWAY IN RESPONSE TO DNA DAMAGE BY P53 CLASS MEDIATOR GOBP GO:0042771	18	-0.596124	-0.989757	0.5296	1
SIGNALING BY INTERLEUKINS REACTOME R-HSA-449147.11	320	-0.430355	-0.989556	0.513274	1
RESPONSE TO INTERFERON-GAMMA GOBP GO:0034341	57	-0.507818	-0.989453	0.511396	1
FORMATION OF HIV-1 ELONGATION COMPLEX CONTAINING HIV-1 TAT REACTOME DATABASE ID RELEASE 71 167200	42	-0.531714	-0.989126	0.518293	1
PID_FAS_PATHWAY MSIGDB_C2 PID_FAS_PATHWAY	33	-0.537173	-0.988759	0.509036	1
COMMON PATHWAYS UNDERLYING DRUG ADDICTION WIKIPATHWAYS_20191210 WP2636 HOMO SAPIENS	27	-0.559828	-0.988544	0.531981	1
DNA DEALKYLATION GOBP GO:0035510	17	-0.588414	-0.98853	0.508278	1
HALLMARK_INFLAMMATORY_RESPONSE MSIGDB_C2 HALLMARK_INFLAMMATORY_RESPONSE	125	-0.454649	-0.988052	0.502625	1
IMPORT INTO CELL GOBP GO:0098657	312	-0.428296	-0.987969	0.514806	1
NEGATIVE REGULATION OF PROTEIN KINASE B SIGNALING GOBP GO:0051898	30	-0.554437	-0.987739	0.510836	1
DAG AND IP3 SIGNALING REACTOME DATABASE ID RELEASE 71 1489509	30	-0.549414	-0.987695	0.521327	1
EARLY ENDOSOME TO LATE ENDOSOME TRANSPORT GOBP GO:0045022	20	-0.572359	-0.987529	0.508828	1
HALLMARK_ALLOGRAFT_REJECTION MSIGDB_C2 HALLMARK_ALLOGRAFT_REJECTION	101	-0.467144	-0.986431	0.503294	1
RETINA DEVELOPMENT IN CAMERA-TYPE EYE GOBP GO:0060041	32	-0.547612	-0.986383	0.537994	1
PCNA-DEPENDENT LONG PATCH BASE EXCISION REPAIR REACTOME DATABASE ID RELEASE 71 5651801	21	-0.573688	-0.986353	0.502416	1
PROCESSIVE SYNTHESIS ON THE LAGGING STRAND REACTOME R-HSA-69183.2	15	-0.595727	-0.98599	0.523256	1
WOUND HEALING GOBP GO:0042060	238	-0.432488	-0.98591	0.497685	1
NEGATIVE REGULATION OF LIPID LOCALIZATION GOBP GO:1905953	24	-0.565315	-0.985414	0.502362	1
SYNDECAN-4-MEDIATED SIGNALING EVENTS PATHWAY INTERACTION DATABASE NCI-NATURE CURATED DATA SYNDECAN-4-MEDIATED SIGNALING EVENTS	26	-0.555263	-0.985384	0.510769	1
BIOMINERAL TISSUE DEVELOPMENT GOBP GO:0031214	19	-0.571179	-0.985332	0.506579	1
DRUG TRANSMEMBRANE TRANSPORT GOBP GO:0006855	34	-0.539844	-0.98515	0.506912	1
PID_AJDISS_2PATHWAY MSIGDB_C2 PID_AJDISS_2PATHWAY	40	-0.527353	-0.985107	0.511144	1
SECOND-MESSENGER-MEDIATED SIGNALING GOBP GO:0019932	138	-0.455072	-0.985091	0.503098	1
MITOCHONDRIAL GENE EXPRESSION GOBP GO:0140053	134	-0.456191	-0.9849	0.498691	1
CYTOSOLIC SENSORS OF PATHOGEN-ASSOCIATED DNA REACTOME DATABASE ID RELEASE 71 1834949	58	-0.500489	-0.984782	0.506419	1
GOLGI TO PLASMA MEMBRANE TRANSPORT GOBP GO:0006893	48	-0.513278	-0.98468	0.494905	1
NONALCOHOLIC FATTY LIVER DISEASE WIKIPATHWAYS_20191210 WP4396 HOMO SAPIENS	129	-0.458072	-0.984668	0.50064	1
COFACTOR CATABOLIC PROCESS GOBP GO:0051187	28	-0.55234	-0.984611	0.527607	1
CELL ADHESION GOBP GO:0007155	369	-0.42336	-0.983695	0.527716	1
BASIGIN INTERACTIONS REACTOME R-HSA-210991.1	18	-0.584274	-0.983459	0.52188	1
TGF-BETA SIGNALING PATHWAY WIKIPATHWAYS_20191210 WP366 HOMO SAPIENS	127	-0.460304	-0.983314	0.505222	1
POSTTRANSLATIONAL REGULATION OF ADHERENS JUNCTION STABILITY AND DISSASSEMBLY PATHWAY INTERACTION DATABASE NCI-NATURE CURATED DATA POSTTRANSLATIONAL REGULATION OF ADHERENS JUNCTION STABILITY AND DISSASSEMBLY	40	-0.527353	-0.983083	0.514548	1
RESPONSE TO WOUNDING GOBP GO:0009611	264	-0.42489	-0.982866	0.525463	1
STEROID BIOSYNTHETIC PROCESS GOBP GO:0006694	70	-0.479538	-0.982462	0.507801	1
NAD METABOLIC PROCESS GOBP GO:0019674	55	-0.501003	-0.982432	0.507937	1
T CELL ACTIVATION GOBP GO:0042110	68	-0.485345	-0.98241	0.491322	1
PREFOLDIN MEDIATED TRANSFER OF SUBSTRATE TO CCT TRIC REACTOME R-HSA-389957.2	20	-0.577536	-0.981824	0.525	1
REGULATION OF BONE REMODELING GOBP GO:0046850	22	-0.566106	-0.981757	0.515498	1
CELLULAR RESPONSE TO LIGHT STIMULUS GOBP GO:0071482	69	-0.480133	-0.981647	0.490278	1
BEHAVIOR GOBP GO:0007610	121	-0.46198	-0.981595	0.509702	1
PROGRAMMED CELL DEATH GOBP GO:0012501	382	-0.42061	-0.981505	0.53348	1
G-PROTEIN BETA:GAMMA SIGNALLING REACTOME R-HSA-397795.3	22	-0.57241	-0.981485	0.540373	1
TRANSMEMBRANE RECEPTOR PROTEIN SERINE/THREONINE KINASE SIGNALING PATHWAY GOBP GO:0007178	116	-0.4629	-0.981485	0.525032	1
ENDOMETRIAL CANCER WIKIPATHWAYS_20191210 WP4155 HOMO SAPIENS	59	-0.49918	-0.981238	0.506401	1
PLASMA MEMBRANE BOUNDED CELL PROJECTION ASSEMBLY GOBP GO:0120031	313	-0.425386	-0.980957	0.531963	1
REGULATION OF ERAD PATHWAY GOBP GO:1904292	27	-0.550334	-0.980858	0.499259	1
SULFUR AMINO ACID METABOLIC PROCESS GOBP GO:0000096	28	-0.552028	-0.980697	0.519873	1
REGULATION OF CELL DEVELOPMENT GOBP GO:0060284	416	-0.416897	-0.980601	0.51036	1
BLOOD CIRCULATION GOBP GO:0008015	144	-0.451857	-0.980537	0.515451	1
PHENOL-CONTAINING COMPOUND METABOLIC PROCESS GOBP GO:0018958	19	-0.584035	-0.980318	0.523425	1
GLYCEROPHOSPHOLIPID METABOLIC PROCESS GOBP GO:0006650	230	-0.434112	-0.980147	0.51171	1
TELOMERE C-STRAND (LAGGING STRAND) SYNTHESIS REACTOME DATABASE ID RELEASE 71 174417	24	-0.554358	-0.980076	0.503145	1
STEROID METABOLIC PROCESS GOBP GO:0008202	100	-0.468029	-0.979481	0.511688	1
DEFECTIVE B3GAT3 CAUSES JDSSDHD REACTOME DATABASE ID RELEASE 71 3560801	17	-0.586654	-0.979201	0.509934	1
REGULATION OF MACROPHAGE DERIVED FOAM CELL DIFFERENTIATION GOBP GO:0010743	17	-0.590013	-0.979194	0.528939	1
T-CELL ANTIGEN RECEPTOR (TCR) PATHWAY DURING STAPHYLOCOCCUS AUREUS INFECTION WIKIPATHWAYS_20191210 WP3863 HOMO SAPIENS	39	-0.519234	-0.979184	0.516937	1
REGULATION OF ORGANELLE ASSEMBLY GOBP GO:1902115	158	-0.446393	-0.978951	0.508599	1
REGULATION OF CYTOPLASMIC AND NUCLEAR SMAD2 3 SIGNALING PATHWAY INTERACTION DATABASE NCI-NATURE CURATED DATA REGULATION OF CYTOPLASMIC AND NUCLEAR SMAD2 3 SIGNALING	19	-0.575848	-0.978865	0.51664	1
RESPONSE TO NERVE GROWTH FACTOR GOBP GO:1990089	16	-0.60349	-0.978615	0.546823	1
CAMP-MEDIATED SIGNALING GOBP GO:0019933	60	-0.494967	-0.978411	0.504237	1
PDGF SIGNALING PATHWAY PANTHER PATHWAY P00047	103	-0.467327	-0.978366	0.51751	1
RESPONSE TO INORGANIC SUBSTANCE GOBP GO:0010035	187	-0.439536	-0.97833	0.518563	1
NEGATIVE REGULATION OF NEURON DEATH GOBP GO:1901215	74	-0.485094	-0.978228	0.506868	1
DEFECTIVE B3GALT6 CAUSES EDSP2 AND SEMDJL1 REACTOME R-HSA-4420332.1	17	-0.586505	-0.977899	0.534314	1
CELL-CELL RECOGNITION GOBP GO:0009988	18	-0.588807	-0.977654	0.526917	1
COOPERATION OF PREFOLDIN AND TRIC CCT IN ACTIN AND TUBULIN FOLDING REACTOME R-HSA-389958.2	21	-0.572191	-0.97725	0.528662	1
REGULATION OF CELL MORPHOGENESIS GOBP GO:0022604	285	-0.426254	-0.97698	0.511287	1
CELL PROJECTION ASSEMBLY GOBP GO:0030031	326	-0.421137	-0.976814	0.513661	1
CELL DEATH GOBP GO:0008219	411	-0.416656	-0.976386	0.549727	1
TRNA PROCESSING IN THE NUCLEUS REACTOME DATABASE ID RELEASE 71 6784531	52	-0.495013	-0.976317	0.50655	1
INSULIN-MEDIATED GLUCOSE TRANSPORT PATHWAY INTERACTION DATABASE NCI-NATURE CURATED DATA INSULIN-MEDIATED GLUCOSE TRANSPORT	23	-0.556006	-0.976309	0.516279	1
INHIBITION OF THE PROTEOLYTIC ACTIVITY OF APC C REQUIRED FOR THE ONSET OF ANAPHASE BY MITOTIC SPINDLE CHECKPOINT COMPONENTS REACTOME DATABASE ID RELEASE 71 141405	20	-0.580472	-0.976108	0.547319	1
TOLL-LIKE RECEPTOR SIGNALING PATHWAY GOBP GO:0002224	69	-0.481057	-0.975878	0.502069	1
LIPID CATABOLIC PROCESS GOBP GO:0016042	127	-0.450258	-0.975875	0.522013	1
TNFALPHA IOB TNFALPHA	199	-0.437221	-0.975583	0.538922	1
DIGESTION GOBP GO:0007586	22	-0.560606	-0.97536	0.506431	1
RESPONSE TO STEROID HORMONE GOBP GO:0048545	86	-0.475806	-0.975315	0.525401	1
REGULATION OF ACTIN CYTOSKELETON REORGANIZATION GOBP GO:2000249	25	-0.557028	-0.974714	0.539308	1
FAS IOB FAS	107	-0.461722	-0.974684	0.522465	1
NEGATIVE REGULATION OF CELL-SUBSTRATE ADHESION GOBP GO:0010812	38	-0.5141	-0.974679	0.514925	1
CELLULAR RESPONSE TO LIPID GOBP GO:0071396	197	-0.438378	-0.974651	0.53911	1
HEXOSE METABOLIC PROCESS GOBP GO:0019318	78	-0.47572	-0.974312	0.516689	1
REGULATION OF SMOOTH MUSCLE CELL PROLIFERATION GOBP GO:0048660	60	-0.486143	-0.974024	0.523207	1
REGULATION OF PROTEIN SERINE/THREONINE KINASE ACTIVITY GOBP GO:0071900	316	-0.420537	-0.973845	0.550396	1
VITAMIN D RECEPTOR PATHWAY WIKIPATHWAYS_20191210 WP2877 HOMO SAPIENS	97	-0.464431	-0.973724	0.508587	1
REGULATION OF VIRAL LIFE CYCLE GOBP GO:1903900	95	-0.468251	-0.973484	0.5346	1
BIOLOGICAL ADHESION GOBP GO:0022610	375	-0.415264	-0.973177	0.558442	1
ANCHORING OF THE BASAL BODY TO THE PLASMA MEMBRANE REACTOME R-HSA-5620912.2	90	-0.470796	-0.973018	0.522727	1
UBIQUITIN-DEPENDENT PROTEIN CATABOLIC PROCESS GOBP GO:0006511	395	-0.415697	-0.972971	0.549234	1
CELL-MATRIX ADHESION GOBP GO:0007160	70	-0.480341	-0.972554	0.523224	1
AXON GUIDANCE MEDIATED BY NETRIN PANTHER PATHWAY P00009	27	-0.551048	-0.9722	0.531981	1
REGULATION OF ESTABLISHMENT OF PLANAR POLARITY GOBP GO:0090175	86	-0.472556	-0.972153	0.504098	1
PID_BCR_5PATHWAY MSIGDB_C2 PID_BCR_5PATHWAY	54	-0.498575	-0.97212	0.513361	1
REGULATION OF MRNA PROCESSING GOBP GO:0050684	113	-0.461169	-0.972017	0.526247	1
PID_HIF1_TFPATHWAY MSIGDB_C2 PID_HIF1_TFPATHWAY	57	-0.501189	-0.971896	0.531884	1
LAGGING STRAND SYNTHESIS REACTOME R-HSA-69186.2	20	-0.572852	-0.971758	0.53882	1
POSITIVE REGULATION OF MICROTUBULE POLYMERIZATION GOBP GO:0031116	23	-0.547403	-0.971428	0.517665	1
RENAL SYSTEM DEVELOPMENT GOBP GO:0072001	100	-0.461825	-0.970988	0.537869	1
ERYTHROCYTE DIFFERENTIATION GOBP GO:0030218	28	-0.533245	-0.970839	0.509346	1
PROTEASOMAL PROTEIN CATABOLIC PROCESS GOBP GO:0010498	302	-0.424038	-0.97079	0.548387	1
CIRCULATORY SYSTEM PROCESS GOBP GO:0003013	148	-0.451574	-0.970033	0.538559	1
POSITIVE REGULATION OF MICROTUBULE POLYMERIZATION OR DEPOLYMERIZATION GOBP GO:0031112	25	-0.544857	-0.970023	0.544304	1
KIDNEY DEVELOPMENT GOBP GO:0001822	97	-0.460389	-0.970013	0.515957	1
CELLULAR RESPONSE TO INSULIN STIMULUS GOBP GO:0032869	105	-0.461291	-0.969741	0.5466	1
NAD BIOSYNTHETIC PROCESS GOBP GO:0009435	42	-0.517736	-0.969252	0.532138	1
CELL-CELL ADHESION GOBP GO:0098609	202	-0.432848	-0.969134	0.54054	1
POTASSIUM CHANNELS REACTOME DATABASE ID RELEASE 71 1296071	44	-0.507339	-0.969036	0.515284	1
PROTEIN TRANSPORT WITHIN LIPID BILAYER GOBP GO:0032594	16	-0.595217	-0.96866	0.546493	1
TERMINATION OF TRANSLESION DNA SYNTHESIS REACTOME DATABASE ID RELEASE 71 5656169	30	-0.528136	-0.968578	0.527692	1
S1P1 PATHWAY PATHWAY INTERACTION DATABASE NCI-NATURE CURATED DATA S1P1 PATHWAY	16	-0.587435	-0.968182	0.557724	1
CILIARY BASAL BODY-PLASMA MEMBRANE DOCKING GOBP GO:0097711	90	-0.457492	-0.967717	0.517781	1
REGULATION OF GENERATION OF PRECURSOR METABOLITES AND ENERGY GOBP GO:0043467	105	-0.462077	-0.967711	0.537662	1
POSITIVE REGULATION OF CYTOKINE BIOSYNTHETIC PROCESS GOBP GO:0042108	24	-0.554085	-0.967637	0.517997	1
ORGANELLE DISASSEMBLY GOBP GO:1903008	57	-0.490821	-0.967425	0.529661	1
GLYCOSYL COMPOUND METABOLIC PROCESS GOBP GO:1901657	75	-0.477304	-0.967232	0.514785	1
REGULATION OF PROTEASOMAL PROTEIN CATABOLIC PROCESS GOBP GO:0061136	135	-0.441208	-0.967086	0.548346	1
VXPX CARGO-TARGETING TO CILIUM REACTOME R-HSA-5620916.1	17	-0.580493	-0.966687	0.54201	1
POSITIVE REGULATION OF SODIUM ION TRANSPORT GOBP GO:0010765	18	-0.573078	-0.966638	0.553542	1
PHOSPHOLIPID DEPHOSPHORYLATION GOBP GO:0046839	17	-0.582833	-0.966467	0.552632	1
CYTOKINE-MEDIATED SIGNALING PATHWAY GOBP GO:0019221	380	-0.413909	-0.966239	0.578366	1
ACTIVATION OF MAPKK ACTIVITY GOBP GO:0000186	27	-0.542396	-0.96623	0.536434	1
RHO PROTEIN SIGNAL TRANSDUCTION GOBP GO:0007266	59	-0.489273	-0.966209	0.526611	1
CLASS B 2 (SECRETIN FAMILY RECEPTORS) REACTOME R-HSA-373080.2	45	-0.502185	-0.966061	0.536797	1
CARBOHYDRATE CATABOLIC PROCESS GOBP GO:0016052	74	-0.472834	-0.966028	0.521108	1
SIGNALING BY MET REACTOME R-HSA-6806834.2	56	-0.489631	-0.965819	0.544139	1
FORMATION OF PRIMARY GERM LAYER GOBP GO:0001704	50	-0.492022	-0.965738	0.517647	1
CELLULAR RESPONSE TO TOPOLOGICALLY INCORRECT PROTEIN GOBP GO:0035967	119	-0.449916	-0.965534	0.539141	1
DEFECTIVE B4GALT7 CAUSES EDS, PROGEROID TYPE REACTOME R-HSA-3560783.1	17	-0.586229	-0.965427	0.564516	1
PNAT PANTHER PATHWAY P05912	33	-0.528907	-0.965031	0.546282	1
PROTEIN-PROTEIN INTERACTIONS AT SYNAPSES REACTOME DATABASE ID RELEASE 71 6794362	55	-0.495672	-0.964931	0.554922	1
MAINTENANCE OF CELL NUMBER GOBP GO:0098727	52	-0.495899	-0.964887	0.538462	1
NEGATIVE REGULATION OF MACROAUTOPHAGY GOBP GO:0016242	21	-0.557163	-0.964282	0.552632	1
POSITIVE REGULATION OF HORMONE SECRETION GOBP GO:0046887	40	-0.511923	-0.964274	0.548686	1
GLYCOLYSIS REACTOME DATABASE ID RELEASE 71 70171	57	-0.484098	-0.963935	0.535608	1
METABOLISM OF FAT-SOLUBLE VITAMINS REACTOME DATABASE ID RELEASE 71 6806667	27	-0.540712	-0.963275	0.528594	1
REGULATION OF CELL CYCLE G1/S PHASE TRANSITION GOBP GO:1902806	128	-0.446331	-0.963091	0.551365	1
CELL CYCLE, MITOTIC REACTOME DATABASE ID RELEASE 71 69278	436	-0.406643	-0.962916	0.584499	1
KERATINIZATION REACTOME DATABASE ID RELEASE 71 6805567	26	-0.541626	-0.962598	0.5375	1
APOPTOTIC FACTOR-MEDIATED RESPONSE REACTOME DATABASE ID RELEASE 71 111471	16	-0.594272	-0.962341	0.576412	1
FATTY ACID BIOSYNTHETIC PROCESS GOBP GO:0006633	52	-0.489817	-0.962227	0.530086	1
ATM PATHWAY PATHWAY INTERACTION DATABASE NCI-NATURE CURATED DATA ATM PATHWAY	34	-0.517449	-0.961573	0.543675	1
POLYOL CATABOLIC PROCESS GOBP GO:0046174	15	-0.596126	-0.961469	0.56689	1
MODIFICATION-DEPENDENT PROTEIN CATABOLIC PROCESS GOBP GO:0019941	399	-0.409019	-0.961432	0.58587	1
STEM CELL POPULATION MAINTENANCE GOBP GO:0019827	52	-0.495899	-0.961385	0.525926	1
NEGATIVE REGULATION OF STRESS-ACTIVATED MAPK CASCADE GOBP GO:0032873	32	-0.523768	-0.961017	0.547945	1
POSITIVE REGULATION OF POTASSIUM ION TRANSMEMBRANE TRANSPORT GOBP GO:1901381	19	-0.568617	-0.960888	0.549249	1
DIGESTIVE SYSTEM PROCESS GOBP GO:0022600	19	-0.578194	-0.960524	0.576923	1
DEVELOPMENT OF PRIMARY FEMALE SEXUAL CHARACTERISTICS GOBP GO:0046545	22	-0.559697	-0.960426	0.561667	1
VESICLE TARGETING GOBP GO:0006903	77	-0.473503	-0.959648	0.563786	1
HEPARAN SULFATE PROTEOGLYCAN BIOSYNTHETIC PROCESS GOBP GO:0015012	15	-0.584336	-0.959455	0.562197	1
MOLECULES ASSOCIATED WITH ELASTIC FIBRES REACTOME DATABASE ID RELEASE 71 2129379	27	-0.545191	-0.959132	0.550077	1
GASTRULATION GOBP GO:0007369	59	-0.488812	-0.959105	0.533803	1
GLUCOCORTICOID RECEPTOR REGULATORY NETWORK PATHWAY INTERACTION DATABASE NCI-NATURE CURATED DATA GLUCOCORTICOID RECEPTOR REGULATORY NETWORK	55	-0.486558	-0.958996	0.554455	1
REGULATION OF LIPID LOCALIZATION GOBP GO:1905952	70	-0.47118	-0.958909	0.558266	1
REGULATION OF CELL-SUBSTRATE ADHESION GOBP GO:0010810	118	-0.446393	-0.958855	0.52774	1
TRANSLESION SYNTHESIS BY Y FAMILY DNA POLYMERASES BYPASSES LESIONS ON DNA TEMPLATE REACTOME DATABASE ID RELEASE 71 110313	37	-0.516068	-0.958651	0.533632	1
RESPONSE TO EPIDERMAL GROWTH FACTOR GOBP GO:0070849	25	-0.547053	-0.958599	0.559578	1
O-GLYCOSYLATION OF TSR DOMAIN-CONTAINING PROTEINS REACTOME R-HSA-5173214.1	29	-0.53104	-0.958296	0.552147	1
REGULATION OF BLOOD PRESSURE GOBP GO:0008217	60	-0.484893	-0.958256	0.551049	1
IFN-ALPHA IOB IFN-ALPHA	29	-0.534371	-0.958135	0.527607	1
CELL CYCLE DNA REPLICATION GOBP GO:0044786	41	-0.513421	-0.958119	0.539143	1
BIOCARTA_P38MAPK_PATHWAY MSIGDB_C2 BIOCARTA_P38MAPK_PATHWAY	38	-0.510977	-0.957575	0.538574	1
PID_ATM_PATHWAY MSIGDB_C2 PID_ATM_PATHWAY	34	-0.517449	-0.957566	0.547655	1
CORNIFICATION GOBP GO:0070268	25	-0.548057	-0.957169	0.574103	1
ER-NUCLEUS SIGNALING PATHWAY GOBP GO:0006984	30	-0.532813	-0.957004	0.552395	1
CELLULAR RESPONSE TO NUTRIENT GOBP GO:0031670	24	-0.550828	-0.956212	0.565287	1
SIGNALING BY NOTCH3 REACTOME R-HSA-9012852.2	39	-0.514101	-0.955427	0.554734	1
REGULATION OF T CELL MIGRATION GOBP GO:2000404	19	-0.558592	-0.955045	0.549085	1
PROTEIN DEPHOSPHORYLATION GOBP GO:0006470	109	-0.452458	-0.954997	0.541114	1
POSITIVE REGULATION OF CARBOHYDRATE METABOLIC PROCESS GOBP GO:0045913	44	-0.50136	-0.954299	0.543192	1
MULTICELLULAR ORGANISMAL HOMEOSTASIS GOBP GO:0048871	111	-0.450451	-0.954131	0.564409	1
CARGO TRAFFICKING TO THE PERICILIARY MEMBRANE REACTOME R-HSA-5620920.2	45	-0.502558	-0.953943	0.559758	1
CD209 (DC-SIGN) SIGNALING REACTOME R-HSA-5621575.1	17	-0.573915	-0.953485	0.577181	1
ORGANIC HYDROXY COMPOUND TRANSPORT GOBP GO:0015850	54	-0.485034	-0.953399	0.534307	1
GLYCEROPHOSPHOLIPID BIOSYNTHETIC PROCESS GOBP GO:0046474	165	-0.43607	-0.953257	0.564634	1
PROTEIN-CONTAINING COMPLEX DISASSEMBLY GOBP GO:0032984	204	-0.424587	-0.953189	0.565114	1
PYRIDINE-CONTAINING COMPOUND METABOLIC PROCESS GOBP GO:0072524	84	-0.46339	-0.953024	0.548564	1
GUANOSINE-CONTAINING COMPOUND METABOLIC PROCESS GOBP GO:1901068	24	-0.540444	-0.952609	0.552756	1
POSITIVE REGULATION OF GTPASE ACTIVITY GOBP GO:0043547	128	-0.441394	-0.95239	0.57199	1
REGULATION OF PROTEIN CATABOLIC PROCESS GOBP GO:0042176	268	-0.415371	-0.952388	0.590389	1
PID_PTP1B_PATHWAY MSIGDB_C2 PID_PTP1B_PATHWAY	37	-0.511457	-0.951511	0.564963	1
REGULATION OF PRODUCTION OF MOLECULAR MEDIATOR OF IMMUNE RESPONSE GOBP GO:0002700	57	-0.482961	-0.95118	0.561972	1
VITAMIN A AND CAROTENOID METABOLISM WIKIPATHWAYS_20191210 WP716 HOMO SAPIENS	21	-0.553482	-0.951159	0.553125	1
MEMBRANE LIPID CATABOLIC PROCESS GOBP GO:0046466	21	-0.562984	-0.95096	0.559561	1
RESPONSE TO ORGANONITROGEN COMPOUND GOBP GO:0010243	410	-0.407422	-0.950833	0.622247	1
NEPHROTIC SYNDROME WIKIPATHWAYS_20191210 WP4758 HOMO SAPIENS	34	-0.520861	-0.95064	0.560606	1
GLYCEROLIPID BIOSYNTHETIC PROCESS GOBP GO:0045017	171	-0.430051	-0.950562	0.568238	1
FEMALE GONAD DEVELOPMENT GOBP GO:0008585	21	-0.563004	-0.949594	0.572347	1
MODIFIED AMINO ACID TRANSPORT GOBP GO:0072337	15	-0.586816	-0.949283	0.571659	1
BIOCARTA_PAR1_PATHWAY MSIGDB_C2 BIOCARTA_PAR1_PATHWAY	29	-0.527567	-0.948957	0.569823	1
REGULATION OF STEM CELL DIFFERENTIATION GOBP GO:2000736	87	-0.460185	-0.948759	0.555256	1
DEFENSE RESPONSE GOBP GO:0006952	348	-0.408239	-0.948298	0.611487	1
UROGENITAL SYSTEM DEVELOPMENT GOBP GO:0001655	106	-0.455241	-0.948166	0.573925	1
METABOLIC DISORDERS OF BIOLOGICAL OXIDATION ENZYMES REACTOME R-HSA-5579029.2	21	-0.55174	-0.948151	0.558588	1
DEUBIQUITINATION REACTOME R-HSA-5688426.3	224	-0.424953	-0.947992	0.596244	1
CIRCADIAN RHYTHM GOBP GO:0007623	82	-0.458495	-0.947788	0.573925	1
RESPONSE TO HYDROGEN PEROXIDE GOBP GO:0042542	45	-0.493362	-0.94754	0.568543	1
BLOOD COAGULATION GOBP GO:0007596	164	-0.428823	-0.947428	0.575377	1
TGF_BETA_RECEPTOR NETPATH TGF_BETA_RECEPTOR	207	-0.420225	-0.947186	0.597122	1
REGULATION OF LIPID METABOLIC PROCESS GOBP GO:0019216	248	-0.417074	-0.94703	0.58783	1
CELLULAR RESPONSE TO EPIDERMAL GROWTH FACTOR STIMULUS GOBP GO:0071364	22	-0.550985	-0.946873	0.563944	1
DEFECTIVE B3GALTL CAUSES PETERS-PLUS SYNDROME (PPS) REACTOME DATABASE ID RELEASE 71 5083635	28	-0.532224	-0.946547	0.555725	1
HEMOSTASIS GOBP GO:0007599	167	-0.427288	-0.946358	0.569782	1
REGULATION OF T CELL PROLIFERATION GOBP GO:0042129	53	-0.484271	-0.946236	0.553977	1
CARDIAC VENTRICLE DEVELOPMENT GOBP GO:0003231	50	-0.493075	-0.946208	0.548817	1
MONOSACCHARIDE METABOLIC PROCESS GOBP GO:0005996	98	-0.445828	-0.945807	0.566796	1
PID_SYNDECAN_2_PATHWAY MSIGDB_C2 PID_SYNDECAN_2_PATHWAY	29	-0.523778	-0.945756	0.548338	1
IL6 NETPATH IL6	75	-0.465486	-0.945738	0.561104	1
MITOCHONDRIAL CALCIUM ION HOMEOSTASIS GOBP GO:0051560	17	-0.577497	-0.945668	0.56406	1
INNATE IMMUNE RESPONSE GOBP GO:0045087	167	-0.431655	-0.945611	0.578182	1
RESOLUTION OF AP SITES VIA THE MULTIPLE-NUCLEOTIDE PATCH REPLACEMENT PATHWAY REACTOME DATABASE ID RELEASE 71 110373	25	-0.5367	-0.945351	0.581903	1
KERATAN SULFATE KERATIN METABOLISM REACTOME R-HSA-1638074.1	26	-0.531226	-0.945214	0.548183	1
NEGATIVE REGULATION OF PHOSPHATASE ACTIVITY GOBP GO:0010923	60	-0.474772	-0.945172	0.588571	1
N-CADHERIN SIGNALING EVENTS PATHWAY INTERACTION DATABASE NCI-NATURE CURATED DATA N-CADHERIN SIGNALING EVENTS	33	-0.512387	-0.945156	0.558912	1
KERATAN SULFATE METABOLIC PROCESS GOBP GO:0042339	26	-0.536195	-0.944468	0.558642	1
PID_BETA_CATENIN_DEG_PATHWAY MSIGDB_C2 PID_BETA_CATENIN_DEG_PATHWAY	16	-0.575892	-0.944359	0.584	1
NEGATIVE REGULATION OF STRESS-ACTIVATED PROTEIN KINASE SIGNALING CASCADE GOBP GO:0070303	32	-0.523768	-0.94403	0.559399	1
IMMUNE RESPONSE-ACTIVATING CELL SURFACE RECEPTOR SIGNALING PATHWAY GOBP GO:0002429	186	-0.427057	-0.94394	0.59854	1
HEAD DEVELOPMENT GOBP GO:0060322	238	-0.414917	-0.943879	0.617169	1
PID_FGF_PATHWAY MSIGDB_C2 PID_FGF_PATHWAY	44	-0.501509	-0.943789	0.580692	1
REGULATION OF T CELL CYTOKINE PRODUCTION GOBP GO:0002724	17	-0.559288	-0.94325	0.581281	1
FOXO-MEDIATED TRANSCRIPTION OF OXIDATIVE STRESS, METABOLIC AND NEURONAL GENES REACTOME R-HSA-9615017.1	21	-0.555379	-0.943151	0.585875	1
ANTIGEN RECEPTOR-MEDIATED SIGNALING PATHWAY GOBP GO:0050851	118	-0.445617	-0.943035	0.609536	1
INTRINSIC APOPTOTIC SIGNALING PATHWAY IN RESPONSE TO DNA DAMAGE GOBP GO:0008630	43	-0.497712	-0.942496	0.578788	1
TRANSPORT OF MATURE TRANSCRIPT TO CYTOPLASM REACTOME DATABASE ID RELEASE 71 72202	74	-0.459342	-0.942432	0.572603	1
MRNA PROCESSING GOBP GO:0006397	325	-0.40673	-0.9418	0.636054	1
REGULATION OF PURINE NUCLEOTIDE METABOLIC PROCESS GOBP GO:1900542	91	-0.4507	-0.941169	0.572802	1
HALLMARK_IL2_STAT5_SIGNALING MSIGDB_C2 HALLMARK_IL2_STAT5_SIGNALING	152	-0.432734	-0.941112	0.594796	1
METABOLISM OF VITAMINS AND COFACTORS REACTOME DATABASE ID RELEASE 71 196854	139	-0.425168	-0.940876	0.594148	1
REGULATION OF POTASSIUM ION TRANSPORT GOBP GO:0043266	45	-0.490462	-0.940835	0.563953	1
PID_NCADHERIN_PATHWAY MSIGDB_C2 PID_NCADHERIN_PATHWAY	30	-0.516942	-0.940798	0.592275	1
DRUG CATABOLIC PROCESS GOBP GO:0042737	54	-0.482986	-0.940552	0.579096	1
PRIMARY ALCOHOL METABOLIC PROCESS GOBP GO:0034308	25	-0.535941	-0.940345	0.592965	1
POSITIVE REGULATION OF GLIOGENESIS GOBP GO:0014015	21	-0.546919	-0.940234	0.570048	1
PROTEIN N-LINKED GLYCOSYLATION VIA ASPARAGINE GOBP GO:0018279	26	-0.527479	-0.939978	0.581144	1
POSITIVE REGULATION OF CYTOKINE PRODUCTION GOBP GO:0001819	214	-0.416649	-0.939225	0.619855	1
REGULATION OF SODIUM ION TRANSPORT GOBP GO:0002028	46	-0.489924	-0.939129	0.574184	1
DEATH RECEPTOR SIGNALLING REACTOME R-HSA-73887.4	114	-0.44046	-0.939085	0.603093	1
REGULATION OF CARDIAC MUSCLE CELL CONTRACTION GOBP GO:0086004	26	-0.531775	-0.938689	0.564669	1
REGULATION OF MICROTUBULE CYTOSKELETON ORGANIZATION GOBP GO:0070507	145	-0.426273	-0.938386	0.594859	1
RNA POLYADENYLATION GOBP GO:0043631	26	-0.532819	-0.93814	0.584235	1
NEGATIVE REGULATION OF VIRAL GENOME REPLICATION GOBP GO:0045071	32	-0.523084	-0.937903	0.60155	1
MRNA POLYADENYLATION GOBP GO:0006378	24	-0.537844	-0.937866	0.586039	1
T CELL RECEPTOR SIGNALING PATHWAY GOBP GO:0050852	107	-0.443832	-0.937857	0.579921	1
POSITIVE REGULATION OF CELL-SUBSTRATE ADHESION GOBP GO:0010811	57	-0.479276	-0.937804	0.572872	1
RESPONSE TO ORGANIC CYCLIC COMPOUND GOBP GO:0014070	234	-0.414519	-0.937639	0.621247	1
T-CELL ANTIGEN RECEPTOR (TCR) SIGNALING PATHWAY WIKIPATHWAYS_20191210 WP69 HOMO SAPIENS	60	-0.473017	-0.937359	0.577035	1
ALZHEIMERS DISEASE WIKIPATHWAYS_20191210 WP2059 HOMO SAPIENS	62	-0.469594	-0.937307	0.565789	1
RAS PROTEIN SIGNAL TRANSDUCTION GOBP GO:0007265	190	-0.421169	-0.937236	0.625146	1
PHASE I - FUNCTIONALIZATION OF COMPOUNDS REACTOME R-HSA-211945.5	45	-0.489484	-0.93713	0.583704	1
PID_REG_GR_PATHWAY MSIGDB_C2 PID_REG_GR_PATHWAY	55	-0.486558	-0.937126	0.594517	1
CARDIOVASCULAR SYSTEM DEVELOPMENT GOBP GO:0072358	201	-0.419132	-0.936896	0.619339	1
MODIFICATION-DEPENDENT MACROMOLECULE CATABOLIC PROCESS GOBP GO:0043632	410	-0.402966	-0.936891	0.675468	1
POSITIVE REGULATION OF CALCIUM ION TRANSMEMBRANE TRANSPORTER ACTIVITY GOBP GO:1901021	19	-0.547779	-0.936516	0.585443	1
POSITIVE REGULATION OF NEURON PROJECTION DEVELOPMENT GOBP GO:0010976	135	-0.435919	-0.936199	0.594595	1
POSTTRANSCRIPTIONAL GENE SILENCING GOBP GO:0016441	48	-0.48388	-0.936082	0.571429	1
NUCLEOSIDE METABOLIC PROCESS GOBP GO:0009116	61	-0.473301	-0.935821	0.58237	1
PROTEIN AUTOPHOSPHORYLATION GOBP GO:0046777	135	-0.438616	-0.935793	0.616858	1
POSITIVE REGULATION OF CELLULAR CATABOLIC PROCESS GOBP GO:0031331	266	-0.411231	-0.935458	0.640411	1
EGFR1 NETPATH EGFR1	421	-0.395611	-0.935038	0.644951	1
ESTABLISHMENT OF SPINDLE LOCALIZATION GOBP GO:0051293	35	-0.508868	-0.93489	0.579259	1
CERAMIDE SIGNALING PATHWAY PATHWAY INTERACTION DATABASE NCI-NATURE CURATED DATA CERAMIDE SIGNALING PATHWAY	39	-0.500728	-0.934709	0.58806	1
COAGULATION GOBP GO:0050817	164	-0.428823	-0.934425	0.61227	1
PEPTIDYL-ASPARAGINE MODIFICATION GOBP GO:0018196	27	-0.520288	-0.934089	0.594044	1
MORPHOGENESIS OF AN EPITHELIUM GOBP GO:0002009	150	-0.427457	-0.93407	0.607187	1
GLAND MORPHOGENESIS GOBP GO:0022612	18	-0.548246	-0.933803	0.586151	1
VASCULATURE DEVELOPMENT GOBP GO:0001944	197	-0.421922	-0.93336	0.635697	1
PHOTORECEPTOR CELL MAINTENANCE GOBP GO:0045494	15	-0.573977	-0.933312	0.589701	1
GLYCEROLIPID METABOLIC PROCESS GOBP GO:0046486	258	-0.405246	-0.932919	0.642691	1
NICOTINE PHARMACODYNAMICS PATHWAY PANTHER PATHWAY P06587	15	-0.572761	-0.932856	0.594595	1
NUCLEOTIDE BIOSYNTHETIC PROCESS GOBP GO:0009165	169	-0.419062	-0.93269	0.623932	1
HIV INFECTION REACTOME DATABASE ID RELEASE 71 162906	205	-0.416727	-0.932649	0.633293	1
PROTEIN LOCALIZATION TO CELL PERIPHERY GOBP GO:1990778	152	-0.428874	-0.932476	0.622665	1
REGULATION OF ACTION POTENTIAL GOBP GO:0098900	34	-0.505843	-0.931958	0.591928	1
MEMBRANE PROTEIN INTRACELLULAR DOMAIN PROTEOLYSIS GOBP GO:0031293	18	-0.560436	-0.93113	0.593081	1
NEGATIVE REGULATION OF NEURON APOPTOTIC PROCESS GOBP GO:0043524	51	-0.481043	-0.931091	0.610145	1
FEMALE GAMETE GENERATION GOBP GO:0007292	28	-0.515715	-0.931018	0.585843	1
PID_SMAD2_3PATHWAY MSIGDB_C2 PID_SMAD2_3PATHWAY	17	-0.56113	-0.93075	0.585526	1
PROTEIN QUALITY CONTROL FOR MISFOLDED OR INCOMPLETELY SYNTHESIZED PROTEINS GOBP GO:0006515	26	-0.52884	-0.930681	0.589342	1
REGULATION OF DNA BIOSYNTHETIC PROCESS GOBP GO:2000278	94	-0.447067	-0.930462	0.612686	1
CELLULAR CALCIUM ION HOMEOSTASIS GOBP GO:0006874	180	-0.416997	-0.930328	0.626238	1
POSITIVE REGULATION OF ALPHA-BETA T CELL DIFFERENTIATION GOBP GO:0046638	19	-0.554133	-0.930076	0.590698	1
CELL COMMUNICATION INVOLVED IN CARDIAC CONDUCTION GOBP GO:0086065	25	-0.52988	-0.929858	0.590476	1
ENDOCHONDRAL OSSIFICATION WIKIPATHWAYS_20191210 WP474 HOMO SAPIENS	49	-0.48407	-0.929585	0.586705	1
SREBF AND MIR33 IN CHOLESTEROL AND LIPID HOMEOSTASIS WIKIPATHWAYS_20191210 WP2011 HOMO SAPIENS	15	-0.569599	-0.929301	0.600346	1
FOXO-MEDIATED TRANSCRIPTION REACTOME R-HSA-9614085.2	54	-0.479292	-0.929183	0.578431	1
DIVALENT INORGANIC CATION HOMEOSTASIS GOBP GO:0072507	199	-0.417297	-0.929016	0.624553	1
NEGATIVE REGULATION OF DEPHOSPHORYLATION GOBP GO:0035305	68	-0.468836	-0.928874	0.605594	1
DNA DAMAGE BYPASS REACTOME R-HSA-73893.1	46	-0.486166	-0.928726	0.584527	1
TETRAPYRROLE METABOLIC PROCESS GOBP GO:0033013	35	-0.505833	-0.928701	0.571656	1
PID_CXCR4_PATHWAY MSIGDB_C2 PID_CXCR4_PATHWAY	76	-0.454674	-0.928454	0.575172	1
EYE DEVELOPMENT GOBP GO:0001654	103	-0.444285	-0.927263	0.619551	1
IMMUNE RESPONSE-REGULATING CELL SURFACE RECEPTOR SIGNALING PATHWAY GOBP GO:0002768	205	-0.412307	-0.927259	0.632775	1
RNA SPLICING, VIA TRANSESTERIFICATION REACTIONS GOBP GO:0000375	269	-0.404808	-0.926874	0.666667	1
MRNA SPLICING, VIA SPLICEOSOME GOBP GO:0000398	266	-0.40372	-0.926662	0.645342	1
PATHWAYS IN CLEAR CELL RENAL CELL CARCINOMA WIKIPATHWAYS_20191210 WP4018 HOMO SAPIENS	74	-0.451168	-0.926574	0.576662	1
RHO GTPASES ACTIVATE ROCKS REACTOME DATABASE ID RELEASE 71 5627117	18	-0.542393	-0.926225	0.570579	1
VISUAL SYSTEM DEVELOPMENT GOBP GO:0150063	104	-0.439034	-0.926083	0.608866	1
POSTTRANSCRIPTIONAL GENE SILENCING BY RNA GOBP GO:0035194	47	-0.484072	-0.925994	0.58997	1
SIGNALING BY FGFR IN DISEASE REACTOME R-HSA-1226099.4	47	-0.476064	-0.92593	0.584683	1
PANCREAS DEVELOPMENT GOBP GO:0031016	17	-0.554088	-0.925917	0.586047	1
EPITHELIAL CELL DIFFERENTIATION GOBP GO:0030855	198	-0.415732	-0.925833	0.649877	1
REGULATION OF TYROSINE PHOSPHORYLATION OF STAT PROTEIN GOBP GO:0042509	40	-0.497144	-0.925799	0.598174	1
SIGNALING EVENTS MEDIATED BY PTP1B PATHWAY INTERACTION DATABASE NCI-NATURE CURATED DATA SIGNALING EVENTS MEDIATED BY PTP1B	37	-0.511457	-0.925339	0.599402	1
REGULATION OF INTERLEUKIN-6 PRODUCTION GOBP GO:0032675	57	-0.468885	-0.925174	0.595376	1
CELLULAR PROTEIN CATABOLIC PROCESS GOBP GO:0044257	473	-0.391035	-0.925144	0.705309	1
BIOCARTA_TOLL_PATHWAY MSIGDB_C2 BIOCARTA_TOLL_PATHWAY	31	-0.511349	-0.92484	0.602782	1
NEGATIVE REGULATION OF CELL PROLIFERATION GOBP GO:0008285	327	-0.395801	-0.924265	0.686431	1
REGULATION OF JAK-STAT CASCADE GOBP GO:0046425	60	-0.469515	-0.92419	0.569817	1
REGULATION OF COMPLEMENT CASCADE REACTOME DATABASE ID RELEASE 71 977606	21	-0.527886	-0.92378	0.598695	1
POSITIVE REGULATION OF CELL DEVELOPMENT GOBP GO:0010720	234	-0.407675	-0.92363	0.647597	1
POSITIVE REGULATION OF MAPK CASCADE GOBP GO:0043410	272	-0.405774	-0.923257	0.642361	1
DISEASES ASSOCIATED WITH THE TLR SIGNALING CASCADE REACTOME DATABASE ID RELEASE 71 5602358	17	-0.549078	-0.923135	0.589085	1
MAINTENANCE OF PROTEIN LOCATION IN NUCLEUS GOBP GO:0051457	20	-0.544548	-0.923132	0.602848	1
REGULATION OF STEM CELL POPULATION MAINTENANCE GOBP GO:2000036	17	-0.565932	-0.922707	0.60469	1
REGULATION OF MUSCLE CELL DIFFERENTIATION GOBP GO:0051147	79	-0.452926	-0.922544	0.611732	1
PROTEIN DEUBIQUITINATION GOBP GO:0016579	226	-0.412184	-0.921846	0.674365	1
REGULATION OF CELLULAR PROTEIN CATABOLIC PROCESS GOBP GO:1903362	185	-0.414214	-0.921384	0.636253	1
ION HOMEOSTASIS GOBP GO:0050801	370	-0.39502	-0.921279	0.679162	1
VITAMIN B12 METABOLISM WIKIPATHWAYS_20191210 WP1533 HOMO SAPIENS	27	-0.523343	-0.921076	0.601276	1
CYTOSOLIC DNA-SENSING PATHWAY WIKIPATHWAYS_20191210 WP4655 HOMO SAPIENS	49	-0.483067	-0.920939	0.603774	1
TRNA METHYLATION GOBP GO:0030488	29	-0.513807	-0.920735	0.583841	1
POSITIVE REGULATION OF PROTEIN TRANSPORT GOBP GO:0051222	226	-0.408715	-0.920723	0.664303	1
REGULATION OF T CELL RECEPTOR SIGNALING PATHWAY GOBP GO:0050856	17	-0.542704	-0.920473	0.620355	1
CELLULAR CHEMICAL HOMEOSTASIS GOBP GO:0055082	345	-0.397866	-0.920154	0.679558	1
RIBOSE PHOSPHATE BIOSYNTHETIC PROCESS GOBP GO:0046390	132	-0.426896	-0.920131	0.619231	1
HIPPO-YAP SIGNALING PATHWAY WIKIPATHWAYS_20191210 WP4537 HOMO SAPIENS	21	-0.533328	-0.919747	0.606742	1
EGFR1 IOB EGFR1	410	-0.39165	-0.919737	0.707317	1
BETA3 INTEGRIN CELL SURFACE INTERACTIONS PATHWAY INTERACTION DATABASE NCI-NATURE CURATED DATA BETA3 INTEGRIN CELL SURFACE INTERACTIONS	33	-0.501149	-0.919683	0.599379	1
DETOXIFICATION OF REACTIVE OXYGEN SPECIES REACTOME DATABASE ID RELEASE 71 3299685	26	-0.513386	-0.918892	0.584733	1
[truncated: 1,362 more rows]
