# Supplementary material for: Multi-omic analysis of bat versus human fibroblasts reveals altered central metabolism
Source: eLife. 2024 Jul 22;13:e94007. doi: 10.7554/eLife.94007 (PMC11262796; doi:10.7554/eLife.94007)
Supplement: Supplementary file 3. — GSEA was performed on the transcriptomics data using (PI) value as a metric. The table below lists the pathways detected as upregulated in WI-38 cells (compared to PaLung cells) and associated enrichment metrics. [file elife-94007-supp3.xlsx]

## Sheet: Index
Title	Multi-omic analysis of bat versus human fibroblasts reveals altered central metabolism
Authors	N. Suhas Jagannathan, Javier Yu Peng Koh, Younghwan Lee, Radoslaw M Sobota, Aaron Irving, Lin-Fa Wang, Yoko Itahana, Koji Itahana, Lisa Tucker-Kellogg
Supplementary Table No.	Supplementary Table 3
Supplementary Table Title	Biological pathways upregulated in WI-38 cells from Gene Set Enrichment Analysis of Transcriptomics data
Description	GSEA was performed on the Transcriptomics data using PI value as a metric. The table below lists the pathways detected as upregulated in WI-38 cells (compared to PaLung cells) and associated enrichment metrics
Column header	Contents
NAME	Name of Gene Set/Pathway
SIZE	Number of genes in gene set/pathway
ES	Enrichment Score from GSEA
NES	Normalized enrichment score from GSEA
NOM p-val	p value computed from GSEA
FDR q-val	FDR corrected p-values obtained from GSEA

## Sheet: Supp_Table_3_GSEA_Transcriptomi
NAME	SIZE	ES	NES	NOM p-val	FDR q-val
NEGATIVE REGULATION OF OSSIFICATION GOBP GO:0030279	34	0.846655	1.74517	0	0.56899
REGULATION OF DNA REPLICATION GOBP GO:0006275	77	0.739835	1.74331	0	0.296777
NEGATIVE REGULATION OF BLOOD COAGULATION GOBP GO:0030195	23	0.873569	1.68183	0	0.89671
PID_SYNDECAN_1_PATHWAY MSIGDB_C2 PID_SYNDECAN_1_PATHWAY	34	0.826932	1.6809	0	0.685151
SKELETAL SYSTEM MORPHOGENESIS GOBP GO:0048705	67	0.74595	1.67977	0	0.559455
ENDOCHONDRAL BONE MORPHOGENESIS GOBP GO:0060350	24	0.865071	1.67062	0	0.563977
NEGATIVE REGULATION OF COAGULATION GOBP GO:0050819	25	0.85886	1.66195	0	0.575334
NEGATIVE REGULATION OF HEMOSTASIS GOBP GO:1900047	23	0.873569	1.66132	0.00269542	0.508786
BIOCARTA_KERATINOCYTE_PATHWAY MSIGDB_C2 BIOCARTA_KERATINOCYTE_PATHWAY	39	0.793632	1.64329	0.00294985	0.642583
ARYL HYDROCARBON RECEPTOR PATHWAY WIKIPATHWAYS_20191210 WP2873 HOMO SAPIENS	28	0.822001	1.64054	0.00543478	0.609789
BETA5 BETA6 BETA7 AND BETA8 INTEGRIN CELL SURFACE INTERACTIONS PATHWAY INTERACTION DATABASE NCI-NATURE CURATED DATA BETA5 BETA6 BETA7 AND BETA8 INTEGRIN CELL SURFACE INTERACTIONS	16	0.902598	1.63819	0.005291	0.581946
DNA DAMAGE TELOMERE STRESS INDUCED SENESCENCE REACTOME DATABASE ID RELEASE 71 2559586	36	0.796963	1.63588	0.00310559	0.558041
REGULATION OF NEUROLOGICAL SYSTEM PROCESS GOBP GO:0031644	43	0.757347	1.6294	0.00628931	0.580246
TRANSCRIPTIONAL REGULATION OF GRANULOPOIESIS REACTOME R-HSA-9616222.2	30	0.824121	1.62339	0.00549451	0.60176
SYNDECAN-1-MEDIATED SIGNALING EVENTS PATHWAY INTERACTION DATABASE NCI-NATURE CURATED DATA SYNDECAN-1-MEDIATED SIGNALING EVENTS	26	0.828414	1.61955	0.00849858	0.601931
APOPTOSIS-RELATED NETWORK DUE TO ALTERED NOTCH3 IN OVARIAN CANCER WIKIPATHWAYS_20191210 WP2864 HOMO SAPIENS	50	0.737818	1.61146	0.0102389	0.648241
NEGATIVE REGULATION OF WOUND HEALING GOBP GO:0061045	35	0.796173	1.60845	0.0060241	0.642687
CARTILAGE DEVELOPMENT INVOLVED IN ENDOCHONDRAL BONE MORPHOGENESIS GOBP GO:0060351	15	0.895449	1.60725	0	0.618337
SIMPLIFIED INTERACTION MAP BETWEEN LOXL4 AND OXIDATIVE STRESS PATHWAY WIKIPATHWAYS_20191210 WP3670 HOMO SAPIENS	17	0.876782	1.60591	0.0134048	0.598677
BONE MORPHOGENESIS GOBP GO:0060349	37	0.795501	1.59605	0.0056338	0.669527
PROTEIN LOCALIZATION TO VACUOLE GOBP GO:0072665	47	0.733305	1.59238	0.0103093	0.676991
PID_INTEGRIN5_PATHWAY MSIGDB_C2 PID_INTEGRIN5_PATHWAY	16	0.902598	1.59201	0	0.650018
TRIGLYCERIDE METABOLISM REACTOME DATABASE ID RELEASE 71 8979227	22	0.839921	1.58924	0.0028169	0.650257
NEGATIVE REGULATION OF EPITHELIAL CELL APOPTOTIC PROCESS GOBP GO:1904036	25	0.818407	1.5878	0.0195531	0.636977
BIOCARTA_PPARA_PATHWAY MSIGDB_C2 BIOCARTA_PPARA_PATHWAY	40	0.752811	1.58401	0.0157233	0.649262
ID NETPATH ID	28	0.815055	1.58006	0.0026455	0.661618
BARD1 SIGNALING EVENTS PATHWAY INTERACTION DATABASE NCI-NATURE CURATED DATA BARD1 SIGNALING EVENTS	28	0.807944	1.5767	0.0117994	0.671493
ID IOB ID	19	0.850144	1.57049	0.015625	0.706185
PARKINSONS DISEASE PATHWAY WIKIPATHWAYS_20191210 WP2371 HOMO SAPIENS	31	0.789092	1.56487	0.0115274	0.739028
PID_BARD1_PATHWAY MSIGDB_C2 PID_BARD1_PATHWAY	29	0.812785	1.56054	0.00806452	0.759027
ENDOCHONDRAL BONE GROWTH GOBP GO:0003416	16	0.874405	1.55845	0.0128866	0.754858
REGULATION OF EPITHELIAL CELL APOPTOTIC PROCESS GOBP GO:1904035	40	0.747472	1.55615	0.00623053	0.754785
BIOCARTA_EGF_PATHWAY MSIGDB_C2 BIOCARTA_EGF_PATHWAY	26	0.799413	1.55589	0.0131926	0.73464
REGULATION OF OSSIFICATION GOBP GO:0030278	96	0.647623	1.55582	0.00796813	0.71372
COLLAGEN CHAIN TRIMERIZATION REACTOME R-HSA-8948216.2	28	0.794054	1.55444	0.0114943	0.706378
REGULATION OF PROTEIN EXPORT FROM NUCLEUS GOBP GO:0046825	29	0.770535	1.55382	0.0351351	0.692696
NABA_COLLAGENS MSIGDB_C2 NABA_COLLAGENS	28	0.794054	1.55337	0.0169492	0.677507
POSITIVE REGULATION OF DNA REPLICATION GOBP GO:0045740	22	0.822428	1.55213	0.0221607	0.670883
PROTEIN LOCALIZATION TO LYSOSOME GOBP GO:0061462	27	0.808843	1.55179	0.0136986	0.656482
NEGATIVE REGULATION OF PROTEIN DEPHOSPHORYLATION GOBP GO:0035308	25	0.785182	1.54682	0.0151515	0.683764
EMBRYONIC HEART TUBE MORPHOGENESIS GOBP GO:0003143	27	0.790133	1.54608	0.0174927	0.6735
COLLAGEN METABOLIC PROCESS GOBP GO:0032963	34	0.752547	1.54589	0.0317003	0.659309
ECTODERM DIFFERENTIATION WIKIPATHWAYS_20191210 WP2858 HOMO SAPIENS	103	0.627786	1.54446	0	0.655165
BIOCARTA_BAD_PATHWAY MSIGDB_C2 BIOCARTA_BAD_PATHWAY	20	0.827128	1.54401	0.0189702	0.64425
REGULATION OF ENDOTHELIAL CELL APOPTOTIC PROCESS GOBP GO:2000351	29	0.778072	1.53861	0.015873	0.674142
BIOCARTA_TEL_PATHWAY MSIGDB_C2 BIOCARTA_TEL_PATHWAY	17	0.855357	1.53263	0.0194444	0.710273
HEART LOOPING GOBP GO:0001947	24	0.797339	1.53189	0.0265487	0.701257
EMBRYONIC HEART TUBE DEVELOPMENT GOBP GO:0035050	29	0.782247	1.53003	0.0204678	0.701985
NEGATIVE REGULATION OF MITOCHONDRION ORGANIZATION GOBP GO:0010823	28	0.778757	1.52827	0.0182371	0.701163
BONE GROWTH GOBP GO:0098868	18	0.851992	1.52454	0.0128205	0.718814
RMTS METHYLATE HISTONE ARGININES REACTOME DATABASE ID RELEASE 71 3214858	33	0.754472	1.51906	0.017094	0.751296
PRE-NOTCH TRANSCRIPTION AND TRANSLATION REACTOME DATABASE ID RELEASE 71 1912408	37	0.727163	1.51857	0.0142857	0.740873
NEGATIVE REGULATION OF PHOSPHOPROTEIN PHOSPHATASE ACTIVITY GOBP GO:0032515	18	0.839113	1.5155	0.0275482	0.75247
DETERMINATION OF HEART LEFT/RIGHT ASYMMETRY GOBP GO:0061371	25	0.797233	1.51438	0.0177515	0.748003
POSITIVE REGULATION OF SMOOTHENED SIGNALING PATHWAY GOBP GO:0045880	18	0.822688	1.51394	0.0329949	0.738179
ESTROGEN-DEPENDENT NUCLEAR EVENTS DOWNSTREAM OF ESR-MEMBRANE SIGNALING REACTOME DATABASE ID RELEASE 71 9634638	20	0.803033	1.51389	0.0106383	0.72546
POSITIVE REGULATION OF NEUROLOGICAL SYSTEM PROCESS GOBP GO:0031646	20	0.814106	1.51221	0.026455	0.727221
NEGATIVE REGULATION OF RESPONSE TO WOUNDING GOBP GO:1903035	42	0.701781	1.51078	0.0124611	0.727323
SIRT1 NEGATIVELY REGULATES RRNA EXPRESSION REACTOME R-HSA-427359.2	15	0.85864	1.50827	0.0298913	0.736255
PID_DNA_PK_PATHWAY MSIGDB_C2 PID_DNA_PK_PATHWAY	15	0.84822	1.5073	0.0235602	0.732272
REGULATION OF MORPHOGENESIS OF A BRANCHING STRUCTURE GOBP GO:0060688	19	0.825652	1.50487	0.0279188	0.739415
ARYL HYDROCARBON RECEPTOR NETPATH WIKIPATHWAYS_20191210 WP2586 HOMO SAPIENS	37	0.731254	1.50322	0.0268657	0.740446
REGULATION OF OSTEOBLAST DIFFERENTIATION GOBP GO:0045667	60	0.665545	1.50043	0.0124224	0.752298
NEGATIVE REGULATION OF ENDOTHELIAL CELL APOPTOTIC PROCESS GOBP GO:2000352	19	0.827078	1.49537	0.0214477	0.782401
MITOTIC PROPHASE REACTOME DATABASE ID RELEASE 71 68875	76	0.645359	1.49518	0.0101695	0.771647
FORMATION OF THE BETA-CATENIN:TCF TRANSACTIVATING COMPLEX REACTOME DATABASE ID RELEASE 71 201722	34	0.736087	1.49411	0.0263158	0.768604
CONDENSATION OF PROPHASE CHROMOSOMES REACTOME R-HSA-2299718.1	18	0.821781	1.49321	0.0421053	0.763932
TRIGLYCERIDE CATABOLISM REACTOME R-HSA-163560.3	15	0.854727	1.48993	0.034398	0.780148
O-GLYCAN PROCESSING GOBP GO:0016266	34	0.735224	1.48977	0.0176471	0.770071
REGULATION OF SKELETAL MUSCLE TISSUE DEVELOPMENT GOBP GO:0048641	17	0.831655	1.48753	0.026178	0.777067
RESPONSE TO FATTY ACID GOBP GO:0070542	17	0.834576	1.48567	0.0351351	0.781291
MYOBLAST DIFFERENTIATION GOBP GO:0045445	21	0.816352	1.48449	0.01983	0.780381
VIRAL GENOME REPLICATION GOBP GO:0019079	20	0.800469	1.482	0.0379404	0.789858
POSITIVE REGULATION OF OSTEOBLAST DIFFERENTIATION GOBP GO:0045669	33	0.72526	1.47834	0.041791	0.808862
POSITIVE REGULATION OF RESPONSE TO BIOTIC STIMULUS GOBP GO:0002833	25	0.758204	1.47587	0.0478873	0.817927
MODULATION BY HOST OF SYMBIONT TRANSCRIPTION GOBP GO:0052472	22	0.774426	1.47359	0.0437158	0.825565
PI3K/AKT/MTOR - VITD3 SIGNALLING WIKIPATHWAYS_20191210 WP4141 HOMO SAPIENS	17	0.813891	1.47284	0.0352304	0.820747
HISTONE MODIFICATIONS WIKIPATHWAYS_20191210 WP2369 HOMO SAPIENS	38	0.698562	1.47225	0.0372493	0.814993
HIPPOCAMPUS DEVELOPMENT GOBP GO:0021766	15	0.849678	1.47205	0.0451306	0.806357
O-LINKED GLYCOSYLATION OF MUCINS REACTOME R-HSA-913709.3	36	0.724217	1.47019	0.0451613	0.810455
NEF-MEDIATES DOWN MODULATION OF CELL SURFACE RECEPTORS BY RECRUITING THEM TO CLATHRIN ADAPTERS REACTOME R-HSA-164938.1	15	0.819227	1.46653	0.046798	0.829841
NEURAL CREST CELL MIGRATION DURING DEVELOPMENT WIKIPATHWAYS_20191210 WP4564 HOMO SAPIENS	29	0.739111	1.46582	0.0357143	0.825614
EMBRYONIC ORGAN DEVELOPMENT GOBP GO:0048568	122	0.587058	1.46359	0.00790514	0.83328
REGULATION OF CELLULAR RESPONSE TO OXIDATIVE STRESS GOBP GO:1900407	44	0.682132	1.46209	0.041543	0.834949
MODULATION OF TRANSCRIPTION IN OTHER ORGANISM INVOLVED IN SYMBIOTIC INTERACTION GOBP GO:0052312	22	0.774426	1.45988	0.0308989	0.841681
PYRIMIDINE-CONTAINING COMPOUND METABOLIC PROCESS GOBP GO:0072527	53	0.663452	1.45822	0.0326797	0.844952
PRE-NOTCH EXPRESSION AND PROCESSING REACTOME R-HSA-1912422.1	51	0.669698	1.45455	0.0273556	0.864196
COLLAGEN CATABOLIC PROCESS GOBP GO:0030574	23	0.772493	1.45421	0.0391645	0.857143
FOXM1 TRANSCRIPTION FACTOR NETWORK PATHWAY INTERACTION DATABASE NCI-NATURE CURATED DATA FOXM1 TRANSCRIPTION FACTOR NETWORK	37	0.712259	1.45301	0.0240964	0.856329
PROTEIN O-LINKED GLYCOSYLATION GOBP GO:0006493	79	0.622775	1.45137	0.0114068	0.859503
REGULATION OF NEUTROPHIL CHEMOTAXIS GOBP GO:0090022	19	0.784611	1.4506	0.0407125	0.856599
RECOGNITION AND ASSOCIATION OF DNA GLYCOSYLASE WITH SITE CONTAINING AN AFFECTED PURINE REACTOME DATABASE ID RELEASE 71 110330	15	0.830192	1.45048	0.05	0.848252
HALLMARK_INTERFERON_ALPHA_RESPONSE MSIGDB_C2 HALLMARK_INTERFERON_ALPHA_RESPONSE	75	0.62239	1.45024	0.0248227	0.840761
THE ROLE OF NEF IN HIV-1 REPLICATION AND DISEASE PATHOGENESIS REACTOME R-HSA-164952.1	19	0.791479	1.44829	0.0563003	0.84594
DIGESTIVE SYSTEM DEVELOPMENT GOBP GO:0055123	37	0.694482	1.44684	0.0470219	0.848308
ST_JNK_MAPK_PATHWAY MSIGDB_C2 ST_JNK_MAPK_PATHWAY	39	0.700175	1.44632	0.0543131	0.843817
MODULATION BY HOST OF VIRAL TRANSCRIPTION GOBP GO:0043921	22	0.774426	1.4459	0.0594901	0.838505
VEGFR3 SIGNALING IN LYMPHATIC ENDOTHELIUM PATHWAY INTERACTION DATABASE NCI-NATURE CURATED DATA VEGFR3 SIGNALING IN LYMPHATIC ENDOTHELIUM	24	0.753444	1.44438	0.0533708	0.841392
NEGATIVE REGULATION OF ESTABLISHMENT OF PROTEIN LOCALIZATION GOBP GO:1904950	92	0.599216	1.4438	0.0172414	0.837046
DEPURINATION REACTOME R-HSA-73927.1	15	0.830192	1.44289	0.0511509	0.835268
PROTEIN LOCALIZATION TO CELL SURFACE GOBP GO:0034394	21	0.789674	1.44274	0.0696517	0.828023
NEGATIVE REGULATION OF CATABOLIC PROCESS GOBP GO:0009895	202	0.545446	1.44251	0	0.821423
PID_LYMPH_ANGIOGENESIS_PATHWAY MSIGDB_C2 PID_LYMPH_ANGIOGENESIS_PATHWAY	24	0.753444	1.44119	0.0447368	0.822983
NEGATIVE REGULATION OF UBIQUITIN-PROTEIN TRANSFERASE ACTIVITY GOBP GO:0051444	15	0.813809	1.44051	0.0503979	0.820154
REGULATION OF INTERFERON-GAMMA-MEDIATED SIGNALING PATHWAY GOBP GO:0060334	18	0.766285	1.43985	0.0601093	0.816975
BRANCHED-CHAIN AMINO ACID CATABOLIC PROCESS GOBP GO:0009083	21	0.753181	1.43698	0.0672043	0.829796
DIGESTIVE TRACT DEVELOPMENT GOBP GO:0048565	37	0.694482	1.43631	0.0401146	0.826739
NEGATIVE REGULATION OF CHROMATIN ORGANIZATION GOBP GO:1905268	39	0.683237	1.43561	0.0352941	0.823987
PHOTODYNAMIC THERAPY-INDUCED AP-1 SURVIVAL SIGNALING. WIKIPATHWAYS_20191210 WP3611 HOMO SAPIENS	44	0.668087	1.43531	0.03125	0.818528
CELLULAR RESPONSE TO ALCOHOL GOBP GO:0097306	36	0.691943	1.43526	0.042735	0.811534
REGULATION OF NEUROTRANSMITTER RECEPTOR ACTIVITY GOBP GO:0099601	27	0.734571	1.4336	0.0612245	0.815894
REGULATION OF MITOCHONDRION ORGANIZATION GOBP GO:0010821	140	0.564737	1.43334	0.00537634	0.810526
CLEAVAGE OF THE DAMAGED PURINE REACTOME R-HSA-110331.2	15	0.830192	1.43223	0.0436893	0.811065
RESPONSE TO ELEVATED PLATELET CYTOSOLIC CA2+ REACTOME R-HSA-76005.2	94	0.588393	1.42554	0.0289855	0.85097
BIOCARTA_P53HYPOXIA_PATHWAY MSIGDB_C2 BIOCARTA_P53HYPOXIA_PATHWAY	22	0.735042	1.42551	0.0466321	0.843785
EMBRYONIC APPENDAGE MORPHOGENESIS GOBP GO:0035113	29	0.725076	1.42368	0.0833333	0.849593
POSITIVE REGULATION OF MORPHOGENESIS OF AN EPITHELIUM GOBP GO:1905332	18	0.793908	1.42329	0.0564103	0.844897
SIGNALING BY ERBB2 IN CANCER REACTOME R-HSA-1227990.1	17	0.791593	1.42118	0.0683544	0.852562
NEGATIVE REGULATION OF CYCLIN-DEPENDENT PROTEIN KINASE ACTIVITY GOBP GO:1904030	20	0.754536	1.42107	0.0687679	0.846248
PREIMPLANTATION EMBRYO WIKIPATHWAYS_20191210 WP3527 HOMO SAPIENS	29	0.710423	1.4205	0.059322	0.843294
BIOCARTA_MCM_PATHWAY MSIGDB_C2 BIOCARTA_MCM_PATHWAY	18	0.793191	1.41972	0.0527704	0.841607
REGULATION OF RESPONSE TO REACTIVE OXYGEN SPECIES GOBP GO:1901031	20	0.757086	1.41798	0.0623306	0.846129
PLATELET DEGRANULATION GOBP GO:0002576	88	0.606105	1.41766	0.0144404	0.841309
PLATELET DEGRANULATION REACTOME DATABASE ID RELEASE 71 114608	91	0.592831	1.41489	0.016129	0.853612
NEGATIVE REGULATION OF PROTEIN TRANSPORT GOBP GO:0051224	89	0.597761	1.4142	0.018797	0.851927
BLOOD COAGULATION PANTHER PATHWAY P00011	17	0.769198	1.41373	0.0835443	0.848342
BIOCARTA_ARAP_PATHWAY MSIGDB_C2 BIOCARTA_ARAP_PATHWAY	16	0.791158	1.41351	0.0721154	0.84324
EMBRYONIC LIMB MORPHOGENESIS GOBP GO:0030326	29	0.725076	1.41203	0.0583333	0.847308
NEGATIVE REGULATION OF HORMONE SECRETION GOBP GO:0046888	21	0.76024	1.4113	0.0634921	0.845722
TELOMERE CAPPING GOBP GO:0016233	19	0.763212	1.41054	0.0833333	0.84435
HDMS DEMETHYLATE HISTONES REACTOME R-HSA-3214842.3	23	0.741883	1.40961	0.0547112	0.844235
INTERLEUKIN-7 SIGNALING REACTOME DATABASE ID RELEASE 71 1266695	17	0.785014	1.40857	0.0808081	0.845294
ENDOCARDIAL CUSHION MORPHOGENESIS GOBP GO:0003203	19	0.771353	1.40744	0.0810127	0.846523
NEUROTRANSMITTER BIOSYNTHETIC PROCESS GOBP GO:0042136	15	0.788633	1.40645	0.0683544	0.846666
APPENDAGE MORPHOGENESIS GOBP GO:0035107	37	0.670751	1.40626	0.0670554	0.841652
NEOVASCULARISATION PROCESSES WIKIPATHWAYS_20191210 WP4331 HOMO SAPIENS	33	0.69587	1.40621	0.0612813	0.8358
SIGNALING BY ERBB2 KD MUTANTS REACTOME DATABASE ID RELEASE 71 9664565	16	0.796643	1.40621	0.0737705	0.82978
REGULATION OF ENDOPLASMIC RETICULUM STRESS-INDUCED INTRINSIC APOPTOTIC SIGNALING PATHWAY GOBP GO:1902235	19	0.79146	1.40572	0.0419947	0.826979
NEGATIVE REGULATION OF GTPASE ACTIVITY GOBP GO:0034260	19	0.775059	1.4056	0.0851648	0.821818
REGULATION OF NEUTROPHIL MIGRATION GOBP GO:1902622	21	0.764636	1.40515	0.0537634	0.818874
POSITIVE REGULATION BY HOST OF VIRAL TRANSCRIPTION GOBP GO:0043923	16	0.796497	1.4046	0.0873016	0.816736
CEREBELLUM DEVELOPMENT GOBP GO:0021549	16	0.779361	1.40282	0.0783784	0.822126
METENCEPHALON DEVELOPMENT GOBP GO:0022037	16	0.779361	1.40172	0.0798005	0.822905
BRANCHED-CHAIN AMINO ACID CATABOLISM REACTOME R-HSA-70895.3	19	0.762775	1.40116	0.0963542	0.820913
REGULATION OF ACTIN DYNAMICS FOR PHAGOCYTIC CUP FORMATION REACTOME DATABASE ID RELEASE 71 2029482	48	0.639537	1.39897	0.0590164	0.829921
REGULATION OF GRANULOCYTE CHEMOTAXIS GOBP GO:0071622	24	0.727802	1.39776	0.0978261	0.831683
HATS ACETYLATE HISTONES REACTOME R-HSA-3214847.1	81	0.597849	1.39649	0.0318725	0.83444
ENDOCARDIAL CUSHION DEVELOPMENT GOBP GO:0003197	24	0.731635	1.39579	0.0997151	0.833449
BIOCARTA_IGF1R_PATHWAY MSIGDB_C2 BIOCARTA_IGF1R_PATHWAY	21	0.736549	1.3956	0.0837989	0.829258
ORGAN GROWTH GOBP GO:0035265	32	0.702487	1.39507	0.08	0.826965
BRANCHED-CHAIN AMINO ACID METABOLIC PROCESS GOBP GO:0009081	21	0.753181	1.39387	0.097561	0.829142
OLIGODENDROCYTE DEVELOPMENT GOBP GO:0014003	15	0.795901	1.39362	0.0948718	0.825161
PROSTAGLANDIN SYNTHESIS AND REGULATION WIKIPATHWAYS_20191210 WP98 HOMO SAPIENS	33	0.676099	1.3933	0.0685714	0.821927
REGULATION OF KERATINOCYTE DIFFERENTIATION GOBP GO:0045616	22	0.729077	1.39316	0.0789474	0.817461
CENTRIOLE REPLICATION GOBP GO:0007099	16	0.764049	1.39166	0.0815789	0.821553
NEGATIVE REGULATION OF PROTEOLYSIS GOBP GO:0045861	148	0.542138	1.39151	0.00469484	0.81721
RETROGRADE TRANSPORT, ENDOSOME TO GOLGI GOBP GO:0042147	80	0.596052	1.39068	0.0337079	0.817128
BIOCARTA_PTDINS_PATHWAY MSIGDB_C2 BIOCARTA_PTDINS_PATHWAY	21	0.724626	1.38939	0.0783784	0.820547
RUNX1 REGULATES GENES INVOLVED IN MEGAKARYOCYTE DIFFERENTIATION AND PLATELET FUNCTION REACTOME DATABASE ID RELEASE 71 8936459	36	0.661182	1.38683	0.0739645	0.831299
REGULATION OF EPIDERMAL CELL DIFFERENTIATION GOBP GO:0045604	27	0.7043	1.38623	0.0740741	0.829753
CHROMATIN DISASSEMBLY GOBP GO:0031498	15	0.780702	1.38617	0.0701299	0.824904
NEGATIVE REGULATION OF PROTEIN CATABOLIC PROCESS GOBP GO:0042177	93	0.581274	1.38531	0.0297872	0.825154
REGULATION OF RESPONSE TO INTERFERON-GAMMA GOBP GO:0060330	18	0.766285	1.38513	0.0733696	0.82111
POSITIVE REGULATION OF CARTILAGE DEVELOPMENT GOBP GO:0061036	17	0.775116	1.38348	0.0731071	0.826469
NUCLEOSOME DISASSEMBLY GOBP GO:0006337	15	0.780702	1.38144	0.109043	0.833323
REGULATION OF COAGULATION GOBP GO:0050818	40	0.658649	1.38075	0.0691643	0.832287
REGULATION OF EXOSOMAL SECRETION GOBP GO:1903541	15	0.776029	1.38069	0.0846561	0.8277
NCRNA CATABOLIC PROCESS GOBP GO:0034661	25	0.714129	1.37913	0.0867209	0.832562
REGULATION OF EXTRINSIC APOPTOTIC SIGNALING PATHWAY VIA DEATH DOMAIN RECEPTORS GOBP GO:1902041	36	0.681965	1.37847	0.0623053	0.831546
PYRIMIDINE NUCLEOTIDE METABOLIC PROCESS GOBP GO:0006220	28	0.692893	1.37823	0.0935673	0.828207
OLIGODENDROCYTE DIFFERENTIATION GOBP GO:0048709	19	0.738337	1.37771	0.08078	0.826575
CHLORIDE TRANSPORT GOBP GO:0006821	29	0.695966	1.37633	0.101983	0.830186
REGULATION OF EPIDERMIS DEVELOPMENT GOBP GO:0045682	34	0.658066	1.37601	0.0750751	0.827362
LIMB MORPHOGENESIS GOBP GO:0035108	37	0.670751	1.37559	0.0960961	0.825014
ARF1 PATHWAY PATHWAY INTERACTION DATABASE NCI-NATURE CURATED DATA ARF1 PATHWAY	18	0.751981	1.37418	0.0847458	0.828797
REGULATION OF OXIDATIVE STRESS-INDUCED CELL DEATH GOBP GO:1903201	37	0.657382	1.37396	0.0870871	0.825174
REGULATION OF CYTOPLASMIC TRANSLATION GOBP GO:2000765	23	0.723893	1.37388	0.0751445	0.820994
HAIR FOLLICLE DEVELOPMENT: CYTODIFFERENTIATION (PART 3 OF 3) WIKIPATHWAYS_20191210 WP2840 HOMO SAPIENS	52	0.633849	1.37356	0.0685358	0.818118
SIGNALING EVENTS MEDIATED BY STEM CELL FACTOR RECEPTOR (C-KIT) PATHWAY INTERACTION DATABASE NCI-NATURE CURATED DATA SIGNALING EVENTS MEDIATED BY STEM CELL FACTOR RECEPTOR (C-KIT)	44	0.638222	1.37336	0.059375	0.814551
NEURON RECOGNITION GOBP GO:0008038	26	0.717483	1.37247	0.1	0.815275
NEGATIVE REGULATION OF MYELOID CELL DIFFERENTIATION GOBP GO:0045638	33	0.682801	1.37124	0.0895522	0.818066
PROTEIN LOCALIZATION TO CHROMOSOME GOBP GO:0034502	52	0.608118	1.37112	0.0690789	0.814268
REGULATION OF BLOOD COAGULATION GOBP GO:0030193	38	0.665823	1.37	0.100917	0.816547
GOLGI TO ENDOSOME TRANSPORT GOBP GO:0006895	15	0.796265	1.36787	0.104592	0.824137
ESTABLISHMENT OR MAINTENANCE OF BIPOLAR CELL POLARITY GOBP GO:0061245	32	0.670883	1.36772	0.0753623	0.820531
NCAM SIGNALING FOR NEURITE OUT-GROWTH REACTOME DATABASE ID RELEASE 71 375165	32	0.682212	1.36741	0.0888252	0.817993
NEGATIVE REGULATION OF HEMOPOIESIS GOBP GO:1903707	59	0.616545	1.36724	0.0464286	0.814638
NONHOMOLOGOUS END-JOINING (NHEJ) REACTOME DATABASE ID RELEASE 71 5693571	38	0.667979	1.36717	0.0607903	0.810607
NEGATIVE REGULATION OF INNATE IMMUNE RESPONSE GOBP GO:0045824	28	0.691623	1.36687	0.108108	0.807945
REGULATION OF HORMONE BIOSYNTHETIC PROCESS GOBP GO:0046885	18	0.748626	1.36582	0.0968523	0.809763
CYCLIN A B1 B2 ASSOCIATED EVENTS DURING G2 M TRANSITION REACTOME R-HSA-69273.6	24	0.707977	1.36502	0.107143	0.810074
PID_ARF_3PATHWAY MSIGDB_C2 PID_ARF_3PATHWAY	18	0.751981	1.36415	0.104859	0.810961
REGULATION OF REGULATORY T CELL DIFFERENTIATION GOBP GO:0045589	15	0.787613	1.36367	0.108753	0.809222
PID_TAP63_PATHWAY MSIGDB_C2 PID_TAP63_PATHWAY	48	0.633383	1.36341	0.0535117	0.806557
PID_ECADHERIN_STABILIZATION_PATHWAY MSIGDB_C2 PID_ECADHERIN_STABILIZATION_PATHWAY	37	0.649845	1.36064	0.0638298	0.817513
POSITIVE REGULATION OF DNA BIOSYNTHETIC PROCESS GOBP GO:2000573	59	0.60982	1.3602	0.0477707	0.81616
INORGANIC ANION TRANSPORT GOBP GO:0015698	45	0.645798	1.35957	0.0790274	0.815316
REGULATION OF MUSCLE TISSUE DEVELOPMENT GOBP GO:1901861	48	0.629311	1.35881	0.0825083	0.81557
STABILIZATION AND EXPANSION OF THE E-CADHERIN ADHERENS JUNCTION PATHWAY INTERACTION DATABASE NCI-NATURE CURATED DATA STABILIZATION AND EXPANSION OF THE E-CADHERIN ADHERENS JUNCTION	37	0.649845	1.35872	0.0703364	0.811965
PID_KIT_PATHWAY MSIGDB_C2 PID_KIT_PATHWAY	45	0.638016	1.35866	0.0698413	0.808286
REGULATION OF ANDROGEN RECEPTOR SIGNALING PATHWAY GOBP GO:0060765	24	0.704988	1.35845	0.105405	0.805301
NCRNAS INVOLVED IN WNT SIGNALING IN HEPATOCELLULAR CARCINOMA WIKIPATHWAYS_20191210 WP4336 HOMO SAPIENS	63	0.599079	1.35731	0.0750853	0.80757
NEURAL CREST CELL MIGRATION IN CANCER WIKIPATHWAYS_20191210 WP4565 HOMO SAPIENS	32	0.65095	1.35703	0.101408	0.805148
REGULATION OF SIGNALING RECEPTOR ACTIVITY GOBP GO:0010469	64	0.596401	1.35667	0.0605096	0.803207
REGULATION OF PROTEIN DEPOLYMERIZATION GOBP GO:1901879	48	0.622432	1.35578	0.0716612	0.804112
REGULATION OF HEMOSTASIS GOBP GO:1900046	38	0.665823	1.35493	0.0852941	0.804827
BIOCARTA_IGF1_PATHWAY MSIGDB_C2 BIOCARTA_IGF1_PATHWAY	19	0.732144	1.35472	0.119898	0.802004
REGULATION OF STRIATED MUSCLE TISSUE DEVELOPMENT GOBP GO:0016202	48	0.629311	1.35339	0.0864198	0.805205
NEGATIVE REGULATION OF JAK-STAT CASCADE GOBP GO:0046426	15	0.768048	1.35285	0.0952381	0.804298
RECYCLING PATHWAY OF L1 REACTOME R-HSA-437239.1	24	0.696904	1.35274	0.122563	0.801059
REGULATION OF DNA-DEPENDENT DNA REPLICATION GOBP GO:0090329	41	0.631349	1.35247	0.0705521	0.798654
MITOCHONDRIAL FISSION GOBP GO:0000266	16	0.735741	1.35112	0.0968523	0.802215
METAL ION SLC TRANSPORTERS REACTOME DATABASE ID RELEASE 71 425410	18	0.744908	1.35096	0.12	0.79927
PROTEIN HETEROOLIGOMERIZATION GOBP GO:0051291	16	0.755266	1.35021	0.123563	0.799713
REGULATION OF MUSCLE ORGAN DEVELOPMENT GOBP GO:0048634	49	0.629191	1.34995	0.0650155	0.797505
INTERLEUKIN-4 AND INTERLEUKIN-13 SIGNALING REACTOME R-HSA-6785807.5	73	0.584161	1.34863	0.0507246	0.800607
NEGATIVE REGULATION OF STAT CASCADE GOBP GO:1904893	15	0.768048	1.34727	0.117794	0.80456
SOMATIC DIVERSIFICATION OF IMMUNOGLOBULINS GOBP GO:0016445	18	0.742346	1.34664	0.075067	0.804513
PID_CMYB_PATHWAY MSIGDB_C2 PID_CMYB_PATHWAY	58	0.595887	1.34654	0.0608974	0.801454
ESTABLISHMENT OR MAINTENANCE OF APICAL/BASAL CELL POLARITY GOBP GO:0035088	32	0.670883	1.34647	0.105882	0.798141
KIT RECEPTOR SIGNALING PATHWAY WIKIPATHWAYS_20191210 WP304 HOMO SAPIENS	51	0.623643	1.34463	0.0759076	0.804342
POSITIVE REGULATION OF INTRACELLULAR TRANSPORT GOBP GO:0032388	156	0.511796	1.34354	0.0213904	0.806282
NEGATIVE REGULATION OF HYDROLASE ACTIVITY GOBP GO:0051346	188	0.51151	1.34349	0.0115607	0.802892
REGULATION OF MYOTUBE DIFFERENTIATION GOBP GO:0010830	24	0.715964	1.3426	0.10585	0.804089
VALIDATED TRANSCRIPTIONAL TARGETS OF TAP63 ISOFORMS PATHWAY INTERACTION DATABASE NCI-NATURE CURATED DATA VALIDATED TRANSCRIPTIONAL TARGETS OF TAP63 ISOFORMS	49	0.629477	1.34239	0.0952381	0.801544
ESTABLISHMENT OR MAINTENANCE OF EPITHELIAL CELL APICAL/BASAL POLARITY GOBP GO:0045197	30	0.671509	1.34018	0.106017	0.80941
NEGATIVE REGULATION OF PEPTIDASE ACTIVITY GOBP GO:0010466	78	0.565647	1.33879	0.0474308	0.813133
REGULATION OF WOUND HEALING GOBP GO:0061041	76	0.572737	1.33873	0.0511945	0.809906
REGULATION OF SYNAPTIC VESICLE CYCLE GOBP GO:0098693	30	0.672941	1.33819	0.0955414	0.8092
BIOCARTA_MET_PATHWAY MSIGDB_C2 BIOCARTA_MET_PATHWAY	34	0.652571	1.33741	0.0871935	0.809751
NEGATIVE REGULATION OF SEQUESTERING OF CALCIUM ION GOBP GO:0051283	31	0.673938	1.33636	0.112094	0.811904
APOPTOSIS MODULATION BY HSP70 WIKIPATHWAYS_20191210 WP384 HOMO SAPIENS	18	0.726649	1.33533	0.126316	0.813711
FORMATION OF FIBRIN CLOT (CLOTTING CASCADE) REACTOME DATABASE ID RELEASE 71 140877	17	0.739101	1.33498	0.131579	0.812195
EPIDERMAL GROWTH FACTOR RECEPTOR SIGNALING PATHWAY GOBP GO:0007173	34	0.664051	1.33496	0.115385	0.808835
NEGATIVE REGULATION OF OXIDATIVE STRESS-INDUCED CELL DEATH GOBP GO:1903202	27	0.669217	1.33395	0.125	0.810661
RESPONSE TO ESTROGEN GOBP GO:0043627	25	0.674387	1.33391	0.0892857	0.807409
LNCRNA INVOLVEMENT IN CANONICAL WNT SIGNALING AND COLORECTAL CANCER WIKIPATHWAYS_20191210 WP4258 HOMO SAPIENS	71	0.581206	1.33015	0.0702341	0.823496
REGULATION OF RAC1 ACTIVITY PATHWAY INTERACTION DATABASE NCI-NATURE CURATED DATA REGULATION OF RAC1 ACTIVITY	29	0.67043	1.3301	0.117479	0.820294
TP53 REGULATES TRANSCRIPTION OF CELL CYCLE GENES REACTOME R-HSA-6791312.3	47	0.60961	1.32968	0.0772059	0.8191
NEGATIVE REGULATION OF FIBROBLAST PROLIFERATION GOBP GO:0048147	16	0.733727	1.32922	0.0989848	0.818049
EMBRYONIC ORGAN MORPHOGENESIS GOBP GO:0048562	78	0.571784	1.32842	0.0629921	0.818828
AORTA DEVELOPMENT GOBP GO:0035904	19	0.743331	1.32769	0.117188	0.81932
COLLAGEN BIOSYNTHESIS AND MODIFYING ENZYMES REACTOME R-HSA-1650814.3	50	0.616962	1.32711	0.113712	0.818776
POSITIVE REGULATION OF OSSIFICATION GOBP GO:0045778	49	0.612701	1.32691	0.108197	0.816339
TNFSF1 IOB TNFSF1	15	0.753662	1.32648	0.157609	0.815406
PID_RAC1_REG_PATHWAY MSIGDB_C2 PID_RAC1_REG_PATHWAY	29	0.67043	1.3257	0.110803	0.816177
REGULATION OF RESPONSE TO BIOTIC STIMULUS GOBP GO:0002831	77	0.571392	1.32223	0.0674603	0.830629
RAS PATHWAY PANTHER PATHWAY P04393	69	0.567306	1.3209	0.0740741	0.834476
NEGATIVE REGULATION OF CELLULAR CATABOLIC PROCESS GOBP GO:0031330	179	0.512248	1.31958	0.0104167	0.838315
C-MYB TRANSCRIPTION FACTOR NETWORK PATHWAY INTERACTION DATABASE NCI-NATURE CURATED DATA C-MYB TRANSCRIPTION FACTOR NETWORK	58	0.595887	1.31847	0.0748299	0.840772
RESPONSE TO DSRNA GOBP GO:0043331	22	0.69786	1.31823	0.115869	0.838745
SIGNALING OF HEPATOCYTE GROWTH FACTOR RECEPTOR WIKIPATHWAYS_20191210 WP313 HOMO SAPIENS	33	0.652577	1.31759	0.119403	0.838613
NEGATIVE REGULATION OF CELLULAR RESPONSE TO OXIDATIVE STRESS GOBP GO:1900408	27	0.669217	1.3171	0.112462	0.837806
MATRIX METALLOPROTEINASES WIKIPATHWAYS_20191210 WP129 HOMO SAPIENS	18	0.73376	1.31649	0.12605	0.837546
NEUROMUSCULAR JUNCTION DEVELOPMENT GOBP GO:0007528	22	0.702074	1.31374	0.149215	0.848487
TELOMERE MAINTENANCE GOBP GO:0000723	85	0.541663	1.31175	0.0795848	0.855529
REGULATION OF CHROMATIN SILENCING GOBP GO:0031935	30	0.651561	1.31102	0.127219	0.855975
ST_DIFFERENTIATION_PATHWAY_IN_PC12_CELLS MSIGDB_C2 ST_DIFFERENTIATION_PATHWAY_IN_PC12_CELLS	34	0.639404	1.31036	0.106017	0.856146
PROTEIN DEGLYCOSYLATION GOBP GO:0006517	26	0.681614	1.30968	0.134021	0.856388
CELLULAR RESPONSE TO DSRNA GOBP GO:0071359	16	0.739255	1.30915	0.147453	0.855876
NEGATIVE REGULATION OF CYSTEINE-TYPE ENDOPEPTIDASE ACTIVITY INVOLVED IN APOPTOTIC PROCESS GOBP GO:0043154	44	0.614684	1.30907	0.0892857	0.852993
BIOCARTA_MAL_PATHWAY MSIGDB_C2 BIOCARTA_MAL_PATHWAY	17	0.735967	1.30792	0.144444	0.855686
ACTIN CYTOSKELETON REORGANIZATION GOBP GO:0031532	50	0.598614	1.30747	0.0977199	0.854777
SNORNA METABOLIC PROCESS GOBP GO:0016074	16	0.729768	1.30686	0.144703	0.854487
PEPTIDYL-TYROSINE DEPHOSPHORYLATION GOBP GO:0035335	24	0.688978	1.30439	0.12987	0.864036
RORA ACTIVATES GENE EXPRESSION REACTOME DATABASE ID RELEASE 71 1368082	18	0.718113	1.30395	0.15443	0.862983
MITOTIC G2/M TRANSITION CHECKPOINT GOBP GO:0044818	23	0.677819	1.30375	0.140212	0.860683
NEGATIVE REGULATION OF TYPE I INTERFERON PRODUCTION GOBP GO:0032480	38	0.629037	1.30324	0.137026	0.85993
NEGATIVE REGULATION OF PROTEASOMAL PROTEIN CATABOLIC PROCESS GOBP GO:1901799	41	0.610745	1.30194	0.0898876	0.863205
POSITIVE REGULATION OF PROTEIN EXPORT FROM NUCLEUS GOBP GO:0046827	15	0.751242	1.30182	0.129353	0.860629
DETERMINATION OF LEFT/RIGHT SYMMETRY GOBP GO:0007368	41	0.616357	1.30137	0.0952381	0.859583
ACTIN FILAMENT POLYMERIZATION GOBP GO:0030041	17	0.728925	1.3013	0.137363	0.856779
RHO GTPASES ACTIVATE WASPS AND WAVES REACTOME DATABASE ID RELEASE 71 5663213	31	0.644674	1.30118	0.111765	0.854222
DOUBLE-STRAND BREAK REPAIR VIA NONHOMOLOGOUS END JOINING GOBP GO:0006303	57	0.593858	1.30115	0.113074	0.851235
REGULATION OF BLOOD VESSEL ENDOTHELIAL CELL MIGRATION GOBP GO:0043535	72	0.557534	1.30039	0.0815603	0.851924
POSITIVE REGULATION OF SYNAPTIC TRANSMISSION GOBP GO:0050806	44	0.615134	1.29914	0.109422	0.855202
REGULATION OF RESPONSE TO OXIDATIVE STRESS GOBP GO:1902882	51	0.583685	1.29858	0.0932476	0.854837
HCMV LATE EVENTS REACTOME R-HSA-9610379.1	47	0.607411	1.29827	0.10443	0.853343
MIRNA METABOLIC PROCESS GOBP GO:0010586	17	0.726517	1.29794	0.14	0.851852
NEGATIVE REGULATION OF CELLULAR RESPONSE TO INSULIN STIMULUS GOBP GO:1900077	17	0.725935	1.29782	0.151515	0.849382
NEGATIVE REGULATION OF INSULIN RECEPTOR SIGNALING PATHWAY GOBP GO:0046627	16	0.743177	1.29765	0.14321	0.847331
NEGATIVE REGULATION OF CYSTEINE-TYPE ENDOPEPTIDASE ACTIVITY GOBP GO:2000117	47	0.602677	1.29659	0.110345	0.849584
NOTCH4 INTRACELLULAR DOMAIN REGULATES TRANSCRIPTION REACTOME DATABASE ID RELEASE 71 9013695	15	0.74136	1.29579	0.15601	0.850544
BIOCARTA_MCALPAIN_PATHWAY MSIGDB_C2 BIOCARTA_MCALPAIN_PATHWAY	18	0.701111	1.29571	0.179625	0.847964
REGULATION OF CELL ADHESION MEDIATED BY INTEGRIN GOBP GO:0033628	28	0.655476	1.29533	0.111111	0.847126
PID_WNT_SIGNALING_PATHWAY MSIGDB_C2 PID_WNT_SIGNALING_PATHWAY	20	0.702362	1.29528	0.132812	0.844478
PDGFR-ALPHA SIGNALING PATHWAY PATHWAY INTERACTION DATABASE NCI-NATURE CURATED DATA PDGFR-ALPHA SIGNALING PATHWAY	20	0.693392	1.29467	0.144304	0.844524
PROTEIN ACTIVATION CASCADE GOBP GO:0072376	24	0.666996	1.29429	0.134247	0.843603
AXON GUIDANCE MEDIATED BY SEMAPHORINS PANTHER PATHWAY P00007	17	0.725613	1.29366	0.146341	0.843769
NCAM1 INTERACTIONS REACTOME R-HSA-419037.1	17	0.724903	1.29319	0.145455	0.843349
DIRECT P53 EFFECTORS PATHWAY INTERACTION DATABASE NCI-NATURE CURATED DATA DIRECT P53 EFFECTORS	120	0.51415	1.29294	0.0382979	0.841541
NEGATIVE REGULATION OF SYNAPTIC TRANSMISSION GOBP GO:0050805	19	0.680139	1.29273	0.166247	0.839765
NEGATIVE REGULATION OF PEPTIDE SECRETION GOBP GO:0002792	57	0.573428	1.29214	0.123778	0.839913
CELL REDOX HOMEOSTASIS GOBP GO:0045454	22	0.680781	1.29191	0.106849	0.838229
MEIOTIC RECOMBINATION REACTOME R-HSA-912446.2	30	0.647876	1.29163	0.115281	0.836799
PID_IL2_1PATHWAY MSIGDB_C2 PID_IL2_1PATHWAY	43	0.614255	1.29162	0.101796	0.834004
COLLAGEN DEGRADATION REACTOME DATABASE ID RELEASE 71 1442490	24	0.680218	1.29108	0.149718	0.833796
POST NMDA RECEPTOR ACTIVATION EVENTS REACTOME R-HSA-438064.3	42	0.606473	1.29096	0.121875	0.831534
RELATIONSHIP BETWEEN INFLAMMATION, COX-2 AND EGFR WIKIPATHWAYS_20191210 WP4483 HOMO SAPIENS	23	0.683955	1.2906	0.163636	0.830422
DEVELOPMENTAL GROWTH GOBP GO:0048589	102	0.531571	1.29012	0.0798479	0.829976
MYOTUBE DIFFERENTIATION GOBP GO:0014902	16	0.719671	1.28985	0.168865	0.828506
PID_PDGFRA_PATHWAY MSIGDB_C2 PID_PDGFRA_PATHWAY	20	0.693392	1.289	0.157216	0.829815
POSITIVE REGULATION OF CELL CYCLE G2/M PHASE TRANSITION GOBP GO:1902751	22	0.70419	1.28699	0.130435	0.836827
IL2-MEDIATED SIGNALING EVENTS PATHWAY INTERACTION DATABASE NCI-NATURE CURATED DATA IL2-MEDIATED SIGNALING EVENTS	42	0.614656	1.28633	0.101796	0.837235
ZYMOGEN ACTIVATION GOBP GO:0031638	22	0.673832	1.28577	0.152542	0.837313
BIOCARTA_HER2_PATHWAY MSIGDB_C2 BIOCARTA_HER2_PATHWAY	19	0.70736	1.28567	0.176966	0.835044
REGULATION OF CELLULAR RESPONSE TO DRUG GOBP GO:2001038	16	0.725554	1.28483	0.154047	0.836313
GROWTH GOBP GO:0040007	103	0.531445	1.28404	0.0524017	0.837534
REGULATION OF EPITHELIAL CELL DIFFERENTIATION GOBP GO:0030856	63	0.572752	1.28362	0.114094	0.836871
REGULATION OF NEURON MIGRATION GOBP GO:2001222	19	0.706781	1.28275	0.164456	0.838312
MITOTIC CHROMOSOME CONDENSATION GOBP GO:0007076	16	0.739317	1.28148	0.173469	0.841815
DIFFERENTIATION PATHWAY WIKIPATHWAYS_20191210 WP2848 HOMO SAPIENS	30	0.63683	1.28124	0.129577	0.840256
NEGATIVE REGULATION OF PROTEIN SECRETION GOBP GO:0050709	56	0.573663	1.28112	0.0996678	0.838058
CELLULAR RESPONSE TO VIRUS GOBP GO:0098586	21	0.693406	1.27986	0.145889	0.841435
NEGATIVE REGULATION OF PROTEASOMAL UBIQUITIN-DEPENDENT PROTEIN CATABOLIC PROCESS GOBP GO:0032435	28	0.648679	1.27976	0.150725	0.839255
NEGATIVE REGULATION OF ACTIN FILAMENT POLYMERIZATION GOBP GO:0030837	27	0.646328	1.2796	0.16129	0.837363
WNT SIGNALING NETWORK PATHWAY INTERACTION DATABASE NCI-NATURE CURATED DATA WNT SIGNALING NETWORK	19	0.70271	1.27934	0.19086	0.835925
REGULATION OF INTRACELLULAR STEROID HORMONE RECEPTOR SIGNALING PATHWAY GOBP GO:0033143	56	0.581454	1.27833	0.110429	0.837967
POSITIVE REGULATION OF REACTIVE OXYGEN SPECIES METABOLIC PROCESS GOBP GO:2000379	45	0.588199	1.27788	0.110063	0.837374
NON-RECOMBINATIONAL REPAIR GOBP GO:0000726	63	0.565065	1.2772	0.10299	0.838051
REGULATION OF GENE SILENCING GOBP GO:0060968	103	0.525163	1.27528	0.0750988	0.844937
REGULATION OF RELEASE OF CYTOCHROME C FROM MITOCHONDRIA GOBP GO:0090199	32	0.632685	1.27466	0.135447	0.845284
TELOMERE ORGANIZATION GOBP GO:0032200	87	0.541655	1.27408	0.0666667	0.845225
NEGATIVE REGULATION OF INTRACELLULAR PROTEIN TRANSPORT GOBP GO:0090317	24	0.658987	1.27373	0.146982	0.844306
NEGATIVE REGULATION OF INTRACELLULAR STEROID HORMONE RECEPTOR SIGNALING PATHWAY GOBP GO:0033144	26	0.65559	1.27203	0.151786	0.849709
APPENDAGE DEVELOPMENT GOBP GO:0048736	53	0.579472	1.27001	0.111475	0.856842
NEGATIVE REGULATION OF ERK1 AND ERK2 CASCADE GOBP GO:0070373	34	0.619985	1.26957	0.160665	0.856269
PID_ATF2_PATHWAY MSIGDB_C2 PID_ATF2_PATHWAY	49	0.575228	1.26838	0.125806	0.859173
KIDNEY MORPHOGENESIS GOBP GO:0060993	26	0.64662	1.26837	0.179558	0.856584
ENDOCYTIC RECYCLING GOBP GO:0032456	34	0.632361	1.26805	0.148936	0.855596
DETOXIFICATION GOBP GO:0098754	19	0.701603	1.26718	0.185484	0.857278
FGF SIGNALING PATHWAY PANTHER PATHWAY P00021	87	0.538499	1.26656	0.0753425	0.857672
NEGATIVE REGULATION OF BINDING GOBP GO:0051100	105	0.519578	1.26469	0.0748899	0.864318
NEGATIVE REGULATION OF AUTOPHAGY GOBP GO:0010507	55	0.574201	1.26466	0.114865	0.861841
MEMBRANE DEPOLARIZATION DURING ACTION POTENTIAL GOBP GO:0086010	19	0.705013	1.26356	0.214477	0.864405
POSITIVE REGULATION OF PEPTIDYL-THREONINE PHOSPHORYLATION GOBP GO:0010800	17	0.719658	1.26333	0.200521	0.862964
REGULATION OF PEPTIDE HORMONE SECRETION GOBP GO:0090276	79	0.537622	1.26286	0.103806	0.862626
LUNG FIBROSIS WIKIPATHWAYS_20191210 WP3624 HOMO SAPIENS	31	0.636895	1.26159	0.154286	0.865804
MITOTIC CYTOKINETIC PROCESS GOBP GO:1902410	17	0.706682	1.26025	0.186869	0.869691
LIMB DEVELOPMENT GOBP GO:0060173	53	0.579472	1.26008	0.128814	0.867922
CELLULAR KETONE METABOLIC PROCESS GOBP GO:0042180	30	0.631821	1.25894	0.168508	0.871044
NEGATIVE REGULATION OF CELL DIFFERENTIATION GOBP GO:0045596	293	0.458615	1.25882	0.00884956	0.869033
REGULATION OF TYPE I INTERFERON PRODUCTION GOBP GO:0032479	100	0.509799	1.2582	0.0801527	0.869337
NEGATIVE REGULATION OF RESPONSE TO DRUG GOBP GO:2001024	16	0.7131	1.25754	0.198992	0.870212
SIGNALING EVENTS MEDIATED BY TCPTP PATHWAY INTERACTION DATABASE NCI-NATURE CURATED DATA SIGNALING EVENTS MEDIATED BY TCPTP	33	0.617601	1.25744	0.172414	0.868244
ATF-2 TRANSCRIPTION FACTOR NETWORK PATHWAY INTERACTION DATABASE NCI-NATURE CURATED DATA ATF-2 TRANSCRIPTION FACTOR NETWORK	49	0.575228	1.25721	0.125	0.866795
ONCOSTATIN M SIGNALING PATHWAY WIKIPATHWAYS_20191210 WP2374 HOMO SAPIENS	59	0.563704	1.25517	0.11	0.873715
TRANSCRIPTIONAL ACTIVATION OF MITOCHONDRIAL BIOGENESIS REACTOME DATABASE ID RELEASE 71 2151201	49	0.572255	1.25414	0.109589	0.876103
PLATELET ACTIVATION, SIGNALING AND AGGREGATION REACTOME DATABASE ID RELEASE 71 76002	183	0.472778	1.25404	0.0734463	0.874112
GENES INVOLVED IN MALE INFERTILITY WIKIPATHWAYS_20191210 WP4673 HOMO SAPIENS	85	0.531762	1.25404	0.0918728	0.871618
NEPHRON MORPHOGENESIS GOBP GO:0072028	22	0.655668	1.25312	0.18306	0.87354
KITRECEPTOR IOB KITRECEPTOR	76	0.529728	1.25284	0.103571	0.872372
CELL RECOGNITION GOBP GO:0008037	49	0.583923	1.2528	0.134058	0.870082
ENDOSOME TO LYSOSOME TRANSPORT GOBP GO:0008333	43	0.588925	1.25239	0.141956	0.869626
NEGATIVE REGULATION OF GENE SILENCING GOBP GO:0060969	21	0.658061	1.25238	0.189333	0.867246
CRMPS IN SEMA3A SIGNALING REACTOME R-HSA-399956.1	15	0.707641	1.24949	0.194712	0.878321
SISTER CHROMATID COHESION GOBP GO:0007062	33	0.602323	1.24906	0.153614	0.877724
PID_ECADHERIN_KERATINOCYTE_PATHWAY MSIGDB_C2 PID_ECADHERIN_KERATINOCYTE_PATHWAY	18	0.699513	1.2484	0.205729	0.878209
REGULATION OF ACTIN POLYMERIZATION OR DEPOLYMERIZATION GOBP GO:0008064	108	0.506691	1.24736	0.0769231	0.880771
RESPONSE TO EXOGENOUS DSRNA GOBP GO:0043330	18	0.676688	1.24718	0.188525	0.879164
GAMMA CARBOXYLATION, HYPUSINE FORMATION AND ARYLSULFATASE ACTIVATION REACTOME R-HSA-163841.3	30	0.636799	1.24658	0.181303	0.879588
E-CADHERIN SIGNALING IN KERATINOCYTES PATHWAY INTERACTION DATABASE NCI-NATURE CURATED DATA E-CADHERIN SIGNALING IN KERATINOCYTES	18	0.699513	1.24629	0.196891	0.878417
EPITHELIAL TO MESENCHYMAL TRANSITION GOBP GO:0001837	47	0.570786	1.24616	0.132911	0.876641
METANEPHROS DEVELOPMENT GOBP GO:0001656	28	0.640703	1.24579	0.174935	0.875889
POSITIVE REGULATION OF ENDOCYTOSIS GOBP GO:0045807	79	0.526208	1.24534	0.126923	0.875473
NEGATIVE REGULATION OF STRIATED MUSCLE TISSUE DEVELOPMENT GOBP GO:0045843	17	0.683852	1.24507	0.164835	0.874447
REGULATION OF OXIDATIVE STRESS-INDUCED INTRINSIC APOPTOTIC SIGNALING PATHWAY GOBP GO:1902175	20	0.666491	1.24489	0.2	0.872952
TRISTETRAPROLIN (TTP, ZFP36) BINDS AND DESTABILIZES MRNA REACTOME R-HSA-450513.2	15	0.706218	1.24462	0.235127	0.871759
POSITIVE REGULATION OF RESPONSE TO CYTOKINE STIMULUS GOBP GO:0060760	28	0.619064	1.24459	0.178947	0.869534
REGULATION OF ACTIN FILAMENT DEPOLYMERIZATION GOBP GO:0030834	25	0.647843	1.24404	0.15748	0.869671
NEGATIVE REGULATION OF DEVELOPMENTAL PROCESS GOBP GO:0051093	421	0.436809	1.24332	0.0138889	0.870605
NEGATIVE REGULATION OF DNA REPLICATION GOBP GO:0008156	25	0.650891	1.24293	0.17094	0.870068
MEMBRANE RAFT ORGANIZATION GOBP GO:0031579	15	0.726169	1.2429	0.216418	0.867838
NEGATIVE REGULATION OF PROTEIN BINDING GOBP GO:0032091	69	0.535037	1.2423	0.118243	0.868374
POSITIVE REGULATION OF SPROUTING ANGIOGENESIS GOBP GO:1903672	30	0.617667	1.24224	0.182609	0.866328
NEGATIVE REGULATION OF EXTRINSIC APOPTOTIC SIGNALING PATHWAY VIA DEATH DOMAIN RECEPTORS GOBP GO:1902042	24	0.658732	1.24157	0.2	0.867067
LYMPHOCYTE MEDIATED IMMUNITY GOBP GO:0002449	29	0.626989	1.24039	0.164179	0.87004
PPAR ALPHA PATHWAY WIKIPATHWAYS_20191210 WP2878 HOMO SAPIENS	16	0.688993	1.24033	0.215938	0.868038
SENSORY PERCEPTION GOBP GO:0007600	110	0.512302	1.23928	0.0897436	0.870351
REGULATION OF JUN KINASE ACTIVITY GOBP GO:0043506	48	0.570782	1.23923	0.126984	0.86828
NEGATIVE REGULATION OF MUSCLE ORGAN DEVELOPMENT GOBP GO:0048635	18	0.683488	1.23868	0.200483	0.868425
MITOTIC G2 DNA DAMAGE CHECKPOINT GOBP GO:0007095	16	0.71224	1.23752	0.211488	0.871334
REGULATION OF JNK CASCADE GOBP GO:0046328	111	0.502817	1.23714	0.100917	0.870815
NEGATIVE REGULATION OF EPIDERMAL GROWTH FACTOR RECEPTOR SIGNALING PATHWAY GOBP GO:0042059	37	0.59912	1.23692	0.173653	0.869465
DEOXYRIBONUCLEOTIDE METABOLIC PROCESS GOBP GO:0009262	26	0.638571	1.23631	0.1875	0.870027
REGULATION OF LEUKOCYTE DIFFERENTIATION GOBP GO:1902105	105	0.496354	1.23629	0.0896861	0.867852
NEGATIVE REGULATION OF STRIATED MUSCLE CELL DIFFERENTIATION GOBP GO:0051154	18	0.691047	1.23623	0.202156	0.865858
NEGATIVE REGULATION OF ENDOPEPTIDASE ACTIVITY GOBP GO:0010951	73	0.534164	1.23568	0.130112	0.865977
CREB1 PHOSPHORYLATION THROUGH NMDA RECEPTOR-MEDIATED ACTIVATION OF RAS SIGNALING REACTOME DATABASE ID RELEASE 71 442742	19	0.69229	1.23536	0.220844	0.865246
REGULATION OF CYTOPLASMIC TRANSPORT GOBP GO:1903649	23	0.656497	1.23463	0.19837	0.866387
TP53 REGULATES TRANSCRIPTION OF GENES INVOLVED IN G2 CELL CYCLE ARREST REACTOME R-HSA-6804114.2	17	0.698787	1.23279	0.201592	0.87233
NEUROTRANSMITTER METABOLIC PROCESS GOBP GO:0042133	29	0.616942	1.23185	0.180758	0.874233
RESPONSE TO ACID CHEMICAL GOBP GO:0001101	102	0.502233	1.23154	0.113537	0.873336
L1CAM INTERACTIONS REACTOME DATABASE ID RELEASE 71 373760	78	0.520665	1.23117	0.0929368	0.872755
NEGATIVE REGULATION OF T CELL PROLIFERATION GOBP GO:0042130	18	0.700206	1.23051	0.236413	0.873538
POSITIVE REGULATION OF FATTY ACID METABOLIC PROCESS GOBP GO:0045923	19	0.676477	1.23047	0.219451	0.871491
NEGATIVE REGULATION OF INTRACELLULAR TRANSPORT GOBP GO:0032387	36	0.588303	1.22938	0.170588	0.874309
NEPHRON EPITHELIUM MORPHOGENESIS GOBP GO:0072088	22	0.655668	1.22933	0.217765	0.872369
NEGATIVE REGULATION OF CELL-CELL ADHESION GOBP GO:0022408	82	0.517299	1.22921	0.114504	0.870716
RESPONSE TO ESTRADIOL GOBP GO:0032355	19	0.66482	1.22832	0.227882	0.872243
NEPHRON TUBULE MORPHOGENESIS GOBP GO:0072078	21	0.655677	1.22802	0.190883	0.871406
NRF2 PATHWAY WIKIPATHWAYS_20191210 WP2884 HOMO SAPIENS	82	0.52291	1.22779	0.111111	0.870261
LXR-MEDIATED SIGNALING REACTOME R-HSA-9024446.2	33	0.603742	1.2262	0.191667	0.875317
ORGANIC ACID TRANSPORT GOBP GO:0015849	136	0.479202	1.22602	0.0704846	0.873941
VESICLE DOCKING INVOLVED IN EXOCYTOSIS GOBP GO:0006904	24	0.630925	1.22555	0.186969	0.873982
REGULATION OF ACTIN FILAMENT LENGTH GOBP GO:0030832	109	0.505293	1.22552	0.13615	0.871923
PROTEIN-DNA COMPLEX DISASSEMBLY GOBP GO:0032986	17	0.670182	1.2247	0.221945	0.873274
POSITIVE REGULATION OF CELLULAR PROTEIN LOCALIZATION GOBP GO:1903829	241	0.454507	1.2247	0.0536913	0.871167
POSTSYNAPSE ORGANIZATION GOBP GO:0099173	36	0.587446	1.2238	0.168196	0.872846
NEGATIVE REGULATION OF OSTEOBLAST DIFFERENTIATION GOBP GO:0045668	20	0.675917	1.22324	0.223097	0.873264
ACID SECRETION GOBP GO:0046717	29	0.620609	1.22245	0.2	0.874761
NEGATIVE REGULATION OF CATALYTIC ACTIVITY GOBP GO:0043086	386	0.43321	1.22212	0.0111111	0.874148
CELLULAR DETOXIFICATION GOBP GO:1990748	18	0.670711	1.22207	0.22739	0.872199
EPHB FORWARD SIGNALING PATHWAY INTERACTION DATABASE NCI-NATURE CURATED DATA EPHB FORWARD SIGNALING	34	0.592035	1.22206	0.170659	0.870166
VESICLE DOCKING GOBP GO:0048278	42	0.578143	1.2218	0.155629	0.869201
HALLMARK_EPITHELIAL_MESENCHYMAL_TRANSITION MSIGDB_C2 HALLMARK_EPITHELIAL_MESENCHYMAL_TRANSITION	185	0.46554	1.22177	0.0545455	0.867224
CARBOXYLIC ACID TRANSPORT GOBP GO:0046942	136	0.479202	1.21963	0.0935961	0.874733
EXOCYTIC PROCESS GOBP GO:0140029	35	0.593543	1.21904	0.189024	0.875189
BIOCARTA_RAC1_PATHWAY MSIGDB_C2 BIOCARTA_RAC1_PATHWAY	20	0.664395	1.21889	0.239295	0.87371
REGULATION OF CDC42 ACTIVITY PATHWAY INTERACTION DATABASE NCI-NATURE CURATED DATA REGULATION OF CDC42 ACTIVITY	25	0.632193	1.21882	0.214706	0.871926
NEGATIVE REGULATION OF PROTEIN PROCESSING GOBP GO:0010955	21	0.664081	1.21877	0.214646	0.870054
AMYOTROPHIC LATERAL SCLEROSIS (ALS) WIKIPATHWAYS_20191210 WP2447 HOMO SAPIENS	29	0.615534	1.21853	0.205056	0.869
PALLIUM DEVELOPMENT GOBP GO:0021543	41	0.573649	1.21779	0.184524	0.870067
PID_TXA2PATHWAY MSIGDB_C2 PID_TXA2PATHWAY	38	0.578427	1.21762	0.17378	0.868697
CLEAVAGE OF THE DAMAGED PYRIMIDINE REACTOME R-HSA-110329.2	20	0.658164	1.21754	0.2275	0.866984
ACTIVATION OF NMDA RECEPTORS AND POSTSYNAPTIC EVENTS REACTOME DATABASE ID RELEASE 71 442755	53	0.543834	1.217	0.155172	0.867346
REGULATION OF NMDA RECEPTOR ACTIVITY GOBP GO:2000310	15	0.681536	1.21621	0.252717	0.86871
PID_EPHB_FWD_PATHWAY MSIGDB_C2 PID_EPHB_FWD_PATHWAY	34	0.592035	1.21578	0.169184	0.86857
INTERNALIZATION OF ERBB1 PATHWAY INTERACTION DATABASE NCI-NATURE CURATED DATA INTERNALIZATION OF ERBB1	35	0.572143	1.21571	0.179063	0.866861
REGULATION OF RNA EXPORT FROM NUCLEUS GOBP GO:0046831	15	0.691821	1.21568	0.230964	0.865002
BIOCARTA_RARRXR_PATHWAY MSIGDB_C2 BIOCARTA_RARRXR_PATHWAY	15	0.68849	1.21566	0.219321	0.863084
KITRECEPTOR NETPATH KITRECEPTOR	87	0.514853	1.21457	0.132404	0.865722
RAF-INDEPENDENT MAPK1 3 ACTIVATION REACTOME DATABASE ID RELEASE 71 112409	21	0.644584	1.21386	0.211538	0.866564
NEGATIVE REGULATION OF MUSCLE TISSUE DEVELOPMENT GOBP GO:1901862	17	0.683852	1.21346	0.225806	0.866327
NEGATIVE REGULATION OF DNA-DEPENDENT DNA REPLICATION GOBP GO:2000104	17	0.686942	1.21316	0.22973	0.865562
REGULATION OF NUCLEOBASE-CONTAINING COMPOUND TRANSPORT GOBP GO:0032239	16	0.678178	1.21287	0.219638	0.864735
RESPONSE TO BMP GOBP GO:0071772	57	0.537154	1.21225	0.152249	0.86538
NUCLEAR ENVELOPE BREAKDOWN REACTOME R-HSA-2980766.2	43	0.575578	1.21206	0.174419	0.864271
CYTOPLASMIC SEQUESTERING OF TRANSCRIPTION FACTOR GOBP GO:0042994	15	0.693823	1.21136	0.25066	0.86534
BIOCARTA_SPRY_PATHWAY MSIGDB_C2 BIOCARTA_SPRY_PATHWAY	16	0.689817	1.21105	0.24878	0.864662
NEGATIVE REGULATION OF PROTEIN SERINE/THREONINE KINASE ACTIVITY GOBP GO:0071901	90	0.511257	1.20936	0.143969	0.869859
NEGATIVE REGULATION OF PROTEIN MATURATION GOBP GO:1903318	21	0.664081	1.20772	0.230986	0.874825
NUCLEAR PORE COMPLEX (NPC) DISASSEMBLY REACTOME DATABASE ID RELEASE 71 3301854	30	0.602488	1.20757	0.188571	0.873487
REGULATION OF SYNAPTIC VESICLE EXOCYTOSIS GOBP GO:2000300	21	0.646273	1.20591	0.240113	0.87851
DEPYRIMIDINATION REACTOME R-HSA-73928.1	20	0.658164	1.20588	0.251908	0.876651
ERBB SIGNALING PATHWAY GOBP GO:0038127	45	0.554363	1.20582	0.160142	0.875008
RECOGNITION AND ASSOCIATION OF DNA GLYCOSYLASE WITH SITE CONTAINING AN AFFECTED PYRIMIDINE REACTOME DATABASE ID RELEASE 71 110328	20	0.658164	1.20541	0.247283	0.874894
CELLULAR RESPONSE TO BMP STIMULUS GOBP GO:0071773	57	0.537154	1.20488	0.167832	0.875181
PID_CDC42_REG_PATHWAY MSIGDB_C2 PID_CDC42_REG_PATHWAY	25	0.632193	1.20477	0.201754	0.873713
BIOCARTA_TNFR1_PATHWAY MSIGDB_C2 BIOCARTA_TNFR1_PATHWAY	27	0.624318	1.20459	0.215517	0.87253
REGULATION OF CELL CYCLE CHECKPOINT GOBP GO:1901976	26	0.621756	1.20435	0.246612	0.87156
LYSOSOME LOCALIZATION GOBP GO:0032418	30	0.592684	1.20435	0.209169	0.869654
BASE-EXCISION REPAIR, AP SITE FORMATION REACTOME R-HSA-73929.2	21	0.658094	1.20328	0.224543	0.872301
DNA PACKAGING GOBP GO:0006323	103	0.487644	1.20279	0.100437	0.872569
EGF RECEPTOR SIGNALING PATHWAY PANTHER PATHWAY P00018	93	0.499153	1.20221	0.124528	0.873163
CYTOKINETIC PROCESS GOBP GO:0032506	30	0.613787	1.20184	0.204748	0.872733
ACTIVATION OF PROTEIN KINASE B ACTIVITY GOBP GO:0032148	23	0.619454	1.20171	0.240356	0.871399
REGULATION OF MEIOTIC CELL CYCLE GOBP GO:0051445	16	0.69196	1.20162	0.245783	0.869864
POSITIVE REGULATION OF G2/M TRANSITION OF MITOTIC CELL CYCLE GOBP GO:0010971	19	0.670578	1.20118	0.233918	0.869709
REGULATION OF REACTIVE OXYGEN SPECIES METABOLIC PROCESS GOBP GO:2000377	87	0.501807	1.2011	0.0984848	0.868107
TRAF6 MEDIATED IRF7 ACTIVATION REACTOME DATABASE ID RELEASE 71 933541	15	0.675017	1.20086	0.233244	0.867177
OVARIAN INFERTILITY GENES WIKIPATHWAYS_20191210 WP34 HOMO SAPIENS	21	0.645039	1.2006	0.235294	0.866434
OSSIFICATION GOBP GO:0001503	98	0.492915	1.19959	0.13617	0.868905
LIMBIC SYSTEM DEVELOPMENT GOBP GO:0021761	17	0.684616	1.19671	0.251968	0.878979
NEGATIVE REGULATION OF PROTEIN POLYMERIZATION GOBP GO:0032272	34	0.586838	1.19669	0.186782	0.877165
BIOCARTA_CARDIACEGF_PATHWAY MSIGDB_C2 BIOCARTA_CARDIACEGF_PATHWAY	16	0.672162	1.1962	0.263427	0.877445
POSITIVE REGULATION OF CELL MIGRATION INVOLVED IN SPROUTING ANGIOGENESIS GOBP GO:0090050	17	0.658744	1.19604	0.226131	0.876296
PID_RAS_PATHWAY MSIGDB_C2 PID_RAS_PATHWAY	22	0.621052	1.19596	0.251337	0.874704
REGULATION OF MYELOID CELL DIFFERENTIATION GOBP GO:0045637	114	0.49231	1.19591	0.137615	0.873055
PHASE 0 - RAPID DEPOLARISATION REACTOME DATABASE ID RELEASE 71 5576892	20	0.653489	1.19549	0.232044	0.872976
RENAL TUBULE MORPHOGENESIS GOBP GO:0061333	24	0.620513	1.19513	0.235872	0.872657
REGULATION OF HORMONE METABOLIC PROCESS GOBP GO:0032350	23	0.62631	1.19492	0.247126	0.871585
2'-DEOXYRIBONUCLEOTIDE METABOLIC PROCESS GOBP GO:0009394	22	0.631385	1.19458	0.211796	0.87115
NUCLEOBASE METABOLIC PROCESS GOBP GO:0009112	23	0.622106	1.19409	0.260753	0.87128
TELENCEPHALON CELL MIGRATION GOBP GO:0022029	15	0.66694	1.19283	0.259259	0.874655
REGULATION OF ALCOHOL BIOSYNTHETIC PROCESS GOBP GO:1902930	56	0.531461	1.19275	0.157556	0.87312
THROMBOXANE A2 RECEPTOR SIGNALING PATHWAY INTERACTION DATABASE NCI-NATURE CURATED DATA THROMBOXANE A2 RECEPTOR SIGNALING	37	0.578522	1.19176	0.217252	0.875427
REGULATION OF MONOOXYGENASE ACTIVITY GOBP GO:0032768	35	0.567633	1.19013	0.206395	0.880449
BIOCARTA_ACTINY_PATHWAY MSIGDB_C2 BIOCARTA_ACTINY_PATHWAY	18	0.64446	1.18987	0.255208	0.879799
SEMA3A PAK DEPENDENT AXON REPULSION REACTOME R-HSA-399954.2	16	0.674424	1.18971	0.263566	0.878622
HISTONE H4-K16 ACETYLATION GOBP GO:0043984	19	0.646067	1.18961	0.246649	0.877197
POSITIVE CHEMOTAXIS GOBP GO:0050918	15	0.689727	1.18924	0.282116	0.877012
REGULATION OF GLUTAMATE RECEPTOR SIGNALING PATHWAY GOBP GO:1900449	26	0.608045	1.18897	0.233236	0.876318
REGULATION OF SYNAPTIC VESICLE TRANSPORT GOBP GO:1902803	23	0.624498	1.18725	0.232955	0.881774
HALLMARK_PROTEIN_SECRETION MSIGDB_C2 HALLMARK_PROTEIN_SECRETION	91	0.497522	1.18701	0.15625	0.881023
REGULATION OF PROTEIN COMPLEX DISASSEMBLY GOBP GO:0043244	75	0.513981	1.18688	0.169611	0.879663
SPECIFICATION OF SYMMETRY GOBP GO:0009799	45	0.551724	1.18679	0.207831	0.878177
SYNAPTIC VESICLE PATHWAY WIKIPATHWAYS_20191210 WP2267 HOMO SAPIENS	32	0.592402	1.18654	0.216463	0.877456
BETA-CATENIN-TCF COMPLEX ASSEMBLY GOBP GO:1904837	27	0.601983	1.18638	0.222222	0.876218
CXCR4 IOB CXCR4	80	0.499393	1.18487	0.148014	0.880461
REGULATION OF POSTTRANSCRIPTIONAL GENE SILENCING GOBP GO:0060147	72	0.506536	1.18457	0.140426	0.879994
DEOXYRIBOSE PHOSPHATE METABOLIC PROCESS GOBP GO:0019692	22	0.631385	1.18418	0.264264	0.879749
ASSOCIATION BETWEEN PHYSICO-CHEMICAL FEATURES AND TOXICITY ASSOCIATED PATHWAYS WIKIPATHWAYS_20191210 WP3680 HOMO SAPIENS	52	0.54002	1.18375	0.190635	0.879744
HETEROCHROMATIN ORGANIZATION GOBP GO:0070828	16	0.669368	1.1832	0.240602	0.88009
HISTONE H4-K8 ACETYLATION GOBP GO:0043982	15	0.673363	1.18315	0.251799	0.878504
REGULATION OF GENE SILENCING BY RNA GOBP GO:0060966	72	0.506536	1.18314	0.156146	0.876771
NUCLEUS ORGANIZATION GOBP GO:0006997	88	0.491582	1.18265	0.145455	0.876865
BUTYRATE RESPONSE FACTOR 1 (BRF1) BINDS AND DESTABILIZES MRNA REACTOME DATABASE ID RELEASE 71 450385	16	0.648543	1.1824	0.265625	0.876046
REGULATION OF BIOMINERAL TISSUE DEVELOPMENT GOBP GO:0070167	55	0.536917	1.18192	0.186851	0.876262
ANGIOGENESIS WIKIPATHWAYS_20191210 WP1539 HOMO SAPIENS	21	0.625095	1.18166	0.257218	0.875551
EXTRACELLULAR MATRIX ORGANIZATION REACTOME DATABASE ID RELEASE 71 1474244	206	0.443832	1.18166	0.0731707	0.873803
POSITIVE REGULATION OF EXTRINSIC APOPTOTIC SIGNALING PATHWAY GOBP GO:2001238	27	0.590848	1.18153	0.241192	0.872622
NABA_ECM_AFFILIATED MSIGDB_C2 NABA_ECM_AFFILIATED	78	0.500425	1.181	0.152249	0.873095
REGULATION OF CARDIAC MUSCLE TISSUE DEVELOPMENT GOBP GO:0055024	28	0.599665	1.18094	0.245014	0.871566
NEGATIVE REGULATION OF LEUKOCYTE DIFFERENTIATION GOBP GO:1902106	38	0.561653	1.18078	0.209632	0.870504
RENAL TUBULE DEVELOPMENT GOBP GO:0061326	26	0.607383	1.18064	0.247839	0.869332
SIGNALLING TO RAS REACTOME DATABASE ID RELEASE 71 167044	16	0.65599	1.18049	0.264631	0.868256
NEGATIVE REGULATION OF IMMUNE SYSTEM PROCESS GOBP GO:0002683	200	0.453918	1.18024	0.0787879	0.867579
NEGATIVE REGULATION OF LEUKOCYTE CELL-CELL ADHESION GOBP GO:1903038	49	0.546146	1.18013	0.20678	0.866323
NABA_MATRISOME_ASSOCIATED MSIGDB_C2 NABA_MATRISOME_ASSOCIATED	346	0.425915	1.17988	0.0576923	0.865581
GLUCOSE 6-PHOSPHATE METABOLIC PROCESS GOBP GO:0051156	18	0.651339	1.17943	0.257812	0.865596
GENE SILENCING BY RNA REACTOME DATABASE ID RELEASE 71 211000	67	0.51862	1.17941	0.189831	0.864016
POSITIVE REGULATION OF PROTEIN KINASE B SIGNALING GOBP GO:0051897	93	0.483683	1.17875	0.142308	0.864951
BREAST CANCER PATHWAY WIKIPATHWAYS_20191210 WP4262 HOMO SAPIENS	121	0.466625	1.17772	0.117647	0.867534
GLUTAMATE SECRETION GOBP GO:0014047	18	0.63875	1.17738	0.276486	0.867259
POSITIVE REGULATION OF ERBB SIGNALING PATHWAY GOBP GO:1901186	19	0.629004	1.17738	0.239899	0.865588
PYRIMIDINE NUCLEOSIDE METABOLIC PROCESS GOBP GO:0006213	23	0.617282	1.17717	0.261765	0.864759
PID_TCPTP_PATHWAY MSIGDB_C2 PID_TCPTP_PATHWAY	37	0.561693	1.17713	0.202899	0.863264
POSITIVE REGULATION OF FAT CELL DIFFERENTIATION GOBP GO:0045600	35	0.569496	1.17711	0.216393	0.861679
POSITIVE REGULATION OF JUN KINASE ACTIVITY GOBP GO:0043507	42	0.548067	1.176	0.226744	0.864757
SIGNALLING TO ERKS REACTOME R-HSA-187687.1	29	0.5924	1.17593	0.228412	0.863426
REGULATION OF STEROID BIOSYNTHETIC PROCESS GOBP GO:0050810	61	0.52713	1.17566	0.167857	0.862783
CENTRIOLE ASSEMBLY GOBP GO:0098534	20	0.63256	1.17515	0.244216	0.863149
REGULATION OF MYOBLAST DIFFERENTIATION GOBP GO:0045661	21	0.63046	1.17495	0.249284	0.862196
POSITIVE REGULATION OF TRANSCRIPTION ELONGATION FROM RNA POLYMERASE II PROMOTER GOBP GO:0032968	17	0.658118	1.17438	0.283117	0.862762
REGULATION OF LIPASE ACTIVITY GOBP GO:0060191	50	0.518451	1.17378	0.185185	0.863575
POSITIVE REGULATION OF EXOCYTOSIS GOBP GO:0045921	50	0.540239	1.17298	0.197324	0.865087
POSITIVE REGULATION OF MITOCHONDRION ORGANIZATION GOBP GO:0010822	95	0.489497	1.1715	0.138211	0.869143
NEGATIVE REGULATION OF LYMPHOCYTE ACTIVATION GOBP GO:0051250	55	0.531755	1.17145	0.221154	0.867686
POSITIVE REGULATION OF EMBRYONIC DEVELOPMENT GOBP GO:0040019	20	0.625847	1.17024	0.259366	0.870745
DETERMINATION OF BILATERAL SYMMETRY GOBP GO:0009855	44	0.557669	1.17004	0.224551	0.869914
HEMATOPOIETIC PROGENITOR CELL DIFFERENTIATION GOBP GO:0002244	21	0.616868	1.16912	0.245232	0.871903
EAR MORPHOGENESIS GOBP GO:0042471	19	0.630408	1.16855	0.267016	0.872563
FOREBRAIN CELL MIGRATION GOBP GO:0021885	16	0.663991	1.16816	0.286458	0.87251
REGULATION OF ACTIN NUCLEATION GOBP GO:0051125	20	0.637961	1.16724	0.268817	0.874648
COLLAGEN FORMATION REACTOME DATABASE ID RELEASE 71 1474290	66	0.519228	1.16678	0.180851	0.874884
POSITIVE REGULATION OF DNA METABOLIC PROCESS GOBP GO:0051054	177	0.453653	1.16619	0.101695	0.875492
HALLMARK_UV_RESPONSE_DN MSIGDB_C2 HALLMARK_UV_RESPONSE_DN	137	0.463986	1.16614	0.153509	0.874021
SIGNALING EVENTS MEDIATED BY FOCAL ADHESION KINASE PATHWAY INTERACTION DATABASE NCI-NATURE CURATED DATA SIGNALING EVENTS MEDIATED BY FOCAL ADHESION KINASE	52	0.52439	1.16517	0.197133	0.876145
REGULATION OF EXTRINSIC APOPTOTIC SIGNALING PATHWAY GOBP GO:2001236	87	0.487375	1.16504	0.158103	0.875078
POSITIVE REGULATION OF PHOSPHATIDYLINOSITOL 3-KINASE ACTIVITY GOBP GO:0043552	21	0.643877	1.16457	0.275591	0.875288
REGULATION OF MICROTUBULE CYTOSKELETON WIKIPATHWAYS_20191210 WP2038 HOMO SAPIENS	42	0.553867	1.16415	0.22093	0.875234
TRANSCRIPTIONAL REGULATION BY SMALL RNAS REACTOME DATABASE ID RELEASE 71 5578749	47	0.537748	1.1638	0.229851	0.875127
INACTIVATION OF MAPK ACTIVITY GOBP GO:0000188	20	0.642476	1.16364	0.264305	0.874138
ESTABLISHMENT OF EPITHELIAL CELL POLARITY GOBP GO:0090162	20	0.649873	1.16327	0.275132	0.873996
REGULATION OF CARTILAGE DEVELOPMENT GOBP GO:0061035	29	0.597801	1.16316	0.247761	0.872884
G ALPHA (Q) SIGNALLING EVENTS REACTOME R-HSA-416476.6	105	0.470621	1.16275	0.160714	0.872924
MRNA DECAY BY 3' TO 5' EXORIBONUCLEASE REACTOME R-HSA-429958.2	15	0.672571	1.16248	0.284653	0.872509
SKELETAL SYSTEM DEVELOPMENT GOBP GO:0001501	174	0.446747	1.16175	0.0755814	0.874056
SIGNAL TRANSDUCTION INVOLVED IN CELL CYCLE CHECKPOINT GOBP GO:0072395	69	0.501897	1.16116	0.193182	0.874816
SENSORY PERCEPTION OF SOUND GOBP GO:0007605	41	0.542476	1.16086	0.235632	0.874487
REGULATION OF MEGAKARYOCYTE DIFFERENTIATION GOBP GO:0045652	44	0.556825	1.16059	0.238411	0.873816
POSITIVE REGULATION OF MUSCLE ORGAN DEVELOPMENT GOBP GO:0048636	25	0.59245	1.16052	0.275568	0.87253
HISTONE H4-K5 ACETYLATION GOBP GO:0043981	15	0.673363	1.16008	0.281654	0.872687
NEGATIVE REGULATION OF BLOOD VESSEL ENDOTHELIAL CELL MIGRATION GOBP GO:0043537	29	0.59771	1.15993	0.252717	0.87165
BIOCARTA_RACCYCD_PATHWAY MSIGDB_C2 BIOCARTA_RACCYCD_PATHWAY	26	0.610553	1.15921	0.276423	0.872935
NEGATIVE REGULATION OF MUSCLE CELL DIFFERENTIATION GOBP GO:0051148	29	0.579034	1.15889	0.254098	0.872585
REGULATION OF LIPID CATABOLIC PROCESS GOBP GO:0050994	20	0.617582	1.15844	0.294278	0.872852
OTHER INTERLEUKIN SIGNALING REACTOME DATABASE ID RELEASE 71 449836	16	0.656975	1.15783	0.274194	0.873612
REGULATION OF CHONDROCYTE DIFFERENTIATION GOBP GO:0032330	23	0.596806	1.15736	0.282421	0.873821
CANONICAL AND NON-CANONICAL NOTCH SIGNALING WIKIPATHWAYS_20191210 WP3845 HOMO SAPIENS	21	0.619022	1.15728	0.272237	0.872571
REGULATION OF APOPTOSIS BY PARATHYROID HORMONE-RELATED PROTEIN WIKIPATHWAYS_20191210 WP3872 HOMO SAPIENS	17	0.639672	1.1571	0.286104	0.871724
HALLMARK_TNFA_SIGNALING_VIA_NFKB MSIGDB_C2 HALLMARK_TNFA_SIGNALING_VIA_NFKB	168	0.450687	1.15594	0.110429	0.874743
NEPHRON TUBULE DEVELOPMENT GOBP GO:0072080	24	0.614366	1.15531	0.261261	0.875712
CELLULAR RESPONSE TO METAL ION GOBP GO:0071248	64	0.500165	1.15385	0.226837	0.879943
NEGATIVE REGULATION OF DNA BINDING GOBP GO:0043392	32	0.581165	1.15343	0.251381	0.880069
ASSEMBLY OF COLLAGEN FIBRILS AND OTHER MULTIMERIC STRUCTURES REACTOME DATABASE ID RELEASE 71 2022090	39	0.547761	1.15308	0.238095	0.879939
RNA DESTABILIZATION GOBP GO:0050779	24	0.601098	1.15304	0.259036	0.878516
NABA_SECRETED_FACTORS MSIGDB_C2 NABA_SECRETED_FACTORS	137	0.449962	1.1529	0.152074	0.877496
MICROTUBULE BUNDLE FORMATION GOBP GO:0001578	52	0.519741	1.15266	0.213166	0.876853
ASSEMBLY AND CELL SURFACE PRESENTATION OF NMDA RECEPTORS REACTOME R-HSA-9609736.2	15	0.665122	1.15222	0.320574	0.877068
SENSORY ORGAN MORPHOGENESIS GOBP GO:0090596	65	0.504017	1.15209	0.192053	0.876002
BIOCARTA_AT1R_PATHWAY MSIGDB_C2 BIOCARTA_AT1R_PATHWAY	30	0.580652	1.15177	0.252174	0.875675
CHROMATIN ASSEMBLY OR DISASSEMBLY GOBP GO:0006333	92	0.486373	1.15112	0.18	0.876823
BILE ACID AND BILE SALT METABOLISM REACTOME DATABASE ID RELEASE 71 194068	23	0.603307	1.15103	0.282857	0.87564
REGULATION OF SEQUESTERING OF CALCIUM ION GOBP GO:0051282	60	0.513325	1.14922	0.232082	0.881194
NEGATIVE REGULATION OF HISTONE MODIFICATION GOBP GO:0031057	28	0.586188	1.14915	0.268493	0.879912
PYRIMIDINE-CONTAINING COMPOUND CATABOLIC PROCESS GOBP GO:0072529	27	0.595031	1.14862	0.260504	0.880416
REGULATION OF HEMOPOIESIS GOBP GO:1903706	237	0.427476	1.14849	0.107383	0.879419
NEGATIVE REGULATION OF CELL MORPHOGENESIS INVOLVED IN DIFFERENTIATION GOBP GO:0010771	46	0.548284	1.14847	0.244966	0.877971
LXRS REGULATE GENE EXPRESSION LINKED TO CHOLESTEROL TRANSPORT AND EFFLUX REACTOME R-HSA-9029569.1	28	0.595332	1.14846	0.270588	0.876506
SIGNAL TRANSDUCTION INVOLVED IN MITOTIC DNA DAMAGE CHECKPOINT GOBP GO:1902402	55	0.512328	1.14838	0.215152	0.875368
AMINO ACID TRANSPORT GOBP GO:0006865	66	0.505524	1.14824	0.215686	0.87442
PID_FAK_PATHWAY MSIGDB_C2 PID_FAK_PATHWAY	53	0.523568	1.14726	0.263492	0.876773
PID_P53_DOWNSTREAM_PATHWAY MSIGDB_C2 PID_P53_DOWNSTREAM_PATHWAY	118	0.462762	1.14651	0.186869	0.878095
POSITIVE REGULATION OF MUSCLE TISSUE DEVELOPMENT GOBP GO:1901863	25	0.59245	1.14639	0.292264	0.877078
PKMTS METHYLATE HISTONE LYSINES REACTOME R-HSA-3214841.3	42	0.539726	1.14615	0.230769	0.876499
POSITIVE REGULATION OF STRIATED MUSCLE TISSUE DEVELOPMENT GOBP GO:0045844	25	0.59245	1.1461	0.27809	0.875166
HALLMARK_XENOBIOTIC_METABOLISM MSIGDB_C2 HALLMARK_XENOBIOTIC_METABOLISM	140	0.447966	1.14585	0.162562	0.874579
POSITIVE REGULATION OF INTRACELLULAR PROTEIN TRANSPORT GOBP GO:0090316	115	0.456141	1.1451	0.185185	0.876024
POSITIVE REGULATION OF LIPID KINASE ACTIVITY GOBP GO:0090218	24	0.611009	1.14469	0.286908	0.876086
REGULATION OF GENE SILENCING BY MIRNA GOBP GO:0060964	71	0.506672	1.14432	0.225	0.87602
EMBRYONIC EYE MORPHOGENESIS GOBP GO:0048048	15	0.657147	1.14393	0.291667	0.876003
MESONEPHRIC TUBULE MORPHOGENESIS GOBP GO:0072171	16	0.652147	1.14323	0.30663	0.87724
REGULATION OF PROTEIN TARGETING TO MEMBRANE GOBP GO:0090313	23	0.578455	1.14298	0.290598	0.876696
CELLULAR RESPONSE TO GLUCOSE STIMULUS GOBP GO:0071333	22	0.609269	1.14218	0.290761	0.878294
NEGATIVE REGULATION OF DEVELOPMENTAL GROWTH GOBP GO:0048640	41	0.534194	1.14178	0.26129	0.878359
POSITIVE REGULATION OF PROTEIN TYROSINE KINASE ACTIVITY GOBP GO:0061098	27	0.584502	1.14154	0.271003	0.877891
INTRACELLULAR SIGNAL TRANSDUCTION INVOLVED IN G1 DNA DAMAGE CHECKPOINT GOBP GO:1902400	55	0.512328	1.14106	0.211604	0.878156
POSITIVE REGULATION OF PROTEIN TARGETING TO MITOCHONDRION GOBP GO:1903955	29	0.578824	1.14103	0.288288	0.876853
REGULATION OF MORPHOGENESIS OF AN EPITHELIUM GOBP GO:1905330	117	0.461283	1.14081	0.17	0.876305
REGULATION OF ACTIN FILAMENT POLYMERIZATION GOBP GO:0030833	96	0.476363	1.13977	0.221739	0.878772
BIOCARTA_PDGF_PATHWAY MSIGDB_C2 BIOCARTA_PDGF_PATHWAY	27	0.57094	1.13949	0.271642	0.878397
NEGATIVE REGULATION OF T CELL ACTIVATION GOBP GO:0050868	42	0.538581	1.13856	0.272727	0.880515
PID_IL2_PI3K_PATHWAY MSIGDB_C2 PID_IL2_PI3K_PATHWAY	26	0.590276	1.13804	0.29096	0.881097
PRODUCTION OF MIRNAS INVOLVED IN GENE SILENCING BY MIRNA GOBP GO:0035196	22	0.612616	1.13787	0.275325	0.880337
REGULATION OF VASCULAR ENDOTHELIAL CELL PROLIFERATION GOBP GO:1905562	15	0.654538	1.13689	0.31746	0.88251
GLYCOPROTEIN CATABOLIC PROCESS GOBP GO:0006516	16	0.640768	1.13619	0.319588	0.883605
NEGATIVE REGULATION OF CYTOKINE-MEDIATED SIGNALING PATHWAY GOBP GO:0001960	32	0.563298	1.1361	0.267442	0.882481
MRNA DESTABILIZATION GOBP GO:0061157	23	0.601248	1.13556	0.302857	0.883144
SIGNAL TRANSDUCTION INVOLVED IN MITOTIC G1 DNA DAMAGE CHECKPOINT GOBP GO:0072431	55	0.512328	1.1352	0.26087	0.883012
E2F TRANSCRIPTION FACTOR NETWORK PATHWAY INTERACTION DATABASE NCI-NATURE CURATED DATA E2F TRANSCRIPTION FACTOR NETWORK	64	0.496295	1.13468	0.234432	0.883488
NOTCH SIGNALING WIKIPATHWAYS_20191210 WP268 HOMO SAPIENS	37	0.539921	1.13451	0.236593	0.882737
HYPOTHESIZED PATHWAYS IN PATHOGENESIS OF CARDIOVASCULAR DISEASE WIKIPATHWAYS_20191210 WP3668 HOMO SAPIENS	24	0.601616	1.13431	0.305638	0.882094
LYSOSOMAL TRANSPORT GOBP GO:0007041	83	0.480822	1.13427	0.235294	0.880812
REGULATION OF BEHAVIOR GOBP GO:0050795	25	0.591963	1.13347	0.288515	0.882385
POSITIVE REGULATION OF CYTOKINE-MEDIATED SIGNALING PATHWAY GOBP GO:0001961	22	0.606016	1.13341	0.289256	0.881174
CHROMATIN ORGANIZATION REACTOME DATABASE ID RELEASE 71 4839726	198	0.423777	1.13299	0.131429	0.881379
EXTRACELLULAR VESICLE-MEDIATED SIGNALING IN RECIPIENT CELLS WIKIPATHWAYS_20191210 WP2870 HOMO SAPIENS	25	0.590615	1.13288	0.3	0.880406
CARGO CONCENTRATION IN THE ER REACTOME DATABASE ID RELEASE 71 5694530	26	0.586747	1.13287	0.283708	0.879027
NEGATIVE REGULATION OF RHO PROTEIN SIGNAL TRANSDUCTION GOBP GO:0035024	17	0.635535	1.13267	0.340541	0.87832
RESPONSE TO IONIZING RADIATION GOBP GO:0010212	83	0.470766	1.13232	0.172414	0.878209
REGULATION OF EPIDERMAL GROWTH FACTOR-ACTIVATED RECEPTOR ACTIVITY GOBP GO:0007176	18	0.621125	1.13135	0.328084	0.880478
MICROTUBULE POLYMERIZATION OR DEPOLYMERIZATION GOBP GO:0031109	39	0.544373	1.13131	0.241176	0.879237
HALLMARK_E2F_TARGETS MSIGDB_C2 HALLMARK_E2F_TARGETS	197	0.425533	1.13102	0.0981595	0.878885
POSITIVE REGULATION OF NUCLEOCYTOPLASMIC TRANSPORT GOBP GO:0046824	43	0.52181	1.13061	0.26935	0.879053
PRODUCTION OF SMALL RNA INVOLVED IN GENE SILENCING BY RNA GOBP GO:0070918	24	0.595659	1.13056	0.293011	0.877858
APOPTOSIS MODULATION AND SIGNALING WIKIPATHWAYS_20191210 WP1772 HOMO SAPIENS	73	0.49504	1.13016	0.237154	0.877942
POSITIVE REGULATION OF EPIDERMIS DEVELOPMENT GOBP GO:0045684	16	0.62047	1.13009	0.339779	0.876796
RNA STABILIZATION GOBP GO:0043489	36	0.549226	1.12993	0.262997	0.875983
CHROMATIN ASSEMBLY GOBP GO:0031497	75	0.488594	1.12931	0.225092	0.876947
POSITIVE REGULATION OF ESTABLISHMENT OF PROTEIN LOCALIZATION TO MITOCHONDRION GOBP GO:1903749	51	0.515916	1.12795	0.256493	0.880652
GASTRIN SIGNALING PATHWAY WIKIPATHWAYS_20191210 WP4659 HOMO SAPIENS	100	0.461886	1.12735	0.187755	0.881476
SIGNAL TRANSDUCTION INVOLVED IN MITOTIC DNA INTEGRITY CHECKPOINT GOBP GO:1902403	55	0.512328	1.12706	0.235294	0.881222
PID_AURORA_B_PATHWAY MSIGDB_C2 PID_AURORA_B_PATHWAY	38	0.54084	1.12675	0.274286	0.880939
HEMOSTASIS REACTOME R-HSA-109582.2	401	0.39421	1.12628	0.0326087	0.881283
CEREBRAL CORTEX DEVELOPMENT GOBP GO:0021987	34	0.557815	1.12592	0.295181	0.881207
CRANIAL SKELETAL SYSTEM DEVELOPMENT GOBP GO:1904888	17	0.622847	1.1256	0.320707	0.881068
DSRNA PROCESSING GOBP GO:0031050	24	0.595659	1.12514	0.315951	0.881329
MET IN TYPE 1 PAPILLARY RENAL CELL CARCINOMA WIKIPATHWAYS_20191210 WP4205 HOMO SAPIENS	53	0.515035	1.12509	0.257426	0.880164
CELL CYCLE G1/S PHASE TRANSITION GOBP GO:0044843	99	0.471639	1.12499	0.238095	0.879115
NEGATIVE REGULATION OF RESPONSE TO OXIDATIVE STRESS GOBP GO:1902883	29	0.560748	1.12497	0.269461	0.877782
PORE COMPLEX ASSEMBLY GOBP GO:0046931	18	0.616664	1.12482	0.316804	0.876949
PATTERN SPECIFICATION PROCESS GOBP GO:0007389	125	0.44996	1.12482	0.20082	0.875593
CELLULAR RESPONSE TO AMINO ACID STIMULUS GOBP GO:0071230	30	0.559455	1.12465	0.293605	0.87482
REGULATION OF BMP SIGNALING PATHWAY GOBP GO:0030510	42	0.526115	1.12426	0.278638	0.874996
REGULATION OF CELLULAR KETONE METABOLIC PROCESS GOBP GO:0010565	119	0.449429	1.12417	0.185841	0.873986
BONE DEVELOPMENT GOBP GO:0060348	67	0.496987	1.12372	0.234201	0.874293
TP53 REGULATES TRANSCRIPTION OF ADDITIONAL CELL CYCLE GENES WHOSE EXACT ROLE IN THE P53 PATHWAY REMAIN UNCERTAIN REACTOME DATABASE ID RELEASE 71 6804115	21	0.606371	1.12339	0.338889	0.874133
TRIGLYCERIDE METABOLIC PROCESS GOBP GO:0006641	21	0.600771	1.12249	0.302949	0.876106
CELL MORPHOGENESIS INVOLVED IN DIFFERENTIATION GOBP GO:0000904	272	0.409594	1.12201	0.12605	0.876476
ERBB1 DOWNSTREAM SIGNALING PATHWAY INTERACTION DATABASE NCI-NATURE CURATED DATA ERBB1 DOWNSTREAM SIGNALING	98	0.462756	1.1217	0.205021	0.87629
TRABECULA MORPHOGENESIS GOBP GO:0061383	18	0.601955	1.12091	0.334197	0.877868
POSITIVE REGULATION OF HEMOPOIESIS GOBP GO:1903708	87	0.475651	1.12019	0.241667	0.879113
NUCLEAR IMPORT OF REV PROTEIN REACTOME R-HSA-180746.1	28	0.575044	1.1199	0.301724	0.878872
PID_E2F_PATHWAY MSIGDB_C2 PID_E2F_PATHWAY	64	0.496295	1.119	0.237354	0.880934
POSITIVE REGULATION OF CELL CYCLE ARREST GOBP GO:0071158	70	0.482713	1.11885	0.238754	0.880154
REGULATION OF RUFFLE ASSEMBLY GOBP GO:1900027	18	0.615089	1.11845	0.324675	0.880379
CHROMATIN MODIFYING ENZYMES REACTOME R-HSA-3247509.4	198	0.423777	1.11804	0.127168	0.880567
MRNA STABILIZATION GOBP GO:0048255	29	0.555814	1.1173	0.288714	0.882065
HALLMARK_COAGULATION MSIGDB_C2 HALLMARK_COAGULATION	92	0.467563	1.11715	0.214876	0.881243
SIGNAL TRANSDUCTION INVOLVED IN MITOTIC CELL CYCLE CHECKPOINT GOBP GO:0072413	55	0.512328	1.11641	0.265018	0.882635
INTERFERON ALPHA BETA SIGNALING REACTOME R-HSA-909733.2	34	0.565572	1.11582	0.285714	0.883392
SECRETORY GRANULE ORGANIZATION GOBP GO:0033363	15	0.643409	1.11557	0.336658	0.883031
MONOCARBOXYLIC ACID TRANSPORT GOBP GO:0015718	58	0.503863	1.11409	0.275	0.88729
NEGATIVE REGULATION OF SMALL MOLECULE METABOLIC PROCESS GOBP GO:0062014	51	0.513382	1.11309	0.2589	0.889628
NEGATIVE REGULATION OF UBIQUITIN-DEPENDENT PROTEIN CATABOLIC PROCESS GOBP GO:2000059	37	0.53798	1.11295	0.297935	0.888809
NEGATIVE REGULATION OF RNA CATABOLIC PROCESS GOBP GO:1902369	45	0.514423	1.11291	0.268371	0.887648
TELOMERE MAINTENANCE REACTOME R-HSA-157579.2	41	0.535966	1.11251	0.277286	0.887823
MIRS IN MUSCLE CELL DIFFERENTIATION WIKIPATHWAYS_20191210 WP2012 HOMO SAPIENS	18	0.609582	1.11247	0.313673	0.886618
NEGATIVE REGULATION OF ORGANELLE ORGANIZATION GOBP GO:0010639	245	0.40374	1.11227	0.1125	0.886038
MODULATION OF CHEMICAL SYNAPTIC TRANSMISSION GOBP GO:0050804	141	0.428597	1.11207	0.183962	0.885442
PHOTODYNAMIC THERAPY-INDUCED NFE2L2 (NRF2) SURVIVAL SIGNALING WIKIPATHWAYS_20191210 WP3612 HOMO SAPIENS	20	0.603908	1.11112	0.329298	0.887567
IL-6 SIGNALING PATHWAY WIKIPATHWAYS_20191210 WP364 HOMO SAPIENS	39	0.522423	1.10832	0.281337	0.896516
POSITIVE REGULATION OF PHOSPHOLIPID METABOLIC PROCESS GOBP GO:1903727	29	0.574884	1.10766	0.31856	0.897695
ENDOTHELIN PATHWAYS WIKIPATHWAYS_20191210 WP2197 HOMO SAPIENS	25	0.564944	1.1074	0.297297	0.897291
CHROMOSOME CONDENSATION GOBP GO:0030261	25	0.565351	1.10703	0.310777	0.897361
GLIOGENESIS GOBP GO:0042063	70	0.482194	1.10683	0.262963	0.896788
HISTONE ACETYLATION GOBP GO:0016573	73	0.473687	1.1066	0.270588	0.896395
NEGATIVE REGULATION OF MYELOID LEUKOCYTE DIFFERENTIATION GOBP GO:0002762	16	0.619896	1.10658	0.359102	0.895176
NEURON PROJECTION ORGANIZATION GOBP GO:0106027	26	0.570978	1.10654	0.333333	0.893966
PID_INTEGRIN1_PATHWAY MSIGDB_C2 PID_INTEGRIN1_PATHWAY	56	0.498655	1.10641	0.261993	0.893182
GLUTAMATE NEUROTRANSMITTER RELEASE CYCLE REACTOME DATABASE ID RELEASE 71 210500	16	0.6211	1.10595	0.316623	0.893612
SENSORY PERCEPTION OF MECHANICAL STIMULUS GOBP GO:0050954	43	0.526354	1.10529	0.285266	0.894809
PID_AVB3_INTEGRIN_PATHWAY MSIGDB_C2 PID_AVB3_INTEGRIN_PATHWAY	62	0.483051	1.1052	0.262069	0.893855
G1/S TRANSITION OF MITOTIC CELL CYCLE GOBP GO:0000082	97	0.45501	1.10478	0.266409	0.894124
CELLULAR RESPONSE TO IONIZING RADIATION GOBP GO:0071479	44	0.515447	1.10399	0.303797	0.89566
URETERIC BUD DEVELOPMENT GOBP GO:0001657	20	0.577395	1.1039	0.333333	0.894659
NEGATIVE REGULATION OF NEURON DIFFERENTIATION GOBP GO:0045665	79	0.469404	1.10247	0.259928	0.898732
NEGATIVE REGULATION OF RESPONSE TO EXTERNAL STIMULUS GOBP GO:0032102	158	0.435654	1.10163	0.23445	0.900363
INTERNAL PEPTIDYL-LYSINE ACETYLATION GOBP GO:0018393	75	0.472666	1.10156	0.265957	0.899303
CHONDROCYTE DIFFERENTIATION GOBP GO:0002062	33	0.542432	1.10119	0.28869	0.899353
AURORA B SIGNALING PATHWAY INTERACTION DATABASE NCI-NATURE CURATED DATA AURORA B SIGNALING	38	0.54084	1.10085	0.308411	0.899362
MITOTIC DNA INTEGRITY CHECKPOINT GOBP GO:0044774	94	0.455626	1.10063	0.221402	0.898817
POSITIVE REGULATION OF PROTEIN TARGETING TO MEMBRANE GOBP GO:0090314	21	0.589469	1.10052	0.337047	0.898005
DNA REPLICATION CHECKPOINT GOBP GO:0000076	15	0.626651	1.10019	0.344737	0.897802
TRANSCRIPTION BY RNA POLYMERASE III GOBP GO:0006383	30	0.552818	1.09941	0.336232	0.899455
CELL FATE SPECIFICATION GOBP GO:0001708	16	0.616752	1.09922	0.374684	0.898846
NEGATIVE REGULATION OF MAP KINASE ACTIVITY GOBP GO:0043407	52	0.493855	1.09892	0.297125	0.898677
RESPONSE TO AMINO ACID GOBP GO:0043200	33	0.5428	1.09754	0.301408	0.902716
REGULATION OF HORMONE SECRETION GOBP GO:0046883	106	0.445312	1.09624	0.229839	0.906271
PHOSPHATIDYLCHOLINE BIOSYNTHETIC PROCESS GOBP GO:0006656	25	0.560754	1.09591	0.344311	0.906325
REGULATION OF EARLY ENDOSOME TO LATE ENDOSOME TRANSPORT GOBP GO:2000641	17	0.612466	1.09552	0.357895	0.906588
NEGATIVE REGULATION OF AXON EXTENSION GOBP GO:0030517	22	0.583929	1.09547	0.350282	0.905479
NADP METABOLIC PROCESS GOBP GO:0006739	21	0.585246	1.09486	0.335135	0.906481
CELL MORPHOGENESIS GOBP GO:0000902	352	0.396878	1.09446	0.127907	0.906724
NEGATIVE REGULATION OF SECRETION BY CELL GOBP GO:1903531	79	0.464086	1.09412	0.286765	0.906711
HALLMARK_DNA_REPAIR MSIGDB_C2 HALLMARK_DNA_REPAIR	140	0.43353	1.0937	0.258373	0.906936
NEGATIVE REGULATION OF CELLULAR COMPONENT ORGANIZATION GOBP GO:0051129	434	0.383257	1.09361	0.075	0.905968
MESONEPHRIC EPITHELIUM DEVELOPMENT GOBP GO:0072163	21	0.577214	1.09299	0.351852	0.907039
NEGATIVE REGULATION OF PROTEIN DEPOLYMERIZATION GOBP GO:1901880	32	0.541697	1.09284	0.333333	0.906301
NEUTRAL LIPID METABOLIC PROCESS GOBP GO:0006638	41	0.507469	1.09281	0.317757	0.905115
SKELETAL MUSCLE TISSUE DEVELOPMENT GOBP GO:0007519	25	0.572997	1.09274	0.338889	0.904123
PEPTIDYL-LYSINE ACETYLATION GOBP GO:0018394	78	0.465219	1.09268	0.272085	0.903115
NEGATIVE REGULATION OF PROTEIN COMPLEX DISASSEMBLY GOBP GO:0043242	39	0.515233	1.0925	0.300633	0.90254
PEPTIDYL-TYROSINE MODIFICATION GOBP GO:0018212	54	0.491048	1.09204	0.271028	0.902913
PID_TELOMERASE_PATHWAY MSIGDB_C2 PID_TELOMERASE_PATHWAY	64	0.483304	1.09116	0.284247	0.904955
PEPTIDE CATABOLIC PROCESS GOBP GO:0043171	20	0.596872	1.09114	0.352304	0.903745
NEGATIVE REGULATION OF PROTEIN MODIFICATION PROCESS GOBP GO:0031400	369	0.385137	1.09104	0.108696	0.902826
NEGATIVE REGULATION OF RESPONSE TO BIOTIC STIMULUS GOBP GO:0002832	26	0.57359	1.09102	0.322165	0.901655
INTERNAL PROTEIN AMINO ACID ACETYLATION GOBP GO:0006475	78	0.466158	1.0909	0.291525	0.900824
MODULATION OF EXCITATORY POSTSYNAPTIC POTENTIAL GOBP GO:0098815	17	0.615711	1.08983	0.351562	0.903342
DOUBLE-STRAND BREAK REPAIR GOBP GO:0006302	162	0.41829	1.0898	0.211055	0.902223
CELL MIGRATION AND INVASION THROUGH P75NTR WIKIPATHWAYS_20191210 WP4561 HOMO SAPIENS	25	0.571842	1.08972	0.352459	0.901301
RAC1/PAK1/P38/MMP2 PATHWAY WIKIPATHWAYS_20191210 WP3303 HOMO SAPIENS	60	0.478252	1.08942	0.303249	0.901081
MEMBRANE BIOGENESIS GOBP GO:0044091	26	0.561431	1.08935	0.335294	0.900094
NEGATIVE REGULATION OF AXONOGENESIS GOBP GO:0050771	33	0.535045	1.08914	0.318452	0.899563
REGULATION OF DEFENSE RESPONSE TO VIRUS BY VIRUS GOBP GO:0050690	20	0.593564	1.08865	0.327869	0.900113
NEGATIVE REGULATION OF CYCLIN-DEPENDENT PROTEIN SERINE/THREONINE KINASE ACTIVITY GOBP GO:0045736	18	0.60324	1.08859	0.355932	0.899116
REGULATION OF TRANS-SYNAPTIC SIGNALING GOBP GO:0099177	142	0.428451	1.08837	0.241206	0.898765
REGULATION OF OSTEOCLAST DIFFERENTIATION GOBP GO:0045670	19	0.593831	1.08746	0.371353	0.900809
MITOTIC DNA DAMAGE CHECKPOINT GOBP GO:0044773	86	0.45683	1.0874	0.272727	0.899783
REGULATION OF VIRAL TRANSCRIPTION GOBP GO:0046782	55	0.481665	1.08671	0.317568	0.901015
INTERLEUKIN-10 SIGNALING REACTOME R-HSA-6783783.3	17	0.592775	1.08637	0.35567	0.901073
RXR AND RAR HETERODIMERIZATION WITH OTHER NUCLEAR RECEPTOR PATHWAY INTERACTION DATABASE NCI-NATURE CURATED DATA RXR AND RAR HETERODIMERIZATION WITH OTHER NUCLEAR RECEPTOR	24	0.568247	1.08554	0.35493	0.902793
RESPONSE TO GLUCOSE GOBP GO:0009749	36	0.524058	1.08553	0.327217	0.901571
REGULATION OF TELOMERASE PATHWAY INTERACTION DATABASE NCI-NATURE CURATED DATA REGULATION OF TELOMERASE	63	0.48735	1.08507	0.289037	0.902018
EPITHELIAL TUBE MORPHOGENESIS GOBP GO:0060562	106	0.439207	1.08506	0.269531	0.900847
REGULATION OF CELL-CELL ADHESION GOBP GO:0022407	192	0.407503	1.08498	0.234973	0.899952
POSITIVE REGULATION OF JNK CASCADE GOBP GO:0046330	84	0.462886	1.08482	0.275093	0.899285
NEURON PROJECTION GUIDANCE GOBP GO:0097485	135	0.421337	1.08438	0.229787	0.899668
REGULATION OF ESTABLISHMENT OR MAINTENANCE OF CELL POLARITY GOBP GO:0032878	18	0.58695	1.08437	0.355499	0.898502
BIOCARTA_CDC42RAC_PATHWAY MSIGDB_C2 BIOCARTA_CDC42RAC_PATHWAY	16	0.601564	1.08424	0.354217	0.897803
PROTEIN GLYCOSYLATION GOBP GO:0006486	151	0.417112	1.08422	0.181818	0.896655
BETA1 INTEGRIN CELL SURFACE INTERACTIONS PATHWAY INTERACTION DATABASE NCI-NATURE CURATED DATA BETA1 INTEGRIN CELL SURFACE INTERACTIONS	56	0.498655	1.08417	0.299652	0.895615
REGULATION OF SPROUTING ANGIOGENESIS GOBP GO:1903670	52	0.498103	1.08324	0.332215	0.897903
POSITIVE REGULATION OF PROTEIN COMPLEX DISASSEMBLY GOBP GO:0043243	23	0.568049	1.08293	0.351852	0.897799
NEGATIVE REGULATION OF MRNA CATABOLIC PROCESS GOBP GO:1902373	36	0.525563	1.08257	0.349162	0.897913
ENDOPLASMIC RETICULUM ORGANIZATION GOBP GO:0007029	44	0.500844	1.08252	0.322785	0.896887
MESONEPHRIC TUBULE DEVELOPMENT GOBP GO:0072164	21	0.577214	1.0821	0.372703	0.89712
MACROMOLECULE GLYCOSYLATION GOBP GO:0043413	151	0.417112	1.08152	0.253394	0.898068
REGULATION OF PEPTIDYL-THREONINE PHOSPHORYLATION GOBP GO:0010799	29	0.546246	1.08135	0.347826	0.897476
PID_UPA_UPAR_PATHWAY MSIGDB_C2 PID_UPA_UPAR_PATHWAY	26	0.553265	1.08101	0.330532	0.897484
REGULATION OF PROTEIN AUTOPHOSPHORYLATION GOBP GO:0031952	32	0.531095	1.08062	0.33913	0.897716
POSITIVE REGULATION OF RECEPTOR INTERNALIZATION GOBP GO:0002092	15	0.616123	1.07993	0.352332	0.898893
PI3K-AKT SIGNALING PATHWAY WIKIPATHWAYS_20191210 WP4172 HOMO SAPIENS	241	0.393949	1.07952	0.175676	0.89919
REGULATION OF STRIATED MUSCLE CELL DIFFERENTIATION GOBP GO:0051153	42	0.505671	1.07872	0.321637	0.90101
POSITIVE REGULATION OF PHAGOCYTOSIS GOBP GO:0050766	28	0.549869	1.07857	0.346939	0.900348
PID_RXR_VDR_PATHWAY MSIGDB_C2 PID_RXR_VDR_PATHWAY	24	0.568247	1.07829	0.362857	0.900106
SMOOTHENED SIGNALING PATHWAY GOBP GO:0007224	26	0.549185	1.07759	0.351852	0.901476
COMPLEMENT AND COAGULATION CASCADES WIKIPATHWAYS_20191210 WP558 HOMO SAPIENS	31	0.53508	1.07727	0.359195	0.901463
NEGATIVE REGULATION OF TRANSFERASE ACTIVITY GOBP GO:0051348	181	0.414945	1.07706	0.233918	0.900976
POSITIVE REGULATION OF CYCLIN-DEPENDENT PROTEIN KINASE ACTIVITY GOBP GO:1904031	20	0.581012	1.07639	0.358442	0.90215
ST_T_CELL_SIGNAL_TRANSDUCTION MSIGDB_C2 ST_T_CELL_SIGNAL_TRANSDUCTION	30	0.53146	1.075	0.352151	0.906034
REGULATION OF UBIQUITIN PROTEIN LIGASE ACTIVITY GOBP GO:1904666	19	0.596093	1.07483	0.359173	0.905473
ION TRANSPORT BY P-TYPE ATPASES REACTOME DATABASE ID RELEASE 71 936837	32	0.532871	1.07461	0.347578	0.905063
IL9 NETPATH IL9	19	0.595493	1.07437	0.373057	0.904675
VITAMIN D IN INFLAMMATORY DISEASES WIKIPATHWAYS_20191210 WP4482 HOMO SAPIENS	21	0.580106	1.07415	0.376316	0.904301
NEGATIVE REGULATION OF LYMPHOCYTE PROLIFERATION GOBP GO:0050672	23	0.564623	1.07386	0.362606	0.904167
MESONEPHROS DEVELOPMENT GOBP GO:0001823	23	0.552003	1.07362	0.359249	0.903888
ANION TRANSPORT GOBP GO:0006820	252	0.397305	1.0723	0.214765	0.907483
MEMBRANE ASSEMBLY GOBP GO:0071709	23	0.562641	1.07116	0.371658	0.91036
DOSAGE COMPENSATION GOBP GO:0007549	15	0.607774	1.07103	0.378446	0.909679
REGULATION OF PROTEIN KINASE B SIGNALING GOBP GO:0051896	127	0.429033	1.07022	0.287671	0.911347
INTERLEUKIN-11 SIGNALING PATHWAY WIKIPATHWAYS_20191210 WP2332 HOMO SAPIENS	42	0.504027	1.06988	0.342767	0.911317
EAR DEVELOPMENT GOBP GO:0043583	33	0.521952	1.06967	0.34375	0.910922
EPITHELIUM MIGRATION GOBP GO:0090132	50	0.485814	1.06954	0.328446	0.910219
NEGATIVE REGULATION OF EXTRINSIC APOPTOTIC SIGNALING PATHWAY GOBP GO:2001237	57	0.483034	1.06942	0.313993	0.909444
NEGATIVE REGULATION OF MONONUCLEAR CELL PROLIFERATION GOBP GO:0032945	23	0.564623	1.06928	0.378223	0.908796
SA_B_CELL_RECEPTOR_COMPLEXES MSIGDB_C2 SA_B_CELL_RECEPTOR_COMPLEXES	20	0.58764	1.06887	0.374663	0.909122
UROKINASE-TYPE PLASMINOGEN ACTIVATOR (UPA) AND UPAR-MEDIATED SIGNALING PATHWAY INTERACTION DATABASE NCI-NATURE CURATED DATA UROKINASE-TYPE PLASMINOGEN ACTIVATOR (UPA) AND UPAR-MEDIATED SIGNALING	26	0.553265	1.06856	0.383812	0.909057
POSITIVE REGULATION OF SIGNALING RECEPTOR ACTIVITY GOBP GO:2000273	15	0.594198	1.06853	0.373333	0.907999
DE NOVO PURINE BIOSYNTHESIS PANTHER PATHWAY P02738	22	0.571723	1.06833	0.356568	0.907571
REGULATION OF FAT CELL DIFFERENTIATION GOBP GO:0045598	68	0.454607	1.06824	0.33218	0.906734
CHROMATIN REMODELING GOBP GO:0006338	136	0.419075	1.06766	0.268293	0.907736
PID_FOXM1_PATHWAY MSIGDB_C2 PID_FOXM1_PATHWAY	36	0.524002	1.06763	0.363354	0.906678
REGULATION OF CARDIAC MUSCLE TISSUE GROWTH GOBP GO:0055021	17	0.590406	1.06713	0.410526	0.907272
ACYLGLYCEROL METABOLIC PROCESS GOBP GO:0006639	41	0.507469	1.0671	0.333333	0.906218
WNT/BETA-CATENIN SIGNALING PATHWAY IN LEUKEMIA WIKIPATHWAYS_20191210 WP3658 HOMO SAPIENS	22	0.562329	1.06698	0.380208	0.905474
REGULATION OF CELL MIGRATION INVOLVED IN SPROUTING ANGIOGENESIS GOBP GO:0090049	30	0.538954	1.06688	0.382271	0.904686
PID_ERBB1_DOWNSTREAM_PATHWAY MSIGDB_C2 PID_ERBB1_DOWNSTREAM_PATHWAY	99	0.440166	1.06644	0.320833	0.905124
NON-GENOMIC ACTIONS OF 1,25 DIHYDROXYVITAMIN D3 WIKIPATHWAYS_20191210 WP4341 HOMO SAPIENS	50	0.490781	1.06594	0.361486	0.905702
NEGATIVE REGULATION OF LEUKOCYTE PROLIFERATION GOBP GO:0070664	25	0.557594	1.06589	0.353933	0.904741
NEGATIVE REGULATION OF CELL DEVELOPMENT GOBP GO:0010721	116	0.423596	1.06574	0.240175	0.904114
CELLULAR RESPONSE TO ACID CHEMICAL GOBP GO:0071229	78	0.459212	1.06557	0.32342	0.903623
PID_RHOA_REG_PATHWAY MSIGDB_C2 PID_RHOA_REG_PATHWAY	36	0.511578	1.06546	0.342697	0.902844
REGULATION OF RHOA ACTIVITY PATHWAY INTERACTION DATABASE NCI-NATURE CURATED DATA REGULATION OF RHOA ACTIVITY	36	0.511578	1.06515	0.342342	0.902784
REGULATION OF RESPONSE TO WOUNDING GOBP GO:1903034	88	0.443322	1.06426	0.314394	0.904818
REGULATION OF MYELOID LEUKOCYTE DIFFERENTIATION GOBP GO:0002761	44	0.498337	1.06419	0.351351	0.90398
DEREGULATION OF RAB AND RAB EFFECTOR GENES IN BLADDER CANCER WIKIPATHWAYS_20191210 WP2291 HOMO SAPIENS	15	0.604626	1.06399	0.396509	0.903481
RELEASE OF CYTOCHROME C FROM MITOCHONDRIA GOBP GO:0001836	17	0.586292	1.06386	0.396739	0.902831
RESPONSE TO METAL ION GOBP GO:0010038	116	0.424013	1.06372	0.271967	0.902181
REGULATION OF RESPONSE TO DRUG GOBP GO:2001023	33	0.515909	1.06366	0.352601	0.901244
BIOCARTA_HCMV_PATHWAY MSIGDB_C2 BIOCARTA_HCMV_PATHWAY	16	0.59932	1.06339	0.399061	0.90115
O-LINKED GLYCOSYLATION REACTOME R-HSA-5173105.4	74	0.451938	1.06326	0.318008	0.900546
TELENCEPHALON DEVELOPMENT GOBP GO:0021537	66	0.466699	1.06268	0.30742	0.901525
SIGNALING EVENTS MEDIATED BY HEPATOCYTE GROWTH FACTOR RECEPTOR (C-MET) PATHWAY INTERACTION DATABASE NCI-NATURE CURATED DATA SIGNALING EVENTS MEDIATED BY HEPATOCYTE GROWTH FACTOR RECEPTOR (C-MET)	74	0.453679	1.06154	0.34749	0.904438
NEGATIVE REGULATION OF RESPONSE TO CYTOKINE STIMULUS GOBP GO:0060761	36	0.519291	1.06113	0.377581	0.904765
NEGATIVE REGULATION OF EPITHELIAL CELL MIGRATION GOBP GO:0010633	52	0.478937	1.06034	0.3375	0.906488
CELL CHEMOTAXIS GOBP GO:0060326	68	0.470256	1.05981	0.335548	0.907213
EPITHELIAL CELL MIGRATION GOBP GO:0010631	50	0.485814	1.05969	0.32872	0.906504
REGULATION OF LYMPHOCYTE DIFFERENTIATION GOBP GO:0045619	66	0.455851	1.05901	0.312727	0.90782
AXON DEVELOPMENT GOBP GO:0061564	199	0.405101	1.05889	0.269939	0.907146
BASE EXCISION REPAIR REACTOME DATABASE ID RELEASE 71 73884	49	0.490947	1.05861	0.333333	0.907021
CHEMOTAXIS GOBP GO:0006935	234	0.389072	1.05854	0.264901	0.906169
MALE SEX DIFFERENTIATION GOBP GO:0046661	27	0.541806	1.05841	0.375385	0.905535
HALLMARK_INTERFERON_GAMMA_RESPONSE MSIGDB_C2 HALLMARK_INTERFERON_GAMMA_RESPONSE	141	0.413338	1.05802	0.287037	0.905868
NEGATIVE REGULATION OF SIGNALING RECEPTOR ACTIVITY GOBP GO:2000272	15	0.604274	1.05784	0.409207	0.905405
NEGATIVE REGULATION OF SECRETION GOBP GO:0051048	83	0.450398	1.05707	0.305455	0.906971
REGULATION OF B CELL MEDIATED IMMUNITY GOBP GO:0002712	15	0.585405	1.05648	0.413882	0.908002
ENDOTHELIAL CELL MIGRATION GOBP GO:0043542	40	0.49949	1.05633	0.356923	0.907412
IFN-GAMMA IOB IFN-GAMMA	34	0.514614	1.05629	0.359133	0.906447
NUCLEAR RECEPTORS META-PATHWAY WIKIPATHWAYS_20191210 WP2882 HOMO SAPIENS	198	0.400095	1.05566	0.265537	0.907672
PID_MET_PATHWAY MSIGDB_C2 PID_MET_PATHWAY	75	0.453108	1.05542	0.323944	0.907415
REGULATION OF EPITHELIAL CELL PROLIFERATION GOBP GO:0050678	169	0.406098	1.05505	0.291667	0.9077
TRANSCRIPTION CO-FACTORS SKI AND SKIL PROTEIN PARTNERS WIKIPATHWAYS_20191210 WP4533 HOMO SAPIENS	18	0.591944	1.0542	0.411616	0.909545
REGULATION OF CELLULAR COMPONENT SIZE GOBP GO:0032535	208	0.397644	1.05351	0.262857	0.910823
CLATHRIN-DEPENDENT ENDOCYTOSIS GOBP GO:0072583	18	0.572492	1.05293	0.392308	0.911751
NEGATIVE REGULATION OF ENDOTHELIAL CELL PROLIFERATION GOBP GO:0001937	24	0.544303	1.0529	0.401535	0.910759
MEIOSIS I CELL CYCLE PROCESS GOBP GO:0061982	53	0.465124	1.05286	0.333333	0.909804
INTERACTIONS OF REV WITH HOST CELLULAR PROTEINS REACTOME R-HSA-177243.2	31	0.535448	1.05189	0.376119	0.912138
IL-4 SIGNALING PATHWAY WIKIPATHWAYS_20191210 WP395 HOMO SAPIENS	48	0.498113	1.05184	0.359195	0.911196
PID_ANGIOPOIETIN_RECEPTOR_PATHWAY MSIGDB_C2 PID_ANGIOPOIETIN_RECEPTOR_PATHWAY	40	0.50451	1.05177	0.404605	0.910379
PID_INTEGRIN2_PATHWAY MSIGDB_C2 PID_INTEGRIN2_PATHWAY	15	0.600703	1.05016	0.404145	0.914852
REGULATION OF ANATOMICAL STRUCTURE SIZE GOBP GO:0090066	247	0.388468	1.04982	0.262069	0.914987
REGULATION OF LEUKOCYTE CELL-CELL ADHESION GOBP GO:1903037	129	0.41123	1.04977	0.299465	0.914047
DEVELOPMENTAL MATURATION GOBP GO:0021700	71	0.461011	1.04936	0.355311	0.914415
RESPONSE TO GAMMA RADIATION GOBP GO:0010332	23	0.551286	1.0492	0.389205	0.913832
DNA DAMAGE RESPONSE, SIGNAL TRANSDUCTION BY P53 CLASS MEDIATOR RESULTING IN CELL CYCLE ARREST GOBP GO:0006977	54	0.484186	1.04906	0.339161	0.913199
MEIOSIS I GOBP GO:0007127	51	0.480029	1.04884	0.336667	0.912872
HALLMARK_COMPLEMENT MSIGDB_C2 HALLMARK_COMPLEMENT	141	0.415864	1.04853	0.288372	0.912937
WNT SIGNALING WIKIPATHWAYS_20191210 WP428 HOMO SAPIENS	88	0.450805	1.04811	0.337037	0.913446
POSITIVE REGULATION OF APOPTOTIC SIGNALING PATHWAY GOBP GO:2001235	103	0.42842	1.0481	0.347032	0.912381
INSULIN SIGNALING WIKIPATHWAYS_20191210 WP481 HOMO SAPIENS	145	0.408262	1.04789	0.280193	0.912016
NEPHRON EPITHELIUM DEVELOPMENT GOBP GO:0072009	32	0.519353	1.04773	0.348083	0.911501
REGULATION OF BONE MINERALIZATION GOBP GO:0030500	47	0.488794	1.04752	0.37193	0.911142
OXIDATIVE STRESS WIKIPATHWAYS_20191210 WP408 HOMO SAPIENS	24	0.540765	1.0475	0.4	0.910148
HEPATICOBILIARY SYSTEM DEVELOPMENT GOBP GO:0061008	25	0.537856	1.04703	0.391781	0.910726
TGF-B SIGNALING IN THYROID CELLS FOR EPITHELIAL-MESENCHYMAL TRANSITION WIKIPATHWAYS_20191210 WP3859 HOMO SAPIENS	16	0.594638	1.04667	0.436869	0.910916
TSH NETPATH TSH	72	0.450936	1.04656	0.344948	0.910223
POSITIVE REGULATION OF CARDIAC MUSCLE TISSUE DEVELOPMENT GOBP GO:0055025	18	0.570665	1.04629	0.439093	0.910106
POSITIVE REGULATION OF CELL CYCLE PHASE TRANSITION GOBP GO:1901989	72	0.451058	1.04604	0.33452	0.909885
POSITIVE REGULATION OF CYCLIN-DEPENDENT PROTEIN SERINE/THREONINE KINASE ACTIVITY GOBP GO:0045737	18	0.5813	1.04601	0.412987	0.908917
POSITIVE REGULATION OF RECEPTOR-MEDIATED ENDOCYTOSIS GOBP GO:0048260	34	0.515412	1.04577	0.375	0.908663
ARF6 SIGNALING EVENTS PATHWAY INTERACTION DATABASE NCI-NATURE CURATED DATA ARF6 SIGNALING EVENTS	28	0.528641	1.04466	0.374005	0.911479
REGULATION OF INTERLEUKIN-1 PRODUCTION GOBP GO:0032652	32	0.516228	1.04461	0.373089	0.910611
REGULATION OF IMMUNOGLOBULIN MEDIATED IMMUNE RESPONSE GOBP GO:0002889	15	0.585405	1.04441	0.411917	0.91023
ST_GA12_PATHWAY MSIGDB_C2 ST_GA12_PATHWAY	18	0.581381	1.04441	0.438462	0.909171
BIOCARTA_ETS_PATHWAY MSIGDB_C2 BIOCARTA_ETS_PATHWAY	16	0.591909	1.04438	0.41791	0.908226
REGULATION OF INTERLEUKIN-1 SECRETION GOBP GO:0050704	21	0.558664	1.04435	0.405941	0.907249
PORPHYRIN METABOLISM REACTOME R-HSA-189445.1	16	0.57611	1.04393	0.42029	0.907676
GLYCOPROTEIN BIOSYNTHETIC PROCESS GOBP GO:0009101	197	0.390927	1.04388	0.287293	0.906781
MEIOTIC CHROMOSOME SEPARATION GOBP GO:0051307	15	0.591207	1.04316	0.42402	0.908334
REGULATION OF RESPONSE TO EXTERNAL STIMULUS GOBP GO:0032101	392	0.369821	1.04283	0.25	0.908427
CONNECTIVE TISSUE DEVELOPMENT GOBP GO:0061448	66	0.451449	1.04277	0.349265	0.907634
EMBRYONIC MORPHOGENESIS GOBP GO:0048598	185	0.408155	1.0423	0.333333	0.908256
PID_ARF6_PATHWAY MSIGDB_C2 PID_ARF6_PATHWAY	28	0.528641	1.04219	0.384615	0.907564
GASTRIN_CCK2R_240212 PANTHER PATHWAY P06959	127	0.410366	1.04219	0.366972	0.906538
HALLMARK_APICAL_JUNCTION MSIGDB_C2 HALLMARK_APICAL_JUNCTION	152	0.405245	1.04209	0.374359	0.905795
NUCLEOSOME ORGANIZATION GOBP GO:0034728	91	0.433752	1.04173	0.360996	0.906058
CLASS I PI3K SIGNALING EVENTS PATHWAY INTERACTION DATABASE NCI-NATURE CURATED DATA CLASS I PI3K SIGNALING EVENTS	29	0.534583	1.04172	0.372973	0.905059
NOVEL INTRACELLULAR COMPONENTS OF RIG-I-LIKE RECEPTOR (RLR) PATHWAY WIKIPATHWAYS_20191210 WP3865 HOMO SAPIENS	50	0.476754	1.04151	0.393939	0.904693
NEGATIVE REGULATION OF LEUKOCYTE ACTIVATION GOBP GO:0002695	67	0.45454	1.0415	0.348592	0.903714
INOSITOL TRISPHOSPHATE METABOLIC PROCESS GOBP GO:0032957	15	0.595993	1.04148	0.421836	0.902725
EXOCYTOSIS GOBP GO:0006887	496	0.360343	1.04133	0.218182	0.902214
REGULATION OF STEROID METABOLIC PROCESS GOBP GO:0019218	74	0.450077	1.04077	0.352713	0.903151
DENDRITIC SPINE ORGANIZATION GOBP GO:0097061	20	0.561262	1.04046	0.414248	0.903169
ARTERY MORPHOGENESIS GOBP GO:0048844	28	0.52765	1.04034	0.431694	0.902544
FLAGELLATED SPERM MOTILITY GOBP GO:0030317	23	0.541722	1.04034	0.375358	0.901522
EGF RECEPTOR (ERBB1) SIGNALING PATHWAY PATHWAY INTERACTION DATABASE NCI-NATURE CURATED DATA EGF RECEPTOR (ERBB1) SIGNALING PATHWAY	31	0.521016	1.04027	0.413223	0.900765
BIOCARTA_HIVNEF_PATHWAY MSIGDB_C2 BIOCARTA_HIVNEF_PATHWAY	52	0.463439	1.03923	0.34507	0.903326
BETA2 INTEGRIN CELL SURFACE INTERACTIONS PATHWAY INTERACTION DATABASE NCI-NATURE CURATED DATA BETA2 INTEGRIN CELL SURFACE INTERACTIONS	15	0.600703	1.03922	0.430556	0.902333
NRF2-ARE REGULATION WIKIPATHWAYS_20191210 WP4357 HOMO SAPIENS	22	0.537801	1.03909	0.446475	0.90177
SIGNAL TRANSDUCTION INVOLVED IN DNA DAMAGE CHECKPOINT GOBP GO:0072422	68	0.448988	1.03904	0.375451	0.900887
TUBE DEVELOPMENT GOBP GO:0035295	285	0.381594	1.03879	0.300752	0.900728
CELLULAR DEFENSE RESPONSE GOBP GO:0006968	16	0.587692	1.03855	0.449735	0.900522
REGULATION OF MEMBRANE PERMEABILITY GOBP GO:0090559	62	0.455962	1.03778	0.368771	0.902246
TAXIS GOBP GO:0042330	234	0.389072	1.03724	0.320261	0.90306
REGULATION OF CHOLESTEROL EFFLUX GOBP GO:0010874	16	0.588966	1.03674	0.431635	0.903817
GPCR DOWNSTREAM SIGNALLING REACTOME DATABASE ID RELEASE 71 388396	326	0.371809	1.03631	0.261682	0.90433
CELLULAR RESPONSE TO GAMMA RADIATION GOBP GO:0071480	16	0.58281	1.03622	0.432361	0.903609
POSITIVE REGULATION OF MITOTIC CELL CYCLE PHASE TRANSITION GOBP GO:1901992	60	0.460046	1.03551	0.347826	0.904997
ARTERY DEVELOPMENT GOBP GO:0060840	33	0.502045	1.03465	0.395095	0.906986
POSITIVE REGULATION OF ADAPTIVE IMMUNE RESPONSE GOBP GO:0002821	42	0.492667	1.03457	0.392097	0.906227
REGULATION OF MICROTUBULE DEPOLYMERIZATION GOBP GO:0031114	22	0.554084	1.03446	0.403226	0.905595
CARTILAGE DEVELOPMENT GOBP GO:0051216	52	0.469931	1.0343	0.381579	0.905175
LOCALIZATION OF CELL GOBP GO:0051674	482	0.358946	1.03398	0.256757	0.905161
REGULATION OF PROTEIN TARGETING GOBP GO:1903533	58	0.458275	1.03321	0.403974	0.9068
EMBRYONIC SKELETAL SYSTEM MORPHOGENESIS GOBP GO:0048704	25	0.531204	1.03288	0.40678	0.906825
BIOCARTA_TCR_PATHWAY MSIGDB_C2 BIOCARTA_TCR_PATHWAY	33	0.509665	1.03251	0.420732	0.907032
ANGIOGENESIS PANTHER PATHWAY P00005	125	0.418836	1.03146	0.345133	0.909524
AMINE METABOLIC PROCESS GOBP GO:0009308	32	0.51046	1.03141	0.416431	0.908712
CELL MORPHOGENESIS INVOLVED IN NEURON DIFFERENTIATION GOBP GO:0048667	215	0.388267	1.03064	0.371951	0.910297
AXONOGENESIS GOBP GO:0007409	186	0.394957	1.03021	0.369565	0.910767
NEGATIVE REGULATION OF PEPTIDYL-SERINE PHOSPHORYLATION GOBP GO:0033137	17	0.570914	1.03018	0.441805	0.909864
SPERM MOTILITY GOBP GO:0097722	23	0.541722	1.02986	0.417112	0.909973
NEGATIVE REGULATION OF NEURON PROJECTION DEVELOPMENT GOBP GO:0010977	66	0.457379	1.02985	0.408305	0.909014
INTEGRIN SIGNALLING PATHWAY PANTHER PATHWAY P00034	143	0.40288	1.02982	0.350515	0.908121
DNA-DEPENDENT DNA REPLICATION MAINTENANCE OF FIDELITY GOBP GO:0045005	40	0.49883	1.02953	0.408696	0.908137
MESENCHYMAL CELL DIFFERENTIATION GOBP GO:0048762	82	0.441091	1.02932	0.385159	0.907835
REGULATION OF CELLULAR AMINO ACID METABOLIC PROCESS GOBP GO:0006521	51	0.469816	1.02843	0.416918	0.909868
REGULATION OF TRANSCRIPTION ELONGATION FROM RNA POLYMERASE II PROMOTER GOBP GO:0034243	28	0.541224	1.02842	0.425352	0.908896
NEGATIVE REGULATION OF CELL ACTIVATION GOBP GO:0050866	79	0.439112	1.02771	0.369919	0.910422
NUCLEAR RECEPTOR TRANSCRIPTION PATHWAY REACTOME DATABASE ID RELEASE 71 383280	33	0.512104	1.02726	0.422619	0.910959
IMMUNOGLOBULIN PRODUCTION GOBP GO:0002377	20	0.557852	1.02692	0.429799	0.911164
POSITIVE REGULATION OF POSTTRANSCRIPTIONAL GENE SILENCING GOBP GO:0060148	20	0.551467	1.02692	0.423684	0.910173
NEGATIVE REGULATION OF VIRAL TRANSCRIPTION GOBP GO:0032897	16	0.574959	1.0267	0.434896	0.909901
POSITIVE REGULATION OF TYPE I INTERFERON PRODUCTION GOBP GO:0032481	61	0.45433	1.02642	0.405229	0.909865
FOXA2 AND FOXA3 TRANSCRIPTION FACTOR NETWORKS PATHWAY INTERACTION DATABASE NCI-NATURE CURATED DATA FOXA2 AND FOXA3 TRANSCRIPTION FACTOR NETWORKS	20	0.557636	1.02635	0.411932	0.909125
MULTIVESICULAR BODY SORTING PATHWAY GOBP GO:0071985	29	0.511278	1.02631	0.428571	0.908279
SIGNALING BY BMP REACTOME DATABASE ID RELEASE 71 201451	24	0.534044	1.0263	0.430518	0.907309
PYRIMIDINE-CONTAINING COMPOUND BIOSYNTHETIC PROCESS GOBP GO:0072528	23	0.549727	1.02619	0.43662	0.906716
HCMV EARLY EVENTS REACTOME DATABASE ID RELEASE 71 9609690	54	0.46637	1.02566	0.383513	0.907533
AMEBOIDAL-TYPE CELL MIGRATION GOBP GO:0001667	82	0.438403	1.02561	0.374016	0.906722
REGULATION OF ENDOTHELIAL CELL DIFFERENTIATION GOBP GO:0045601	19	0.555537	1.02557	0.458115	0.905843
CATION TRANSMEMBRANE TRANSPORT GOBP GO:0098655	221	0.386796	1.02529	0.333333	0.905803
REGULATION OF P38-ALPHA AND P38-BETA PATHWAY INTERACTION DATABASE NCI-NATURE CURATED DATA REGULATION OF P38-ALPHA AND P38-BETA	26	0.517733	1.02519	0.41716	0.905145
AXON GUIDANCE GOBP GO:0007411	134	0.406386	1.02496	0.336134	0.904919
ENDOCRINE PROCESS GOBP GO:0050886	17	0.570941	1.02471	0.410667	0.904798
REGULATION OF ADHERENS JUNCTION ORGANIZATION GOBP GO:1903391	54	0.460063	1.02467	0.401993	0.903963
REGULATION OF MITOTIC NUCLEAR DIVISION GOBP GO:0007088	130	0.404929	1.02426	0.394872	0.904412
KSRP (KHSRP) BINDS AND DESTABILIZES MRNA REACTOME R-HSA-450604.2	16	0.575866	1.02422	0.43932	0.903574
REGULATION OF MITOCHONDRIAL MEMBRANE PERMEABILITY GOBP GO:0046902	56	0.472422	1.02401	0.392361	0.903259
PROTEIN LOCALIZATION TO CHROMOSOME, CENTROMERIC REGION GOBP GO:0071459	17	0.573303	1.02326	0.442708	0.904851
SIGNAL TRANSDUCTION INVOLVED IN DNA INTEGRITY CHECKPOINT GOBP GO:0072401	68	0.448988	1.02311	0.377224	0.904386
GLYCOSPHINGOLIPID METABOLISM REACTOME R-HSA-1660662.5	36	0.496787	1.02304	0.420588	0.903648
REGULATION OF FOCAL ADHESION ASSEMBLY GOBP GO:0051893	47	0.472667	1.02278	0.398026	0.903547
NUCLEAR-TRANSCRIBED MRNA CATABOLIC PROCESS, EXONUCLEOLYTIC GOBP GO:0000291	34	0.489498	1.02232	0.42577	0.904153
PID_RET_PATHWAY MSIGDB_C2 PID_RET_PATHWAY	35	0.48969	1.02219	0.400593	0.90363
PROTEIN DEMANNOSYLATION GOBP GO:0036507	18	0.552409	1.02176	0.428218	0.904152
NEUROTROPHIC FACTOR-MEDIATED TRK RECEPTOR SIGNALING PATHWAY INTERACTION DATABASE NCI-NATURE CURATED DATA NEUROTROPHIC FACTOR-MEDIATED TRK RECEPTOR SIGNALING	50	0.465048	1.02093	0.419672	0.905943
NCRNA EXPORT FROM NUCLEUS GOBP GO:0097064	34	0.499811	1.02088	0.422442	0.905102
GLYCOSYLATION GOBP GO:0070085	158	0.402509	1.02077	0.35545	0.904496
REGULATION OF NEUROTRANSMITTER SECRETION GOBP GO:0046928	34	0.505167	1.02048	0.444759	0.904588
PEPTIDYL-TYROSINE PHOSPHORYLATION GOBP GO:0018108	51	0.470826	1.02043	0.415902	0.903787
POSITIVE REGULATION OF LYMPHOCYTE DIFFERENTIATION GOBP GO:0045621	35	0.49674	1.02016	0.422741	0.903757
REGULATION OF RHO PROTEIN SIGNAL TRANSDUCTION GOBP GO:0035023	51	0.465074	1.01985	0.429907	0.90387
SIGNALING BY GPCR REACTOME R-HSA-372790.4	356	0.365925	1.01966	0.292135	0.90355
NUCLEAR RECEPTORS IN LIPID METABOLISM AND TOXICITY WIKIPATHWAYS_20191210 WP299 HOMO SAPIENS	15	0.582145	1.01966	0.469231	0.902603
MALE GONAD DEVELOPMENT GOBP GO:0008584	24	0.522574	1.0189	0.435262	0.904032
MAPK SIGNALING PATHWAY WIKIPATHWAYS_20191210 WP382 HOMO SAPIENS	186	0.385696	1.0183	0.341176	0.905079
REGULATION OF CELLULAR AMINE METABOLIC PROCESS GOBP GO:0033238	55	0.456755	1.01799	0.407767	0.905082
EMBRYONIC EPITHELIAL TUBE FORMATION GOBP GO:0001838	36	0.513608	1.01757	0.438889	0.905596
REGULATION OF PROTEIN POLYMERIZATION GOBP GO:0032271	135	0.406291	1.01618	0.386473	0.909316
CELL MOTILITY GOBP GO:0048870	482	0.358946	1.01609	0.356164	0.908688
PRION DISEASE PATHWAY WIKIPATHWAYS_20191210 WP3995 HOMO SAPIENS	27	0.507621	1.01579	0.414986	0.908724
PID_ERBB1_INTERNALIZATION_PATHWAY MSIGDB_C2 PID_ERBB1_INTERNALIZATION_PATHWAY	38	0.495207	1.01579	0.428986	0.90778
MET PROMOTES CELL MOTILITY REACTOME R-HSA-8875878.1	25	0.512166	1.01574	0.400576	0.906994
DNA DAMAGE RESPONSE (ONLY ATM DEPENDENT) WIKIPATHWAYS_20191210 WP710 HOMO SAPIENS	95	0.419819	1.01464	0.384937	0.909609
PID_HNF3B_PATHWAY MSIGDB_C2 PID_HNF3B_PATHWAY	20	0.557636	1.01329	0.429775	0.913145
ORGANIC ANION TRANSPORT GOBP GO:0015711	212	0.375009	1.01301	0.371257	0.913081
NEGATIVE REGULATION OF CELL ADHESION GOBP GO:0007162	146	0.400185	1.01266	0.40625	0.913291
REGULATION OF LYMPHOCYTE ACTIVATION GOBP GO:0051249	178	0.389438	1.01244	0.389744	0.913068
ENDOGENOUS STEROLS REACTOME R-HSA-211976.4	19	0.55383	1.0119	0.438889	0.91403
CENP-A CONTAINING CHROMATIN ORGANIZATION GOBP GO:0061641	31	0.503784	1.01185	0.428941	0.913259
AURORA A SIGNALING PATHWAY INTERACTION DATABASE NCI-NATURE CURATED DATA AURORA A SIGNALING	31	0.49385	1.0113	0.421652	0.914183
RHO GTPASE CYCLE REACTOME DATABASE ID RELEASE 71 194840	115	0.40851	1.01083	0.384937	0.91487
PDGF PATHWAY WIKIPATHWAYS_20191210 WP2526 HOMO SAPIENS	38	0.488824	1.01072	0.456897	0.914308
REGULATION OF ACTIN FILAMENT ORGANIZATION GOBP GO:0110053	169	0.386426	1.01064	0.320856	0.913626
NUCLEOSOME ASSEMBLY REACTOME R-HSA-774815.1	34	0.496657	1.01063	0.440476	0.912708
BIOCARTA_NFKB_PATHWAY MSIGDB_C2 BIOCARTA_NFKB_PATHWAY	20	0.54105	1.01057	0.430678	0.911985
RET SIGNALING REACTOME DATABASE ID RELEASE 71 8853659	27	0.516779	1.01053	0.443548	0.911176
POSITIVE REGULATION OF CELL DIFFERENTIATION GOBP GO:0045597	473	0.357261	1.01023	0.430556	0.911245
PLASMA MEMBRANE BOUNDED CELL PROJECTION MORPHOGENESIS GOBP GO:0120039	250	0.372573	1.01009	0.363636	0.910738
SYNTHESIS OF PC REACTOME R-HSA-1483191.4	24	0.527838	1.00992	0.444751	0.910361
DEPOSITION OF NEW CENPA-CONTAINING NUCLEOSOMES AT THE CENTROMERE REACTOME R-HSA-606279.1	34	0.496657	1.00977	0.421053	0.909965
CELL PART MORPHOGENESIS GOBP GO:0032990	264	0.367423	1.00977	0.401515	0.909035
REGULATION OF CELLULAR RESPONSE TO INSULIN STIMULUS GOBP GO:1900076	31	0.507872	1.00972	0.446064	0.908257
DEVELOPMENT OF PRIMARY MALE SEXUAL CHARACTERISTICS GOBP GO:0046546	25	0.521293	1.00965	0.42973	0.907568
POSITIVE REGULATION OF PROTEIN LOCALIZATION TO NUCLEUS GOBP GO:1900182	50	0.472029	1.00959	0.429467	0.906838
REGULATION OF RAS FAMILY ACTIVATION PATHWAY INTERACTION DATABASE NCI-NATURE CURATED DATA REGULATION OF RAS FAMILY ACTIVATION	25	0.520226	1.00942	0.427397	0.906465
POSITIVE REGULATION OF TRANSLATIONAL INITIATION GOBP GO:0045948	21	0.547025	1.00928	0.450262	0.906022
CARDIAC CONDUCTION REACTOME R-HSA-5576891.2	70	0.436526	1.00927	0.397887	0.905148
NEURON PROJECTION DEVELOPMENT GOBP GO:0031175	326	0.364091	1.00909	0.38835	0.904836
TP53 REGULATES TRANSCRIPTION OF GENES INVOLVED IN CYTOCHROME C RELEASE REACTOME R-HSA-6803204.1	15	0.569785	1.00886	0.485095	0.904702
REGULATION OF REACTIVE OXYGEN SPECIES BIOSYNTHETIC PROCESS GOBP GO:1903426	40	0.475378	1.0088	0.434375	0.903988
REGULATION OF CELL-SUBSTRATE JUNCTION ASSEMBLY GOBP GO:0090109	47	0.472667	1.00871	0.416938	0.903375
PEPTIDYL-LYSINE MODIFICATION GOBP GO:0018205	210	0.381061	1.00868	0.368132	0.902558
POSITIVE REGULATION OF REGULATED SECRETORY PATHWAY GOBP GO:1903307	24	0.528914	1.00842	0.442254	0.90251
PIGMENT METABOLIC PROCESS GOBP GO:0042440	33	0.492913	1.00829	0.447059	0.901999
TRANSCRIPTIONAL REGULATION BY THE AP-2 (TFAP2) FAMILY OF TRANSCRIPTION FACTORS REACTOME DATABASE ID RELEASE 71 8864260	27	0.517701	1.0081	0.444776	0.901746
EMBRYONIC DIGESTIVE TRACT DEVELOPMENT GOBP GO:0048566	17	0.545627	1.00758	0.431472	0.902535
NUCLEOBASE-CONTAINING SMALL MOLECULE INTERCONVERSION GOBP GO:0015949	28	0.506617	1.00757	0.433526	0.901633
REGULATION OF SYSTEM PROCESS GOBP GO:0044057	227	0.377897	1.00747	0.433566	0.901075
LIVER DEVELOPMENT GOBP GO:0001889	24	0.537978	1.00733	0.45961	0.900637
INTERACTION BETWEEN L1 AND ANKYRINS REACTOME R-HSA-445095.1	19	0.542192	1.0073	0.433526	0.899844
NOTCH3 INTRACELLULAR DOMAIN REGULATES TRANSCRIPTION REACTOME R-HSA-9013508.1	18	0.571218	1.00724	0.488834	0.899139
NANOPARTICLE-MEDIATED ACTIVATION OF RECEPTOR SIGNALING WIKIPATHWAYS_20191210 WP2643 HOMO SAPIENS	28	0.511995	1.00718	0.452442	0.898421
NEGATIVE REGULATION OF CELL PROJECTION ORGANIZATION GOBP GO:0031345	85	0.42146	1.00663	0.409962	0.899285
SENSORY ORGAN DEVELOPMENT GOBP GO:0007423	131	0.397952	1.00657	0.447115	0.898578
NEURON PROJECTION MORPHOGENESIS GOBP GO:0048812	248	0.372587	1.00631	0.434783	0.898552
REGULATION OF STRESS-ACTIVATED PROTEIN KINASE SIGNALING CASCADE GOBP GO:0070302	151	0.388445	1.00599	0.39823	0.898703
SYNTHESIS OF IP3 AND IP4 IN THE CYTOSOL REACTOME DATABASE ID RELEASE 71 1855204	23	0.526904	1.00598	0.422043	0.897849
CHROMATIN REMODELING AT CENTROMERE GOBP GO:0031055	33	0.496618	1.00595	0.441088	0.89703
INORGANIC ION TRANSMEMBRANE TRANSPORT GOBP GO:0098660	226	0.376026	1.00562	0.405594	0.897248
REGULATION OF PEPTIDYL-SERINE PHOSPHORYLATION GOBP GO:0033135	76	0.435504	1.00551	0.411765	0.896744
REGULATION OF DEFENSE RESPONSE TO VIRUS BY HOST GOBP GO:0050691	20	0.554232	1.00533	0.443526	0.896451
SIGNALING EVENTS REGULATED BY RET TYROSINE KINASE PATHWAY INTERACTION DATABASE NCI-NATURE CURATED DATA SIGNALING EVENTS REGULATED BY RET TYROSINE KINASE	35	0.48969	1.00526	0.450151	0.895739
CELLULAR RESPONSE TO INORGANIC SUBSTANCE GOBP GO:0071241	77	0.428077	1.00504	0.420875	0.895594
INTEGRINS IN ANGIOGENESIS PATHWAY INTERACTION DATABASE NCI-NATURE CURATED DATA INTEGRINS IN ANGIOGENESIS	51	0.464032	1.00453	0.411565	0.896361
HDACS DEACETYLATE HISTONES REACTOME DATABASE ID RELEASE 71 3214815	34	0.49588	1.00424	0.467606	0.89647
REGULATION OF PROTEIN BINDING GOBP GO:0043393	129	0.397482	1.00417	0.420814	0.895804
CENP-A CONTAINING NUCLEOSOME ASSEMBLY GOBP GO:0034080	31	0.503784	1.004	0.425287	0.895473
DNA REPLICATION PANTHER PATHWAY P00017	16	0.560711	1.00385	0.483117	0.895044
POSITIVE REGULATION OF NITRIC OXIDE BIOSYNTHETIC PROCESS GOBP GO:0045429	17	0.557821	1.0038	0.439528	0.894336
PEPTIDYL-THREONINE DEPHOSPHORYLATION GOBP GO:0035970	16	0.569204	1.00332	0.472081	0.895049
MAPK CASCADE GOBP GO:0000165	241	0.37561	1.0032	0.405405	0.894539
XENOBIOTIC METABOLIC PROCESS GOBP GO:0006805	41	0.480731	1.00305	0.444109	0.894128
REGULATION OF LIPID KINASE ACTIVITY GOBP GO:0043550	36	0.482191	1.00261	0.457831	0.894756
POSITIVE REGULATION OF INTRINSIC APOPTOTIC SIGNALING PATHWAY GOBP GO:2001244	37	0.484911	1.00233	0.432602	0.894732
REV-MEDIATED NUCLEAR EXPORT OF HIV RNA REACTOME DATABASE ID RELEASE 71 165054	29	0.506971	1.00233	0.434911	0.89388
PEPTIDE LIGAND-BINDING RECEPTORS REACTOME DATABASE ID RELEASE 71 375276	45	0.47604	1.00228	0.442073	0.893141
REGULATION OF MEMBRANE REPOLARIZATION GOBP GO:0060306	19	0.538608	1.00216	0.464567	0.892681
DNA DAMAGE RESPONSE, SIGNAL TRANSDUCTION BY P53 CLASS MEDIATOR GOBP GO:0030330	71	0.431661	1.00205	0.416961	0.892202
NABA_BASEMENT_MEMBRANES MSIGDB_C2 NABA_BASEMENT_MEMBRANES	30	0.506408	1.00204	0.428977	0.891346
DOPAMINE NEUROTRANSMITTER RELEASE CYCLE REACTOME R-HSA-212676.2	16	0.567411	1.00163	0.47043	0.891826
CHONDROCYTE DEVELOPMENT GOBP GO:0002063	15	0.590169	1.00117	0.470109	0.892379
REGULATION OF NUCLEAR DIVISION GOBP GO:0051783	133	0.4037	1.00096	0.38565	0.892166
REGULATION OF NITRIC-OXIDE SYNTHASE ACTIVITY GOBP GO:0050999	28	0.511918	1.0008	0.442857	0.891805
NUCLEAR ENVELOPE ORGANIZATION GOBP GO:0006998	44	0.473788	1.00032	0.425982	0.892545
PID_TRKR_PATHWAY MSIGDB_C2 PID_TRKR_PATHWAY	52	0.457318	1.00032	0.428571	0.891688
REGULATION OF KIDNEY DEVELOPMENT GOBP GO:0090183	24	0.520929	1.00019	0.450402	0.891215
BIOCARTA_IL6_PATHWAY MSIGDB_C2 BIOCARTA_IL6_PATHWAY	22	0.540236	0.999986	0.467606	0.890962
SPERMATID DIFFERENTIATION GOBP GO:0048515	43	0.465769	0.999774	0.422839	0.890787
INTERCONVERSION OF NUCLEOTIDE DI- AND TRIPHOSPHATES REACTOME DATABASE ID RELEASE 71 499943	26	0.513675	0.999742	0.442935	0.890039
PID_P38_ALPHA_BETA_PATHWAY MSIGDB_C2 PID_P38_ALPHA_BETA_PATHWAY	27	0.517631	0.999333	0.474114	0.890484
POSITIVE REGULATION OF CELL MIGRATION GOBP GO:0030335	325	0.362874	0.999302	0.365385	0.889716
NEGATIVE REGULATION OF NEUROGENESIS GOBP GO:0050768	102	0.412523	0.99895	0.406844	0.889976
REGULATION OF CHOLESTEROL TRANSPORT GOBP GO:0032374	27	0.504011	0.998807	0.444444	0.889618
NEURAL CREST DIFFERENTIATION WIKIPATHWAYS_20191210 WP2064 HOMO SAPIENS	59	0.445578	0.998664	0.440972	0.889194
FOREBRAIN DEVELOPMENT GOBP GO:0030900	91	0.424033	0.998615	0.444444	0.888518
POSITIVE REGULATION OF MITOCHONDRIAL OUTER MEMBRANE PERMEABILIZATION INVOLVED IN APOPTOTIC SIGNALING PATHWAY GOBP GO:1901030	30	0.509134	0.997815	0.449721	0.890264
REGULATION OF COLLAGEN METABOLIC PROCESS GOBP GO:0010712	16	0.557523	0.997659	0.471698	0.889924
PEPTIDYL-CYSTEINE MODIFICATION GOBP GO:0018198	24	0.515425	0.997492	0.48169	0.889617
MITOTIC G1/S TRANSITION CHECKPOINT GOBP GO:0044819	60	0.443846	0.997395	0.452632	0.889056
P38 MAPK PATHWAY PANTHER PATHWAY P05918	31	0.500448	0.996943	0.441261	0.889611
CORTICAL CYTOSKELETON ORGANIZATION GOBP GO:0030865	38	0.475816	0.996915	0.43662	0.888863
REACTIVE OXYGEN SPECIES METABOLIC PROCESS GOBP GO:0072593	53	0.44612	0.996874	0.450331	0.888151
POSITIVE REGULATION OF ADHERENS JUNCTION ORGANIZATION GOBP GO:1903393	21	0.536259	0.996657	0.449468	0.888007
NGF IOB NGF	20	0.536745	0.996599	0.477273	0.88732
REGULATION OF SMOOTH MUSCLE CONTRACTION GOBP GO:0006940	21	0.531865	0.996328	0.461538	0.887337
EXONUCLEOLYTIC NUCLEAR-TRANSCRIBED MRNA CATABOLIC PROCESS INVOLVED IN DEADENYLATION-DEPENDENT DECAY GOBP GO:0043928	32	0.491766	0.99616	0.432961	0.887016
NEGATIVE REGULATION OF ERBB SIGNALING PATHWAY GOBP GO:1901185	42	0.473284	0.995974	0.469799	0.886763
NEGATIVE REGULATION OF NERVOUS SYSTEM DEVELOPMENT GOBP GO:0051961	111	0.403919	0.995806	0.44206	0.886464
CELL MIGRATION GOBP GO:0016477	427	0.355309	0.994994	0.450704	0.888189
EPHB-MEDIATED FORWARD SIGNALING REACTOME DATABASE ID RELEASE 71 3928662	31	0.485527	0.994945	0.466463	0.887496
NOTCH SIGNALING PATHWAY PANTHER PATHWAY P00045	24	0.521069	0.994819	0.47644	0.887091
RESPONSE TO PEPTIDE HORMONE GOBP GO:0043434	171	0.374154	0.994689	0.44898	0.886643
STIMULI-SENSING CHANNELS REACTOME DATABASE ID RELEASE 71 2672351	58	0.452013	0.994286	0.452703	0.88703
RECEPTOR CLUSTERING GOBP GO:0043113	25	0.520707	0.994237	0.47541	0.886347
ERBB2 SIGNALING PATHWAY GOBP GO:0038128	21	0.529011	0.994225	0.472222	0.885557
HALLMARK_IL6_JAK_STAT3_SIGNALING MSIGDB_C2 HALLMARK_IL6_JAK_STAT3_SIGNALING	57	0.444212	0.993474	0.448845	0.887172
CALCIUM ION TRANSMEMBRANE TRANSPORT GOBP GO:0070588	89	0.412901	0.993379	0.44856	0.886632
REGULATION OF STRESS-ACTIVATED MAPK CASCADE GOBP GO:0032872	149	0.395177	0.992727	0.442623	0.887998
INORGANIC ION IMPORT ACROSS PLASMA MEMBRANE GOBP GO:0099587	35	0.481668	0.992705	0.432507	0.887246
NEGATIVE REGULATION OF KINASE ACTIVITY GOBP GO:0033673	155	0.387994	0.992537	0.44898	0.886938
CLASS A 1 (RHODOPSIN-LIKE RECEPTORS) REACTOME DATABASE ID RELEASE 71 373076	86	0.416794	0.992518	0.464	0.886176
NEUROTRANSMITTER RELEASE CYCLE REACTOME R-HSA-112310.5	28	0.50171	0.992289	0.468493	0.886049
REGULATION OF HISTONE H3-K9 METHYLATION GOBP GO:0051570	15	0.571945	0.992221	0.484615	0.88542
REGULATION OF INSULIN SECRETION GOBP GO:0050796	71	0.42537	0.991659	0.413907	0.886382
REGULATION OF PROTEIN LOCALIZATION TO NUCLEUS GOBP GO:1900180	70	0.42839	0.991613	0.424908	0.885696
CELL PROJECTION MORPHOGENESIS GOBP GO:0048858	253	0.368188	0.991211	0.453237	0.886149
BMP SIGNALING PATHWAY GOBP GO:0030509	53	0.445409	0.991057	0.444785	0.885791
PID_AURORA_A_PATHWAY MSIGDB_C2 PID_AURORA_A_PATHWAY	31	0.49385	0.990687	0.456647	0.886173
DOWNSTREAM SIGNALING OF ACTIVATED FGFR2 REACTOME R-HSA-5654696.1	16	0.557829	0.990683	0.471074	0.885359
REGULATION OF MEMBRANE POTENTIAL GOBP GO:0042391	185	0.372771	0.990426	0.458101	0.885382
BIOCARTA_CREB_PATHWAY MSIGDB_C2 BIOCARTA_CREB_PATHWAY	22	0.523634	0.990286	0.478149	0.885015
REGULATION OF ESTABLISHMENT OF PROTEIN LOCALIZATION TO MITOCHONDRION GOBP GO:1903747	58	0.433265	0.990244	0.440678	0.884337
POSITIVE REGULATION OF LIPID METABOLIC PROCESS GOBP GO:0045834	82	0.418523	0.98998	0.436	0.88429
INORGANIC CATION TRANSMEMBRANE TRANSPORT GOBP GO:0098662	210	0.37674	0.989574	0.464286	0.884701
KIDNEY EPITHELIUM DEVELOPMENT GOBP GO:0072073	36	0.475237	0.988764	0.433803	0.886598
REGULATION OF INSULIN RECEPTOR SIGNALING PATHWAY GOBP GO:0046626	28	0.499171	0.988612	0.454802	0.886233
POSITIVE REGULATION OF GENE SILENCING BY MIRNA GOBP GO:2000637	19	0.551825	0.988527	0.486979	0.885709
REGULATION OF LEUKOCYTE CHEMOTAXIS GOBP GO:0002688	62	0.442521	0.988337	0.462295	0.885493
POSITIVE REGULATION OF LEUKOCYTE DIFFERENTIATION GOBP GO:1902107	57	0.450744	0.988184	0.467577	0.885162
INORGANIC CATION IMPORT ACROSS PLASMA MEMBRANE GOBP GO:0098659	35	0.481668	0.988053	0.464183	0.884771
POSITIVE REGULATION OF NUCLEAR DIVISION GOBP GO:0051785	41	0.457946	0.987627	0.461059	0.885325
G1 DNA DAMAGE CHECKPOINT GOBP GO:0044783	61	0.439915	0.986966	0.453074	0.886684
ACTIVATION OF ANTERIOR HOX GENES IN HINDBRAIN DEVELOPMENT DURING EARLY EMBRYOGENESIS REACTOME DATABASE ID RELEASE 71 5617472	64	0.432181	0.986845	0.456929	0.886251
TRANSCRIPTIONAL REGULATION OF WHITE ADIPOCYTE DIFFERENTIATION REACTOME R-HSA-381340.2	70	0.429186	0.98656	0.447471	0.886294
REGULATION OF P38MAPK CASCADE GOBP GO:1900744	32	0.483123	0.986546	0.447592	0.885527
POSITIVE REGULATION OF NITRIC OXIDE METABOLIC PROCESS GOBP GO:1904407	18	0.548982	0.986024	0.488372	0.88638
TRNA AMINOACYLATION FOR PROTEIN TRANSLATION GOBP GO:0006418	43	0.461149	0.98576	0.458746	0.886368
MEMBRANE DEPOLARIZATION GOBP GO:0051899	28	0.496097	0.985694	0.456284	0.885765
POSITIVE REGULATION OF SMALL GTPASE MEDIATED SIGNAL TRANSDUCTION GOBP GO:0051057	40	0.475255	0.984775	0.460411	0.88784
TRANSMISSION OF NERVE IMPULSE GOBP GO:0019226	17	0.544901	0.984567	0.465823	0.887677
PROTEIN TETRAMERIZATION GOBP GO:0051262	53	0.445612	0.984159	0.45302	0.888172
CENTROMERE COMPLEX ASSEMBLY GOBP GO:0034508	37	0.480372	0.984012	0.457576	0.887832
PRC2 METHYLATES HISTONES AND DNA REACTOME DATABASE ID RELEASE 71 212300	20	0.530268	0.983992	0.459064	0.88709
ST_GRANULE_CELL_SURVIVAL_PATHWAY MSIGDB_C2 ST_GRANULE_CELL_SURVIVAL_PATHWAY	22	0.51914	0.983794	0.533708	0.886873
ADAPTIVE IMMUNE RESPONSE GOBP GO:0002250	42	0.468253	0.983228	0.4613	0.887887
CHROMATIN SILENCING GOBP GO:0006342	44	0.454637	0.982784	0.452769	0.888467
REGULATION OF SYNAPSE STRUCTURE OR ACTIVITY GOBP GO:0050803	83	0.415204	0.982741	0.463602	0.887786
POSITIVE REGULATION OF CHROMOSOME SEGREGATION GOBP GO:0051984	29	0.487127	0.982628	0.479784	0.887356
MITOTIC G1 DNA DAMAGE CHECKPOINT GOBP GO:0031571	60	0.443846	0.981712	0.472669	0.889431
HCMV INFECTION REACTOME R-HSA-9609646.1	74	0.429339	0.980981	0.471831	0.890885
REGULATION OF STEROL TRANSPORT GOBP GO:0032371	27	0.504011	0.980812	0.485465	0.890618
POSITIVE REGULATION OF BIOMINERAL TISSUE DEVELOPMENT GOBP GO:0070169	33	0.473948	0.980706	0.475	0.890138
POSITIVE REGULATION OF PLASMA MEMBRANE BOUNDED CELL PROJECTION ASSEMBLY GOBP GO:0120034	66	0.423583	0.980663	0.492857	0.889468
ACTIVATION OF HOX GENES DURING DIFFERENTIATION REACTOME DATABASE ID RELEASE 71 5619507	64	0.432181	0.980136	0.469965	0.89038
NEGATIVE REGULATION OF PROTEIN KINASE ACTIVITY GOBP GO:0006469	147	0.39019	0.979871	0.495413	0.8904
CYTOSOLIC TRANSPORT GOBP GO:0016482	123	0.400623	0.97983	0.455645	0.889726
GLUCOSE HOMEOSTASIS GOBP GO:0042593	68	0.425886	0.979386	0.496241	0.890409
P75(NTR)-MEDIATED SIGNALING PATHWAY INTERACTION DATABASE NCI-NATURE CURATED DATA P75(NTR)-MEDIATED SIGNALING	57	0.434715	0.978879	0.496667	0.891259
B-WICH COMPLEX POSITIVELY REGULATES RRNA EXPRESSION REACTOME R-HSA-5250924.2	36	0.469855	0.978641	0.475073	0.891194
WNT SIGNALING PATHWAY (NETPATH) WIKIPATHWAYS_20191210 WP363 HOMO SAPIENS	47	0.457279	0.978475	0.476821	0.890995
PROTEIN ALPHA-1,2-DEMANNOSYLATION GOBP GO:0036508	18	0.552409	0.977854	0.479224	0.892155
MESENCHYME DEVELOPMENT GOBP GO:0060485	106	0.39883	0.977751	0.46789	0.891688
CALCIUM ION TRANSPORT GOBP GO:0006816	118	0.397999	0.977413	0.481308	0.891894
REGULATION OF AUTOPHAGY OF MITOCHONDRION GOBP GO:1903146	27	0.495278	0.977137	0.483871	0.89197
RNA PHOSPHODIESTER BOND HYDROLYSIS, ENDONUCLEOLYTIC GOBP GO:0090502	20	0.526239	0.976642	0.491049	0.89271
EML4 AND NUDC IN MITOTIC SPINDLE FORMATION REACTOME R-HSA-9648025.1	95	0.406803	0.976599	0.494071	0.892046
BMP SIGNALING PATHWAY IN EYELID DEVELOPMENT WIKIPATHWAYS_20191210 WP3927 HOMO SAPIENS	18	0.541457	0.976421	0.51105	0.891816
VERY LONG-CHAIN FATTY ACID METABOLIC PROCESS GOBP GO:0000038	18	0.531935	0.97633	0.510811	0.891302
POSITIVE REGULATION OF MEMBRANE PERMEABILITY GOBP GO:1905710	17	0.531539	0.975847	0.491443	0.892135
GM-CSF IOB GM-CSF	71	0.417509	0.975838	0.494949	0.891368
NEGATIVE REGULATION OF PROTEIN PHOSPHORYLATION GOBP GO:0001933	253	0.359702	0.975749	0.528985	0.890841
NEURON DEVELOPMENT GOBP GO:0048666	365	0.346684	0.975509	0.55814	0.890761
NEGATIVE REGULATION OF CELLULAR PROTEIN CATABOLIC PROCESS GOBP GO:1903363	64	0.438299	0.975451	0.504918	0.890149
TRANSCRIPTION FACTOR REGULATION IN ADIPOGENESIS WIKIPATHWAYS_20191210 WP3599 HOMO SAPIENS	16	0.535991	0.975193	0.488665	0.890168
NUCLEAR RECEPTORS WIKIPATHWAYS_20191210 WP170 HOMO SAPIENS	30	0.493978	0.975182	0.481482	0.889416
REGULATION OF SMALL GTPASE MEDIATED SIGNAL TRANSDUCTION GOBP GO:0051056	202	0.374299	0.974784	0.517857	0.889915
AMINO ACID ACTIVATION GOBP GO:0043038	46	0.452522	0.974755	0.48	0.889224
REGULATION OF EXTRACELLULAR MATRIX ORGANIZATION GOBP GO:1903053	26	0.489428	0.9746	0.477528	0.88891
LYMPHOCYTE COSTIMULATION GOBP GO:0031294	26	0.498966	0.974322	0.515493	0.888999
REGULATION OF RECEPTOR INTERNALIZATION GOBP GO:0002090	31	0.486652	0.974169	0.482659	0.888653
CELLULAR RESPONSE TO HORMONE STIMULUS GOBP GO:0032870	284	0.355355	0.973326	0.555556	0.890526
RESPONSE TO TYPE I INTERFERON GOBP GO:0034340	36	0.458172	0.973024	0.482456	0.890721
POSITIVE REGULATION OF MITOCHONDRIAL MEMBRANE PERMEABILITY GOBP GO:0035794	17	0.531539	0.972641	0.501223	0.891061
EYE MORPHOGENESIS GOBP GO:0048592	46	0.451172	0.972581	0.498423	0.890468
LPA RECEPTOR MEDIATED EVENTS PATHWAY INTERACTION DATABASE NCI-NATURE CURATED DATA LPA RECEPTOR MEDIATED EVENTS	54	0.443592	0.972427	0.520376	0.890152
SEX DIFFERENTIATION GOBP GO:0007548	61	0.435227	0.972367	0.456376	0.889553
PROTEIN K48-LINKED UBIQUITINATION GOBP GO:0070936	47	0.449335	0.972248	0.468468	0.889166
G2 M DNA DAMAGE CHECKPOINT REACTOME R-HSA-69473.4	61	0.437181	0.971801	0.496528	0.889802
REGULATION OF EPITHELIAL CELL MIGRATION GOBP GO:0010632	168	0.375821	0.971777	0.505319	0.889096
REGULATION OF ENDOTHELIAL CELL PROLIFERATION GOBP GO:0001936	85	0.411186	0.971487	0.490775	0.889219
DEFECTIVE TPR MAY CONFER SUSCEPTIBILITY TOWARDS THYROID PAPILLARY CARCINOMA (TPC) REACTOME DATABASE ID RELEASE 71 5619107	25	0.499725	0.971454	0.507289	0.88854
REGULATION OF NOTCH SIGNALING PATHWAY GOBP GO:0008593	57	0.434791	0.971141	0.478548	0.888721
REGULATION OF T CELL ACTIVATION GOBP GO:0050863	131	0.389071	0.970735	0.478469	0.889197
MEIOTIC CHROMOSOME SEGREGATION GOBP GO:0045132	32	0.488613	0.969514	0.489231	0.892294
CENTRAL NERVOUS SYSTEM DEVELOPMENT GOBP GO:0007417	329	0.350155	0.969088	0.574257	0.892855
T CELL COSTIMULATION GOBP GO:0031295	25	0.508655	0.968883	0.51105	0.892729
REGULATION OF CARDIOCYTE DIFFERENTIATION GOBP GO:1905207	24	0.516193	0.968873	0.512755	0.891984
ACTIVATION OF JUN KINASE ACTIVITY GOBP GO:0007257	25	0.502947	0.968685	0.505882	0.891807
BIOCARTA_FAS_PATHWAY MSIGDB_C2 BIOCARTA_FAS_PATHWAY	29	0.489391	0.968353	0.490085	0.892028
POSITIVE REGULATION OF CELL CYCLE PROCESS GOBP GO:0090068	205	0.365266	0.967813	0.577181	0.892898
POSITIVE REGULATION OF CELL JUNCTION ASSEMBLY GOBP GO:1901890	21	0.51413	0.967429	0.489529	0.893309
REGULATION OF SYNAPSE ORGANIZATION GOBP GO:0050807	77	0.413275	0.967205	0.507246	0.893251
NEGATIVE REGULATION OF PHOSPHORUS METABOLIC PROCESS GOBP GO:0010563	345	0.344923	0.966627	0.585106	0.894318
FBXL10 ENHANCEMENT OF MAP/ERK SIGNALING IN DIFFUSE LARGE B-CELL LYMPHOMA WIKIPATHWAYS_20191210 WP4553 HOMO SAPIENS	17	0.534636	0.966115	0.513924	0.895153
NEGATIVE REGULATION OF PHOSPHATE METABOLIC PROCESS GOBP GO:0045936	344	0.344939	0.965627	0.555556	0.89591
DETECTION OF EXTERNAL STIMULUS GOBP GO:0009581	29	0.483528	0.965369	0.494118	0.895958
POSITIVE REGULATION OF PROTEIN LOCALIZATION TO MEMBRANE GOBP GO:1905477	87	0.404771	0.965106	0.515267	0.895954
POSITIVE REGULATION OF REACTIVE OXYGEN SPECIES BIOSYNTHETIC PROCESS GOBP GO:1903428	21	0.510295	0.964928	0.491758	0.895737
POSITIVE REGULATION OF TRANSCRIPTION OF NOTCH RECEPTOR TARGET GOBP GO:0007221	16	0.548091	0.964397	0.545455	0.896583
REGULATION OF BODY FLUID LEVELS GOBP GO:0050878	233	0.356011	0.964157	0.527778	0.896566
GLIAL CELL DIFFERENTIATION GOBP GO:0010001	59	0.425253	0.963982	0.5	0.896346
POSITIVE REGULATION OF NOTCH SIGNALING PATHWAY GOBP GO:0045747	29	0.492531	0.963875	0.511628	0.895923
TRNA AMINOACYLATION GOBP GO:0043039	46	0.452522	0.963794	0.494949	0.895408
NEGATIVE REGULATION OF PEPTIDYL-TYROSINE PHOSPHORYLATION GOBP GO:0050732	35	0.463543	0.963147	0.505848	0.896656
MITOCHONDRIAL TRNA AMINOACYLATION REACTOME R-HSA-379726.1	21	0.526075	0.963071	0.511111	0.896118
BIOCARTA_INSULIN_PATHWAY MSIGDB_C2 BIOCARTA_INSULIN_PATHWAY	19	0.534895	0.962851	0.544737	0.896004
RECIPROCAL MEIOTIC RECOMBINATION GOBP GO:0007131	36	0.469017	0.962847	0.532915	0.895255
ESTROGEN-DEPENDENT GENE EXPRESSION REACTOME DATABASE ID RELEASE 71 9018519	86	0.408711	0.962459	0.545802	0.895654
REGULATION OF PEPTIDYL-TYROSINE PHOSPHORYLATION GOBP GO:0050730	138	0.379797	0.96223	0.493274	0.895605
POSITIVE REGULATION OF EXTRACELLULAR MATRIX ORGANIZATION GOBP GO:1903055	15	0.545791	0.962027	0.5	0.8955
POSITIVE REGULATION OF EPITHELIAL CELL PROLIFERATION GOBP GO:0050679	98	0.400427	0.962002	0.54054	0.894827
SIGNAL TRANSDUCTION BY PROTEIN PHOSPHORYLATION GOBP GO:0023014	266	0.353357	0.96191	0.564886	0.89434
REGULATION OF PEPTIDASE ACTIVITY GOBP GO:0052547	193	0.365254	0.961893	0.537572	0.893632
MIRNA TARGETS IN ECM AND MEMBRANE RECEPTORS WIKIPATHWAYS_20191210 WP2911 HOMO SAPIENS	19	0.537745	0.961869	0.505348	0.892944
HISTONE PHOSPHORYLATION GOBP GO:0016572	16	0.534883	0.960873	0.527845	0.895255
SIGNAL TRANSDUCTION BY P53 CLASS MEDIATOR GOBP GO:0072331	98	0.3974	0.960691	0.535865	0.895069
EXPORT OF VIRAL RIBONUCLEOPROTEINS FROM NUCLEUS REACTOME DATABASE ID RELEASE 71 168274	26	0.499347	0.960207	0.50152	0.895824
POSITIVE REGULATION OF MITOTIC NUCLEAR DIVISION GOBP GO:0045840	39	0.458245	0.960129	0.510638	0.895327
POSITIVE REGULATION OF ADAPTIVE IMMUNE RESPONSE BASED ON SOMATIC RECOMBINATION OF IMMUNE RECEPTORS BUILT FROM IMMUNOGLOBULIN SUPERFAMILY DOMAINS GOBP GO:0002824	38	0.470089	0.960117	0.533951	0.894607
POSITIVE REGULATION OF CATION TRANSMEMBRANE TRANSPORT GOBP GO:1904064	57	0.426104	0.960057	0.481356	0.894011
NEGATIVE REGULATION OF EPITHELIAL CELL PROLIFERATION GOBP GO:0050680	61	0.429263	0.959724	0.506993	0.894285
NEP NS2 INTERACTS WITH THE CELLULAR EXPORT MACHINERY REACTOME R-HSA-168333.3	26	0.499347	0.958781	0.491803	0.896478
POSITIVE REGULATION OF FOCAL ADHESION ASSEMBLY GOBP GO:0051894	15	0.551528	0.95869	0.529412	0.895991
RESPONSE TO CALCIUM ION GOBP GO:0051592	62	0.425578	0.958072	0.511628	0.897139
STEM CELL DIFFERENTIATION GOBP GO:0048863	71	0.417302	0.95794	0.533808	0.896771
REGULATION OF PROTEIN DEACETYLATION GOBP GO:0090311	28	0.47838	0.957892	0.527697	0.896161
REGULATION OF SMOOTHENED SIGNALING PATHWAY GOBP GO:0008589	45	0.438493	0.957867	0.509259	0.895491
REGULATION OF LEUKOCYTE ACTIVATION GOBP GO:0002694	220	0.360311	0.957773	0.56213	0.895037
DIVALENT INORGANIC CATION TRANSPORT GOBP GO:0072511	146	0.370857	0.957543	0.565421	0.894977
REGULATION OF CATION TRANSMEMBRANE TRANSPORT GOBP GO:1904062	153	0.37732	0.957377	0.522388	0.89473
PIGMENTATION GOBP GO:0043473	54	0.430716	0.957364	0.503311	0.894027
MRNA METHYLATION GOBP GO:0080009	15	0.547135	0.957144	0.51715	0.893966
POSITIVE REGULATION OF MRNA CATABOLIC PROCESS GOBP GO:0061014	38	0.456918	0.956978	0.51051	0.893721
MITOCHONDRIAL OUTER MEMBRANE PERMEABILIZATION INVOLVED IN PROGRAMMED CELL DEATH GOBP GO:1902686	16	0.546261	0.956784	0.526042	0.893602
POSITIVE REGULATION OF AXONOGENESIS GOBP GO:0050772	42	0.448149	0.956143	0.490446	0.894802
POSITIVE REGULATION OF KIDNEY DEVELOPMENT GOBP GO:0090184	20	0.508707	0.955773	0.52907	0.895239
BIOCARTA_ERK5_PATHWAY MSIGDB_C2 BIOCARTA_ERK5_PATHWAY	15	0.544948	0.955498	0.531746	0.895366
PROTEIN DEPOLYMERIZATION GOBP GO:0051261	27	0.493578	0.955177	0.506631	0.895652
POSITIVE REGULATION OF BONE MINERALIZATION GOBP GO:0030501	30	0.480981	0.954984	0.545714	0.895541
POSITIVE REGULATION OF CYTOSKELETON ORGANIZATION GOBP GO:0051495	140	0.367769	0.954977	0.588785	0.894826
BIOCARTA_FMLP_PATHWAY MSIGDB_C2 BIOCARTA_FMLP_PATHWAY	32	0.474346	0.954743	0.519757	0.894785
ION TRANSMEMBRANE TRANSPORT GOBP GO:0034220	356	0.343818	0.954734	0.67033	0.894079
REGULATION OF GLUCOKINASE BY GLUCOKINASE REGULATORY PROTEIN REACTOME R-HSA-170822.3	25	0.499725	0.954672	0.508065	0.893565
GPCRS, OTHER WIKIPATHWAYS_20191210 WP117 HOMO SAPIENS	29	0.478861	0.954621	0.524927	0.892996
REGULATION OF GTPASE ACTIVITY GOBP GO:0043087	176	0.365602	0.954422	0.597826	0.892861
NEGATIVE REGULATION OF CYTOKINE PRODUCTION GOBP GO:0001818	139	0.379054	0.954164	0.556054	0.892918
TUBE FORMATION GOBP GO:0035148	49	0.438754	0.954134	0.501767	0.89227
REGULATION OF CYTOKINE BIOSYNTHETIC PROCESS GOBP GO:0042035	39	0.466816	0.95397	0.518987	0.892044
POSITIVE REGULATION OF PEPTIDYL-SERINE PHOSPHORYLATION GOBP GO:0033138	57	0.415331	0.953951	0.539735	0.891363
REGULATION OF SMOOTH MUSCLE CELL MIGRATION GOBP GO:0014910	29	0.47673	0.953909	0.511905	0.890759
DEREGULATED CDK5 TRIGGERS MULTIPLE NEURODEGENERATIVE PATHWAYS IN ALZHEIMER'S DISEASE MODELS REACTOME R-HSA-8862803.2	19	0.515635	0.953283	0.501241	0.89186
NEGATIVE REGULATION OF LIPID METABOLIC PROCESS GOBP GO:0045833	46	0.440465	0.953005	0.514881	0.891977
GLIAL CELL DEVELOPMENT GOBP GO:0021782	42	0.447338	0.952856	0.522388	0.891715
PROTEIN SECRETION GOBP GO:0009306	64	0.416185	0.952821	0.518248	0.891076
GLYCEROPHOSPHOLIPID BIOSYNTHETIC PATHWAY WIKIPATHWAYS_20191210 WP2533 HOMO SAPIENS	24	0.491931	0.952745	0.522857	0.890573
PROTEIN PALMITOYLATION GOBP GO:0018345	25	0.492516	0.952655	0.534211	0.890103
ENDODERM DIFFERENTIATION WIKIPATHWAYS_20191210 WP2853 HOMO SAPIENS	104	0.395507	0.952304	0.507812	0.89042
PEPTIDE HORMONE SECRETION GOBP GO:0030072	18	0.524439	0.951494	0.540609	0.892106
SIGNAL TRANSDUCTION IN RESPONSE TO DNA DAMAGE GOBP GO:0042770	92	0.390148	0.950885	0.575758	0.893199
NUCLEOSOME ASSEMBLY GOBP GO:0006334	56	0.421874	0.950631	0.51746	0.893246
ACTIN POLYMERIZATION OR DEPOLYMERIZATION GOBP GO:0008154	33	0.476044	0.950599	0.523659	0.892606
DEVELOPMENT OF PRIMARY SEXUAL CHARACTERISTICS GOBP GO:0045137	48	0.433177	0.949471	0.528875	0.895331
CELLULAR RESPONSE TO XENOBIOTIC STIMULUS GOBP GO:0071466	50	0.433392	0.949338	0.501629	0.894982
REGULATION OF CELLULAR PROTEIN LOCALIZATION GOBP GO:1903827	374	0.341524	0.949282	0.656566	0.894433
NEGATIVE REGULATION OF PROTEOLYSIS INVOLVED IN CELLULAR PROTEIN CATABOLIC PROCESS GOBP GO:1903051	52	0.433719	0.948591	0.530744	0.895847
UBIQUITIN PROTEASOME PATHWAY PANTHER PATHWAY P00060	40	0.454061	0.94851	0.518152	0.895372
POSITIVE REGULATION OF STRESS FIBER ASSEMBLY GOBP GO:0051496	36	0.460044	0.948467	0.5	0.894799
SODIUM ION TRANSMEMBRANE TRANSPORT GOBP GO:0035725	34	0.466917	0.948344	0.50641	0.894474
DETECTION OF ABIOTIC STIMULUS GOBP GO:0009582	31	0.466064	0.948319	0.524781	0.893832
TYPE I INTERFERON SIGNALING PATHWAY GOBP GO:0060337	32	0.468728	0.948209	0.505882	0.893429
GASTRIC CANCER NETWORK 2 WIKIPATHWAYS_20191210 WP2363 HOMO SAPIENS	26	0.488459	0.948048	0.546875	0.893188
CELLULAR RESPONSE TO AMYLOID-BETA GOBP GO:1904646	23	0.494377	0.947854	0.492347	0.893054
SIG_REGULATION_OF_THE_ACTIN_CYTOSKELETON_BY_RHO_GTPASES MSIGDB_C2 SIG_REGULATION_OF_THE_ACTIN_CYTOSKELETON_BY_RHO_GTPASES	30	0.468983	0.947264	0.503049	0.894111
POSITIVE REGULATION OF RHO PROTEIN SIGNAL TRANSDUCTION GOBP GO:0035025	18	0.524025	0.947183	0.545232	0.893663
PID_P75_NTR_PATHWAY MSIGDB_C2 PID_P75_NTR_PATHWAY	58	0.425088	0.947094	0.53605	0.893208
WNT SIGNALING PATHWAY AND PLURIPOTENCY WIKIPATHWAYS_20191210 WP399 HOMO SAPIENS	80	0.397845	0.946659	0.569288	0.89377
REGULATION OF NEUROTRANSMITTER LEVELS GOBP GO:0001505	142	0.37751	0.946629	0.502538	0.893154
REGULATION OF CHOLESTEROL BIOSYNTHESIS BY SREBP (SREBF) REACTOME R-HSA-1655829.2	52	0.430825	0.946516	0.544586	0.892776
POSITIVE REGULATION OF VIRAL TRANSCRIPTION GOBP GO:0050434	40	0.463026	0.94613	0.538226	0.893253
TP53 REGULATES TRANSCRIPTION OF CELL DEATH GENES REACTOME DATABASE ID RELEASE 71 5633008	34	0.473401	0.945798	0.507289	0.893535
CELL-CELL ADHESION VIA PLASMA-MEMBRANE ADHESION MOLECULES GOBP GO:0098742	85	0.400818	0.945344	0.592308	0.894191
ANDROGENRECEPTOR IOB ANDROGENRECEPTOR	122	0.37749	0.945074	0.559242	0.894305
REGULATION OF MITOCHONDRIAL FISSION GOBP GO:0090140	18	0.524234	0.944916	0.511628	0.894045
REGULATION OF MEMBRANE PROTEIN ECTODOMAIN PROTEOLYSIS GOBP GO:0051043	16	0.544258	0.944584	0.546703	0.894342
TUBE MORPHOGENESIS GOBP GO:0035239	246	0.350856	0.944457	0.63473	0.894017
BIOCARTA_TPO_PATHWAY MSIGDB_C2 BIOCARTA_TPO_PATHWAY	20	0.505025	0.944324	0.51715	0.893721
DETECTION OF MECHANICAL STIMULUS GOBP GO:0050982	16	0.532363	0.944212	0.556391	0.893353
LIPID LOCALIZATION GOBP GO:0010876	131	0.370687	0.944151	0.594203	0.892837
POSITIVE REGULATION OF G1/S TRANSITION OF MITOTIC CELL CYCLE GOBP GO:1900087	25	0.485634	0.94402	0.524193	0.89251
POSITIVE REGULATION OF ORGANELLE ORGANIZATION GOBP GO:0010638	444	0.337	0.943909	0.615385	0.89215
RESPONSE TO PEPTIDE GOBP GO:1901652	211	0.353103	0.943781	0.675862	0.89182
DNA INTEGRITY CHECKPOINT GOBP GO:0031570	128	0.369073	0.943704	0.582524	0.891348
MESODERMAL COMMITMENT PATHWAY WIKIPATHWAYS_20191210 WP2857 HOMO SAPIENS	112	0.380758	0.943559	0.539095	0.891054
REGULATION OF BINDING GOBP GO:0051098	222	0.352159	0.943512	0.66242	0.890481
LIPID TRANSPORT GOBP GO:0006869	123	0.376344	0.94338	0.553488	0.890169
CELLULAR RESPONSE TO TYPE I INTERFERON GOBP GO:0071357	32	0.468728	0.943082	0.519878	0.890333
PID_LYSOPHOSPHOLIPID_PATHWAY MSIGDB_C2 PID_LYSOPHOSPHOLIPID_PATHWAY	56	0.424071	0.942582	0.584665	0.891059
EPITHELIAL TO MESENCHYMAL TRANSITION IN COLORECTAL CANCER WIKIPATHWAYS_20191210 WP4239 HOMO SAPIENS	122	0.377607	0.942404	0.576763	0.890873
REGULATION OF ACTIN CYTOSKELETON ORGANIZATION GOBP GO:0032956	227	0.355578	0.941622	0.675676	0.892484
REGULATION OF CELL JUNCTION ASSEMBLY GOBP GO:1901888	67	0.413644	0.941478	0.53405	0.892209
REGULATION OF TYPE I INTERFERON-MEDIATED SIGNALING PATHWAY GOBP GO:0060338	25	0.492595	0.94126	0.507003	0.892127
PARKINSON DISEASE PANTHER PATHWAY P00049	65	0.412898	0.941161	0.555556	0.891729
RESPONSE TO HORMONE GOBP GO:0009725	340	0.34217	0.940989	0.718447	0.891556
PEPTIDYL-L-CYSTEINE S-PALMITOYLATION GOBP GO:0018230	16	0.510325	0.940757	0.53	0.891509
PROTEIN HOMOTETRAMERIZATION GOBP GO:0051289	39	0.445833	0.940716	0.526761	0.890945
REGULATION OF EMBRYONIC DEVELOPMENT GOBP GO:0045995	61	0.420432	0.940112	0.549669	0.892003
REGULATION OF ANGIOGENESIS GOBP GO:0045765	184	0.360667	0.940092	0.652174	0.891372
DIFFERENTIATION OF WHITE AND BROWN ADIPOCYTE WIKIPATHWAYS_20191210 WP2895 HOMO SAPIENS	16	0.525421	0.939896	0.555838	0.891262
REGULATION OF RECEPTOR-MEDIATED ENDOCYTOSIS GOBP GO:0048259	62	0.41696	0.938873	0.575	0.893634
TRANSITION METAL ION HOMEOSTASIS GOBP GO:0055076	73	0.39541	0.938456	0.589552	0.894186
SUMOYLATION REACTOME DATABASE ID RELEASE 71 2990846	151	0.364665	0.938395	0.603774	0.893692
SODIUM ION TRANSPORT GOBP GO:0006814	47	0.438389	0.938378	0.537975	0.893028
ESTABLISHMENT OR MAINTENANCE OF MONOPOLAR CELL POLARITY GOBP GO:0061339	15	0.530385	0.937752	0.57754	0.894174
NEUROPEPTIDE SIGNALING PATHWAY GOBP GO:0007218	19	0.512531	0.937383	0.540107	0.894638
G13 SIGNALING PATHWAY WIKIPATHWAYS_20191210 WP524 HOMO SAPIENS	35	0.453305	0.937195	0.545189	0.894468
BIOCARTA_EPO_PATHWAY MSIGDB_C2 BIOCARTA_EPO_PATHWAY	16	0.529981	0.936783	0.538462	0.894993
REPLICATION FORK PROCESSING GOBP GO:0031297	31	0.455984	0.936439	0.53719	0.895358
SPERMATID DEVELOPMENT GOBP GO:0007286	39	0.440304	0.936152	0.531157	0.895529
NEGATIVE REGULATION OF RAS PROTEIN SIGNAL TRANSDUCTION GOBP GO:0046580	31	0.45082	0.935839	0.55132	0.895768
POSITIVE REGULATION OF NERVOUS SYSTEM DEVELOPMENT GOBP GO:0051962	214	0.351446	0.935541	0.689873	0.895936
GONAD DEVELOPMENT GOBP GO:0008406	46	0.433889	0.935272	0.530351	0.896044
EPITHELIAL TUBE FORMATION GOBP GO:0072175	40	0.449273	0.934893	0.551515	0.896469
REGULATION OF DNA BINDING GOBP GO:0051101	73	0.39611	0.933916	0.586806	0.898726
POSITIVE REGULATION OF MYELOID LEUKOCYTE DIFFERENTIATION GOBP GO:0002763	20	0.503239	0.933426	0.557065	0.899465
AXO-DENDRITIC TRANSPORT GOBP GO:0008088	44	0.444295	0.933343	0.57716	0.898995
BIOCARTA_NTHI_PATHWAY MSIGDB_C2 BIOCARTA_NTHI_PATHWAY	21	0.502047	0.932983	0.545961	0.899381
HALLMARK_APOPTOSIS MSIGDB_C2 HALLMARK_APOPTOSIS	134	0.370527	0.932901	0.611374	0.898945
REGULATION OF PROTEIN TYROSINE KINASE ACTIVITY GOBP GO:0061097	50	0.431783	0.932764	0.549342	0.898729
ACTIVATION OF GENE EXPRESSION BY SREBF (SREBP) REACTOME R-HSA-2426168.2	39	0.457272	0.932571	0.563863	0.89858
MULTICELLULAR ORGANISMAL SIGNALING GOBP GO:0035637	62	0.408598	0.932446	0.56	0.898237
ADIPOGENESIS WIKIPATHWAYS_20191210 WP236 HOMO SAPIENS	101	0.377084	0.931882	0.629464	0.899169
PEPTIDE SECRETION GOBP GO:0002790	69	0.401831	0.93179	0.558394	0.898774
REGULATION OF PHOSPHATIDYLINOSITOL 3-KINASE ACTIVITY GOBP GO:0043551	29	0.465436	0.931729	0.52924	0.898279
CELLULAR RESPONSE TO KETONE GOBP GO:1901655	30	0.472645	0.931156	0.556548	0.899261
NONCANONICAL WNT SIGNALING PATHWAY PATHWAY INTERACTION DATABASE NCI-NATURE CURATED DATA NONCANONICAL WNT SIGNALING PATHWAY	31	0.458274	0.931071	0.553623	0.898808
TRANSPORT OF BILE SALTS AND ORGANIC ACIDS, METAL IONS AND AMINE COMPOUNDS REACTOME DATABASE ID RELEASE 71 425366	41	0.440962	0.930956	0.55627	0.898451
HORMONE SECRETION GOBP GO:0046879	22	0.501392	0.930857	0.555556	0.898051
CHROMATIN ORGANIZATION GOBP GO:0006325	427	0.324922	0.930334	0.855072	0.898926
NEGATIVE REGULATION OF LYMPHOCYTE DIFFERENTIATION GOBP GO:0045620	25	0.480355	0.929577	0.533693	0.900469
CELL FATE COMMITMENT GOBP GO:0045165	77	0.397193	0.929418	0.559567	0.900231
DIVALENT METAL ION TRANSPORT GOBP GO:0070838	146	0.370857	0.929252	0.64878	0.900013
ANGIOPOIETIN RECEPTOR TIE2-MEDIATED SIGNALING PATHWAY INTERACTION DATABASE NCI-NATURE CURATED DATA ANGIOPOIETIN RECEPTOR TIE2-MEDIATED SIGNALING	39	0.443503	0.928467	0.569364	0.901629
POSITIVE REGULATION OF GENE EXPRESSION, EPIGENETIC GOBP GO:0045815	51	0.431529	0.928204	0.556701	0.901697
MET ACTIVATES PTK2 SIGNALING REACTOME DATABASE ID RELEASE 71 8874081	17	0.524276	0.92814	0.568238	0.901209
IL2 SIGNALING EVENTS MEDIATED BY PI3K PATHWAY INTERACTION DATABASE NCI-NATURE CURATED DATA IL2 SIGNALING EVENTS MEDIATED BY PI3K	28	0.467927	0.927421	0.538462	0.902564
PEPTIDYL-TYROSINE AUTOPHOSPHORYLATION GOBP GO:0038083	18	0.505357	0.926902	0.55527	0.90336
NEGATIVE REGULATION OF NOTCH SIGNALING PATHWAY GOBP GO:0045746	25	0.478488	0.926649	0.567089	0.903434
NEGATIVE REGULATION OF CHROMOSOME ORGANIZATION GOBP GO:2001251	99	0.38803	0.926465	0.62844	0.903296
CONSTITUTIVE SIGNALING BY ABERRANT PI3K IN CANCER REACTOME DATABASE ID RELEASE 71 2219530	40	0.451363	0.926448	0.607784	0.902659
REGULATION OF CELL ACTIVATION GOBP GO:0050865	238	0.344368	0.926443	0.718954	0.901989
PIGMENT BIOSYNTHETIC PROCESS GOBP GO:0046148	28	0.473118	0.926416	0.56135	0.901376
POSITIVE REGULATION OF LEUKOCYTE CHEMOTAXIS GOBP GO:0002690	46	0.437092	0.925005	0.572327	0.904882
PATHWAYS REGULATING HIPPO SIGNALING WIKIPATHWAYS_20191210 WP4540 HOMO SAPIENS	68	0.400257	0.924332	0.601307	0.906113
RESPONSE TO RADIATION GOBP GO:0009314	231	0.347451	0.924313	0.727941	0.905469
CARBOHYDRATE HOMEOSTASIS GOBP GO:0033500	70	0.400835	0.923378	0.6	0.90749
REGULATION OF CHROMOSOME SEGREGATION GOBP GO:0051983	90	0.388361	0.923292	0.616	0.90704
SYNDECAN-3-MEDIATED SIGNALING EVENTS PATHWAY INTERACTION DATABASE NCI-NATURE CURATED DATA SYNDECAN-3-MEDIATED SIGNALING EVENTS	15	0.536778	0.923122	0.563636	0.906852
DEFENSE RESPONSE TO VIRUS GOBP GO:0051607	67	0.402115	0.922968	0.598616	0.906632
CDC42 SIGNALING EVENTS PATHWAY INTERACTION DATABASE NCI-NATURE CURATED DATA CDC42 SIGNALING EVENTS	63	0.401228	0.922083	0.590909	0.908644
GPCR LIGAND BINDING REACTOME R-HSA-500792.3	134	0.363585	0.92187	0.671171	0.908574
REGULATION OF G PROTEIN-COUPLED RECEPTOR SIGNALING PATHWAY GOBP GO:0008277	70	0.396701	0.921797	0.590278	0.908076
RESPONSE TO AMYLOID-BETA GOBP GO:1904645	25	0.485423	0.921307	0.580563	0.908839
PID_SHP2_PATHWAY MSIGDB_C2 PID_SHP2_PATHWAY	46	0.430564	0.92057	0.57329	0.910357
HISTONE H4 ACETYLATION GOBP GO:0043967	42	0.433779	0.920116	0.597444	0.910947
RESPONSE TO ALCOHOL GOBP GO:0097305	51	0.432986	0.919355	0.580537	0.912455
PID_CDC42_PATHWAY MSIGDB_C2 PID_CDC42_PATHWAY	63	0.401228	0.919073	0.574545	0.912599
REGULATION OF MITOCHONDRIAL OUTER MEMBRANE PERMEABILIZATION INVOLVED IN APOPTOTIC SIGNALING PATHWAY GOBP GO:1901028	37	0.445059	0.91851	0.550769	0.913531
CAMERA-TYPE EYE MORPHOGENESIS GOBP GO:0048593	33	0.4524	0.918392	0.591045	0.913235
POSITIVE REGULATION OF CELL CYCLE G1/S PHASE TRANSITION GOBP GO:1902808	34	0.449633	0.918357	0.580556	0.912663
REGULATION OF PROTEIN INSERTION INTO MITOCHONDRIAL MEMBRANE INVOLVED IN APOPTOTIC SIGNALING PATHWAY GOBP GO:1900739	22	0.484683	0.917702	0.588235	0.913847
TRNA AMINOACYLATION REACTOME R-HSA-379724.1	42	0.445081	0.917388	0.592593	0.914052
PEPTIDYL-S-DIACYLGLYCEROL-L-CYSTEINE BIOSYNTHETIC PROCESS FROM PEPTIDYL-CYSTEINE GOBP GO:0018231	16	0.510325	0.91713	0.556872	0.914104
SIGNALING BY RHO GTPASES REACTOME DATABASE ID RELEASE 71 194315	332	0.330218	0.916841	0.805085	0.914287
REGULATION OF PHOSPHATIDYLINOSITOL 3-KINASE SIGNALING GOBP GO:0014066	78	0.396492	0.916386	0.60076	0.914939
NEURODEGENERATIVE DISEASES REACTOME DATABASE ID RELEASE 71 8863678	19	0.515635	0.915581	0.586956	0.916581
ENDOSOME TRANSPORT VIA MULTIVESICULAR BODY SORTING PATHWAY GOBP GO:0032509	22	0.490411	0.915251	0.590206	0.916854
PID_IFNG_PATHWAY MSIGDB_C2 PID_IFNG_PATHWAY	35	0.449861	0.915123	0.563253	0.916556
INTERLEUKIN-6 FAMILY SIGNALING REACTOME DATABASE ID RELEASE 71 6783589	21	0.48053	0.914802	0.577657	0.916822
DNA DAMAGE CHECKPOINT GOBP GO:0000077	117	0.37389	0.914712	0.628571	0.916407
SYNTHESIS OF PIPS AT THE EARLY ENDOSOME MEMBRANE REACTOME R-HSA-1660516.7	16	0.507373	0.914183	0.556452	0.917197
NORC NEGATIVELY REGULATES RRNA EXPRESSION REACTOME DATABASE ID RELEASE 71 427413	52	0.416676	0.914016	0.59736	0.91699
RESPONSE TO XENOBIOTIC STIMULUS GOBP GO:0009410	53	0.411186	0.913818	0.569579	0.916866
HEPATITIS C AND HEPATOCELLULAR CARCINOMA WIKIPATHWAYS_20191210 WP3646 HOMO SAPIENS	43	0.436819	0.913618	0.609375	0.91676
CELL-CELL JUNCTION ASSEMBLY GOBP GO:0007043	62	0.400841	0.913348	0.603333	0.916861
RESPONSE TO UV GOBP GO:0009411	109	0.366342	0.913286	0.695652	0.916386
REGULATION OF AXON EXTENSION GOBP GO:0030516	46	0.424333	0.912667	0.589905	0.917473
SHP2 SIGNALING PATHWAY INTERACTION DATABASE NCI-NATURE CURATED DATA SHP2 SIGNALING	46	0.430564	0.912542	0.573333	0.917156
REGULATION OF INTERLEUKIN-1 BETA SECRETION GOBP GO:0050706	19	0.496516	0.912473	0.581921	0.916687
POSITIVE REGULATION OF TOLL-LIKE RECEPTOR SIGNALING PATHWAY GOBP GO:0034123	15	0.524973	0.912268	0.60241	0.91662
DEVELOPMENTAL GROWTH INVOLVED IN MORPHOGENESIS GOBP GO:0060560	42	0.43043	0.911984	0.570122	0.916814
POSITIVE REGULATION OF PROTEIN INSERTION INTO MITOCHONDRIAL MEMBRANE INVOLVED IN APOPTOTIC SIGNALING PATHWAY GOBP GO:1900740	22	0.484683	0.911969	0.592992	0.916181
POSITIVE REGULATION OF BLOOD VESSEL ENDOTHELIAL CELL MIGRATION GOBP GO:0043536	44	0.435004	0.911686	0.608151	0.916295
MITOTIC PROMETAPHASE REACTOME R-HSA-68877.5	175	0.356498	0.910469	0.721925	0.919084
HEMATOPOIETIC OR LYMPHOID ORGAN DEVELOPMENT GOBP GO:0048534	220	0.338379	0.910114	0.786164	0.919403
NEGATIVE REGULATION OF LEUKOCYTE APOPTOTIC PROCESS GOBP GO:2000107	17	0.510941	0.909987	0.575448	0.919099
IMMUNE SYSTEM DEVELOPMENT GOBP GO:0002520	242	0.33745	0.90989	0.791667	0.918712
PROTEIN POLYMERIZATION GOBP GO:0051258	56	0.40717	0.909492	0.605735	0.919144
POSITIVE REGULATION OF BINDING GOBP GO:0051099	109	0.369898	0.909338	0.682403	0.918902
ACIDIC AMINO ACID TRANSPORT GOBP GO:0015800	26	0.468894	0.909204	0.600601	0.918599
PARKIN-UBIQUITIN PROTEASOMAL SYSTEM PATHWAY WIKIPATHWAYS_20191210 WP2359 HOMO SAPIENS	51	0.413718	0.908732	0.586751	0.91928
OSTEOBLAST DIFFERENTIATION GOBP GO:0001649	62	0.402626	0.908156	0.633094	0.920256
FANCONI ANEMIA PATHWAY PATHWAY INTERACTION DATABASE NCI-NATURE CURATED DATA FANCONI ANEMIA PATHWAY	47	0.419426	0.90813	0.614243	0.91966
POSITIVE REGULATION OF STRESS-ACTIVATED MAPK CASCADE GOBP GO:0032874	106	0.370218	0.908056	0.652344	0.919187
PID_RETINOIC_ACID_PATHWAY MSIGDB_C2 PID_RETINOIC_ACID_PATHWAY	29	0.456825	0.908033	0.59944	0.918582
REGULATION OF VIRAL RELEASE FROM HOST CELL GOBP GO:1902186	24	0.476107	0.907465	0.603175	0.9195
FATTY ACID TRANSPORT GOBP GO:0015908	31	0.465439	0.907334	0.619469	0.919212
REGULATION OF INTRACELLULAR PROTEIN TRANSPORT GOBP GO:0033157	160	0.356119	0.907288	0.731343	0.918682
REGULATION OF SISTER CHROMATID COHESION GOBP GO:0007063	18	0.521578	0.907094	0.616247	0.918561
SUMO E3 LIGASES SUMOYLATE TARGET PROTEINS REACTOME R-HSA-3108232.5	145	0.361262	0.906488	0.690476	0.919701
AGE/RAGE PATHWAY WIKIPATHWAYS_20191210 WP2324 HOMO SAPIENS	54	0.407467	0.906395	0.6	0.919281
NEGATIVE REGULATION OF PROTEIN COMPLEX ASSEMBLY GOBP GO:0031333	77	0.389735	0.906097	0.644351	0.919429
SEMAPHORIN INTERACTIONS REACTOME R-HSA-373755.1	59	0.402945	0.905657	0.629893	0.920004
LEUKOCYTE CELL-CELL ADHESION GOBP GO:0007159	26	0.464235	0.905568	0.583333	0.9196
EPITHELIAL CELL PROLIFERATION GOBP GO:0050673	32	0.452469	0.905409	0.581121	0.919381
NERVOUS SYSTEM PROCESS GOBP GO:0050877	231	0.339326	0.904867	0.820809	0.920251
NEGATIVE REGULATION OF CHEMOTAXIS GOBP GO:0050922	33	0.451354	0.904832	0.579832	0.9197
NEGATIVE EPIGENETIC REGULATION OF RRNA EXPRESSION REACTOME R-HSA-5250941.2	55	0.414024	0.904826	0.609836	0.919052
PID_IL6_7_PATHWAY MSIGDB_C2 PID_IL6_7_PATHWAY	39	0.429324	0.904679	0.587459	0.91885
NEGATIVE REGULATION OF IMMUNE RESPONSE GOBP GO:0050777	57	0.414792	0.904608	0.645695	0.91839
ENDODERM DEVELOPMENT GOBP GO:0007492	35	0.438743	0.904277	0.591592	0.918647
VACUOLAR TRANSPORT GOBP GO:0007034	111	0.367198	0.904168	0.714286	0.918311
GPCRS, CLASS A RHODOPSIN-LIKE WIKIPATHWAYS_20191210 WP455 HOMO SAPIENS	63	0.395019	0.903932	0.630662	0.918281
HALLMARK_ESTROGEN_RESPONSE_EARLY MSIGDB_C2 HALLMARK_ESTROGEN_RESPONSE_EARLY	162	0.352015	0.90386	0.783069	0.917831
IL8- AND CXCR2-MEDIATED SIGNALING EVENTS PATHWAY INTERACTION DATABASE NCI-NATURE CURATED DATA IL8- AND CXCR2-MEDIATED SIGNALING EVENTS	24	0.467876	0.903287	0.617647	0.918744
OXIDATIVE STRESS RESPONSE PANTHER PATHWAY P00046	38	0.433681	0.902923	0.572271	0.919103
REGULATION OF PROTEIN SUMOYLATION GOBP GO:0033233	15	0.509393	0.902084	0.608143	0.920808
DNA REPLICATION-INDEPENDENT NUCLEOSOME ORGANIZATION GOBP GO:0034724	41	0.423184	0.901995	0.633027	0.920394
INNER EAR DEVELOPMENT GOBP GO:0048839	23	0.472986	0.901989	0.580822	0.91975
NOTCH SIGNALING PATHWAY GOBP GO:0007219	52	0.402401	0.901951	0.594203	0.919189
NEGATIVE REGULATION OF LIPID BIOSYNTHETIC PROCESS GOBP GO:0051055	33	0.447261	0.901629	0.596439	0.919435
REGULATION OF ENDOTHELIAL CELL MIGRATION GOBP GO:0010594	126	0.364072	0.901016	0.687204	0.920543
IL6-MEDIATED SIGNALING EVENTS PATHWAY INTERACTION DATABASE NCI-NATURE CURATED DATA IL6-MEDIATED SIGNALING EVENTS	39	0.429324	0.900544	0.622291	0.921185
NEGATIVE REGULATION OF TELOMERE MAINTENANCE GOBP GO:0032205	34	0.431694	0.900488	0.620588	0.920683
PID_ERBB1_RECEPTOR_PROXIMAL_PATHWAY MSIGDB_C2 PID_ERBB1_RECEPTOR_PROXIMAL_PATHWAY	34	0.440859	0.900457	0.611111	0.920112
HALLMARK_CHOLESTEROL_HOMEOSTASIS MSIGDB_C2 HALLMARK_CHOLESTEROL_HOMEOSTASIS	67	0.398369	0.900441	0.624138	0.919499
PID_ALPHA_SYNUCLEIN_PATHWAY MSIGDB_C2 PID_ALPHA_SYNUCLEIN_PATHWAY	20	0.492786	0.900399	0.597734	0.918954
ENDODERMAL CELL DIFFERENTIATION GOBP GO:0035987	27	0.456954	0.900239	0.579412	0.918762
REGULATION OF INTERLEUKIN-1 BETA PRODUCTION GOBP GO:0032651	29	0.455074	0.899339	0.603399	0.920675
ONE CARBON METABOLISM AND RELATED PATHWAYS WIKIPATHWAYS_20191210 WP3940 HOMO SAPIENS	41	0.427612	0.89933	0.621951	0.92004
REGULATION OF ESTABLISHMENT OF CELL POLARITY GOBP GO:2000114	15	0.509629	0.899176	0.617722	0.91983
RETINOIC ACID RECEPTORS-MEDIATED SIGNALING PATHWAY INTERACTION DATABASE NCI-NATURE CURATED DATA RETINOIC ACID RECEPTORS-MEDIATED SIGNALING	29	0.456825	0.899073	0.600551	0.919446
ST_G_ALPHA_I_PATHWAY MSIGDB_C2 ST_G_ALPHA_I_PATHWAY	30	0.459088	0.898933	0.628571	0.91921
REGULATION OF PROTEIN PROCESSING GOBP GO:0070613	55	0.402128	0.898725	0.599338	0.919117
POSITIVE REGULATION OF INTERLEUKIN-1 BETA PRODUCTION GOBP GO:0032731	20	0.486766	0.89825	0.624672	0.919755
MORPHOGENESIS OF EMBRYONIC EPITHELIUM GOBP GO:0016331	40	0.435815	0.898114	0.610561	0.919478
NUCLEAR CHROMOSOME SEGREGATION GOBP GO:0098813	148	0.353363	0.897639	0.77665	0.920161
SUMOYLATION OF INTRACELLULAR RECEPTORS REACTOME R-HSA-4090294.3	23	0.466347	0.897623	0.627346	0.919547
POSITIVE REGULATION OF PHOSPHATIDYLINOSITOL 3-KINASE SIGNALING GOBP GO:0014068	51	0.414459	0.897622	0.629508	0.918903
NECROTIC CELL DEATH GOBP GO:0070265	19	0.490197	0.895306	0.604584	0.92458
DNA REPLICATION-INDEPENDENT NUCLEOSOME ASSEMBLY GOBP GO:0006336	40	0.424059	0.895149	0.631068	0.924344
PHYSIOLOGICAL AND PATHOLOGICAL HYPERTROPHY OF THE HEART WIKIPATHWAYS_20191210 WP1528 HOMO SAPIENS	25	0.462545	0.894815	0.63388	0.924616
REGULATION OF TRANSPORTER ACTIVITY GOBP GO:0032409	134	0.356365	0.894695	0.716279	0.924284
HS-GAG BIOSYNTHESIS REACTOME DATABASE ID RELEASE 71 2022928	23	0.466305	0.89468	0.588732	0.923683
ENERGY METABOLISM WIKIPATHWAYS_20191210 WP1541 HOMO SAPIENS	42	0.42016	0.894501	0.622699	0.923517
POSITIVE REGULATION OF STRESS-ACTIVATED PROTEIN KINASE SIGNALING CASCADE GOBP GO:0070304	108	0.361303	0.894184	0.74477	0.923718
REGULATION OF PHOSPHOLIPASE ACTIVITY GOBP GO:0010517	39	0.421505	0.8938	0.608434	0.924135
CHROMOSOME MAINTENANCE REACTOME R-HSA-73886.2	68	0.384752	0.893736	0.66554	0.923678
POSITIVE REGULATION OF AUTOPHAGY GOBP GO:0010508	91	0.369421	0.893713	0.686131	0.923077
AMINO ACID TRANSPORT ACROSS THE PLASMA MEMBRANE REACTOME R-HSA-352230.3	21	0.477493	0.893637	0.605263	0.922629
POSITIVE REGULATION OF SUPRAMOLECULAR FIBER ORGANIZATION GOBP GO:1902905	125	0.354254	0.89295	0.767857	0.923928
ION CHANNEL TRANSPORT REACTOME DATABASE ID RELEASE 71 983712	109	0.36659	0.892751	0.70354	0.923842
POSITIVE REGULATION OF CYTOKINE PRODUCTION INVOLVED IN IMMUNE RESPONSE GOBP GO:0002720	26	0.460411	0.892561	0.605898	0.923677
REGULATION OF ION TRANSMEMBRANE TRANSPORT GOBP GO:0034765	172	0.3421	0.892461	0.79703	0.923318
REGULATION OF RESPONSE TO CYTOKINE STIMULUS GOBP GO:0060759	111	0.366756	0.892324	0.70852	0.92306
RANKL/RANK (RECEPTOR ACTIVATOR OF NFKB (LIGAND)) SIGNALING PATHWAY WIKIPATHWAYS_20191210 WP2018 HOMO SAPIENS	51	0.394617	0.892014	0.653979	0.923253
PID_WNT_NONCANONICAL_PATHWAY MSIGDB_C2 PID_WNT_NONCANONICAL_PATHWAY	31	0.458274	0.891953	0.622024	0.922779
REGULATION OF FIBROBLAST PROLIFERATION GOBP GO:0048145	42	0.416189	0.891321	0.609467	0.923816
NEGATIVE REGULATION OF FAT CELL DIFFERENTIATION GOBP GO:0045599	28	0.446298	0.891221	0.632275	0.923428
TRANSPORT OF INORGANIC CATIONS ANIONS AND AMINO ACIDS OLIGOPEPTIDES REACTOME R-HSA-425393.2	65	0.395568	0.891087	0.688742	0.923129
CERAMIDE METABOLIC PROCESS GOBP GO:0006672	45	0.406674	0.889471	0.651724	0.926792
NUCLEOBASE BIOSYNTHETIC PROCESS GOBP GO:0046112	16	0.490498	0.88882	0.584577	0.927906
BIOCARTA_ARF_PATHWAY MSIGDB_C2 BIOCARTA_ARF_PATHWAY	15	0.509045	0.888806	0.624021	0.927298
ENDODERM FORMATION GOBP GO:0001706	31	0.44995	0.888565	0.586402	0.927293
INTRA-GOLGI TRAFFIC REACTOME R-HSA-6811438.1	41	0.425967	0.88834	0.603125	0.927226
SIG_PIP3_SIGNALING_IN_CARDIAC_MYOCTES MSIGDB_C2 SIG_PIP3_SIGNALING_IN_CARDIAC_MYOCTES	56	0.405085	0.888302	0.642612	0.926687
TCR SIGNALING IN NAIVE CD8+ T CELLS PATHWAY INTERACTION DATABASE NCI-NATURE CURATED DATA TCR SIGNALING IN NAIVE CD8+ T CELLS	30	0.432813	0.887574	0.607717	0.927973
PROTEIN SUMOYLATION GOBP GO:0016925	49	0.405472	0.88746	0.635417	0.927635
REGULATION OF VASCULATURE DEVELOPMENT GOBP GO:1901342	208	0.339401	0.887278	0.818182	0.927506
PROTEIN COMPLEX OLIGOMERIZATION GOBP GO:0051259	121	0.352788	0.88708	0.801932	0.927402
DISASSEMBLY OF THE DESTRUCTION COMPLEX AND RECRUITMENT OF AXIN TO THE MEMBRANE REACTOME R-HSA-4641262.3	26	0.453551	0.885963	0.593123	0.929855
METAPHASE PLATE CONGRESSION GOBP GO:0051310	50	0.401464	0.885824	0.658385	0.929591
POSITIVE REGULATION OF PROTEIN DEPHOSPHORYLATION GOBP GO:0035307	25	0.446669	0.885809	0.606557	0.928996
CENTROSOME DUPLICATION GOBP GO:0051298	27	0.459872	0.885715	0.626405	0.928599
REGULATION OF METAPHASE/ANAPHASE TRANSITION OF CELL CYCLE GOBP GO:1902099	50	0.398025	0.885712	0.665563	0.927963
DEVELOPMENTAL PROCESS INVOLVED IN REPRODUCTION GOBP GO:0003006	147	0.345325	0.885318	0.783019	0.928395
RAS SIGNALING WIKIPATHWAYS_20191210 WP4223 HOMO SAPIENS	133	0.351615	0.885118	0.775785	0.928302
FLUOROPYRIMIDINE ACTIVITY WIKIPATHWAYS_20191210 WP1601 HOMO SAPIENS	26	0.451581	0.885103	0.621483	0.927698
POSITIVE REGULATION OF BMP SIGNALING PATHWAY GOBP GO:0030513	17	0.487394	0.88459	0.609375	0.928411
REGULATION OF PROTEIN MATURATION GOBP GO:1903317	56	0.398881	0.884458	0.653846	0.928101
CYTOCHROME P450 - ARRANGED BY SUBSTRATE TYPE REACTOME DATABASE ID RELEASE 71 211897	26	0.445414	0.884036	0.638889	0.928588
POSITIVE REGULATION OF PHOSPHOLIPASE C ACTIVITY GOBP GO:0010863	24	0.448416	0.883624	0.622829	0.928987
IL1 AND MEGAKARYOCYTES IN OBESITY WIKIPATHWAYS_20191210 WP2865 HOMO SAPIENS	15	0.513918	0.883414	0.624366	0.928872
CORTICAL ACTIN CYTOSKELETON ORGANIZATION GOBP GO:0030866	24	0.459834	0.883306	0.625995	0.928533
SLC TRANSPORTER DISORDERS REACTOME R-HSA-5619102.5	59	0.396998	0.883293	0.691803	0.927937
POSITIVE REGULATION OF INTERLEUKIN-1 PRODUCTION GOBP GO:0032732	21	0.462133	0.881475	0.62536	0.932076
POSITIVE REGULATION OF ANGIOGENESIS GOBP GO:0045766	101	0.367591	0.881225	0.751073	0.932141
BIOCARTA_ATRBRCA_PATHWAY MSIGDB_C2 BIOCARTA_ATRBRCA_PATHWAY	21	0.472333	0.881221	0.596774	0.931513
REGULATION OF CYTOKINESIS GOBP GO:0032465	66	0.400042	0.881148	0.647458	0.931067
REGULATION OF CELL CYCLE ARREST GOBP GO:0071156	88	0.369652	0.881123	0.719512	0.930503
PID_IL8_CXCR2_PATHWAY MSIGDB_C2 PID_IL8_CXCR2_PATHWAY	24	0.467875	0.880979	0.637838	0.930227
APOPTOTIC MITOCHONDRIAL CHANGES GOBP GO:0008637	41	0.407253	0.880733	0.655689	0.930258
PID_AP1_PATHWAY MSIGDB_C2 PID_AP1_PATHWAY	50	0.398943	0.880624	0.642857	0.929928
REGULATION OF DEFENSE RESPONSE TO VIRUS GOBP GO:0050688	47	0.417234	0.880253	0.645768	0.930246
POSITIVE REGULATION OF DNA RECOMBINATION GOBP GO:0045911	22	0.477181	0.880098	0.638728	0.930016
CELL ADHESION MEDIATED BY INTEGRIN GOBP GO:0033627	20	0.47344	0.87969	0.627297	0.930468
REGULATION OF PATHWAY-RESTRICTED SMAD PROTEIN PHOSPHORYLATION GOBP GO:0060393	39	0.413529	0.879243	0.662338	0.931069
HISTONE EXCHANGE GOBP GO:0043486	40	0.418506	0.879088	0.660661	0.930864
REGULATION OF SYNAPTIC PLASTICITY GOBP GO:0048167	69	0.383443	0.87897	0.664286	0.930554
NEGATIVE REGULATION OF REACTIVE OXYGEN SPECIES METABOLIC PROCESS GOBP GO:2000378	19	0.485892	0.878684	0.643411	0.930678
NEGATIVE REGULATION OF ENDOTHELIAL CELL MIGRATION GOBP GO:0010596	41	0.416381	0.87798	0.658683	0.931936
VPR-MEDIATED NUCLEAR IMPORT OF PICS REACTOME DATABASE ID RELEASE 71 180910	28	0.441095	0.87779	0.628242	0.931762
REGULATION OF WNT/B-CATENIN SIGNALING BY SMALL MOLECULE COMPOUNDS WIKIPATHWAYS_20191210 WP3664 HOMO SAPIENS	15	0.50348	0.876793	0.627249	0.933843
REGULATION OF EXTENT OF CELL GROWTH GOBP GO:0061387	50	0.40426	0.876633	0.680511	0.933627
ANATOMICAL STRUCTURE HOMEOSTASIS GOBP GO:0060249	156	0.340378	0.876485	0.856383	0.933377
EFFECTS OF PIP2 HYDROLYSIS REACTOME R-HSA-114508.2	22	0.453557	0.876235	0.611825	0.933421
SIGNALING BY NTRK1 (TRKA) REACTOME DATABASE ID RELEASE 71 187037	73	0.379387	0.876197	0.710526	0.932893
ENDOMEMBRANE SYSTEM ORGANIZATION GOBP GO:0010256	297	0.321308	0.876161	0.943548	0.932353
AXONAL TRANSPORT GOBP GO:0098930	39	0.414986	0.87602	0.661765	0.932104
AP-1 TRANSCRIPTION FACTOR NETWORK PATHWAY INTERACTION DATABASE NCI-NATURE CURATED DATA AP-1 TRANSCRIPTION FACTOR NETWORK	50	0.398943	0.875931	0.645695	0.931703
NEGATIVE REGULATION OF MRNA METABOLIC PROCESS GOBP GO:1903312	59	0.391163	0.875676	0.697279	0.931759
PERIPHERAL NERVOUS SYSTEM DEVELOPMENT GOBP GO:0007422	27	0.448557	0.874638	0.598266	0.933819
POSITIVE REGULATION OF DNA REPAIR GOBP GO:0045739	58	0.387262	0.874607	0.665625	0.933269
ALPHA-SYNUCLEIN SIGNALING PATHWAY INTERACTION DATABASE NCI-NATURE CURATED DATA ALPHA-SYNUCLEIN SIGNALING	17	0.486845	0.874039	0.632153	0.934159
SINGLE FERTILIZATION GOBP GO:0007338	30	0.442613	0.873914	0.633431	0.933848
BIOCARTA_G2_PATHWAY MSIGDB_C2 BIOCARTA_G2_PATHWAY	23	0.454797	0.872951	0.648352	0.935754
RESPONSE TO TOXIC SUBSTANCE GOBP GO:0009636	104	0.362236	0.87276	0.766393	0.935586
POSITIVE REGULATION OF ACTIN FILAMENT BUNDLE ASSEMBLY GOBP GO:0032233	39	0.423597	0.872551	0.649351	0.935498
HOMOLOGOUS RECOMBINATION GOBP GO:0035825	37	0.417136	0.871177	0.681948	0.938326
SEMAPHORIN-PLEXIN SIGNALING PATHWAY GOBP GO:0071526	31	0.42635	0.870907	0.652439	0.938377
POSITIVE REGULATION OF PRODUCTION OF MOLECULAR MEDIATOR OF IMMUNE RESPONSE GOBP GO:0002702	42	0.413402	0.870134	0.666667	0.939702
SUMOYLATION OF DNA REPLICATION PROTEINS REACTOME R-HSA-4615885.3	40	0.414638	0.869121	0.674627	0.941672
REGULATION OF NUCLEOCYTOPLASMIC TRANSPORT GOBP GO:0046822	69	0.377738	0.86839	0.753731	0.942885
POTASSIUM ION TRANSMEMBRANE TRANSPORT GOBP GO:0071805	57	0.388182	0.868372	0.676375	0.942306
PID_CD8_TCR_PATHWAY MSIGDB_C2 PID_CD8_TCR_PATHWAY	30	0.432813	0.868196	0.665753	0.942122
METABOLISM OF POLYAMINES REACTOME R-HSA-351202.3	55	0.387001	0.867614	0.678832	0.943051
REGULATION OF POSTSYNAPSE ORGANIZATION GOBP GO:0099175	36	0.421251	0.867447	0.657303	0.942859
CILIARY LANDSCAPE WIKIPATHWAYS_20191210 WP4352 HOMO SAPIENS	202	0.330244	0.867357	0.89759	0.942459
HETEROTRIMERIC G-PROTEIN SIGNALING PATHWAY-GQ ALPHA AND GO ALPHA MEDIATED PATHWAY PANTHER PATHWAY P00027	61	0.390121	0.867226	0.717857	0.942149
REGULATION OF ORNITHINE DECARBOXYLASE (ODC) REACTOME R-HSA-350562.2	48	0.393764	0.865313	0.749164	0.946304
POSITIVE REGULATION OF VASCULATURE DEVELOPMENT GOBP GO:1904018	115	0.347554	0.865105	0.854626	0.946199
ESTABLISHMENT OR MAINTENANCE OF CELL POLARITY GOBP GO:0007163	130	0.337904	0.865064	0.830097	0.945683
REGULATION OF CYTOKINE-MEDIATED SIGNALING PATHWAY GOBP GO:0001959	101	0.361192	0.864993	0.778723	0.945251
SYNTHESIS OF BILE ACIDS AND BILE SALTS REACTOME DATABASE ID RELEASE 71 192105	20	0.469831	0.864538	0.65625	0.945761
CANONICAL AND NON-CANONICAL TGF-B SIGNALING WIKIPATHWAYS_20191210 WP3874 HOMO SAPIENS	17	0.474138	0.864504	0.633735	0.945204
BLADDER CANCER WIKIPATHWAYS_20191210 WP2828 HOMO SAPIENS	34	0.417533	0.864387	0.67101	0.944884
BMAL1:CLOCK,NPAS2 ACTIVATES CIRCADIAN GENE EXPRESSION REACTOME DATABASE ID RELEASE 71 1368108	24	0.448495	0.864293	0.636856	0.944511
COPI-MEDIATED ANTEROGRADE TRANSPORT REACTOME DATABASE ID RELEASE 71 6807878	77	0.376434	0.864158	0.764228	0.944224
NEGATIVE REGULATION OF MICROTUBULE DEPOLYMERIZATION GOBP GO:0007026	18	0.484717	0.864078	0.641604	0.943807
REGULATION OF MITOTIC METAPHASE/ANAPHASE TRANSITION GOBP GO:0030071	50	0.398025	0.863792	0.703833	0.943912
BIOCARTA_GPCR_PATHWAY MSIGDB_C2 BIOCARTA_GPCR_PATHWAY	28	0.438375	0.863443	0.661631	0.944164
POSITIVE REGULATION OF MITOTIC SISTER CHROMATID SEGREGATION GOBP GO:0062033	20	0.458172	0.863339	0.658263	0.94379
NRAGE SIGNALS DEATH THROUGH JNK REACTOME R-HSA-193648.1	46	0.403382	0.862217	0.710059	0.945998
ACYLGLYCEROL CATABOLIC PROCESS GOBP GO:0046464	15	0.489983	0.861967	0.650943	0.946015
GLUTAMATE METABOLIC PROCESS GOBP GO:0006536	15	0.497468	0.861932	0.637076	0.945492
NEUTRAL LIPID CATABOLIC PROCESS GOBP GO:0046461	15	0.489983	0.861608	0.634465	0.945674
CELLULAR EXTRAVASATION GOBP GO:0045123	17	0.491194	0.860756	0.661539	0.947265
SIGNALING BY PDGF REACTOME R-HSA-186797.3	37	0.414326	0.860642	0.674095	0.946917
MATURATION OF 5.8S RRNA GOBP GO:0000460	31	0.428452	0.860207	0.658892	0.947363
CHROMOSOME LOCALIZATION GOBP GO:0050000	55	0.383726	0.859933	0.720257	0.947445
REGULATION OF SISTER CHROMATID SEGREGATION GOBP GO:0033045	71	0.369367	0.859654	0.754448	0.947512
ANGIOPOIETIN LIKE PROTEIN 8 REGULATORY PATHWAY WIKIPATHWAYS_20191210 WP3915 HOMO SAPIENS	112	0.349964	0.859324	0.80543	0.947698
REGULATION OF MITOTIC SISTER CHROMATID SEGREGATION GOBP GO:0033047	63	0.377921	0.859202	0.733333	0.947384
REGULATION OF MITOTIC SISTER CHROMATID SEPARATION GOBP GO:0010965	53	0.38913	0.858203	0.710345	0.949242
REGULATION OF ERK1 AND ERK2 CASCADE GOBP GO:0070372	138	0.346131	0.857462	0.807692	0.950403
TRNA-CONTAINING RIBONUCLEOPROTEIN COMPLEX EXPORT FROM NUCLEUS GOBP GO:0071431	30	0.424493	0.857411	0.677778	0.949899
FCGAMMA RECEPTOR (FCGR) DEPENDENT PHAGOCYTOSIS REACTOME R-HSA-2029480.1	68	0.376056	0.857283	0.749049	0.949594
MITOCHONDRIAL FUSION GOBP GO:0008053	16	0.471106	0.856923	0.664894	0.949856
RETT SYNDROME CAUSING GENES WIKIPATHWAYS_20191210 WP4312 HOMO SAPIENS	36	0.414376	0.856792	0.69697	0.949573
TYPE II INTERFERON SIGNALING (IFNG) WIKIPATHWAYS_20191210 WP619 HOMO SAPIENS	20	0.458363	0.856475	0.622951	0.949773
CYTOKINE PRODUCTION GOBP GO:0001816	57	0.393873	0.85624	0.71875	0.949759
SIGNALING BY WNT IN CANCER REACTOME R-HSA-4791275.2	30	0.429559	0.856003	0.668605	0.949698
INTERFERON-GAMMA SIGNALING PATHWAY PANTHER PATHWAY P00035	26	0.441056	0.854989	0.652299	0.951529
CHLORIDE TRANSMEMBRANE TRANSPORT GOBP GO:1902476	16	0.46972	0.854835	0.643045	0.9513
REGULATION OF CHROMOSOME SEPARATION GOBP GO:1905818	56	0.388949	0.854617	0.696667	0.951188
CELLULAR POTASSIUM ION TRANSPORT GOBP GO:0071804	57	0.388182	0.853689	0.754448	0.952817
POSITIVE REGULATION OF CYTOKINE SECRETION GOBP GO:0050715	53	0.389913	0.853443	0.752443	0.95276
NOTCH NETPATH NOTCH	66	0.375782	0.853381	0.745928	0.9523
POSITIVE REGULATION OF TELOMERASE ACTIVITY GOBP GO:0051973	32	0.416776	0.85289	0.675676	0.952874
CHOLESTEROL METABOLISM (INCLUDES BOTH BLOCH AND KANDUTSCH-RUSSELL PATHWAYS) WIKIPATHWAYS_20191210 WP4718 HOMO SAPIENS	40	0.40118	0.850322	0.707237	0.958499
NEGATIVE REGULATION OF THE PI3K AKT NETWORK REACTOME R-HSA-199418.3	71	0.365904	0.849964	0.774193	0.958744
ERBB4 SIGNALING EVENTS PATHWAY INTERACTION DATABASE NCI-NATURE CURATED DATA ERBB4 SIGNALING EVENTS	25	0.447848	0.84968	0.664062	0.958798
SOMITE DEVELOPMENT GOBP GO:0061053	15	0.482654	0.849321	0.669271	0.959063
TRANSCRIPTIONAL REGULATION BY MECP2 REACTOME R-HSA-8986944.2	41	0.401992	0.84908	0.734513	0.959018
EPH-EPHRIN MEDIATED REPULSION OF CELLS REACTOME R-HSA-3928665.3	37	0.413867	0.848504	0.703488	0.959837
IL4 NETPATH IL4	58	0.376751	0.847895	0.789116	0.960699
ACTION POTENTIAL GOBP GO:0001508	47	0.390307	0.847868	0.738516	0.960137
REGULATION OF PHOSPHOLIPASE C ACTIVITY GOBP GO:1900274	27	0.427443	0.847258	0.677515	0.96099
TIGHT JUNCTION INTERACTIONS REACTOME DATABASE ID RELEASE 71 420029	15	0.485192	0.847216	0.664962	0.960487
POSITIVE REGULATION OF CYTOKINESIS GOBP GO:0032467	26	0.441201	0.846948	0.675325	0.960491
POSITIVE REGULATION OF TELOMERE MAINTENANCE VIA TELOMERASE GOBP GO:0032212	30	0.425201	0.846801	0.703264	0.960227
MORPHOGENESIS OF A BRANCHING STRUCTURE GOBP GO:0001763	43	0.401539	0.84667	0.72093	0.959901
SISTER CHROMATID SEGREGATION GOBP GO:0000819	114	0.344993	0.845813	0.786667	0.961375
ANTEROGRADE AXONAL TRANSPORT GOBP GO:0008089	32	0.423575	0.845688	0.663743	0.961061
REGULATION OF MITOTIC SPINDLE ASSEMBLY GOBP GO:1901673	19	0.456636	0.845594	0.676845	0.960665
REGULATION OF SMAD PROTEIN SIGNAL TRANSDUCTION GOBP GO:0060390	18	0.471625	0.844927	0.68254	0.96163
REGULATION OF TRANSMEMBRANE TRANSPORT GOBP GO:0034762	213	0.317704	0.843923	0.981707	0.963395
NOTCH IOB NOTCH	67	0.373513	0.843499	0.754209	0.963815
CELL-CELL JUNCTION ORGANIZATION REACTOME DATABASE ID RELEASE 71 421270	34	0.414091	0.843268	0.72807	0.963737
RECEPTOR-MEDIATED ENDOCYTOSIS GOBP GO:0006898	97	0.349356	0.842915	0.839844	0.963968
MIRNA REGULATION OF DNA DAMAGE RESPONSE WIKIPATHWAYS_20191210 WP1530 HOMO SAPIENS	67	0.364716	0.842642	0.776952	0.963976
MEMBRANE DOCKING GOBP GO:0022406	149	0.330024	0.842463	0.927778	0.963785
NEGATIVE REGULATION OF CYTOKINE SECRETION GOBP GO:0050710	30	0.427581	0.842204	0.699717	0.963816
SURFACTANT METABOLISM REACTOME R-HSA-5683826.3	15	0.476483	0.842001	0.67313	0.963667
MIRNAS INVOLVEMENT IN THE IMMUNE RESPONSE IN SEPSIS WIKIPATHWAYS_20191210 WP4329 HOMO SAPIENS	26	0.415692	0.841945	0.669591	0.96317
POSITIVE REGULATION OF TELOMERE MAINTENANCE VIA TELOMERE LENGTHENING GOBP GO:1904358	33	0.41223	0.84161	0.6997	0.963352
REGULATION OF NUCLEAR BETA CATENIN SIGNALING AND TARGET GENE TRANSCRIPTION PATHWAY INTERACTION DATABASE NCI-NATURE CURATED DATA REGULATION OF NUCLEAR BETA CATENIN SIGNALING AND TARGET GENE TRANSCRIPTION	61	0.373063	0.841159	0.782468	0.963812
TRNA EXPORT FROM NUCLEUS GOBP GO:0006409	30	0.424493	0.841115	0.696793	0.963292
REGULATION OF ERBB SIGNALING PATHWAY GOBP GO:1901184	70	0.366081	0.84077	0.813953	0.963453
REGULATION OF CHROMOSOME ORGANIZATION GOBP GO:0033044	281	0.308135	0.840671	1	0.963077
CELLULAR TRANSITION METAL ION HOMEOSTASIS GOBP GO:0046916	65	0.370831	0.840116	0.8125	0.963781
NEURON MIGRATION GOBP GO:0001764	36	0.402762	0.839166	0.722222	0.965394
PID_FANCONI_PATHWAY MSIGDB_C2 PID_FANCONI_PATHWAY	46	0.390488	0.839135	0.732704	0.964852
REGULATION OF TUBE DIAMETER GOBP GO:0035296	40	0.398245	0.839069	0.715116	0.964409
LIPID PHOSPHORYLATION GOBP GO:0046834	39	0.409381	0.83887	0.733119	0.964291
ANTIGEN PROCESSING AND PRESENTATION OF PEPTIDE OR POLYSACCHARIDE ANTIGEN VIA MHC CLASS II GOBP GO:0002504	74	0.359123	0.838743	0.796491	0.963948
MECP2 AND ASSOCIATED RETT SYNDROME WIKIPATHWAYS_20191210 WP3584 HOMO SAPIENS	52	0.38717	0.838698	0.730303	0.963433
NEGATIVE REGULATION OF RECEPTOR-MEDIATED ENDOCYTOSIS GOBP GO:0048261	17	0.458803	0.83825	0.70398	0.963832
REGULATION OF TRANSMEMBRANE TRANSPORTER ACTIVITY GOBP GO:0022898	127	0.3311	0.837764	0.914798	0.964367
REGULATION OF BLOOD VESSEL SIZE GOBP GO:0050880	40	0.398245	0.837307	0.715116	0.964819
THE HUMAN IMMUNE RESPONSE TO TUBERCULOSIS WIKIPATHWAYS_20191210 WP4197 HOMO SAPIENS	20	0.456355	0.837122	0.713881	0.96467
MITOCHONDRIAL RNA PROCESSING GOBP GO:0000963	16	0.471193	0.83681	0.696	0.964743
DEVELOPMENTAL PIGMENTATION GOBP GO:0048066	21	0.450901	0.836421	0.701087	0.965027
PEPTIDYL-THREONINE PHOSPHORYLATION GOBP GO:0018107	56	0.381917	0.836161	0.780328	0.965003
NEUROBLAST PROLIFERATION GOBP GO:0007405	15	0.475217	0.835929	0.693431	0.96495
XBP1(S) ACTIVATES CHAPERONE GENES REACTOME DATABASE ID RELEASE 71 381038	44	0.383293	0.834833	0.70948	0.966798
REGULATION OF BLOOD VESSEL DIAMETER GOBP GO:0097746	40	0.398245	0.834324	0.728358	0.967357
NEGATIVE REGULATION OF TOR SIGNALING GOBP GO:0032007	36	0.404643	0.833968	0.742765	0.967521
FERTILIZATION GOBP GO:0009566	33	0.418228	0.833663	0.717514	0.967584
REGULATION OF PROTEIN TARGETING TO MITOCHONDRION GOBP GO:1903214	35	0.40429	0.833644	0.71517	0.96702
POSITIVE REGULATION OF RELEASE OF CYTOCHROME C FROM MITOCHONDRIA GOBP GO:0090200	21	0.456845	0.833492	0.67033	0.966754
NEGATIVE REGULATION OF RESPONSE TO ENDOPLASMIC RETICULUM STRESS GOBP GO:1903573	36	0.402824	0.832944	0.712538	0.967368
MATURATION OF 5.8S RRNA FROM TRICISTRONIC RRNA TRANSCRIPT (SSU-RRNA, 5.8S RRNA, LSU-RRNA) GOBP GO:0000466	19	0.456688	0.832544	0.69837	0.967632
CORTICOTROPIN-RELEASING HORMONE SIGNALING PATHWAY WIKIPATHWAYS_20191210 WP2355 HOMO SAPIENS	65	0.370043	0.832423	0.748201	0.967283
PROTEIN ACYLATION GOBP GO:0043543	128	0.333865	0.831145	0.921053	0.969606
ANTIGEN PROCESSING AND PRESENTATION OF PEPTIDE ANTIGEN VIA MHC CLASS II GOBP GO:0002495	74	0.359123	0.8311	0.816901	0.969089
REGULATION OF TUBE SIZE GOBP GO:0035150	40	0.398245	0.831051	0.72619	0.968598
HORMONE TRANSPORT GOBP GO:0009914	24	0.43145	0.830856	0.696891	0.968426
POSITIVE REGULATION OF DENDRITIC SPINE DEVELOPMENT GOBP GO:0060999	21	0.437957	0.829862	0.715736	0.97006
FAS LIGAND (FASL) PATHWAY AND STRESS INDUCTION OF HEAT SHOCK PROTEINS (HSP) REGULATION WIKIPATHWAYS_20191210 WP314 HOMO SAPIENS	38	0.404562	0.829789	0.713846	0.969638
REGULATION OF HEART MORPHOGENESIS GOBP GO:2000826	25	0.420394	0.829391	0.72118	0.969916
PYRIMIDINE DEOXYRIBONUCLEOTIDE METABOLIC PROCESS GOBP GO:0009219	15	0.481199	0.829195	0.688312	0.969751
VASCULAR ENDOTHELIAL GROWTH FACTOR SIGNALING PATHWAY GOBP GO:0038084	15	0.471906	0.828329	0.700521	0.971082
SLC-MEDIATED TRANSMEMBRANE TRANSPORT REACTOME R-HSA-425407.3	141	0.327272	0.828253	0.947368	0.970655
POSITIVE REGULATION OF ION TRANSPORT GOBP GO:0043270	107	0.342178	0.828239	0.854626	0.970084
RHO GTPASE EFFECTORS REACTOME R-HSA-195258.3	226	0.305622	0.82819	0.985185	0.969604
NEGATIVE REGULATION OF AXON GUIDANCE GOBP GO:1902668	16	0.464961	0.828001	0.715365	0.969396
POSITIVE REGULATION OF LIPASE ACTIVITY GOBP GO:0060193	36	0.408842	0.827929	0.706553	0.968971
ANTIGEN PROCESSING AND PRESENTATION OF EXOGENOUS PEPTIDE ANTIGEN VIA MHC CLASS II GOBP GO:0019886	74	0.359123	0.827483	0.822064	0.969393
SIGNALING BY NTRKS REACTOME DATABASE ID RELEASE 71 166520	91	0.35186	0.827446	0.879377	0.96886
RECEPTOR LOCALIZATION TO SYNAPSE GOBP GO:0097120	18	0.44363	0.825919	0.728426	0.97162
CHEMOKINE SIGNALING PATHWAY WIKIPATHWAYS_20191210 WP3929 HOMO SAPIENS	97	0.345396	0.825814	0.831224	0.971246
REGULATION OF NON-CANONICAL WNT SIGNALING PATHWAY GOBP GO:2000050	16	0.454688	0.825561	0.682741	0.971185
REGULATION OF NEURAL PRECURSOR CELL PROLIFERATION GOBP GO:2000177	22	0.437848	0.825488	0.69146	0.970733
RNA POLYMERASE III TRANSCRIPTION INITIATION REACTOME R-HSA-76046.2	35	0.403295	0.825348	0.746988	0.970435
RESOLUTION OF SISTER CHROMATID COHESION REACTOME R-HSA-2500257.1	102	0.346039	0.824605	0.878261	0.971435
POSITIVE REGULATION OF LEUKOCYTE CELL-CELL ADHESION GOBP GO:1903039	97	0.345814	0.824505	0.871212	0.971036
ESTABLISHMENT OF CHROMOSOME LOCALIZATION GOBP GO:0051303	54	0.372926	0.823976	0.812298	0.971591
SOMATIC DIVERSIFICATION OF IMMUNE RECEPTORS GOBP GO:0002200	24	0.424923	0.823867	0.710027	0.971218
PROTEIN LOCALIZATION TO CYTOSKELETON GOBP GO:0044380	34	0.411093	0.823816	0.739003	0.970716
REGULATION OF LIPID BIOSYNTHETIC PROCESS GOBP GO:0046890	120	0.334072	0.823339	0.895238	0.97117
CALCIUM ION REGULATED EXOCYTOSIS GOBP GO:0017156	33	0.404219	0.823189	0.740964	0.97089
MITOTIC METAPHASE PLATE CONGRESSION GOBP GO:0007080	44	0.392133	0.820413	0.748447	0.976177
CELL DIFFERENTIATION INVOLVED IN KIDNEY DEVELOPMENT GOBP GO:0061005	18	0.456944	0.820401	0.69086	0.975602
DEOXYRIBONUCLEOTIDE CATABOLIC PROCESS GOBP GO:0009264	16	0.458522	0.819804	0.7025	0.976308
RNA POLYMERASE III TRANSCRIPTION INITIATION FROM TYPE 2 PROMOTER REACTOME R-HSA-76066.2	26	0.419149	0.819496	0.739496	0.976354
PROTEIN EXIT FROM ENDOPLASMIC RETICULUM GOBP GO:0032527	24	0.434142	0.819077	0.741047	0.976638
REGULATION OF DENDRITIC SPINE DEVELOPMENT GOBP GO:0060998	37	0.392591	0.818905	0.775623	0.976401
REGULATION OF NITRIC OXIDE BIOSYNTHETIC PROCESS GOBP GO:0045428	28	0.415592	0.818538	0.741047	0.976561
ANATOMICAL STRUCTURE MATURATION GOBP GO:0071695	38	0.391301	0.818013	0.775281	0.977084
PID_BETA_CATENIN_NUC_PATHWAY MSIGDB_C2 PID_BETA_CATENIN_NUC_PATHWAY	60	0.367486	0.817895	0.787375	0.976733
REGULATION OF LYASE ACTIVITY GOBP GO:0051339	19	0.439845	0.817775	0.7175	0.9764
NEGATIVE REGULATION OF EPITHELIAL TO MESENCHYMAL TRANSITION GOBP GO:0010719	17	0.449995	0.817632	0.69086	0.976122
REGULATION OF INSULIN SECRETION INVOLVED IN CELLULAR RESPONSE TO GLUCOSE STIMULUS GOBP GO:0061178	17	0.449108	0.816735	0.722365	0.977378
SIGNAL RELEASE GOBP GO:0023061	64	0.357931	0.816511	0.826389	0.977257
REGULATION OF RAS PROTEIN SIGNAL TRANSDUCTION GOBP GO:0046578	102	0.33216	0.816359	0.923695	0.976963
ACTIVATION OF ADENYLATE CYCLASE ACTIVITY GOBP GO:0007190	15	0.47974	0.81565	0.72335	0.977779
TRNA TRANSPORT GOBP GO:0051031	32	0.408343	0.815553	0.749288	0.977374
REGULATION OF CHROMATIN ORGANIZATION GOBP GO:1902275	139	0.319582	0.815252	0.957746	0.977402
MAMMARY GLAND DEVELOPMENT PATHWAY - PREGNANCY AND LACTATION (STAGE 3 OF 4) WIKIPATHWAYS_20191210 WP2817 HOMO SAPIENS	23	0.426387	0.814961	0.737127	0.977398
REGULATION OF DOUBLE-STRAND BREAK REPAIR VIA NONHOMOLOGOUS END JOINING GOBP GO:2001032	24	0.433337	0.814729	0.737265	0.977277
PROTEIN STABILIZATION GOBP GO:0050821	140	0.320177	0.814125	0.944162	0.97796
DNA DAMAGE RESPONSE WIKIPATHWAYS_20191210 WP707 HOMO SAPIENS	65	0.36541	0.813922	0.804878	0.97777
B CELL DIFFERENTIATION GOBP GO:0030183	37	0.392688	0.813172	0.784848	0.978694
INORGANIC ANION TRANSMEMBRANE TRANSPORT GOBP GO:0098661	25	0.421282	0.812848	0.729483	0.978751
ACTIVATION OF RRNA EXPRESSION BY ERCC6 (CSB) AND EHMT2 (G9A) REACTOME R-HSA-427389.2	23	0.444312	0.812377	0.71547	0.979082
NEUTRAL AMINO ACID TRANSPORT GOBP GO:0015804	21	0.429141	0.811526	0.722222	0.980252
NEGATIVE REGULATION OF MULTI-ORGANISM PROCESS GOBP GO:0043901	89	0.346432	0.811379	0.883895	0.979977
POTASSIUM ION IMPORT GOBP GO:0010107	17	0.444354	0.811288	0.703608	0.979563
HIV-1 NEF: NEGATIVE EFFECTOR OF FAS AND TNF-ALPHA PATHWAY INTERACTION DATABASE NCI-NATURE CURATED DATA HIV-1 NEF: NEGATIVE EFFECTOR OF FAS AND TNF-ALPHA	28	0.399848	0.811054	0.756598	0.979425
COREGULATION OF ANDROGEN RECEPTOR ACTIVITY PATHWAY INTERACTION DATABASE NCI-NATURE CURATED DATA COREGULATION OF ANDROGEN RECEPTOR ACTIVITY	53	0.368884	0.810815	0.805732	0.97934
POSITIVE REGULATION OF TRANSCRIPTION FROM RNA POLYMERASE II PROMOTER INVOLVED IN CELLULAR RESPONSE TO CHEMICAL STIMULUS GOBP GO:1901522	20	0.433999	0.810755	0.718085	0.978863
MITOCHONDRIAL GENE EXPRESSION WIKIPATHWAYS_20191210 WP391 HOMO SAPIENS	18	0.445192	0.810193	0.720988	0.979431
POSITIVE REGULATION OF LEUKOCYTE MIGRATION GOBP GO:0002687	65	0.362245	0.809758	0.844828	0.979792
DENDRITE MORPHOGENESIS GOBP GO:0048813	29	0.415836	0.809229	0.747875	0.980274
REGULATION OF PROTEIN LOCALIZATION TO MEMBRANE GOBP GO:1905475	130	0.323029	0.80907	0.961723	0.979997
RNA POLYMERASE III TRANSCRIPTION INITIATION FROM TYPE 1 PROMOTER REACTOME R-HSA-76061.2	27	0.41863	0.808898	0.758523	0.979798
SPINAL CORD DEVELOPMENT GOBP GO:0021510	22	0.437241	0.808851	0.720339	0.979303
NEGATIVE REGULATION OF AXON EXTENSION INVOLVED IN AXON GUIDANCE GOBP GO:0048843	15	0.465321	0.808813	0.720102	0.978787
POTASSIUM ION IMPORT ACROSS PLASMA MEMBRANE GOBP GO:1990573	17	0.444354	0.808453	0.731092	0.978911
NEGATIVE REGULATION OF REPRODUCTIVE PROCESS GOBP GO:2000242	15	0.461478	0.807972	0.706037	0.979301
REGULATION OF AXON GUIDANCE GOBP GO:1902667	25	0.421242	0.807932	0.750716	0.978788
PID_AR_PATHWAY MSIGDB_C2 PID_AR_PATHWAY	53	0.368884	0.807929	0.833898	0.978205
REGULATION OF DOUBLE-STRAND BREAK REPAIR GOBP GO:2000779	70	0.353079	0.807877	0.850174	0.977713
RNA PHOSPHODIESTER BOND HYDROLYSIS GOBP GO:0090501	53	0.373959	0.807628	0.825153	0.977579
REGULATION OF CD4-POSITIVE, ALPHA-BETA T CELL ACTIVATION GOBP GO:2000514	31	0.404715	0.807399	0.788618	0.977464
REGULATION OF PHAGOCYTOSIS GOBP GO:0050764	37	0.385758	0.806378	0.777778	0.97891
HEAD AND NECK SQUAMOUS CELL CARCINOMA WIKIPATHWAYS_20191210 WP4674 HOMO SAPIENS	59	0.358083	0.806191	0.855634	0.978713
INTERFERON GAMMA SIGNALING REACTOME R-HSA-877300.1	51	0.370994	0.806103	0.829508	0.978302
CELLULAR GLUCOSE HOMEOSTASIS GOBP GO:0001678	33	0.392038	0.806086	0.78	0.977749
REGULATION OF TRANSCRIPTION REGULATORY REGION DNA BINDING GOBP GO:2000677	30	0.404691	0.806074	0.787565	0.977187
MIRNA REGULATION OF P53 PATHWAY IN PROSTATE CANCER WIKIPATHWAYS_20191210 WP3982 HOMO SAPIENS	22	0.431586	0.806048	0.725857	0.976649
REGULATION OF TOLL-LIKE RECEPTOR SIGNALING PATHWAY GOBP GO:0034121	40	0.392571	0.805571	0.815476	0.976992
TIE1 TEK IOB TIE1 TEK	16	0.442807	0.804719	0.736573	0.978091
CELLULAR RESPONSE TO CARBOHYDRATE STIMULUS GOBP GO:0071322	28	0.40688	0.803775	0.760989	0.979374
HISTONE METHYLATION GOBP GO:0016571	54	0.374952	0.803719	0.802589	0.978898
POSITIVE REGULATION OF T CELL DIFFERENTIATION GOBP GO:0045582	31	0.404664	0.803037	0.768769	0.979629
ENDOTHELIUM DEVELOPMENT GOBP GO:0003158	55	0.36424	0.803016	0.853503	0.979081
REGULATION OF BLOOD CIRCULATION GOBP GO:1903522	121	0.321931	0.802979	0.944954	0.978573
HEPARAN SULFATE HEPARIN (HS-GAG) METABOLISM REACTOME R-HSA-1638091.1	40	0.377499	0.802804	0.817629	0.978349
BIOCARTA_STRESS_PATHWAY MSIGDB_C2 BIOCARTA_STRESS_PATHWAY	23	0.423849	0.802466	0.774611	0.978427
HOMOPHILIC CELL ADHESION VIA PLASMA MEMBRANE ADHESION MOLECULES GOBP GO:0007156	43	0.391972	0.801192	0.827362	0.980401
REGULATION OF HISTONE DEACETYLATION GOBP GO:0031063	16	0.459773	0.801036	0.702413	0.980152
TRANSPORT OF RIBONUCLEOPROTEINS INTO THE HOST NUCLEUS REACTOME R-HSA-168271.3	26	0.413608	0.799841	0.77095	0.98188
REGULATION OF ION TRANSMEMBRANE TRANSPORTER ACTIVITY GOBP GO:0032412	124	0.323894	0.79978	0.930131	0.98141
DICARBOXYLIC ACID TRANSPORT GOBP GO:0006835	33	0.386009	0.798941	0.782477	0.982429
P73 TRANSCRIPTION FACTOR NETWORK PATHWAY INTERACTION DATABASE NCI-NATURE CURATED DATA P73 TRANSCRIPTION FACTOR NETWORK	63	0.3554	0.798632	0.864687	0.982451
CELLULAR RESPONSE TO HEXOSE STIMULUS GOBP GO:0071331	24	0.414345	0.798162	0.757493	0.982753
REGULATION OF CENTROSOME DUPLICATION GOBP GO:0010824	33	0.38567	0.797859	0.799342	0.982752
AMPLIFICATION OF SIGNAL FROM UNATTACHED KINETOCHORES VIA A MAD2 INHIBITORY SIGNAL REACTOME R-HSA-141444.2	91	0.335737	0.797754	0.910853	0.982396
PID_PI3KCI_PATHWAY MSIGDB_C2 PID_PI3KCI_PATHWAY	34	0.389963	0.797605	0.784024	0.982102
DNA STRAND ELONGATION INVOLVED IN DNA REPLICATION GOBP GO:0006271	21	0.43165	0.79756	0.738342	0.981611
NEGATIVE REGULATION OF ALPHA-BETA T CELL ACTIVATION GOBP GO:0046636	21	0.436262	0.796468	0.724409	0.983076
HALLMARK_WNT_BETA_CATENIN_SIGNALING MSIGDB_C2 HALLMARK_WNT_BETA_CATENIN_SIGNALING	37	0.384263	0.796134	0.807453	0.983156
PROTEIN TARGETING TO LYSOSOME GOBP GO:0006622	18	0.435364	0.795004	0.766917	0.98464
CARDIAC SEPTUM MORPHOGENESIS GOBP GO:0060411	33	0.386369	0.794637	0.816024	0.984755
REGULATION OF CARDIAC MUSCLE CELL DIFFERENTIATION GOBP GO:2000725	15	0.459104	0.794448	0.762667	0.984521
TRANSMISSION ACROSS CHEMICAL SYNAPSES REACTOME R-HSA-112315.5	136	0.318587	0.793488	0.972527	0.985796
MEIOTIC SYNAPSIS REACTOME DATABASE ID RELEASE 71 1221632	30	0.396694	0.79325	0.762195	0.985645
REGULATION OF DNA RECOMBINATION GOBP GO:0000018	66	0.349587	0.792487	0.889262	0.986459
CELLULAR RESPONSE TO VASCULAR ENDOTHELIAL GROWTH FACTOR STIMULUS GOBP GO:0035924	32	0.388002	0.792225	0.798137	0.986384
REGULATION OF PROTEIN ACETYLATION GOBP GO:1901983	50	0.3629	0.791997	0.861017	0.986186
LEUKOCYTE DIFFERENTIATION GOBP GO:0002521	117	0.320816	0.791706	0.984436	0.986155
AMPLIFICATION OF SIGNAL FROM THE KINETOCHORES REACTOME R-HSA-141424.2	91	0.335737	0.791581	0.922449	0.985804
NEGATIVE REGULATION OF TUMOR NECROSIS FACTOR SUPERFAMILY CYTOKINE PRODUCTION GOBP GO:1903556	22	0.39987	0.791149	0.760926	0.986012
CELLULAR RESPONSE TO MONOSACCHARIDE STIMULUS GOBP GO:0071326	24	0.414345	0.790747	0.767263	0.986122
PID_ALK1_PATHWAY MSIGDB_C2 PID_ALK1_PATHWAY	24	0.407239	0.790436	0.787611	0.986126
POSITIVE REGULATION OF PHOSPHOLIPASE ACTIVITY GOBP GO:0010518	32	0.392589	0.790098	0.805882	0.986181
POSITIVE REGULATION OF AXON EXTENSION GOBP GO:0045773	19	0.429705	0.790064	0.751337	0.985666
NEGATIVE REGULATION OF NUCLEAR DIVISION GOBP GO:0051784	33	0.393208	0.789405	0.795455	0.986258
PID_P73PATHWAY MSIGDB_C2 PID_P73PATHWAY	63	0.3554	0.789368	0.878788	0.98575
INTERLEUKIN SIGNALING PATHWAY PANTHER PATHWAY P00036	60	0.341012	0.788903	0.870861	0.986059
REGULATION OF AXON EXTENSION INVOLVED IN AXON GUIDANCE GOBP GO:0048841	18	0.428758	0.788856	0.765499	0.985573
REGULATION OF DENDRITIC SPINE MORPHOGENESIS GOBP GO:0061001	23	0.415991	0.788506	0.793282	0.985677
OUTFLOW TRACT SEPTUM MORPHOGENESIS GOBP GO:0003148	18	0.436042	0.788032	0.755747	0.985953
POSITIVE REGULATION OF CELL DIVISION GOBP GO:0051781	31	0.388902	0.787618	0.807692	0.986104
BASE-EXCISION REPAIR GOBP GO:0006284	35	0.374692	0.787321	0.838906	0.986075
BIOCARTA_CHREBP2_PATHWAY MSIGDB_C2 BIOCARTA_CHREBP2_PATHWAY	37	0.376104	0.786625	0.818991	0.98677
POSITIVE REGULATION OF SMALL MOLECULE METABOLIC PROCESS GOBP GO:0062013	77	0.34376	0.786426	0.901408	0.98656
MYELINATION GOBP GO:0042552	42	0.365073	0.78616	0.849112	0.986454
POSITIVE REGULATION OF CATION CHANNEL ACTIVITY GOBP GO:2001259	29	0.395692	0.786008	0.797753	0.986162
B CELL ACTIVATION GOBP GO:0042113	57	0.349012	0.785436	0.885135	0.9866
BIOCARTA_CERAMIDE_PATHWAY MSIGDB_C2 BIOCARTA_CERAMIDE_PATHWAY	22	0.419931	0.785333	0.766234	0.986198
BETA-CATENIN DESTRUCTION COMPLEX DISASSEMBLY GOBP GO:1904886	16	0.435332	0.784587	0.727513	0.986944
MITOCHONDRIAL LC-FATTY ACID BETA-OXIDATION WIKIPATHWAYS_20191210 WP368 HOMO SAPIENS	17	0.431799	0.783465	0.763926	0.9884
MHC CLASS II ANTIGEN PRESENTATION REACTOME DATABASE ID RELEASE 71 2132295	86	0.325008	0.783443	0.92511	0.987878
BIOCARTA_TID_PATHWAY MSIGDB_C2 BIOCARTA_TID_PATHWAY	16	0.455632	0.783257	0.75	0.987633
STEROL REGULATORY ELEMENT-BINDING PROTEINS (SREBP) SIGNALLING WIKIPATHWAYS_20191210 WP1982 HOMO SAPIENS	62	0.347291	0.782948	0.927273	0.987624
CERAMIDE BIOSYNTHETIC PROCESS GOBP GO:0046513	26	0.406098	0.782909	0.788044	0.987119
POSITIVE REGULATION OF CELL KILLING GOBP GO:0031343	15	0.445238	0.782319	0.761905	0.987565
LONG-CHAIN FATTY ACID TRANSPORT GOBP GO:0015909	23	0.416232	0.782053	0.805405	0.987445
AXON EXTENSION GOBP GO:0048675	20	0.426619	0.782002	0.765217	0.986964
SMAD PROTEIN SIGNAL TRANSDUCTION GOBP GO:0060395	28	0.396943	0.781801	0.783862	0.986719
ATP-DEPENDENT CHROMATIN REMODELING GOBP GO:0043044	67	0.346326	0.781693	0.880137	0.986348
NEGATIVE REGULATION OF MITOTIC NUCLEAR DIVISION GOBP GO:0045839	31	0.395577	0.781602	0.817901	0.985933
D-<I>MYO< I>-INOSITOL (1,3,4)-TRISPHOSPHATE BIOSYNTHESIS HUMANCYC PWY-6364	15	0.445613	0.781024	0.77	0.986426
L-ALPHA-AMINO ACID TRANSMEMBRANE TRANSPORT GOBP GO:1902475	18	0.429293	0.780843	0.785185	0.986163
RECEPTOR METABOLIC PROCESS GOBP GO:0043112	60	0.348494	0.780217	0.871429	0.986722
ENSHEATHMENT OF NEURONS GOBP GO:0007272	44	0.362507	0.780195	0.830247	0.986204
NEGATIVE REGULATION OF CD4-POSITIVE, ALPHA-BETA T CELL ACTIVATION GOBP GO:2000515	17	0.438201	0.780122	0.763224	0.985767
L-AMINO ACID TRANSPORT GOBP GO:0015807	25	0.405472	0.779605	0.783333	0.986077
HEDGEHOG SIGNALING PATHWAY PANTHER PATHWAY P00025	16	0.425942	0.779573	0.771053	0.985576
REGULATION OF TOR SIGNALING GOBP GO:0032006	81	0.332957	0.779567	0.947581	0.985024
ALK1 SIGNALING EVENTS PATHWAY INTERACTION DATABASE NCI-NATURE CURATED DATA ALK1 SIGNALING EVENTS	24	0.40724	0.779277	0.811671	0.984969
PHOTODYNAMIC THERAPY-INDUCED NF-KB SURVIVAL SIGNALING WIKIPATHWAYS_20191210 WP3617 HOMO SAPIENS	23	0.412311	0.779268	0.801061	0.984416
RNA POLYMERASE I PROMOTER ESCAPE REACTOME DATABASE ID RELEASE 71 73772	37	0.385117	0.779083	0.798013	0.984161
MEMBRANE INVAGINATION GOBP GO:0010324	33	0.379505	0.778963	0.824561	0.983815
DORSAL/VENTRAL PATTERN FORMATION GOBP GO:0009953	16	0.441871	0.778491	0.762353	0.984051
REGULATION OF HEART GROWTH GOBP GO:0060420	20	0.419033	0.778208	0.770833	0.983974
POSITIVE REGULATION OF TELOMERE MAINTENANCE GOBP GO:0032206	46	0.364777	0.778021	0.863777	0.983722
PHOSPHATIDYLINOSITOL PHOSPHORYLATION GOBP GO:0046854	31	0.395893	0.777916	0.794595	0.983336
GASTRIC CANCER NETWORK 1 WIKIPATHWAYS_20191210 WP2361 HOMO SAPIENS	23	0.408993	0.775879	0.784946	0.98625
CELLULAR PROTEIN-CONTAINING COMPLEX LOCALIZATION GOBP GO:0034629	19	0.430405	0.775777	0.789474	0.985859
CHOLESTEROL METABOLIC PROCESS GOBP GO:0008203	50	0.353324	0.775647	0.880399	0.985504
GLYCEROPHOSPHOLIPID BIOSYNTHESIS REACTOME DATABASE ID RELEASE 71 1483206	96	0.324557	0.774937	0.951311	0.986137
ESTROGEN SIGNALING PATHWAY WIKIPATHWAYS_20191210 WP712 HOMO SAPIENS	21	0.418888	0.774708	0.766382	0.985964
RESPONSE TO MONOSACCHARIDE GOBP GO:0034284	38	0.368309	0.774218	0.827778	0.986211
MYELOID LEUKOCYTE DIFFERENTIATION GOBP GO:0002573	49	0.351184	0.773782	0.869565	0.986382
METHYLATION GOBP GO:0032259	169	0.301232	0.772076	0.988889	0.988624
CHROMOSOME SEGREGATION GOBP GO:0007059	192	0.293282	0.770941	1	0.989913
ESTABLISHMENT OF ENDOTHELIAL BARRIER GOBP GO:0061028	25	0.404693	0.770721	0.808219	0.989745
ERBB SIGNALING PATHWAY WIKIPATHWAYS_20191210 WP673 HOMO SAPIENS	75	0.330303	0.770304	0.945946	0.989857
POSITIVE REGULATION OF PATHWAY-RESTRICTED SMAD PROTEIN PHOSPHORYLATION GOBP GO:0010862	29	0.388621	0.770298	0.795977	0.989305
PURINE NUCLEOSIDE DIPHOSPHATE METABOLIC PROCESS GOBP GO:0009135	34	0.382249	0.769234	0.834734	0.990498
EPHA2 FORWARD SIGNALING PATHWAY INTERACTION DATABASE NCI-NATURE CURATED DATA EPHA2 FORWARD SIGNALING	18	0.422369	0.768881	0.818878	0.990488
REGULATORY CIRCUITS OF THE STAT3 SIGNALING PATHWAY WIKIPATHWAYS_20191210 WP4538 HOMO SAPIENS	58	0.35035	0.768399	0.891525	0.990718
IFN-GAMMA PATHWAY PATHWAY INTERACTION DATABASE NCI-NATURE CURATED DATA IFN-GAMMA PATHWAY	38	0.36719	0.768286	0.867647	0.990326
PID_HIV_NEF_PATHWAY MSIGDB_C2 PID_HIV_NEF_PATHWAY	30	0.377885	0.767292	0.82659	0.991325
POSITIVE REGULATION OF ORGAN GROWTH GOBP GO:0046622	15	0.432005	0.767064	0.806971	0.991093
G-CSF IOB G-CSF	34	0.371632	0.766277	0.846591	0.991781
REGULATION OF ACUTE INFLAMMATORY RESPONSE GOBP GO:0002673	36	0.367853	0.766263	0.846875	0.99125
ENDOTHELIAL CELL DIFFERENTIATION GOBP GO:0045446	47	0.35452	0.765235	0.885802	0.992317
REGULATION OF VASOCONSTRICTION GOBP GO:0019229	18	0.419513	0.765068	0.79902	0.992016
AXON ENSHEATHMENT GOBP GO:0008366	44	0.362507	0.764768	0.856164	0.991942
DNA STRAND ELONGATION GOBP GO:0022616	25	0.395072	0.763923	0.799465	0.992704
BIOCARTA_ECM_PATHWAY MSIGDB_C2 BIOCARTA_ECM_PATHWAY	22	0.402336	0.763892	0.830688	0.992202
PIGMENT GRANULE LOCALIZATION GOBP GO:0051875	20	0.404939	0.763599	0.837912	0.992072
RESPONSE TO CHEMOKINE GOBP GO:1990868	20	0.417422	0.762847	0.794595	0.99267
G2 DNA DAMAGE CHECKPOINT GOBP GO:0031572	27	0.389921	0.762558	0.847059	0.992589
PROTEIN METHYLATION GOBP GO:0006479	80	0.321771	0.762378	0.972656	0.992303
POSITIVE REGULATION OF HEART GROWTH GOBP GO:0060421	15	0.432005	0.761542	0.783784	0.992993
NEGATIVE REGULATION OF TUMOR NECROSIS FACTOR PRODUCTION GOBP GO:0032720	21	0.415912	0.760777	0.805333	0.993623
POSITIVE REGULATION OF PRI-MIRNA TRANSCRIPTION BY RNA POLYMERASE II GOBP GO:1902895	23	0.401004	0.75997	0.785714	0.994255
ROOF OF MOUTH DEVELOPMENT GOBP GO:0060021	25	0.404838	0.759917	0.810667	0.993775
IMPORT ACROSS PLASMA MEMBRANE GOBP GO:0098739	45	0.357974	0.759596	0.872781	0.993701
MEIOSIS REACTOME DATABASE ID RELEASE 71 1500620	53	0.347913	0.758915	0.916968	0.994145
POSITIVE REGULATION OF NEURON DEATH GOBP GO:1901216	34	0.375391	0.758897	0.866071	0.993609
POSITIVE REGULATION OF PROTEIN AUTOPHOSPHORYLATION GOBP GO:0031954	19	0.420674	0.758318	0.825193	0.993947
CELLULAR RESPONSE TO CHEMOKINE GOBP GO:1990869	20	0.417422	0.758203	0.817927	0.99357
BIOCARTA_IL2RB_PATHWAY MSIGDB_C2 BIOCARTA_IL2RB_PATHWAY	29	0.38843	0.757892	0.832402	0.993461
ANION HOMEOSTASIS GOBP GO:0055081	29	0.381948	0.75786	0.853994	0.992961
REGULATION OF TELOMERASE ACTIVITY GOBP GO:0051972	45	0.35384	0.757471	0.875399	0.992993
HIPPO SIGNALING GOBP GO:0035329	26	0.391098	0.756876	0.816156	0.993314
LOCOMOTORY BEHAVIOR GOBP GO:0007626	28	0.379931	0.756384	0.826211	0.993523
NCRNA TRANSCRIPTION GOBP GO:0098781	90	0.309801	0.756149	0.981203	0.993331
PLASMA MEMBRANE INVAGINATION GOBP GO:0099024	27	0.395373	0.755984	0.833811	0.993011
RESPONSE TO CARBOHYDRATE GOBP GO:0009743	45	0.354372	0.755548	0.875433	0.993099
POSITIVE REGULATION OF MRNA METABOLIC PROCESS GOBP GO:1903313	58	0.335564	0.755045	0.922034	0.993291
COLUMNAR/CUBOIDAL EPITHELIAL CELL DIFFERENTIATION GOBP GO:0002065	18	0.414904	0.754859	0.813433	0.993019
LIPID TRANSLOCATION GOBP GO:0034204	21	0.398741	0.754694	0.79597	0.992726
TRNA CHARGING HUMANCYC TRNA-CHARGING-PWY	37	0.364199	0.753938	0.859702	0.993266
MITOTIC SISTER CHROMATID SEGREGATION GOBP GO:0000070	94	0.31747	0.7523	0.982143	0.995024
PIGMENT CELL DIFFERENTIATION GOBP GO:0050931	17	0.419806	0.751918	0.801075	0.995003
ORGANELLE FISSION GOBP GO:0048285	208	0.283562	0.751634	0.99422	0.994856
PROTEIN ALKYLATION GOBP GO:0008213	80	0.321771	0.751435	0.968	0.994608
ENDOTHELIAL CELL DEVELOPMENT GOBP GO:0001885	29	0.38194	0.751326	0.854651	0.994216
TNFSF8 IOB TNFSF8	18	0.40037	0.751218	0.818878	0.993828
BIOCARTA_BCR_PATHWAY MSIGDB_C2 BIOCARTA_BCR_PATHWAY	27	0.386342	0.750744	0.843077	0.993952
PYRIMIDINE METABOLISM WIKIPATHWAYS_20191210 WP4022 HOMO SAPIENS	74	0.327407	0.750708	0.947154	0.993455
REGULATION OF STEROL BIOSYNTHETIC PROCESS GOBP GO:0106118	40	0.345302	0.750623	0.911932	0.993033
PROTEIN LOCALIZATION TO SYNAPSE GOBP GO:0035418	20	0.405823	0.750428	0.809045	0.992757
PID_IGF1_PATHWAY MSIGDB_C2 PID_IGF1_PATHWAY	27	0.380434	0.748853	0.86911	0.994432
CIRCADIAN RHYTHM PATHWAY PATHWAY INTERACTION DATABASE NCI-NATURE CURATED DATA CIRCADIAN RHYTHM PATHWAY	15	0.423347	0.748526	0.769976	0.994346
REGULATION OF CALCIUM ION IMPORT GOBP GO:0090279	15	0.425031	0.748277	0.790281	0.994154
ADULT BEHAVIOR GOBP GO:0030534	19	0.415945	0.747951	0.82732	0.994044
HISTONE H3 ACETYLATION GOBP GO:0043966	38	0.363746	0.747806	0.900585	0.993687
PIGMENT GRANULE TRANSPORT GOBP GO:0051904	17	0.410414	0.747244	0.814621	0.993901
BIOCARTA_TFF_PATHWAY MSIGDB_C2 BIOCARTA_TFF_PATHWAY	19	0.412811	0.746545	0.821705	0.994338
MICROTUBULE-BASED TRANSPORT GOBP GO:0099111	115	0.306122	0.746171	0.987755	0.994292
CALCIUM ION TRANSMEMBRANE IMPORT INTO CYTOSOL GOBP GO:0097553	34	0.372333	0.746103	0.850153	0.993841
IL8- AND CXCR1-MEDIATED SIGNALING EVENTS PATHWAY INTERACTION DATABASE NCI-NATURE CURATED DATA IL8- AND CXCR1-MEDIATED SIGNALING EVENTS	19	0.39619	0.744206	0.839793	0.995846
TRANSPORT ALONG MICROTUBULE GOBP GO:0010970	115	0.306122	0.744198	0.995122	0.995319
THYMIC STROMAL LYMPHOPOIETIN (TSLP) SIGNALING PATHWAY WIKIPATHWAYS_20191210 WP2203 HOMO SAPIENS	37	0.359377	0.744196	0.900901	0.994776
REGULATION OF INTERFERON-GAMMA PRODUCTION GOBP GO:0032649	41	0.356299	0.744171	0.904025	0.994269
IGF1 PATHWAY PATHWAY INTERACTION DATABASE NCI-NATURE CURATED DATA IGF1 PATHWAY	27	0.380434	0.74386	0.882698	0.99412
MELANOSOME TRANSPORT GOBP GO:0032402	17	0.410414	0.743709	0.813411	0.993795
PID_MYC_PATHWAY MSIGDB_C2 PID_MYC_PATHWAY	23	0.389533	0.743381	0.830645	0.993705
POSITIVE REGULATION OF ION TRANSMEMBRANE TRANSPORT GOBP GO:0034767	63	0.332758	0.743309	0.944649	0.993262
PID_EPHA2_FWD_PATHWAY MSIGDB_C2 PID_EPHA2_FWD_PATHWAY	18	0.422369	0.743168	0.841226	0.992904
ESTABLISHMENT OF MELANOSOME LOCALIZATION GOBP GO:0032401	18	0.410395	0.742041	0.816438	0.993866
TNF RECEPTOR SIGNALING PATHWAY PATHWAY INTERACTION DATABASE NCI-NATURE CURATED DATA TNF RECEPTOR SIGNALING PATHWAY	40	0.352582	0.741891	0.909375	0.993522
IL-7 SIGNALING PATHWAY WIKIPATHWAYS_20191210 WP205 HOMO SAPIENS	20	0.408716	0.741848	0.838624	0.993038
PHOSPHATIDYLETHANOLAMINE METABOLIC PROCESS GOBP GO:0046337	16	0.410856	0.741753	0.829457	0.992616
PID_IL8_CXCR1_PATHWAY MSIGDB_C2 PID_IL8_CXCR1_PATHWAY	19	0.39619	0.741554	0.831135	0.992323
PID_TNF_PATHWAY MSIGDB_C2 PID_TNF_PATHWAY	41	0.351015	0.741487	0.920354	0.991879
C-MYC PATHWAY PATHWAY INTERACTION DATABASE NCI-NATURE CURATED DATA C-MYC PATHWAY	24	0.389472	0.741305	0.816092	0.99157
REGULATION OF INTERFERON-BETA PRODUCTION GOBP GO:0032648	35	0.362014	0.741003	0.904478	0.99141
DNA IR-DAMAGE AND CELLULAR RESPONSE VIA ATR WIKIPATHWAYS_20191210 WP4016 HOMO SAPIENS	79	0.317151	0.740856	0.972332	0.991075
PID_CIRCADIAN_PATHWAY MSIGDB_C2 PID_CIRCADIAN_PATHWAY	15	0.423347	0.740182	0.821782	0.99139
ESTABLISHMENT OF PIGMENT GRANULE LOCALIZATION GOBP GO:0051905	18	0.410395	0.740081	0.85567	0.990981
TGF-BETA SIGNALING PATHWAY PANTHER PATHWAY P00052	69	0.321251	0.740061	0.969811	0.990473
CYTOSOLIC TRNA AMINOACYLATION REACTOME R-HSA-379716.1	24	0.38267	0.739943	0.852368	0.990086
RESPONSE TO HEXOSE GOBP GO:0009746	38	0.368309	0.739868	0.89881	0.989648
EICOSANOID METABOLISM VIA CYCLO OXYGENASES (COX) WIKIPATHWAYS_20191210 WP4719 HOMO SAPIENS	22	0.391719	0.73946	0.838046	0.989626
PID_THROMBIN_PAR1_PATHWAY MSIGDB_C2 PID_THROMBIN_PAR1_PATHWAY	35	0.358294	0.739422	0.870091	0.989142
REGULATION OF T CELL DIFFERENTIATION GOBP GO:0045580	57	0.337937	0.739389	0.91603	0.988644
MELANOSOME LOCALIZATION GOBP GO:0032400	20	0.404939	0.739017	0.796748	0.988582
BIOCARTA_VIP_PATHWAY MSIGDB_C2 BIOCARTA_VIP_PATHWAY	21	0.402431	0.738968	0.819407	0.988108
RNA POLYMERASE II TRANSCRIBES SNRNA GENES REACTOME R-HSA-6807505.2	75	0.315056	0.738709	0.97551	0.987912
PID_NFAT_TFPATHWAY MSIGDB_C2 PID_NFAT_TFPATHWAY	27	0.376599	0.737831	0.863222	0.988487
POSITIVE REGULATION OF PEPTIDE HORMONE SECRETION GOBP GO:0090277	27	0.377836	0.737754	0.857143	0.988052
COLLAGEN FIBRIL ORGANIZATION GOBP GO:0030199	26	0.388349	0.737389	0.848024	0.987954
NEGATIVE REGULATION OF GENE EXPRESSION, EPIGENETIC GOBP GO:0045814	62	0.323833	0.736463	0.969072	0.988626
RESISTIN AS A REGULATOR OF INFLAMMATION WIKIPATHWAYS_20191210 WP4481 HOMO SAPIENS	27	0.374535	0.735261	0.870206	0.989714
NEGATIVE REGULATION OF INTERFERON-GAMMA PRODUCTION GOBP GO:0032689	16	0.414984	0.734993	0.825641	0.989488
ESTABLISHMENT OF PROTEIN LOCALIZATION TO VACUOLE GOBP GO:0072666	36	0.358656	0.733994	0.86747	0.990159
RHO GTPASES ACTIVATE PKNS REACTOME DATABASE ID RELEASE 71 5625740	37	0.348957	0.732649	0.902367	0.991274
SYNTHESIS OF VERY LONG-CHAIN FATTY ACYL-COAS REACTOME R-HSA-75876.5	17	0.406935	0.732182	0.826425	0.99128
PID_TGFBR_PATHWAY MSIGDB_C2 PID_TGFBR_PATHWAY	53	0.329335	0.731713	0.951613	0.991322
PRODUCTION OF MOLECULAR MEDIATOR OF IMMUNE RESPONSE GOBP GO:0002440	30	0.369972	0.731698	0.885542	0.990809
BDNF IOB BDNF	41	0.350289	0.731007	0.928783	0.991136
IL3-MEDIATED SIGNALING EVENTS PATHWAY INTERACTION DATABASE NCI-NATURE CURATED DATA IL3-MEDIATED SIGNALING EVENTS	19	0.405554	0.730672	0.849351	0.991011
REGULATION OF PRI-MIRNA TRANSCRIPTION BY RNA POLYMERASE II GOBP GO:1902893	31	0.367044	0.730225	0.886792	0.991019
P53 PATHWAY FEEDBACK LOOPS 2 PANTHER PATHWAY P04398	36	0.345235	0.730104	0.929775	0.990641
SNRNA TRANSCRIPTION GOBP GO:0009301	72	0.315454	0.72791	0.977695	0.992709
PHASE II - CONJUGATION OF COMPOUNDS REACTOME R-HSA-156580.2	50	0.330744	0.727704	0.949045	0.992405
REGULATION OF STRIATED MUSCLE CONTRACTION GOBP GO:0006942	43	0.34624	0.727457	0.933121	0.992164
PAR1-MEDIATED THROMBIN SIGNALING EVENTS PATHWAY INTERACTION DATABASE NCI-NATURE CURATED DATA PAR1-MEDIATED THROMBIN SIGNALING EVENTS	35	0.358294	0.726796	0.897436	0.992348
CELLULAR BIOGENIC AMINE METABOLIC PROCESS GOBP GO:0006576	30	0.354588	0.726552	0.902857	0.992088
PHAGOCYTOSIS, ENGULFMENT GOBP GO:0006911	19	0.389809	0.726171	0.830137	0.991996
PHOSPHOLIPID TRANSLOCATION GOBP GO:0045332	19	0.405659	0.725545	0.851459	0.992192
PID_IL3_PATHWAY MSIGDB_C2 PID_IL3_PATHWAY	20	0.400733	0.725494	0.868421	0.991728
REGULATION OF FATTY ACID OXIDATION GOBP GO:0046320	17	0.404738	0.725303	0.821159	0.991411
REGULATION OF HISTONE MODIFICATION GOBP GO:0031056	104	0.297721	0.725166	0.996169	0.991028
NEPHRIN NEPH1 SIGNALING IN THE KIDNEY PODOCYTE PATHWAY INTERACTION DATABASE NCI-NATURE CURATED DATA NEPHRIN NEPH1 SIGNALING IN THE KIDNEY PODOCYTE	25	0.369079	0.724891	0.873278	0.990848
REGULATION OF CELL DIVISION GOBP GO:0051302	84	0.311271	0.724767	0.988764	0.990466
GLYCEROLIPID CATABOLIC PROCESS GOBP GO:0046503	27	0.369505	0.723833	0.891599	0.991016
RHO GTPASES ACTIVATE FORMINS REACTOME DATABASE ID RELEASE 71 5663220	115	0.295569	0.721893	0.995392	0.992647
ESTABLISHMENT OR MAINTENANCE OF CYTOSKELETON POLARITY GOBP GO:0030952	18	0.396223	0.721715	0.844737	0.992307
BIOCARTA_BIOPEPTIDES_PATHWAY MSIGDB_C2 BIOCARTA_BIOPEPTIDES_PATHWAY	32	0.360763	0.721246	0.891239	0.992289
PHOSPHOLIPASES HUMANCYC LIPASYN-PWY	22	0.38516	0.721061	0.868946	0.991954
PID_VEGFR1_PATHWAY MSIGDB_C2 PID_VEGFR1_PATHWAY	24	0.370583	0.720732	0.880893	0.991802
SIGNALING BY HIPPO REACTOME DATABASE ID RELEASE 71 2028269	19	0.394591	0.720309	0.86802	0.991738
POSITIVE REGULATION OF PURINE NUCLEOTIDE METABOLIC PROCESS GOBP GO:1900544	29	0.361428	0.720176	0.88724	0.99135
PHOTODYNAMIC THERAPY-INDUCED HIF-1 SURVIVAL SIGNALING WIKIPATHWAYS_20191210 WP3614 HOMO SAPIENS	33	0.3447	0.719738	0.90379	0.991303
PID_BMP_PATHWAY MSIGDB_C2 PID_BMP_PATHWAY	37	0.348926	0.718661	0.929448	0.991936
REGULATION OF GLYCOLYTIC PROCESS GOBP GO:0006110	56	0.314272	0.716549	0.975265	0.993704
CYTOPLASMIC MICROTUBULE ORGANIZATION GOBP GO:0031122	43	0.335877	0.716283	0.932353	0.993465
REGULATION OF TRANSCRIPTION BY RNA POLYMERASE III GOBP GO:0006359	20	0.391847	0.715768	0.864722	0.99348
AMINO ACID TRANSMEMBRANE TRANSPORT GOBP GO:0003333	31	0.359607	0.715691	0.92068	0.993028
RECEPTOR INTERNALIZATION GOBP GO:0031623	33	0.356527	0.715312	0.902778	0.992913
CELLULAR PIGMENTATION GOBP GO:0033059	41	0.340503	0.715271	0.937705	0.992432
PLASMA MEMBRANE ORGANIZATION GOBP GO:0007009	52	0.318293	0.714431	0.979798	0.992802
INSULIN IGF PATHWAY-MITOGEN ACTIVATED PROTEIN KINASE KINASE MAP KINASE CASCADE PANTHER PATHWAY P00032	25	0.371376	0.714294	0.893733	0.992411
SNRNA TRANSCRIPTION BY RNA POLYMERASE II GOBP GO:0042795	71	0.315486	0.71287	0.976974	0.993355
GAP JUNCTION TRAFFICKING AND REGULATION REACTOME R-HSA-157858.1	20	0.385755	0.71195	0.860892	0.993763
POSITIVE REGULATION OF ATP METABOLIC PROCESS GOBP GO:1903580	29	0.361428	0.71174	0.9	0.993451
HALLMARK_TGF_BETA_SIGNALING MSIGDB_C2 HALLMARK_TGF_BETA_SIGNALING	51	0.331706	0.711541	0.944272	0.993144
HOST INTERACTIONS WITH INFLUENZA FACTORS REACTOME R-HSA-168253.4	36	0.343572	0.711358	0.924699	0.9928
REGULATION OF CHOLESTEROL BIOSYNTHETIC PROCESS GOBP GO:0045540	40	0.345302	0.711311	0.914894	0.992325
BMP RECEPTOR SIGNALING PATHWAY INTERACTION DATABASE NCI-NATURE CURATED DATA BMP RECEPTOR SIGNALING	37	0.348926	0.710552	0.944272	0.992564
POSITIVE REGULATION OF NUCLEOTIDE METABOLIC PROCESS GOBP GO:0045981	29	0.361428	0.709916	0.907609	0.992682
BIOCARTA_P53_PATHWAY MSIGDB_C2 BIOCARTA_P53_PATHWAY	16	0.401773	0.709833	0.854167	0.992248
REGULATION OF HISTONE METHYLATION GOBP GO:0031060	51	0.326712	0.709343	0.957516	0.992231
CELLULAR AMINE METABOLIC PROCESS GOBP GO:0044106	30	0.354588	0.709284	0.895184	0.991772
FATTY ACYL-COA BIOSYNTHESIS REACTOME R-HSA-75105.6	28	0.369229	0.709253	0.87931	0.991279
CILIUM MOVEMENT GOBP GO:0003341	30	0.347359	0.708276	0.904632	0.991697
RAF ACTIVATION REACTOME R-HSA-5673000.2	27	0.359942	0.707771	0.911357	0.991674
CANONICAL NF-KAPPAB PATHWAY PATHWAY INTERACTION DATABASE NCI-NATURE CURATED DATA CANONICAL NF-KAPPAB PATHWAY	22	0.375388	0.707603	0.892655	0.99133
POSITIVE REGULATION OF INTERFERON-BETA PRODUCTION GOBP GO:0032728	23	0.375702	0.707395	0.881443	0.991022
MITOTIC NUCLEAR DIVISION GOBP GO:0140014	126	0.281936	0.707248	1	0.990655
BIOCARTA_RELA_PATHWAY MSIGDB_C2 BIOCARTA_RELA_PATHWAY	15	0.403399	0.706942	0.83727	0.990423
MACROMOLECULE METHYLATION GOBP GO:0043414	157	0.276944	0.706011	1	0.99077
POSITIVE REGULATION OF CALCIUM ION TRANSPORT GOBP GO:0051928	47	0.322613	0.703993	0.967213	0.992135
INITIATION OF TRANSCRIPTION AND TRANSLATION ELONGATION AT THE HIV-1 LTR WIKIPATHWAYS_20191210 WP3414 HOMO SAPIENS	31	0.353643	0.703351	0.883077	0.992234
REGULATION OF TRANSCRIPTION INVOLVED IN G1/S TRANSITION OF MITOTIC CELL CYCLE GOBP GO:0000083	23	0.375092	0.702616	0.870787	0.99238
REGULATION OF PHOSPHOLIPID METABOLIC PROCESS GOBP GO:1903725	48	0.321016	0.700643	0.977419	0.993697
FERROPTOSIS WIKIPATHWAYS_20191210 WP4313 HOMO SAPIENS	32	0.347192	0.700205	0.920588	0.993591
VASCULOGENESIS GOBP GO:0001570	22	0.366784	0.699501	0.893064	0.993738
GAP JUNCTION TRAFFICKING REACTOME DATABASE ID RELEASE 71 190828	19	0.38672	0.699069	0.896458	0.993605
SOMATIC DIVERSIFICATION OF IMMUNE RECEPTORS VIA GERMLINE RECOMBINATION WITHIN A SINGLE LOCUS GOBP GO:0002562	17	0.392694	0.698858	0.898172	0.993269
EXPORT ACROSS PLASMA MEMBRANE GOBP GO:0140115	17	0.371815	0.6985	0.908377	0.993072
TRANSCRIPTION REGULATION BY BZIP TRANSCRIPTION FACTOR PANTHER PATHWAY P00055	44	0.329326	0.697831	0.954693	0.993153
REGULATION OF GLUCONEOGENESIS GOBP GO:0006111	25	0.366523	0.697137	0.916185	0.993265
SOMATIC CELL DNA RECOMBINATION GOBP GO:0016444	17	0.392694	0.696077	0.891304	0.993702
LONG-TERM SYNAPTIC POTENTIATION GOBP GO:0060291	16	0.392273	0.695666	0.871212	0.993567
BIOCARTA_PYK2_PATHWAY MSIGDB_C2 BIOCARTA_PYK2_PATHWAY	26	0.359556	0.695032	0.922636	0.993629
REGULATION OF PLATELET-DERIVED GROWTH FACTOR RECEPTOR SIGNALING PATHWAY GOBP GO:0010640	15	0.393753	0.694629	0.89196	0.993459
CELLULAR RESPONSE TO ARSENIC-CONTAINING SUBSTANCE GOBP GO:0071243	17	0.387269	0.694235	0.89313	0.993299
SEROTONIN RECEPTOR 4/6/7 AND NR3C SIGNALING WIKIPATHWAYS_20191210 WP734 HOMO SAPIENS	16	0.396234	0.692597	0.853659	0.994192
POSITIVE REGULATION OF MONOOXYGENASE ACTIVITY GOBP GO:0032770	17	0.39261	0.692573	0.878238	0.993697
REGULATION OF KERATINOCYTE PROLIFERATION GOBP GO:0010837	18	0.374738	0.692	0.890625	0.993692
DEOXYRIBOSE PHOSPHATE CATABOLIC PROCESS GOBP GO:0046386	15	0.392156	0.691515	0.872773	0.993585
ADAPTIVE IMMUNE RESPONSE BASED ON SOMATIC RECOMBINATION OF IMMUNE RECEPTORS BUILT FROM IMMUNOGLOBULIN SUPERFAMILY DOMAINS GOBP GO:0002460	32	0.341825	0.691227	0.94051	0.993295
ODONTOGENESIS OF DENTIN-CONTAINING TOOTH GOBP GO:0042475	17	0.396937	0.689331	0.896135	0.994321
SA_TRKA_RECEPTOR MSIGDB_C2 SA_TRKA_RECEPTOR	15	0.393273	0.68848	0.892308	0.994464
HISTONE H3-K4 METHYLATION GOBP GO:0051568	24	0.363003	0.687612	0.902299	0.99461
VALIDATED NUCLEAR ESTROGEN RECEPTOR ALPHA NETWORK PATHWAY INTERACTION DATABASE NCI-NATURE CURATED DATA VALIDATED NUCLEAR ESTROGEN RECEPTOR ALPHA NETWORK	53	0.310601	0.68697	0.979661	0.994582
GOLGI TO VACUOLE TRANSPORT GOBP GO:0006896	15	0.396227	0.685998	0.89295	0.994858
VISUAL PERCEPTION GOBP GO:0007601	47	0.317139	0.682595	0.975	0.997021
ZINC HOMEOSTASIS WIKIPATHWAYS_20191210 WP3529 HOMO SAPIENS	18	0.370118	0.682434	0.871465	0.996618
REGULATION OF NUCLEOTIDE CATABOLIC PROCESS GOBP GO:0030811	56	0.314272	0.682111	0.983444	0.99637
REGULATION OF PROTEIN EXIT FROM ENDOPLASMIC RETICULUM GOBP GO:0070861	21	0.363412	0.681424	0.910995	0.996377
HISTONE MONOUBIQUITINATION GOBP GO:0010390	29	0.343709	0.680603	0.951807	0.99652
ATM SIGNALING NETWORK IN DEVELOPMENT AND DISEASE WIKIPATHWAYS_20191210 WP3878 HOMO SAPIENS	43	0.324093	0.679552	0.964809	0.99679
NICOTINAMIDE SALVAGING REACTOME R-HSA-197264.5	16	0.385247	0.67915	0.884804	0.996576
IRE1ALPHA ACTIVATES CHAPERONES REACTOME R-HSA-381070.1	46	0.312092	0.678313	0.980392	0.996658
PID_HDAC_CLASSII_PATHWAY MSIGDB_C2 PID_HDAC_CLASSII_PATHWAY	31	0.338724	0.677121	0.954545	0.997013
IL-2 SIGNALING PATHWAY WIKIPATHWAYS_20191210 WP49 HOMO SAPIENS	33	0.331355	0.676148	0.953416	0.997166
CARDIAC CONDUCTION GOBP GO:0061337	49	0.309495	0.675705	0.980392	0.996981
TGF-BETA RECEPTOR SIGNALING PATHWAY INTERACTION DATABASE NCI-NATURE CURATED DATA TGF-BETA RECEPTOR SIGNALING	49	0.318813	0.674656	0.980831	0.997223
NUCLEAR-TRANSCRIBED MRNA CATABOLIC PROCESS, DEADENYLATION-DEPENDENT DECAY GOBP GO:0000288	51	0.312277	0.674631	0.964516	0.996732
PROTEIN TARGETING TO VACUOLE GOBP GO:0006623	32	0.336906	0.674596	0.945402	0.996246
PID_ERA_GENOMIC_PATHWAY MSIGDB_C2 PID_ERA_GENOMIC_PATHWAY	53	0.310601	0.673683	0.986577	0.996372
DNA RECOMBINATION GOBP GO:0006310	142	0.262499	0.673276	1	0.996164
IL23-MEDIATED SIGNALING EVENTS PATHWAY INTERACTION DATABASE NCI-NATURE CURATED DATA IL23-MEDIATED SIGNALING EVENTS	16	0.379156	0.673121	0.885118	0.995752
ACTIVATION OF BH3-ONLY PROTEINS REACTOME DATABASE ID RELEASE 71 114452	27	0.345065	0.672513	0.935393	0.995688
CANNABINOID RECEPTOR SIGNALING WIKIPATHWAYS_20191210 WP3869 HOMO SAPIENS	21	0.359556	0.672023	0.915344	0.995525
SIGNALING EVENTS MEDIATED BY HDAC CLASS II PATHWAY INTERACTION DATABASE NCI-NATURE CURATED DATA SIGNALING EVENTS MEDIATED BY HDAC CLASS II	31	0.338724	0.670388	0.94958	0.996153
INOSITOL PHOSPHATE BIOSYNTHETIC PROCESS GOBP GO:0032958	18	0.3618	0.6701	0.920844	0.995825
MITOTIC SPINDLE CHECKPOINT REACTOME R-HSA-69618.2	107	0.270746	0.669388	0.995935	0.995784
CELLULAR RESPONSE TO AMMONIUM ION GOBP GO:0071242	27	0.337432	0.669279	0.947075	0.995359
PID_IL23_PATHWAY MSIGDB_C2 PID_IL23_PATHWAY	16	0.379156	0.668909	0.908861	0.995108
TCR SIGNALING IN NAIVE CD4+ T CELLS PATHWAY INTERACTION DATABASE NCI-NATURE CURATED DATA TCR SIGNALING IN NAIVE CD4+ T CELLS	41	0.316211	0.668005	0.973856	0.995222
REGULATION OF MICROTUBULE POLYMERIZATION OR DEPOLYMERIZATION GOBP GO:0031110	61	0.300187	0.666681	0.996633	0.995586
SULFUR COMPOUND TRANSPORT GOBP GO:0072348	21	0.360056	0.666291	0.93913	0.995331
GENERAL TRANSCRIPTION REGULATION PANTHER PATHWAY P00023	30	0.336467	0.665866	0.957386	0.995101
POSITIVE REGULATION OF EPITHELIAL CELL DIFFERENTIATION GOBP GO:0030858	25	0.341091	0.66531	0.946746	0.994959
VOLTAGE GATED POTASSIUM CHANNELS REACTOME DATABASE ID RELEASE 71 1296072	18	0.365283	0.6639	0.912821	0.995322
MATURATION OF SSU-RRNA FROM TRICISTRONIC RRNA TRANSCRIPT (SSU-RRNA, 5.8S RRNA, LSU-RRNA) GOBP GO:0000462	27	0.341429	0.663412	0.957704	0.995127
SIG_IL4RECEPTOR_IN_B_LYPHOCYTES MSIGDB_C2 SIG_IL4RECEPTOR_IN_B_LYPHOCYTES	27	0.341656	0.661287	0.949009	0.995984
POSITIVE REGULATION OF HISTONE MODIFICATION GOBP GO:0031058	63	0.291367	0.65853	0.986487	0.997112
NS1 MEDIATED EFFECTS ON HOST PATHWAYS REACTOME R-HSA-168276.5	34	0.323378	0.656999	0.944272	0.997491
POSITIVE REGULATION OF DOUBLE-STRAND BREAK REPAIR GOBP GO:2000781	29	0.324683	0.656472	0.962319	0.99731
PID_TCR_PATHWAY MSIGDB_C2 PID_TCR_PATHWAY	42	0.314016	0.656138	0.979042	0.996986
REGULATION OF SODIUM ION TRANSMEMBRANE TRANSPORT GOBP GO:1902305	36	0.314599	0.653524	0.975535	0.99794
CELLULAR RESPONSE TO INTERLEUKIN-6 GOBP GO:0071354	21	0.338691	0.652618	0.937158	0.997963
E2F MEDIATED REGULATION OF DNA REPLICATION REACTOME R-HSA-113510.3	22	0.340232	0.651352	0.924675	0.998157
HEME METABOLIC PROCESS GOBP GO:0042168	20	0.357158	0.648178	0.947945	0.999348
REGULATION OF AMYLOID-BETA FORMATION GOBP GO:1902003	21	0.347374	0.647489	0.937984	0.999188
RNA POLYMERASE II PRE-TRANSCRIPTION EVENTS REACTOME R-HSA-674695.3	79	0.276623	0.644528	1	1
PEROXISOMAL LIPID METABOLISM REACTOME R-HSA-390918.5	20	0.34347	0.64439	0.939891	0.999759
ALPHA ADRENERGIC RECEPTOR SIGNALING PATHWAY PANTHER PATHWAY P00002	18	0.360397	0.643715	0.946835	0.999584
LIPID METABOLISM PATHWAY WIKIPATHWAYS_20191210 WP3965 HOMO SAPIENS	25	0.326044	0.64308	0.949009	0.999405
PID_DELTA_NP63_PATHWAY MSIGDB_C2 PID_DELTA_NP63_PATHWAY	34	0.309679	0.633145	0.986072	1
GRANULOCYTE MIGRATION GOBP GO:0097530	15	0.356555	0.632721	0.937824	1
POSITIVE REGULATION OF LYMPHOCYTE MEDIATED IMMUNITY GOBP GO:0002708	38	0.302887	0.63213	0.972973	1
REGULATION OF CENTRIOLE REPLICATION GOBP GO:0046599	20	0.33961	0.630525	0.94851	1
POSITIVE REGULATION OF LYMPHOCYTE MIGRATION GOBP GO:2000403	16	0.35647	0.630228	0.933661	1
PEPTIDYL-THREONINE MODIFICATION GOBP GO:0018210	62	0.284485	0.627746	0.996503	1
REGULATION OF HEART RATE BY CARDIAC CONDUCTION GOBP GO:0086091	23	0.333206	0.627558	0.978082	1
SPHINGOLIPID METABOLISM (INTEGRATED PATHWAY) WIKIPATHWAYS_20191210 WP4726 HOMO SAPIENS	19	0.331633	0.625534	0.938005	1
RESPONSE TO INTERLEUKIN-6 GOBP GO:0070741	21	0.338691	0.625194	0.960114	1
BIOCARTA_NDKDYNAMIN_PATHWAY MSIGDB_C2 BIOCARTA_NDKDYNAMIN_PATHWAY	16	0.351785	0.624793	0.958225	1
[truncated: 54 more rows]
