# Supplementary material for: Multi-omic analysis of bat versus human fibroblasts reveals altered central metabolism
Source: eLife. 2024 Jul 22;13:e94007. doi: 10.7554/eLife.94007 (PMC11262796; doi:10.7554/eLife.94007)
Supplement: Supplementary file 5. — GSEA was performed on the proteomics data using protein abundances as input. The table below lists the pathways detected as upregulated in PaLung cells (compared to WI-38 cells) and associated enrichment metrics. [file elife-94007-supp5.xlsx]

## Sheet: Index
Title	Multi-omic analysis of bat versus human fibroblasts reveals altered central metabolism
Authors	N. Suhas Jagannathan, Javier Yu Peng Koh, Younghwan Lee, Radoslaw M Sobota, Aaron Irving, Lin-Fa Wang, Yoko Itahana, Koji Itahana, Lisa Tucker-Kellogg
Supplementary Table No.	Supplementary Table 5
Supplementary Table Title	Biological pathways upregulated in PaLung cells from Gene Set Enrichment Analysis of Proteomics data
Description	GSEA was performed on the Proteomics data using protein abundances as input. The table below lists the pathways detected as upregulated in PaLung cells (compared to WI-38 cells) and associated enrichment metrics
Column header	Contents
NAME	Name of Gene Set/Pathway
SIZE	Number of genes in gene set/pathway
ES	Enrichment Score from GSEA
NES	Normalized enrichment score from GSEA
NOM p-val	p value computed from GSEA
FDR q-val	FDR corrected p-values obtained from GSEA

## Sheet: Supp_Table_5_GSEA_Proteomics_Pa
NAME	SIZE	ES	NES	NOM p-val	FDR q-val
MUSCLE CONTRACTION GOBP GO:0006936	35	-0.584451	-2.29	0	0.00803384
NICOTINIC ACETYLCHOLINE RECEPTOR SIGNALING PATHWAY PANTHER PATHWAY P00044	15	-0.711855	-2.17947	0	0.0182383
REGULATION OF CELL JUNCTION ASSEMBLY GOBP GO:1901888	15	-0.695352	-2.17782	0	0.0121589
THE CITRIC ACID (TCA) CYCLE AND RESPIRATORY ELECTRON TRANSPORT REACTOME R-HSA-1428517.1	64	-0.474121	-2.13697	0	0.0151377
HALLMARK_OXIDATIVE_PHOSPHORYLATION MSIGDB_C2 HALLMARK_OXIDATIVE_PHOSPHORYLATION	91	-0.430656	-2.12375	0	0.0138521
COLLAGEN FORMATION REACTOME DATABASE ID RELEASE 71 1474290	31	-0.558787	-2.11295	0	0.0133743
MUSCLE SYSTEM PROCESS GOBP GO:0003012	40	-0.511261	-2.07522	0	0.0171718
EPH-EPHRIN SIGNALING REACTOME DATABASE ID RELEASE 71 2682334	30	-0.549762	-2.06553	0	0.0167534
ACTIN FILAMENT-BASED MOVEMENT GOBP GO:0030048	17	-0.640344	-2.05773	0.0020202	0.0170063
RESPIRATORY ELECTRON TRANSPORT REACTOME R-HSA-611105.3	32	-0.53475	-2.0515	0	0.0166118
RHO GTPASES ACTIVATE PKNS REACTOME DATABASE ID RELEASE 71 5625740	17	-0.637887	-2.0504	0	0.0153693
COLLAGEN BIOSYNTHESIS AND MODIFYING ENZYMES REACTOME R-HSA-1650814.3	25	-0.56618	-2.03023	0	0.0182641
RESPIRATORY ELECTRON TRANSPORT, ATP SYNTHESIS BY CHEMIOSMOTIC COUPLING, AND HEAT PRODUCTION BY UNCOUPLING PROTEINS. REACTOME R-HSA-163200.1	32	-0.53475	-2.0253	0	0.0179674
COMPLEX I BIOGENESIS REACTOME R-HSA-6799198.1	16	-0.628472	-2.02379	0	0.0168917
MITOCHONDRIAL RESPIRATORY CHAIN COMPLEX I ASSEMBLY GOBP GO:0032981	16	-0.628472	-2.01705	0.0018797	0.0167303
INTEGRIN SIGNALLING PATHWAY PANTHER PATHWAY P00034	44	-0.484895	-2.00758	0	0.0172394
NADH DEHYDROGENASE COMPLEX ASSEMBLY GOBP GO:0010257	16	-0.628472	-1.99919	0.0059761	0.0179015
MITOCHONDRIAL ATP SYNTHESIS COUPLED ELECTRON TRANSPORT GOBP GO:0042775	26	-0.544382	-1.99497	0.0019305	0.0175599
ACTOMYOSIN STRUCTURE ORGANIZATION GOBP GO:0031032	21	-0.582485	-1.98512	0.00191939	0.0185777
KERATINIZATION GOBP GO:0031424	15	-0.626209	-1.96272	0.00202429	0.024099
MITOCHONDRIAL RESPIRATORY CHAIN COMPLEX ASSEMBLY GOBP GO:0033108	19	-0.590989	-1.96037	0	0.0234055
KERATINIZATION REACTOME DATABASE ID RELEASE 71 6805567	15	-0.626209	-1.95669	0.00421941	0.0228397
NABA_CORE_MATRISOME MSIGDB_C2 NABA_CORE_MATRISOME	34	-0.494343	-1.95142	0.00369004	0.023114
CELLULAR RESPIRATION GOBP GO:0045333	52	-0.448243	-1.94864	0	0.0229122
CORNIFICATION GOBP GO:0070268	15	-0.626209	-1.94841	0.00195695	0.0220249
MIDBRAIN DEVELOPMENT GOBP GO:0030901	15	-0.625843	-1.94498	0.00195312	0.0219663
SYSTEM PROCESS GOBP GO:0003008	77	-0.414458	-1.94086	0	0.0221245
ELECTRON TRANSPORT CHAIN (OXPHOS SYSTEM IN MITOCHONDRIA) WIKIPATHWAYS_20191210 WP111 HOMO SAPIENS	28	-0.532404	-1.92502	0	0.0254259
MITOCHONDRIAL ELECTRON TRANSPORT, NADH TO UBIQUINONE GOBP GO:0006120	15	-0.615797	-1.89082	0	0.0349009
CELL JUNCTION ORGANIZATION GOBP GO:0034330	31	-0.488971	-1.88281	0	0.0365581
RHO GTPASES ACTIVATE PAKS REACTOME R-HSA-5627123.2	16	-0.593864	-1.86568	0.00590551	0.041791
OXIDATIVE PHOSPHORYLATION GOBP GO:0006119	27	-0.501004	-1.86342	0.00181488	0.0412572
EXTRACELLULAR MATRIX ORGANIZATION REACTOME DATABASE ID RELEASE 71 1474244	59	-0.417715	-1.85709	0	0.042404
HALLMARK_ESTROGEN_RESPONSE_EARLY MSIGDB_C2 HALLMARK_ESTROGEN_RESPONSE_EARLY	16	-0.586839	-1.8545	0.00392157	0.0421188
ELECTRON TRANSPORT CHAIN GOBP GO:0022900	31	-0.471282	-1.84442	0.00186916	0.0448948
ATP SYNTHESIS COUPLED ELECTRON TRANSPORT GOBP GO:0042773	27	-0.501004	-1.84152	0	0.044759
INFLAMMATION MEDIATED BY CHEMOKINE AND CYTOKINE SIGNALING PATHWAY PANTHER PATHWAY P00031	30	-0.485067	-1.81024	0.00581395	0.0568162
RESPIRATORY ELECTRON TRANSPORT CHAIN GOBP GO:0022904	31	-0.471282	-1.80518	0.00189394	0.0578955
ACTIN FILAMENT-BASED PROCESS GOBP GO:0030029	98	-0.36627	-1.78713	0	0.0654864
ASSEMBLY OF COLLAGEN FIBRILS AND OTHER MULTIMERIC STRUCTURES REACTOME DATABASE ID RELEASE 71 2022090	18	-0.540068	-1.77917	0.00616016	0.0686645
ION TRANSMEMBRANE TRANSPORT GOBP GO:0034220	27	-0.478212	-1.77026	0.0117878	0.0721311
BRAIN DEVELOPMENT GOBP GO:0007420	31	-0.460783	-1.7608	0.00373134	0.076658
HALLMARK_PROTEIN_SECRETION MSIGDB_C2 HALLMARK_PROTEIN_SECRETION	32	-0.447261	-1.75084	0.00609756	0.0812284
RECEPTOR-MEDIATED ENDOCYTOSIS GOBP GO:0006898	31	-0.460141	-1.74778	0.00763359	0.0817015
CELL JUNCTION ASSEMBLY GOBP GO:0034329	30	-0.466676	-1.74628	0.0113852	0.0808559
KERATINOCYTE DIFFERENTIATION GOBP GO:0030216	20	-0.512058	-1.74173	0.00753296	0.0824321
EPHRIN RECEPTOR SIGNALING PATHWAY GOBP GO:0048013	20	-0.515011	-1.74004	0.00790514	0.0819176
MULTICELLULAR ORGANISMAL PROCESS GOBP GO:0032501	349	-0.296035	-1.73946	0	0.0805763
EPIDERMAL CELL DIFFERENTIATION GOBP GO:0009913	22	-0.500417	-1.73555	0.00738007	0.0817648
HEAD DEVELOPMENT GOBP GO:0060322	31	-0.460783	-1.73034	0.00194932	0.0835441
CATION TRANSPORT GOBP GO:0006812	25	-0.478072	-1.71917	0.00743494	0.0900115
TUBE DEVELOPMENT GOBP GO:0035295	27	-0.459625	-1.71855	0.0115163	0.0888001
REGULATION OF IGF ACTIVITY BY IGFBP REACTOME R-HSA-381426.2	24	-0.484684	-1.69571	0.0135659	0.103621
INORGANIC ION TRANSMEMBRANE TRANSPORT GOBP GO:0098660	17	-0.530061	-1.69514	0.0213178	0.102199
IMPORT INTO CELL GOBP GO:0098657	73	-0.362322	-1.68826	0	0.10541
VASCULATURE DEVELOPMENT GOBP GO:0001944	25	-0.472907	-1.68661	0.0108499	0.104648
BLOOD VESSEL DEVELOPMENT GOBP GO:0001568	24	-0.476211	-1.68629	0.0106952	0.103131
WOUND HEALING GOBP GO:0042060	43	-0.403909	-1.67949	0.0132576	0.107212
THIOESTER METABOLIC PROCESS GOBP GO:0035383	21	-0.485247	-1.67587	0.0170455	0.108448
BETA1 INTEGRIN CELL SURFACE INTERACTIONS PATHWAY INTERACTION DATABASE NCI-NATURE CURATED DATA BETA1 INTEGRIN CELL SURFACE INTERACTIONS	23	-0.478561	-1.67154	0.015444	0.110452
ACYL-COA METABOLIC PROCESS GOBP GO:0006637	21	-0.485247	-1.66987	0.0148699	0.109894
ACTIN CYTOSKELETON ORGANIZATION GOBP GO:0030036	88	-0.344439	-1.66702	0.00379507	0.110612
INORGANIC CATION TRANSMEMBRANE TRANSPORT GOBP GO:0098662	16	-0.51439	-1.66254	0.0177515	0.11294
HALLMARK_APICAL_JUNCTION MSIGDB_C2 HALLMARK_APICAL_JUNCTION	39	-0.409708	-1.66014	0.0116054	0.11315
SKIN DEVELOPMENT GOBP GO:0043588	26	-0.458433	-1.65398	0.0171756	0.116796
CARDIOVASCULAR SYSTEM DEVELOPMENT GOBP GO:0072358	26	-0.453094	-1.6512	0.0136719	0.117197
MOVEMENT OF CELL OR SUBCELLULAR COMPONENT GOBP GO:0006928	112	-0.327901	-1.65089	0.00558659	0.115689
CATION TRANSMEMBRANE TRANSPORT GOBP GO:0098655	16	-0.51439	-1.65087	0.0233918	0.113998
ANIMAL ORGAN DEVELOPMENT GOBP GO:0048513	142	-0.312237	-1.64343	0	0.119225
PID_INTEGRIN1_PATHWAY MSIGDB_C2 PID_INTEGRIN1_PATHWAY	23	-0.478561	-1.64137	0.0117878	0.119305
CELLULAR RESPONSE TO ORGANIC CYCLIC COMPOUND GOBP GO:0071407	27	-0.445465	-1.63913	0.0215686	0.119718
POST-TRANSLATIONAL PROTEIN PHOSPHORYLATION REACTOME DATABASE ID RELEASE 71 8957275	23	-0.470724	-1.63562	0.0210728	0.121515
PATHOGENIC ESCHERICHIA COLI INFECTION WIKIPATHWAYS_20191210 WP2272 HOMO SAPIENS	23	-0.458619	-1.63039	0.0227704	0.125014
EBOLA VIRUS PATHWAY ON HOST WIKIPATHWAYS_20191210 WP4217 HOMO SAPIENS	27	-0.434279	-1.62664	0.0229446	0.12656
MUSCLE CONTRACTION REACTOME DATABASE ID RELEASE 71 397014	33	-0.415576	-1.62511	0.0252918	0.126161
BLOOD VESSEL MORPHOGENESIS GOBP GO:0048514	21	-0.465152	-1.62272	0.0245283	0.126673
ENERGY DERIVATION BY OXIDATION OF ORGANIC COMPOUNDS GOBP GO:0015980	59	-0.358983	-1.60361	0.00180832	0.143555
EXTRACELLULAR STRUCTURE ORGANIZATION GOBP GO:0043062	49	-0.378202	-1.59383	0.0148148	0.151818
POSITIVE REGULATION OF CELL MORPHOGENESIS INVOLVED IN DIFFERENTIATION GOBP GO:0010770	17	-0.494037	-1.59186	0.0236686	0.152111
GOLGI VESICLE TRANSPORT GOBP GO:0048193	50	-0.368635	-1.58128	0.0175097	0.162167
NABA_ECM_GLYCOPROTEINS MSIGDB_C2 NABA_ECM_GLYCOPROTEINS	19	-0.481314	-1.57841	0.0189394	0.163615
COAGULATION GOBP GO:0050817	28	-0.423633	-1.57835	0.0277778	0.161672
PYRUVATE METABOLISM AND CITRIC ACID (TCA) CYCLE REACTOME R-HSA-71406.1	34	-0.399821	-1.57646	0.0268199	0.162011
BLOOD COAGULATION GOBP GO:0007596	28	-0.423633	-1.56836	0.0189394	0.168837
HALLMARK_MYOGENESIS MSIGDB_C2 HALLMARK_MYOGENESIS	39	-0.389911	-1.5672	0.0132325	0.168322
ION TRANSPORT GOBP GO:0006811	48	-0.365882	-1.56146	0.0186916	0.172681
REGULATION OF LIPID METABOLIC PROCESS GOBP GO:0019216	29	-0.414191	-1.56082	0.0176471	0.171293
FOCAL ADHESION-PI3K-AKT-MTOR-SIGNALING PATHWAY WIKIPATHWAYS_20191210 WP3932 HOMO SAPIENS	36	-0.393146	-1.55894	0.0292398	0.171475
MITOCHONDRIAL FATTY ACID BETA-OXIDATION REACTOME R-HSA-77289.5	19	-0.465492	-1.55856	0.0361446	0.170013
ENDOCYTOSIS GOBP GO:0006897	69	-0.340583	-1.55837	0.0148699	0.168294
METAL ION TRANSPORT GOBP GO:0030001	22	-0.446692	-1.55555	0.0309091	0.169657
TUBE MORPHOGENESIS GOBP GO:0035239	26	-0.433925	-1.55404	0.0306513	0.169572
SLC TRANSPORTER DISORDERS REACTOME R-HSA-5619102.5	18	-0.47267	-1.55128	0.0294118	0.170806
FATTY ACID CATABOLIC PROCESS GOBP GO:0009062	28	-0.425325	-1.54952	0.0457143	0.170959
ANGIOGENESIS GOBP GO:0001525	17	-0.479379	-1.54926	0.0328185	0.169528
EXTRACELLULAR MATRIX ORGANIZATION GOBP GO:0030198	46	-0.365954	-1.54021	0.020202	0.178183
TRANS-GOLGI NETWORK VESICLE BUDDING REACTOME R-HSA-199992.3	17	-0.468038	-1.52811	0.0368217	0.191576
AEROBIC RESPIRATION GOBP GO:0009060	32	-0.394634	-1.52622	0.0471698	0.191967
RHO GTPASE EFFECTORS REACTOME R-HSA-195258.3	58	-0.341411	-1.5259	0.0183486	0.190426
TCA CYCLE (AKA KREBS OR CITRIC ACID CYCLE) WIKIPATHWAYS_20191210 WP78 HOMO SAPIENS	15	-0.483202	-1.52108	0.0342052	0.194983
MITOCHONDRIAL PROTEIN IMPORT REACTOME DATABASE ID RELEASE 71 1268020	19	-0.449099	-1.51489	0.0462428	0.200844
OSTEOBLAST DIFFERENTIATION GOBP GO:0001649	15	-0.484009	-1.51479	0.0550285	0.199011
CELL MOTILITY GOBP GO:0048870	67	-0.327792	-1.51411	0.0250965	0.197899
FATTY ACID METABOLISM REACTOME DATABASE ID RELEASE 71 8978868	28	-0.406436	-1.51333	0.0337302	0.196934
SIGNALING BY RHO GTPASES REACTOME DATABASE ID RELEASE 71 194315	65	-0.332638	-1.50615	0.0242991	0.204665
REGULATION OF CELL-SUBSTRATE ADHESION GOBP GO:0010810	29	-0.404458	-1.50347	0.0331384	0.205969
RESPONSE TO WOUNDING GOBP GO:0009611	48	-0.350459	-1.49953	0.0255941	0.209413
FOCAL ADHESION WIKIPATHWAYS_20191210 WP306 HOMO SAPIENS	50	-0.352089	-1.49797	0.0215686	0.209553
BIOLOGICAL ADHESION GOBP GO:0022610	53	-0.345317	-1.49789	0.0237226	0.207718
TISSUE DEVELOPMENT GOBP GO:0009888	128	-0.291163	-1.49716	0.0126354	0.206823
CELL ADHESION GOBP GO:0007155	51	-0.344623	-1.49206	0.0362319	0.212107
LOCALIZATION OF CELL GOBP GO:0051674	67	-0.327792	-1.48972	0.0168856	0.213052
ANATOMICAL STRUCTURE FORMATION INVOLVED IN MORPHOGENESIS GOBP GO:0048646	48	-0.342824	-1.4855	0.0423892	0.21647
ANATOMICAL STRUCTURE MORPHOGENESIS GOBP GO:0009653	122	-0.286489	-1.48025	0.0144665	0.221657
LOCOMOTION GOBP GO:0040011	83	-0.312716	-1.47514	0.0127737	0.22741
HEMOSTASIS GOBP GO:0007599	29	-0.384816	-1.46609	0.0451866	0.2389
EPIDERMIS DEVELOPMENT GOBP GO:0008544	26	-0.405449	-1.46231	0.056391	0.242769
REGULATION OF CELL ADHESION GOBP GO:0030155	57	-0.326457	-1.46202	0.032197	0.241118
CELL-MATRIX ADHESION GOBP GO:0007160	15	-0.471791	-1.45078	0.0863454	0.256511
SEMAPHORIN INTERACTIONS REACTOME R-HSA-373755.1	19	-0.437516	-1.44955	0.0719844	0.256184
FATTY ACID BETA OXIDATION WIKIPATHWAYS_20191210 WP143 HOMO SAPIENS	15	-0.462513	-1.44679	0.0789474	0.258426
PROTEIN LOCALIZATION TO CELL PERIPHERY GOBP GO:1990778	22	-0.40678	-1.44571	0.0653465	0.257975
CELL-CELL JUNCTION ORGANIZATION GOBP GO:0045216	15	-0.467764	-1.44479	0.0873606	0.257233
CENTRAL NERVOUS SYSTEM DEVELOPMENT GOBP GO:0007417	41	-0.354978	-1.44459	0.0531496	0.255457
PROTEIN LOCALIZATION TO MEMBRANE GOBP GO:0072657	68	-0.317396	-1.4414	0.0299065	0.25833
MULTICELLULAR ORGANISM DEVELOPMENT GOBP GO:0007275	238	-0.253302	-1.44059	0.00728598	0.257539
CELL-CELL COMMUNICATION REACTOME DATABASE ID RELEASE 71 1500931	16	-0.454772	-1.43801	0.0772277	0.259681
MYOMETRIAL RELAXATION AND CONTRACTION PATHWAYS WIKIPATHWAYS_20191210 WP289 HOMO SAPIENS	22	-0.420199	-1.43729	0.0803059	0.258816
CITRIC ACID CYCLE (TCA CYCLE) REACTOME DATABASE ID RELEASE 71 71403	19	-0.429882	-1.4358	0.082218	0.259212
CELLULAR LIPID CATABOLIC PROCESS GOBP GO:0044242	35	-0.363479	-1.43476	0.054409	0.258911
EPITHELIUM DEVELOPMENT GOBP GO:0060429	75	-0.305921	-1.4347	0.026465	0.257019
INFLUENZA LIFE CYCLE REACTOME DATABASE ID RELEASE 71 168255	57	-0.321257	-1.43235	0.0307102	0.258709
VESICLE-MEDIATED TRANSPORT REACTOME R-HSA-5653656.2	113	-0.280868	-1.42932	0.0171756	0.261668
REGULATION OF CELL-MATRIX ADHESION GOBP GO:0001952	16	-0.448568	-1.42405	0.085389	0.268025
CIRCULATORY SYSTEM PROCESS GOBP GO:0003013	18	-0.429433	-1.42102	0.082397	0.270822
LIPID CATABOLIC PROCESS GOBP GO:0016042	37	-0.357576	-1.4199	0.0645161	0.270758
SMOOTH MUSCLE CONTRACTION REACTOME R-HSA-445355.3	24	-0.397527	-1.41836	0.0727273	0.271379
REGULATION OF SYSTEM PROCESS GOBP GO:0044057	33	-0.366089	-1.41397	0.0732177	0.276726
INFLUENZA INFECTION REACTOME R-HSA-168254.2	58	-0.318881	-1.41393	0.0271739	0.27482
FATTY ACID BETA-OXIDATION GOBP GO:0006635	25	-0.394901	-1.41385	0.0680529	0.272955
BLOOD CIRCULATION GOBP GO:0008015	18	-0.429433	-1.41261	0.0787402	0.273162
TRANSPORT OF SMALL MOLECULES REACTOME DATABASE ID RELEASE 71 382551	71	-0.307398	-1.41159	0.042471	0.272755
CYTOSKELETON ORGANIZATION GOBP GO:0007010	138	-0.27085	-1.4067	0.0215054	0.278999
CIRCULATORY SYSTEM DEVELOPMENT GOBP GO:0072359	43	-0.340919	-1.40644	0.0453686	0.277434
MEMBRANE ORGANIZATION GOBP GO:0061024	109	-0.276888	-1.40264	0.0254669	0.281736
CELL-SUBSTRATE ADHESION GOBP GO:0031589	20	-0.412086	-1.39457	0.0914286	0.293627
SUMOYLATION OF RNA BINDING PROTEINS REACTOME R-HSA-4570464.2	21	-0.411182	-1.3923	0.0684411	0.29563
CELLULAR COMPONENT MORPHOGENESIS GOBP GO:0032989	66	-0.309506	-1.39078	0.040293	0.296331
NONALCOHOLIC FATTY LIVER DISEASE WIKIPATHWAYS_20191210 WP4396 HOMO SAPIENS	35	-0.354372	-1.39054	0.0764925	0.294677
LIPID MODIFICATION GOBP GO:0030258	27	-0.374574	-1.39025	0.0806142	0.293218
MITOCHONDRION ORGANIZATION GOBP GO:0007005	65	-0.309644	-1.39017	0.0386029	0.291411
TRANSMISSION ACROSS CHEMICAL SYNAPSES REACTOME R-HSA-112315.5	18	-0.412759	-1.38379	0.083004	0.299904
SYSTEM DEVELOPMENT GOBP GO:0048731	228	-0.246497	-1.37789	0.0110092	0.308496
NERVOUS SYSTEM PROCESS GOBP GO:0050877	24	-0.39561	-1.37618	0.100592	0.309539
OSSIFICATION GOBP GO:0001503	19	-0.408926	-1.37426	0.118868	0.311035
FATTY ACID METABOLIC PROCESS GOBP GO:0006631	42	-0.331846	-1.37092	0.082218	0.315214
SUPRAMOLECULAR FIBER ORGANIZATION GOBP GO:0097435	77	-0.289792	-1.36963	0.0532319	0.315362
ORGANIC SUBSTANCE TRANSPORT GOBP GO:0071702	201	-0.245639	-1.36578	0.0207547	0.320564
POSITIVE REGULATION OF CELL DEVELOPMENT GOBP GO:0010720	33	-0.350117	-1.36576	0.0932358	0.318603
REGULATION OF PROTEIN LOCALIZATION TO CELL PERIPHERY GOBP GO:1904375	18	-0.414002	-1.3641	0.109712	0.319598
HIPPO-MERLIN SIGNALING DYSREGULATION WIKIPATHWAYS_20191210 WP4541 HOMO SAPIENS	15	-0.437147	-1.3609	0.118774	0.323739
CYTOSOLIC TRANSPORT GOBP GO:0016482	16	-0.430601	-1.35895	0.104034	0.325363
GLYCOPROTEIN METABOLIC PROCESS GOBP GO:0009100	23	-0.3786	-1.3566	0.11609	0.327924
ESTABLISHMENT OF LOCALIZATION IN CELL GOBP GO:0051649	233	-0.240248	-1.35395	0.0163339	0.330856
CHAPERONIN-MEDIATED PROTEIN FOLDING REACTOME DATABASE ID RELEASE 71 390466	22	-0.384644	-1.35206	0.115596	0.332244
SRP-DEPENDENT COTRANSLATIONAL PROTEIN TARGETING TO MEMBRANE REACTOME R-HSA-1799339.2	37	-0.334852	-1.3479	0.0977012	0.338286
PROTEIN TARGETING TO MEMBRANE GOBP GO:0006612	39	-0.331416	-1.34706	0.0849421	0.337787
ANATOMICAL STRUCTURE DEVELOPMENT GOBP GO:0048856	287	-0.232121	-1.34259	0.0219966	0.344208
L1CAM INTERACTIONS REACTOME DATABASE ID RELEASE 71 373760	22	-0.386457	-1.34165	0.0968343	0.344104
INTEGRINS IN ANGIOGENESIS PATHWAY INTERACTION DATABASE NCI-NATURE CURATED DATA INTEGRINS IN ANGIOGENESIS	17	-0.419486	-1.34009	0.123142	0.345006
PID_AVB3_INTEGRIN_PATHWAY MSIGDB_C2 PID_AVB3_INTEGRIN_PATHWAY	18	-0.404506	-1.33502	0.11943	0.352553
REGULATION OF COFACTOR METABOLIC PROCESS GOBP GO:0051193	26	-0.364501	-1.33492	0.112245	0.350766
RIBONUCLEOSIDE BISPHOSPHATE METABOLIC PROCESS GOBP GO:0033875	23	-0.375713	-1.3308	0.11412	0.356523
PROTEIN LOCALIZATION TO PLASMA MEMBRANE GOBP GO:0072659	19	-0.397885	-1.33064	0.130604	0.354739
CELL MIGRATION GOBP GO:0016477	58	-0.301131	-1.3237	0.0722222	0.366655
PROTEIN FOLDING GOBP GO:0006457	68	-0.291804	-1.32238	0.0848375	0.367138
ALZHEIMER DISEASE-PRESENILIN PATHWAY PANTHER PATHWAY P00004	16	-0.420084	-1.31572	0.151515	0.378468
PYRUVATE METABOLISM REACTOME R-HSA-70268.6	16	-0.418645	-1.31469	0.141791	0.378405
NUCLEOSIDE BISPHOSPHATE METABOLIC PROCESS GOBP GO:0033865	23	-0.375713	-1.31227	0.112621	0.381309
PURINE NUCLEOSIDE BISPHOSPHATE METABOLIC PROCESS GOBP GO:0034032	23	-0.375713	-1.31101	0.143403	0.381884
CELL DEVELOPMENT GOBP GO:0048468	97	-0.269342	-1.31034	0.0690299	0.381088
PLATELET ACTIVATION GOBP GO:0030168	17	-0.40482	-1.30953	0.135531	0.380617
PROTEIN LOCALIZATION GOBP GO:0008104	244	-0.233249	-1.30705	0.0327273	0.383503
MORPHOGENESIS OF AN EPITHELIUM GOBP GO:0002009	20	-0.380661	-1.30028	0.145594	0.39567
METABOLISM OF VITAMINS AND COFACTORS REACTOME DATABASE ID RELEASE 71 196854	23	-0.373597	-1.29757	0.140952	0.399414
SIGNALING BY NUCLEAR RECEPTORS REACTOME DATABASE ID RELEASE 71 9006931	31	-0.339003	-1.29715	0.145068	0.398149
RESPONSE TO ORGANIC CYCLIC COMPOUND GOBP GO:0014070	32	-0.332194	-1.29614	0.144487	0.39831
REGULATION OF COENZYME METABOLIC PROCESS GOBP GO:0051196	26	-0.364501	-1.29568	0.151119	0.397165
HALLMARK_EPITHELIAL_MESENCHYMAL_TRANSITION MSIGDB_C2 HALLMARK_EPITHELIAL_MESENCHYMAL_TRANSITION	61	-0.288313	-1.29391	0.0948767	0.399055
INFLUENZA VIRAL RNA TRANSCRIPTION AND REPLICATION REACTOME DATABASE ID RELEASE 71 168273	52	-0.298842	-1.29287	0.120755	0.398964
NITROGEN COMPOUND TRANSPORT GOBP GO:0071705	191	-0.234281	-1.29051	0.0658363	0.401788
DEVELOPMENTAL PROCESS GOBP GO:0032502	318	-0.222845	-1.28983	0.0363951	0.401207
SIGNALING BY RECEPTOR TYROSINE KINASES REACTOME DATABASE ID RELEASE 71 9006934	62	-0.286316	-1.28418	0.09375	0.410954
MONOCARBOXYLIC ACID CATABOLIC PROCESS GOBP GO:0072329	31	-0.330436	-1.2837	0.128205	0.409878
MACROMOLECULE LOCALIZATION GOBP GO:0033036	260	-0.22474	-1.28259	0.0292505	0.410218
SIGNALING BY NTRK1 (TRKA) REACTOME DATABASE ID RELEASE 71 187037	15	-0.415616	-1.28147	0.164151	0.410503
LIPID OXIDATION GOBP GO:0034440	26	-0.346094	-1.28143	0.148362	0.408511
EPITHELIAL CELL DIFFERENTIATION GOBP GO:0030855	61	-0.28609	-1.28083	0.118095	0.407604
LIPID METABOLIC PROCESS GOBP GO:0006629	87	-0.264844	-1.27864	0.084063	0.410257
REGULATION OF NUCLEOTIDE BIOSYNTHETIC PROCESS GOBP GO:0030808	28	-0.345519	-1.27753	0.141748	0.410537
VIRAL TRANSCRIPTION GOBP GO:0019083	49	-0.302514	-1.27753	0.120983	0.408498
POSITIVE REGULATION OF CELL ADHESION GOBP GO:0045785	35	-0.32533	-1.27613	0.143126	0.409298
REGULATION OF ACTIN DYNAMICS FOR PHAGOCYTIC CUP FORMATION REACTOME DATABASE ID RELEASE 71 2029482	20	-0.379716	-1.27449	0.139764	0.410736
METABOLISM OF WATER-SOLUBLE VITAMINS AND COFACTORS REACTOME DATABASE ID RELEASE 71 196849	15	-0.413418	-1.27345	0.162427	0.41102
GOLGI VESICLE BUDDING GOBP GO:0048194	15	-0.409048	-1.27321	0.180113	0.409502
CELLULAR LIPID METABOLIC PROCESS GOBP GO:0044255	78	-0.275973	-1.27086	0.0863039	0.412586
PROTEIN LOCALIZATION TO ENDOPLASMIC RETICULUM GOBP GO:0070972	38	-0.312614	-1.26772	0.151277	0.417184
REGULATION OF PURINE NUCLEOTIDE BIOSYNTHETIC PROCESS GOBP GO:1900371	28	-0.345519	-1.26527	0.157685	0.420252
INTRACELLULAR TRANSPORT GOBP GO:0046907	215	-0.225831	-1.26494	0.0510949	0.419008
TISSUE MORPHOGENESIS GOBP GO:0048729	32	-0.329591	-1.26461	0.159681	0.417773
COTRANSLATIONAL PROTEIN TARGETING TO MEMBRANE GOBP GO:0006613	35	-0.325827	-1.26455	0.168627	0.415907
ANION TRANSPORT GOBP GO:0006820	20	-0.368482	-1.26388	0.17	0.415356
PROGRAMMED CELL DEATH GOBP GO:0012501	58	-0.289333	-1.26382	0.124294	0.413568
REGULATION OF PROTEIN LOCALIZATION TO PLASMA MEMBRANE GOBP GO:1903076	17	-0.3877	-1.26263	0.171815	0.414346
TRANSMEMBRANE RECEPTOR PROTEIN TYROSINE KINASE SIGNALING PATHWAY GOBP GO:0007169	57	-0.28745	-1.26057	0.13852	0.416905
MEMBRANE TRAFFICKING REACTOME DATABASE ID RELEASE 71 199991	101	-0.251191	-1.26025	0.105647	0.415673
FRAGILE X SYNDROME WIKIPATHWAYS_20191210 WP4549 HOMO SAPIENS	19	-0.37598	-1.2591	0.169202	0.416345
FATTY ACID OXIDATION GOBP GO:0019395	26	-0.346094	-1.25824	0.166667	0.416242
NEURONAL SYSTEM REACTOME DATABASE ID RELEASE 71 112316	24	-0.356738	-1.25553	0.162933	0.420234
TRANSLATION REACTOME DATABASE ID RELEASE 71 72766	68	-0.274297	-1.25237	0.124304	0.424992
NEURON PROJECTION GUIDANCE GOBP GO:0097485	15	-0.4023	-1.25229	0.189655	0.42325
CELLULAR LOCALIZATION GOBP GO:0051641	288	-0.216571	-1.25183	0.0402098	0.4223
CELL-CELL ADHESION GOBP GO:0098609	27	-0.335801	-1.24868	0.155945	0.427208
AXON GUIDANCE GOBP GO:0007411	15	-0.4023	-1.24725	0.175908	0.428577
MUSCLE TISSUE DEVELOPMENT GOBP GO:0060537	16	-0.3915	-1.24526	0.182171	0.430827
PEPTIDE TRANSPORT GOBP GO:0015833	182	-0.22824	-1.24309	0.0797101	0.433701
CALCIUM ION HOMEOSTASIS GOBP GO:0055074	19	-0.368191	-1.24265	0.192982	0.432765
SUDDEN INFANT DEATH SYNDROME (SIDS) SUSCEPTIBILITY PATHWAYS WIKIPATHWAYS_20191210 WP706 HOMO SAPIENS	19	-0.374359	-1.24106	0.187984	0.434096
CELL DEATH GOBP GO:0008219	60	-0.275721	-1.23859	0.126866	0.43746
VESICLE LOCALIZATION GOBP GO:0051648	20	-0.363516	-1.23828	0.173828	0.436175
ESTABLISHMENT OF VESICLE LOCALIZATION GOBP GO:0051650	20	-0.363516	-1.23393	0.166352	0.443659
PROTEIN TRANSPORT GOBP GO:0015031	182	-0.22824	-1.23251	0.0980036	0.445084
NEGATIVE REGULATION OF CELL PROLIFERATION GOBP GO:0008285	34	-0.315369	-1.23042	0.169492	0.447694
ESTABLISHMENT OF PROTEIN LOCALIZATION TO MEMBRANE GOBP GO:0090150	52	-0.281842	-1.22751	0.170732	0.452377
HUNTINGTON DISEASE PANTHER PATHWAY P00029	32	-0.323794	-1.22738	0.181648	0.450724
ACTIN FILAMENT ORGANIZATION GOBP GO:0007015	53	-0.280915	-1.22554	0.17179	0.452856
REGULATION OF SMALL GTPASE MEDIATED SIGNAL TRANSDUCTION GOBP GO:0051056	20	-0.355529	-1.22406	0.201245	0.454109
EMBRYO DEVELOPMENT GOBP GO:0009790	29	-0.323401	-1.22317	0.196226	0.454299
HEMOSTASIS REACTOME R-HSA-109582.2	72	-0.260202	-1.22017	0.143689	0.459074
CELLULAR CALCIUM ION HOMEOSTASIS GOBP GO:0006874	19	-0.368191	-1.22016	0.196787	0.457167
NEGATIVE REGULATION OF SUPRAMOLECULAR FIBER ORGANIZATION GOBP GO:1902904	23	-0.345555	-1.21752	0.192607	0.461472
CLATHRIN-MEDIATED ENDOCYTOSIS REACTOME DATABASE ID RELEASE 71 8856828	40	-0.29171	-1.21486	0.161049	0.465864
ESTABLISHMENT OF PROTEIN LOCALIZATION GOBP GO:0045184	191	-0.221627	-1.21178	0.099115	0.470993
AMIDE TRANSPORT GOBP GO:0042886	184	-0.225198	-1.21176	0.105556	0.46911
VESICLE ORGANIZATION GOBP GO:0016050	38	-0.306931	-1.20757	0.183712	0.476696
REGULATION OF CELL MORPHOGENESIS GOBP GO:0022604	47	-0.286435	-1.19682	0.19305	0.499957
CELLULAR CHEMICAL HOMEOSTASIS GOBP GO:0055082	46	-0.284517	-1.19572	0.196998	0.500513
SNRNP ASSEMBLY REACTOME DATABASE ID RELEASE 71 191859	18	-0.357211	-1.19475	0.221172	0.500788
HALLMARK_ESTROGEN_RESPONSE_LATE MSIGDB_C2 HALLMARK_ESTROGEN_RESPONSE_LATE	20	-0.349116	-1.19141	0.223062	0.507003
TRANSPORT OF THE SLBP INDEPENDENT MATURE MRNA REACTOME DATABASE ID RELEASE 71 159227	16	-0.367303	-1.18609	0.247505	0.518084
TRANSPORT OF VIRUS GOBP GO:0046794	23	-0.331932	-1.18428	0.217565	0.520638
NON-CODING RNA METABOLISM REACTOME DATABASE ID RELEASE 71 194441	18	-0.357211	-1.18353	0.236264	0.520426
CHEMICAL HOMEOSTASIS GOBP GO:0048878	65	-0.257931	-1.18295	0.17148	0.51987
CELLULAR DEVELOPMENTAL PROCESS GOBP GO:0048869	221	-0.212474	-1.18292	0.151724	0.517893
CELL PART MORPHOGENESIS GOBP GO:0032990	36	-0.2977	-1.1828	0.203065	0.516151
SRP-DEPENDENT COTRANSLATIONAL PROTEIN TARGETING TO MEMBRANE GOBP GO:0006614	34	-0.309839	-1.18216	0.242701	0.515611
CELL DIFFERENTIATION GOBP GO:0030154	209	-0.212514	-1.18031	0.124074	0.518124
HALLMARK_BILE_ACID_METABOLISM MSIGDB_C2 HALLMARK_BILE_ACID_METABOLISM	16	-0.358556	-1.17719	0.256554	0.523652
EXPORT OF VIRAL RIBONUCLEOPROTEINS FROM NUCLEUS REACTOME DATABASE ID RELEASE 71 168274	17	-0.357102	-1.17576	0.226908	0.525072
LEUKOCYTE MIGRATION GOBP GO:0050900	23	-0.329	-1.17455	0.225508	0.525973
ESTABLISHMENT OF PROTEIN LOCALIZATION TO ENDOPLASMIC RETICULUM GOBP GO:0072599	37	-0.295755	-1.17404	0.229391	0.525218
CITRATE METABOLIC PROCESS GOBP GO:0006101	21	-0.333804	-1.17075	0.256214	0.531329
NUCLEAR IMPORT OF REV PROTEIN REACTOME R-HSA-180746.1	19	-0.352382	-1.17019	0.23855	0.530621
HOST INTERACTIONS WITH INFLUENZA FACTORS REACTOME R-HSA-168253.4	18	-0.354114	-1.16929	0.250497	0.530733
TRANSPORT OF THE SLBP DEPENDANT MATURE MRNA REACTOME DATABASE ID RELEASE 71 159230	16	-0.367303	-1.16861	0.263359	0.530457
GENE SILENCING BY RNA REACTOME DATABASE ID RELEASE 71 211000	21	-0.337368	-1.16658	0.25	0.533551
NEP NS2 INTERACTS WITH THE CELLULAR EXPORT MACHINERY REACTOME R-HSA-168333.3	17	-0.357102	-1.1664	0.257198	0.532005
PURINE RIBONUCLEOTIDE METABOLIC PROCESS GOBP GO:0009150	82	-0.240449	-1.16478	0.196998	0.533933
TRICARBOXYLIC ACID CYCLE GOBP GO:0006099	21	-0.333804	-1.16302	0.242188	0.536183
TRANSCRIPTIONAL REGULATION BY SMALL RNAS REACTOME DATABASE ID RELEASE 71 5578749	19	-0.345106	-1.16124	0.264432	0.538656
REGULATION OF GLUCOKINASE BY GLUCOKINASE REGULATORY PROTEIN REACTOME R-HSA-170822.3	16	-0.367303	-1.16111	0.257143	0.536923
NUCLEAR PORE COMPLEX (NPC) DISASSEMBLY REACTOME DATABASE ID RELEASE 71 3301854	16	-0.367303	-1.15766	0.278788	0.543484
HALLMARK_APOPTOSIS MSIGDB_C2 HALLMARK_APOPTOSIS	34	-0.293215	-1.15639	0.24581	0.544654
MULTI-ORGANISM LOCALIZATION GOBP GO:1902579	25	-0.316302	-1.15435	0.262042	0.547784
TRANSPORT OF RIBONUCLEOPROTEINS INTO THE HOST NUCLEUS REACTOME R-HSA-168271.3	17	-0.359965	-1.15282	0.273973	0.54948
REGULATION OF POSTTRANSCRIPTIONAL GENE SILENCING GOBP GO:0060147	22	-0.330873	-1.1516	0.283554	0.550521
FCGAMMA RECEPTOR (FCGR) DEPENDENT PHAGOCYTOSIS REACTOME R-HSA-2029480.1	21	-0.336805	-1.151	0.242485	0.549976
VIRAL MESSENGER RNA SYNTHESIS REACTOME R-HSA-168325.4	18	-0.354927	-1.15071	0.271028	0.548758
DEFECTIVE TPR MAY CONFER SUSCEPTIBILITY TOWARDS THYROID PAPILLARY CARCINOMA (TPC) REACTOME DATABASE ID RELEASE 71 5619107	16	-0.367303	-1.14941	0.286822	0.549958
REGULATION OF GENE SILENCING BY RNA GOBP GO:0060966	22	-0.330873	-1.14849	0.26839	0.550329
MESENCHYME DEVELOPMENT GOBP GO:0060485	15	-0.380553	-1.14781	0.260618	0.550004
NS1 MEDIATED EFFECTS ON HOST PATHWAYS REACTOME R-HSA-168276.5	18	-0.354114	-1.14683	0.256121	0.550488
TRICARBOXYLIC ACID METABOLIC PROCESS GOBP GO:0072350	23	-0.3239	-1.1432	0.281124	0.557205
REGULATION OF GENE SILENCING BY MIRNA GOBP GO:0060964	22	-0.330873	-1.14192	0.28215	0.558411
ENZYME LINKED RECEPTOR PROTEIN SIGNALING PATHWAY GOBP GO:0007167	67	-0.246735	-1.14113	0.252768	0.558482
REGULATION OF CELL DEVELOPMENT GOBP GO:0060284	57	-0.26164	-1.1405	0.259669	0.558186
REGULATION OF CELLULAR KETONE METABOLIC PROCESS GOBP GO:0010565	35	-0.291218	-1.13971	0.254403	0.558248
MULTI-ORGANISM TRANSPORT GOBP GO:0044766	25	-0.316302	-1.13948	0.289855	0.556807
MHC CLASS II ANTIGEN PRESENTATION REACTOME DATABASE ID RELEASE 71 2132295	22	-0.325061	-1.13892	0.292829	0.556226
TRANSPORT OF MATURE MRNAS DERIVED FROM INTRONLESS TRANSCRIPTS REACTOME DATABASE ID RELEASE 71 159234	16	-0.367303	-1.13876	0.270751	0.554697
TRANSPORT OF MATURE MRNA DERIVED FROM AN INTRONLESS TRANSCRIPT REACTOME R-HSA-159231.2	16	-0.367303	-1.13496	0.297872	0.562356
FORMATION OF A POOL OF FREE 40S SUBUNITS REACTOME DATABASE ID RELEASE 71 72689	36	-0.285503	-1.13233	0.259857	0.567195
INTRACELLULAR PROTEIN TRANSPORT GOBP GO:0006886	156	-0.214151	-1.13186	0.203152	0.566576
REGULATION OF CELL MIGRATION GOBP GO:0030334	80	-0.236041	-1.13179	0.252319	0.564845
CELL MORPHOGENESIS INVOLVED IN DIFFERENTIATION GOBP GO:0000904	40	-0.278441	-1.12797	0.280079	0.572333
ENDOSOMAL TRANSPORT GOBP GO:0016197	28	-0.30388	-1.12519	0.283203	0.577431
AXONOGENESIS GOBP GO:0007409	23	-0.321994	-1.12409	0.284091	0.578254
PROTEIN TARGETING TO ER GOBP GO:0045047	36	-0.282095	-1.12225	0.304189	0.580911
NEGATIVE REGULATION OF MRNA METABOLIC PROCESS GOBP GO:1903312	17	-0.335726	-1.12099	0.287402	0.582283
CELLULAR RESPONSE TO LIPID GOBP GO:0071396	29	-0.295461	-1.12087	0.263258	0.580638
HALLMARK_UV_RESPONSE_DN MSIGDB_C2 HALLMARK_UV_RESPONSE_DN	28	-0.300907	-1.11751	0.302419	0.587298
RRNA PROCESSING REACTOME DATABASE ID RELEASE 71 72312	37	-0.278667	-1.11715	0.294455	0.58628
CELLULAR MACROMOLECULE LOCALIZATION GOBP GO:0070727	210	-0.201261	-1.11582	0.223404	0.587797
HALLMARK_ADIPOGENESIS MSIGDB_C2 HALLMARK_ADIPOGENESIS	52	-0.257138	-1.1151	0.297398	0.587756
REGULATION OF CELL-CELL ADHESION GOBP GO:0022407	23	-0.310783	-1.11225	0.310476	0.59299
DEVELOPMENTAL BIOLOGY REACTOME R-HSA-1266738.5	150	-0.208476	-1.11213	0.219885	0.591366
MAJOR PATHWAY OF RRNA PROCESSING IN THE NUCLEOLUS AND CYTOSOL REACTOME R-HSA-6791226.3	34	-0.2795	-1.11135	0.307393	0.591534
AXON DEVELOPMENT GOBP GO:0061564	27	-0.301129	-1.11077	0.320789	0.591059
OXIDATION-REDUCTION PROCESS GOBP GO:0055114	121	-0.215949	-1.1083	0.258687	0.595501
ER TO GOLGI VESICLE-MEDIATED TRANSPORT GOBP GO:0006888	33	-0.281841	-1.10592	0.335849	0.599491
PI3K-AKT SIGNALING PATHWAY WIKIPATHWAYS_20191210 WP4172 HOMO SAPIENS	36	-0.279417	-1.105	0.314885	0.599807
CELL MORPHOGENESIS GOBP GO:0000902	53	-0.257271	-1.10295	0.306818	0.603055
METABOLISM OF LIPIDS REACTOME R-HSA-556833.7	73	-0.237454	-1.10147	0.262082	0.605195
REGULATION OF CARBOHYDRATE METABOLIC PROCESS GOBP GO:0006109	31	-0.296117	-1.10099	0.321932	0.604503
AMIDE BIOSYNTHETIC PROCESS GOBP GO:0043604	85	-0.229704	-1.09875	0.283333	0.608306
RIBONUCLEOTIDE METABOLIC PROCESS GOBP GO:0009259	83	-0.230861	-1.09871	0.286267	0.606492
REGULATION OF CELL MOTILITY GOBP GO:2000145	84	-0.229013	-1.09761	0.30303	0.60752
REGULATION OF OXIDOREDUCTASE ACTIVITY GOBP GO:0051341	16	-0.353734	-1.09653	0.333988	0.608293
TISSUE HOMEOSTASIS GOBP GO:0001894	15	-0.347958	-1.09453	0.344196	0.611633
CELLULAR RESPONSE TO ENDOGENOUS STIMULUS GOBP GO:0071495	77	-0.23068	-1.09432	0.279773	0.610205
CELLULAR PROTEIN LOCALIZATION GOBP GO:0034613	210	-0.201261	-1.09202	0.267581	0.614251
CILIARY LANDSCAPE WIKIPATHWAYS_20191210 WP4352 HOMO SAPIENS	31	-0.284387	-1.09118	0.327032	0.614579
REGULATION OF CELL MORPHOGENESIS INVOLVED IN DIFFERENTIATION GOBP GO:0010769	30	-0.286908	-1.09017	0.3125	0.615231
SIGNALING EVENTS MEDIATED BY VEGFR1 AND VEGFR2 PATHWAY INTERACTION DATABASE NCI-NATURE CURATED DATA SIGNALING EVENTS MEDIATED BY VEGFR1 AND VEGFR2	16	-0.343502	-1.08944	0.336484	0.615147
VIRAL MRNA TRANSLATION REACTOME DATABASE ID RELEASE 71 192823	32	-0.279808	-1.08753	0.314176	0.618018
DIVALENT INORGANIC CATION HOMEOSTASIS GOBP GO:0072507	22	-0.316915	-1.08685	0.33004	0.617885
HALLMARK_UV_RESPONSE_UP MSIGDB_C2 HALLMARK_UV_RESPONSE_UP	31	-0.283916	-1.08654	0.350775	0.616786
MUSCLE CELL DIFFERENTIATION GOBP GO:0042692	15	-0.353203	-1.08234	0.346591	0.625961
ENDOMEMBRANE SYSTEM ORGANIZATION GOBP GO:0010256	43	-0.258724	-1.08183	0.320537	0.625405
ESR-MEDIATED SIGNALING REACTOME R-HSA-8939211.2	19	-0.324034	-1.0812	0.337812	0.625114
CYTOPLASMIC RIBOSOMAL PROTEINS WIKIPATHWAYS_20191210 WP477 HOMO SAPIENS	32	-0.279808	-1.07942	0.343558	0.627894
CYTOSKELETAL REGULATION BY RHO GTPASE PANTHER PATHWAY P00016	31	-0.280815	-1.07917	0.341223	0.62662
NUCLEAR ENVELOPE BREAKDOWN REACTOME R-HSA-2980766.2	17	-0.337059	-1.07882	0.3663	0.625644
REGULATION OF LOCOMOTION GOBP GO:0040012	88	-0.224602	-1.07561	0.330798	0.632302
ORGANELLE ORGANIZATION GOBP GO:0006996	359	-0.181054	-1.07427	0.255738	0.633849
RESPONSE OF EIF2AK4 (GCN2) TO AMINO ACID DEFICIENCY REACTOME DATABASE ID RELEASE 71 9633012	34	-0.275406	-1.07074	0.364356	0.641132
CELLULAR RESPONSE TO HORMONE STIMULUS GOBP GO:0032870	37	-0.267657	-1.07069	0.345603	0.639366
SELENOCYSTEINE SYNTHESIS REACTOME DATABASE ID RELEASE 71 2408557	32	-0.279808	-1.06725	0.367619	0.646199
OPIOID SIGNALLING REACTOME R-HSA-111885.1	15	-0.342945	-1.06398	0.37747	0.652794
HALLMARK_MITOTIC_SPINDLE MSIGDB_C2 HALLMARK_MITOTIC_SPINDLE	33	-0.270442	-1.06166	0.366089	0.657196
CALCIUM REGULATION IN THE CARDIAC CELL WIKIPATHWAYS_20191210 WP536 HOMO SAPIENS	17	-0.325449	-1.0568	0.385859	0.668327
PROTEIN FOLDING REACTOME R-HSA-391251.1	25	-0.289391	-1.05619	0.352601	0.66798
SUMO E3 LIGASES SUMOYLATE TARGET PROTEINS REACTOME R-HSA-3108232.5	29	-0.27821	-1.05618	0.36381	0.666069
VESICLE BUDDING FROM MEMBRANE GOBP GO:0006900	21	-0.303524	-1.05422	0.355422	0.669261
CELLULAR AMIDE METABOLIC PROCESS GOBP GO:0043603	130	-0.203923	-1.05324	0.340037	0.669882
REV-MEDIATED NUCLEAR EXPORT OF HIV RNA REACTOME DATABASE ID RELEASE 71 165054	19	-0.306993	-1.04676	0.401247	0.685691
REGULATION OF PURINE NUCLEOTIDE METABOLIC PROCESS GOBP GO:1900542	34	-0.264792	-1.04342	0.390533	0.692782
IMMUNE RESPONSE-REGULATING CELL SURFACE RECEPTOR SIGNALING PATHWAY INVOLVED IN PHAGOCYTOSIS GOBP GO:0002433	18	-0.311151	-1.04249	0.403846	0.693201
ANIMAL ORGAN MORPHOGENESIS GOBP GO:0009887	39	-0.262085	-1.04186	0.401544	0.692916
PID_VEGFR1_2_PATHWAY MSIGDB_C2 PID_VEGFR1_2_PATHWAY	15	-0.337559	-1.04042	0.398438	0.694897
NEGATIVE REGULATION OF INTRINSIC APOPTOTIC SIGNALING PATHWAY GOBP GO:2001243	15	-0.335456	-1.03963	0.396078	0.695014
MULTICELLULAR ORGANISMAL HOMEOSTASIS GOBP GO:0048871	22	-0.300318	-1.0378	0.394231	0.697957
SUMOYLATION OF CHROMATIN ORGANIZATION PROTEINS REACTOME DATABASE ID RELEASE 71 4551638	20	-0.302901	-1.03711	0.42885	0.697849
RETROGRADE VESICLE-MEDIATED TRANSPORT, GOLGI TO ER GOBP GO:0006890	15	-0.333303	-1.03513	0.390658	0.701139
TRANSMEMBRANE TRANSPORT GOBP GO:0055085	63	-0.225837	-1.0325	0.377609	0.706076
SUMOYLATION OF UBIQUITINYLATION PROTEINS REACTOME R-HSA-3232142.3	17	-0.312688	-1.02966	0.404943	0.711789
FC-GAMMA RECEPTOR SIGNALING PATHWAY INVOLVED IN PHAGOCYTOSIS GOBP GO:0038096	18	-0.311151	-1.02809	0.393411	0.714018
ANTIGEN PROCESSING AND PRESENTATION OF EXOGENOUS PEPTIDE ANTIGEN VIA MHC CLASS II GOBP GO:0019886	20	-0.300909	-1.02746	0.403475	0.713719
TRNA-CONTAINING RIBONUCLEOPROTEIN COMPLEX EXPORT FROM NUCLEUS GOBP GO:0071431	19	-0.306846	-1.0274	0.412229	0.711865
TRNA TRANSPORT GOBP GO:0051031	19	-0.306846	-1.02731	0.401235	0.710147
CARBOXYLIC ACID CATABOLIC PROCESS GOBP GO:0046395	63	-0.22793	-1.02632	0.407767	0.71096
PROTEIN TARGETING GOBP GO:0006605	75	-0.219056	-1.02281	0.419048	0.718711
PLASMA MEMBRANE BOUNDED CELL PROJECTION MORPHOGENESIS GOBP GO:0120039	33	-0.264111	-1.02242	0.422222	0.717745
RESPONSE TO ORGANONITROGEN COMPOUND GOBP GO:0010243	59	-0.229662	-1.02188	0.42329	0.717219
FC-GAMMA RECEPTOR SIGNALING PATHWAY GOBP GO:0038094	18	-0.311151	-1.01902	0.410749	0.722733
RRNA PROCESSING IN THE NUCLEUS AND CYTOSOL REACTOME R-HSA-8868773.3	35	-0.259178	-1.0172	0.423792	0.725848
ORGANIC ACID CATABOLIC PROCESS GOBP GO:0016054	63	-0.22793	-1.01674	0.435754	0.725091
HOMEOSTATIC PROCESS GOBP GO:0042592	111	-0.201096	-1.01518	0.429368	0.727175
CELL PROJECTION MORPHOGENESIS GOBP GO:0048858	33	-0.264111	-1.01384	0.445269	0.728841
SIGNALING BY NTRKS REACTOME DATABASE ID RELEASE 71 166520	16	-0.320088	-1.01381	0.444664	0.726945
SUMOYLATION REACTOME DATABASE ID RELEASE 71 2990846	30	-0.266874	-1.01312	0.444882	0.726887
TRNA EXPORT FROM NUCLEUS GOBP GO:0006409	19	-0.306846	-1.01289	0.427992	0.725528
NCRNA EXPORT FROM NUCLEUS GOBP GO:0097064	20	-0.300428	-1.01092	0.433925	0.728894
FC RECEPTOR MEDIATED STIMULATORY SIGNALING PATHWAY GOBP GO:0002431	18	-0.311151	-1.01016	0.438356	0.729068
ANTIGEN PROCESSING AND PRESENTATION OF PEPTIDE OR POLYSACCHARIDE ANTIGEN VIA MHC CLASS II GOBP GO:0002504	20	-0.300909	-1.00491	0.452158	0.741604
REGULATION OF NUCLEOTIDE METABOLIC PROCESS GOBP GO:0006140	36	-0.253966	-1.00307	0.440154	0.744612
ANTIGEN PROCESSING AND PRESENTATION OF PEPTIDE ANTIGEN VIA MHC CLASS II GOBP GO:0002495	20	-0.300909	-1.00296	0.469062	0.742936
INTERACTIONS OF REV WITH HOST CELLULAR PROTEINS REACTOME R-HSA-177243.2	21	-0.293263	-1.00063	0.458252	0.747432
NEURON PROJECTION MORPHOGENESIS GOBP GO:0048812	33	-0.264111	-0.999823	0.473373	0.747758
REGULATION OF BLOOD CIRCULATION GOBP GO:1903522	17	-0.308593	-0.997775	0.451243	0.751318
REGULATION OF INTRINSIC APOPTOTIC SIGNALING PATHWAY GOBP GO:2001242	27	-0.27408	-0.996257	0.451737	0.753391
MONOCARBOXYLIC ACID METABOLIC PROCESS GOBP GO:0032787	87	-0.205541	-0.994608	0.439446	0.755876
PURINE-CONTAINING COMPOUND METABOLIC PROCESS GOBP GO:0072521	93	-0.204105	-0.994121	0.478102	0.755213
REGULATION OF CELLULAR COMPONENT MOVEMENT GOBP GO:0051270	89	-0.205349	-0.989364	0.453382	0.766244
POSITIVE REGULATION OF NEURON PROJECTION DEVELOPMENT GOBP GO:0010976	17	-0.301882	-0.986767	0.466281	0.771383
GENERATION OF PRECURSOR METABOLITES AND ENERGY GOBP GO:0006091	87	-0.207013	-0.986393	0.465549	0.770356
POSITIVE REGULATION OF ENDOCYTOSIS GOBP GO:0045807	17	-0.303427	-0.985961	0.475728	0.769546
TRNA PROCESSING IN THE NUCLEUS REACTOME DATABASE ID RELEASE 71 6784531	18	-0.301012	-0.978501	0.491262	0.787859
CATION HOMEOSTASIS GOBP GO:0055080	47	-0.229504	-0.978323	0.488679	0.786282
REGULATION OF HEART CONTRACTION GOBP GO:0008016	17	-0.308593	-0.97679	0.471349	0.788461
PURINE NUCLEOTIDE METABOLIC PROCESS GOBP GO:0006163	89	-0.202566	-0.973539	0.510516	0.795241
INTRA-GOLGI AND RETROGRADE GOLGI-TO-ER TRAFFIC REACTOME DATABASE ID RELEASE 71 6811442	31	-0.256606	-0.972667	0.515038	0.795639
REGULATION OF MUSCLE SYSTEM PROCESS GOBP GO:0090257	24	-0.269184	-0.969935	0.47412	0.801143
MUSCLE ORGAN DEVELOPMENT GOBP GO:0007517	15	-0.319596	-0.968072	0.474903	0.804123
GLYCOPROTEIN BIOSYNTHETIC PROCESS GOBP GO:0009101	15	-0.312795	-0.967725	0.506494	0.803049
ION HOMEOSTASIS GOBP GO:0050801	51	-0.224317	-0.96582	0.513026	0.806189
DICARBOXYLIC ACID METABOLIC PROCESS GOBP GO:0043648	25	-0.266799	-0.96433	0.506224	0.80824
INTRACELLULAR TRANSPORT OF VIRUS GOBP GO:0075733	22	-0.276617	-0.962908	0.520958	0.809922
EUKARYOTIC TRANSLATION INITIATION REACTOME DATABASE ID RELEASE 71 72613	43	-0.230449	-0.961694	0.513208	0.811116
GTP HYDROLYSIS AND JOINING OF THE 60S RIBOSOMAL SUBUNIT REACTOME R-HSA-72706.2	42	-0.233917	-0.961305	0.504604	0.810171
CELLULAR COMPONENT BIOGENESIS GOBP GO:0044085	279	-0.166272	-0.960929	0.544803	0.809215
AXON GUIDANCE REACTOME DATABASE ID RELEASE 71 422475	122	-0.190216	-0.960874	0.524237	0.807307
REGULATION OF ANATOMICAL STRUCTURE MORPHOGENESIS GOBP GO:0022603	107	-0.192566	-0.960717	0.536862	0.805664
VIRAL GENE EXPRESSION GOBP GO:0019080	56	-0.217178	-0.957661	0.528757	0.811832
INORGANIC ION HOMEOSTASIS GOBP GO:0098771	47	-0.229504	-0.957491	0.54049	0.810363
HALLMARK_UNFOLDED_PROTEIN_RESPONSE MSIGDB_C2 HALLMARK_UNFOLDED_PROTEIN_RESPONSE	27	-0.256313	-0.957347	0.529293	0.808719
CELLULAR COMPONENT ASSEMBLY GOBP GO:0022607	265	-0.166718	-0.95462	0.577281	0.814022
REGULATION OF BODY FLUID LEVELS GOBP GO:0050878	39	-0.242967	-0.954336	0.532934	0.812774
IMPORT INTO NUCLEUS GOBP GO:0051170	21	-0.280387	-0.952377	0.501953	0.816051
RESPONSE TO ABIOTIC STIMULUS GOBP GO:0009628	94	-0.191633	-0.950118	0.545287	0.820105
CELLULAR RESPONSE TO ORGANONITROGEN COMPOUND GOBP GO:0071417	40	-0.232658	-0.949887	0.54845	0.818686
BIOCARTA_RHO_PATHWAY MSIGDB_C2 BIOCARTA_RHO_PATHWAY	16	-0.294336	-0.949082	0.528184	0.81884
REGULATION OF GENE SILENCING GOBP GO:0060968	23	-0.266408	-0.948639	0.542	0.818064
HCMV LATE EVENTS REACTOME R-HSA-9610379.1	19	-0.283592	-0.948206	0.528517	0.8172
RESPONSE TO NITROGEN COMPOUND GOBP GO:1901698	63	-0.206208	-0.946862	0.540643	0.818865
RESPONSE TO ENDOPLASMIC RETICULUM STRESS GOBP GO:0034976	40	-0.231251	-0.94666	0.554	0.817412
CELL MORPHOGENESIS INVOLVED IN NEURON DIFFERENTIATION GOBP GO:0048667	26	-0.264896	-0.945747	0.523191	0.817764
HCMV EARLY EVENTS REACTOME DATABASE ID RELEASE 71 9609690	21	-0.272929	-0.945419	0.539806	0.816622
CAP-DEPENDENT TRANSLATION INITIATION REACTOME DATABASE ID RELEASE 71 72737	43	-0.230449	-0.943762	0.53539	0.818978
VIRAL PROCESS GOBP GO:0016032	90	-0.194695	-0.943431	0.586572	0.817976
VIRAL LIFE CYCLE GOBP GO:0019058	40	-0.229192	-0.943153	0.545966	0.816702
TRANSPORT TO THE GOLGI AND SUBSEQUENT MODIFICATION REACTOME DATABASE ID RELEASE 71 948021	30	-0.244734	-0.941425	0.546693	0.819403
NEGATIVE REGULATION OF KINASE ACTIVITY GOBP GO:0033673	21	-0.272207	-0.939355	0.533981	0.822909
RIBONUCLEOSIDE TRIPHOSPHATE METABOLIC PROCESS GOBP GO:0009199	54	-0.213806	-0.939297	0.553232	0.821125
ESTABLISHMENT OF CELL POLARITY GOBP GO:0030010	18	-0.285221	-0.93517	0.53861	0.829732
CARBOHYDRATE DERIVATIVE CATABOLIC PROCESS GOBP GO:1901136	20	-0.271335	-0.934828	0.543321	0.828678
PID_RAC1_PATHWAY MSIGDB_C2 PID_RAC1_PATHWAY	16	-0.294647	-0.931889	0.54049	0.834265
BETA-CATENIN INDEPENDENT WNT SIGNALING REACTOME R-HSA-3858494.3	40	-0.22994	-0.93145	0.572597	0.83344
PURINE RIBONUCLEOSIDE TRIPHOSPHATE METABOLIC PROCESS GOBP GO:0009205	54	-0.213806	-0.930577	0.587273	0.833743
CARBOXYLIC ACID METABOLIC PROCESS GOBP GO:0019752	158	-0.174372	-0.93019	0.649281	0.832809
ANTIGEN PROCESSING AND PRESENTATION GOBP GO:0019882	50	-0.218757	-0.928557	0.580407	0.835023
RAC1 SIGNALING PATHWAY PATHWAY INTERACTION DATABASE NCI-NATURE CURATED DATA RAC1 SIGNALING PATHWAY	16	-0.294647	-0.92823	0.537572	0.833841
REGULATION OF VASCULATURE DEVELOPMENT GOBP GO:1901342	30	-0.242656	-0.923086	0.554493	0.845152
REGULATION OF ANGIOGENESIS GOBP GO:0045765	29	-0.244293	-0.920788	0.583174	0.849029
EMBRYONIC MORPHOGENESIS GOBP GO:0048598	22	-0.26798	-0.920052	0.581262	0.849027
TRANSPORT GOBP GO:0006810	456	-0.151431	-0.916161	0.750452	0.856938
ATP METABOLIC PROCESS GOBP GO:0046034	48	-0.215385	-0.915948	0.613971	0.855505
SIGNALING PATHWAYS REACTOME R-HSA-162582.9	225	-0.163647	-0.915467	0.676106	0.854799
PID_ILK_PATHWAY MSIGDB_C2 PID_ILK_PATHWAY	15	-0.296617	-0.915457	0.558994	0.852876
PROTEIN HOMOOLIGOMERIZATION GOBP GO:0051260	22	-0.26023	-0.914895	0.56926	0.852314
CARBOHYDRATE DERIVATIVE METABOLIC PROCESS GOBP GO:1901135	149	-0.174009	-0.91413	0.667276	0.852223
ER TO GOLGI ANTEROGRADE TRANSPORT REACTOME R-HSA-199977.4	30	-0.244734	-0.913233	0.588349	0.852508
POSITIVE REGULATION OF WNT SIGNALING PATHWAY GOBP GO:0030177	31	-0.238134	-0.912843	0.604563	0.851567
HCMV INFECTION REACTOME R-HSA-9609646.1	24	-0.254671	-0.912104	0.559454	0.851524
POSITIVE REGULATION OF NEUROGENESIS GOBP GO:0050769	23	-0.255707	-0.909257	0.612245	0.856864
PROTEIN IMPORT INTO NUCLEUS GOBP GO:0006606	18	-0.279807	-0.904685	0.574257	0.866351
TRNA PROCESSING REACTOME R-HSA-72306.6	20	-0.268776	-0.898929	0.626223	0.878869
ANTIBIOTIC METABOLIC PROCESS GOBP GO:0016999	37	-0.227794	-0.897045	0.620567	0.881609
ACTIN FILAMENT BUNDLE ASSEMBLY GOBP GO:0051017	15	-0.283977	-0.896288	0.581028	0.88147
APOPTOTIC EXECUTION PHASE REACTOME DATABASE ID RELEASE 71 75153	17	-0.275785	-0.89563	0.599628	0.88112
POSITIVE REGULATION OF NERVOUS SYSTEM DEVELOPMENT GOBP GO:0051962	23	-0.255707	-0.895227	0.597701	0.880165
REGULATION OF GLYCOLYTIC PROCESS GOBP GO:0006110	21	-0.255392	-0.892299	0.590264	0.885628
ASPARAGINE N-LINKED GLYCOSYLATION REACTOME R-HSA-446203.4	46	-0.210413	-0.889167	0.650888	0.891119
RESPONSE TO OXYGEN LEVELS GOBP GO:0070482	45	-0.211594	-0.887849	0.637795	0.892196
CELLULAR RESPONSE TO NITROGEN COMPOUND GOBP GO:1901699	42	-0.215071	-0.885711	0.676983	0.895368
ESTABLISHMENT OF LOCALIZATION GOBP GO:0051234	464	-0.146315	-0.885026	0.797619	0.895068
POSITIVE REGULATION OF CELL-CELL ADHESION GOBP GO:0022409	18	-0.269255	-0.881049	0.614815	0.902581
MUSCLE STRUCTURE DEVELOPMENT GOBP GO:0061061	33	-0.226224	-0.878849	0.639854	0.905912
REGULATION OF BIOLOGICAL QUALITY GOBP GO:0065008	347	-0.148534	-0.876972	0.810105	0.908486
PEPTIDE CHAIN ELONGATION REACTOME R-HSA-156902.2	34	-0.223078	-0.876144	0.619608	0.908429
INTERFERON SIGNALING REACTOME R-HSA-913531.2	28	-0.230974	-0.87534	0.657143	0.908419
GOLGI-TO-ER RETROGRADE TRANSPORT REACTOME R-HSA-8856688.1	24	-0.244436	-0.873338	0.626204	0.911162
ANDROGENRECEPTOR IOB ANDROGENRECEPTOR	29	-0.232166	-0.872446	0.640777	0.911319
REGULATION OF NUCLEOTIDE CATABOLIC PROCESS GOBP GO:0030811	21	-0.255392	-0.871501	0.61523	0.911529
BIOCARTA_INTEGRIN_PATHWAY MSIGDB_C2 BIOCARTA_INTEGRIN_PATHWAY	17	-0.270302	-0.869463	0.619329	0.914456
TRANSPORT OF MATURE TRANSCRIPT TO CYTOPLASM REACTOME DATABASE ID RELEASE 71 72202	24	-0.240923	-0.867967	0.647834	0.915979
ORGANELLE FISSION GOBP GO:0048285	15	-0.2798	-0.86687	0.660118	0.916652
VPR-MEDIATED NUCLEAR IMPORT OF PICS REACTOME DATABASE ID RELEASE 71 180910	19	-0.256628	-0.866514	0.628906	0.915466
CELL PROLIFERATION GOBP GO:0008283	17	-0.265627	-0.866394	0.637681	0.913774
PROTEIN-CONTAINING COMPLEX SUBUNIT ORGANIZATION GOBP GO:0043933	201	-0.156703	-0.865715	0.781145	0.913381
CARGO RECOGNITION FOR CLATHRIN-MEDIATED ENDOCYTOSIS REACTOME R-HSA-8856825.2	27	-0.238854	-0.862647	0.671454	0.918599
TRANSLATION GOBP GO:0006412	69	-0.187466	-0.862121	0.720755	0.917841
REGULATION OF WNT SIGNALING PATHWAY GOBP GO:0030111	47	-0.202045	-0.857486	0.728682	0.926303
ACTIN FILAMENT BUNDLE ORGANIZATION GOBP GO:0061572	15	-0.283977	-0.856076	0.672	0.927454
INTERACTIONS OF VPR WITH HOST CELLULAR PROTEINS REACTOME R-HSA-176033.2	19	-0.256628	-0.855948	0.631263	0.925808
ANTIVIRAL MECHANISM BY IFN-STIMULATED GENES REACTOME R-HSA-1169410.3	25	-0.23615	-0.854469	0.675944	0.927167
RESPONSE TO TOPOLOGICALLY INCORRECT PROTEIN GOBP GO:0035966	40	-0.210929	-0.85312	0.686456	0.928224
VESICLE-MEDIATED TRANSPORT GOBP GO:0016192	259	-0.148569	-0.852706	0.848057	0.92717
PROTEIN LOCALIZATION REACTOME R-HSA-9609507.2	37	-0.213172	-0.851365	0.693182	0.928184
REGULATION OF MRNA PROCESSING GOBP GO:0050684	20	-0.249669	-0.847356	0.669307	0.935174
MITOCHONDRIAL TRANSPORT GOBP GO:0006839	34	-0.216306	-0.846129	0.727612	0.935966
RESPONSE TO ENDOGENOUS STIMULUS GOBP GO:0009719	85	-0.174381	-0.84471	0.770245	0.937131
POSITIVE REGULATION OF PROTEIN LOCALIZATION TO MEMBRANE GOBP GO:1905477	17	-0.267931	-0.843703	0.661626	0.9373
ESTABLISHMENT OF PROTEIN LOCALIZATION TO ORGANELLE GOBP GO:0072594	94	-0.175028	-0.843343	0.782609	0.936088
ISG15 ANTIVIRAL MECHANISM REACTOME DATABASE ID RELEASE 71 1169408	24	-0.235986	-0.841849	0.694291	0.937381
TRANSPORT OF MATURE MRNA DERIVED FROM AN INTRON-CONTAINING TRANSCRIPT REACTOME R-HSA-159236.3	24	-0.240923	-0.841625	0.695572	0.935913
REGULATION OF PROTEIN LOCALIZATION TO MEMBRANE GOBP GO:1905475	29	-0.228807	-0.840994	0.7	0.935267
POSITIVE REGULATION OF NEURON DIFFERENTIATION GOBP GO:0045666	19	-0.244314	-0.840399	0.685083	0.934506
NABA_MATRISOME MSIGDB_C2 NABA_MATRISOME	84	-0.175655	-0.833752	0.792976	0.946515
CELLULAR AMINO ACID BIOSYNTHETIC PROCESS GOBP GO:0008652	18	-0.251272	-0.830747	0.712891	0.950854
REGULATION OF ATP BIOSYNTHETIC PROCESS GOBP GO:2001169	25	-0.234605	-0.829107	0.690519	0.952221
HALLMARK_FATTY_ACID_METABOLISM MSIGDB_C2 HALLMARK_FATTY_ACID_METABOLISM	67	-0.180884	-0.824319	0.79661	0.960085
DRUG METABOLIC PROCESS GOBP GO:0017144	121	-0.161173	-0.821334	0.836625	0.964187
LIPID BIOSYNTHETIC PROCESS GOBP GO:0008610	28	-0.218965	-0.819361	0.729622	0.966095
REGULATION OF HORMONE LEVELS GOBP GO:0010817	18	-0.247478	-0.818373	0.720157	0.966139
GPCR DOWNSTREAM SIGNALLING REACTOME DATABASE ID RELEASE 71 388396	27	-0.220065	-0.817943	0.729367	0.965035
NEGATIVE REGULATION OF PROTEIN PHOSPHORYLATION GOBP GO:0001933	30	-0.223837	-0.817191	0.725338	0.96453
REGULATION OF CELLULAR RESPONSE TO GROWTH FACTOR STIMULUS GOBP GO:0090287	20	-0.243646	-0.812585	0.727273	0.971441
REGULATION OF CARBOHYDRATE CATABOLIC PROCESS GOBP GO:0043470	22	-0.236388	-0.811519	0.72963	0.971563
NEGATIVE REGULATION OF PHOSPHORYLATION GOBP GO:0042326	34	-0.212622	-0.808602	0.767068	0.975059
DISORDERS OF TRANSMEMBRANE TRANSPORTERS REACTOME DATABASE ID RELEASE 71 5619115	41	-0.197913	-0.807677	0.755299	0.974765
POSITIVE REGULATION OF CELL PROJECTION ORGANIZATION GOBP GO:0031346	25	-0.222178	-0.806041	0.753876	0.975824
PROTEIN METABOLIC PROCESS GOBP GO:0019538	387	-0.135202	-0.805313	0.958264	0.975249
G PROTEIN-COUPLED RECEPTOR SIGNALING PATHWAY GOBP GO:0007186	18	-0.244079	-0.80498	0.745283	0.973922
PROTEIN LOCALIZATION TO ORGANELLE GOBP GO:0033365	121	-0.158365	-0.804616	0.881387	0.972682
ESTABLISHMENT OF ORGANELLE LOCALIZATION GOBP GO:0051656	45	-0.190954	-0.802362	0.807252	0.974801
MITOTIC SPINDLE CHECKPOINT REACTOME R-HSA-69618.2	15	-0.253095	-0.801049	0.724008	0.975248
AMPLIFICATION OF SIGNAL FROM UNATTACHED KINETOCHORES VIA A MAD2 INHIBITORY SIGNAL REACTOME R-HSA-141444.2	15	-0.253095	-0.800934	0.75	0.97353
PHAGOCYTOSIS GOBP GO:0006909	34	-0.204093	-0.800452	0.785276	0.972483
NEURON DEVELOPMENT GOBP GO:0048666	52	-0.184123	-0.799855	0.822519	0.971614
PROTEIN LOCALIZATION TO NUCLEUS GOBP GO:0034504	26	-0.21784	-0.79961	0.74856	0.970128
RESOLUTION OF SISTER CHROMATID COHESION REACTOME R-HSA-2500257.1	15	-0.253095	-0.797414	0.728782	0.972213
POSITIVE REGULATION OF CANONICAL WNT SIGNALING PATHWAY GOBP GO:0090263	27	-0.221914	-0.79308	0.775472	0.978084
RESPONSE TO NUTRIENT LEVELS GOBP GO:0031667	15	-0.256041	-0.792523	0.741683	0.977126
ST_INTEGRIN_SIGNALING_PATHWAY MSIGDB_C2 ST_INTEGRIN_SIGNALING_PATHWAY	21	-0.229701	-0.787525	0.778388	0.983914
NEGATIVE REGULATION OF CELL ADHESION GOBP GO:0007162	18	-0.23854	-0.787471	0.74388	0.982098
RESPONSE TO DECREASED OXYGEN LEVELS GOBP GO:0036293	43	-0.190612	-0.786677	0.798903	0.981529
RESPONSE TO HYPOXIA GOBP GO:0001666	43	-0.190612	-0.785858	0.807615	0.980948
EML4 AND NUDC IN MITOTIC SPINDLE FORMATION REACTOME R-HSA-9648025.1	15	-0.253095	-0.782208	0.767535	0.985032
REGULATION OF MUSCLE CONTRACTION GOBP GO:0006937	17	-0.245485	-0.780859	0.798828	0.98537
CELLULAR PROTEIN METABOLIC PROCESS GOBP GO:0044267	349	-0.132424	-0.780205	0.963093	0.984541
PID_CXCR4_PATHWAY MSIGDB_C2 PID_CXCR4_PATHWAY	16	-0.245121	-0.77958	0.768775	0.983596
REGULATION OF ANIMAL ORGAN MORPHOGENESIS GOBP GO:2000027	34	-0.20033	-0.779537	0.793037	0.98177
NEGATIVE REGULATION OF CELLULAR RESPONSE TO GROWTH FACTOR STIMULUS GOBP GO:0090288	15	-0.255149	-0.778328	0.765625	0.981764
REGULATION OF ENDOCYTOSIS GOBP GO:0030100	28	-0.208637	-0.776967	0.770916	0.981998
POSITIVE REGULATION OF CELL DIFFERENTIATION GOBP GO:0045597	62	-0.175546	-0.776606	0.853974	0.98076
SYMBIONT PROCESS GOBP GO:0044403	107	-0.155908	-0.775111	0.891635	0.981231
NABA_ECM_REGULATORS MSIGDB_C2 NABA_ECM_REGULATORS	28	-0.208969	-0.774652	0.79558	0.980063
ORGANELLE LOCALIZATION GOBP GO:0051640	65	-0.171045	-0.77417	0.848708	0.978962
AMPLIFICATION OF SIGNAL FROM THE KINETOCHORES REACTOME R-HSA-141424.2	15	-0.253095	-0.77359	0.786982	0.978007
VACUOLE ORGANIZATION GOBP GO:0007033	15	-0.246522	-0.773532	0.76506	0.976273
ENDOPLASMIC RETICULUM UNFOLDED PROTEIN RESPONSE GOBP GO:0030968	20	-0.231772	-0.77267	0.768627	0.975758
NEGATIVE REGULATION OF CELL MIGRATION GOBP GO:0030336	27	-0.210489	-0.77238	0.802947	0.974356
ALPHA-AMINO ACID CATABOLIC PROCESS GOBP GO:1901606	23	-0.218335	-0.768495	0.801147	0.978492
SIGNALING BY GPCR REACTOME R-HSA-372790.4	30	-0.202457	-0.768116	0.804924	0.977193
SUMOYLATION OF SUMOYLATION PROTEINS REACTOME R-HSA-4085377.3	18	-0.233295	-0.765007	0.768482	0.979944
POSITIVE REGULATION OF DEVELOPMENTAL PROCESS GOBP GO:0051094	86	-0.157793	-0.761918	0.904315	0.982717
PID_CDC42_PATHWAY MSIGDB_C2 PID_CDC42_PATHWAY	22	-0.220112	-0.760797	0.8	0.982452
DEGRADATION OF THE EXTRACELLULAR MATRIX REACTOME R-HSA-1474228.4	18	-0.233297	-0.758251	0.813627	0.984282
POSITIVE REGULATION OF SUPRAMOLECULAR FIBER ORGANIZATION GOBP GO:1902905	33	-0.194312	-0.757531	0.830827	0.98349
RESPONSE TO HORMONE GOBP GO:0009725	44	-0.18193	-0.755241	0.841797	0.984946
NON-CANONICAL WNT SIGNALING PATHWAY GOBP GO:0035567	35	-0.19239	-0.754132	0.789168	0.984716
REGULATION OF IMMUNE EFFECTOR PROCESS GOBP GO:0002697	18	-0.226119	-0.749293	0.798851	0.989462
CDC42 SIGNALING EVENTS PATHWAY INTERACTION DATABASE NCI-NATURE CURATED DATA CDC42 SIGNALING EVENTS	22	-0.220112	-0.749134	0.82491	0.987833
NEGATIVE REGULATION OF CELLULAR COMPONENT MOVEMENT GOBP GO:0051271	30	-0.196288	-0.743439	0.828	0.993644
MRNA EXPORT FROM NUCLEUS GOBP GO:0006406	29	-0.197607	-0.743421	0.852336	0.991852
ANTIGEN PROCESSING AND PRESENTATION OF PEPTIDE ANTIGEN GOBP GO:0048002	47	-0.175232	-0.743078	0.874759	0.990495
MRNA TRANSPORT GOBP GO:0051028	29	-0.197607	-0.738245	0.871744	0.994756
PROTEIN-CONTAINING COMPLEX ASSEMBLY GOBP GO:0065003	163	-0.137496	-0.737923	0.956835	0.993367
MRNA-CONTAINING RIBONUCLEOPROTEIN COMPLEX EXPORT FROM NUCLEUS GOBP GO:0071427	29	-0.197607	-0.737538	0.848429	0.992069
UNFOLDED PROTEIN RESPONSE (UPR) REACTOME DATABASE ID RELEASE 71 381119	21	-0.210747	-0.736883	0.84	0.991062
CELLULAR RESPONSE TO DRUG GOBP GO:0035690	21	-0.213942	-0.73599	0.830116	0.990353
RNA CATABOLIC PROCESS GOBP GO:0006401	56	-0.16546	-0.735777	0.881092	0.988823
SECOND-MESSENGER-MEDIATED SIGNALING GOBP GO:0019932	15	-0.2369	-0.732842	0.795678	0.990573
NEGATIVE REGULATION OF LOCOMOTION GOBP GO:0040013	28	-0.197168	-0.732251	0.864271	0.989541
SIGNALING BY WNT REACTOME R-HSA-195721.5	55	-0.166125	-0.728948	0.899431	0.991599
CHAPERONE-MEDIATED PROTEIN FOLDING GOBP GO:0061077	18	-0.222098	-0.723664	0.843373	0.995916
NUCLEAR-TRANSCRIBED MRNA CATABOLIC PROCESS GOBP GO:0000956	50	-0.167065	-0.719068	0.91635	0.99931
RESPONSE TO UNFOLDED PROTEIN GOBP GO:0006986	38	-0.181272	-0.718892	0.881701	0.997698
NEGATIVE REGULATION OF RNA METABOLIC PROCESS GOBP GO:0051253	71	-0.155818	-0.717828	0.922465	0.997076
NEGATIVE REGULATION OF CELL MOTILITY GOBP GO:2000146	28	-0.197168	-0.715533	0.874494	0.997916
REGULATION OF DNA BIOSYNTHETIC PROCESS GOBP GO:2000278	16	-0.220975	-0.713776	0.848861	0.998102
NUCLEOCYTOPLASMIC TRANSPORT GOBP GO:0006913	43	-0.1696	-0.713088	0.905968	0.997086
REGULATION OF ACTIN FILAMENT BUNDLE ASSEMBLY GOBP GO:0032231	18	-0.219053	-0.712535	0.878846	0.995944
MULTI-ORGANISM REPRODUCTIVE PROCESS GOBP GO:0044703	15	-0.225538	-0.71056	0.883436	0.996305
METABOLISM OF PROTEINS REACTOME DATABASE ID RELEASE 71 392499	294	-0.121529	-0.704914	0.991694	1
CHEMOTAXIS GOBP GO:0006935	23	-0.198654	-0.703796	0.87574	0.999669
REGULATION OF CANONICAL WNT SIGNALING PATHWAY GOBP GO:0060828	39	-0.172975	-0.703556	0.92	0.998115
PROTEIN COMPLEX OLIGOMERIZATION GOBP GO:0051259	27	-0.190676	-0.700673	0.882569	0.99927
PEPTIDE BIOSYNTHETIC PROCESS GOBP GO:0043043	74	-0.149623	-0.696307	0.968284	1
NEGATIVE REGULATION OF TRANSCRIPTION, DNA-TEMPLATED GOBP GO:0045892	55	-0.158666	-0.695293	0.940695	1
PROTEIN IMPORT GOBP GO:0017038	26	-0.191464	-0.69432	0.892308	1
COPI-MEDIATED ANTEROGRADE TRANSPORT REACTOME DATABASE ID RELEASE 71 6807878	24	-0.191553	-0.691952	0.878193	1
VACUOLAR TRANSPORT GOBP GO:0007034	16	-0.220293	-0.689734	0.863905	1
NEGATIVE REGULATION OF NUCLEIC ACID-TEMPLATED TRANSCRIPTION GOBP GO:1903507	56	-0.155029	-0.6865	0.949904	1
TAXIS GOBP GO:0042330	23	-0.198654	-0.686487	0.872958	1
ESTABLISHMENT OR MAINTENANCE OF CELL POLARITY GOBP GO:0007163	28	-0.185826	-0.684271	0.900763	1
MRNA CATABOLIC PROCESS GOBP GO:0006402	52	-0.157668	-0.683913	0.939114	0.999034
NEGATIVE REGULATION OF RNA BIOSYNTHETIC PROCESS GOBP GO:1902679	56	-0.155029	-0.682092	0.949907	0.998828
MACROAUTOPHAGY GOBP GO:0016236	17	-0.214583	-0.681523	0.879473	0.997602
SKELETAL SYSTEM DEVELOPMENT GOBP GO:0001501	26	-0.187783	-0.680644	0.902804	0.996692
NUCLEAR EXPORT GOBP GO:0051168	37	-0.168604	-0.679666	0.932302	0.995713
MITOTIC PROPHASE REACTOME DATABASE ID RELEASE 71 68875	27	-0.181486	-0.677743	0.903733	0.995563
INTERSPECIES INTERACTION BETWEEN ORGANISMS GOBP GO:0044419	108	-0.134889	-0.676372	0.973262	0.994898
PROTEIN-CONTAINING COMPLEX LOCALIZATION GOBP GO:0031503	40	-0.163148	-0.668523	0.943715	0.99936
CELL DIVISION GOBP GO:0051301	19	-0.20232	-0.666022	0.892393	0.999487
CELLULAR PROTEIN-CONTAINING COMPLEX ASSEMBLY GOBP GO:0034622	108	-0.132477	-0.6525	0.984466	1
ANTIGEN PROCESSING AND PRESENTATION OF EXOGENOUS PEPTIDE ANTIGEN GOBP GO:0002478	46	-0.152854	-0.649684	0.96374	1
NEGATIVE REGULATION OF DEVELOPMENTAL PROCESS GOBP GO:0051093	57	-0.145784	-0.645579	0.971591	1
RHO GTPASES ACTIVATE FORMINS REACTOME DATABASE ID RELEASE 71 5663220	23	-0.182458	-0.644934	0.931507	1
REPRODUCTIVE PROCESS GOBP GO:0022414	22	-0.185215	-0.642714	0.947573	1
ANTIGEN PROCESSING AND PRESENTATION OF EXOGENOUS ANTIGEN GOBP GO:0019884	46	-0.152854	-0.642297	0.945386	1
G ALPHA (I) SIGNALLING EVENTS REACTOME R-HSA-418594.5	23	-0.182131	-0.641115	0.92471	1
REPRODUCTION GOBP GO:0000003	22	-0.185215	-0.638789	0.947266	1
PROCESS UTILIZING AUTOPHAGIC MECHANISM GOBP GO:0061919	22	-0.178538	-0.634151	0.927734	1
RNA LOCALIZATION GOBP GO:0006403	40	-0.1548	-0.627303	0.959108	1
AUTOPHAGY GOBP GO:0006914	22	-0.178538	-0.624003	0.94518	1
PROCESSING OF CAPPED INTRON-CONTAINING PRE-MRNA REACTOME R-HSA-72203.3	62	-0.135102	-0.619156	0.992606	1
NEGATIVE REGULATION OF GENE EXPRESSION GOBP GO:0010629	141	-0.11575	-0.613375	1	1
PROTEIN EXPORT FROM NUCLEUS GOBP GO:0006611	35	-0.155385	-0.606572	0.965517	1
MRNA PROCESSING WIKIPATHWAYS_20191210 WP411 HOMO SAPIENS	30	-0.162331	-0.604578	0.975048	1
REGULATION OF ACTOMYOSIN STRUCTURE ORGANIZATION GOBP GO:0110020	15	-0.195088	-0.596208	0.950287	1
INTEGRIN-MEDIATED CELL ADHESION WIKIPATHWAYS_20191210 WP185 HOMO SAPIENS	20	-0.174233	-0.594247	0.933468	1
REGULATION OF STRESS FIBER ASSEMBLY GOBP GO:0051492	15	-0.195088	-0.593879	0.948718	1
MRNA METABOLIC PROCESS GOBP GO:0016071	106	-0.120244	-0.590778	0.998175	1
REGULATION OF CELL SHAPE GOBP GO:0008360	15	-0.191884	-0.589726	0.964427	1
NUCLEAR TRANSPORT GOBP GO:0051169	46	-0.135628	-0.575253	0.991023	1
RIBONUCLEOPROTEIN COMPLEX LOCALIZATION GOBP GO:0071166	33	-0.143501	-0.568315	0.98482	1
RNA EXPORT FROM NUCLEUS GOBP GO:0006405	34	-0.14463	-0.565924	0.986768	1
ESTABLISHMENT OF RNA LOCALIZATION GOBP GO:0051236	36	-0.140116	-0.555699	0.992439	1
NUCLEIC ACID TRANSPORT GOBP GO:0050657	36	-0.140116	-0.554085	0.984032	1
PROTEIN STABILIZATION GOBP GO:0050821	41	-0.135052	-0.55373	0.996241	1
NUCLEOBASE-CONTAINING COMPOUND TRANSPORT GOBP GO:0015931	36	-0.140116	-0.553027	0.992523	1
RIBONUCLEOPROTEIN COMPLEX EXPORT FROM NUCLEUS GOBP GO:0071426	33	-0.143501	-0.552366	0.981343	1
RNA TRANSPORT GOBP GO:0050658	36	-0.140116	-0.552062	0.986248	1
MRNA PROCESSING GOBP GO:0006397	60	-0.118685	-0.531828	0.998103	1
RNA SPLICING, VIA TRANSESTERIFICATION REACTIONS GOBP GO:0000375	55	-0.119593	-0.529741	0.998095	1
RNA SPLICING, VIA TRANSESTERIFICATION REACTIONS WITH BULGED ADENOSINE AS NUCLEOPHILE GOBP GO:0000377	54	-0.118031	-0.514237	1	1
MRNA SPLICING, VIA SPLICEOSOME GOBP GO:0000398	54	-0.118031	-0.510974	1	1
NEGATIVE REGULATION OF TRANSLATION GOBP GO:0017148	16	-0.147336	-0.476653	0.994297	1
POSITIVE REGULATION OF CYTOSKELETON ORGANIZATION GOBP GO:0051495	36	-0.117533	-0.463206	0.997996	1
RNA 3'-END PROCESSING GOBP GO:0031123	15	-0.136235	-0.417214	1	1
PRE-MRNA SPLICING REACTOME R-HSA-72163.2	42	-0.097968	-0.401825	1	1
MRNA SPLICING REACTOME R-HSA-72172.3	42	-0.097968	-0.400649	1	1
NEGATIVE REGULATION OF CELLULAR AMIDE METABOLIC PROCESS GOBP GO:0034249	17	-0.113746	-0.362452	1	0.999951
