# Supplementary material for: Multi-omic analysis of bat versus human fibroblasts reveals altered central metabolism
Source: eLife. 2024 Jul 22;13:e94007. doi: 10.7554/eLife.94007 (PMC11262796; doi:10.7554/eLife.94007)
Supplement: Supplementary file 6. — GSEA was performed on the proteomics data using protein abundances as input. The table below lists the pathways detected as upregulated in WI-38 cells (compared to PaLung cells) and associated enrichment metrics. [file elife-94007-supp6.xlsx]

## Sheet: Index
Title	Multi-omic analysis of bat versus human fibroblasts reveals altered central metabolism
Authors	N. Suhas Jagannathan, Javier Yu Peng Koh, Younghwan Lee, Radoslaw M Sobota, Aaron Irving, Lin-Fa Wang, Yoko Itahana, Koji Itahana, Lisa Tucker-Kellogg
Supplementary Table No.	Supplementary Table 6
Supplementary Table Title	Biological pathways upregulated in WI-38 cells from Gene Set Enrichment Analysis of Proteomics data
Description	GSEA was performed on the Proteomics data using protein abundances as input. The table below lists the pathways detected as upregulated in WI-38 cells (compared to PaLung cells) and associated enrichment metrics
Column header	Contents
NAME	Name of Gene Set/Pathway
SIZE	Number of genes in gene set/pathway
ES	Enrichment Score from GSEA
NES	Normalized enrichment score from GSEA
NOM p-val	p value computed from GSEA
FDR q-val	FDR corrected p-values obtained from GSEA

## Sheet: Supp_Table_6_GSEA_Proteomics_WI
NAME	SIZE	ES	NES	NOM p-val	FDR q-val
HALLMARK_REACTIVE_OXIGEN_SPECIES_PATHWAY MSIGDB_C2 HALLMARK_REACTIVE_OXIGEN_SPECIES_PATHWAY	17	0.68312	2.2492	0	0.0169019
RESPONSE TO TOXIC SUBSTANCE GOBP GO:0009636	29	0.577394	2.20857	0.00205339	0.0201684
NRF2 PATHWAY WIKIPATHWAYS_20191210 WP2884 HOMO SAPIENS	19	0.652391	2.17478	0	0.0200294
DNA REPAIR REACTOME R-HSA-73894.3	29	0.572921	2.15405	0	0.0199061
PHASE II - CONJUGATION OF COMPOUNDS REACTOME R-HSA-156580.2	19	0.628363	2.12025	0	0.0247384
DNA REPAIR GOBP GO:0006281	33	0.52059	2.08408	0	0.0324093
NUCLEOTIDE EXCISION REPAIR REACTOME DATABASE ID RELEASE 71 5696398	22	0.580159	2.07056	0	0.0339267
REGULATION OF I-KAPPAB KINASE/NF-KAPPAB SIGNALING GOBP GO:0043122	25	0.566363	2.05817	0	0.0347476
NUCLEAR RECEPTORS META-PATHWAY WIKIPATHWAYS_20191210 WP2882 HOMO SAPIENS	32	0.52242	2.05372	0	0.0316091
PATHWAYS IN CLEAR CELL RENAL CELL CARCINOMA WIKIPATHWAYS_20191210 WP4018 HOMO SAPIENS	22	0.582488	2.04475	0	0.0320795
RESPONSE TO INTERLEUKIN-1 GOBP GO:0070555	31	0.52215	2.03932	0.00208768	0.0304712
RESPONSE TO TUMOR NECROSIS FACTOR GOBP GO:0034612	31	0.524539	2.03738	0	0.0284699
PYRIDINE NUCLEOTIDE BIOSYNTHETIC PROCESS GOBP GO:0019363	17	0.608555	2.03464	0.00211416	0.027167
PYRIDINE-CONTAINING COMPOUND BIOSYNTHETIC PROCESS GOBP GO:0072525	18	0.603839	2.02802	0.00431035	0.0271875
GLUTATHIONE METABOLIC PROCESS GOBP GO:0006749	15	0.653307	2.02345	0	0.0272774
ORGANOPHOSPHATE CATABOLIC PROCESS GOBP GO:0046434	31	0.515614	2.01247	0	0.0293127
NICOTINAMIDE NUCLEOTIDE BIOSYNTHETIC PROCESS GOBP GO:0019359	17	0.608555	2.007	0	0.029483
PROTEIN MODIFICATION BY SMALL PROTEIN REMOVAL GOBP GO:0070646	44	0.465809	2.00627	0.00207039	0.0279137
NUCLEOSIDE MONOPHOSPHATE BIOSYNTHETIC PROCESS GOBP GO:0009124	24	0.564847	2.00034	0	0.028501
C-TYPE LECTIN RECEPTORS (CLRS) REACTOME DATABASE ID RELEASE 71 5621481	31	0.513711	1.99966	0	0.0272711
MONOSACCHARIDE CATABOLIC PROCESS GOBP GO:0046365	22	0.561968	1.99556	0.00426439	0.0267784
CARBOHYDRATE BIOSYNTHETIC PROCESS GOBP GO:0016051	25	0.552721	1.99452	0	0.0257941
HALLMARK_DNA_REPAIR MSIGDB_C2 HALLMARK_DNA_REPAIR	24	0.561294	1.9938	0.00210526	0.0247276
RIBONUCLEOSIDE DIPHOSPHATE METABOLIC PROCESS GOBP GO:0009185	17	0.609405	1.99034	0	0.0245177
INTERLEUKIN-1 FAMILY SIGNALING REACTOME DATABASE ID RELEASE 71 446652	29	0.517929	1.99026	0	0.0236424
CELLULAR RESPONSE TO TUMOR NECROSIS FACTOR GOBP GO:0071356	30	0.512794	1.98907	0.00225225	0.0232357
CELLULAR RESPONSE TO INTERLEUKIN-1 GOBP GO:0071347	29	0.520935	1.98263	0	0.0242601
GLOBAL GENOME NUCLEOTIDE EXCISION REPAIR (GG-NER) REACTOME R-HSA-5696399.1	18	0.596995	1.97908	0	0.0246524
PROTEIN DEUBIQUITINATION GOBP GO:0016579	44	0.465809	1.97611	0.00397614	0.0245244
PYRIDINE-CONTAINING COMPOUND METABOLIC PROCESS GOBP GO:0072524	37	0.482313	1.9741	0	0.0244466
CELLULAR RESPONSE TO TOXIC SUBSTANCE GOBP GO:0097237	18	0.599283	1.97176	0.00207039	0.024201
NUCLEOTIDE METABOLISM REACTOME DATABASE ID RELEASE 71 15869	22	0.566252	1.97027	0	0.0238891
PYRUVATE BIOSYNTHETIC PROCESS GOBP GO:0042866	16	0.597436	1.9536	0.00196464	0.0277445
ADP METABOLIC PROCESS GOBP GO:0046031	16	0.597436	1.94933	0.00601202	0.0282667
NUCLEOSIDE DIPHOSPHATE METABOLIC PROCESS GOBP GO:0009132	22	0.553821	1.94828	0.00209205	0.027646
INTERLEUKIN-1 SIGNALING REACTOME R-HSA-9020702.1	28	0.507556	1.9448	0.00201613	0.0279352
UCH PROTEINASES REACTOME DATABASE ID RELEASE 71 5689603	29	0.504082	1.93795	0	0.0294694
RIBONUCLEOSIDE MONOPHOSPHATE BIOSYNTHETIC PROCESS GOBP GO:0009156	22	0.542703	1.93275	0.00612245	0.0304491
DNA METABOLIC PROCESS GOBP GO:0006259	52	0.429989	1.93234	0	0.029771
POSITIVE REGULATION OF I-KAPPAB KINASE/NF-KAPPAB SIGNALING GOBP GO:0043123	19	0.578169	1.93018	0	0.0295433
GLYCOLYSIS AND GLUCONEOGENESIS WIKIPATHWAYS_20191210 WP534 HOMO SAPIENS	23	0.539787	1.92882	0.00419287	0.0291384
PURINE NUCLEOSIDE DIPHOSPHATE METABOLIC PROCESS GOBP GO:0009135	16	0.597436	1.92829	0	0.0286938
PURINE RIBONUCLEOSIDE MONOPHOSPHATE BIOSYNTHETIC PROCESS GOBP GO:0009168	22	0.542703	1.92377	0.0020284	0.0293644
NICOTINAMIDE NUCLEOTIDE METABOLIC PROCESS GOBP GO:0046496	35	0.474472	1.92283	0	0.0288752
PURINE RIBONUCLEOSIDE DIPHOSPHATE METABOLIC PROCESS GOBP GO:0009179	16	0.597436	1.92253	0	0.0282621
CELLULAR RESPONSE TO DNA DAMAGE STIMULUS GOBP GO:0006974	53	0.432245	1.9192	0.00236967	0.0283292
HEXOSE CATABOLIC PROCESS GOBP GO:0019320	19	0.557724	1.91272	0.00208333	0.0295922
REGULATION OF BINDING GOBP GO:0051098	36	0.471897	1.90716	0	0.0309529
CARBOHYDRATE CATABOLIC PROCESS GOBP GO:0016052	31	0.480915	1.90214	0.00218818	0.0315687
NUCLEOTIDE PHOSPHORYLATION GOBP GO:0046939	20	0.54629	1.89407	0.00194553	0.0336706
PURINE NUCLEOSIDE MONOPHOSPHATE BIOSYNTHETIC PROCESS GOBP GO:0009127	22	0.542703	1.89276	0.00209205	0.0334967
NUCLEOSIDE DIPHOSPHATE PHOSPHORYLATION GOBP GO:0006165	20	0.54629	1.89206	0.0040404	0.0331009
NUCLEOBASE-CONTAINING SMALL MOLECULE BIOSYNTHETIC PROCESS GOBP GO:0034404	32	0.481142	1.8914	0	0.0326468
ATP GENERATION FROM ADP GOBP GO:0006757	16	0.597436	1.88813	0	0.0332645
CLEC7A (DECTIN-1) SIGNALING REACTOME R-HSA-5607764.1	29	0.496243	1.88667	0.0020202	0.0329871
PYRIDINE NUCLEOTIDE METABOLIC PROCESS GOBP GO:0019362	35	0.474472	1.88635	0.00212314	0.0324688
POSITIVE REGULATION OF MITOCHONDRION ORGANIZATION GOBP GO:0010822	22	0.522895	1.88132	0.00592885	0.0335831
NUCLEOBASE-CONTAINING COMPOUND BIOSYNTHETIC PROCESS GOBP GO:0034654	100	0.375715	1.87756	0	0.0343974
MONOSACCHARIDE BIOSYNTHETIC PROCESS GOBP GO:0046364	22	0.522931	1.87751	0.004158	0.0338144
CELLULAR CARBOHYDRATE METABOLIC PROCESS GOBP GO:0044262	17	0.569886	1.86891	0.0021322	0.0361838
REGULATION OF HEMOPOIESIS GOBP GO:1903706	43	0.447197	1.86772	0.00214592	0.0359966
GLYCOLYTIC PROCESS GOBP GO:0006096	16	0.597436	1.8664	0.00614754	0.0358562
BIOLOGICAL OXIDATIONS REACTOME DATABASE ID RELEASE 71 211859	28	0.491035	1.86632	0.00209644	0.0353275
INTERLEUKIN-1-MEDIATED SIGNALING PATHWAY GOBP GO:0070498	26	0.497838	1.86366	0.00665188	0.0352415
FC EPSILON RECEPTOR (FCERI) SIGNALING REACTOME DATABASE ID RELEASE 71 2454202	31	0.476654	1.84651	0	0.0402688
TUMOR NECROSIS FACTOR-MEDIATED SIGNALING PATHWAY GOBP GO:0033209	26	0.50888	1.84561	0.00196078	0.0398355
PROTEIN UBIQUITINATION REACTOME R-HSA-8852135.2	16	0.567566	1.84503	0.00209644	0.0393595
CYTOKINE-MEDIATED SIGNALING PATHWAY GOBP GO:0019221	71	0.390836	1.84301	0	0.0396442
ANTIGEN PROCESSING: UBIQUITINATION & PROTEASOME DEGRADATION REACTOME DATABASE ID RELEASE 71 983168	38	0.443048	1.84293	0.00443459	0.0390875
NUCLEOSIDE PHOSPHATE CATABOLIC PROCESS GOBP GO:1901292	27	0.49179	1.84189	0.00614754	0.0389534
TCR SIGNALING REACTOME R-HSA-202403.4	30	0.476448	1.82792	0	0.04372
METABOLISM OF POLYAMINES REACTOME R-HSA-351202.3	25	0.49541	1.82368	0.0021645	0.0448456
ANTIGEN RECEPTOR-MEDIATED SIGNALING PATHWAY GOBP GO:0050851	27	0.476982	1.81771	0.00205339	0.0465311
NEDDYLATION REACTOME DATABASE ID RELEASE 71 8951664	33	0.457681	1.81133	0.0021978	0.0487313
DOWNSTREAM TCR SIGNALING REACTOME R-HSA-202424.3	25	0.484129	1.80928	0.00417537	0.0490154
ATP BIOSYNTHETIC PROCESS GOBP GO:0006754	17	0.544858	1.80858	0.00612245	0.0486283
GLUCONEOGENESIS GOBP GO:0006094	18	0.538101	1.80489	0.00621118	0.0492287
FC-EPSILON RECEPTOR SIGNALING PATHWAY GOBP GO:0038095	29	0.468921	1.8039	0.00636943	0.0489669
HALLMARK_INTERFERON_GAMMA_RESPONSE MSIGDB_C2 HALLMARK_INTERFERON_GAMMA_RESPONSE	15	0.567296	1.8023	0.00195312	0.0488697
RESPONSE TO INORGANIC SUBSTANCE GOBP GO:0010035	43	0.426246	1.79267	0.00429185	0.0526184
NUCLEOTIDE CATABOLIC PROCESS GOBP GO:0009166	26	0.47977	1.79056	0.00627615	0.0530348
PID_MYC_ACTIV_PATHWAY MSIGDB_C2 PID_MYC_ACTIV_PATHWAY	26	0.47821	1.78911	0.00203666	0.0532303
REGULATION OF DNA REPAIR GOBP GO:0006282	15	0.554542	1.78662	0.00784314	0.053856
UBIQUITIN-DEPENDENT DEGRADATION OF CYCLIN D REACTOME DATABASE ID RELEASE 71 75815	24	0.487834	1.7834	0.00795229	0.0547991
RESPONSE TO METAL ION GOBP GO:0010038	30	0.460577	1.7785	0.00431035	0.056452
POSITIVE REGULATION OF BINDING GOBP GO:0051099	21	0.501157	1.77826	0.00613497	0.0559617
CHROMOSOME ORGANIZATION GOBP GO:0051276	65	0.375682	1.77762	0.00213675	0.0556754
NADH METABOLIC PROCESS GOBP GO:0006734	15	0.554482	1.77527	0.00660793	0.0561344
MITOTIC G1 PHASE AND G1 S TRANSITION REACTOME DATABASE ID RELEASE 71 453279	36	0.442834	1.77418	0.00227273	0.0559107
AROMATIC COMPOUND BIOSYNTHETIC PROCESS GOBP GO:0019438	108	0.347672	1.76751	0.00220751	0.0580903
INNATE IMMUNE RESPONSE-ACTIVATING SIGNAL TRANSDUCTION GOBP GO:0002758	34	0.438238	1.7653	0.0101833	0.0586827
GENE AND PROTEIN EXPRESSION BY JAK-STAT SIGNALING AFTER INTERLEUKIN-12 STIMULATION REACTOME R-HSA-8950505.3	21	0.507754	1.75781	0.0104167	0.0615992
HEXOSE BIOSYNTHETIC PROCESS GOBP GO:0019319	19	0.528571	1.75584	0.0218688	0.0619287
OXIDOREDUCTION COENZYME METABOLIC PROCESS GOBP GO:0006733	37	0.431504	1.75376	0.00431035	0.0622939
DEGRADATION OF GLI2 BY THE PROTEASOME REACTOME R-HSA-5610783.1	24	0.480783	1.75318	0.00635593	0.0619386
CELLULAR RESPONSE TO HYPOXIA REACTOME R-HSA-1234174.2	24	0.47661	1.75112	0.0125261	0.0623753
PROTEIN MODIFICATION BY SMALL PROTEIN CONJUGATION OR REMOVAL GOBP GO:0070647	92	0.350842	1.75004	0	0.0625374
REGULATION OF ORNITHINE DECARBOXYLASE (ODC) REACTOME R-HSA-350562.2	22	0.486349	1.74993	0.00845666	0.0619397
NEGATIVE REGULATION OF TRANSPORT GOBP GO:0051051	51	0.393684	1.747	0.00211416	0.0628011
RESPONSE TO BIOTIC STIMULUS GOBP GO:0009607	48	0.403939	1.74532	0.00206186	0.0631636
PROTEIN UBIQUITINATION GOBP GO:0016567	50	0.400181	1.74382	0.00422833	0.0631836
B CELL ACTIVATION REACTOME DATABASE ID RELEASE 71 983705	27	0.462439	1.74312	0.0126316	0.0628951
GLI3 IS PROCESSED TO GLI3R BY THE PROTEASOME REACTOME R-HSA-5610785.1	24	0.480783	1.74078	0.0123203	0.0636178
FCERI MEDIATED NF-KB ACTIVATION REACTOME R-HSA-2871837.2	25	0.484129	1.73873	0.00421941	0.063832
S PHASE REACTOME DATABASE ID RELEASE 71 69242	29	0.454806	1.73812	0.00793651	0.0635816
ORGANIC HYDROXY COMPOUND METABOLIC PROCESS GOBP GO:1901615	32	0.437752	1.73469	0.00653595	0.0646621
CELLULAR RESPONSE TO CYTOKINE STIMULUS GOBP GO:0071345	90	0.350684	1.73094	0	0.0661992
PURINE RIBONUCLEOSIDE TRIPHOSPHATE BIOSYNTHETIC PROCESS GOBP GO:0009206	18	0.518212	1.72825	0.0200401	0.0670071
REGULATION OF TRANSCRIPTION FROM RNA POLYMERASE II PROMOTER IN RESPONSE TO STRESS GOBP GO:0043618	25	0.480286	1.72819	0.010142	0.066427
GLUCONEOGENESIS REACTOME R-HSA-70263.2	17	0.523517	1.7274	0.0105932	0.0662948
REGULATION OF DNA-TEMPLATED TRANSCRIPTION IN RESPONSE TO STRESS GOBP GO:0043620	25	0.480286	1.72522	0.00869565	0.0668841
NIK-->NONCANONICAL NF-KB SIGNALING REACTOME DATABASE ID RELEASE 71 5676590	24	0.474614	1.72516	0.00886918	0.0662985
NUCLEOSIDE TRIPHOSPHATE BIOSYNTHETIC PROCESS GOBP GO:0009142	24	0.477191	1.72473	0.00638298	0.0659195
OXYGEN-DEPENDENT PROLINE HYDROXYLATION OF HYPOXIA-INDUCIBLE FACTOR ALPHA REACTOME DATABASE ID RELEASE 71 1234176	24	0.47661	1.72418	0.00440529	0.065709
CARBOHYDRATE METABOLIC PROCESS GOBP GO:0005975	58	0.376814	1.72156	0.00449438	0.0664676
UBIQUITIN-DEPENDENT PROTEIN CATABOLIC PROCESS GOBP GO:0006511	58	0.380942	1.72068	0.00210526	0.0662874
TNFR2 NON-CANONICAL NF-KB PATHWAY REACTOME R-HSA-5668541.2	24	0.474614	1.71936	0.00998004	0.0663469
DOWNSTREAM SIGNALING EVENTS OF B CELL RECEPTOR (BCR) REACTOME DATABASE ID RELEASE 71 1168372	27	0.462439	1.71895	0.00614754	0.065972
ORGANIC CYCLIC COMPOUND BIOSYNTHETIC PROCESS GOBP GO:1901362	122	0.323786	1.7189	0.00205761	0.0654395
DECTIN-1 MEDIATED NONCANONICAL NF-KB SIGNALING REACTOME DATABASE ID RELEASE 71 5607761	24	0.474614	1.71775	0.0149254	0.065479
MONOSACCHARIDE METABOLIC PROCESS GOBP GO:0005996	40	0.428933	1.71731	0.00630252	0.0652609
VALIDATED TARGETS OF C-MYC TRANSCRIPTIONAL ACTIVATION PATHWAY INTERACTION DATABASE NCI-NATURE CURATED DATA VALIDATED TARGETS OF C-MYC TRANSCRIPTIONAL ACTIVATION	27	0.464121	1.71638	0	0.0651432
G1 S TRANSITION REACTOME DATABASE ID RELEASE 71 69206	34	0.42691	1.70893	0.0127389	0.0683451
SELENIUM MICRONUTRIENT NETWORK WIKIPATHWAYS_20191210 WP15 HOMO SAPIENS	15	0.546496	1.70589	0.0107527	0.0692718
T CELL RECEPTOR SIGNALING PATHWAY GOBP GO:0050852	26	0.461202	1.70159	0.012685	0.0709732
NUCLEOTIDE BIOSYNTHETIC PROCESS GOBP GO:0009165	42	0.399361	1.69775	0.002079	0.0726274
RIBONUCLEOSIDE TRIPHOSPHATE BIOSYNTHETIC PROCESS GOBP GO:0009201	18	0.518212	1.69548	0.0165631	0.0735375
ORGANOPHOSPHATE BIOSYNTHETIC PROCESS GOBP GO:0090407	61	0.365237	1.69261	0.00412371	0.0743859
HEDGEHOG 'OFF' STATE REACTOME DATABASE ID RELEASE 71 5610787	26	0.460084	1.69052	0.0200401	0.0750421
COVALENT CHROMATIN MODIFICATION GOBP GO:0016569	22	0.475347	1.68929	0.0136719	0.0751558
CELLULAR RESPONSE TO INTERLEUKIN-12 GOBP GO:0071349	22	0.467265	1.68872	0.0133038	0.0748419
NEGATIVE REGULATION OF HYDROLASE ACTIVITY GOBP GO:0051346	35	0.422822	1.68617	0.0140281	0.0757278
CHROMATIN ORGANIZATION GOBP GO:0006325	36	0.415092	1.68303	0	0.0769105
REGULATION OF CYTOKINE SECRETION GOBP GO:0050707	16	0.521175	1.68215	0.00828157	0.0768828
HETEROCYCLE BIOSYNTHETIC PROCESS GOBP GO:0018130	112	0.327712	1.68203	0	0.0763513
ASSEMBLY OF THE PRE-REPLICATIVE COMPLEX REACTOME R-HSA-68867.4	22	0.461521	1.68157	0.0136719	0.0760385
RESPONSE TO OTHER ORGANISM GOBP GO:0051707	45	0.395526	1.67761	0.0105485	0.0777679
STIMULATORY C-TYPE LECTIN RECEPTOR SIGNALING PATHWAY GOBP GO:0002223	24	0.465256	1.6772	0.0140562	0.0774123
REGULATION OF MOLECULAR FUNCTION GOBP GO:0065009	218	0.290446	1.67626	0	0.0774288
RESPONSE TO CYTOKINE GOBP GO:0034097	92	0.333584	1.67239	0.0021692	0.079382
RESPONSE TO EXTERNAL BIOTIC STIMULUS GOBP GO:0043207	45	0.395526	1.67213	0.00205339	0.0789487
PROTEASOME DEGRADATION WIKIPATHWAYS_20191210 WP183 HOMO SAPIENS	24	0.47108	1.66958	0.0137525	0.0801161
NAD METABOLIC PROCESS GOBP GO:0019674	17	0.511849	1.66752	0.0167715	0.080939
PURINE NUCLEOSIDE TRIPHOSPHATE BIOSYNTHETIC PROCESS GOBP GO:0009145	18	0.518212	1.66446	0.0219561	0.0822486
CDC20:PHOSPHO-APC C MEDIATED DEGRADATION OF CYCLIN A REACTOME R-HSA-174184.2	22	0.461521	1.66281	0.028866	0.082586
REGULATION OF RUNX3 EXPRESSION AND ACTIVITY REACTOME DATABASE ID RELEASE 71 8941858	23	0.459675	1.66108	0.0148936	0.0828669
INTERLEUKIN-12 FAMILY SIGNALING REACTOME R-HSA-447115.5	22	0.467265	1.66042	0.0150215	0.0827782
POSITIVE REGULATION OF TRANSFERASE ACTIVITY GOBP GO:0051347	45	0.381362	1.65825	0.00659341	0.0836474
G2 M CHECKPOINTS REACTOME R-HSA-69481.3	32	0.43294	1.65576	0.0137525	0.0846173
ACTIVATION OF APC C AND APC C:CDC20 MEDIATED DEGRADATION OF MITOTIC PROTEINS REACTOME R-HSA-176814.2	22	0.461521	1.65342	0.0126316	0.0854199
G1 S DNA DAMAGE CHECKPOINTS REACTOME R-HSA-69615.2	23	0.459675	1.65175	0.0211864	0.085939
STABILIZATION OF P53 REACTOME R-HSA-69541.5	23	0.459675	1.65053	0.0149573	0.0861472
APC C-MEDIATED DEGRADATION OF CELL CYCLE PROTEINS REACTOME R-HSA-174143.1	23	0.450309	1.65029	0.0238095	0.085781
INNATE IMMUNE RESPONSE ACTIVATING CELL SURFACE RECEPTOR SIGNALING PATHWAY GOBP GO:0002220	24	0.465256	1.65014	0.0163599	0.0853258
P53-INDEPENDENT G1 S DNA DAMAGE CHECKPOINT REACTOME R-HSA-69613.2	22	0.461521	1.64989	0.018	0.0849002
P53-INDEPENDENT DNA DAMAGE RESPONSE REACTOME DATABASE ID RELEASE 71 69610	22	0.461521	1.64963	0.0232558	0.0844807
FBXL7 DOWN-REGULATES AURKA DURING MITOTIC ENTRY AND IN EARLY MITOSIS REACTOME DATABASE ID RELEASE 71 8854050	23	0.450309	1.64905	0.0273684	0.0843914
SYNTHESIS OF DNA REACTOME DATABASE ID RELEASE 71 69239	27	0.441795	1.64744	0.0203252	0.0848737
REGULATION OF MITOCHONDRION ORGANIZATION GOBP GO:0010821	29	0.432019	1.64538	0.00210084	0.0857157
SIGNALING BY INTERLEUKINS REACTOME R-HSA-449147.11	71	0.34434	1.64518	0.00692841	0.0853105
DNA REPLICATION REACTOME R-HSA-69306.4	27	0.441795	1.64513	0.0185185	0.0848051
APC:CDC20 MEDIATED DEGRADATION OF CELL CYCLE PROTEINS PRIOR TO SATISFATION OF THE CELL CYCLE CHECKPOINT REACTOME R-HSA-179419.1	22	0.461521	1.64299	0.0208333	0.085652
ACTIVATION OF NF-KAPPAB IN B CELLS REACTOME DATABASE ID RELEASE 71 1169091	23	0.450309	1.64119	0.0197368	0.0860477
ABC-FAMILY PROTEINS MEDIATED TRANSPORT REACTOME R-HSA-382556.4	25	0.436093	1.64019	0.0182927	0.0860161
INTERLEUKIN-12 SIGNALING REACTOME R-HSA-9020591.1	22	0.467265	1.63868	0.0143737	0.0863211
P53-DEPENDENT G1 S DNA DAMAGE CHECKPOINT REACTOME DATABASE ID RELEASE 71 69580	23	0.459675	1.63806	0.0227273	0.0861625
APC C:CDC20 MEDIATED DEGRADATION OF MITOTIC PROTEINS REACTOME DATABASE ID RELEASE 71 176409	22	0.461521	1.63792	0.029148	0.0857941
HISTONE MODIFICATION GOBP GO:0016570	22	0.475347	1.63784	0.010352	0.08533
INTERLEUKIN-12-MEDIATED SIGNALING PATHWAY GOBP GO:0035722	22	0.467265	1.63286	0.0280172	0.087701
UBIQUITIN MEDIATED DEGRADATION OF PHOSPHORYLATED CDC25A REACTOME DATABASE ID RELEASE 71 69601	22	0.461521	1.63206	0.00821355	0.0876907
HEXOSE METABOLIC PROCESS GOBP GO:0019318	31	0.417723	1.63131	0.0126582	0.0876111
CELL CYCLE PHASE TRANSITION GOBP GO:0044770	34	0.408631	1.63084	0.0102459	0.0873748
RESPONSE TO INTERLEUKIN-12 GOBP GO:0070671	22	0.467265	1.62873	0.0209644	0.0882899
NEGATIVE REGULATION OF NOTCH4 SIGNALING REACTOME DATABASE ID RELEASE 71 9604323	24	0.447429	1.62857	0.0229167	0.0879265
REGULATION OF CELLULAR AMINO ACID METABOLIC PROCESS GOBP GO:0006521	24	0.448898	1.62744	0.0245902	0.0880722
REGULATION OF APOPTOSIS REACTOME R-HSA-169911.2	23	0.449773	1.62692	0.026694	0.0879139
REGULATION OF MITOTIC CELL CYCLE REACTOME R-HSA-453276.2	23	0.450309	1.62676	0.0255906	0.0875347
TRANSCRIPTION BY RNA POLYMERASE II GOBP GO:0006366	21	0.462564	1.62606	0.00838574	0.0875614
SCF(SKP2)-MEDIATED DEGRADATION OF P27 P21 REACTOME R-HSA-187577.3	24	0.445987	1.62558	0.0175824	0.0874024
DNA CONFORMATION CHANGE GOBP GO:0071103	22	0.467577	1.62329	0.0229645	0.0883839
NUCLEOSIDE PHOSPHATE BIOSYNTHETIC PROCESS GOBP GO:1901293	46	0.376083	1.62258	0.012931	0.0883073
P53-DEPENDENT G1 DNA DAMAGE RESPONSE REACTOME DATABASE ID RELEASE 71 69563	23	0.459675	1.62223	0.0169851	0.0880008
VIF-MEDIATED DEGRADATION OF APOBEC3G REACTOME DATABASE ID RELEASE 71 180585	22	0.461521	1.62203	0.0167364	0.0876554
APC C:CDC20 MEDIATED DEGRADATION OF SECURIN REACTOME R-HSA-174154.2	22	0.461521	1.62121	0.0149254	0.0876459
CYCLIN A:CDK2-ASSOCIATED EVENTS AT S PHASE ENTRY REACTOME R-HSA-69656.3	24	0.445987	1.62103	0.0204918	0.087271
REGULATION OF ACTIVATED PAK-2P34 BY PROTEASOME MEDIATED DEGRADATION REACTOME DATABASE ID RELEASE 71 211733	23	0.449773	1.62057	0.0225873	0.0870885
APC C:CDH1 MEDIATED DEGRADATION OF CDC20 AND OTHER APC C:CDH1 TARGETED PROTEINS IN LATE MITOSIS EARLY G1 REACTOME R-HSA-174178.2	22	0.461521	1.61958	0.0123967	0.0872509
CDT1 ASSOCIATION WITH THE CDC6:ORC:ORIGIN COMPLEX REACTOME DATABASE ID RELEASE 71 68827	22	0.461521	1.6192	0.024952	0.087056
CDK-MEDIATED PHOSPHORYLATION AND REMOVAL OF CDC6 REACTOME DATABASE ID RELEASE 71 69017	22	0.461521	1.61812	0.0192719	0.08727
DEGRADATION OF AXIN REACTOME R-HSA-4641257.2	22	0.461521	1.61772	0.039916	0.0870575
POSITIVE REGULATION OF NUCLEOBASE-CONTAINING COMPOUND METABOLIC PROCESS GOBP GO:0045935	111	0.309634	1.61435	0.00217391	0.0885752
POSITIVE REGULATION OF DEFENSE RESPONSE GOBP GO:0031349	52	0.366863	1.61301	0.00662252	0.0890398
ACTIVATION OF INNATE IMMUNE RESPONSE GOBP GO:0002218	40	0.387655	1.61171	0.0193966	0.0893824
GLUCOSE METABOLIC PROCESS GOBP GO:0006006	25	0.447739	1.61081	0.0230608	0.0894271
REGULATION OF PROTEIN TRANSPORT GOBP GO:0051223	59	0.35195	1.61016	0.0131868	0.0894109
AUTODEGRADATION OF THE E3 UBIQUITIN LIGASE COP1 REACTOME R-HSA-349425.2	22	0.461521	1.60756	0.0261438	0.0905674
ANAPHASE-PROMOTING COMPLEX-DEPENDENT CATABOLIC PROCESS GOBP GO:0031145	22	0.461521	1.60524	0.0214133	0.0915889
NEGATIVE REGULATION OF BINDING GOBP GO:0051100	17	0.491771	1.60516	0.0212766	0.0911933
AUTODEGRADATION OF CDH1 BY CDH1:APC C REACTOME DATABASE ID RELEASE 71 174084	22	0.461521	1.6044	0.0527426	0.0912465
ORC1 REMOVAL FROM CHROMATIN REACTOME R-HSA-68949.3	23	0.450309	1.60366	0.0229645	0.091156
DEUBIQUITINATION REACTOME R-HSA-5688426.3	47	0.371349	1.60147	0.00860215	0.0920228
DEGRADATION OF DVL REACTOME R-HSA-4641258.2	22	0.461521	1.60116	0.021645	0.0917476
REGULATION OF APC C ACTIVATORS BETWEEN G1 S AND EARLY ANAPHASE REACTOME DATABASE ID RELEASE 71 176408	23	0.450309	1.59948	0.0258065	0.0923861
HH MUTANTS ABROGATE LIGAND SECRETION REACTOME R-HSA-5387390.3	23	0.442296	1.59858	0.0286299	0.0924694
CYCLIN E ASSOCIATED EVENTS DURING G1 S TRANSITION REACTOME R-HSA-69202.3	24	0.445987	1.59827	0.0239521	0.0921898
ABC TRANSPORTER DISORDERS REACTOME DATABASE ID RELEASE 71 5619084	23	0.442296	1.59768	0.0200893	0.092148
REGULATION OF PEPTIDE TRANSPORT GOBP GO:0090087	59	0.35195	1.59758	0.012605	0.0917589
REGULATION OF TRANSCRIPTION FROM RNA POLYMERASE II PROMOTER IN RESPONSE TO HYPOXIA GOBP GO:0061418	23	0.448472	1.59741	0.0295359	0.0914674
REGULATION OF CELLULAR AMINE METABOLIC PROCESS GOBP GO:0033238	25	0.444336	1.59595	0.0298805	0.0920158
REGULATION OF G2/M TRANSITION OF MITOTIC CELL CYCLE GOBP GO:0010389	40	0.380484	1.59537	0.00886918	0.0919862
DEFECTIVE CFTR CAUSES CYSTIC FIBROSIS REACTOME R-HSA-5678895.2	23	0.442296	1.59465	0.0200401	0.0919705
SWITCHING OF ORIGINS TO A POST-REPLICATIVE STATE REACTOME DATABASE ID RELEASE 71 69052	23	0.450309	1.59455	0.0195652	0.0916102
SCF-BETA-TRCP MEDIATED DEGRADATION OF EMI1 REACTOME DATABASE ID RELEASE 71 174113	23	0.450309	1.59325	0.0350515	0.091963
POSITIVE REGULATION OF INTRACELLULAR SIGNAL TRANSDUCTION GOBP GO:1902533	70	0.338987	1.59021	0.00817996	0.0934864
REGULATION OF RAS BY GAPS REACTOME R-HSA-5658442.1	23	0.43813	1.58531	0.0230608	0.0963588
REGULATION OF RUNX2 EXPRESSION AND ACTIVITY REACTOME DATABASE ID RELEASE 71 8939902	25	0.431411	1.58502	0.0275049	0.0960946
HEDGEHOG 'ON' STATE REACTOME R-HSA-5632684.1	24	0.437951	1.58257	0.0164609	0.0973127
HH MUTANTS THAT DON'T UNDERGO AUTOCATALYTIC PROCESSING ARE DEGRADED BY ERAD REACTOME R-HSA-5362768.1	23	0.442296	1.57641	0.029661	0.101056
DEGRADATION OF GLI1 BY THE PROTEASOME REACTOME R-HSA-5610780.1	24	0.442439	1.57547	0.0384615	0.10124
REGULATION OF AUTOPHAGY GOBP GO:0010506	33	0.397502	1.57525	0.029148	0.100904
REGULATION OF CATALYTIC ACTIVITY GOBP GO:0050790	175	0.283283	1.57462	0.0021978	0.100877
ACTIVATION OF PROTEIN KINASE ACTIVITY GOBP GO:0032147	20	0.459958	1.57347	0.0241228	0.101048
CELLULAR RESPONSE TO CHEMICAL STIMULUS GOBP GO:0070887	240	0.270401	1.57151	0	0.102041
MITOTIC CELL CYCLE PHASE TRANSITION GOBP GO:0044772	33	0.397298	1.5715	0.0228833	0.101586
VPU MEDIATED DEGRADATION OF CD4 REACTOME R-HSA-180534.1	23	0.450309	1.56916	0.0319149	0.102625
POSITIVE REGULATION OF KINASE ACTIVITY GOBP GO:0033674	32	0.398411	1.56299	0.0257511	0.106232
SIGNALING BY HEDGEHOG REACTOME DATABASE ID RELEASE 71 5358351	30	0.404958	1.56219	0.018	0.106372
NEGATIVE REGULATION OF MOLECULAR FUNCTION GOBP GO:0044092	92	0.311375	1.56092	0.00892857	0.106885
MONOCARBOXYLIC ACID BIOSYNTHETIC PROCESS GOBP GO:0072330	30	0.408892	1.5591	0.0229167	0.10752
POSITIVE REGULATION OF CELLULAR METABOLIC PROCESS GOBP GO:0031325	234	0.270917	1.5564	0.00218818	0.109052
RUNX1 REGULATES TRANSCRIPTION OF GENES INVOLVED IN DIFFERENTIATION OF HSCS REACTOME R-HSA-8939236.1	23	0.440678	1.55556	0.0341365	0.109144
DNA REPLICATION PRE-INITIATION REACTOME R-HSA-69002.2	25	0.425428	1.55447	0.0271845	0.109464
POSITIVE REGULATION OF NITROGEN COMPOUND METABOLIC PROCESS GOBP GO:0051173	226	0.266516	1.5527	0.002331	0.110361
BIOCARTA_PROTEASOME_PATHWAY MSIGDB_C2 BIOCARTA_PROTEASOME_PATHWAY	17	0.470419	1.5523	0.0506329	0.110306
SIGNAL TRANSDUCTION BY PROTEIN PHOSPHORYLATION GOBP GO:0023014	47	0.355127	1.55144	0.0273109	0.11043
HEDGEHOG LIGAND BIOGENESIS REACTOME R-HSA-5358346.1	25	0.421029	1.54825	0.0265306	0.112237
MAPK6 MAPK4 SIGNALING REACTOME DATABASE ID RELEASE 71 5687128	27	0.414196	1.54743	0.0338983	0.112345
REGULATION OF RESPONSE TO DNA DAMAGE STIMULUS GOBP GO:2001020	20	0.445702	1.54612	0.0322581	0.112866
SCF-DEPENDENT PROTEASOMAL UBIQUITIN-DEPENDENT PROTEIN CATABOLIC PROCESS GOBP GO:0031146	22	0.43336	1.54207	0.0282828	0.115371
PROTEIN MODIFICATION BY SMALL PROTEIN CONJUGATION GOBP GO:0032446	73	0.32324	1.53574	0.0109409	0.119989
POSITIVE REGULATION OF PROTEIN LOCALIZATION TO NUCLEUS GOBP GO:1900182	15	0.488773	1.53573	0.0584551	0.119497
MAPK CASCADE GOBP GO:0000165	44	0.364926	1.53396	0.0287474	0.120393
NIK/NF-KAPPAB SIGNALING GOBP GO:0038061	22	0.43336	1.53317	0.0410959	0.120449
RESPONSE TO CHEMICAL GOBP GO:0042221	295	0.255456	1.53283	0.00461894	0.120276
NEGATIVE REGULATION OF PEPTIDASE ACTIVITY GOBP GO:0010466	22	0.433522	1.53157	0.0342052	0.120866
DEFENSE RESPONSE GOBP GO:0006952	41	0.364565	1.53139	0.0292887	0.120543
REGULATION OF HEMATOPOIETIC STEM CELL DIFFERENTIATION GOBP GO:1902036	22	0.43073	1.52993	0.0409357	0.121242
REGULATION OF CELL CYCLE G2/M PHASE TRANSITION GOBP GO:1902749	42	0.363873	1.52736	0.0289256	0.122772
REGULATION OF HYDROLASE ACTIVITY GOBP GO:0051336	95	0.305046	1.52609	0.00869565	0.123411
PHOSPHORUS METABOLIC PROCESS GOBP GO:0006793	223	0.264708	1.52594	0.00222222	0.12305
NEGATIVE REGULATION OF PROTEIN TRANSPORT GOBP GO:0051224	19	0.458751	1.52509	0.0469388	0.123303
REGULATION OF PROTEOLYSIS GOBP GO:0030162	80	0.316121	1.52169	0.0133333	0.125528
REGULATION OF INTRACELLULAR PROTEIN TRANSPORT GOBP GO:0033157	27	0.410376	1.52167	0.0368764	0.125053
POSITIVE REGULATION OF MOLECULAR FUNCTION GOBP GO:0044093	131	0.291254	1.52137	0.00643777	0.124781
REGULATION OF CYTOKINE PRODUCTION GOBP GO:0001817	41	0.35826	1.52045	0.0254237	0.124963
CELLULAR BIOSYNTHETIC PROCESS GOBP GO:0044249	264	0.258707	1.51843	0.00229358	0.126223
REGULATION OF MACROAUTOPHAGY GOBP GO:0016241	21	0.433221	1.51739	0.0267857	0.126545
NABA_MATRISOME_ASSOCIATED MSIGDB_C2 NABA_MATRISOME_ASSOCIATED	50	0.345898	1.51445	0.0359551	0.12852
POSITIVE REGULATION OF DNA METABOLIC PROCESS GOBP GO:0051054	22	0.427056	1.5136	0.0334728	0.128716
THE ROLE OF GTSE1 IN G2 M PROGRESSION AFTER G2 CHECKPOINT REACTOME DATABASE ID RELEASE 71 8852276	25	0.41591	1.51185	0.0540541	0.129629
CROSS-PRESENTATION OF SOLUBLE EXOGENOUS ANTIGENS (ENDOSOMES) REACTOME R-HSA-1236978.1	21	0.435689	1.51156	0.0515464	0.129427
POSITIVE REGULATION OF BIOSYNTHETIC PROCESS GOBP GO:0009891	123	0.285206	1.50567	0.013986	0.133918
REGULATION OF HEMATOPOIETIC PROGENITOR CELL DIFFERENTIATION GOBP GO:1901532	22	0.43073	1.50499	0.043299	0.133915
MODIFICATION-DEPENDENT PROTEIN CATABOLIC PROCESS GOBP GO:0019941	59	0.334287	1.50377	0.0262582	0.134489
POSITIVE REGULATION OF EPITHELIAL CELL MIGRATION GOBP GO:0010634	16	0.465062	1.50288	0.07431	0.134639
ALCOHOL METABOLIC PROCESS GOBP GO:0006066	27	0.404292	1.5013	0.0431035	0.13535
AUF1 (HNRNP D0) BINDS AND DESTABILIZES MRNA REACTOME DATABASE ID RELEASE 71 450408	26	0.407168	1.50123	0.0352697	0.134916
HALLMARK_P53_PATHWAY MSIGDB_C2 HALLMARK_P53_PATHWAY	20	0.440956	1.4983	0.0359408	0.136951
IMMUNE RESPONSE GOBP GO:0006955	146	0.278415	1.49593	0.0154525	0.138388
AROMATIC COMPOUND CATABOLIC PROCESS GOBP GO:0019439	94	0.301068	1.49114	0.00455581	0.142106
REGULATION OF DEPHOSPHORYLATION GOBP GO:0035303	17	0.45233	1.49058	0.0627706	0.142043
LEUKOCYTE ACTIVATION GOBP GO:0045321	131	0.281177	1.48951	0.0123967	0.142465
CELLULAR NITROGEN COMPOUND BIOSYNTHETIC PROCESS GOBP GO:0044271	187	0.261843	1.48479	0.0107066	0.146148
REGULATION OF ENDOPEPTIDASE ACTIVITY GOBP GO:0052548	39	0.358088	1.48312	0.0478261	0.147142
PHOSPHATE-CONTAINING COMPOUND METABOLIC PROCESS GOBP GO:0006796	217	0.256073	1.48107	0	0.148329
NEGATIVE REGULATION OF G2/M TRANSITION OF MITOTIC CELL CYCLE GOBP GO:0010972	24	0.407124	1.47936	0.054	0.149347
RESPONSE TO CALCIUM ION GOBP GO:0051592	17	0.439584	1.47713	0.0655391	0.150993
NEGATIVE REGULATION OF CELL CYCLE G2/M PHASE TRANSITION GOBP GO:1902750	25	0.402855	1.47535	0.0594059	0.152008
MODIFICATION-DEPENDENT MACROMOLECULE CATABOLIC PROCESS GOBP GO:0043632	60	0.319423	1.47435	0.0218818	0.152508
MYELOID LEUKOCYTE MEDIATED IMMUNITY GOBP GO:0002444	121	0.280115	1.47129	0.0173913	0.15455
CELLULAR ALDEHYDE METABOLIC PROCESS GOBP GO:0006081	17	0.460582	1.4708	0.0496032	0.154437
POSITIVE REGULATION OF SIGNAL TRANSDUCTION GOBP GO:0009967	123	0.279909	1.47065	0.00631579	0.154004
PROTEIN POLYUBIQUITINATION GOBP GO:0000209	37	0.366086	1.47023	0.0333333	0.153873
POSITIVE REGULATION OF PHOSPHORUS METABOLIC PROCESS GOBP GO:0010562	66	0.313314	1.46765	0.0151188	0.155713
REGULATION OF CELLULAR PROTEIN METABOLIC PROCESS GOBP GO:0032268	220	0.252872	1.4666	0.00873363	0.156062
NUCLEIC ACID-TEMPLATED TRANSCRIPTION GOBP GO:0097659	30	0.379689	1.46529	0.0504854	0.156784
POSITIVE REGULATION OF CELLULAR BIOSYNTHETIC PROCESS GOBP GO:0031328	120	0.275152	1.46431	0.0136986	0.157112
PROTEOLYSIS GOBP GO:0006508	112	0.284244	1.46374	0.0138568	0.157145
REGULATION OF MITOTIC CELL CYCLE PHASE TRANSITION GOBP GO:1901990	57	0.329428	1.4636	0.02537	0.15676
RNA BIOSYNTHETIC PROCESS GOBP GO:0032774	30	0.379689	1.46252	0.04158	0.157205
RIBONUCLEOTIDE BIOSYNTHETIC PROCESS GOBP GO:0009260	31	0.378844	1.46176	0.0531915	0.157328
POSITIVE REGULATION OF PHOSPHATE METABOLIC PROCESS GOBP GO:0045937	66	0.313314	1.45961	0.0280172	0.158927
POSITIVE REGULATION OF ION TRANSPORT GOBP GO:0043270	17	0.442927	1.45681	0.0821643	0.161185
POSITIVE REGULATION OF PROTEIN KINASE ACTIVITY GOBP GO:0045860	30	0.374413	1.45495	0.0515695	0.16251
ASSOCIATION BETWEEN PHYSICO-CHEMICAL FEATURES AND TOXICITY ASSOCIATED PATHWAYS WIKIPATHWAYS_20191210 WP3680 HOMO SAPIENS	17	0.440074	1.45395	0.0698603	0.163018
RIBOSE PHOSPHATE BIOSYNTHETIC PROCESS GOBP GO:0046390	33	0.365497	1.44886	0.0648536	0.167497
POSITIVE REGULATION OF SIGNALING GOBP GO:0023056	126	0.27402	1.4486	0.0108225	0.167161
REGULATION OF ION TRANSMEMBRANE TRANSPORTER ACTIVITY GOBP GO:0032412	18	0.433049	1.44753	0.0542798	0.167722
TRANSCRIPTION, DNA-TEMPLATED GOBP GO:0006351	30	0.379689	1.4469	0.0486815	0.167845
MYELOID LEUKOCYTE ACTIVATION GOBP GO:0002274	120	0.273277	1.44676	0.0191847	0.167484
LEUKOCYTE MEDIATED IMMUNITY GOBP GO:0002443	122	0.274934	1.44616	0.0242291	0.167537
REGULATION OF PTEN STABILITY AND ACTIVITY REACTOME R-HSA-8948751.1	23	0.409729	1.44587	0.0631808	0.16728
NUCLEOBASE-CONTAINING COMPOUND METABOLIC PROCESS GOBP GO:0006139	324	0.239356	1.44524	0.00232019	0.167377
NEGATIVE REGULATION OF CELLULAR PROTEIN METABOLIC PROCESS GOBP GO:0032269	92	0.286713	1.44514	0.0281996	0.166964
CELLULAR AROMATIC COMPOUND METABOLIC PROCESS GOBP GO:0006725	344	0.237858	1.4439	0.00235294	0.16765
POSITIVE REGULATION OF ESTABLISHMENT OF PROTEIN LOCALIZATION TO MITOCHONDRION GOBP GO:1903749	15	0.460251	1.44352	0.0598802	0.167476
ASYMMETRIC LOCALIZATION OF PCP PROTEINS REACTOME R-HSA-4608870.1	23	0.397975	1.4423	0.0767635	0.168132
ORGANIC CYCLIC COMPOUND CATABOLIC PROCESS GOBP GO:1901361	100	0.28832	1.44125	0.0294118	0.168695
BCR NETPATH BCR	16	0.452267	1.44111	0.0588235	0.168275
NEUTROPHIL MEDIATED IMMUNITY GOBP GO:0002446	120	0.273519	1.43904	0.0157303	0.169813
BIOSYNTHETIC PROCESS GOBP GO:0009058	278	0.246536	1.43822	0.00671141	0.170124
NEGATIVE REGULATION OF PROTEOLYSIS GOBP GO:0045861	32	0.370682	1.43806	0.0663984	0.169768
POSITIVE REGULATION OF MAP KINASE ACTIVITY GOBP GO:0043406	15	0.458439	1.43666	0.0704225	0.17084
POSITIVE REGULATION OF CELL COMMUNICATION GOBP GO:0010647	124	0.271716	1.43468	0.0175439	0.172364
REGULATION OF RESPONSE TO EXTERNAL STIMULUS GOBP GO:0032101	41	0.342427	1.4339	0.0565217	0.172605
POSITIVE REGULATION OF CYTOKINE PRODUCTION GOBP GO:0001819	25	0.390476	1.43236	0.0688172	0.173836
REGULATION OF INTRACELLULAR SIGNAL TRANSDUCTION GOBP GO:1902531	128	0.27006	1.43217	0.0152174	0.17346
DEGRADATION OF BETA-CATENIN BY THE DESTRUCTION COMPLEX REACTOME R-HSA-195253.2	28	0.37593	1.43144	0.0633947	0.173728
CARBOHYDRATE DERIVATIVE BIOSYNTHETIC PROCESS GOBP GO:1901137	64	0.307922	1.42762	0.0328228	0.177252
POSITIVE REGULATION OF PROTEIN MODIFICATION PROCESS GOBP GO:0031401	75	0.298456	1.42735	0.0251716	0.176988
REGULATION OF MRNA STABILITY BY PROTEINS THAT BIND AU-RICH ELEMENTS REACTOME R-HSA-450531.4	32	0.362277	1.42586	0.0613497	0.178091
ORGANIC SUBSTANCE BIOSYNTHETIC PROCESS GOBP GO:1901576	271	0.241424	1.42541	0.00941176	0.178065
LEUKOCYTE DEGRANULATION GOBP GO:0043299	120	0.273277	1.42461	0.0141176	0.178362
REGULATION OF PEPTIDASE ACTIVITY GOBP GO:0052547	46	0.328948	1.42346	0.0516129	0.178857
MYELOID CELL ACTIVATION INVOLVED IN IMMUNE RESPONSE GOBP GO:0002275	120	0.273277	1.42257	0.0183066	0.179299
POSITIVE REGULATION OF PROTEIN SERINE/THREONINE KINASE ACTIVITY GOBP GO:0071902	21	0.411435	1.42234	0.0811966	0.179
POSITIVE REGULATION OF INTRACELLULAR TRANSPORT GOBP GO:0032388	26	0.391198	1.42197	0.0686869	0.178918
NEGATIVE REGULATION OF ESTABLISHMENT OF PROTEIN LOCALIZATION GOBP GO:1904950	20	0.415942	1.42068	0.0727273	0.179877
NEGATIVE REGULATION OF SECRETION BY CELL GOBP GO:1903531	16	0.436368	1.41969	0.0663717	0.180419
REGULATION OF DEFENSE RESPONSE GOBP GO:0031347	69	0.305318	1.41856	0.0427928	0.181014
PROTEASOME-MEDIATED UBIQUITIN-DEPENDENT PROTEIN CATABOLIC PROCESS GOBP GO:0043161	49	0.32357	1.41707	0.0485232	0.182141
CELLULAR RESPONSE TO STRESS GOBP GO:0033554	176	0.255646	1.41516	0.0120192	0.183672
NEUTROPHIL ACTIVATION INVOLVED IN IMMUNE RESPONSE GOBP GO:0002283	119	0.266533	1.41052	0.0223714	0.188183
NEGATIVE REGULATION OF CELLULAR PROCESS GOBP GO:0048523	366	0.231404	1.41006	0.00241546	0.188158
SMALL MOLECULE CATABOLIC PROCESS GOBP GO:0044282	91	0.287323	1.40982	0.0411899	0.18788
POSITIVE REGULATION OF INNATE IMMUNE RESPONSE GOBP GO:0045089	48	0.329558	1.40849	0.0488889	0.188783
NEUTROPHIL DEGRANULATION GOBP GO:0043312	119	0.266533	1.40675	0.014742	0.190177
HALLMARK_XENOBIOTIC_METABOLISM MSIGDB_C2 HALLMARK_XENOBIOTIC_METABOLISM	42	0.337495	1.40457	0.0674157	0.192074
NEGATIVE REGULATION OF ENDOPEPTIDASE ACTIVITY GOBP GO:0010951	18	0.419226	1.40248	0.0861723	0.193795
REGULATION OF NITROGEN COMPOUND METABOLIC PROCESS GOBP GO:0051171	428	0.223816	1.40212	0	0.193598
HETEROCYCLE CATABOLIC PROCESS GOBP GO:0046700	95	0.276993	1.40018	0.0269058	0.195398
TRANSCRIPTIONAL REGULATION BY RUNX3 REACTOME DATABASE ID RELEASE 71 8878159	24	0.395825	1.39853	0.0653061	0.196808
CELLULAR RESPONSE TO STIMULUS GOBP GO:0051716	442	0.225358	1.39835	0.00235849	0.196424
PEROXISOMAL PROTEIN IMPORT REACTOME DATABASE ID RELEASE 71 9033241	15	0.447948	1.39781	0.0893617	0.196513
PI3K AKT SIGNALING REACTOME R-HSA-1257604.8	36	0.349915	1.3973	0.0879541	0.19648
POSITIVE REGULATION OF ORGANELLE ORGANIZATION GOBP GO:0010638	87	0.282458	1.39481	0.0256959	0.198677
LEUKOCYTE ACTIVATION INVOLVED IN IMMUNE RESPONSE GOBP GO:0002366	122	0.265985	1.39446	0.0247748	0.198455
REGULATION OF LYMPHOCYTE ACTIVATION GOBP GO:0051249	23	0.390273	1.39423	0.0901804	0.198159
INTRACELLULAR SIGNALING BY SECOND MESSENGERS REACTOME R-HSA-9006925.3	38	0.341224	1.39407	0.0861345	0.197785
REGULATION OF PROTEASOMAL PROTEIN CATABOLIC PROCESS GOBP GO:0061136	27	0.373478	1.39246	0.0674847	0.198967
PURINE RIBONUCLEOTIDE BIOSYNTHETIC PROCESS GOBP GO:0009152	30	0.360397	1.39243	0.07173	0.198445
SIGNALING BY NOTCH4 REACTOME R-HSA-9013694.2	25	0.383614	1.39241	0.0912951	0.197892
CELL ACTIVATION INVOLVED IN IMMUNE RESPONSE GOBP GO:0002263	123	0.265756	1.39235	0.037037	0.197416
NEGATIVE REGULATION OF SECRETION GOBP GO:0051048	16	0.436368	1.39118	0.0981595	0.198224
TRANSITION METAL ION HOMEOSTASIS GOBP GO:0055076	16	0.436294	1.39087	0.100402	0.197974
GRANULOCYTE ACTIVATION GOBP GO:0036230	119	0.266533	1.39017	0.0307018	0.198277
POSITIVE REGULATION OF INTRACELLULAR PROTEIN TRANSPORT GOBP GO:0090316	19	0.414026	1.38846	0.102296	0.199661
CELLULAR NITROGEN COMPOUND METABOLIC PROCESS GOBP GO:0034641	399	0.226204	1.38803	0.010101	0.19966
G2 M TRANSITION REACTOME R-HSA-69275.5	42	0.327269	1.38763	0.0777778	0.199531
NUCLEOBASE-CONTAINING COMPOUND CATABOLIC PROCESS GOBP GO:0034655	89	0.279607	1.38717	0.0339367	0.199485
NEUTROPHIL ACTIVATION GOBP GO:0042119	119	0.266533	1.38372	0.0212766	0.202644
SMALL MOLECULE BIOSYNTHETIC PROCESS GOBP GO:0044283	87	0.280653	1.38344	0.0326087	0.202444
MITOTIC G2-G2 M PHASES REACTOME R-HSA-453274.2	42	0.327269	1.38279	0.0762332	0.202491
CELLULAR RESPONSE TO BIOTIC STIMULUS GOBP GO:0071216	15	0.433218	1.38078	0.114688	0.204141
REGULATION OF TRANSMEMBRANE TRANSPORT GOBP GO:0034762	28	0.365354	1.38008	0.0858369	0.204435
POSITIVE REGULATION OF CELLULAR PROTEIN METABOLIC PROCESS GOBP GO:0032270	127	0.26133	1.37953	0.0356347	0.204501
TP53 REGULATES METABOLIC GENES REACTOME DATABASE ID RELEASE 71 5628897	21	0.393241	1.37873	0.10387	0.204909
POSITIVE REGULATION OF PHOSPHORYLATION GOBP GO:0042327	59	0.30501	1.37872	0.070615	0.204359
CILIUM ASSEMBLY REACTOME DATABASE ID RELEASE 71 5617833	20	0.402535	1.37684	0.101732	0.205969
REGULATION OF CELLULAR PROTEIN CATABOLIC PROCESS GOBP GO:1903362	38	0.323657	1.37576	0.0684647	0.206746
REGULATION OF TRANSFERASE ACTIVITY GOBP GO:0051338	73	0.282661	1.37488	0.0576923	0.207209
POSITIVE REGULATION OF PROTEIN METABOLIC PROCESS GOBP GO:0051247	139	0.253154	1.37482	0.0264317	0.206701
REGULATION OF TRANSMEMBRANE TRANSPORTER ACTIVITY GOBP GO:0022898	19	0.406745	1.37293	0.0912779	0.20837
CELLULAR NITROGEN COMPOUND CATABOLIC PROCESS GOBP GO:0044270	96	0.275266	1.37231	0.034965	0.20848
POSITIVE REGULATION OF RESPONSE TO STIMULUS GOBP GO:0048584	165	0.247318	1.37026	0.0240175	0.210391
NEGATIVE REGULATION OF CYTOKINE PRODUCTION GOBP GO:0001818	19	0.403081	1.3681	0.0875274	0.212482
SPINAL CORD INJURY WIKIPATHWAYS_20191210 WP2431 HOMO SAPIENS	16	0.427621	1.36767	0.0941176	0.212438
TRANSLATION FACTORS WIKIPATHWAYS_20191210 WP107 HOMO SAPIENS	20	0.393476	1.36654	0.108384	0.213249
ORGANIC CYCLIC COMPOUND METABOLIC PROCESS GOBP GO:1901360	360	0.221796	1.36324	0.00677201	0.216772
POSITIVE REGULATION OF RNA METABOLIC PROCESS GOBP GO:0051254	85	0.276646	1.36283	0.0464135	0.216719
REGULATION OF TRANSPORTER ACTIVITY GOBP GO:0032409	19	0.406745	1.36216	0.133874	0.216954
IMMUNE EFFECTOR PROCESS GOBP GO:0002252	141	0.253532	1.3621	0.0266075	0.216462
REGULATION OF RESPONSE TO STRESS GOBP GO:0080134	169	0.243748	1.36162	0.0243363	0.216514
REGULATION OF DNA METABOLIC PROCESS GOBP GO:0051052	38	0.331731	1.36135	0.0903226	0.216307
REGULATION OF PROTEIN SECRETION GOBP GO:0050708	30	0.350909	1.3562	0.0934183	0.221941
APOPTOSIS SIGNALING PATHWAY PANTHER PATHWAY P00006	15	0.420011	1.35498	0.112069	0.222856
NEGATIVE REGULATION OF PHOSPHORUS METABOLIC PROCESS GOBP GO:0010563	45	0.311952	1.35484	0.0777311	0.222415
DNA DAMAGE RESPONSE (ONLY ATM DEPENDENT) WIKIPATHWAYS_20191210 WP710 HOMO SAPIENS	15	0.420586	1.35474	0.113546	0.221962
REGULATION OF ESTABLISHMENT OF PROTEIN LOCALIZATION GOBP GO:0070201	74	0.285372	1.35437	0.0772532	0.221893
REGULATION OF MEMBRANE PERMEABILITY GOBP GO:0090559	15	0.425227	1.35379	0.110204	0.222068
ORGANOPHOSPHATE METABOLIC PROCESS GOBP GO:0019637	136	0.252909	1.35167	0.0316742	0.224176
TRANSCRIPTIONAL REGULATION BY TP53 REACTOME R-HSA-3700989.6	46	0.302553	1.35008	0.0877193	0.225538
POSITIVE REGULATION OF METABOLIC PROCESS GOBP GO:0009893	269	0.22992	1.34894	0.0140187	0.226298
NUCLEOBASE-CONTAINING SMALL MOLECULE METABOLIC PROCESS GOBP GO:0055086	135	0.251631	1.34879	0.0377778	0.225912
REGULATION OF PEPTIDE SECRETION GOBP GO:0002791	30	0.350909	1.3468	0.115217	0.227734
REGULATION OF PROTEIN METABOLIC PROCESS GOBP GO:0051246	239	0.231851	1.34348	0.0229885	0.231493
REGULATION OF PRIMARY METABOLIC PROCESS GOBP GO:0080090	443	0.215563	1.34257	0.0091954	0.232092
RESPONSE TO VIRUS GOBP GO:0009615	21	0.383549	1.34021	0.122056	0.234481
PURINE-CONTAINING COMPOUND BIOSYNTHETIC PROCESS GOBP GO:0072522	35	0.337762	1.33977	0.0912863	0.234436
REGULATION OF CELLULAR COMPONENT SIZE GOBP GO:0032535	50	0.304632	1.33931	0.0883621	0.234432
REGULATION OF CELL CYCLE PHASE TRANSITION GOBP GO:1901987	60	0.294326	1.33929	0.0837004	0.233863
POSITIVE REGULATION OF MULTICELLULAR ORGANISMAL PROCESS GOBP GO:0051240	99	0.26536	1.33904	0.0453515	0.233581
POSITIVE REGULATION OF PROTEIN PHOSPHORYLATION GOBP GO:0001934	51	0.305647	1.33784	0.092827	0.234465
POSITIVE REGULATION OF CATALYTIC ACTIVITY GOBP GO:0043085	103	0.26184	1.33592	0.0609481	0.236365
POSITIVE REGULATION OF MACROMOLECULE BIOSYNTHETIC PROCESS GOBP GO:0010557	112	0.257233	1.33455	0.0597015	0.23748
TRANSCRIPTIONAL REGULATION BY RUNX2 REACTOME DATABASE ID RELEASE 71 8878166	32	0.350734	1.33266	0.104743	0.23931
NEGATIVE REGULATION OF RESPONSE TO STIMULUS GOBP GO:0048585	135	0.253457	1.33239	0.0402685	0.239076
REGULATED EXOCYTOSIS GOBP GO:0045055	147	0.247039	1.33228	0.0534521	0.23864
POSITIVE REGULATION OF NUCLEIC ACID-TEMPLATED TRANSCRIPTION GOBP GO:1903508	76	0.277283	1.33011	0.0523918	0.24082
MODIFICATION OF MORPHOLOGY OR PHYSIOLOGY OF OTHER ORGANISM GOBP GO:0035821	16	0.411942	1.32805	0.158996	0.243068
REGULATION OF ACTIN FILAMENT LENGTH GOBP GO:0030832	38	0.324505	1.32735	0.118952	0.243411
REGULATION OF PROTEIN MODIFICATION PROCESS GOBP GO:0031399	126	0.251851	1.32619	0.0401786	0.244409
REGULATION OF ACTIN POLYMERIZATION OR DEPOLYMERIZATION GOBP GO:0008064	38	0.324505	1.32522	0.10352	0.245104
REGULATION OF ESTABLISHMENT OF PROTEIN LOCALIZATION TO MITOCHONDRION GOBP GO:1903747	17	0.405635	1.32416	0.124236	0.245977
POSITIVE REGULATION OF RNA BIOSYNTHETIC PROCESS GOBP GO:1902680	76	0.277283	1.32197	0.0597345	0.248219
POSITIVE REGULATION OF TRANSCRIPTION, DNA-TEMPLATED GOBP GO:0045893	76	0.277283	1.32152	0.0783898	0.248198
REGULATION OF T CELL ACTIVATION GOBP GO:0050863	20	0.385524	1.31863	0.154321	0.251406
REGULATION OF CELLULAR METABOLIC PROCESS GOBP GO:0031323	450	0.211488	1.31773	0.00476191	0.252077
REGULATION OF PROTEIN LOCALIZATION TO NUCLEUS GOBP GO:1900180	17	0.412694	1.31601	0.133333	0.253849
NEUTROPHIL DEGRANULATION REACTOME R-HSA-6798695.2	118	0.253419	1.31401	0.0453608	0.255961
REGULATION OF SECRETION GOBP GO:0051046	42	0.314194	1.31301	0.122056	0.256657
POSITIVE REGULATION OF PROTEIN TRANSPORT GOBP GO:0051222	36	0.32387	1.30908	0.130901	0.261378
REGULATION OF DNA-BINDING TRANSCRIPTION FACTOR ACTIVITY GOBP GO:0051090	31	0.340922	1.30758	0.120833	0.262884
PURINE NUCLEOTIDE BIOSYNTHETIC PROCESS GOBP GO:0006164	33	0.328843	1.30697	0.122153	0.263122
HALLMARK_GLYCOLYSIS MSIGDB_C2 HALLMARK_GLYCOLYSIS	53	0.292931	1.30624	0.0920502	0.263406
NEGATIVE REGULATION OF PROTEIN METABOLIC PROCESS GOBP GO:0051248	98	0.258197	1.30302	0.0726872	0.267252
MACROAUTOPHAGY REACTOME DATABASE ID RELEASE 71 1632852	15	0.403274	1.30254	0.143426	0.267269
CELLULAR RESPONSE TO EXTERNAL STIMULUS GOBP GO:0071496	17	0.404307	1.29937	0.146237	0.271195
REGULATION OF PROTEOLYSIS INVOLVED IN CELLULAR PROTEIN CATABOLIC PROCESS GOBP GO:1903050	31	0.335787	1.29926	0.109649	0.270708
POSITIVE REGULATION OF CELLULAR PROCESS GOBP GO:0048522	426	0.211636	1.29914	0.00952381	0.270248
HALLMARK_G2M_CHECKPOINT MSIGDB_C2 HALLMARK_G2M_CHECKPOINT	32	0.332151	1.29906	0.116601	0.269719
EXOCYTOSIS GOBP GO:0006887	153	0.237905	1.29809	0.0464602	0.270496
REGULATION OF INNATE IMMUNE RESPONSE GOBP GO:0045088	54	0.292737	1.29774	0.0958333	0.27038
PROTEIN PHOSPHORYLATION GOBP GO:0006468	62	0.277995	1.29623	0.0986842	0.27181
REGULATION OF SECRETION BY CELL GOBP GO:1903530	42	0.314194	1.29374	0.118143	0.274781
DISEASES OF SIGNAL TRANSDUCTION REACTOME R-HSA-5663202.5	51	0.294376	1.29365	0.126106	0.274268
METHYLATION GOBP GO:0032259	20	0.376961	1.29345	0.15275	0.273921
CARBOHYDRATE METABOLISM REACTOME R-HSA-71387.9	67	0.278304	1.29293	0.10596	0.274027
FAS IOB FAS	25	0.351053	1.2892	0.13363	0.278934
ORGANIC ACID BIOSYNTHETIC PROCESS GOBP GO:0016053	51	0.291129	1.2876	0.110647	0.280602
NUCLEIC ACID METABOLIC PROCESS GOBP GO:0090304	195	0.227627	1.28647	0.0405728	0.281558
CLASS I MHC MEDIATED ANTIGEN PROCESSING & PRESENTATION REACTOME R-HSA-983169.3	47	0.298205	1.28208	0.122449	0.287457
HETEROCYCLE METABOLIC PROCESS GOBP GO:0046483	345	0.2106	1.28189	0.0193237	0.287085
SECRETION BY CELL GOBP GO:0032940	165	0.23055	1.28167	0.0439815	0.286794
NEGATIVE REGULATION OF PHOSPHATE METABOLIC PROCESS GOBP GO:0045936	44	0.298087	1.27872	0.116832	0.290743
REGULATION OF GROWTH GOBP GO:0040008	33	0.321313	1.27851	0.135628	0.290392
NEGATIVE REGULATION OF PROTEIN MODIFICATION PROCESS GOBP GO:0031400	52	0.28549	1.27841	0.116998	0.289873
REGULATION OF PROTEIN COMPLEX ASSEMBLY GOBP GO:0043254	71	0.269363	1.27807	0.105708	0.289771
REGULATION OF CATION TRANSMEMBRANE TRANSPORT GOBP GO:1904062	22	0.356754	1.2747	0.164927	0.294261
REGULATION OF TRANSCRIPTION, DNA-TEMPLATED GOBP GO:0006355	176	0.229219	1.27274	0.052506	0.296636
POSITIVE REGULATION OF MAPK CASCADE GOBP GO:0043410	25	0.340322	1.26976	0.158351	0.300586
CELLULAR RESPONSE TO OXIDATIVE STRESS GOBP GO:0034599	27	0.338229	1.26942	0.144213	0.300374
CARBOXYLIC ACID BIOSYNTHETIC PROCESS GOBP GO:0046394	51	0.291129	1.26911	0.124197	0.300176
SECRETION GOBP GO:0046903	166	0.229903	1.26589	0.0658174	0.304538
POSITIVE REGULATION OF TRANSPORT GOBP GO:0051050	89	0.253482	1.2644	0.0882353	0.306233
NEGATIVE REGULATION OF PROTEIN COMPLEX ASSEMBLY GOBP GO:0031333	22	0.353412	1.26325	0.166667	0.307326
HALLMARK_MTORC1_SIGNALING MSIGDB_C2 HALLMARK_MTORC1_SIGNALING	73	0.267043	1.26288	0.121896	0.30724
REGULATION OF ION TRANSPORT GOBP GO:0043269	32	0.318157	1.26118	0.158228	0.309246
REGULATION OF MACROMOLECULE METABOLIC PROCESS GOBP GO:0060255	462	0.203696	1.26071	0.0230769	0.309323
POSITIVE REGULATION OF MACROMOLECULE METABOLIC PROCESS GOBP GO:0010604	240	0.218653	1.25914	0.0321839	0.311092
CELL CYCLE REACTOME DATABASE ID RELEASE 71 1640170	93	0.248802	1.25798	0.0945055	0.312287
REGULATION OF ACTIN FILAMENT POLYMERIZATION GOBP GO:0030833	35	0.312945	1.25736	0.149675	0.312668
HALLMARK_IL2_STAT5_SIGNALING MSIGDB_C2 HALLMARK_IL2_STAT5_SIGNALING	28	0.330873	1.25427	0.16	0.316876
REGULATION OF ION TRANSMEMBRANE TRANSPORT GOBP GO:0034765	23	0.349374	1.25419	0.185417	0.316335
POSITIVE REGULATION OF PROTEIN MODIFICATION BY SMALL PROTEIN CONJUGATION OR REMOVAL GOBP GO:1903322	16	0.380352	1.25388	0.187773	0.316146
INNATE IMMUNE SYSTEM REACTOME DATABASE ID RELEASE 71 168249	189	0.222979	1.25334	0.0502283	0.316374
REGULATION OF UBIQUITIN-DEPENDENT PROTEIN CATABOLIC PROCESS GOBP GO:2000058	25	0.340664	1.2523	0.134361	0.317408
POSITIVE REGULATION OF TRANSCRIPTION BY RNA POLYMERASE II GOBP GO:0045944	51	0.287819	1.24987	0.146341	0.32061
CELL ACTIVATION GOBP GO:0001775	149	0.227803	1.24929	0.0593407	0.320764
RESPONSE TO OXIDATIVE STRESS GOBP GO:0006979	40	0.302828	1.2462	0.144554	0.325245
REGULATION OF PROTEIN BINDING GOBP GO:0043393	24	0.350458	1.24579	0.177686	0.325255
PROTEASOMAL PROTEIN CATABOLIC PROCESS GOBP GO:0010498	51	0.282816	1.24441	0.148536	0.326905
PHOSPHOLIPID METABOLIC PROCESS GOBP GO:0006644	17	0.378461	1.24317	0.167347	0.328189
POSITIVE REGULATION OF LYMPHOCYTE ACTIVATION GOBP GO:0051251	18	0.374118	1.24236	0.205418	0.328803
TCF DEPENDENT SIGNALING IN RESPONSE TO WNT REACTOME DATABASE ID RELEASE 71 201681	33	0.315209	1.24146	0.177489	0.329589
RESPONSE TO LIPOPOLYSACCHARIDE GOBP GO:0032496	17	0.378096	1.23958	0.177874	0.332042
UB-SPECIFIC PROCESSING PROTEASES REACTOME R-HSA-5689880.2	35	0.309566	1.23834	0.16	0.333345
CYTOKINE SIGNALING IN IMMUNE SYSTEM REACTOME R-HSA-1280215.4	113	0.237476	1.23819	0.103211	0.332876
REGULATION OF PROTEASOMAL UBIQUITIN-DEPENDENT PROTEIN CATABOLIC PROCESS GOBP GO:0032434	22	0.349979	1.23782	0.179431	0.332815
POSITIVE REGULATION OF HYDROLASE ACTIVITY GOBP GO:0051345	55	0.278202	1.23612	0.15812	0.335006
RESPONSE TO MOLECULE OF BACTERIAL ORIGIN GOBP GO:0002237	17	0.378096	1.23484	0.19697	0.336426
MITOTIC CELL CYCLE PROCESS GOBP GO:1903047	64	0.26821	1.23481	0.142222	0.335758
CHROMATIN REMODELING GOBP GO:0006338	17	0.378982	1.23349	0.209393	0.337268
REGULATION OF PROTEIN POLYMERIZATION GOBP GO:0032271	41	0.297113	1.23174	0.181425	0.339427
TCR NETPATH TCR	47	0.283465	1.23088	0.147917	0.340178
REGULATION OF CELL DEATH GOBP GO:0010941	148	0.227188	1.23042	0.0880361	0.340176
SIGNALING BY NOTCH REACTOME DATABASE ID RELEASE 71 157118	30	0.320682	1.23037	0.174569	0.339568
REGULATION OF INTRACELLULAR TRANSPORT GOBP GO:0032386	44	0.292787	1.23029	0.162055	0.338981
CELL CYCLE CHECKPOINTS REACTOME R-HSA-69620.2	48	0.282696	1.23011	0.161426	0.338594
COFACTOR BIOSYNTHETIC PROCESS GOBP GO:0051188	47	0.2828	1.22894	0.163522	0.339883
RESPONSE TO BACTERIUM GOBP GO:0009617	23	0.345252	1.2287	0.180851	0.339626
NEGATIVE REGULATION OF BIOLOGICAL PROCESS GOBP GO:0048519	435	0.199611	1.22623	0.0378251	0.34306
PTEN REGULATION REACTOME DATABASE ID RELEASE 71 6807070	28	0.31747	1.22217	0.195426	0.348827
REGULATION OF CELLULAR MACROMOLECULE BIOSYNTHETIC PROCESS GOBP GO:2000112	230	0.211257	1.22068	0.0769231	0.350714
REGULATION OF NUCLEIC ACID-TEMPLATED TRANSCRIPTION GOBP GO:1903506	178	0.219115	1.21976	0.0964126	0.35163
IMMUNE SYSTEM PROCESS GOBP GO:0002376	242	0.207243	1.21887	0.0758294	0.352372
NEGATIVE REGULATION OF NITROGEN COMPOUND METABOLIC PROCESS GOBP GO:0051172	167	0.22056	1.2153	0.0972222	0.357841
NUCLEOTIDE METABOLIC PROCESS GOBP GO:0009117	116	0.233012	1.21528	0.116071	0.357157
REGULATION OF RNA BIOSYNTHETIC PROCESS GOBP GO:2001141	179	0.217061	1.21479	0.104369	0.357295
PYRUVATE METABOLIC PROCESS GOBP GO:0006090	32	0.311268	1.21278	0.174274	0.360057
RESPONSE TO STRESS GOBP GO:0006950	267	0.207038	1.20947	0.0861678	0.364971
RNA POLYMERASE II TRANSCRIPTION REACTOME R-HSA-73857.5	107	0.235753	1.20864	0.147651	0.365795
HALLMARK_HYPOXIA MSIGDB_C2 HALLMARK_HYPOXIA	42	0.292063	1.20846	0.17226	0.365358
REGULATION OF REACTIVE OXYGEN SPECIES METABOLIC PROCESS GOBP GO:2000377	16	0.373987	1.207	0.219802	0.367261
NUCLEOSIDE PHOSPHATE METABOLIC PROCESS GOBP GO:0006753	116	0.233012	1.20694	0.136771	0.366673
PEPTIDYL-LYSINE MODIFICATION GOBP GO:0018205	40	0.287389	1.20532	0.195402	0.368803
REGULATION OF TRANSPORT GOBP GO:0051049	144	0.224923	1.20495	0.12	0.36884
MITOTIC CELL CYCLE GOBP GO:0000278	70	0.253104	1.19866	0.18239	0.379287
REGULATION OF PROTEIN LOCALIZATION GOBP GO:0032880	104	0.233881	1.19843	0.138824	0.378941
PROTEOLYSIS INVOLVED IN CELLULAR PROTEIN CATABOLIC PROCESS GOBP GO:0051603	68	0.259019	1.1969	0.18451	0.381033
MAPK SIGNALING PATHWAY WIKIPATHWAYS_20191210 WP382 HOMO SAPIENS	24	0.330937	1.19623	0.226923	0.381508
SULFUR COMPOUND BIOSYNTHETIC PROCESS GOBP GO:0044272	29	0.308862	1.19577	0.224101	0.381517
POSITIVE REGULATION OF CELL PROLIFERATION GOBP GO:0008284	55	0.26766	1.1934	0.18	0.385232
POSITIVE REGULATION OF PROTEOLYSIS GOBP GO:0045862	41	0.287011	1.19234	0.194384	0.386417
GENERIC TRANSCRIPTION PATHWAY REACTOME R-HSA-212436.9	95	0.236546	1.19092	0.161504	0.388278
POSITIVE REGULATION OF ENDOPEPTIDASE ACTIVITY GOBP GO:0010950	22	0.337693	1.1901	0.22766	0.389117
REGULATION OF ANATOMICAL STRUCTURE SIZE GOBP GO:0090066	55	0.264461	1.18952	0.183585	0.389421
COENZYME BIOSYNTHETIC PROCESS GOBP GO:0009108	35	0.293875	1.18941	0.186551	0.388882
RESPONSE TO ORGANIC SUBSTANCE GOBP GO:0010033	224	0.206091	1.18766	0.103139	0.391368
REGULATION OF MAP KINASE ACTIVITY GOBP GO:0043405	23	0.333042	1.1866	0.233853	0.392505
ORGANIC SUBSTANCE CATABOLIC PROCESS GOBP GO:1901575	268	0.202491	1.18516	0.118993	0.39431
REGULATION OF IMMUNE SYSTEM PROCESS GOBP GO:0002682	126	0.22544	1.18412	0.139588	0.395497
NEGATIVE REGULATION OF CATALYTIC ACTIVITY GOBP GO:0043086	68	0.254552	1.1836	0.180258	0.395678
NEGATIVE REGULATION OF INTRACELLULAR SIGNAL TRANSDUCTION GOBP GO:1902532	44	0.277451	1.18235	0.209607	0.397244
REGULATION OF INFLAMMATORY RESPONSE GOBP GO:0050727	21	0.3407	1.1823	0.230444	0.396543
NEGATIVE REGULATION OF CELL DEATH GOBP GO:0060548	94	0.237495	1.18217	0.178971	0.396044
REGULATION OF ORGANELLE ASSEMBLY GOBP GO:1902115	25	0.32952	1.18138	0.229645	0.396749
PHOSPHORYLATION GOBP GO:0016310	110	0.229642	1.17723	0.16408	0.403595
REGULATION OF MAPK CASCADE GOBP GO:0043408	40	0.283604	1.17549	0.211663	0.406155
HALLMARK_PEROXISOME MSIGDB_C2 HALLMARK_PEROXISOME	30	0.305037	1.17539	0.226374	0.405578
TOLL-LIKE RECEPTOR CASCADES REACTOME R-HSA-168898.6	16	0.368993	1.17494	0.261856	0.40561
NEGATIVE REGULATION OF IMMUNE SYSTEM PROCESS GOBP GO:0002683	24	0.322462	1.17096	0.230303	0.412405
NEGATIVE REGULATION OF CELLULAR METABOLIC PROCESS GOBP GO:0031324	176	0.211772	1.16958	0.131696	0.414332
HALLMARK_E2F_TARGETS MSIGDB_C2 HALLMARK_E2F_TARGETS	38	0.282032	1.1683	0.223382	0.41607
CELLULAR RESPONSE TO ORGANIC SUBSTANCE GOBP GO:0071310	192	0.206382	1.16663	0.128146	0.418436
COFACTOR METABOLIC PROCESS GOBP GO:0051186	111	0.224279	1.1659	0.169565	0.419075
RESPONSE TO EXTERNAL STIMULUS GOBP GO:0009605	92	0.237199	1.16497	0.183932	0.420056
REGULATION OF PROGRAMMED CELL DEATH GOBP GO:0043067	138	0.218322	1.1642	0.179601	0.420866
NEGATIVE REGULATION OF SIGNAL TRANSDUCTION GOBP GO:0009968	108	0.227327	1.16382	0.174946	0.420856
REGULATION OF MACROMOLECULE BIOSYNTHETIC PROCESS GOBP GO:0010556	238	0.199134	1.16322	0.115207	0.421263
NEGATIVE REGULATION OF CELL COMMUNICATION GOBP GO:0010648	112	0.2216	1.16206	0.159091	0.42263
NEGATIVE REGULATION OF PROTEIN POLYMERIZATION GOBP GO:0032272	16	0.356484	1.16044	0.257937	0.424925
AUTOPHAGY REACTOME R-HSA-9612973.1	19	0.338485	1.15951	0.242424	0.425838
REGULATION OF CELL PROLIFERATION GOBP GO:0042127	84	0.239819	1.1593	0.195604	0.425494
RESPONSE TO INSULIN GOBP GO:0032868	19	0.336042	1.15917	0.258317	0.424963
NEGATIVE REGULATION OF MULTICELLULAR ORGANISMAL PROCESS GOBP GO:0051241	81	0.241433	1.15866	0.208333	0.425167
NUCLEOSIDE TRIPHOSPHATE METABOLIC PROCESS GOBP GO:0009141	62	0.249706	1.15686	0.22449	0.427959
REGULATION OF CELL ACTIVATION GOBP GO:0050865	27	0.308082	1.15614	0.251534	0.428676
CELL CYCLE, MITOTIC REACTOME DATABASE ID RELEASE 71 69278	82	0.235918	1.156	0.216102	0.428159
CATABOLIC PROCESS GOBP GO:0009056	294	0.194809	1.15575	0.136919	0.427862
CELLULAR RESPONSE TO HYPOXIA GOBP GO:0071456	35	0.285282	1.15537	0.239496	0.427897
POSITIVE REGULATION OF T CELL ACTIVATION GOBP GO:0050870	15	0.363536	1.15529	0.268627	0.42725
NEGATIVE REGULATION OF CELL CYCLE PHASE TRANSITION GOBP GO:1901988	37	0.277568	1.1548	0.248988	0.427351
ERK1 ERK2 PATHWAY REACTOME DATABASE ID RELEASE 71 5684996	40	0.278639	1.15367	0.236287	0.428912
BRAIN-DERIVED NEUROTROPHIC FACTOR (BDNF) SIGNALING PATHWAY WIKIPATHWAYS_20191210 WP2380 HOMO SAPIENS	15	0.374783	1.15116	0.273486	0.433037
REGULATION OF STEM CELL DIFFERENTIATION GOBP GO:2000736	24	0.316013	1.1502	0.252632	0.434211
REGULATION OF G1/S TRANSITION OF MITOTIC CELL CYCLE GOBP GO:2000045	19	0.336559	1.14979	0.263713	0.434217
REGULATION OF ORGANELLE ORGANIZATION GOBP GO:0033043	152	0.212653	1.14902	0.170068	0.435073
REGULATION OF RESPONSE TO STIMULUS GOBP GO:0048583	316	0.19213	1.14887	0.139269	0.434608
POSITIVE REGULATION OF APOPTOTIC SIGNALING PATHWAY GOBP GO:2001235	24	0.318913	1.14873	0.26898	0.43413
MITOCHONDRIAL MEMBRANE ORGANIZATION GOBP GO:0007006	17	0.35366	1.14832	0.282051	0.434137
NEGATIVE REGULATION OF MITOTIC CELL CYCLE PHASE TRANSITION GOBP GO:1901991	36	0.280256	1.14755	0.23913	0.434786
REGULATION OF LEUKOCYTE CELL-CELL ADHESION GOBP GO:1903037	20	0.328804	1.14749	0.253061	0.434138
NEGATIVE REGULATION OF WNT SIGNALING PATHWAY GOBP GO:0030178	34	0.289339	1.14574	0.264901	0.436962
NEGATIVE REGULATION OF PROGRAMMED CELL DEATH GOBP GO:0043069	89	0.229503	1.14573	0.217978	0.436214
FLT3 SIGNALING REACTOME R-HSA-9607240.3	41	0.275312	1.14308	0.274428	0.44081
HEPATITIS B INFECTION WIKIPATHWAYS_20191210 WP4666 HOMO SAPIENS	15	0.372398	1.14286	0.293139	0.440494
POSITIVE REGULATION OF ESTABLISHMENT OF PROTEIN LOCALIZATION GOBP GO:1904951	50	0.257217	1.14148	0.233051	0.442482
CELLULAR RESPONSE TO DECREASED OXYGEN LEVELS GOBP GO:0036294	35	0.285282	1.1398	0.272152	0.445187
REGULATION OF LEUKOCYTE ACTIVATION GOBP GO:0002694	27	0.308082	1.13925	0.270386	0.4455
NEGATIVE REGULATION OF SIGNALING GOBP GO:0023057	113	0.220945	1.1385	0.210638	0.446193
MITOTIC ANAPHASE REACTOME DATABASE ID RELEASE 71 68882	39	0.272396	1.1368	0.247423	0.448844
REGULATION OF PHOSPHORUS METABOLIC PROCESS GOBP GO:0051174	140	0.21476	1.13607	0.18559	0.449497
POSITIVE REGULATION OF LEUKOCYTE ACTIVATION GOBP GO:0002696	20	0.328174	1.13465	0.28252	0.451485
CELLULAR RESPONSES TO EXTERNAL STIMULI REACTOME DATABASE ID RELEASE 71 8953897	140	0.212179	1.13386	0.206972	0.452204
REGULATION OF SIGNAL TRANSDUCTION GOBP GO:0009966	221	0.201222	1.13301	0.184685	0.453143
RAF MAP KINASE CASCADE REACTOME DATABASE ID RELEASE 71 5673001	40	0.278639	1.13029	0.280738	0.457842
G2/M TRANSITION OF MITOTIC CELL CYCLE GOBP GO:0000086	22	0.314875	1.12954	0.305263	0.458602
REGULATION OF CELL COMMUNICATION GOBP GO:0010646	232	0.196196	1.12796	0.162637	0.460975
NUCLEOSIDE MONOPHOSPHATE METABOLIC PROCESS GOBP GO:0009123	57	0.252641	1.12796	0.242009	0.46018
NEGATIVE REGULATION OF MACROMOLECULE METABOLIC PROCESS GOBP GO:0010605	217	0.195319	1.126	0.179654	0.463392
MITOTIC METAPHASE AND ANAPHASE REACTOME DATABASE ID RELEASE 71 2555396	39	0.272396	1.12542	0.272177	0.463796
REGULATION OF CELLULAR RESPONSE TO STRESS GOBP GO:0080135	101	0.225065	1.12462	0.247619	0.46469
ESTABLISHMENT OF PROTEIN LOCALIZATION TO PEROXISOME GOBP GO:0072663	17	0.343003	1.12345	0.283096	0.466184
IMMUNE SYSTEM REACTOME R-HSA-168256.7	281	0.191615	1.1233	0.182028	0.465682
HALLMARK_CHOLESTEROL_HOMEOSTASIS MSIGDB_C2 HALLMARK_CHOLESTEROL_HOMEOSTASIS	18	0.339787	1.12326	0.290526	0.464958
CELL CYCLE G2/M PHASE TRANSITION GOBP GO:0044839	22	0.314875	1.12315	0.295503	0.464386
REGULATION OF APOPTOTIC PROCESS GOBP GO:0042981	135	0.209547	1.12287	0.217593	0.46412
CELLULAR HOMEOSTASIS GOBP GO:0019725	66	0.23814	1.1226	0.225225	0.463859
TRANSCRIPTIONAL REGULATION BY RUNX1 REACTOME R-HSA-8878171.3	32	0.286788	1.12237	0.259494	0.46354
RESPONSE TO ELEVATED PLATELET CYTOSOLIC CA2+ REACTOME R-HSA-76005.2	32	0.284413	1.11926	0.271605	0.469244
MAPK FAMILY SIGNALING CASCADES REACTOME DATABASE ID RELEASE 71 5683057	45	0.264102	1.11905	0.277328	0.468859
DEPHOSPHORYLATION GOBP GO:0016311	19	0.329624	1.11888	0.305882	0.468402
REGULATION OF SIGNALING GOBP GO:0023051	237	0.194191	1.11875	0.183486	0.467878
PEROXISOMAL TRANSPORT GOBP GO:0043574	17	0.343003	1.11798	0.291089	0.468616
POSITIVE REGULATION OF DNA-BINDING TRANSCRIPTION FACTOR ACTIVITY GOBP GO:0051091	22	0.31669	1.11641	0.311966	0.471116
POSITIVE REGULATION OF CELL ACTIVATION GOBP GO:0050867	20	0.328174	1.11441	0.293869	0.474368
REGULATION OF EPITHELIAL CELL PROLIFERATION GOBP GO:0050678	19	0.324982	1.11346	0.292339	0.475514
REGULATION OF PHOSPHATE METABOLIC PROCESS GOBP GO:0019220	139	0.209465	1.11337	0.232877	0.474913
PROTEIN TARGETING TO PEROXISOME GOBP GO:0006625	17	0.343003	1.1121	0.316348	0.47686
INTRACELLULAR SIGNAL TRANSDUCTION GOBP GO:0035556	121	0.212079	1.11202	0.223602	0.476226
PLATELET DEGRANULATION REACTOME DATABASE ID RELEASE 71 114608	32	0.284413	1.11158	0.275641	0.4764
GASTRIN SIGNALING PATHWAY WIKIPATHWAYS_20191210 WP4659 HOMO SAPIENS	18	0.337484	1.11156	0.302376	0.47564
CELL CYCLE PROCESS GOBP GO:0022402	79	0.23046	1.11156	0.28125	0.474863
REGULATION OF RNA METABOLIC PROCESS GOBP GO:0051252	216	0.19305	1.11104	0.21875	0.475153
SIG_INSULIN_RECEPTOR_PATHWAY_IN_CARDIAC_MYOCYTES MSIGDB_C2 SIG_INSULIN_RECEPTOR_PATHWAY_IN_CARDIAC_MYOCYTES	15	0.353414	1.11101	0.308911	0.47444
POSITIVE REGULATION OF PEPTIDASE ACTIVITY GOBP GO:0010952	24	0.298243	1.11067	0.302772	0.47433
CELL CYCLE GOBP GO:0007049	85	0.226566	1.11007	0.254945	0.474763
RIBONUCLEOPROTEIN COMPLEX ASSEMBLY GOBP GO:0022618	39	0.26748	1.10997	0.274262	0.474183
CELLULAR AMINO ACID CATABOLIC PROCESS GOBP GO:0009063	30	0.283179	1.10942	0.284783	0.474571
RESPONSE TO REACTIVE OXYGEN SPECIES GOBP GO:0000302	18	0.334445	1.10915	0.309572	0.474365
GLYCOLYSIS REACTOME DATABASE ID RELEASE 71 70171	34	0.276708	1.10899	0.292017	0.473888
CELLULAR RESPONSE TO ENVIRONMENTAL STIMULUS GOBP GO:0104004	22	0.311423	1.10765	0.300601	0.475895
REGULATION OF MITOTIC CELL CYCLE GOBP GO:0007346	76	0.228945	1.10536	0.292373	0.479906
REGULATION OF PROTEIN SERINE/THREONINE KINASE ACTIVITY GOBP GO:0071900	36	0.275504	1.10421	0.307843	0.481585
REGULATION OF KINASE ACTIVITY GOBP GO:0043549	54	0.248096	1.10227	0.279167	0.484879
GLYCEROLIPID METABOLIC PROCESS GOBP GO:0046486	19	0.327336	1.10032	0.311983	0.488126
CELLULAR COMPONENT DISASSEMBLY GOBP GO:0022411	54	0.246348	1.09952	0.296137	0.488944
METABOLIC REPROGRAMMING IN COLON CANCER WIKIPATHWAYS_20191210 WP4290 HOMO SAPIENS	31	0.283483	1.09903	0.338235	0.489129
POSITIVE REGULATION OF GROWTH GOBP GO:0045927	15	0.340339	1.09759	0.32998	0.491315
REGULATION OF NUCLEOBASE-CONTAINING COMPOUND METABOLIC PROCESS GOBP GO:0019219	263	0.185399	1.09639	0.258581	0.493057
REGULATION OF CYSTEINE-TYPE ENDOPEPTIDASE ACTIVITY GOBP GO:2000116	25	0.298882	1.09527	0.326489	0.494637
POSITIVE REGULATION OF IMMUNE SYSTEM PROCESS GOBP GO:0002684	92	0.223572	1.09492	0.280514	0.494528
PROTEIN LOCALIZATION TO PEROXISOME GOBP GO:0072662	17	0.343003	1.09377	0.338298	0.496178
POSITIVE REGULATION OF BIOLOGICAL PROCESS GOBP GO:0048518	477	0.175305	1.09176	0.20438	0.499601
RESPONSE TO RADIATION GOBP GO:0009314	23	0.308551	1.08924	0.316832	0.504027
POSITIVE REGULATION OF MULTI-ORGANISM PROCESS GOBP GO:0043902	21	0.317452	1.08905	0.342159	0.503629
REGULATION OF CELLULAR CATABOLIC PROCESS GOBP GO:0031329	135	0.205207	1.08788	0.270925	0.505292
REGULATION OF METAL ION TRANSPORT GOBP GO:0010959	24	0.296766	1.0869	0.340862	0.506556
CELLULAR RESPONSE TO ABIOTIC STIMULUS GOBP GO:0071214	22	0.311423	1.08549	0.332618	0.508774
REGULATION OF ACTIN FILAMENT-BASED PROCESS GOBP GO:0032970	66	0.234063	1.08331	0.302714	0.512768
REGULATION OF MULTICELLULAR ORGANISMAL DEVELOPMENT GOBP GO:2000026	139	0.200374	1.08314	0.284797	0.51229
APOPTOSIS REACTOME R-HSA-109581.3	52	0.242058	1.08174	0.315151	0.514625
REGULATION OF PROTEIN CATABOLIC PROCESS GOBP GO:0042176	49	0.251622	1.08057	0.310345	0.516428
ORGANONITROGEN COMPOUND BIOSYNTHETIC PROCESS GOBP GO:1901566	172	0.195463	1.07983	0.261283	0.517229
GLUCOSE METABOLISM REACTOME R-HSA-70326.8	40	0.258797	1.07914	0.329167	0.517865
MAINTENANCE OF LOCATION IN CELL GOBP GO:0051651	19	0.315646	1.07552	0.33996	0.524829
ORGANIC HYDROXY COMPOUND BIOSYNTHETIC PROCESS GOBP GO:1901617	17	0.327984	1.075	0.34252	0.5252
PEROXISOME ORGANIZATION GOBP GO:0007031	18	0.327726	1.07465	0.359667	0.525186
SULFUR COMPOUND METABOLIC PROCESS GOBP GO:0006790	69	0.228405	1.07464	0.313725	0.524375
SIGNAL TRANSDUCTION GOBP GO:0007165	308	0.179894	1.07378	0.253796	0.52532
POSITIVE REGULATION OF VIRAL PROCESS GOBP GO:0048524	18	0.325217	1.07343	0.367983	0.525324
ORGANELLE BIOGENESIS AND MAINTENANCE REACTOME DATABASE ID RELEASE 71 1852241	29	0.278079	1.07179	0.343681	0.528075
HALLMARK_HEME_METABOLISM MSIGDB_C2 HALLMARK_HEME_METABOLISM	30	0.27706	1.07173	0.333333	0.527366
RIBONUCLEOPROTEIN COMPLEX SUBUNIT ORGANIZATION GOBP GO:0071826	40	0.259109	1.07081	0.334694	0.52857
REGULATION OF PROTEIN KINASE ACTIVITY GOBP GO:0045859	49	0.244259	1.0701	0.368421	0.529373
REGULATION OF VIRAL LIFE CYCLE GOBP GO:1903900	20	0.315236	1.0693	0.375254	0.53029
IMMUNE RESPONSE-REGULATING SIGNALING PATHWAY GOBP GO:0002764	56	0.235419	1.06648	0.327766	0.53562
CELL COMMUNICATION GOBP GO:0007154	329	0.176146	1.06596	0.267819	0.535927
SIGNALING BY ROBO RECEPTORS REACTOME R-HSA-376176.4	70	0.223731	1.06468	0.342529	0.537946
REGULATION OF PROTEIN KINASE B SIGNALING GOBP GO:0051896	16	0.338231	1.06425	0.377083	0.538154
SMALL MOLECULE METABOLIC PROCESS GOBP GO:0044281	281	0.178538	1.06243	0.27685	0.541361
IMMUNE RESPONSE-ACTIVATING SIGNAL TRANSDUCTION GOBP GO:0002757	53	0.237581	1.05782	0.368192	0.550966
NEGATIVE REGULATION OF APOPTOTIC PROCESS GOBP GO:0043066	86	0.216857	1.05743	0.346154	0.550989
INTERACTION WITH HOST GOBP GO:0051701	15	0.326644	1.05625	0.390057	0.552823
NEGATIVE REGULATION OF METABOLIC PROCESS GOBP GO:0009892	237	0.183198	1.05612	0.309469	0.552241
REGULATION OF BIOSYNTHETIC PROCESS GOBP GO:0009889	275	0.179382	1.05571	0.317352	0.552311
POSITIVE REGULATION OF PROTEASOMAL UBIQUITIN-DEPENDENT PROTEIN CATABOLIC PROCESS GOBP GO:0032436	15	0.333389	1.05537	0.395112	0.552219
CELLULAR METAL ION HOMEOSTASIS GOBP GO:0006875	35	0.264269	1.05533	0.337449	0.551475
NEGATIVE REGULATION OF RESPONSE TO EXTERNAL STIMULUS GOBP GO:0032102	19	0.314119	1.05148	0.398357	0.559141
PROGRAMMED CELL DEATH REACTOME R-HSA-5357801.2	52	0.242058	1.04867	0.385809	0.564699
POSITIVE REGULATION OF PROTEASOMAL PROTEIN CATABOLIC PROCESS GOBP GO:1901800	15	0.333389	1.04785	0.402083	0.565627
NEGATIVE REGULATION OF CANONICAL WNT SIGNALING PATHWAY GOBP GO:0090090	32	0.267733	1.04448	0.392777	0.572329
POSITIVE REGULATION OF UBIQUITIN-DEPENDENT PROTEIN CATABOLIC PROCESS GOBP GO:2000060	15	0.333389	1.04391	0.394004	0.572779
CELLULAR DIVALENT INORGANIC CATION HOMEOSTASIS GOBP GO:0072503	21	0.301599	1.04146	0.416309	0.577509
REGULATION OF CELL GROWTH GOBP GO:0001558	26	0.276711	1.03948	0.37045	0.581187
POSITIVE REGULATION OF CELLULAR COMPONENT MOVEMENT GOBP GO:0051272	50	0.235243	1.03768	0.356522	0.584414
HALLMARK_COMPLEMENT MSIGDB_C2 HALLMARK_COMPLEMENT	35	0.257037	1.03465	0.402128	0.590363
REGULATION OF EPITHELIAL CELL MIGRATION GOBP GO:0010632	26	0.280719	1.03348	0.390438	0.592218
ER-PHAGOSOME PATHWAY REACTOME DATABASE ID RELEASE 71 1236974	27	0.274506	1.02978	0.420945	0.599947
POSITIVE REGULATION OF LOCOMOTION GOBP GO:0040017	53	0.232937	1.02889	0.426009	0.601229
NEGATIVE REGULATION OF CYTOSKELETON ORGANIZATION GOBP GO:0051494	24	0.286912	1.02825	0.40625	0.601804
MAINTENANCE OF PROTEIN LOCATION IN CELL GOBP GO:0032507	15	0.338767	1.02748	0.423729	0.602698
CELLULAR RESPONSE TO PEPTIDE HORMONE STIMULUS GOBP GO:0071375	21	0.295099	1.02667	0.422505	0.603731
POSITIVE REGULATION OF CELL MOTILITY GOBP GO:2000147	50	0.235243	1.02573	0.406926	0.605017
PURINE RIBONUCLEOSIDE MONOPHOSPHATE METABOLIC PROCESS GOBP GO:0009167	55	0.228254	1.02533	0.401656	0.605082
CELLULAR CATABOLIC PROCESS GOBP GO:0044248	279	0.173947	1.02425	0.39759	0.606744
REGULATION OF MULTICELLULAR ORGANISMAL PROCESS GOBP GO:0051239	221	0.180489	1.02402	0.40241	0.606406
RESPONSE TO PEPTIDE HORMONE GOBP GO:0043434	24	0.287603	1.02379	0.424116	0.606109
REGULATION OF TRANSCRIPTION BY RNA POLYMERASE II GOBP GO:0006357	111	0.199651	1.02246	0.412766	0.608426
PURINE NUCLEOSIDE MONOPHOSPHATE METABOLIC PROCESS GOBP GO:0009126	55	0.228254	1.02184	0.417978	0.608911
REGULATION OF CELLULAR BIOSYNTHETIC PROCESS GOBP GO:0031326	266	0.170493	1.02125	0.383372	0.609429
REGULATION OF NEURON PROJECTION DEVELOPMENT GOBP GO:0010975	28	0.266816	1.02123	0.432609	0.608613
REGULATION OF PROTEIN PHOSPHORYLATION GOBP GO:0001932	82	0.210239	1.02036	0.416838	0.609792
CELLULAR RESPONSES TO STRESS REACTOME DATABASE ID RELEASE 71 2262752	137	0.188262	1.01926	0.438326	0.611445
RIBONUCLEOSIDE MONOPHOSPHATE METABOLIC PROCESS GOBP GO:0009161	55	0.228254	1.01855	0.412134	0.612189
REGULATION OF CELL CYCLE GOBP GO:0051726	105	0.19875	1.01584	0.428571	0.617679
REGULATION OF CELL DIFFERENTIATION GOBP GO:0045595	128	0.190375	1.01578	0.425629	0.616885
SEPARATION OF SISTER CHROMATIDS REACTOME DATABASE ID RELEASE 71 2467813	37	0.247207	1.01542	0.43002	0.616863
REGULATION OF CELL CYCLE G1/S PHASE TRANSITION GOBP GO:1902806	20	0.296827	1.01225	0.435417	0.62343
REGULATION OF MEMBRANE POTENTIAL GOBP GO:0042391	22	0.284111	1.01099	0.440711	0.625493
APOPTOTIC SIGNALING PATHWAY GOBP GO:0097190	19	0.299823	1.01093	0.41875	0.624716
REGULATION OF EXPRESSION OF SLITS AND ROBOS REACTOME DATABASE ID RELEASE 71 9010553	58	0.221828	1.01005	0.441758	0.625918
REGULATION OF ACTIN FILAMENT ORGANIZATION GOBP GO:0110053	53	0.227462	1.00898	0.434599	0.627478
STEROID METABOLIC PROCESS GOBP GO:0008202	15	0.31593	1.00863	0.43662	0.627402
POSITIVE REGULATION OF IMMUNE RESPONSE GOBP GO:0050778	73	0.213049	1.00794	0.443678	0.628168
RESPONSE TO PEPTIDE GOBP GO:1901652	27	0.266873	1.00697	0.44902	0.629587
REGULATION OF SMALL MOLECULE METABOLIC PROCESS GOBP GO:0062012	80	0.208013	1.00595	0.455914	0.631034
REGULATION OF CATABOLIC PROCESS GOBP GO:0009894	144	0.184831	1.00493	0.419903	0.632576
POSITIVE REGULATION OF GENE EXPRESSION GOBP GO:0010628	136	0.186381	1.00105	0.446429	0.640882
PROTEIN MATURATION GOBP GO:0051604	21	0.293921	1.00031	0.445833	0.641653
POSITIVE REGULATION OF CELLULAR CATABOLIC PROCESS GOBP GO:0031331	34	0.249853	0.99917	0.475877	0.643357
POSITIVE REGULATION OF LEUKOCYTE CELL-CELL ADHESION GOBP GO:1903039	17	0.303654	0.994023	0.466527	0.654657
REGULATION OF ACTIN CYTOSKELETON ORGANIZATION GOBP GO:0032956	60	0.21868	0.993381	0.474012	0.655296
SIGNALING GOBP GO:0023052	325	0.165485	0.993296	0.475059	0.654553
POSITIVE REGULATION OF CELLULAR PROTEIN LOCALIZATION GOBP GO:1903829	50	0.226194	0.992046	0.455487	0.656511
POSITIVE REGULATION OF SECRETION GOBP GO:0051047	23	0.271778	0.989853	0.461698	0.660784
METABOLISM REACTOME R-HSA-1430728.9	373	0.161513	0.988707	0.487562	0.662611
NEGATIVE REGULATION OF CELL CYCLE PROCESS GOBP GO:0010948	44	0.235323	0.98832	0.468432	0.662592
REGULATION OF STRESS-ACTIVATED MAPK CASCADE GOBP GO:0032872	16	0.306312	0.987049	0.460922	0.664823
NEGATIVE REGULATION OF CELLULAR COMPONENT ORGANIZATION GOBP GO:0051129	72	0.205381	0.986381	0.487448	0.665489
PEPTIDYL-AMINO ACID MODIFICATION GOBP GO:0018193	70	0.207308	0.985516	0.480331	0.666619
ACTIVATION OF IMMUNE RESPONSE GOBP GO:0002253	61	0.217456	0.983996	0.488263	0.669445
COENZYME METABOLIC PROCESS GOBP GO:0006732	73	0.206392	0.983742	0.494357	0.669104
POSITIVE REGULATION OF NF-KAPPAB TRANSCRIPTION FACTOR ACTIVITY GOBP GO:0051092	16	0.303692	0.983611	0.490909	0.6685
CELLULAR RESPONSE TO PEPTIDE GOBP GO:1901653	24	0.271551	0.981359	0.468085	0.672939
POSITIVE REGULATION OF CELLULAR PROTEIN CATABOLIC PROCESS GOBP GO:1903364	22	0.273059	0.981205	0.456033	0.67238
CELLULAR RESPONSE TO INSULIN STIMULUS GOBP GO:0032869	18	0.291056	0.979396	0.457023	0.675887
ALPHA6BETA4INTEGRIN IOB ALPHA6BETA4INTEGRIN	15	0.305509	0.97802	0.48583	0.678288
POSITIVE REGULATION OF PROTEOLYSIS INVOLVED IN CELLULAR PROTEIN CATABOLIC PROCESS GOBP GO:1903052	16	0.302809	0.977589	0.494692	0.678395
REGULATION OF NEURON DIFFERENTIATION GOBP GO:0045664	33	0.243564	0.976822	0.487854	0.679342
NEGATIVE REGULATION OF CELL CYCLE GOBP GO:0045786	56	0.218182	0.976375	0.479744	0.6795
POSITIVE REGULATION OF SECRETION BY CELL GOBP GO:1903532	23	0.271778	0.973024	0.470942	0.686475
METAL ION HOMEOSTASIS GOBP GO:0055065	39	0.234679	0.972877	0.503254	0.685911
REGULATION OF IMMUNE RESPONSE GOBP GO:0050776	94	0.194963	0.972358	0.50308	0.68619
REGULATION OF STRESS-ACTIVATED PROTEIN KINASE SIGNALING CASCADE GOBP GO:0070302	16	0.306312	0.970897	0.510417	0.688744
APOPTOTIC PROCESS GOBP GO:0006915	41	0.235091	0.96942	0.490446	0.691314
PURINE NUCLEOSIDE TRIPHOSPHATE METABOLIC PROCESS GOBP GO:0009144	55	0.215508	0.96768	0.498925	0.69474
REGULATION OF RESPONSE TO WOUNDING GOBP GO:1903034	15	0.303241	0.96579	0.50211	0.698316
SUMOYLATION OF DNA DAMAGE RESPONSE AND REPAIR PROTEINS REACTOME R-HSA-3108214.2	23	0.267477	0.965748	0.502222	0.697453
CELL SURFACE RECEPTOR SIGNALING PATHWAY GOBP GO:0007166	170	0.174427	0.965075	0.541203	0.698208
REGULATION OF CYSTEINE-TYPE ENDOPEPTIDASE ACTIVITY INVOLVED IN APOPTOTIC PROCESS GOBP GO:0043281	24	0.265769	0.964112	0.491054	0.699481
RESPONSE TO OXYGEN-CONTAINING COMPOUND GOBP GO:1901700	87	0.193878	0.964028	0.522388	0.698737
CELLULAR RESPONSE TO OXYGEN-CONTAINING COMPOUND GOBP GO:1901701	72	0.198251	0.961364	0.536638	0.704079
REGULATION OF LEUKOCYTE MIGRATION GOBP GO:0002685	17	0.293988	0.958454	0.527607	0.710218
RIBOSE PHOSPHATE METABOLIC PROCESS GOBP GO:0019693	92	0.194567	0.957331	0.551948	0.712024
INNATE IMMUNE RESPONSE GOBP GO:0045087	18	0.284774	0.956914	0.504032	0.712069
NEGATIVE REGULATION OF ORGANELLE ORGANIZATION GOBP GO:0010639	40	0.230706	0.956661	0.501071	0.711674
NEGATIVE REGULATION OF CELLULAR MACROMOLECULE BIOSYNTHETIC PROCESS GOBP GO:2000113	74	0.196767	0.953201	0.547826	0.719045
ORGANIC ACID METABOLIC PROCESS GOBP GO:0006082	165	0.173655	0.951385	0.581897	0.722439
REGULATION OF VIRAL PROCESS GOBP GO:0050792	27	0.258274	0.950093	0.525988	0.724627
PROTEIN-CONTAINING COMPLEX DISASSEMBLY GOBP GO:0032984	34	0.235401	0.948259	0.522727	0.728054
POSITIVE REGULATION OF CELL MIGRATION GOBP GO:0030335	49	0.218315	0.947642	0.530398	0.72851
POSITIVE REGULATION OF CYSTEINE-TYPE ENDOPEPTIDASE ACTIVITY INVOLVED IN APOPTOTIC PROCESS GOBP GO:0043280	18	0.277111	0.945682	0.531568	0.732357
CELLULAR CATION HOMEOSTASIS GOBP GO:0030003	43	0.223663	0.945565	0.518908	0.731664
POSITIVE REGULATION OF PROTEIN COMPLEX ASSEMBLY GOBP GO:0031334	44	0.216043	0.943156	0.566524	0.736634
EGF/EGFR SIGNALING PATHWAY WIKIPATHWAYS_20191210 WP437 HOMO SAPIENS	25	0.258415	0.942281	0.539301	0.737701
SIG_REGULATION_OF_THE_ACTIN_CYTOSKELETON_BY_RHO_GTPASES MSIGDB_C2 SIG_REGULATION_OF_THE_ACTIN_CYTOSKELETON_BY_RHO_GTPASES	20	0.280528	0.938784	0.521042	0.745346
ORGANONITROGEN COMPOUND CATABOLIC PROCESS GOBP GO:1901565	143	0.175128	0.938344	0.619816	0.74534
CELLULAR ION HOMEOSTASIS GOBP GO:0006873	43	0.223663	0.93784	0.521459	0.745558
OXOACID METABOLIC PROCESS GOBP GO:0043436	164	0.168413	0.936823	0.630588	0.747109
NEGATIVE REGULATION OF CELLULAR BIOSYNTHETIC PROCESS GOBP GO:0031327	83	0.188987	0.934577	0.556025	0.75145
SUMOYLATION OF DNA REPLICATION PROTEINS REACTOME R-HSA-4615885.3	21	0.269946	0.93332	0.537815	0.75333
GM-CSF IOB GM-CSF	18	0.279311	0.932053	0.529032	0.755256
RAS PROTEIN SIGNAL TRANSDUCTION GOBP GO:0007265	30	0.244786	0.931528	0.550218	0.755452
L13A-MEDIATED TRANSLATIONAL SILENCING OF CERULOPLASMIN EXPRESSION REACTOME DATABASE ID RELEASE 71 156827	42	0.219341	0.929512	0.572354	0.759355
ORGANELLE ASSEMBLY GOBP GO:0070925	75	0.19116	0.929438	0.573876	0.758517
NCRNA METABOLIC PROCESS GOBP GO:0034660	36	0.22902	0.9294	0.580578	0.757614
CELL-CELL SIGNALING GOBP GO:0007267	73	0.197248	0.92938	0.603604	0.756667
TRANSLATIONAL INITIATION GOBP GO:0006413	44	0.219649	0.92692	0.579957	0.761605
POSITIVE REGULATION OF CELL DEATH GOBP GO:0010942	60	0.202691	0.92686	0.610503	0.760759
NUCLEAR-TRANSCRIBED MRNA CATABOLIC PROCESS, NONSENSE-MEDIATED DECAY GOBP GO:0000184	42	0.219341	0.926508	0.580713	0.760609
GENE EXPRESSION (TRANSCRIPTION) REACTOME DATABASE ID RELEASE 71 74160	129	0.173909	0.926089	0.64877	0.760605
POSITIVE REGULATION OF CYSTEINE-TYPE ENDOPEPTIDASE ACTIVITY GOBP GO:2001056	18	0.277111	0.924878	0.543825	0.762528
AMINO ACID METABOLISM WIKIPATHWAYS_20191210 WP3925 HOMO SAPIENS	44	0.216558	0.921057	0.556989	0.770534
NEGATIVE REGULATION OF BIOSYNTHETIC PROCESS GOBP GO:0009890	87	0.185828	0.921003	0.618056	0.769675
M PHASE REACTOME R-HSA-68886.3	68	0.199387	0.920068	0.607724	0.770902
CELL SURFACE RECEPTOR SIGNALING PATHWAY INVOLVED IN CELL-CELL SIGNALING GOBP GO:1905114	47	0.213465	0.918877	0.578838	0.772627
REGULATION OF PROTEIN COMPLEX DISASSEMBLY GOBP GO:0043244	18	0.275842	0.918503	0.59408	0.772491
HALLMARK_PI3K_AKT_MTOR_SIGNALING MSIGDB_C2 HALLMARK_PI3K_AKT_MTOR_SIGNALING	22	0.262754	0.918149	0.587607	0.772323
NEGATIVE REGULATION OF MACROMOLECULE BIOSYNTHETIC PROCESS GOBP GO:0010558	79	0.189166	0.918098	0.62069	0.77145
NONSENSE-MEDIATED DECAY (NMD) REACTOME R-HSA-927802.2	41	0.219188	0.916964	0.612903	0.773034
REGULATION OF ENDOTHELIAL CELL MIGRATION GOBP GO:0010594	17	0.283707	0.916266	0.573171	0.773649
ESTABLISHMENT OF PROTEIN LOCALIZATION TO MITOCHONDRION GOBP GO:0072655	15	0.296525	0.916205	0.545643	0.772809
POSITIVE REGULATION OF PROTEIN SECRETION GOBP GO:0050714	17	0.276894	0.916116	0.591093	0.771996
CELLULAR PROTEIN MODIFICATION PROCESS GOBP GO:0006464	242	0.158095	0.915367	0.673961	0.772799
NONSENSE MEDIATED DECAY (NMD) ENHANCED BY THE EXON JUNCTION COMPLEX (EJC) REACTOME R-HSA-975957.1	41	0.219188	0.915351	0.584388	0.771845
REGULATION OF NEUROTRANSMITTER LEVELS GOBP GO:0001505	20	0.266532	0.914431	0.563126	0.772944
PROTEIN MODIFICATION PROCESS GOBP GO:0036211	242	0.158095	0.912864	0.717391	0.775686
DIRECT P53 EFFECTORS PATHWAY INTERACTION DATABASE NCI-NATURE CURATED DATA DIRECT P53 EFFECTORS	18	0.269917	0.912266	0.591002	0.776067
POSITIVE REGULATION OF CELL CYCLE PROCESS GOBP GO:0090068	24	0.252934	0.912238	0.616842	0.775142
CELLULAR MACROMOLECULE BIOSYNTHETIC PROCESS GOBP GO:0034645	130	0.169086	0.91174	0.675439	0.775239
CIRCADIAN RHYTHM RELATED GENES WIKIPATHWAYS_20191210 WP3594 HOMO SAPIENS	16	0.288407	0.91028	0.567729	0.777644
REGULATION OF LOCALIZATION GOBP GO:0032879	227	0.157157	0.908401	0.71954	0.78105
IMMUNE RESPONSE-REGULATING CELL SURFACE RECEPTOR SIGNALING PATHWAY GOBP GO:0002768	47	0.210078	0.906108	0.617108	0.785492
POSITIVE REGULATION OF APOPTOTIC PROCESS GOBP GO:0043065	54	0.202159	0.905894	0.610245	0.785007
NEGATIVE REGULATION OF CELLULAR PROTEIN LOCALIZATION GOBP GO:1903828	16	0.274754	0.904629	0.600798	0.786873
REGULATION OF PLK1 ACTIVITY AT G2 M TRANSITION REACTOME R-HSA-2565942.1	17	0.280426	0.904544	0.586639	0.786045
VEGFA-VEGFR2 SIGNALING WIKIPATHWAYS_20191210 WP3888 HOMO SAPIENS	121	0.171792	0.903659	0.689732	0.787056
MACROMOLECULE MODIFICATION GOBP GO:0043412	250	0.153692	0.902694	0.761682	0.788286
SELENOAMINO ACID METABOLISM REACTOME DATABASE ID RELEASE 71 2408522	37	0.218575	0.902308	0.625259	0.788137
DISEASES OF METABOLISM REACTOME R-HSA-5668914.1	16	0.28412	0.901207	0.584016	0.789759
CYTOPLASMIC TRANSLATION GOBP GO:0002181	17	0.280603	0.900959	0.581741	0.789301
SMALL GTPASE MEDIATED SIGNAL TRANSDUCTION GOBP GO:0007264	31	0.231212	0.900777	0.597872	0.788721
REGULATION OF PHOSPHORYLATION GOBP GO:0042325	115	0.171801	0.899493	0.676026	0.790731
POSITIVE REGULATION OF PEPTIDE SECRETION GOBP GO:0002793	17	0.276894	0.897958	0.589691	0.793296
TSH NETPATH TSH	17	0.273065	0.896653	0.589796	0.79522
POSITIVE REGULATION OF PROGRAMMED CELL DEATH GOBP GO:0043068	54	0.202159	0.896557	0.618834	0.794404
NEGATIVE REGULATION OF TRANSFERASE ACTIVITY GOBP GO:0051348	28	0.238047	0.896167	0.61875	0.794312
REGULATION OF RNA STABILITY GOBP GO:0043487	50	0.203385	0.895872	0.660044	0.793966
REGULATION OF CELLULAR COMPONENT BIOGENESIS GOBP GO:0044087	117	0.173737	0.894422	0.69265	0.796268
ALPHA6BETA4INTEGRIN NETPATH ALPHA6BETA4INTEGRIN	16	0.28021	0.894047	0.589041	0.796119
POSITIVE REGULATION OF CHROMOSOME ORGANIZATION GOBP GO:2001252	20	0.269398	0.892158	0.59436	0.79939
HALLMARK_MYC_TARGETS_V1 MSIGDB_C2 HALLMARK_MYC_TARGETS_V1	90	0.180183	0.889939	0.691111	0.803387
PCP CE PATHWAY REACTOME DATABASE ID RELEASE 71 4086400	32	0.223978	0.888843	0.612576	0.804778
NONSENSE MEDIATED DECAY (NMD) INDEPENDENT OF THE EXON JUNCTION COMPLEX (EJC) REACTOME R-HSA-975956.1	36	0.218423	0.886506	0.631799	0.809016
POSITIVE REGULATION OF CELL CYCLE GOBP GO:0045787	32	0.226505	0.882605	0.645022	0.816849
CELLULAR RESPONSE TO UNFOLDED PROTEIN GOBP GO:0034620	26	0.239939	0.88236	0.627723	0.816376
IMMUNE SYSTEM DEVELOPMENT GOBP GO:0002520	26	0.238519	0.880834	0.657388	0.818657
EUKARYOTIC TRANSLATION TERMINATION REACTOME R-HSA-72764.4	35	0.218271	0.880219	0.652977	0.818987
REGULATION OF CYTOSKELETON ORGANIZATION GOBP GO:0051493	83	0.181929	0.879385	0.718681	0.819817
RESPONSE TO LIPID GOBP GO:0033993	39	0.215753	0.878975	0.641631	0.819782
REGULATION OF CELL CYCLE PROCESS GOBP GO:0010564	81	0.179301	0.877935	0.685535	0.821048
REGULATION OF MRNA STABILITY GOBP GO:0043488	50	0.203385	0.876171	0.693416	0.823939
REGULATION OF SYMBIOSIS, ENCOMPASSING MUTUALISM THROUGH PARASITISM GOBP GO:0043903	30	0.227587	0.873511	0.65121	0.828655
CELLULAR RESPONSE TO OXYGEN LEVELS GOBP GO:0071453	38	0.216445	0.872045	0.660569	0.830695
REGULATION OF GTPASE ACTIVITY GOBP GO:0043087	15	0.278437	0.871797	0.633603	0.830244
EUKARYOTIC TRANSLATION ELONGATION REACTOME R-HSA-156842.2	37	0.218575	0.871018	0.65102	0.830828
RESPONSE TO TEMPERATURE STIMULUS GOBP GO:0009266	15	0.272522	0.870668	0.658683	0.830523
REGULATION OF NERVOUS SYSTEM DEVELOPMENT GOBP GO:0051960	43	0.202335	0.870273	0.700413	0.830405
MACROMOLECULE BIOSYNTHETIC PROCESS GOBP GO:0009059	132	0.165003	0.866803	0.759062	0.836735
RESPONSE TO DRUG GOBP GO:0042493	36	0.216222	0.864725	0.689938	0.840134
ANTIGEN PROCESSING-CROSS PRESENTATION REACTOME R-HSA-1236975.1	29	0.226377	0.864228	0.6893	0.840099
REGULATION OF SUPRAMOLECULAR FIBER ORGANIZATION GOBP GO:1902903	61	0.184861	0.863881	0.727862	0.839773
EGFR1 NETPATH EGFR1	109	0.168137	0.863798	0.744344	0.838914
REGULATION OF NEUROGENESIS GOBP GO:0050767	40	0.210569	0.86045	0.690428	0.844839
REGULATION OF APOPTOTIC SIGNALING PATHWAY GOBP GO:2001233	49	0.197552	0.859776	0.706004	0.845183
REGULATION OF DEVELOPMENTAL PROCESS GOBP GO:0050793	187	0.152611	0.858469	0.82093	0.846831
ANTIGEN PROCESSING AND PRESENTATION OF EXOGENOUS PEPTIDE ANTIGEN VIA MHC CLASS I, TAP-DEPENDENT GOBP GO:0002479	25	0.235663	0.857593	0.658747	0.847565
CELLULAR AMINO ACID METABOLIC PROCESS GOBP GO:0006520	51	0.195811	0.857502	0.739224	0.846714
IMMUNE RESPONSE-ACTIVATING CELL SURFACE RECEPTOR SIGNALING PATHWAY GOBP GO:0002429	44	0.200844	0.85377	0.7	0.853314
REGULATION OF ATP METABOLIC PROCESS GOBP GO:1903578	31	0.215257	0.853017	0.713402	0.853825
REGULATION OF GENE EXPRESSION GOBP GO:0010468	325	0.141407	0.852475	0.869136	0.853885
CELLULAR MACROMOLECULE METABOLIC PROCESS GOBP GO:0044260	429	0.138357	0.852432	0.91455	0.852961
CELL-CELL SIGNALING BY WNT GOBP GO:0198738	46	0.195989	0.851023	0.737991	0.854875
NERVOUS SYSTEM DEVELOPMENT GOBP GO:0007399	124	0.161779	0.846282	0.823395	0.863459
WNT SIGNALING PATHWAY GOBP GO:0016055	46	0.195989	0.843101	0.737288	0.868752
CELLULAR PROTEIN COMPLEX DISASSEMBLY GOBP GO:0043624	20	0.244764	0.842211	0.665948	0.869519
PID_P53_DOWNSTREAM_PATHWAY MSIGDB_C2 PID_P53_DOWNSTREAM_PATHWAY	17	0.262176	0.840901	0.661157	0.871007
REGULATION OF CELLULAR LOCALIZATION GOBP GO:0060341	94	0.166332	0.839393	0.792237	0.872832
POSITIVE REGULATION OF CATABOLIC PROCESS GOBP GO:0009896	40	0.202927	0.838981	0.719409	0.872625
HEMATOPOIETIC OR LYMPHOID ORGAN DEVELOPMENT GOBP GO:0048534	24	0.23163	0.838003	0.714286	0.873505
PARKIN-UBIQUITIN PROTEASOMAL SYSTEM PATHWAY WIKIPATHWAYS_20191210 WP2359 HOMO SAPIENS	25	0.223968	0.837837	0.689805	0.872761
PID_ERBB1_DOWNSTREAM_PATHWAY MSIGDB_C2 PID_ERBB1_DOWNSTREAM_PATHWAY	23	0.233294	0.836611	0.687371	0.874112
SENESCENCE AND AUTOPHAGY IN CANCER WIKIPATHWAYS_20191210 WP615 HOMO SAPIENS	19	0.248344	0.836536	0.693277	0.873212
PROTEIN LOCALIZATION TO MITOCHONDRION GOBP GO:0070585	16	0.263553	0.833695	0.696202	0.877498
POSTTRANSCRIPTIONAL REGULATION OF GENE EXPRESSION GOBP GO:0010608	93	0.165855	0.831121	0.830803	0.881309
MULTI-ORGANISM PROCESS GOBP GO:0051704	157	0.151864	0.828522	0.873853	0.885119
HIV INFECTION REACTOME DATABASE ID RELEASE 71 162906	65	0.179555	0.827284	0.785263	0.886314
RIBONUCLEOPROTEIN COMPLEX BIOGENESIS GOBP GO:0022613	52	0.188426	0.826655	0.79386	0.88643
REGULATION OF PROTEIN MODIFICATION BY SMALL PROTEIN CONJUGATION OR REMOVAL GOBP GO:1903320	30	0.210861	0.82441	0.740206	0.88954
CELLULAR MODIFIED AMINO ACID METABOLIC PROCESS GOBP GO:0006575	33	0.211967	0.823994	0.755319	0.889253
PROTEIN CATABOLIC PROCESS GOBP GO:0030163	85	0.167956	0.822759	0.788018	0.890453
ADAPTIVE IMMUNE SYSTEM REACTOME DATABASE ID RELEASE 71 1280218	84	0.168205	0.82154	0.837838	0.891639
CELLULAR RESPONSE TO TOPOLOGICALLY INCORRECT PROTEIN GOBP GO:0035967	28	0.213515	0.818678	0.761807	0.895974
CELLULAR PROTEIN CATABOLIC PROCESS GOBP GO:0044257	78	0.169736	0.818658	0.821192	0.894965
ERBB1 DOWNSTREAM SIGNALING PATHWAY INTERACTION DATABASE NCI-NATURE CURATED DATA ERBB1 DOWNSTREAM SIGNALING	24	0.222881	0.817315	0.756646	0.896224
REACTIVE OXYGEN SPECIES METABOLIC PROCESS GOBP GO:0072593	17	0.25134	0.817291	0.702643	0.89523
REGULATION OF MRNA CATABOLIC PROCESS GOBP GO:0061013	52	0.186616	0.816739	0.800774	0.89515
REGULATION OF GENERATION OF PRECURSOR METABOLITES AND ENERGY GOBP GO:0043467	34	0.205507	0.812339	0.765823	0.901941
HALLMARK_ANDROGEN_RESPONSE MSIGDB_C2 HALLMARK_ANDROGEN_RESPONSE	18	0.245431	0.809373	0.763889	0.906082
PARKINSON DISEASE PANTHER PATHWAY P00049	21	0.234499	0.809284	0.734252	0.905183
REGULATION OF MRNA SPLICING, VIA SPLICEOSOME GOBP GO:0048024	17	0.24742	0.808457	0.725572	0.905696
GASTRIN_CCK2R_240212 PANTHER PATHWAY P06959	20	0.233786	0.807817	0.753535	0.905816
REGULATION OF PLASMA MEMBRANE BOUNDED CELL PROJECTION ORGANIZATION GOBP GO:0120035	45	0.189023	0.803832	0.802875	0.911616
POST-TRANSLATIONAL PROTEIN MODIFICATION GOBP GO:0043687	58	0.17826	0.801113	0.814894	0.915079
REGULATION OF CELL PROJECTION ORGANIZATION GOBP GO:0031344	45	0.189023	0.800877	0.794239	0.914404
ACTIVATION OF THE MRNA UPON BINDING OF THE CAP-BINDING COMPLEX AND EIFS, AND SUBSEQUENT BINDING TO 43S REACTOME R-HSA-72662.3	25	0.216759	0.797679	0.775051	0.918847
PLASMA MEMBRANE BOUNDED CELL PROJECTION ASSEMBLY GOBP GO:0120031	26	0.21506	0.797267	0.763949	0.918456
NEGATIVE REGULATION OF NUCLEOBASE-CONTAINING COMPOUND METABOLIC PROCESS GOBP GO:0045934	81	0.165022	0.796286	0.838298	0.918977
NEUROGENESIS GOBP GO:0022008	88	0.163183	0.795184	0.841163	0.919736
WNT SIGNALING PATHWAY, PLANAR CELL POLARITY PATHWAY GOBP GO:0060071	30	0.205962	0.794573	0.745182	0.919648
CELL PROJECTION ASSEMBLY GOBP GO:0030031	27	0.209431	0.792996	0.764092	0.921251
REGULATION OF CELLULAR COMPONENT ORGANIZATION GOBP GO:0051128	241	0.136854	0.791089	0.944573	0.923236
PROTEIN DEPHOSPHORYLATION GOBP GO:0006470	15	0.256096	0.790019	0.756863	0.92384
MICROTUBULE CYTOSKELETON ORGANIZATION GOBP GO:0000226	39	0.193624	0.788785	0.810127	0.924702
TRANSLATION INITIATION COMPLEX FORMATION REACTOME DATABASE ID RELEASE 71 72649	25	0.216759	0.78875	0.758836	0.923701
REGULATION OF NEURON DEATH GOBP GO:1901214	16	0.248158	0.787329	0.742739	0.924886
HALLMARK_COAGULATION MSIGDB_C2 HALLMARK_COAGULATION	28	0.211249	0.786331	0.795309	0.925325
POSITIVE REGULATION OF PROTEIN CATABOLIC PROCESS GOBP GO:0045732	28	0.210494	0.785857	0.788618	0.925092
MAINTENANCE OF LOCATION GOBP GO:0051235	27	0.209853	0.78305	0.802846	0.928404
RIBOSOMAL SCANNING AND START CODON RECOGNITION REACTOME R-HSA-72702.3	24	0.216609	0.780349	0.761807	0.931383
CHEMOKINE SIGNALING PATHWAY WIKIPATHWAYS_20191210 WP3929 HOMO SAPIENS	15	0.246155	0.777452	0.756264	0.934821
TNFALPHA NETPATH TNFALPHA	50	0.17694	0.776959	0.810458	0.934497
EGFR1 IOB EGFR1	109	0.153569	0.775495	0.907895	0.935575
CELLULAR RESPONSE TO GROWTH FACTOR STIMULUS GOBP GO:0071363	34	0.189749	0.775187	0.84127	0.935021
AMINO ACID AND DERIVATIVE METABOLISM REACTOME R-HSA-71291.6	99	0.150687	0.771563	0.905747	0.939197
MEMBRANE DOCKING GOBP GO:0022406	23	0.214647	0.771417	0.798319	0.938331
RNA METABOLIC PROCESS GOBP GO:0016070	156	0.141643	0.771189	0.938215	0.937632
REGULATION OF PLASMA MEMBRANE BOUNDED CELL PROJECTION ASSEMBLY GOBP GO:0120032	17	0.234942	0.770504	0.778481	0.937573
FC RECEPTOR SIGNALING PATHWAY GOBP GO:0038093	44	0.182674	0.768961	0.836032	0.93879
ANTIGEN PROCESSING AND PRESENTATION OF EXOGENOUS PEPTIDE ANTIGEN VIA MHC CLASS I GOBP GO:0042590	26	0.207248	0.767841	0.795745	0.939379
PID_PDGFRB_PATHWAY MSIGDB_C2 PID_PDGFRB_PATHWAY	30	0.200834	0.766269	0.8	0.940566
PLATELET DEGRANULATION GOBP GO:0002576	27	0.207673	0.765878	0.819672	0.940069
PDGFR-BETA SIGNALING PATHWAY PATHWAY INTERACTION DATABASE NCI-NATURE CURATED DATA PDGFR-BETA SIGNALING PATHWAY	30	0.200834	0.764117	0.823409	0.941534
REGULATION OF CELL PROJECTION ASSEMBLY GOBP GO:0060491	17	0.234942	0.761514	0.764471	0.944038
TRANS-SYNAPTIC SIGNALING GOBP GO:0099537	16	0.234501	0.761431	0.785425	0.94311
ANTEROGRADE TRANS-SYNAPTIC SIGNALING GOBP GO:0098916	16	0.234501	0.760069	0.806517	0.943961
GENERATION OF NEURONS GOBP GO:0048699	86	0.156477	0.75815	0.898268	0.945581
REGULATION OF ESTABLISHMENT OF PLANAR POLARITY GOBP GO:0090175	31	0.195563	0.756112	0.853763	0.94738
REGULATION OF CELLULAR PROTEIN LOCALIZATION GOBP GO:1903827	73	0.15911	0.754951	0.920993	0.947933
SYNAPTIC SIGNALING GOBP GO:0099536	17	0.232787	0.754746	0.809935	0.947172
CELLULAR RESPONSE TO HEAT STRESS REACTOME R-HSA-3371556.1	39	0.182678	0.753458	0.865731	0.94787
TSLP NETPATH TSLP	30	0.196229	0.753172	0.832589	0.947223
REGULATION OF CHROMOSOME ORGANIZATION GOBP GO:0033044	24	0.206388	0.752422	0.830867	0.947176
NUCLEOSIDE METABOLIC PROCESS GOBP GO:0009116	15	0.235257	0.752197	0.816444	0.946418
NEURON DIFFERENTIATION GOBP GO:0030182	57	0.16467	0.751346	0.876984	0.946548
NEGATIVE REGULATION OF TRANSCRIPTION BY RNA POLYMERASE II GOBP GO:0000122	31	0.191592	0.748907	0.837675	0.948647
POSITIVE REGULATION OF PROTEIN POLYMERIZATION GOBP GO:0032273	23	0.208852	0.746236	0.843254	0.951004
ANATOMICAL STRUCTURE HOMEOSTASIS GOBP GO:0060249	26	0.203553	0.745137	0.840671	0.951385
REGULATION OF PROTEIN DEPOLYMERIZATION GOBP GO:1901879	15	0.238452	0.742971	0.824561	0.95302
NEGATIVE REGULATION OF CATABOLIC PROCESS GOBP GO:0009895	34	0.185423	0.7426	0.86031	0.952486
NEGATIVE REGULATION OF MITOTIC CELL CYCLE GOBP GO:0045930	40	0.180067	0.741081	0.871579	0.953298
FORMATION OF THE TERNARY COMPLEX, AND SUBSEQUENTLY, THE 43S COMPLEX REACTOME DATABASE ID RELEASE 71 72695	21	0.21616	0.740427	0.802372	0.953075
CHEMICAL SYNAPTIC TRANSMISSION GOBP GO:0007268	16	0.234501	0.73853	0.826004	0.954352
ALPHA-AMINO ACID METABOLIC PROCESS GOBP GO:1901605	40	0.176534	0.736386	0.887097	0.955843
REGULATION OF MULTI-ORGANISM PROCESS GOBP GO:0043900	37	0.178737	0.735783	0.876858	0.955514
POST-TRANSLATIONAL PROTEIN MODIFICATION REACTOME DATABASE ID RELEASE 71 597592	187	0.130619	0.735517	0.985043	0.954773
RESPONSE TO GROWTH FACTOR GOBP GO:0070848	35	0.182641	0.729095	0.865306	0.961189
HEMOPOIESIS GOBP GO:0030097	23	0.201327	0.725495	0.848739	0.96417
NEURON PROJECTION DEVELOPMENT GOBP GO:0031175	51	0.163761	0.724773	0.909474	0.963927
REGULATION OF CELLULAR RESPONSE TO HEAT GOBP GO:1900034	33	0.18238	0.723595	0.886364	0.964224
REGULATION OF CELLULAR AMIDE METABOLIC PROCESS GOBP GO:0034248	59	0.156522	0.721284	0.929336	0.965649
GLYCOSYL COMPOUND METABOLIC PROCESS GOBP GO:1901657	19	0.210405	0.719498	0.840671	0.966517
CILIUM ASSEMBLY GOBP GO:0060271	20	0.20842	0.714919	0.875764	0.970298
REGULATION OF ERK1 AND ERK2 CASCADE GOBP GO:0070372	16	0.221393	0.712819	0.863539	0.971325
CILIUM ORGANIZATION GOBP GO:0044782	20	0.20842	0.710532	0.860707	0.972628
REGULATION OF MRNA METABOLIC PROCESS GOBP GO:1903311	69	0.153429	0.710317	0.954936	0.971815
POSITIVE REGULATION OF ANGIOGENESIS GOBP GO:0045766	17	0.213818	0.710036	0.863179	0.971037
REGULATION OF VESICLE-MEDIATED TRANSPORT GOBP GO:0060627	47	0.163837	0.708997	0.92766	0.970957
POSITIVE REGULATION OF VASCULATURE DEVELOPMENT GOBP GO:1904018	18	0.210279	0.708819	0.869198	0.970076
PEPTIDE METABOLIC PROCESS GOBP GO:0006518	94	0.143557	0.70866	0.968153	0.969178
PLATELET ACTIVATION, SIGNALING AND AGGREGATION REACTOME DATABASE ID RELEASE 71 76002	44	0.167017	0.708104	0.92827	0.9687
REGULATION OF PROTEIN UBIQUITINATION GOBP GO:0031396	26	0.192574	0.707317	0.888	0.968438
HIV LIFE CYCLE REACTOME R-HSA-162587.2	34	0.180138	0.704807	0.894094	0.969769
CELLULAR MACROMOLECULE CATABOLIC PROCESS GOBP GO:0044265	139	0.130344	0.702263	0.992857	0.971107
RIBOSOME BIOGENESIS GOBP GO:0042254	27	0.185159	0.70041	0.912245	0.971778
NEGATIVE REGULATION OF CELL DEVELOPMENT GOBP GO:0010721	19	0.210891	0.698308	0.868476	0.972797
RESPONSE TO EXTRACELLULAR STIMULUS GOBP GO:0009991	17	0.212537	0.697438	0.855984	0.97254
RRNA PROCESSING GOBP GO:0006364	18	0.204841	0.697384	0.872117	0.971543
NEGATIVE REGULATION OF APOPTOTIC SIGNALING PATHWAY GOBP GO:2001234	26	0.186095	0.694914	0.897436	0.972807
POSITIVE REGULATION OF ACTIN FILAMENT POLYMERIZATION GOBP GO:0030838	18	0.208132	0.694388	0.882845	0.972247
RRNA METABOLIC PROCESS GOBP GO:0016072	18	0.204841	0.693344	0.868313	0.972139
PROTEIN SUMOYLATION GOBP GO:0016925	21	0.200413	0.691909	0.900208	0.972412
MACROMOLECULE CATABOLIC PROCESS GOBP GO:0009057	159	0.126034	0.689976	0.993562	0.973072
NCRNA PROCESSING GOBP GO:0034470	24	0.184775	0.678489	0.924528	0.98144
LATE PHASE OF HIV LIFE CYCLE REACTOME DATABASE ID RELEASE 71 162599	31	0.173329	0.677926	0.929314	0.980863
REGULATION OF PROTEIN STABILITY GOBP GO:0031647	53	0.154864	0.67774	0.968153	0.979977
POSITIVE REGULATION OF CELLULAR AMIDE METABOLIC PROCESS GOBP GO:0034250	22	0.190739	0.674119	0.895706	0.981751
NEGATIVE REGULATION OF CELL DIFFERENTIATION GOBP GO:0045596	37	0.166445	0.671239	0.925553	0.982823
REGULATION OF TRANSMEMBRANE RECEPTOR PROTEIN SERINE/THREONINE KINASE SIGNALING PATHWAY GOBP GO:0090092	18	0.198411	0.67024	0.899177	0.98253
NEGATIVE REGULATION OF CELLULAR CATABOLIC PROCESS GOBP GO:0031330	32	0.171621	0.668733	0.921739	0.982624
DISEASE REACTOME R-HSA-1643685.11	182	0.119039	0.666876	0.995536	0.982923
POSITIVE REGULATION OF CELLULAR COMPONENT ORGANIZATION GOBP GO:0051130	140	0.123467	0.665972	0.990762	0.982542
REGULATION OF RNA SPLICING GOBP GO:0043484	20	0.193588	0.665388	0.889597	0.981922
TGF_BETA_RECEPTOR NETPATH TGF_BETA_RECEPTOR	34	0.165007	0.663594	0.927083	0.982128
REGULATION OF MICROTUBULE CYTOSKELETON ORGANIZATION GOBP GO:0070507	21	0.18915	0.662547	0.929577	0.981813
IRE1-MEDIATED UNFOLDED PROTEIN RESPONSE GOBP GO:0036498	16	0.206111	0.662243	0.914807	0.980998
REGULATION OF MORPHOGENESIS OF AN EPITHELIUM GOBP GO:1905330	33	0.169036	0.660175	0.930435	0.981444
XBP1(S) ACTIVATES CHAPERONE GENES REACTOME DATABASE ID RELEASE 71 381038	15	0.209243	0.658776	0.914046	0.98141
ANDROGEN RECEPTOR SIGNALING PATHWAY WIKIPATHWAYS_20191210 WP138 HOMO SAPIENS	16	0.204985	0.653329	0.922465	0.983911
REGULATION OF HSF1-MEDIATED HEAT SHOCK RESPONSE REACTOME R-HSA-3371453.1	32	0.168992	0.648593	0.938947	0.985764
IRE1ALPHA ACTIVATES CHAPERONES REACTOME R-HSA-381070.1	16	0.206111	0.64782	0.903093	0.985171
MICROTUBULE-BASED PROCESS GOBP GO:0007017	52	0.145194	0.64632	0.95966	0.985059
POSITIVE REGULATION OF TRANSLATION GOBP GO:0045727	19	0.190345	0.644582	0.89749	0.985059
MITOTIC PROMETAPHASE REACTOME R-HSA-68877.5	25	0.174867	0.641867	0.954451	0.985647
PID_FAK_PATHWAY MSIGDB_C2 PID_FAK_PATHWAY	16	0.198211	0.639967	0.906445	0.985739
NEGATIVE REGULATION OF PROTEIN KINASE ACTIVITY GOBP GO:0006469	19	0.189494	0.638555	0.922027	0.985561
MAINTENANCE OF PROTEIN LOCATION GOBP GO:0045185	21	0.182373	0.638066	0.948387	0.984811
TGF_BETA_RECEPTOR IOB TGF_BETA_RECEPTOR	28	0.170843	0.634061	0.949672	0.986018
TRANSPORT ALONG MICROTUBULE GOBP GO:0010970	15	0.19551	0.63119	0.940499	0.986601
HEART DEVELOPMENT GOBP GO:0007507	19	0.187541	0.6283	0.931313	0.987123
SIGNALING EVENTS MEDIATED BY FOCAL ADHESION KINASE PATHWAY INTERACTION DATABASE NCI-NATURE CURATED DATA SIGNALING EVENTS MEDIATED BY FOCAL ADHESION KINASE	15	0.198074	0.627587	0.905512	0.986495
PLASMA MEMBRANE BOUNDED CELL PROJECTION ORGANIZATION GOBP GO:0120036	77	0.13094	0.626839	0.991091	0.985886
CELL PROJECTION ORGANIZATION GOBP GO:0030030	77	0.13094	0.61906	0.991684	0.98851
SIGNALING EVENTS MEDIATED BY HEPATOCYTE GROWTH FACTOR RECEPTOR (C-MET) PATHWAY INTERACTION DATABASE NCI-NATURE CURATED DATA SIGNALING EVENTS MEDIATED BY HEPATOCYTE GROWTH FACTOR RECEPTOR (C-MET)	16	0.189967	0.617513	0.949083	0.98826
REGULATION OF ACTIN CYTOSKELETON WIKIPATHWAYS_20191210 WP51 HOMO SAPIENS	28	0.161845	0.61305	0.966387	0.989229
PID_MET_PATHWAY MSIGDB_C2 PID_MET_PATHWAY	16	0.189967	0.611034	0.939394	0.98911
ORGANELLE LOCALIZATION BY MEMBRANE TETHERING GOBP GO:0140056	19	0.185294	0.60853	0.949393	0.989141
ANTIGEN PROCESSING AND PRESENTATION OF PEPTIDE ANTIGEN VIA MHC CLASS I GOBP GO:0002474	29	0.159392	0.607724	0.97397	0.988494
NUCLEUS ORGANIZATION GOBP GO:0006997	22	0.174341	0.607421	0.960159	0.987609
POSITIVE REGULATION OF CELLULAR COMPONENT BIOGENESIS GOBP GO:0044089	64	0.131892	0.594805	0.997783	0.991615
MICROTUBULE-BASED TRANSPORT GOBP GO:0099111	15	0.19551	0.590023	0.968017	0.992367
HSP90 CHAPERONE CYCLE FOR SHRS REACTOME R-HSA-3371497.2	17	0.178522	0.583177	0.963124	0.993652
NEGATIVE REGULATION OF MULTI-ORGANISM PROCESS GOBP GO:0043901	16	0.178018	0.574976	0.97286	0.995147
REGULATION OF TRANSLATION GOBP GO:0006417	49	0.132819	0.574588	0.993007	0.994223
MICROTUBULE-BASED MOVEMENT GOBP GO:0007018	19	0.16866	0.562941	0.974659	0.99635
CYTOSKELETON-DEPENDENT INTRACELLULAR TRANSPORT GOBP GO:0030705	21	0.158875	0.561281	0.969365	0.995766
DEVELOPMENTAL GROWTH GOBP GO:0048589	18	0.164493	0.545563	0.984158	0.998385
GROWTH GOBP GO:0040007	18	0.164493	0.54457	0.983228	0.997595
REGULATION OF MICROTUBULE-BASED PROCESS GOBP GO:0032886	23	0.143126	0.507329	0.988119	1
GENE EXPRESSION GOBP GO:0010467	209	0.0865293	0.489106	1	1
TNFALPHA IOB TNFALPHA	42	0.114423	0.4769	1	1
INFECTIOUS DISEASE REACTOME DATABASE ID RELEASE 71 5663205	125	0.087814	0.463419	1	1
METABOLISM OF RNA REACTOME R-HSA-8953854.4	140	0.0762682	0.404446	1	1
TGF-BETA SIGNALING PATHWAY WIKIPATHWAYS_20191210 WP366 HOMO SAPIENS	24	0.109751	0.399712	1	1
HOST INTERACTIONS OF HIV FACTORS REACTOME R-HSA-162909.1	55	0.0857606	0.388994	1	1
RNA SPLICING GOBP GO:0008380	60	0.0830386	0.381845	1	1
RNA PROCESSING GOBP GO:0006396	91	0.0742879	0.365354	1	0.999938
