# Supplementary material for: Multi-omic analysis of bat versus human fibroblasts reveals altered central metabolism
Source: eLife. 2024 Jul 22;13:e94007. doi: 10.7554/eLife.94007 (PMC11262796; doi:10.7554/eLife.94007)
Supplement: Supplementary file 9. — Flux sampling was performed with 5000 flux vectors for the PaLung and WI-38 metabolic models each. The flux histograms for each reaction were compared across the two models and the following statistics were extracted from the histograms. [file elife-94007-supp9.xlsx]

## Sheet: Index
Title	Multi-omic analysis of bat versus human fibroblasts reveals altered central metabolism
Authors	N. Suhas Jagannathan, Javier Yu Peng Koh, Younghwan Lee, Radoslaw M Sobota, Aaron Irving, Lin-Fa Wang, Yoko Itahana, Koji Itahana, Lisa Tucker-Kellogg
Supplementary Table No.	Supplementary Table 9
Supplementary Table Title	Flux sampling results comparing flux distributions in the constrained PaLung and WI-38 models
Description	Flux sampling was performed with 5000 flux vectors for the PaLung and WI-38 metabolic models each. The flux histograms for each reaction were compared across the two models and the following statistics were extracted from the histograms.
Column header	Contents
Reaction Name	Name of the reaction in the metabolic models
Rxn Formula	Reaction equation as defined in the metabolic models
PaLung model - Mean Flux	Mean of the flux distribution for the corresponding reaction in the PaLung model
PaLung model - Stdev	Standard deviation of the flux distribution for the corresponding reaction in the PaLung model
PaLung model - Median Flux	Median of the flux distribution for the corresponding reaction in the PaLung model
PaLung model - MAD	Median Absolute Deviation of the flux distribution for the corresponding reaction in the PaLung model
WI38 model - Mean Flux	Mean of the flux distribution for the corresponding reaction in the WI-38 model
WI38 model - Stdev	Standard deviation of the flux distribution for the corresponding reaction in the WI-38 model
WI38 model - Median Flux	Median of the flux distribution for the corresponding reaction in the WI-38 model
WI38 model - MAD	Median Absolute Deviation of the flux distribution for the corresponding reaction in the WI-38 model
EffectSize	Absolute value of effect size computed as (PaLungMean - WI38Mean)/((PaLungStdev+WI38Stdev)/2)
FDR	p-values obtained using a Wilcoxon ranksum test on the flux values of PaLung and WI-38 models for the corresponding reaction, and corrected for FDR using Benjamini-Hochberg method

## Sheet: Sheet1
		PaLung model				WI38 model
Reaction Name	Rxn Formula	Mean Flux	Stdev	Median Flux	MAD	Mean Flux	Stdev	Median Flux	MAD	EffectSize	FDR
CI_MitoCore	h[m] + 3.996 PMF[m] + nadh[m] + 0.002 o2[m] + 0.999 q10[m] <=> 3.996 PMF[c] + nad[m] + 0.002 o2s[m] + 0.999 q10h2[m]	29.2236	0.199649	29.1625	0.112139	7.09519	3.39018	7.46436	2.7694	12.3284	0
SPODMm	2 h[m] + 2 o2s[m] <=> h2o2[m] + o2[m]	0.0292236	0.000199649	0.0291625	0.000112139	0.00709519	0.00339018	0.00746436	0.0027694	12.3284	0
CIII_MitoCore	2 ficytC[m] + 2 PMF[m] + q10h2[m] <=> 2 focytC[m] + 4 PMF[c] + q10[m]	30.6382	0.164629	30.6876	0.0842864	37.6601	1.55902	38.0722	0.908568	8.14772	0
CIV_MitoCore	4 focytC[m] + 8 PMF[m] + o2[m] <=> 4 ficytC[m] + 4 PMF[c] + 2 h2o[m]	15.3191	0.0823144	15.3438	0.0421432	18.8301	0.779511	19.0361	0.454284	8.14772	0
O2tm	o2[c] <=> o2[m]	15.3614	0.0814303	15.3867	0.0415457	18.857	0.779258	19.0638	0.452758	8.12283	0
O2t	<=> o2[c]	15.4364	0.0859864	15.4536	0.0462866	18.9174	0.778531	19.1235	0.456126	8.05296	0
r2534	<=> thr_L[c]	0.000290017	0.000267776	0.00020735	0.0001426	0.00740297	0.00316012	0.00785334	0.00247676	4.15004	0
AKGDm	akg[m] + coa[m] + nad[m] <=> co2[m] + nadh[m] + succoa[m]	0.139628	0.12121	0.106439	0.0692359	2.67389	1.53715	2.542	1.20567	3.05636	0
CII_MitoCore	q10[m] + succ[m] <=> fum[m] + q10h2[m]	-0.0786028	0.180242	-0.0764487	0.107282	2.45803	1.53776	2.35256	1.20337	2.953	0
r1446	btcoa[m] + q10[m] <=> b2coa[m] + q10h2[m]	0.0273143	0.021187	0.0230325	0.0135162	0.341041	0.191407	0.329309	0.15071	2.95142	0
ECOAH1m	3hbcoa[m] <=> b2coa[m] + h2o[m]	-0.0512185	0.0216473	-0.0470051	0.0134465	-0.365466	0.191323	-0.354094	0.150254	2.95109	0
HACD1m	aacoa[m] + h[m] + nadh[m] <=> 3hbcoa[m] + nad[m]	-0.0512185	0.0216473	-0.0470051	0.0134465	-0.365466	0.191323	-0.354094	0.150254	2.95109	0
r0733	HC01407[m] + nad[m] <=> h[m] + HC01408[m] + nadh[m]	0.0242858	0.0212683	0.0202434	0.0136216	0.338095	0.191407	0.326928	0.1506	2.95107	0
r0734	h2o[m] + HC01410[m] <=> HC01407[m]	0.0242858	0.0212683	0.0202434	0.0136216	0.338095	0.191407	0.326928	0.1506	2.95107	0
r0728	HC01403[m] <=> dc2coa[m] + h2o[m]	-0.0242858	0.0212683	-0.0202434	0.0136216	-0.338095	0.191407	-0.326928	0.1506	2.95107	0
r0732	coa[m] + HC01406[m] <=> accoa[m] + HC01409[m]	0.0242858	0.0212683	0.0202434	0.0136216	0.338095	0.191407	0.326928	0.1506	2.95107	0
MTPC16_MitoCore	3hexdcoa[m] + coa[m] + h2o[m] + nad[m] <=> accoa[m] + h[m] + nadh[m] + tetd7ecoa[m]	0.0242858	0.0212683	0.0202434	0.0136216	0.338095	0.191407	0.326928	0.1506	2.95107	0
r0634	accoa[m] + occoa[m] <=> 3odcoa[m] + coa[m]	-0.0242858	0.0212683	-0.0202434	0.0136216	-0.338095	0.191407	-0.326928	0.1506	2.95107	0
r0287	coa[m] + HC01408[m] <=> accoa[m] + btcoa[m]	0.0242858	0.0212683	0.0202434	0.0136216	0.338095	0.191407	0.326928	0.1506	2.95107	0
r0660	HC01401[m] <=> dd2coa[m] + h2o[m]	-0.0242858	0.0212683	-0.0202434	0.0136216	-0.338095	0.191407	-0.326928	0.1506	2.95107	0
r0726	HC01403[m] + nad[m] <=> 3odcoa[m] + h[m] + nadh[m]	0.0242858	0.0212683	0.0202434	0.0136216	0.338095	0.191407	0.326928	0.1506	2.95107	0
MTPC14_MitoCore	3tetd7ecoa[m] + coa[m] + h2o[m] + nad[m] <=> accoa[m] + ddcacoa[m] + h[m] + nadh[m]	0.0242858	0.0212683	0.0202434	0.0136216	0.338095	0.191407	0.326928	0.1506	2.95107	0
r0730	HC01405[m] + nad[m] <=> h[m] + HC01406[m] + nadh[m]	0.0242858	0.0212683	0.0202434	0.0136216	0.338095	0.191407	0.326928	0.1506	2.95107	0
r0724	accoa[m] + dcacoa[m] <=> 3oddcoa[m] + coa[m]	-0.0242858	0.0212683	-0.0202434	0.0136216	-0.338095	0.191407	-0.326928	0.1506	2.95107	0
r0731	h2o[m] + HC01415[m] <=> HC01405[m]	0.0242858	0.0212683	0.0202434	0.0136216	0.338095	0.191407	0.326928	0.1506	2.95107	0
r0722	HC01401[m] + nad[m] <=> 3oddcoa[m] + h[m] + nadh[m]	0.0242858	0.0212683	0.0202434	0.0136216	0.338095	0.191407	0.326928	0.1506	2.95107	0
CO2t	<=> co2[c]	-1.9277	0.478218	-1.87513	0.29768	-7.15838	3.13562	-6.94606	2.45032	2.8948	0
ACACT1rm	2 accoa[m] <=> aacoa[m] + coa[m]	-0.119115	0.0373593	-0.118703	0.0272049	-0.454742	0.196452	-0.441432	0.15204	2.87093	0
CO2tm	co2[c] <=> co2[m]	-1.17022	0.500183	-1.1443	0.31276	-6.40319	3.16722	-6.18093	2.47756	2.85377	0
ASPTA	akg[c] + asp_L[c] <=> glu_L[c] + oaa[c]	29.7619	0.739816	29.8379	0.480352	16.5152	8.62483	16.4634	6.64106	2.82908	0
MDH	mal_L[c] + nad[c] <=> h[c] + nadh[c] + oaa[c]	-29.9556	0.726917	-30.0152	0.477128	-16.735	8.61929	-16.7181	6.61409	2.82908	0
ASPTAm	akg[m] + asp_L[m] <=> glu_L[m] + oaa[m]	-29.6472	0.739579	-29.7223	0.479091	-16.4045	8.62504	-16.3472	6.6283	2.82823	0
ASPGLUmB_MitoCore	asp_L[m] + glu_L[c] + h[c] + PMF[c] <=> asp_L[c] + glu_L[m] + h[m] + PMF[m]	29.6468	0.739583	29.7216	0.478882	16.4042	8.62503	16.3471	6.62808	2.82822	0
MDHm	mal_L[m] + nad[m] <=> h[m] + nadh[m] + oaa[m]	29.3896	0.613785	29.4311	0.40987	18.7035	7.35006	18.5658	5.59236	2.68365	0
GHMT2rm	ser_L[m] + thf[m] <=> gly[m] + h2o[m] + mlthf[m]	0.0319821	0.0252719	0.0305715	0.0157508	1.95562e-14	1.02303e-13	2.57541e-14	7.6137e-14	2.53104	0
r1435	ser_L[c] <=> ser_L[m]	0.0323462	0.0252735	0.031006	0.0157097	0.000323519	0.000311382	0.000225204	0.000155829	2.50325	0
H2Ot	<=> h2o[c]	-32.1854	0.736267	-32.1433	0.485943	-22.2313	7.33321	-22.4216	5.37063	2.4671	0
ADK1	amp[c] + atp[c] <=> 2 adp[c]	0.366652	0.242618	0.313783	0.162385	2.13097	1.27056	1.77926	0.677345	2.33193	0
PPA	h2o[c] + ppi[c] <=> h[c] + 2 pi[c]	0.366652	0.242618	0.313783	0.162385	2.13097	1.27056	1.77926	0.677345	2.33193	0
r1451	dcacoa[m] + q10[m] <=> dc2coa[m] + q10h2[m]	0.202137	0.15675	0.161116	0.092479	3.88244	3.02779	3.10185	1.78046	2.31136	0
ACSm	ac[m] + atp[m] + coa[m] <=> accoa[m] + amp[m] + ppi[m]	1.3549e-14	1.36436e-13	1.32956e-14	9.98525e-14	0.00113548	0.000982571	0.000863122	0.000583148	2.31124	0
r0205	glyc3p[c] + q10[m] <=> dhap[c] + q10h2[m]	0.174994	0.155659	0.132067	0.0870902	5.69578	4.67382	4.57406	2.9092	2.28628	0
r1450	HC01409[m] + q10[m] <=> HC01410[m] + q10h2[m]	0.199794	0.153044	0.16082	0.0883161	3.39862	2.65686	2.6837	1.57125	2.27682	0
ACADLC16_MitoCore	h2o[m] + pmtcoa[m] + q10[m] <=> 3hexdcoa[m] + q10h2[m]	0.214397	0.15745	0.175091	0.098314	3.7174	3.00684	2.85691	1.72446	2.21409	0
ACADLC14_MitoCore	h2o[m] + q10[m] + tetd7ecoa[m] <=> 3tetd7ecoa[m] + q10h2[m]	0.221612	0.164602	0.179336	0.0998769	3.75446	3.06295	2.87334	1.70614	2.18918	0
ACCOALm	atp[m] + coa[m] + ppa[m] <=> amp[m] + ppcoa[m] + ppi[m]	-3.09268e-14	1.3054e-13	-3.12515e-14	8.90481e-14	3.09528	2.84058	2.28106	1.53716	2.17933	0
ADK1m	amp[m] + atp[m] <=> 2 adp[m]	0.00302853	0.00173273	0.00304002	0.00149642	3.09936	2.84054	2.28402	1.53748	2.17877	0
G3PD1	glyc3p[c] + nad[c] <=> dhap[c] + h[c] + nadh[c]	-0.857918	0.293176	-0.845759	0.204327	-6.27916	4.68652	-5.15214	2.90281	2.17734	0
r1448	occoa[m] + q10[m] <=> HC01415[m] + q10h2[m]	0.226095	0.188537	0.169263	0.0970129	3.49949	2.8192	2.68029	1.60192	2.17665	0
r1447	ddcacoa[m] + q10[m] <=> dd2coa[m] + q10h2[m]	0.215194	0.173685	0.165614	0.0918742	3.78329	3.15674	2.84957	1.69614	2.14272	0
ASNS1	asp_L[c] + atp[c] + gln_L[c] + h2o[c] <=> amp[c] + asn_L[c] + glu_L[c] + h[c] + ppi[c]	0.0108726	0.0106094	0.00757965	0.00523015	1.34704	1.25099	0.982258	0.686232	2.11822	0
r0735	dcacoa[m] + nadp[m] <=> dc2coa[m] + h[m] + nadph[m]	-0.177851	0.156691	-0.134992	0.0931218	-3.54435	3.04043	-2.73607	1.77745	2.10596	0
r0791	h[m] + HC01410[m] + nadph[m] <=> HC01409[m] + nadp[m]	0.175508	0.153577	0.132788	0.0866707	3.06053	2.64917	2.36177	1.57801	2.05871	0
MECR16C_MitoCore	3hexdcoa[m] + h[m] + nadph[m] <=> nadp[m] + pmtcoa[m]	0.190112	0.158666	0.149639	0.0989376	3.37931	3.00918	2.48787	1.71337	2.01348	0
MECR14C_MitoCore	3tetd7ecoa[m] + h[m] + nadph[m] <=> nadp[m] + tetd7ecoa[m]	0.197326	0.165927	0.153619	0.0994804	3.41636	3.06725	2.52084	1.69569	1.99125	0
r0633	nadp[m] + occoa[m] <=> h[m] + HC01415[m] + nadph[m]	-0.201809	0.189523	-0.144562	0.0983307	-3.16139	2.8238	-2.36098	1.59865	1.96433	0
r0638	ddcacoa[m] + nadp[m] <=> dd2coa[m] + h[m] + nadph[m]	-0.190908	0.174649	-0.139468	0.0936298	-3.44519	3.16665	-2.54515	1.71291	1.94791	0
r2435	crn[m] + pmtcrn[c] <=> crn[c] + pmtcrn[m]	0.331477	0.241674	0.277539	0.160323	0.759409	0.199787	0.795759	0.138884	1.93871	0
C160CPT1	crn[c] + pmtcoa[c] <=> coa[c] + pmtcrn[c]	0.331477	0.241674	0.277539	0.160323	0.759409	0.199787	0.795759	0.138884	1.93871	0
C160CPT2	coa[m] + pmtcrn[m] <=> crn[m] + pmtcoa[m]	0.331477	0.241674	0.277539	0.160323	0.759409	0.199787	0.795759	0.138884	1.93871	0
FACOAL160i	atp[c] + coa[c] + hdca[c] <=> amp[c] + pmtcoa[c] + ppi[c]	0.331477	0.241674	0.277539	0.160323	0.759409	0.199787	0.795759	0.138884	1.93871	0
PPAtmB_MitoCore	0.82 PMF[m] + ppa[c] <=> 0.82 PMF[c] + ppa[m]	-3.17627e-14	1.55992e-13	-3.07014e-14	1.08027e-13	-0.0939984	0.0971428	-0.0671232	0.0441994	1.93526	0
PPAt	<=> ppa[c]	-7.42173e-14	1.87405e-13	-7.47585e-14	1.34497e-13	-0.0939984	0.0971428	-0.0671232	0.0441994	1.93526	0
HDCAtr	<=> hdca[c]	0.294403	0.241057	0.241043	0.16054	0.719076	0.200083	0.753784	0.141714	1.92535	0
PPAm	h2o[m] + ppi[m] <=> h[m] + 2 pi[m]	0.879981	0.393077	0.833739	0.279923	3.91836	2.83423	3.11326	1.53192	1.88292	0
MMEm	mmcoa_R[m] <=> mmcoa_S[m]	-0.010074	0.00351921	-0.0102856	0.00262183	0.0801141	0.0973687	0.0530539	0.0442597	1.78789	0
MMMm	mmcoa_R[m] <=> succoa[m]	0.010074	0.00351921	0.0102856	0.00262183	-0.0801141	0.0973687	-0.0530539	0.0442597	1.78789	0
NADHt_MitoCore	<=> nadh[c]	29.6436	0.898954	29.7244	0.583925	21.787	8.96313	22.3621	7.03826	1.59329	0
NADt_MitoCore	<=> nad[c]	-29.6436	0.898954	-29.7244	0.583925	-21.787	8.96313	-22.3621	7.03826	1.59329	0
NH4t3r	nh4[c] <=> h[c]	0.0699957	0.038119	0.0690653	0.0251316	0.125948	0.0374474	0.127583	0.0248029	1.48089	0
GLYtm	gly[c] <=> gly[m]	0.00614824	0.031744	0.00574864	0.0167988	0.0436848	0.0195042	0.0413227	0.0133506	1.46489	0
FCLTm	fe2[m] + ppp9[m] <=> 2 h[m] + pheme[m]	0.00870159	0.00488129	0.00784092	0.00304772	0.00377528	0.00187979	0.00352028	0.00127496	1.45726	0
PPPGOmB_MitoCore	3 o2[m] + 2 pppg9[c] <=> 6 h2o[m] + 2 ppp9[m]	0.00435079	0.00244064	0.00392046	0.00152386	0.00188764	0.000939896	0.00176014	0.000637479	1.45726	0
UPPDC1	4 h[c] + uppg3[c] <=> 4 co2[c] + cpppg3[c]	0.00870159	0.00488129	0.00784092	0.00304772	0.00377528	0.00187979	0.00352028	0.00127496	1.45726	0
HMBS	h2o[c] + 4 ppbng[c] <=> hmbil[c] + 4 nh4[c]	0.00870159	0.00488129	0.00784092	0.00304772	0.00377528	0.00187979	0.00352028	0.00127496	1.45726	0
CPPPGO	cpppg3[c] + 2 h[c] + o2[c] <=> 2 co2[c] + 2 h2o[c] + pppg9[c]	0.00870159	0.00488129	0.00784092	0.00304772	0.00377528	0.00187979	0.00352028	0.00127496	1.45726	0
UPP3S	hmbil[c] <=> h2o[c] + uppg3[c]	0.00870159	0.00488129	0.00784092	0.00304772	0.00377528	0.00187979	0.00352028	0.00127496	1.45726	0
FE2tm	fe2[c] + 1.64 PMF[c] <=> fe2[m] + 1.64 PMF[m]	0.00870159	0.00488129	0.00784092	0.00304772	0.00377528	0.00187979	0.00352028	0.00127496	1.45726	0
5AOPtm	5aop[m] <=> 5aop[c]	0.0696127	0.0390503	0.0627274	0.0243817	0.0302022	0.0150383	0.0281623	0.0101997	1.45726	0
PPBNGS	2 5aop[c] <=> h[c] + 2 h2o[c] + ppbng[c]	0.0348064	0.0195252	0.0313637	0.0121909	0.0151011	0.00751917	0.0140811	0.00509983	1.45726	0
ALASm	gly[m] + h[m] + succoa[m] <=> 5aop[m] + co2[m] + coa[m]	0.0696127	0.0390503	0.0627274	0.0243817	0.0302022	0.0150383	0.0281623	0.0101997	1.45726	0
r1154	2obut[m] + coa[m] + nad[m] <=> co2[m] + nadh[m] + ppcoa[m]	0.00209254	0.00129495	0.0020239	0.00110279	0.0057441	0.00381604	0.00521218	0.00285064	1.42891	0
r1155	2obut[c] + h[c] + 0.18 PMF[c] <=> 2obut[m] + h[m] + 0.18 PMF[m]	0.00209254	0.00129495	0.0020239	0.00110279	0.0057441	0.00381604	0.00521218	0.00285064	1.42891	0
2HBO	2hb[c] + nad[c] <=> 2obut[c] + h[c] + nadh[c]	-0.00217109	0.0012838	-0.00213686	0.00107538	-0.00566251	0.00380142	-0.00513933	0.00293884	1.37316	0
2HBt2	<=> 2hb[c] + h[c]	-0.00217109	0.0012838	-0.00213686	0.00107538	-0.00566251	0.00380142	-0.00513933	0.00293884	1.37316	0
PHEMEtm	atp[m] + 1.64 PMF[c] + pheme[m] <=> adp[m] + h[m] + 1.64 PMF[m] + pheme[c] + pi[m]	0.00582776	0.0039273	0.00501821	0.00246577	0.00254018	0.00155508	0.00226199	0.0010084	1.19933	0
r1512	<=> bilirub[c]	-0.00582776	0.0039273	-0.00501821	0.00246577	-0.00254018	0.00155508	-0.00226199	0.0010084	1.19933	0
HOXG	5 h[c] + 3 nadph[c] + 3 o2[c] + pheme[c] <=> biliverd[c] + co[c] + fe2[c] + 3 h2o[c] + 3 nadp[c]	0.00582776	0.0039273	0.00501821	0.00246577	0.00254018	0.00155508	0.00226199	0.0010084	1.19933	0
COt	co[c] <=>	0.00582776	0.0039273	0.00501821	0.00246577	0.00254018	0.00155508	0.00226199	0.0010084	1.19933	0
GTHPm	2 gthrd[m] + h2o2[m] <=> gthox[m] + 2 h2o[m]	0.0292236	0.000199649	0.0291625	0.000112139	0.0212691	0.013845	0.0174589	0.00665326	1.13274	0
GTHOm	gthox[m] + h[m] + nadph[m] <=> 2 gthrd[m] + nadp[m]	0.0292236	0.000199649	0.0291625	0.000112139	0.0212691	0.013845	0.0174589	0.00665326	1.13274	0
GHMT2r	ser_L[c] + thf[c] <=> gly[c] + h2o[c] + mlthf[c]	0.0225131	0.0222498	0.0157741	0.0108784	0.0466717	0.0216063	0.0453021	0.0150097	1.10172	0
FTHFDH	10fthf[c] + h2o[c] + nadp[c] <=> co2[c] + h[c] + nadph[c] + thf[c]	0.0225131	0.0222498	0.0157741	0.0108784	0.0466717	0.0216063	0.0453021	0.0150097	1.10172	0
MTHFD	mlthf[c] + nadp[c] <=> methf[c] + nadph[c]	0.0225131	0.0222498	0.0157741	0.0108784	0.0466717	0.0216063	0.0453021	0.0150097	1.10172	0
MTHFC	h2o[c] + methf[c] <=> 10fthf[c] + h[c]	0.0225131	0.0222498	0.0157741	0.0108784	0.0466717	0.0216063	0.0453021	0.0150097	1.10172	0
